# Supplementary material for: Child Mortality Estimation 2013: An Overview of Updates in Estimation Methods by the United Nations Inter-Agency Group for Child Mortality Estimation
Source: PLOS journal article supplement (doi:10.1371/journal.pone.0101112), 2014-07-11

# Afghanistan

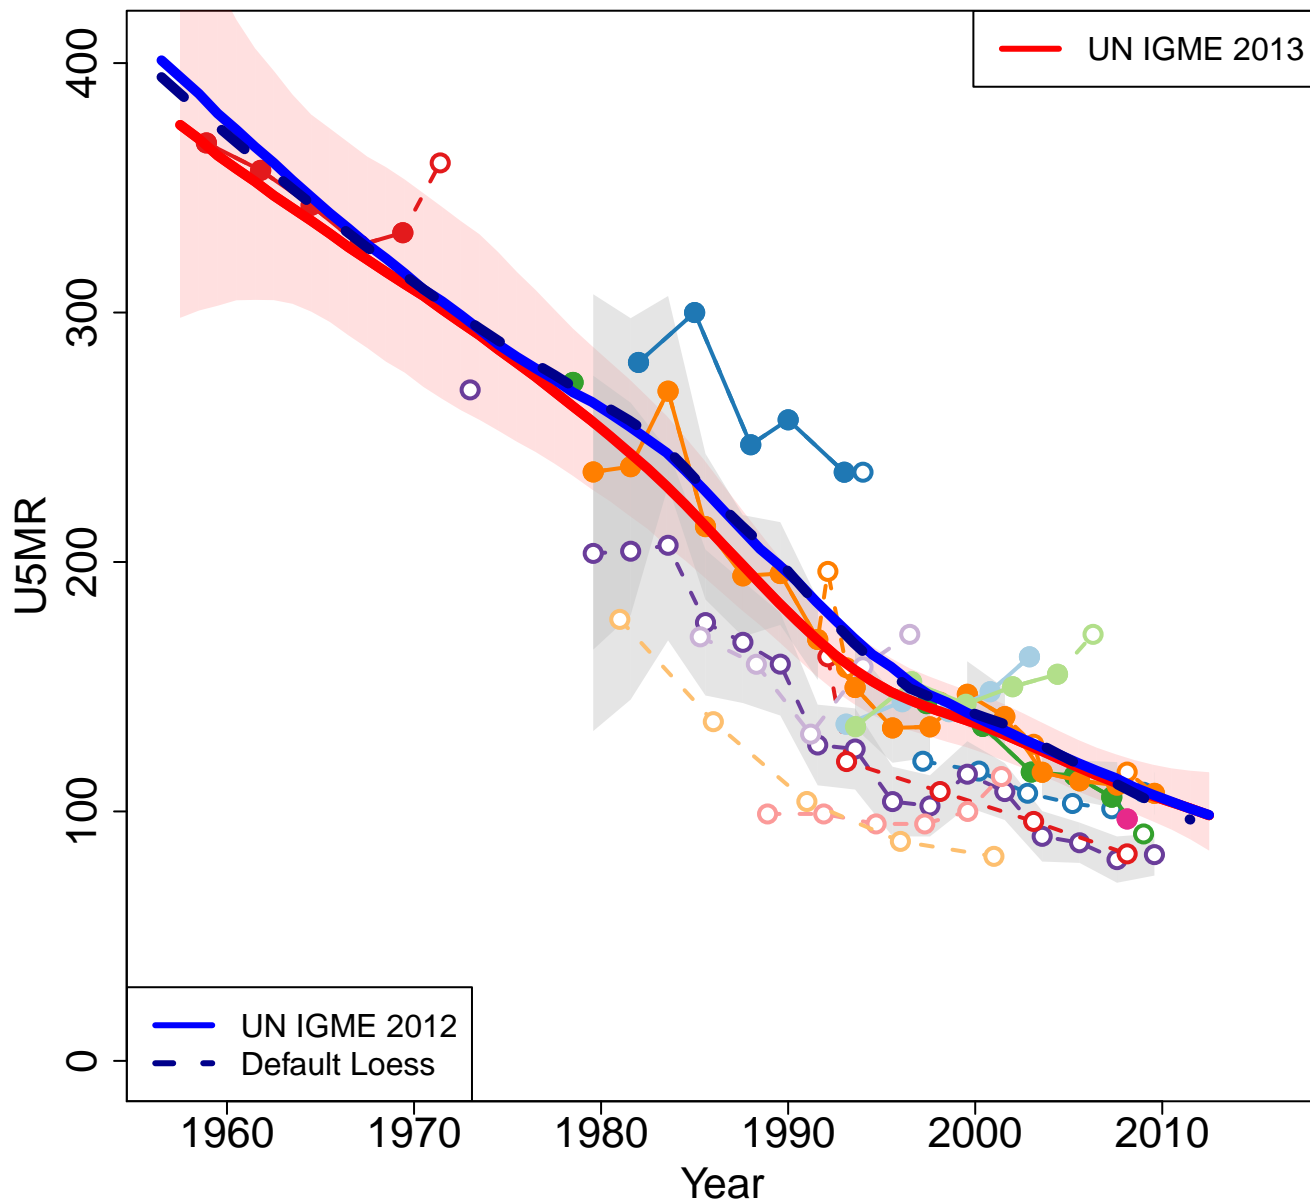

# Zoomed in

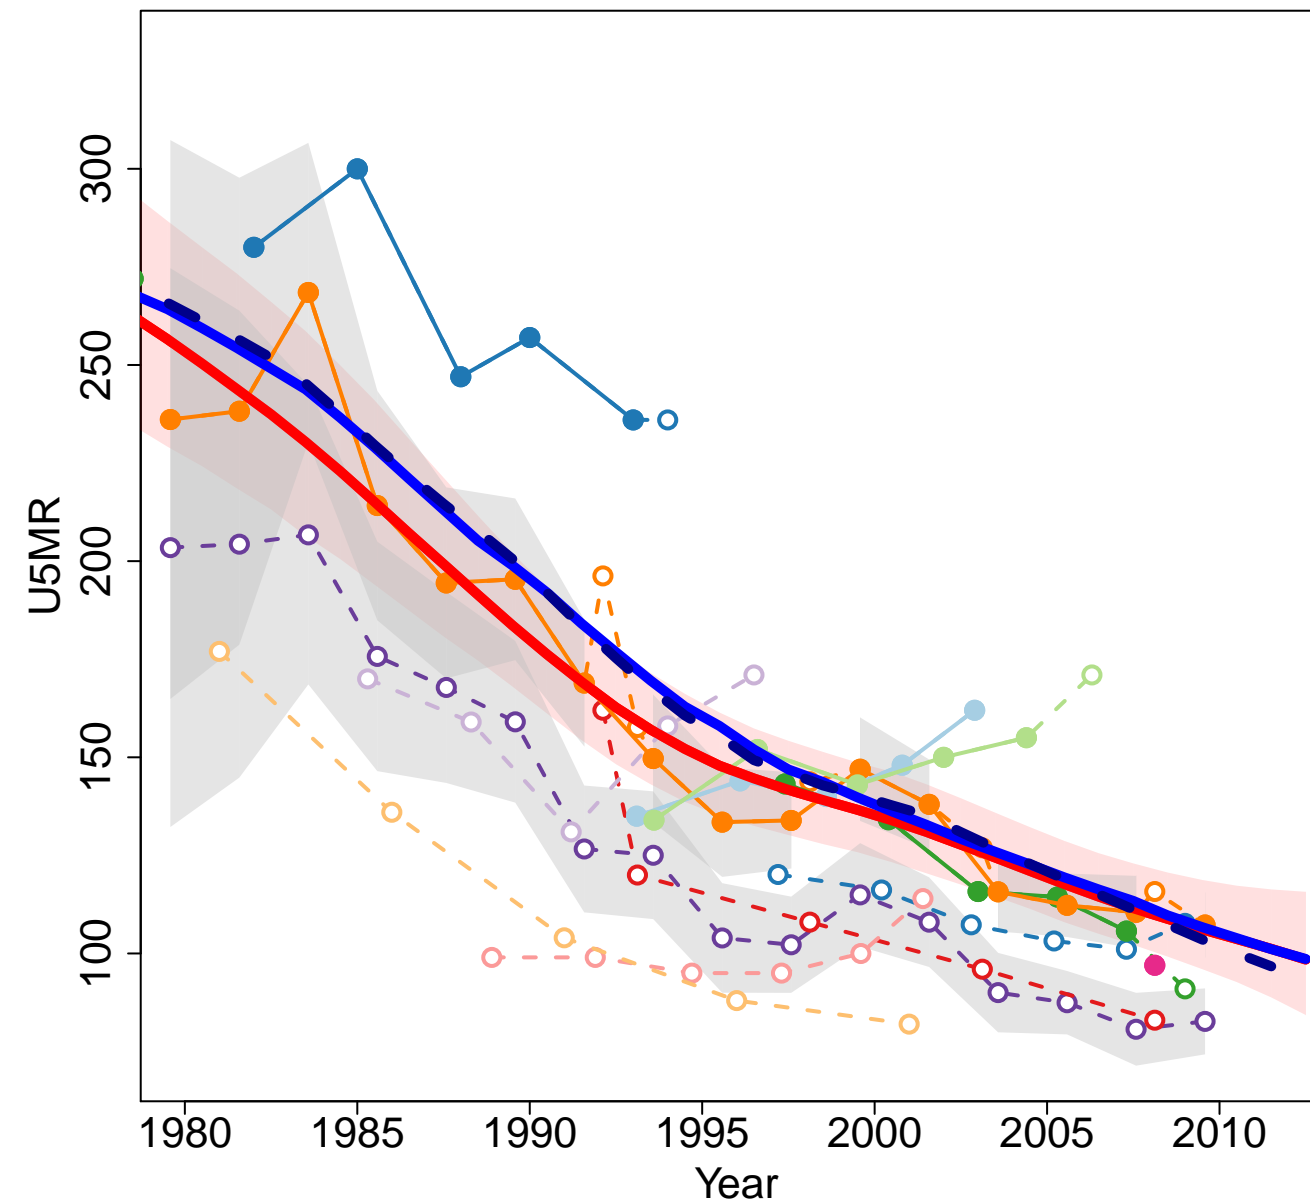

- National Demographic and Family Guidance Survey 1972 (Others Indirect)
- National Demographic and Family Guidance Survey 1973 (Others Household Deaths)
- Census 1978 (Others Household Deaths)
- Multiple Indicator Cluster Survey 1997 (MICS Indirect)
- Multiple Indicator Cluster Survey 2000 (MICS Indirect)
- Multiple Indicator Cluster Survey 2003 (MICS Direct)
- Multiple Indicator Cluster Survey 2003 (MICS Indirect)
- National Risk and Vulnerability Assessment Survey 2007–2008 (Others Indirect)
- Demographic and Health Survey 2007 (Other DHS Indirect)
- Afghanistan Mortality Survey 2008 (Others Household Deaths)
- Afghanistan Mortality Survey 2010 (DHS Direct)
- Afghanistan Mortality Survey 2010 (DHS Direct)
- Multiple Indicator Cluster Survey Excluding South 2011 (MICS Indirect)
- Multiple Indicator Cluster Survey 2011 (MICS Indirect)

# Albania

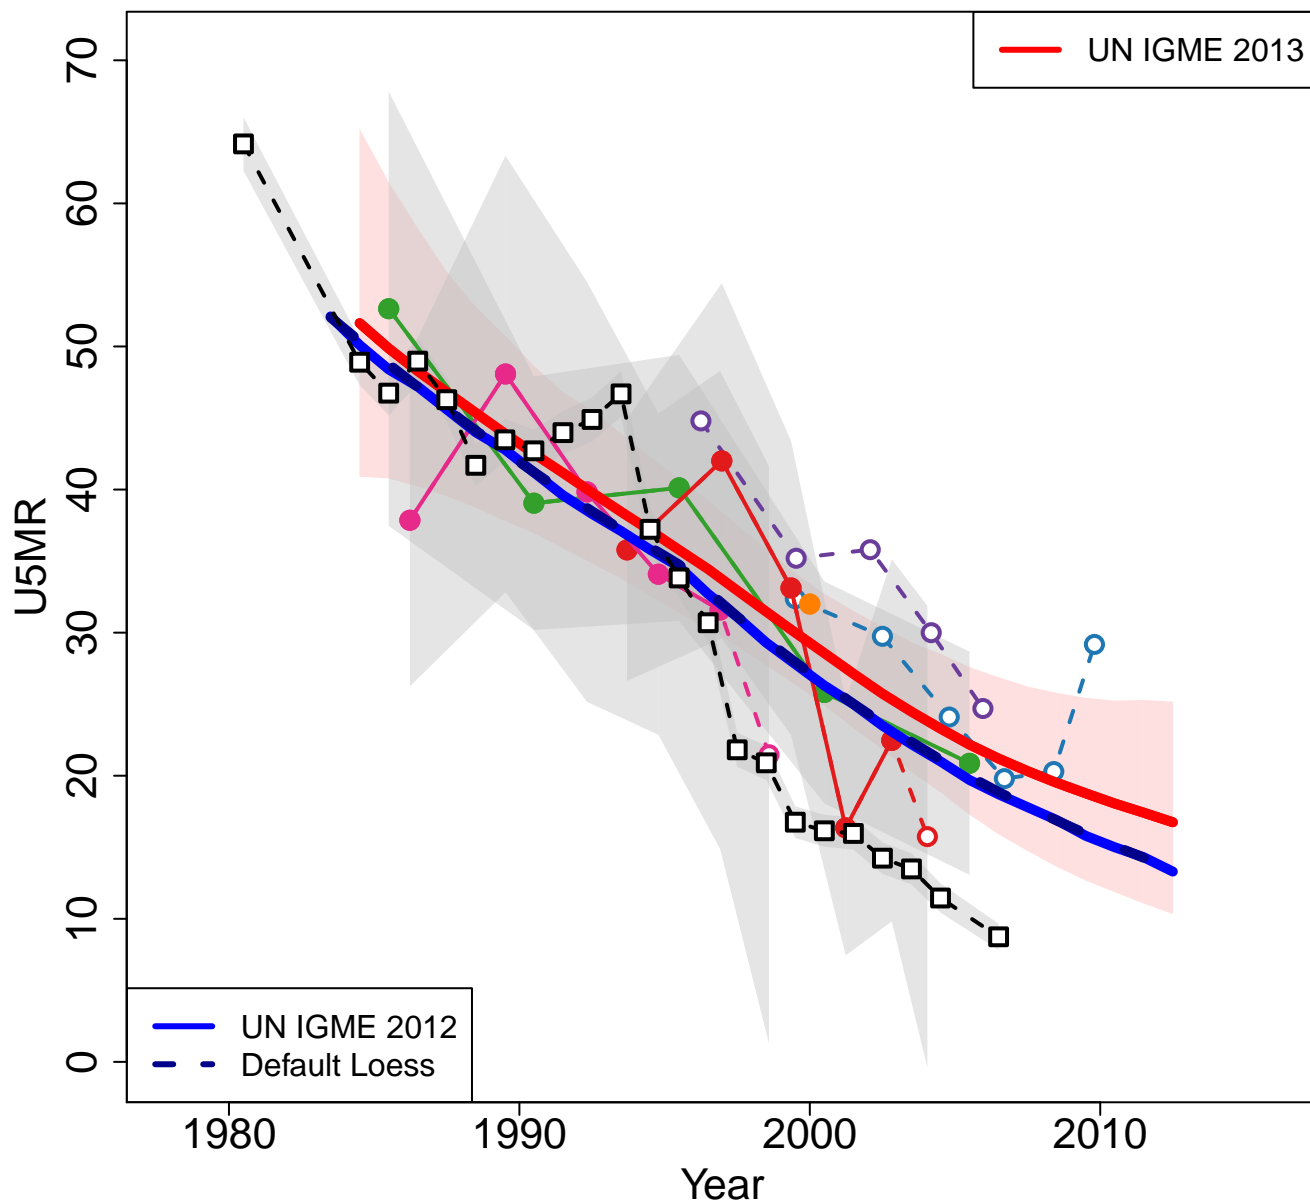

# Zoomed in

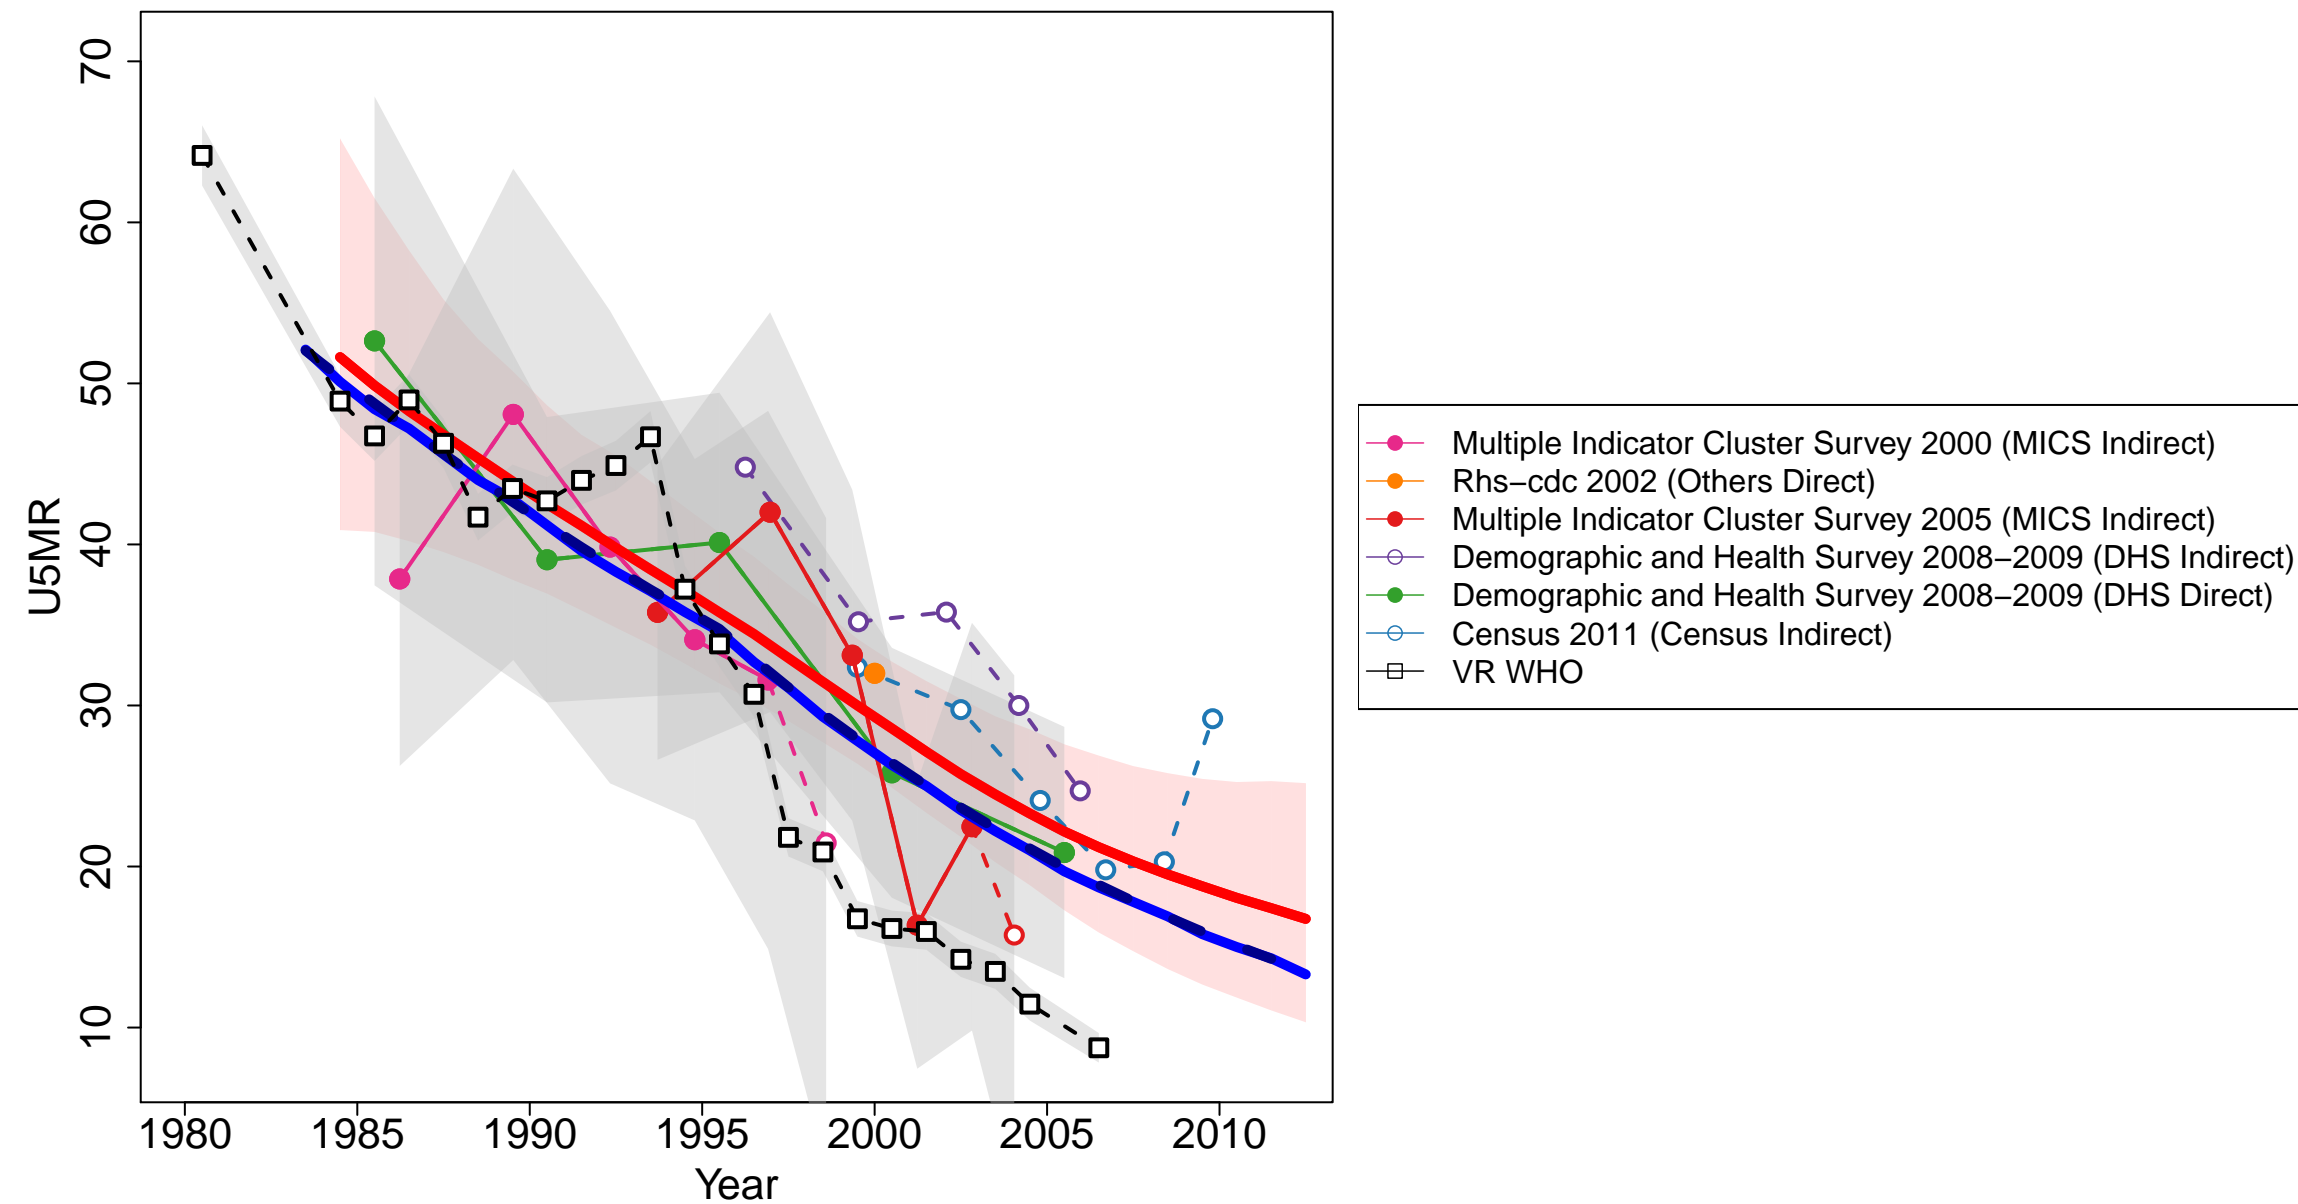

# Algeria

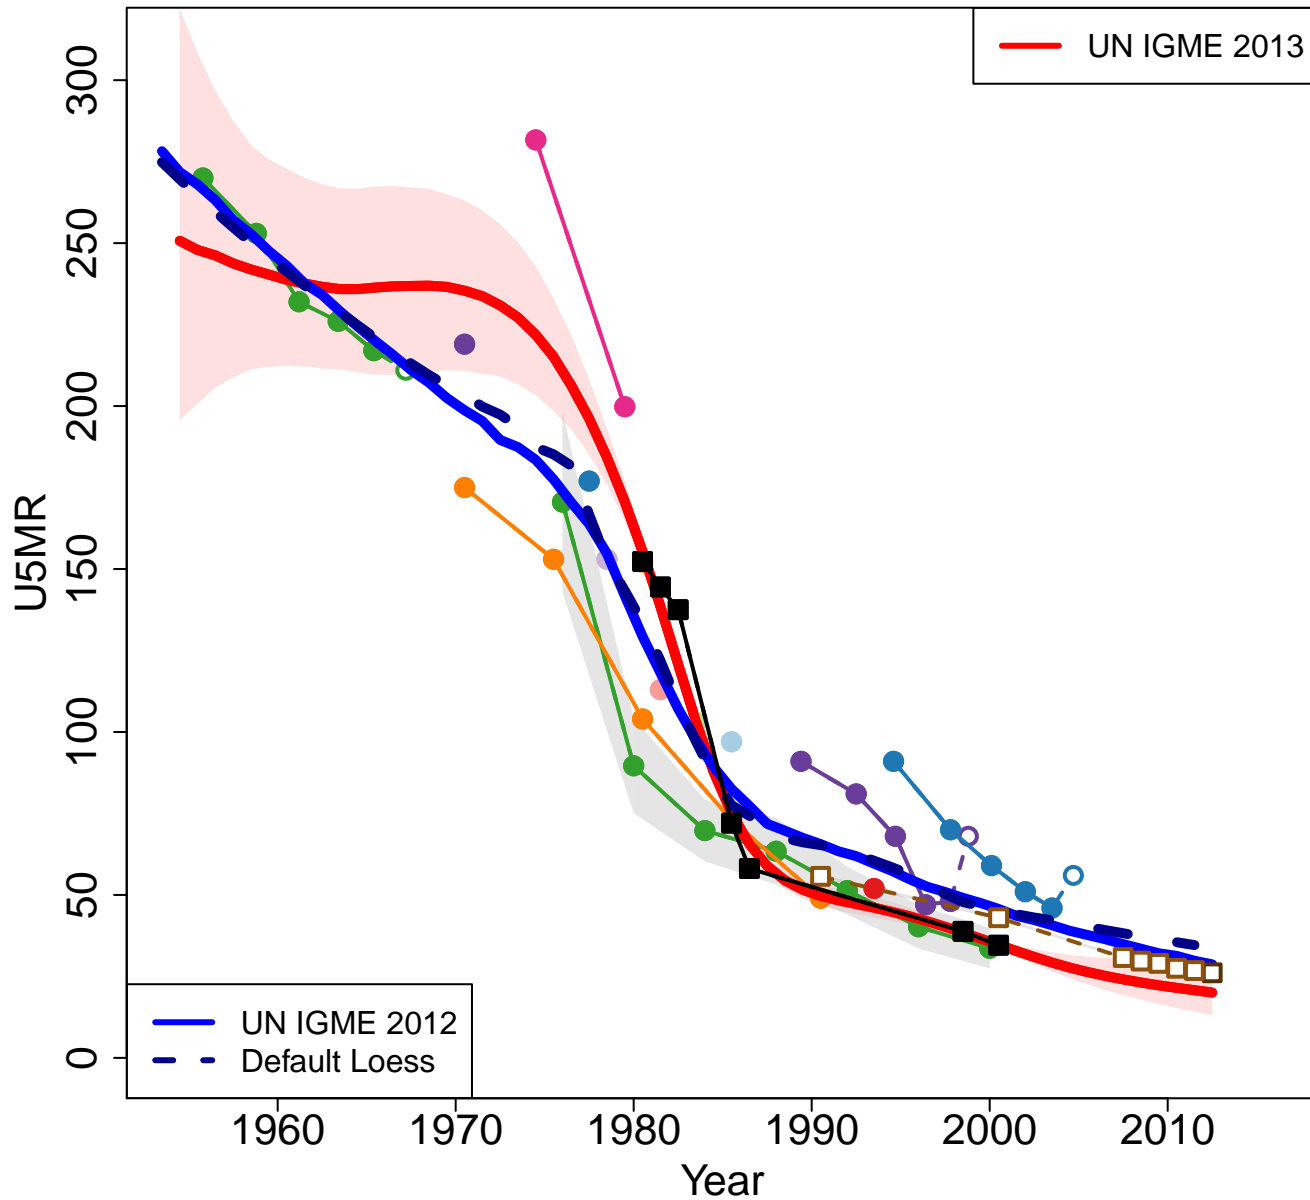

# Zoomed in

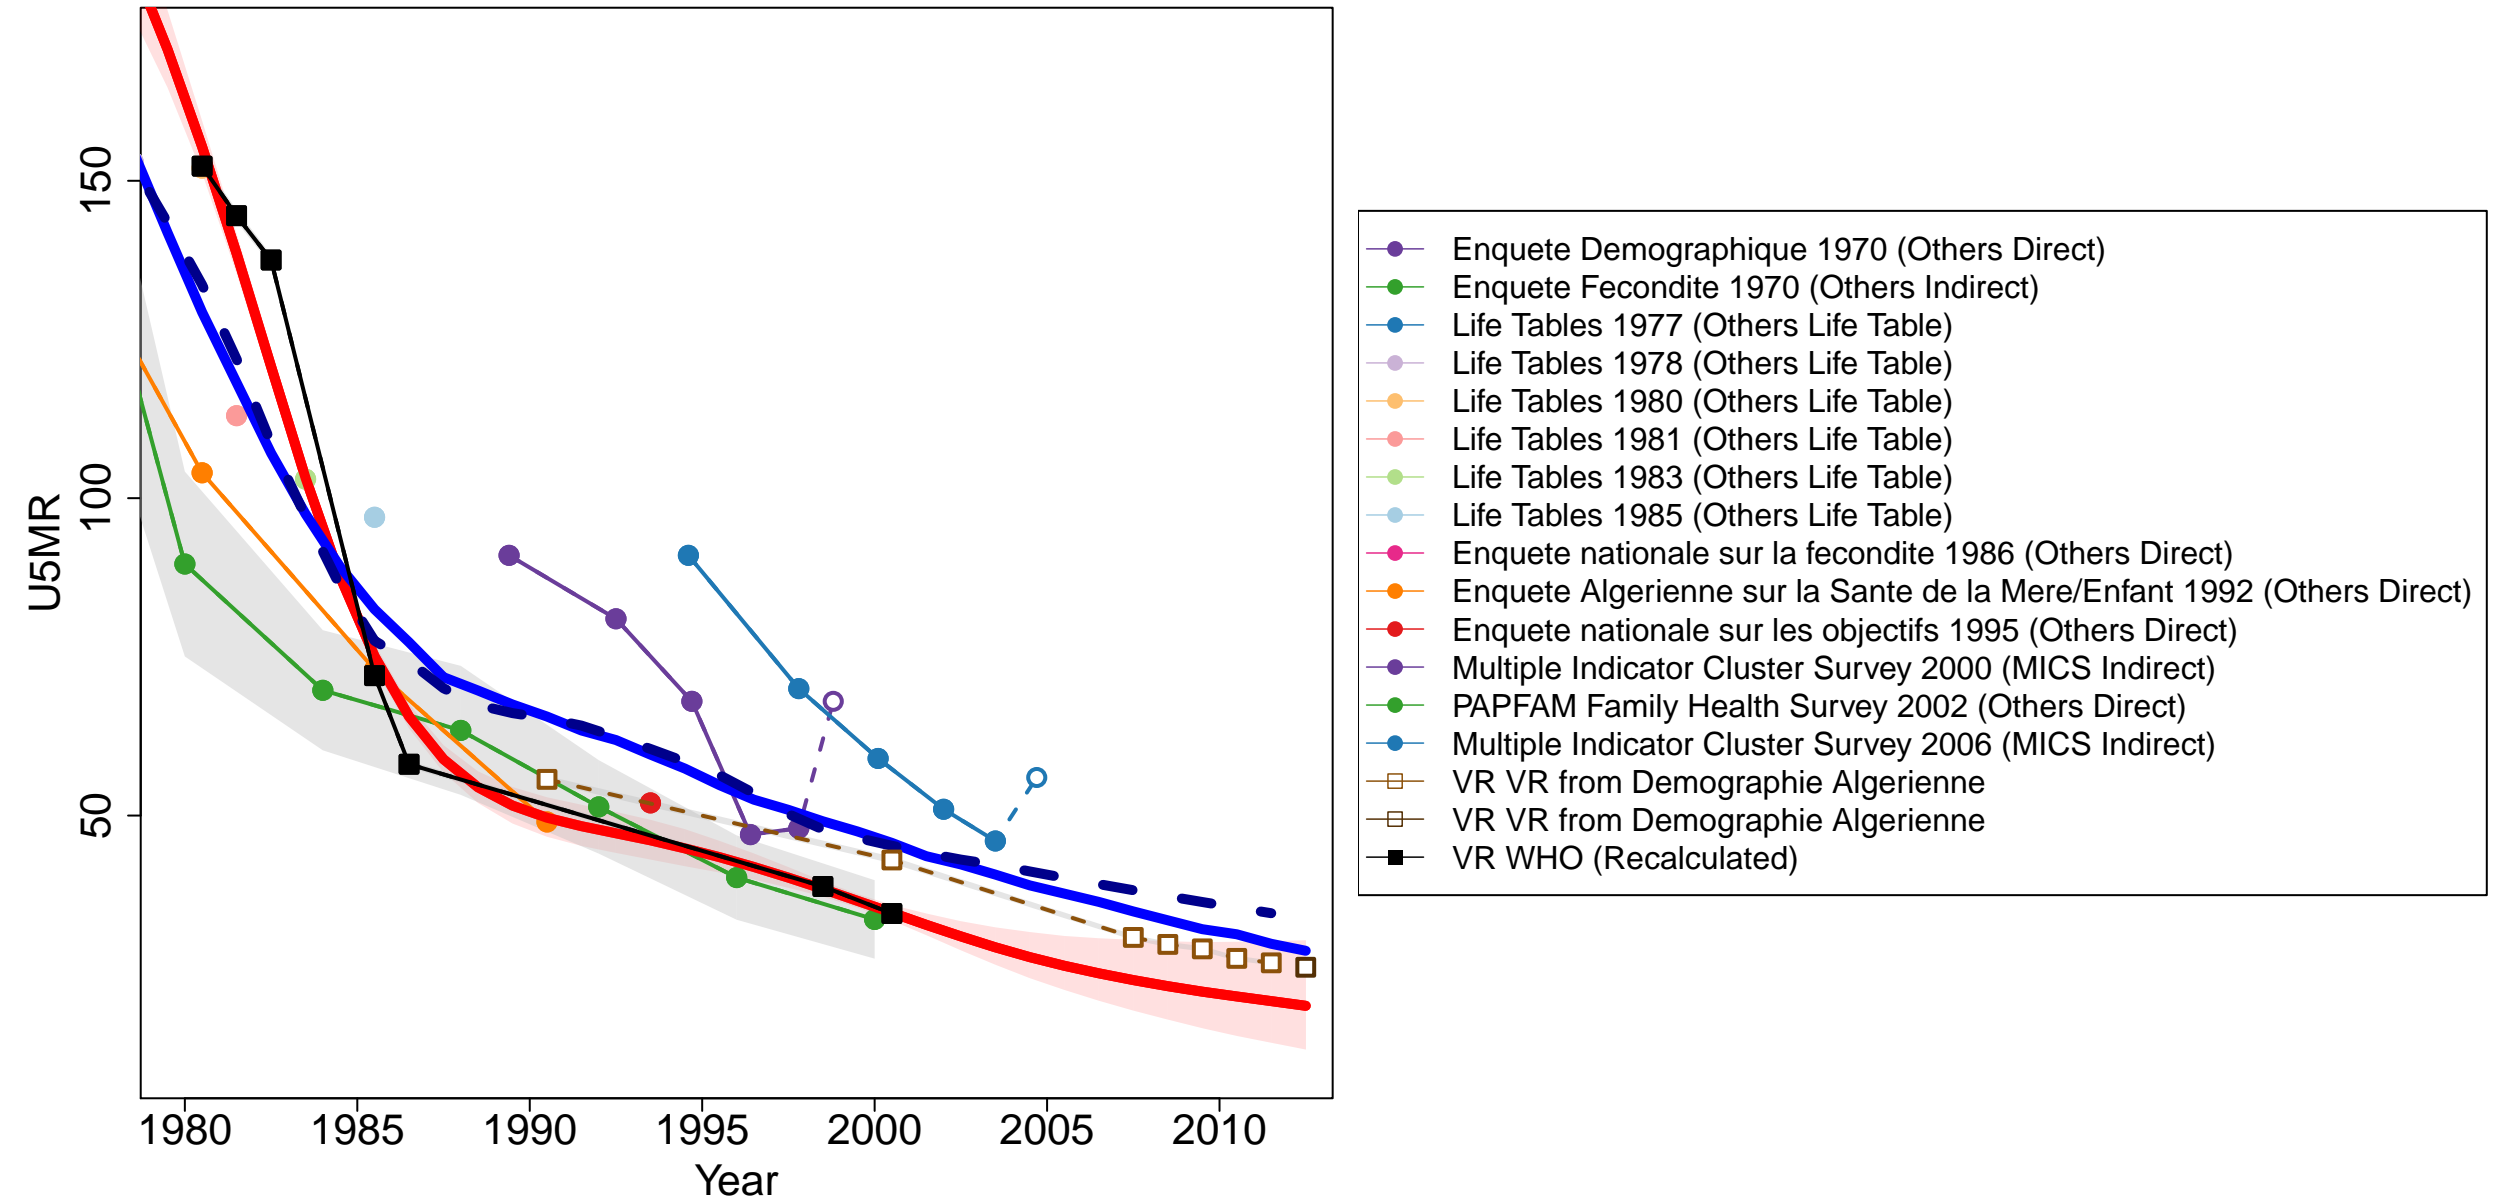

# Andorra

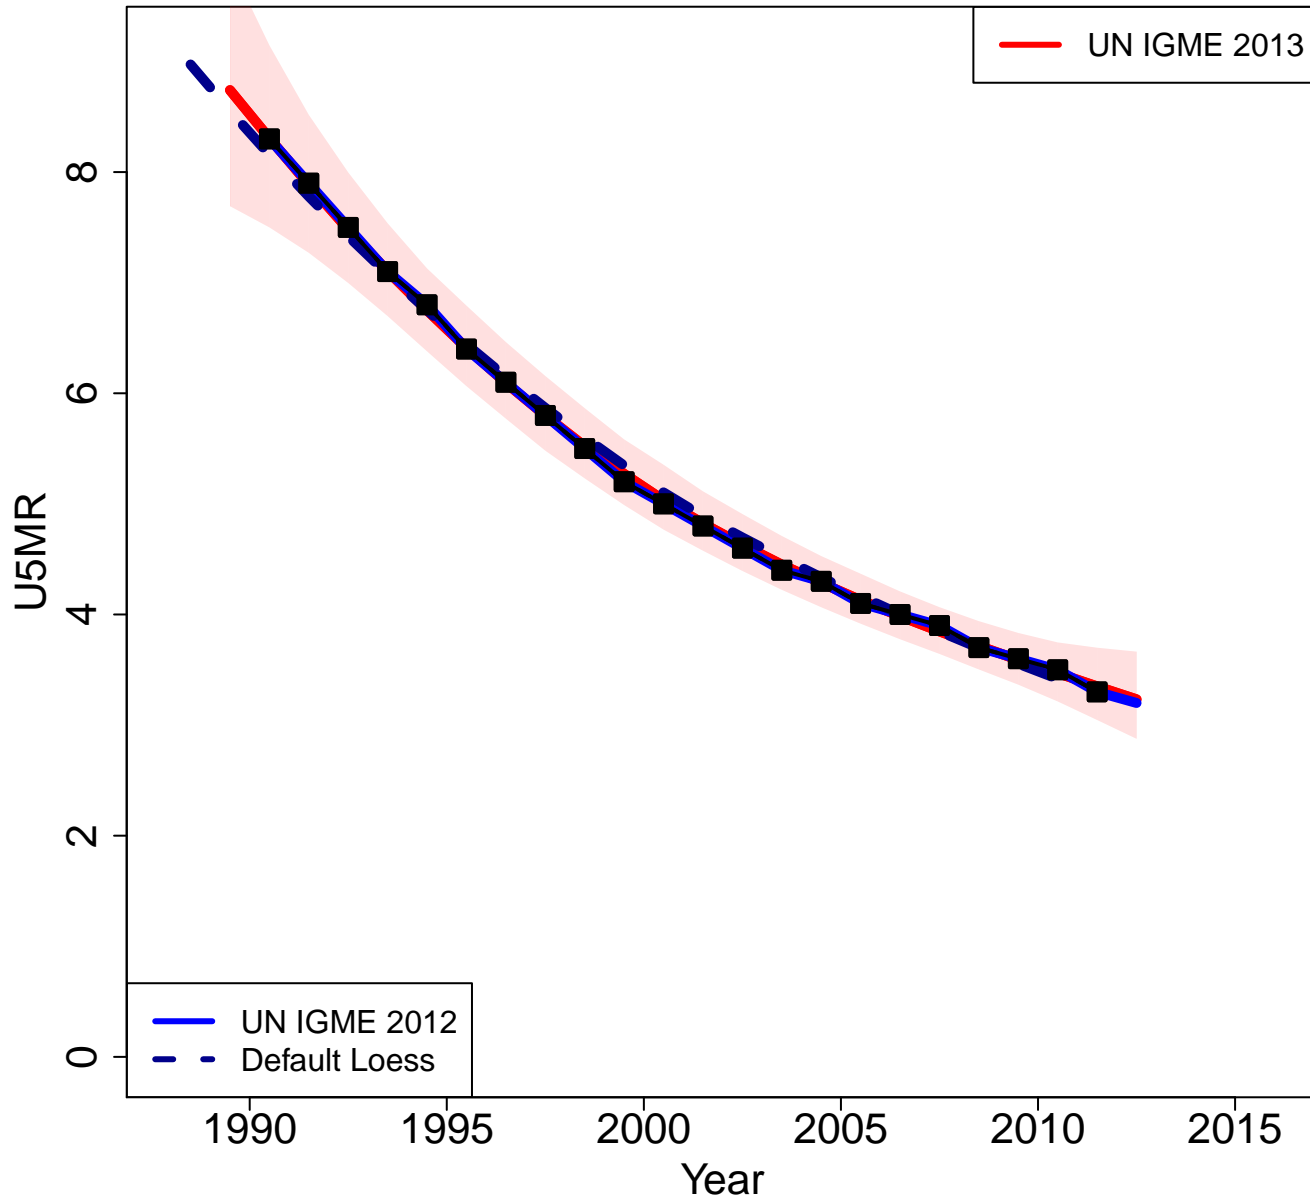

# Zoomed in

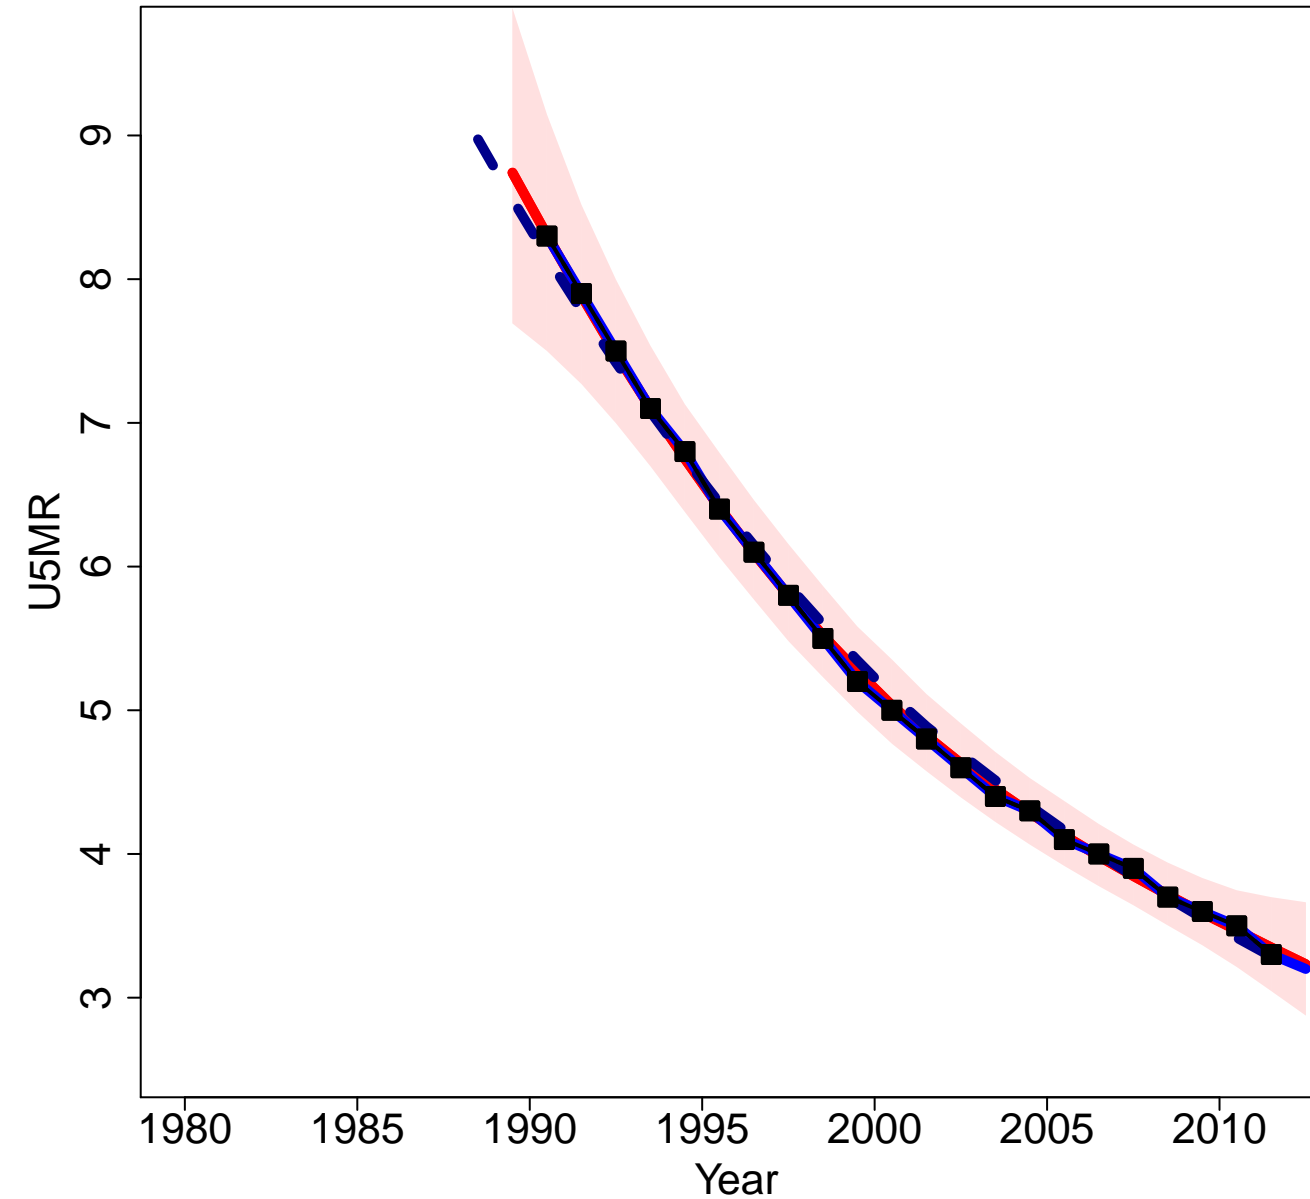

# Angola

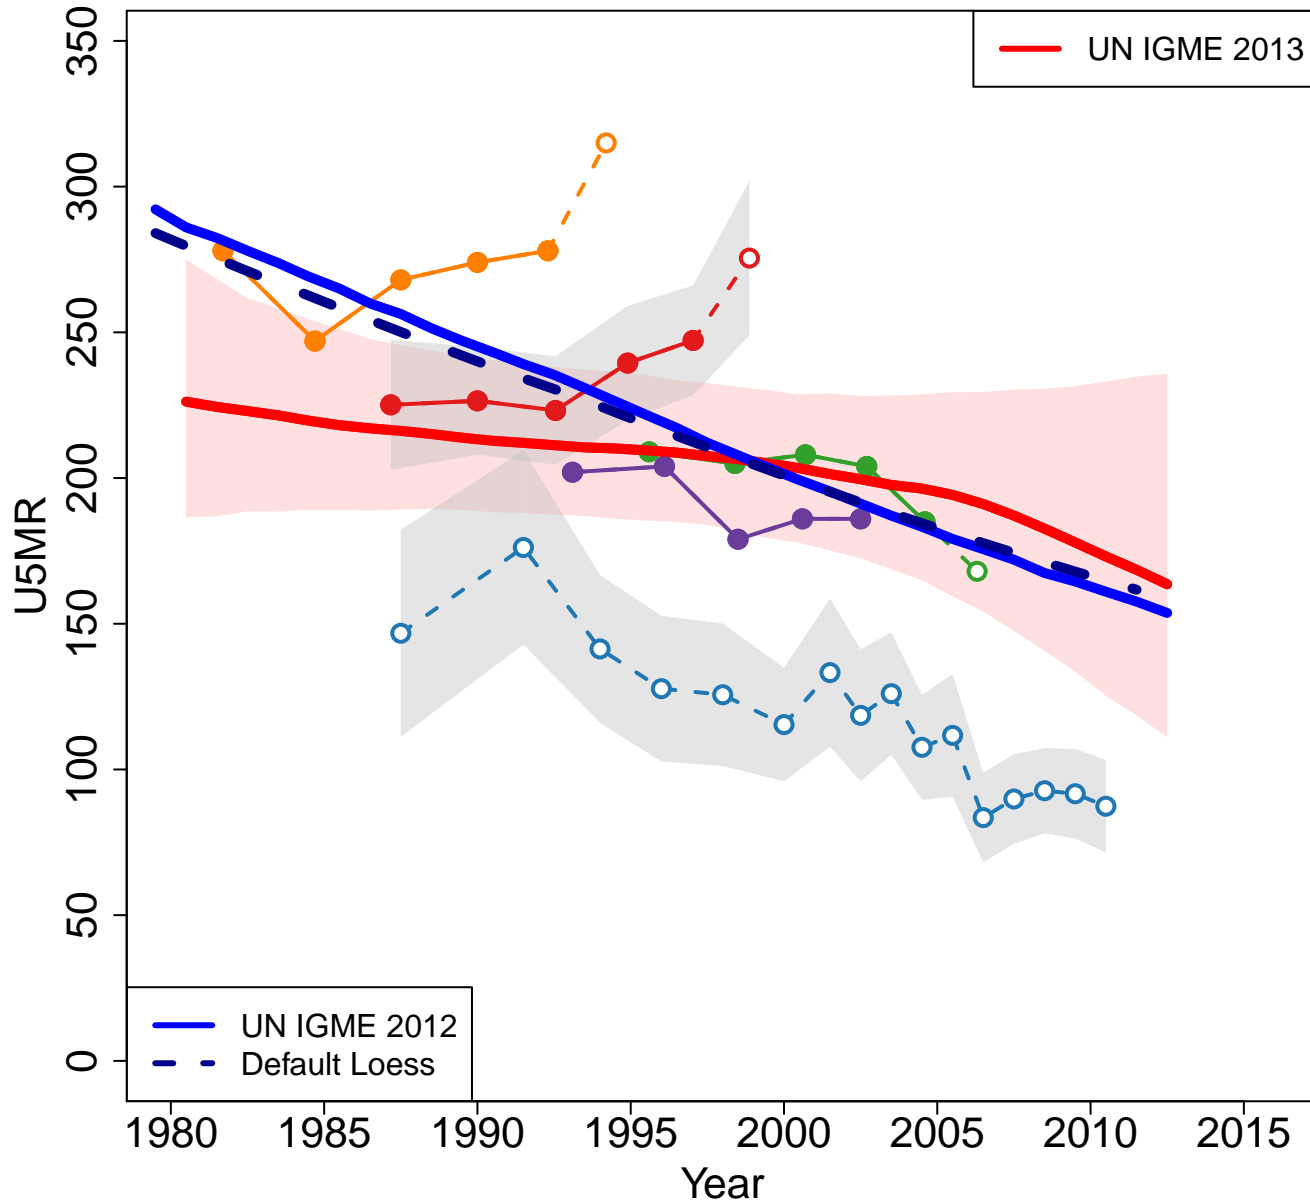

# Zoomed in

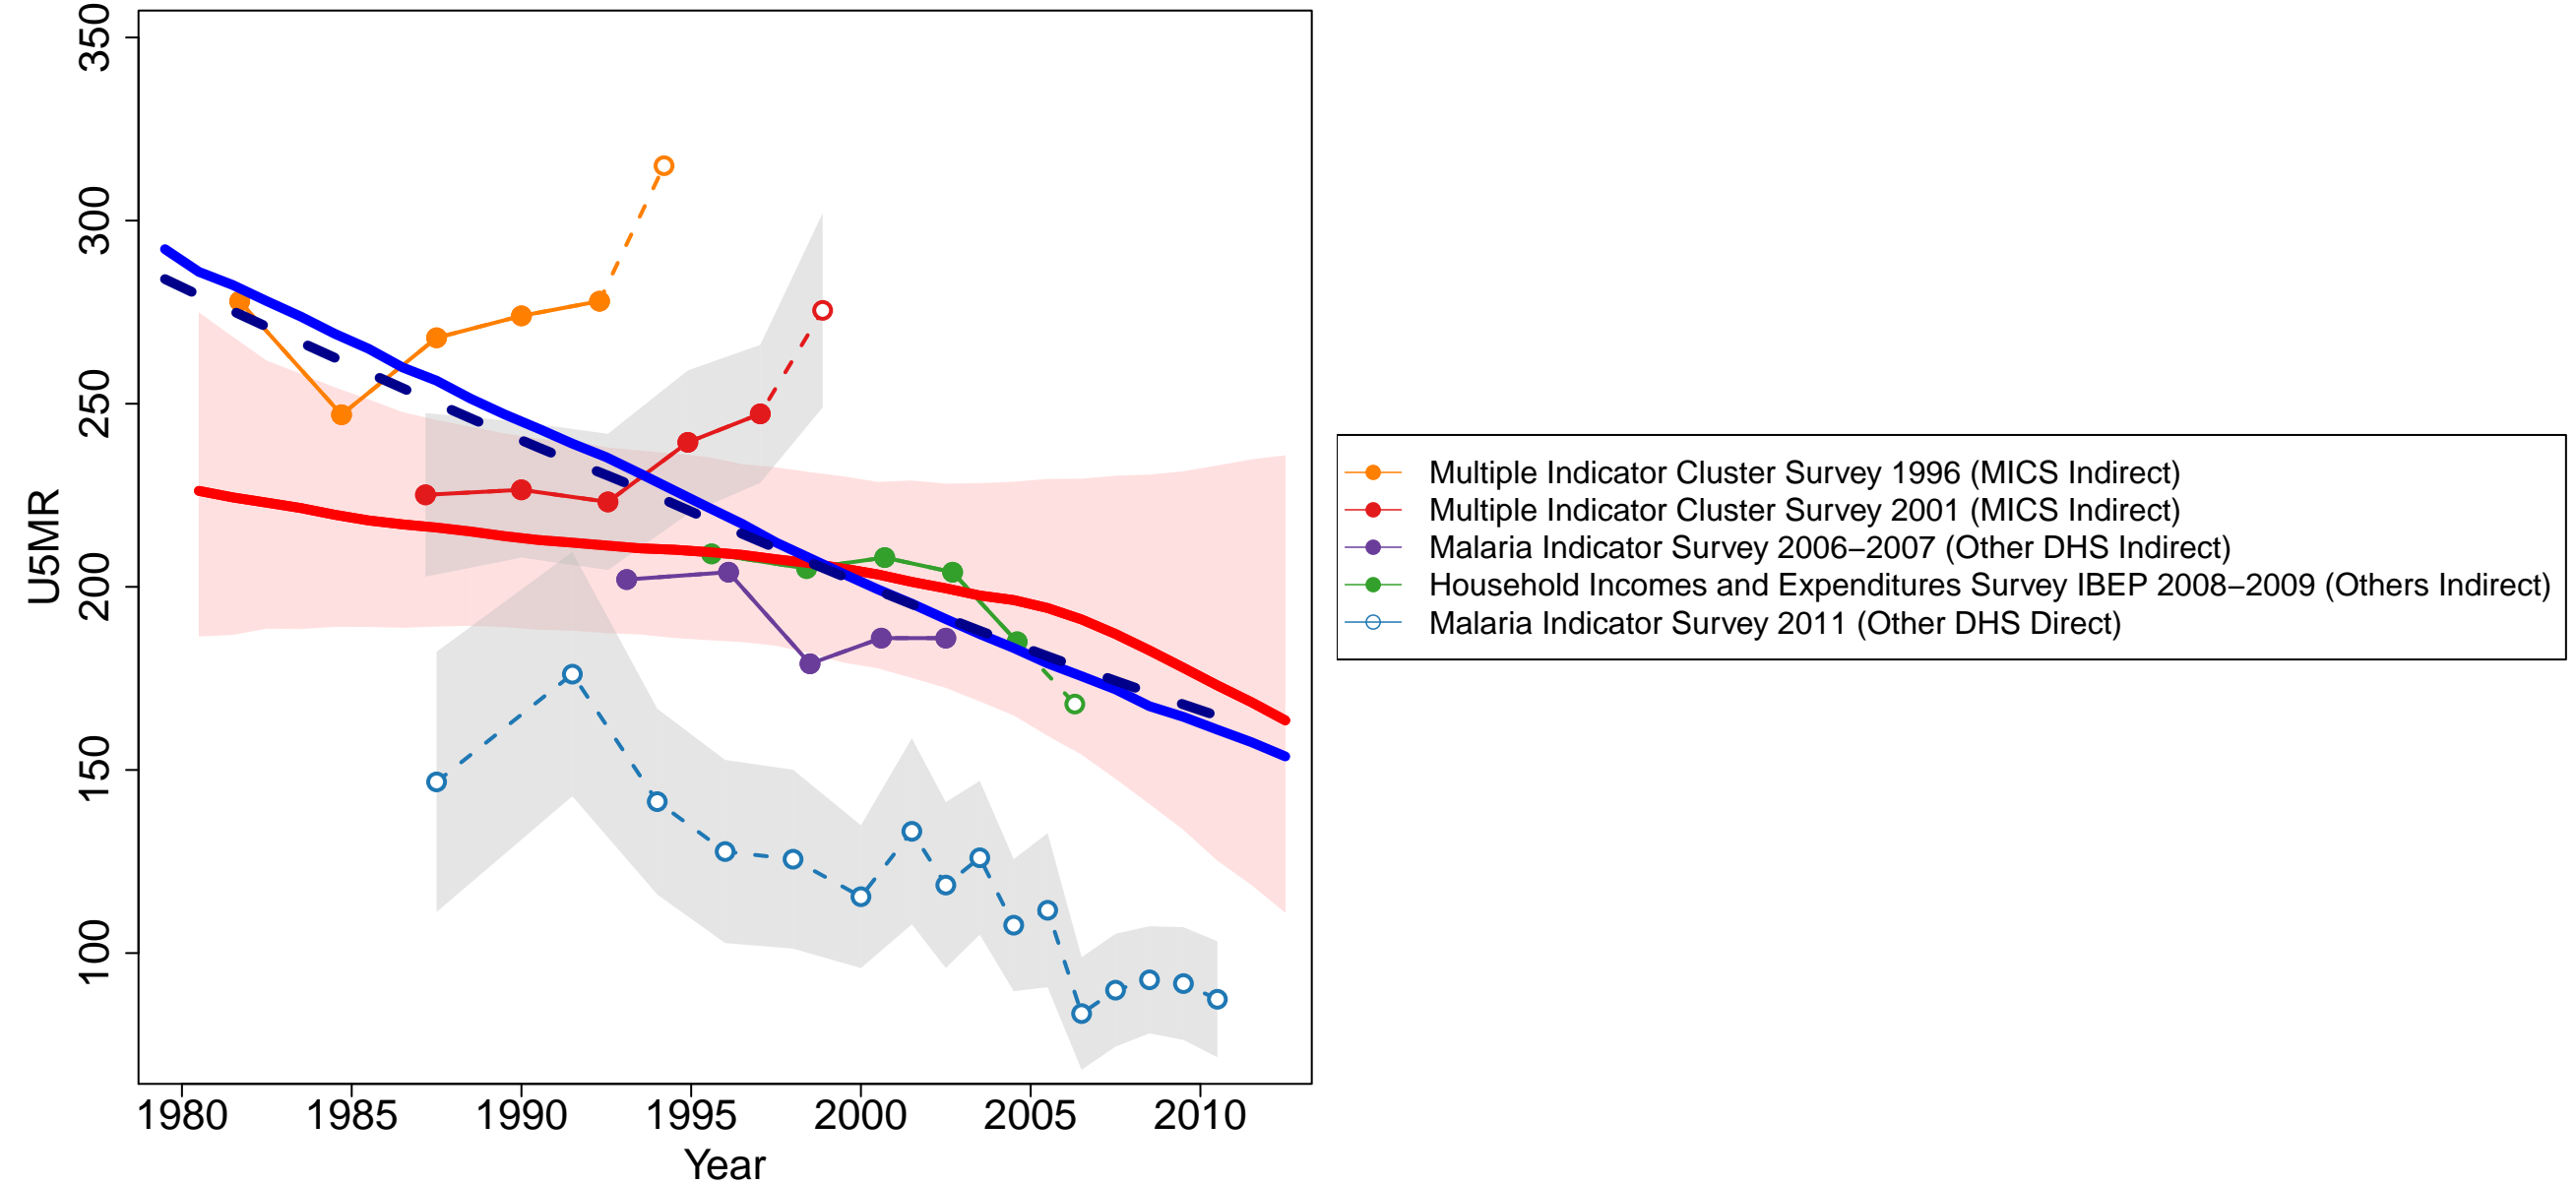

# Antigua & Barbuda

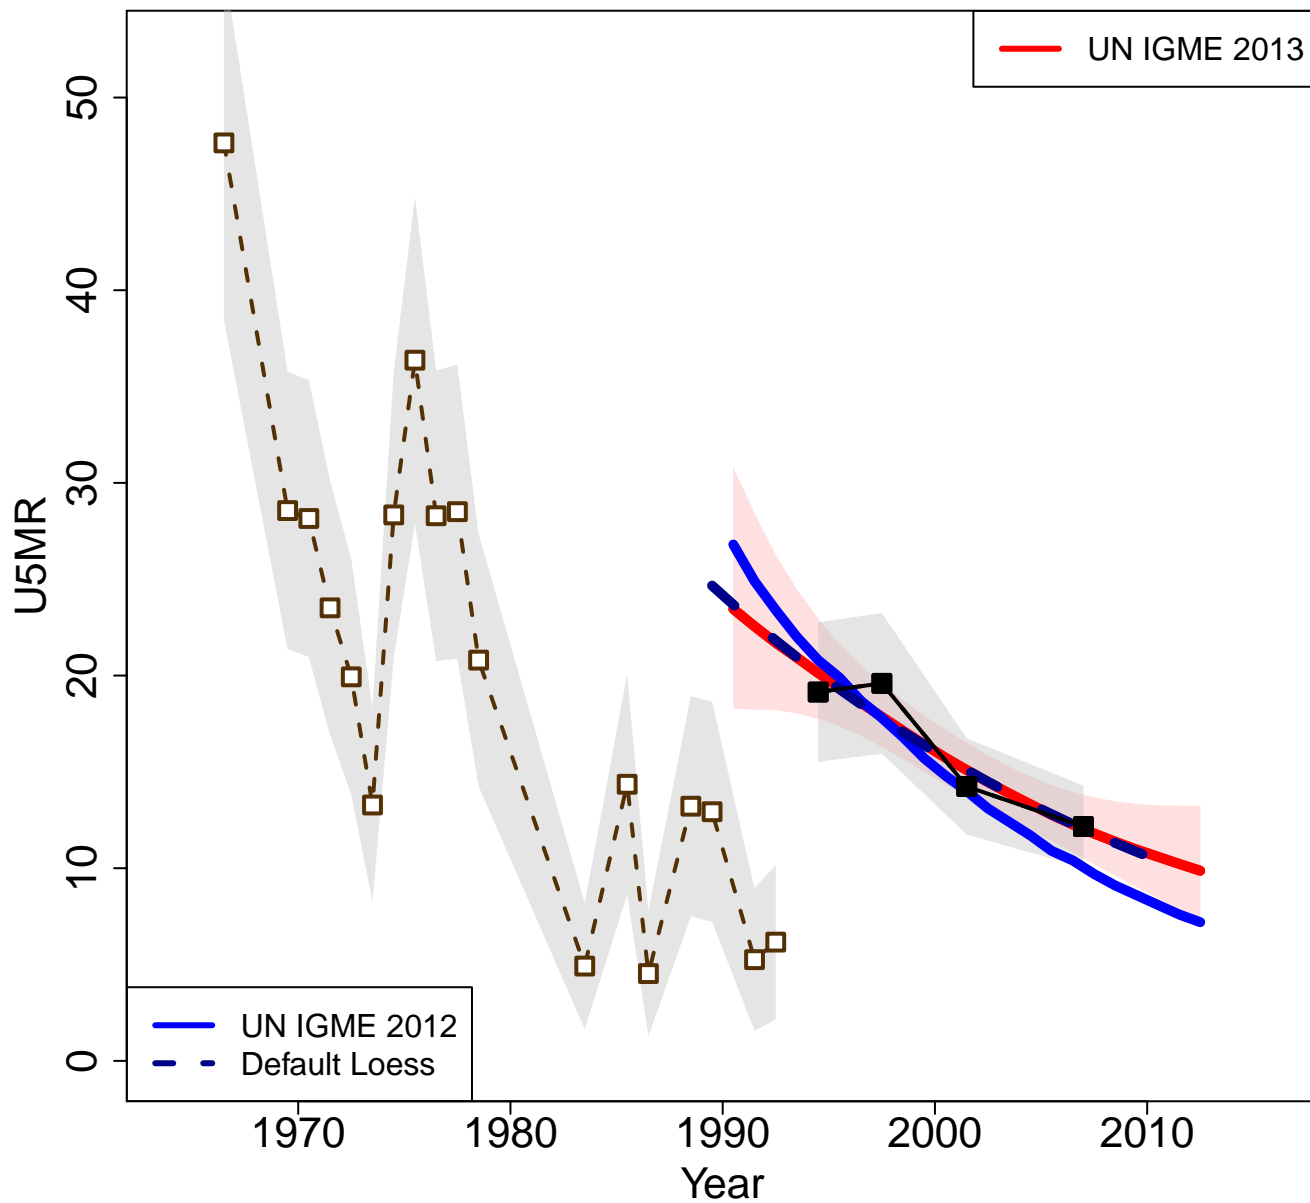

## Zoomed in

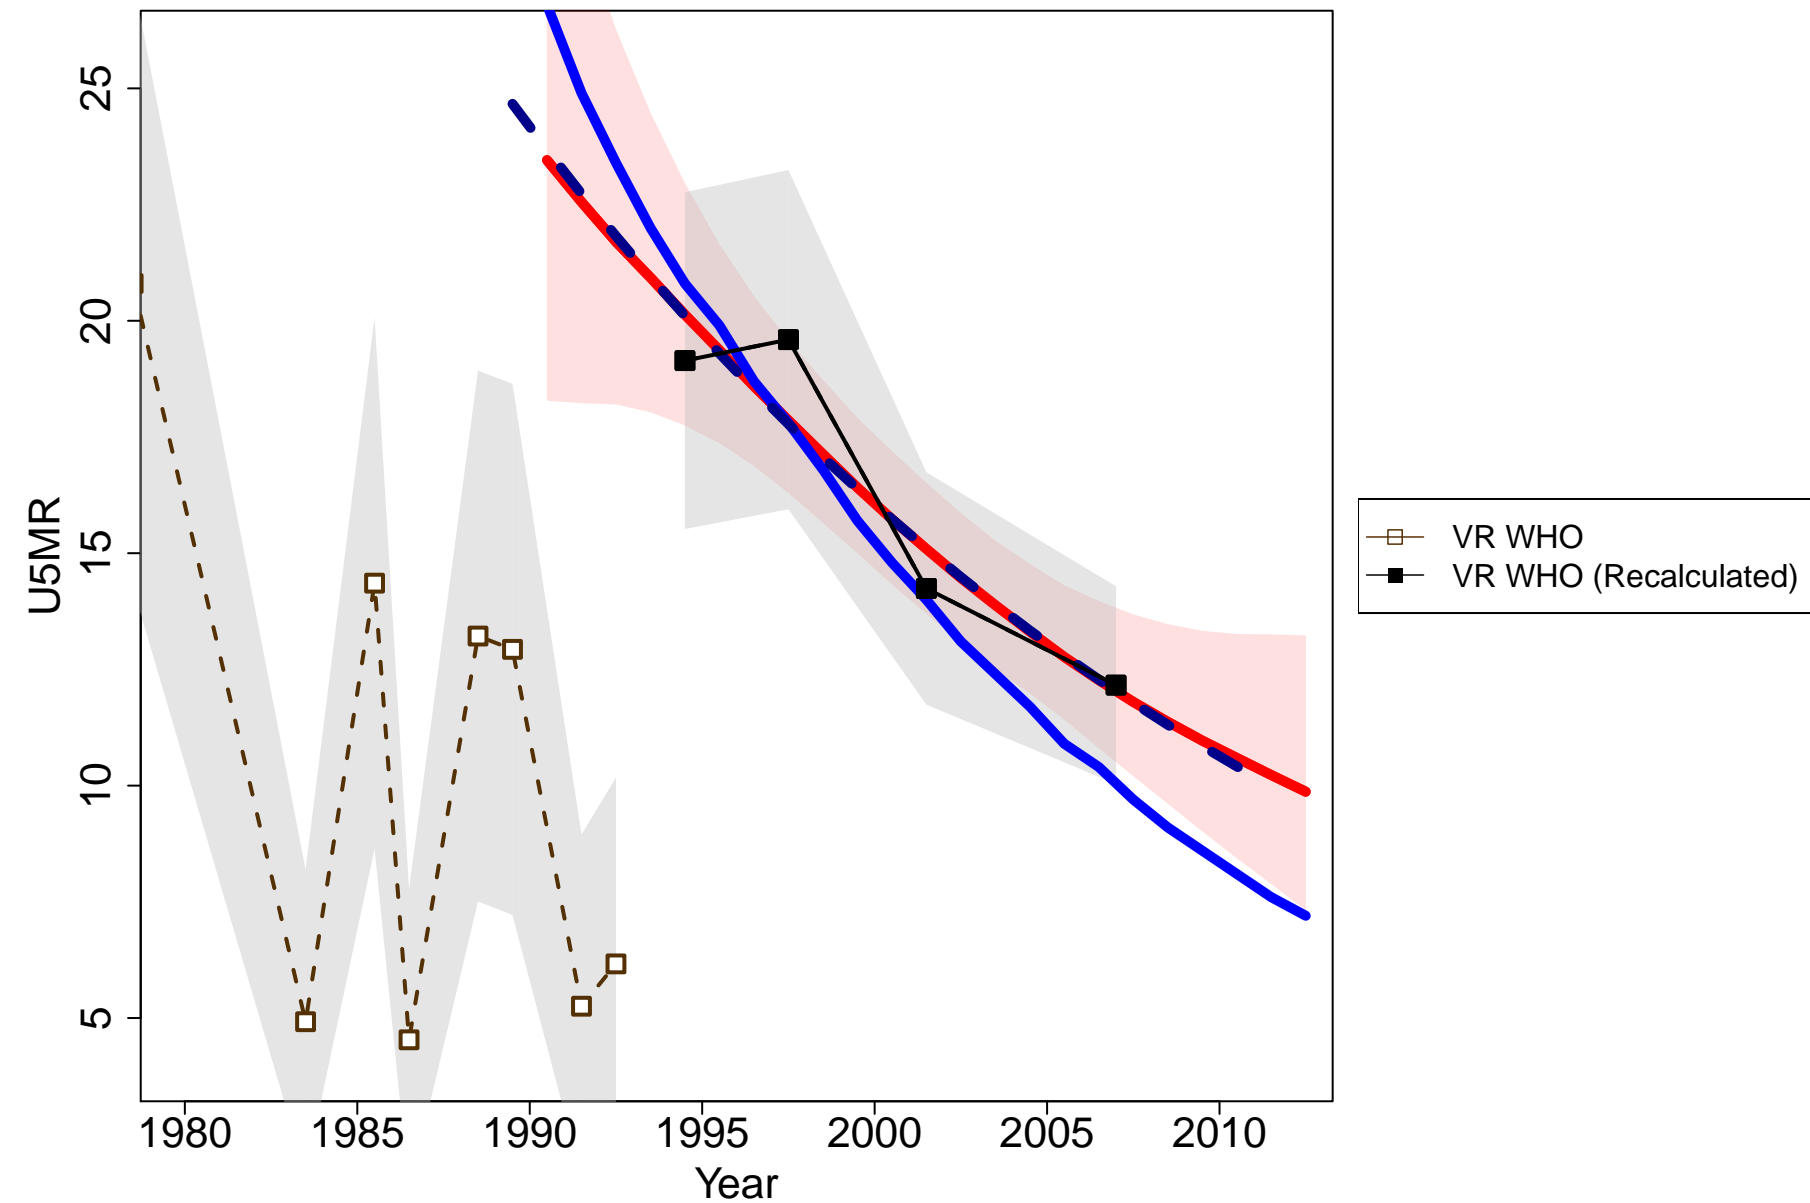

# Armenia

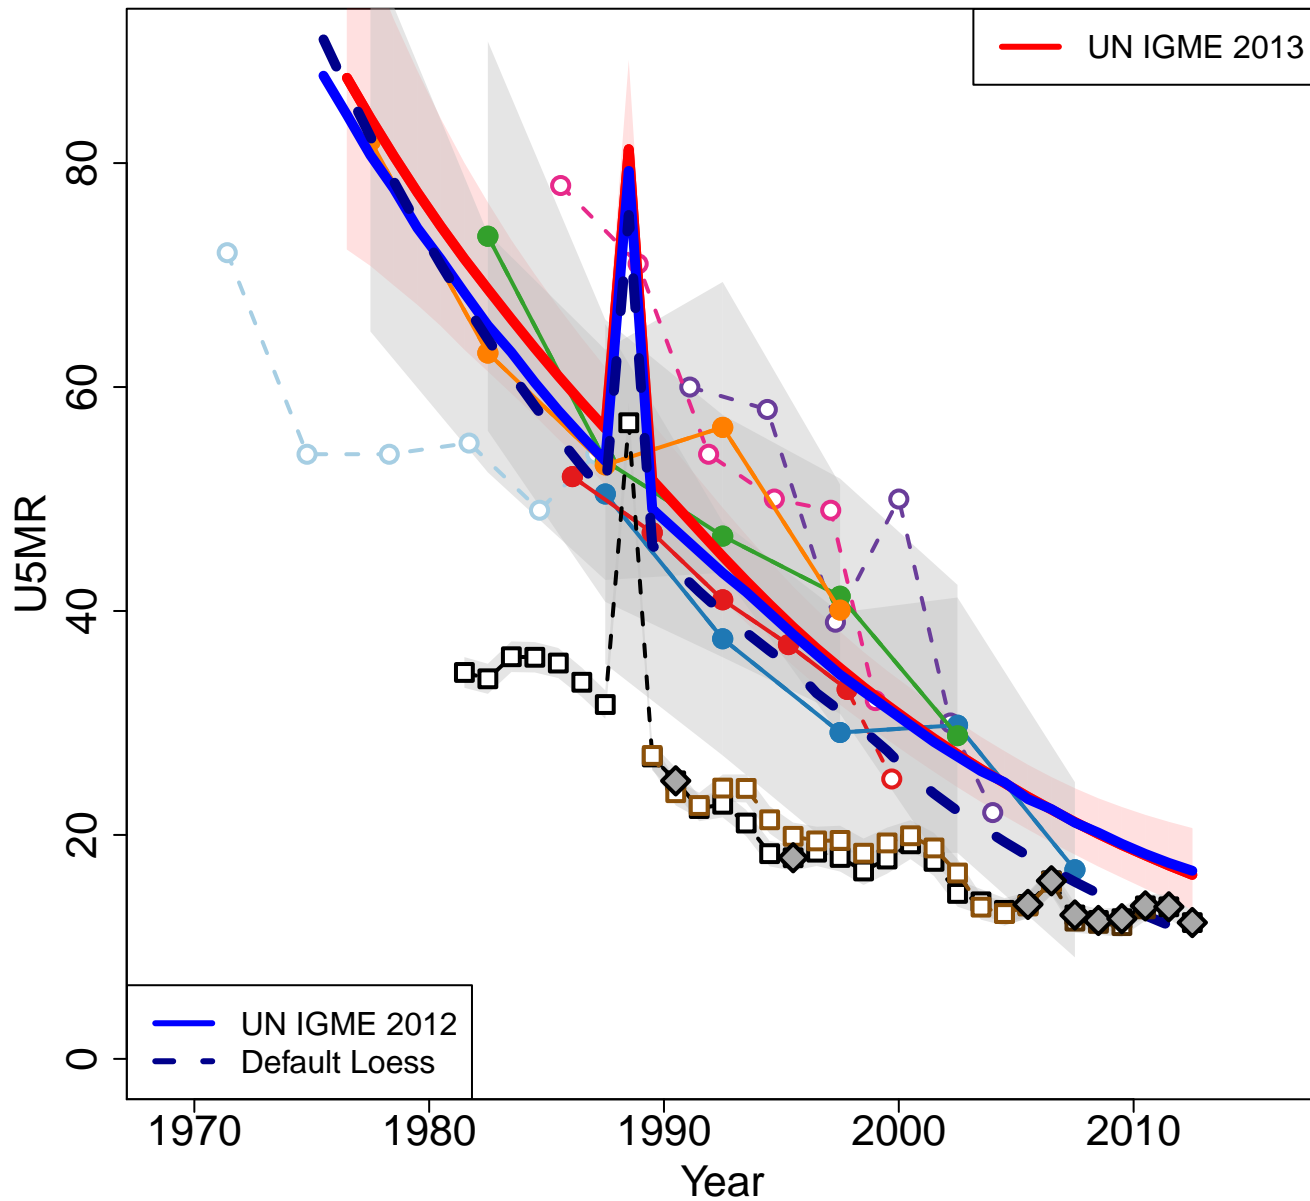

# Zoomed in

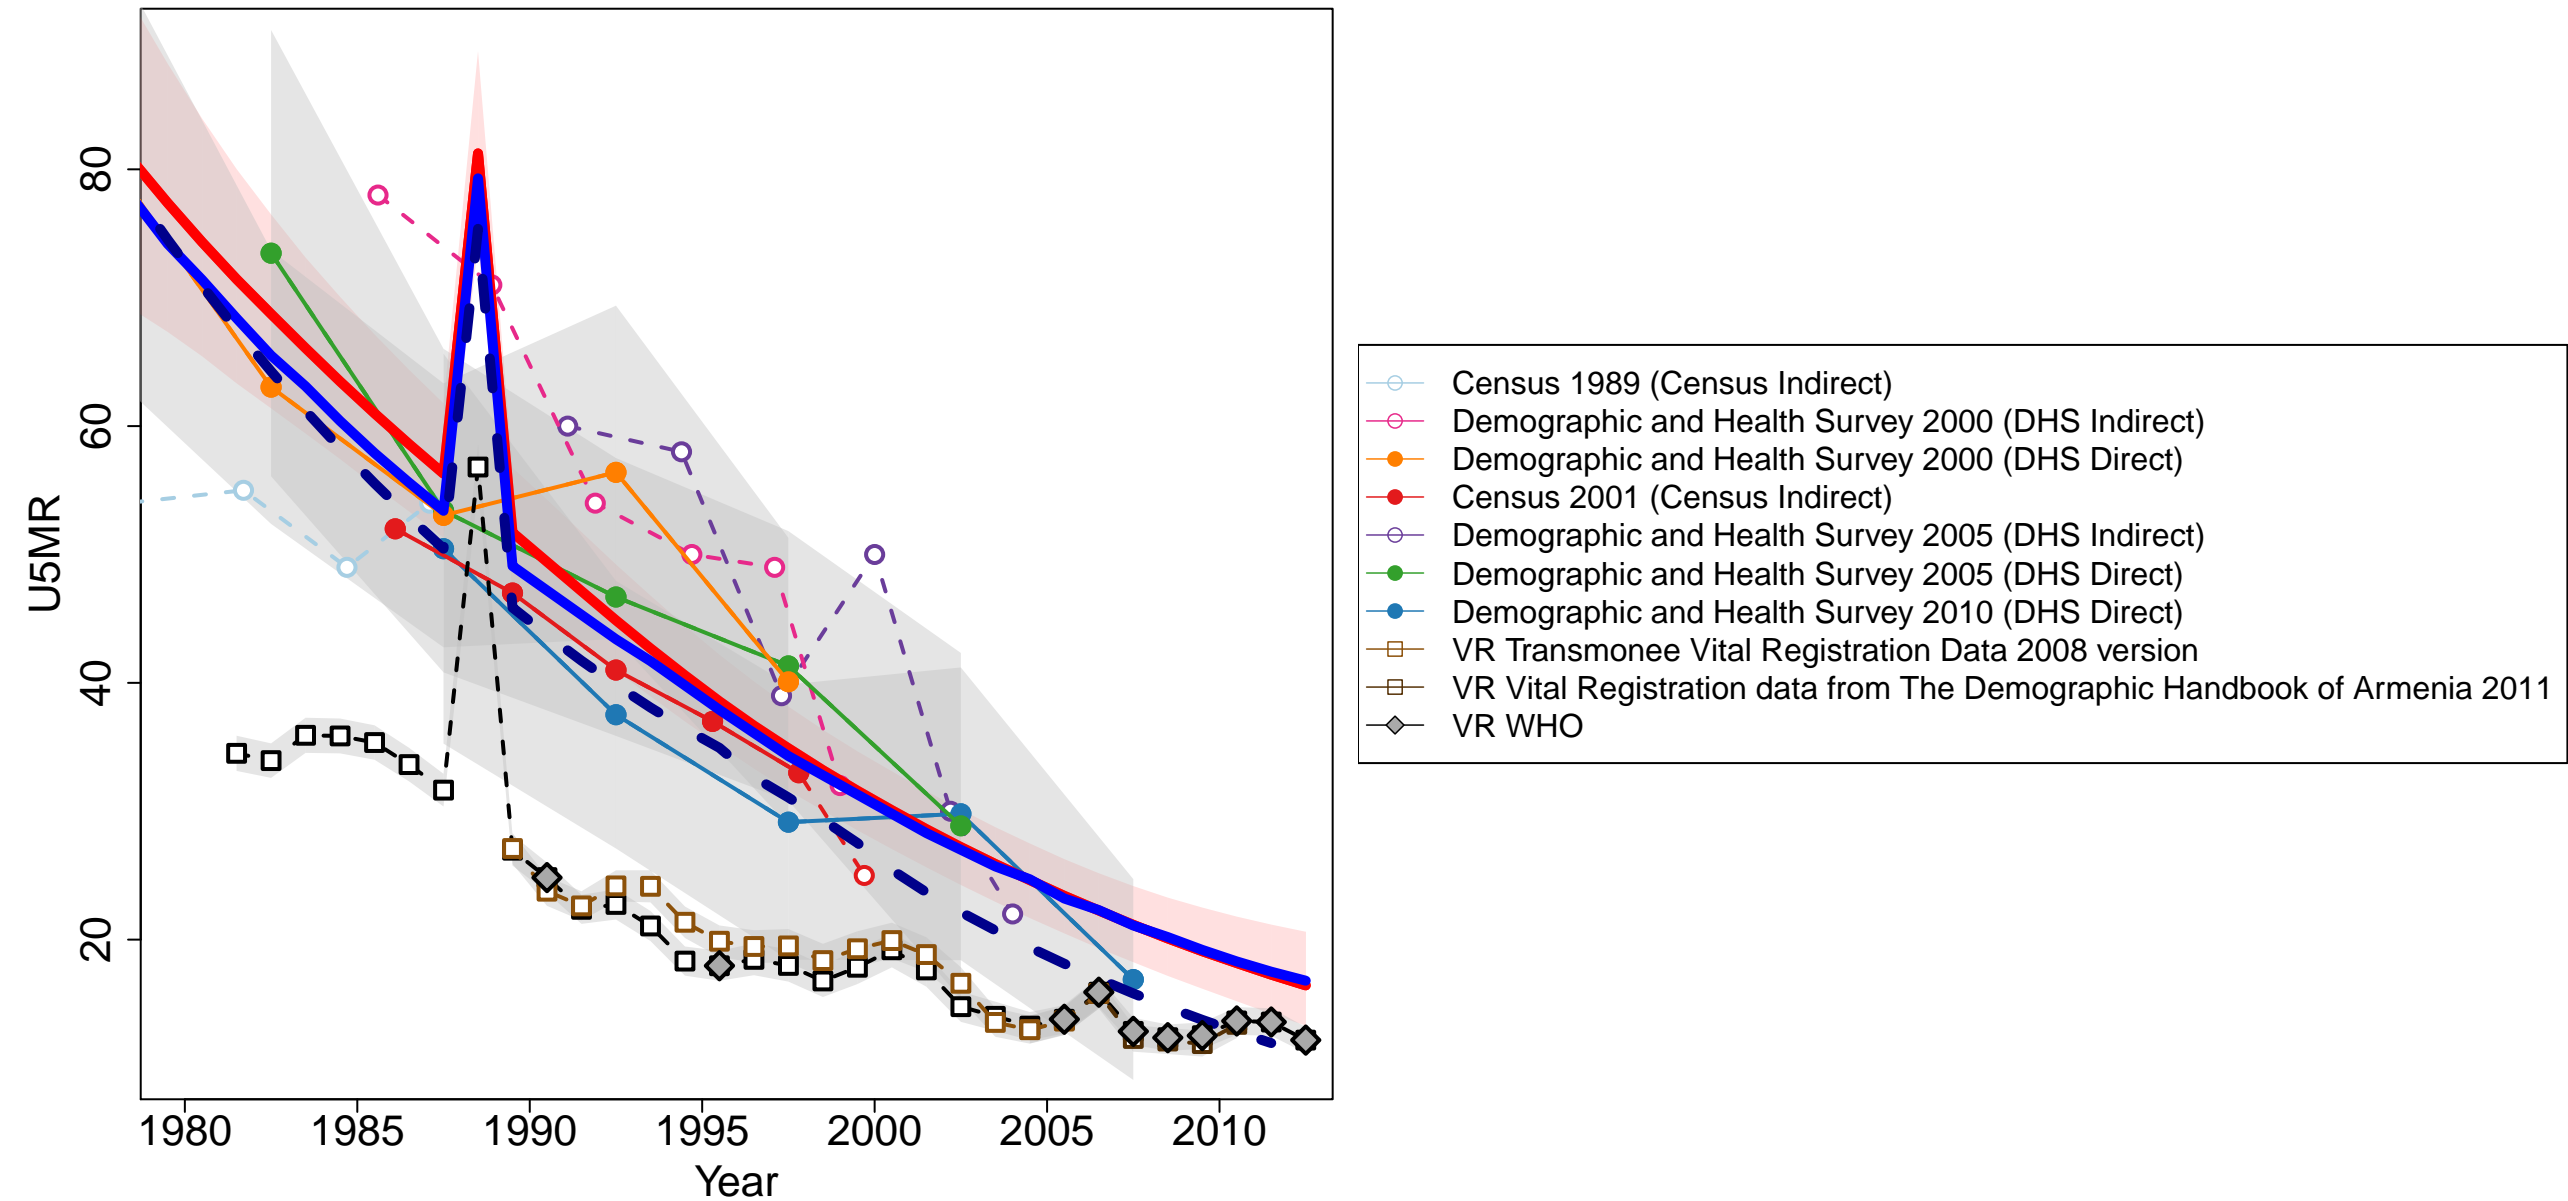

# Azerbaijan

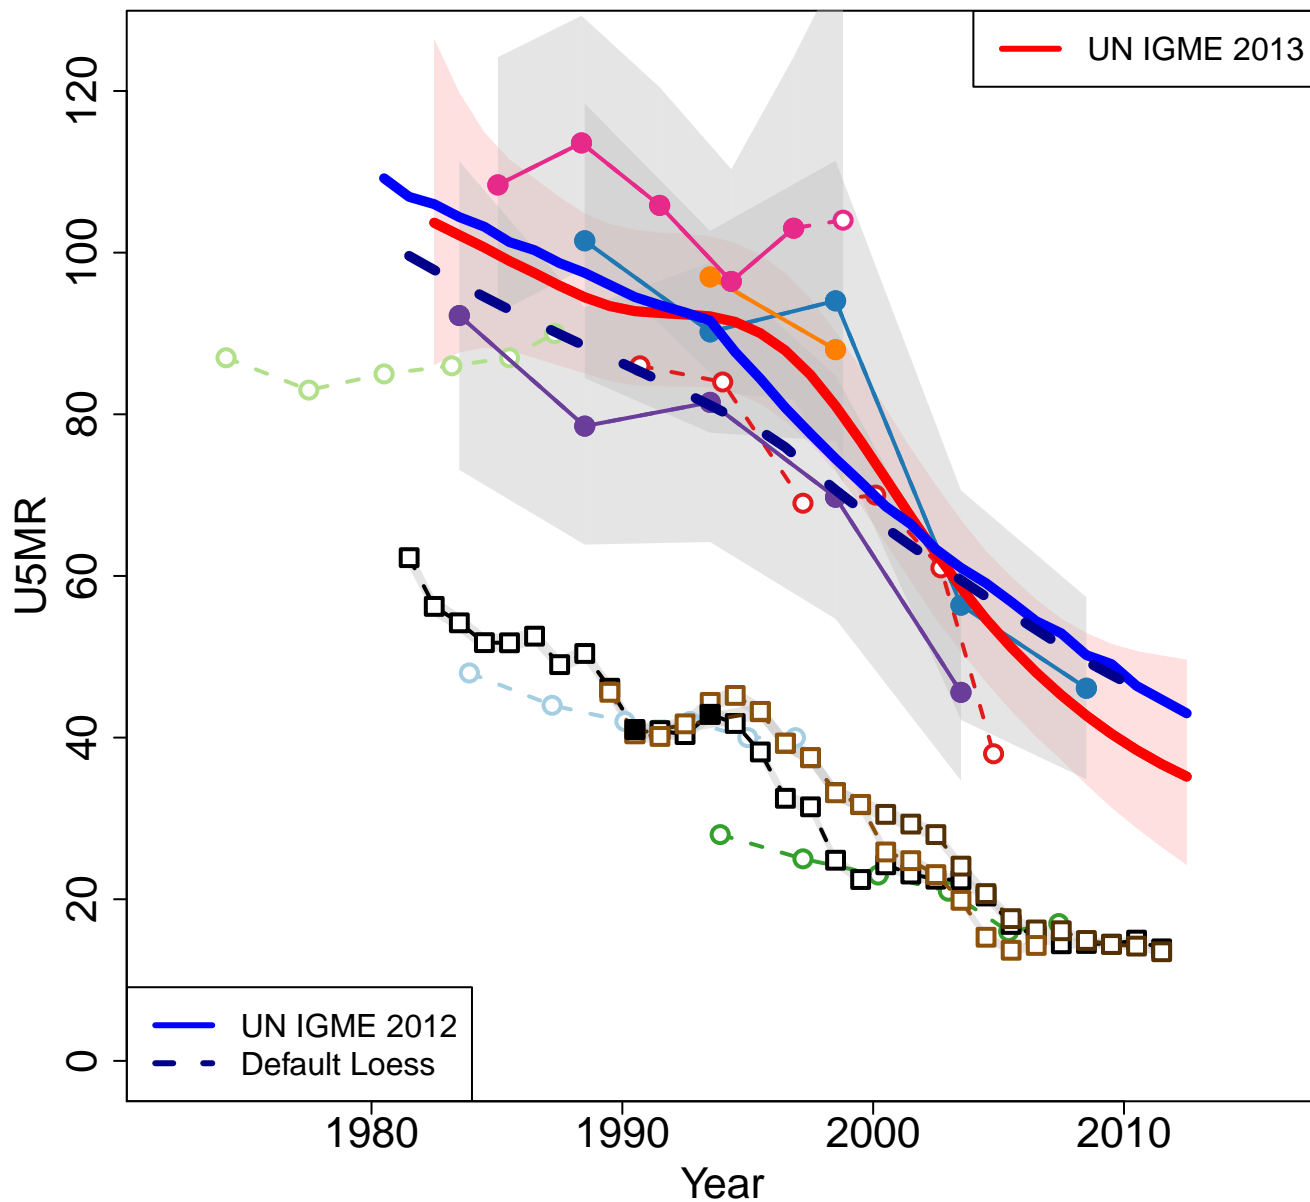

# Zoomed in

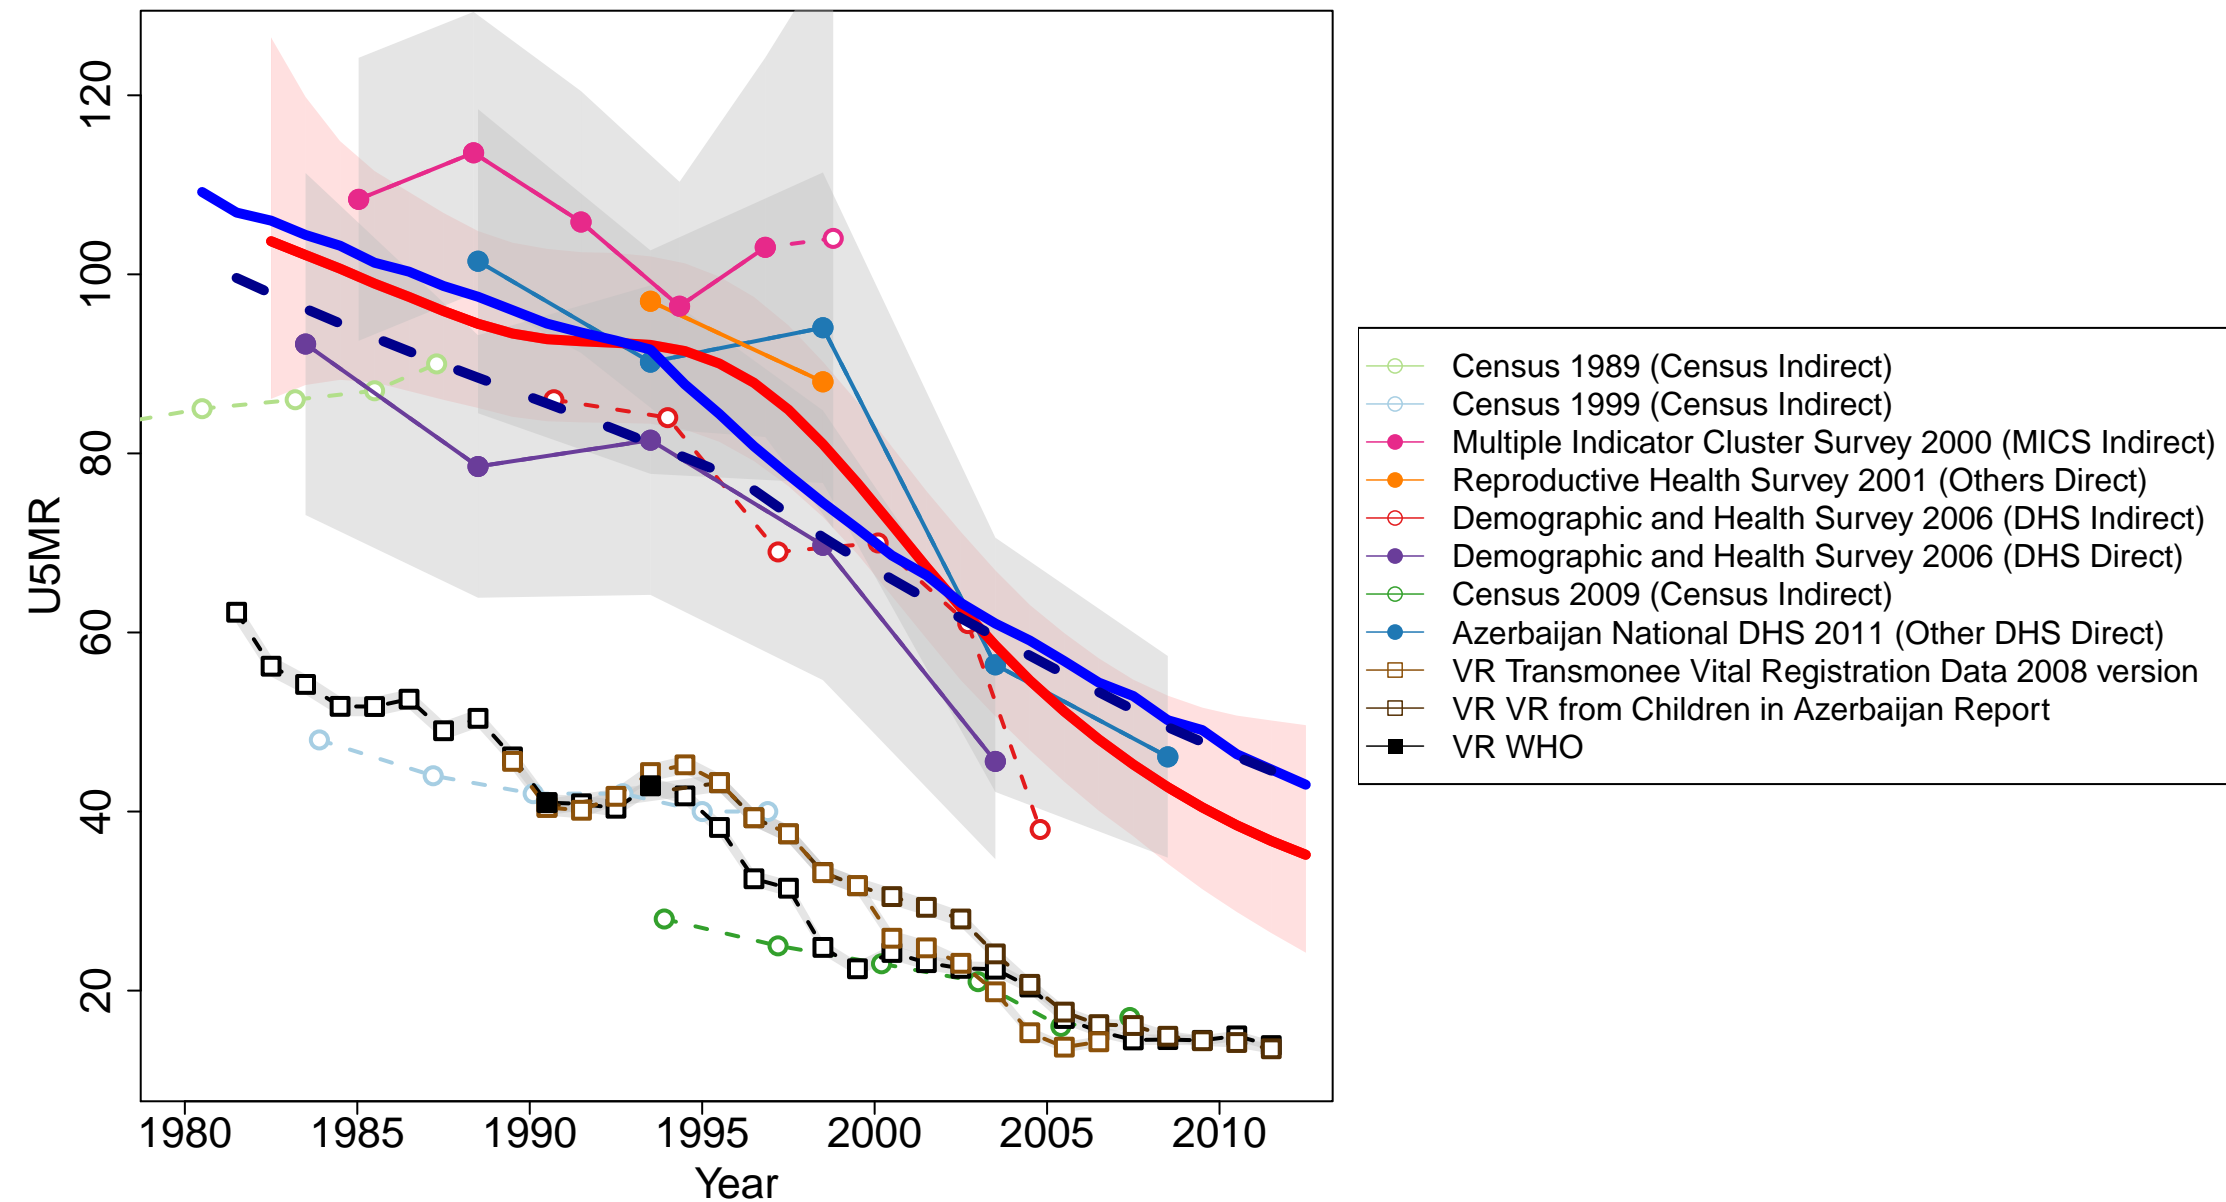



# Bahamas

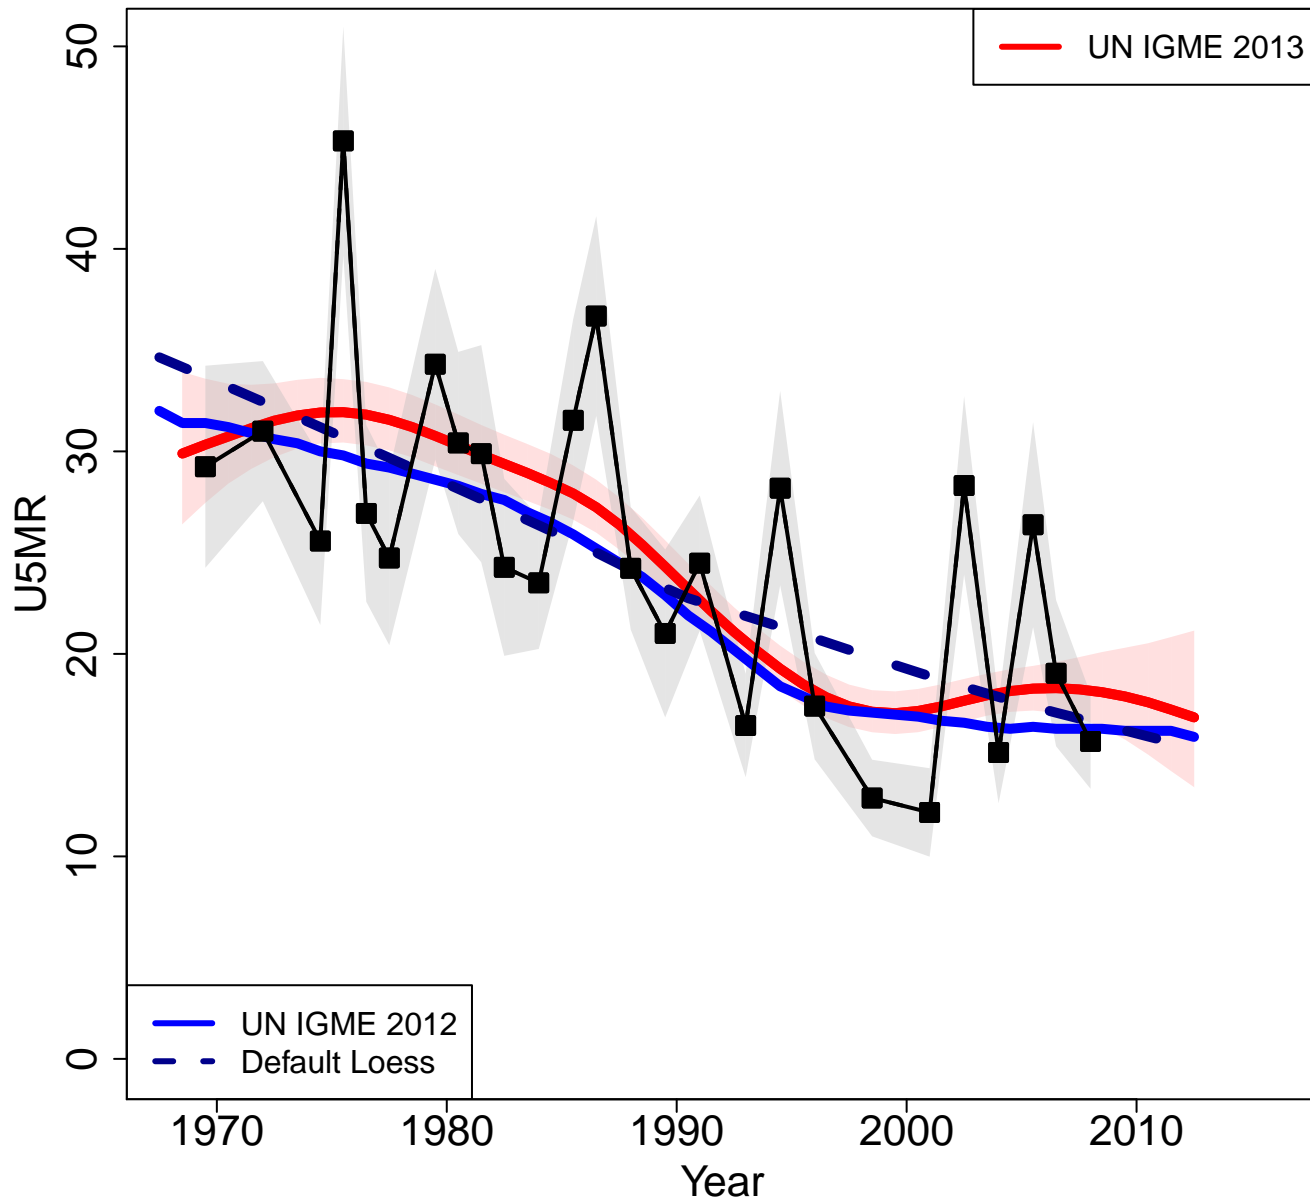

# Zoomed in

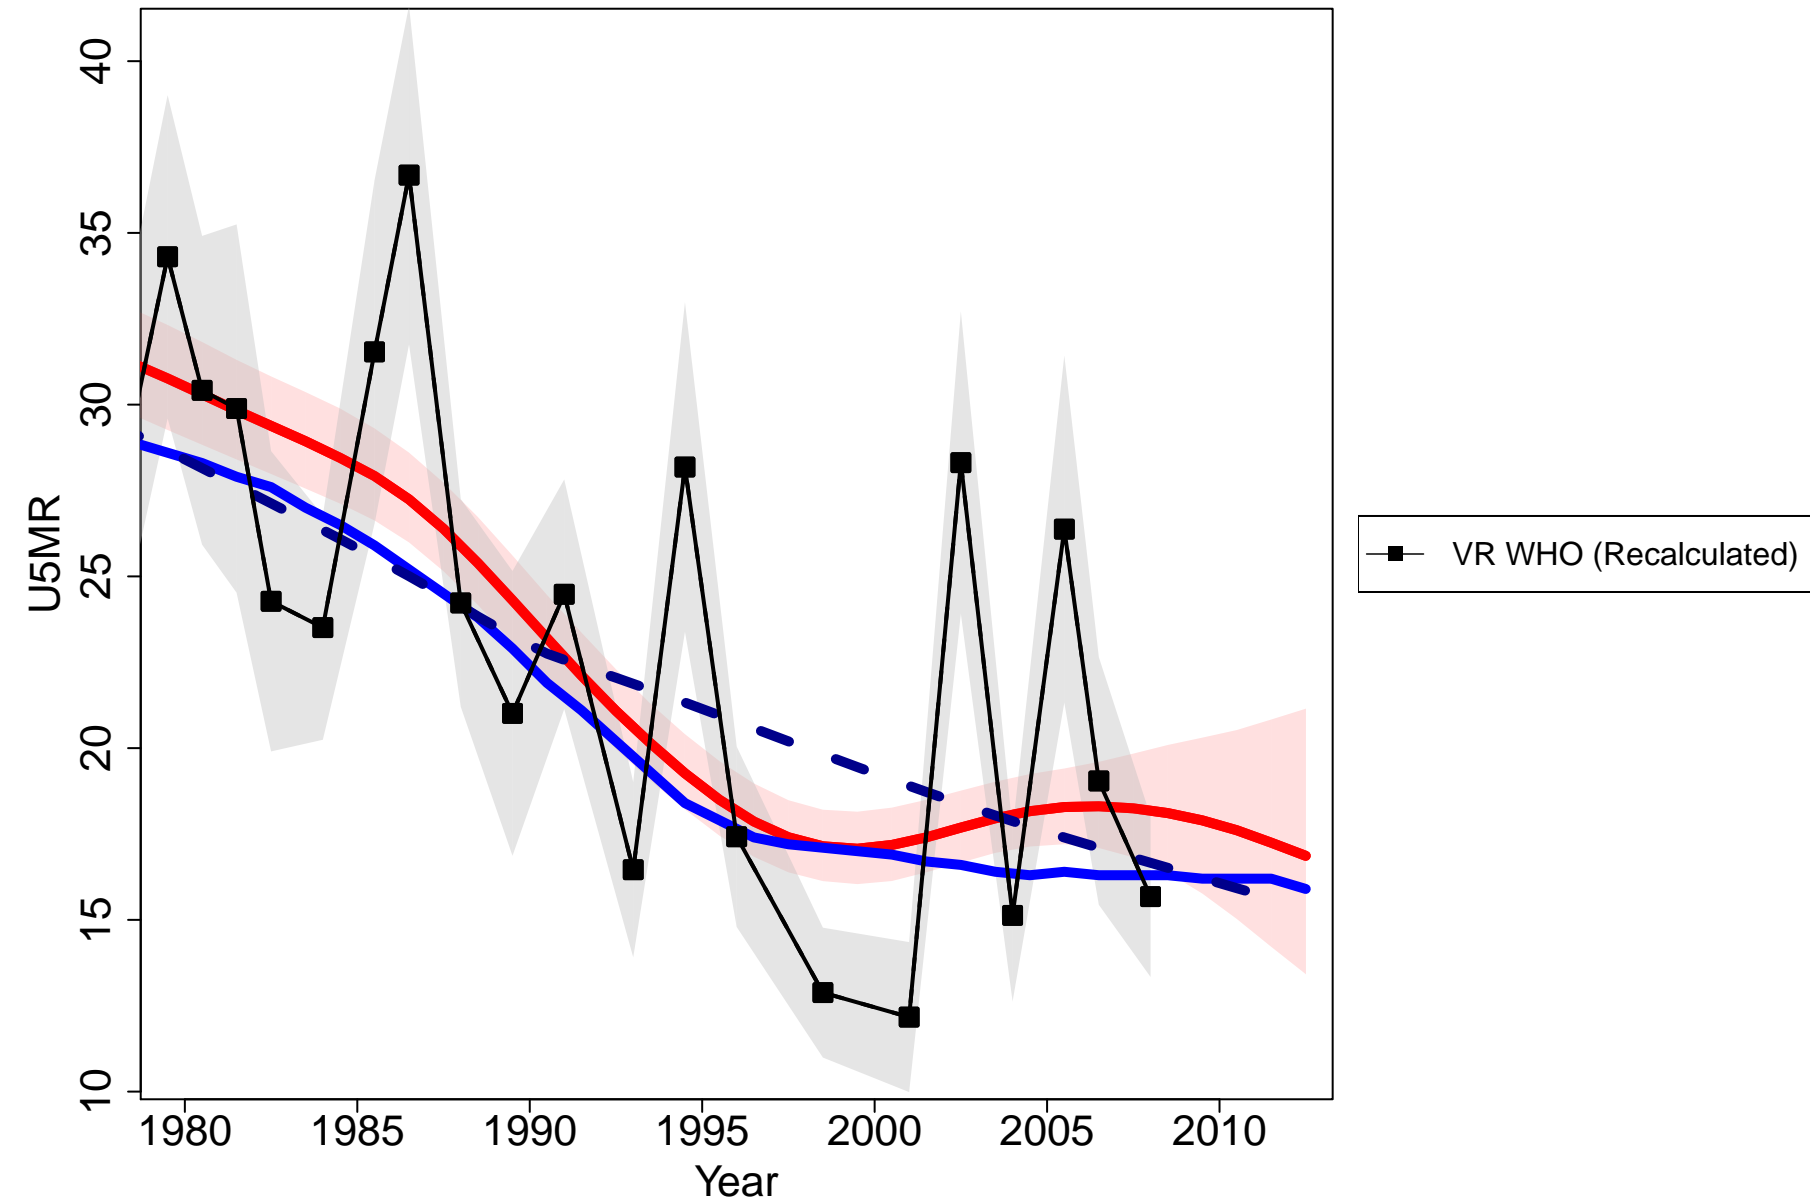

# Bahrain

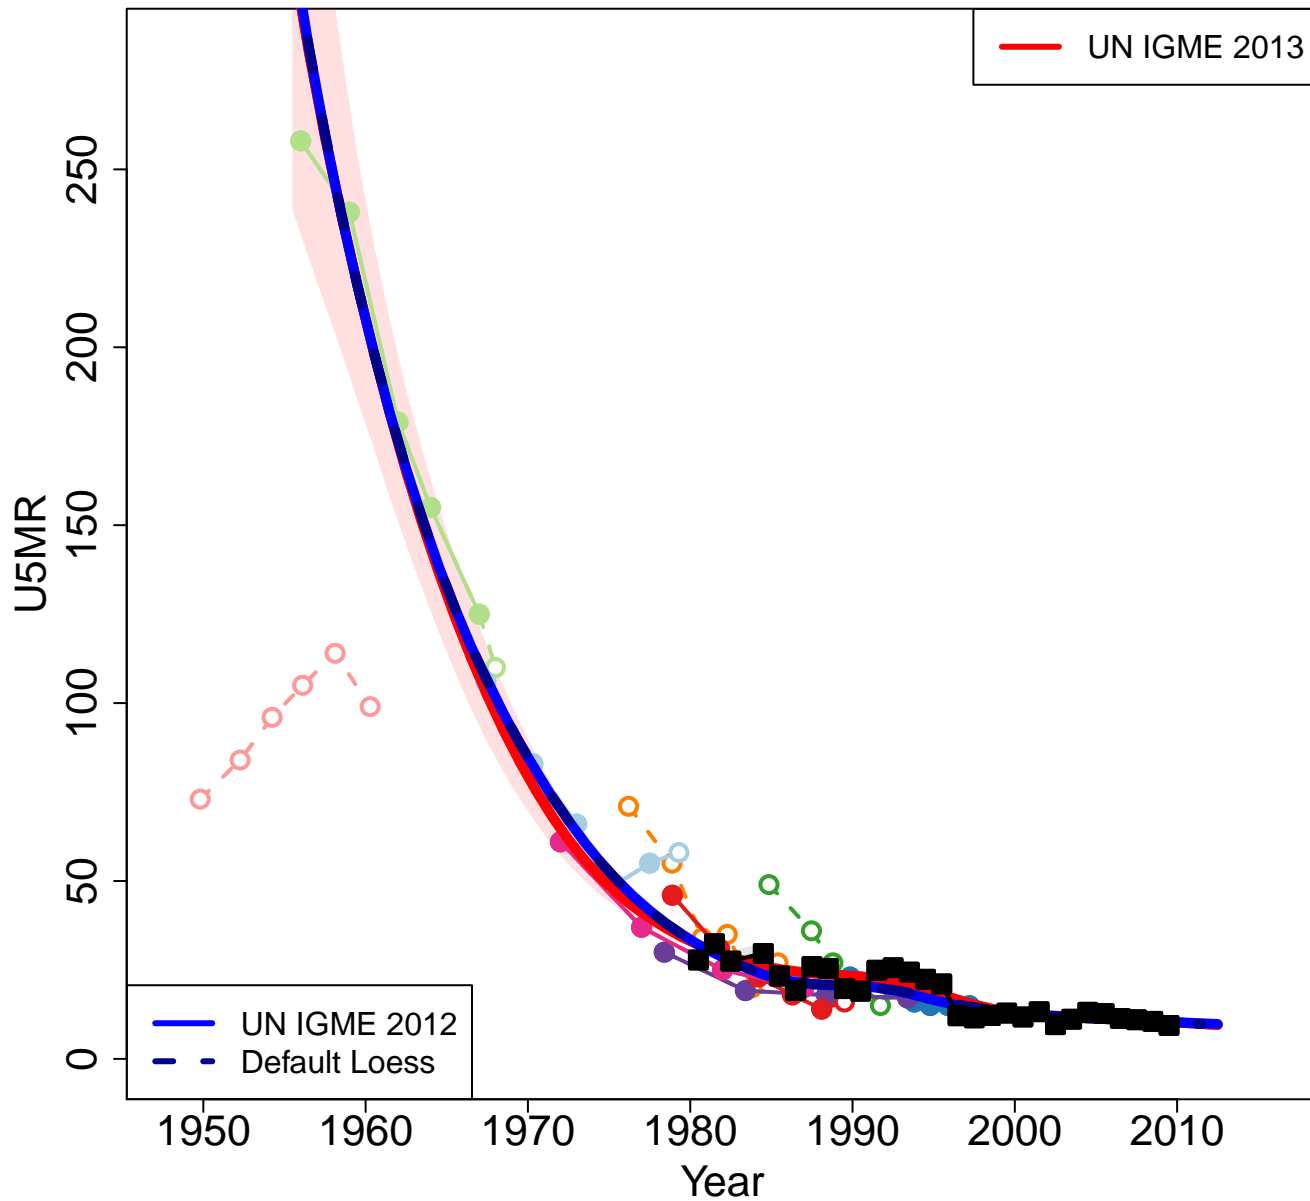

# Zoomed in

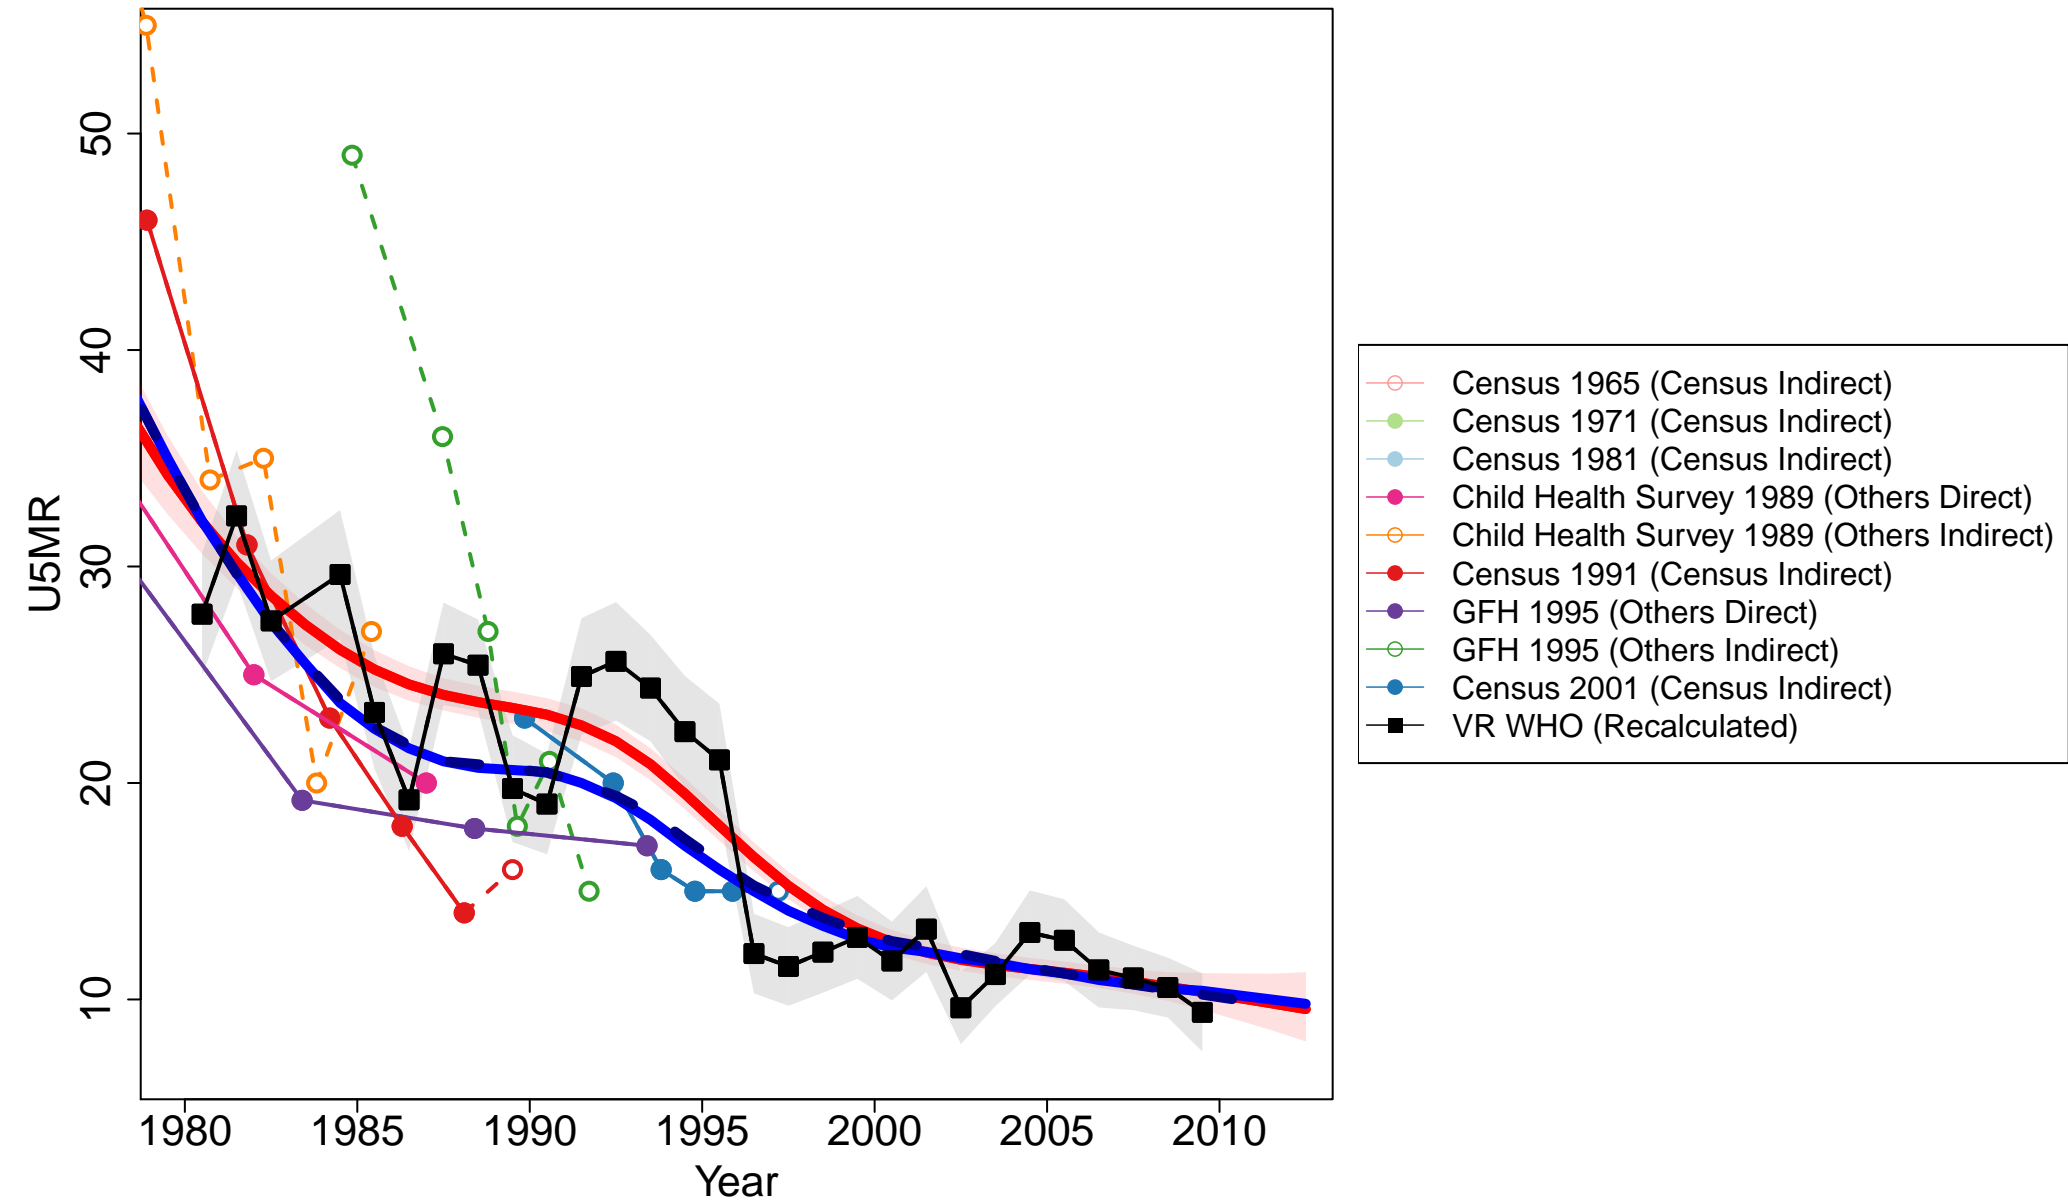

# Bangladesh

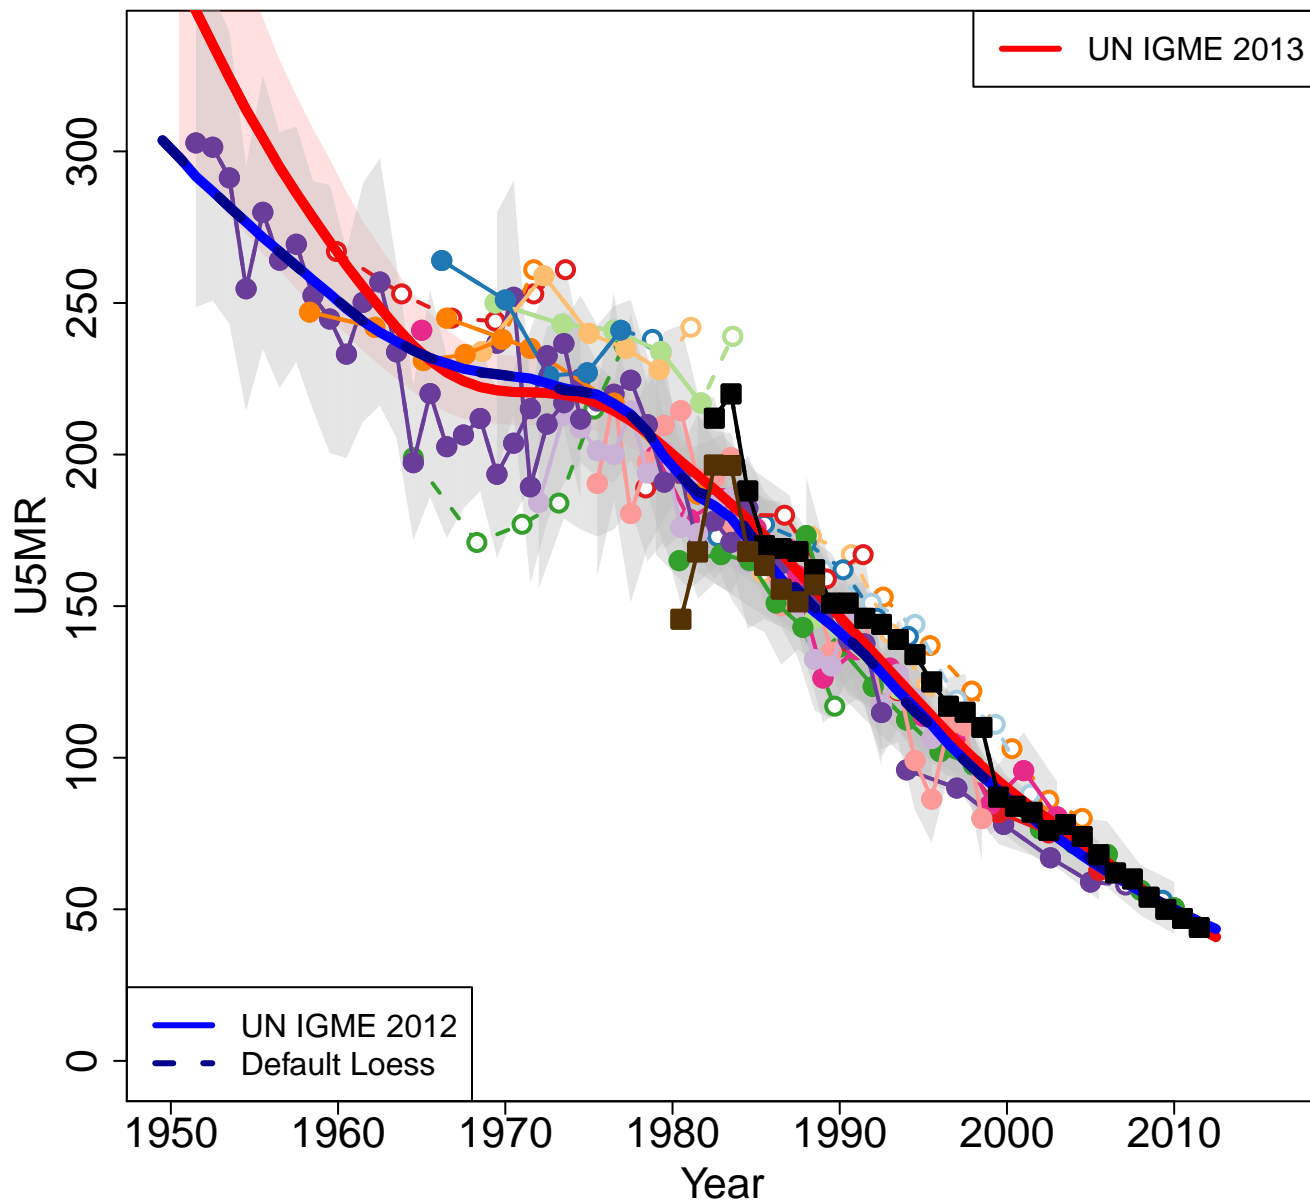

# Zoomed in

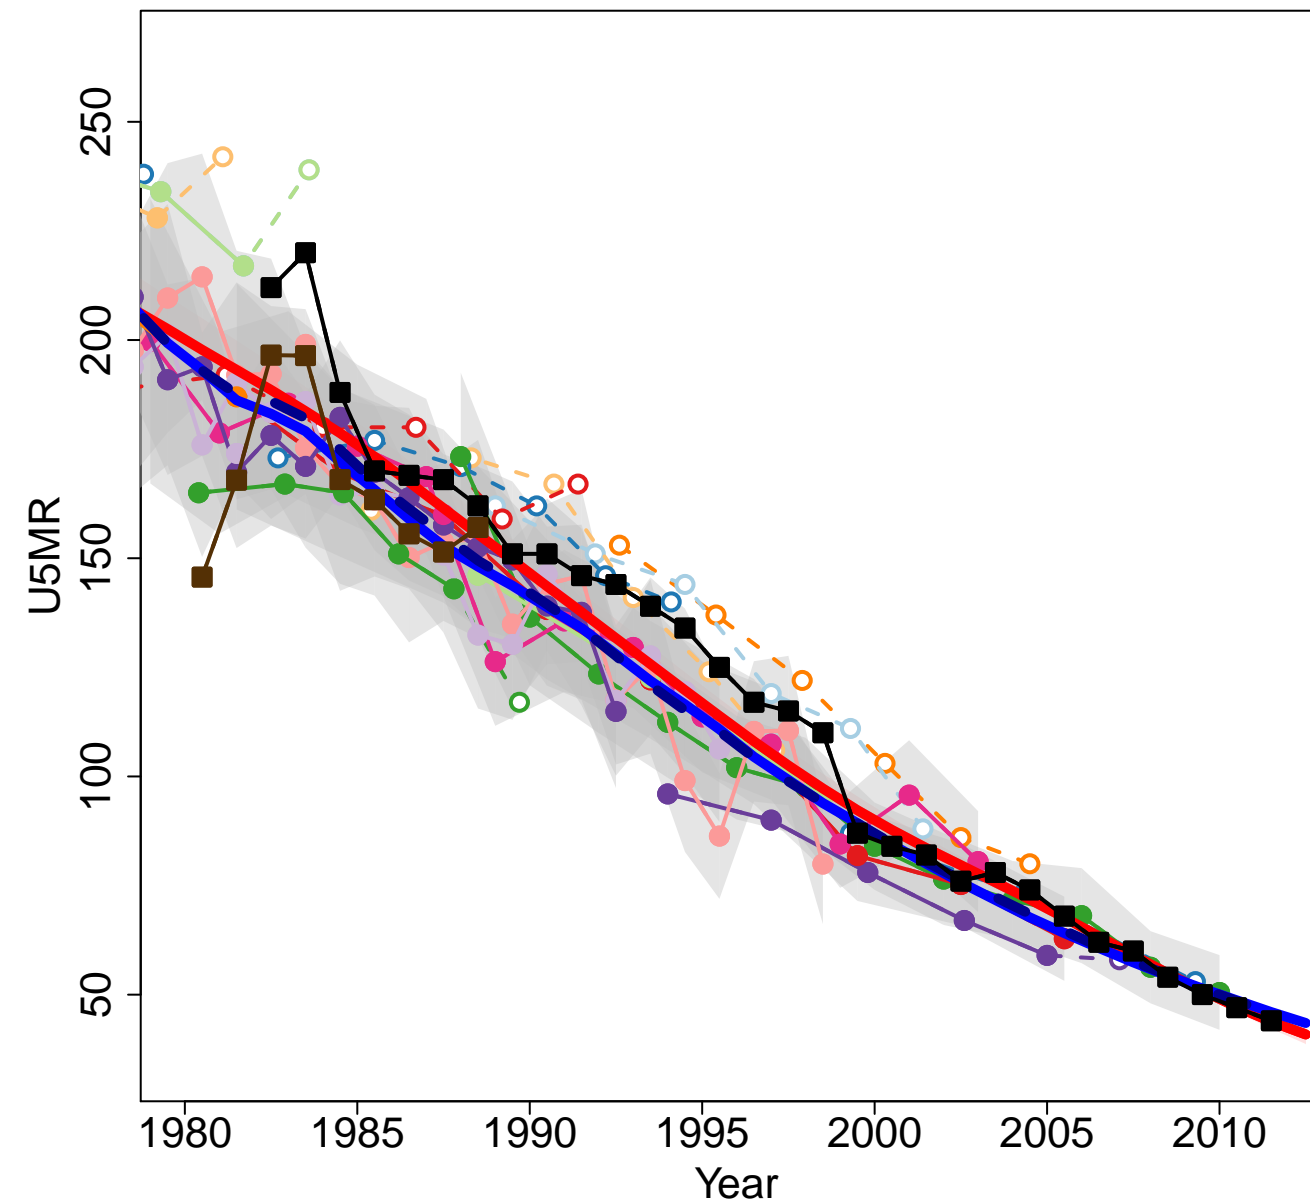

- Population Growth Estimation Experiment 1965 (Others Direct)
- Retrospective Fertility and Mortality Survey (UN SA) 1974 (Others Indirect)
- World Fertility Survey 1975–1976 (Other DHS Indirect)
- World Fertility Survey 1975–1976 (Other DHS Direct)
- Contraceptive Prevalence Survey 1979–1980 (Others Indirect)
- Contraceptive Prevalence Survey 1981 (Others Indirect)
- National Life Tables 1981 (Others Life Table)
- Contraceptive Prevalence Survey 1983–1984 (Others Indirect)
- National Life Tables 1983 (Others Life Table)
- Contraceptive Prevalence Survey 1985–1986 (Others Indirect)
- Contraceptive Prevalence Survey 1986 (Others Indirect)
- National Life Tables 1987 (Others Life Table)
- Fertility Survey 1988–1989 (Others Direct)
- Demographic and Health Survey 1993–1994 (DHS Indirect)
- Demographic and Health Survey 1993–1994 (DHS Direct)
- Health and Demographic Survey 1994 (Others Indirect)
- Demographic and Health Survey 1996–1997 (DHS Indirect)
- Demographic and Health Survey 1996–1997 (DHS Direct)
- Demographic and Health Survey 1999–2000 (DHS Indirect)
- Demographic and Health Survey 1999–2000 (DHS Direct)
- Maternal Health Services and Maternal Mortality Survey 2001 (Other DHS Direct)
- Demographic and Health Survey 2004 (DHS Indirect)
- Demographic and Health Survey 2004 (DHS Direct)
- Demographic and Health Survey 2007 (DHS Indirect)
- Demographic and Health Survey 2007 (DHS Direct)
- Multiple Indicator Cluster Survey 2009 (Others Indirect)
- Demographic and Health Survey 2011 (DHS Direct)
- Demographic and Health Survey (Preliminary) 2011 (DHS Direct)
- VR Bangladesh Demographic Survey and Vital Registration
- SVR SVR from Report on Sample Vital Registration System 2010

# Barbados

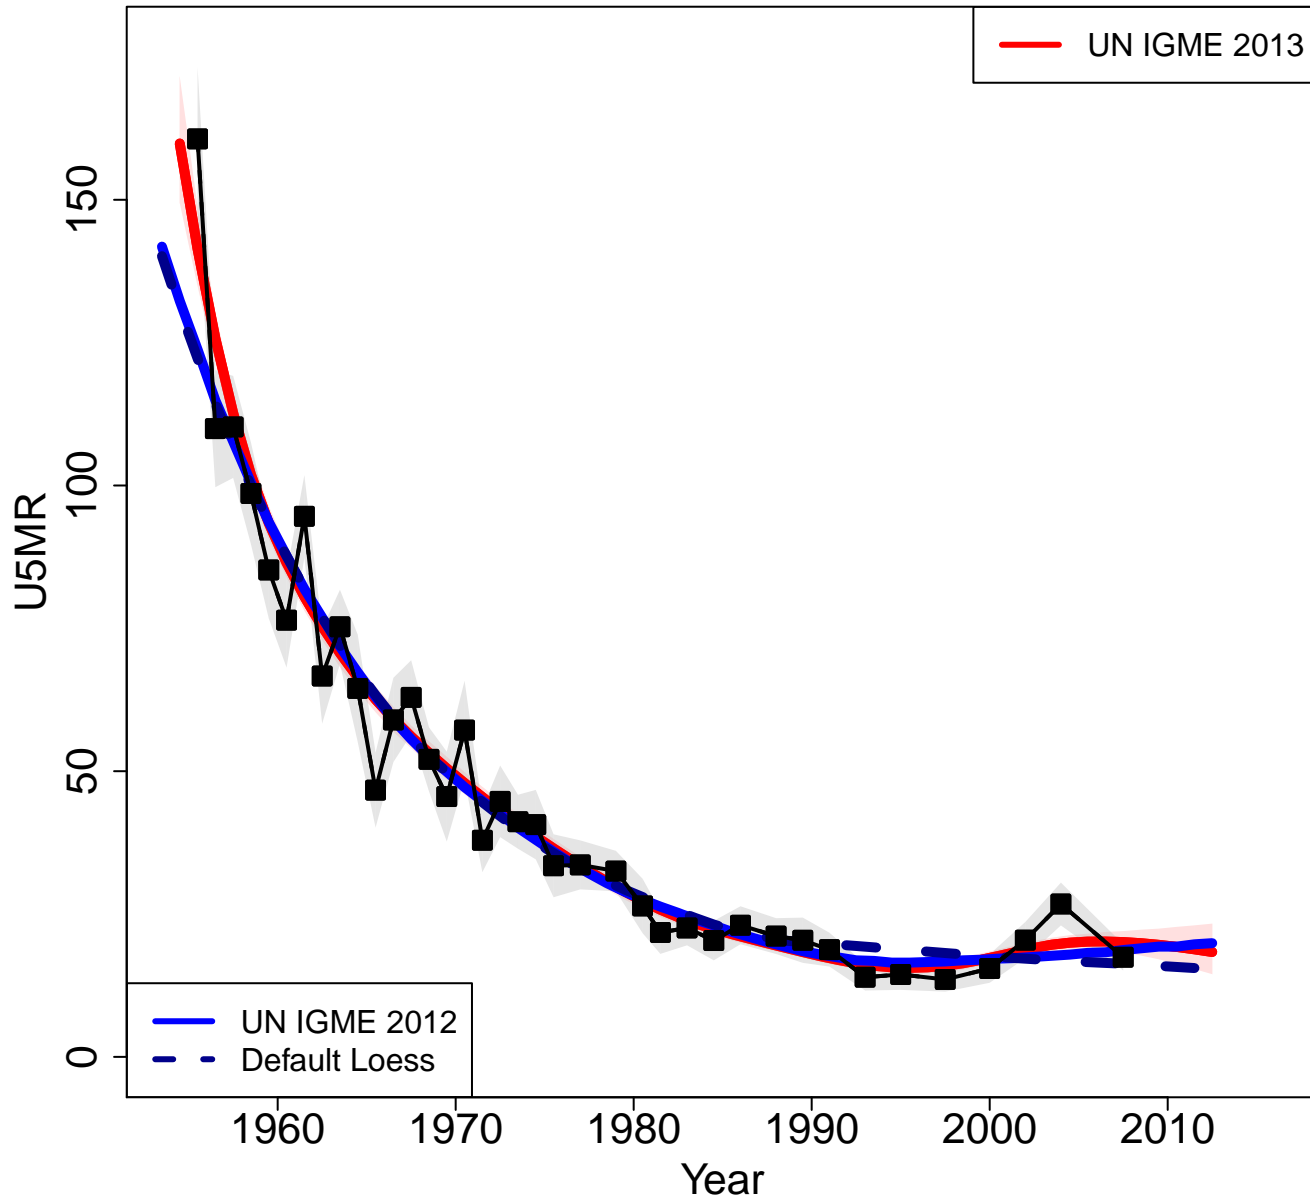

# Zoomed in

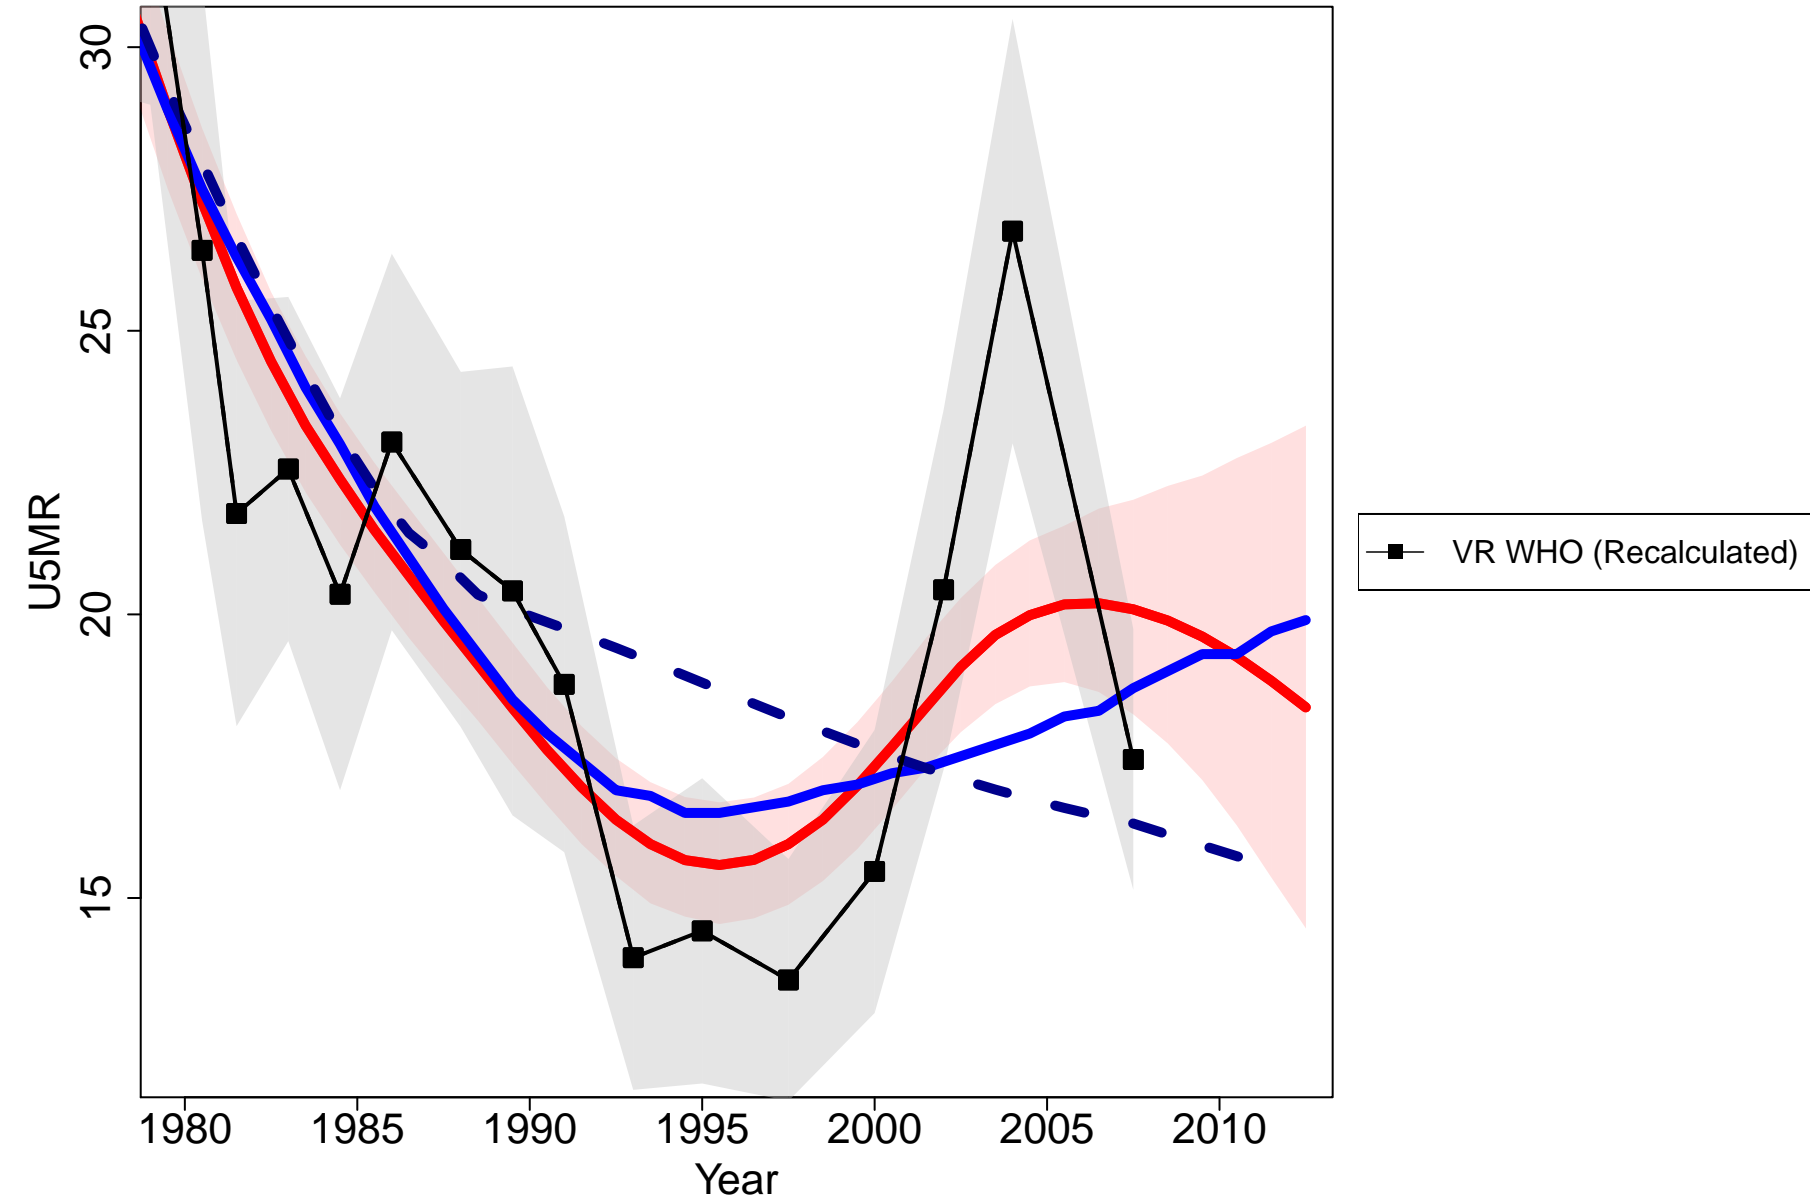

# Belarus

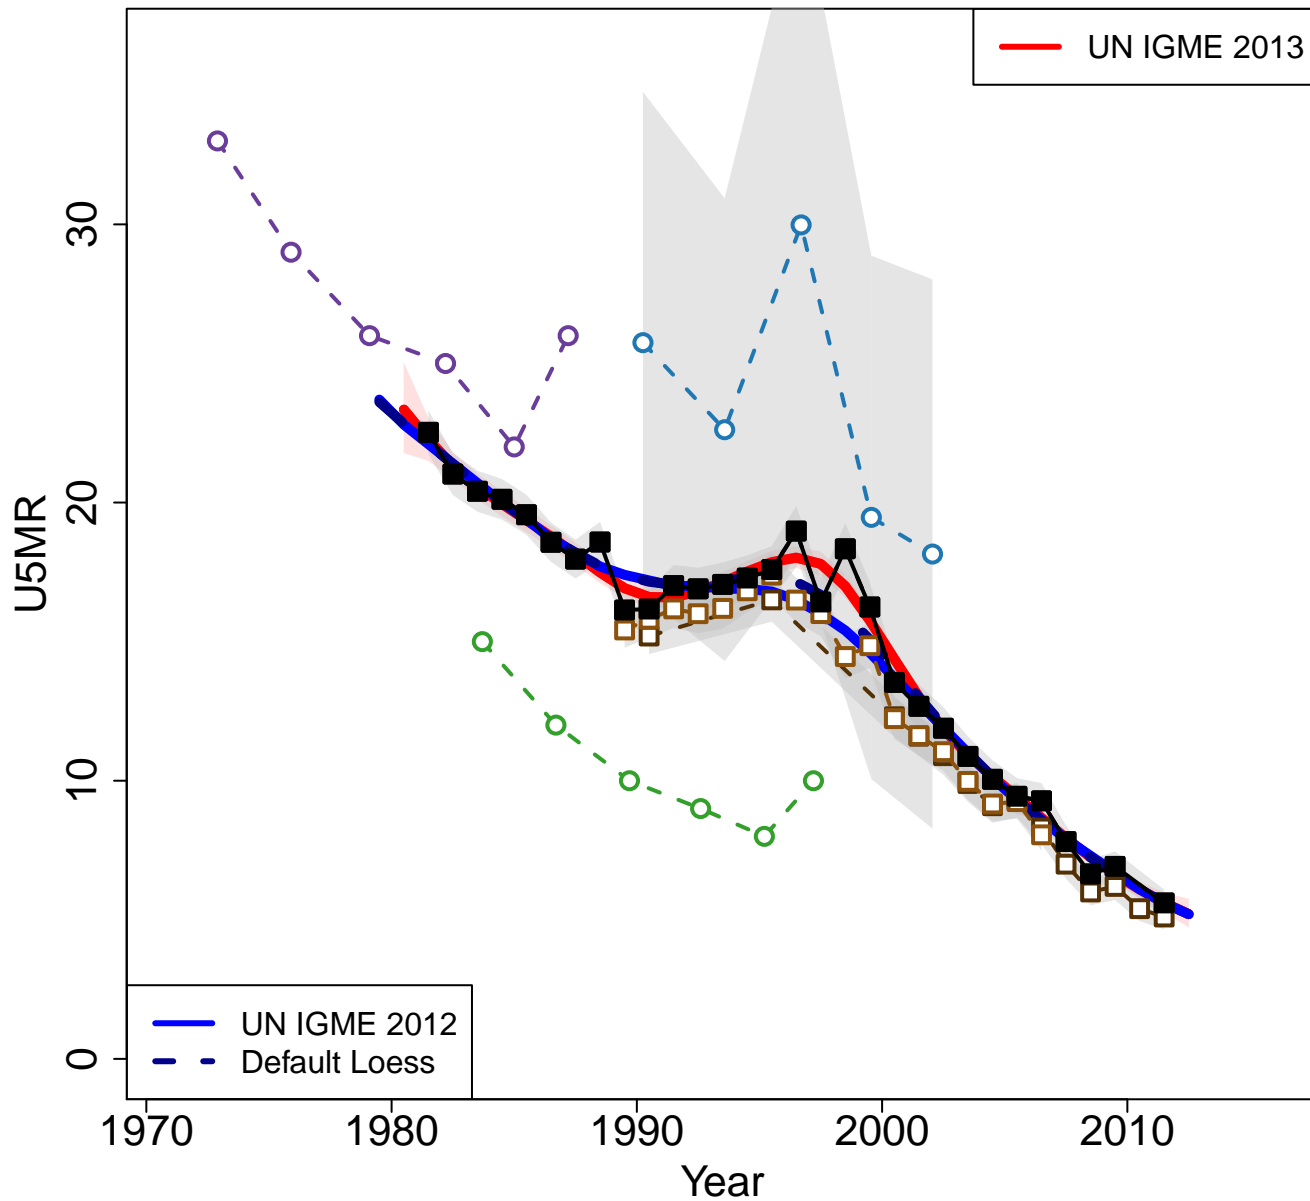

# Zoomed in

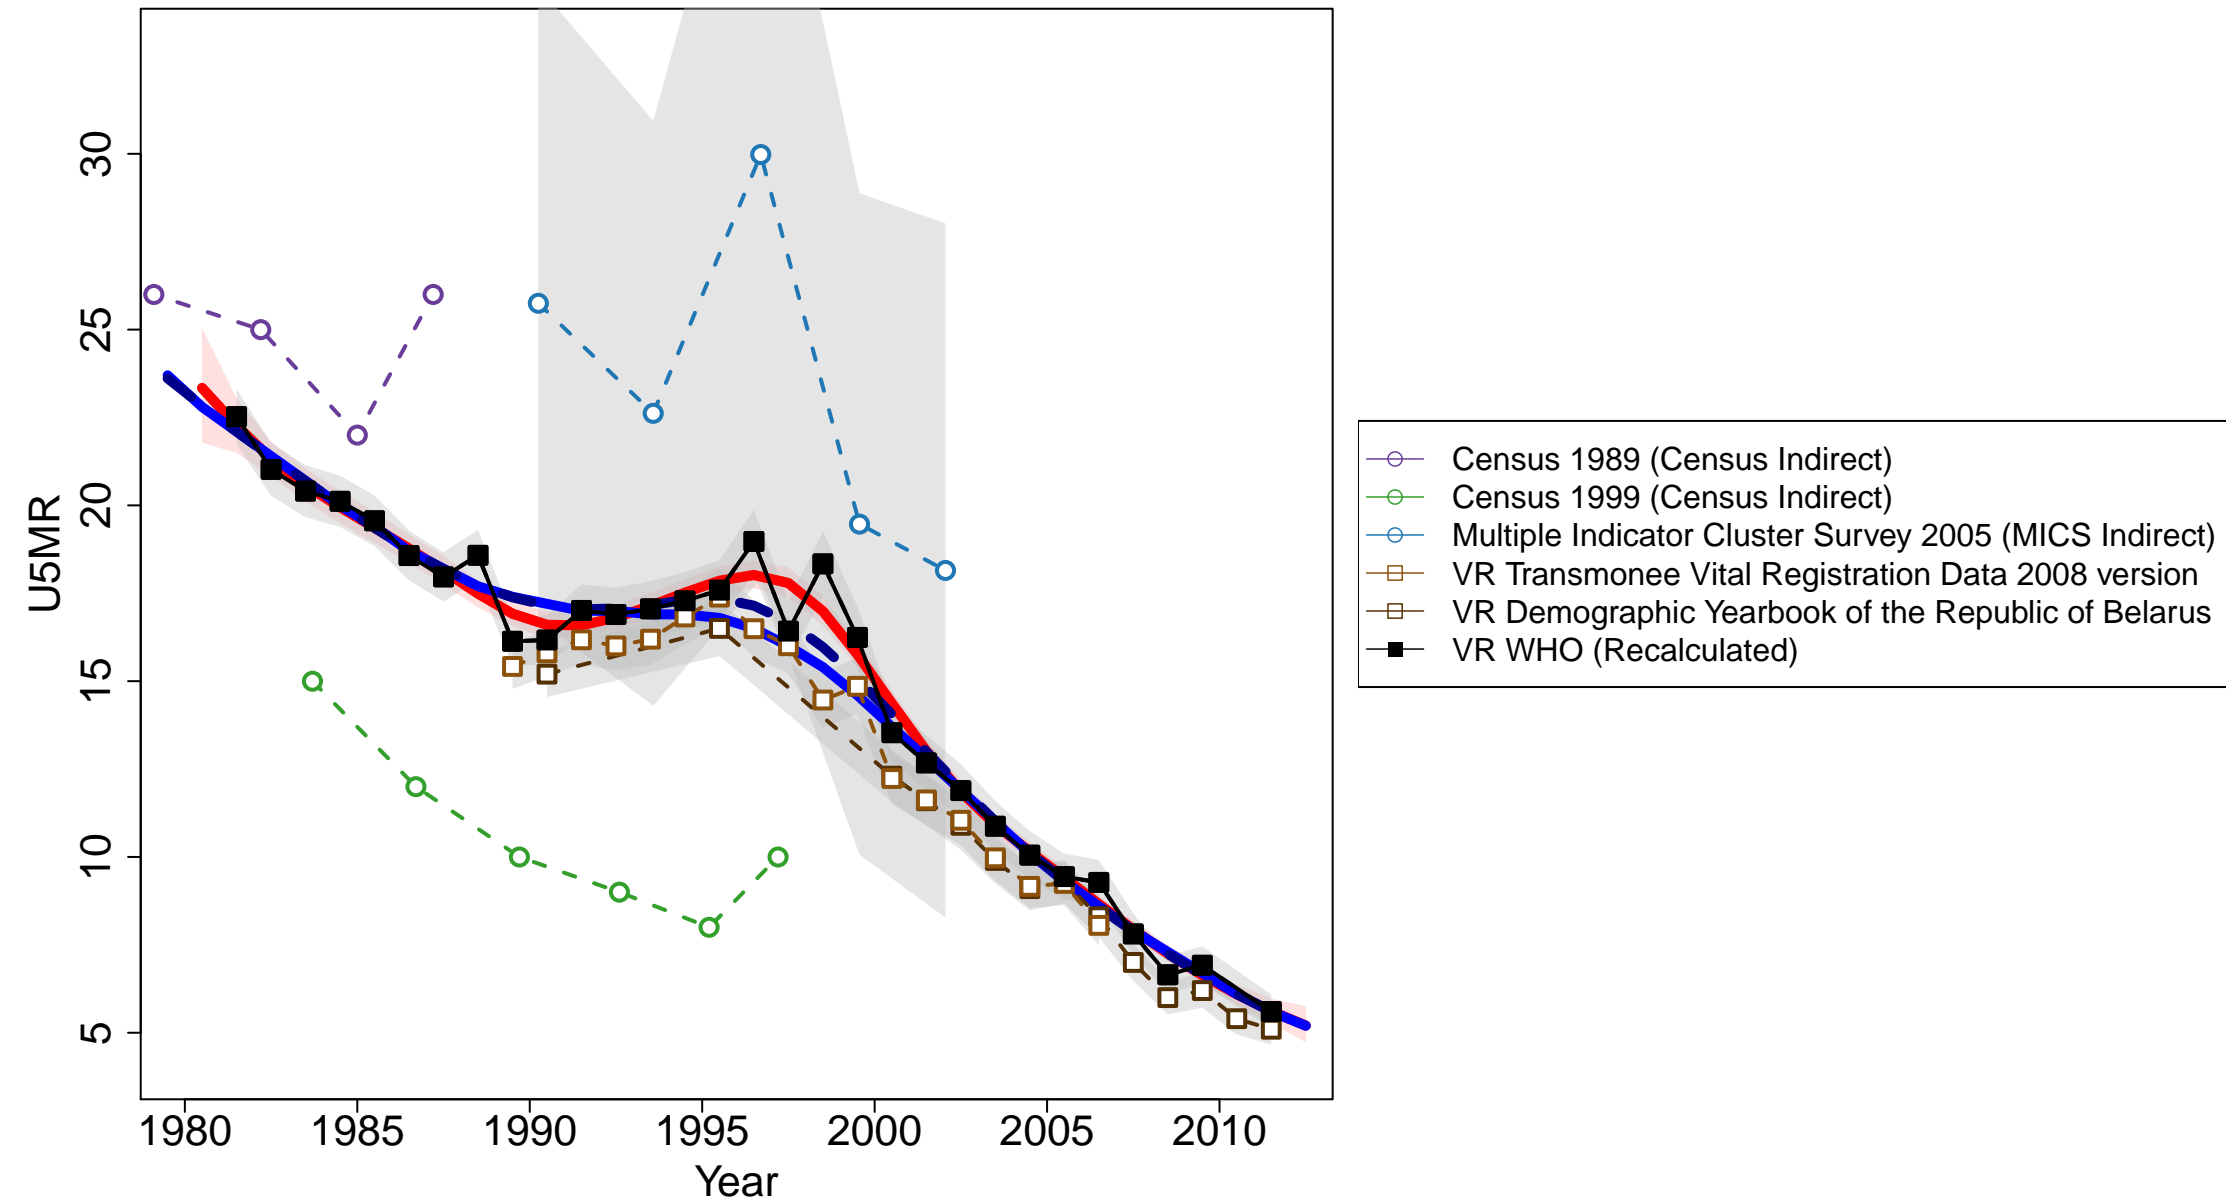

# Belize

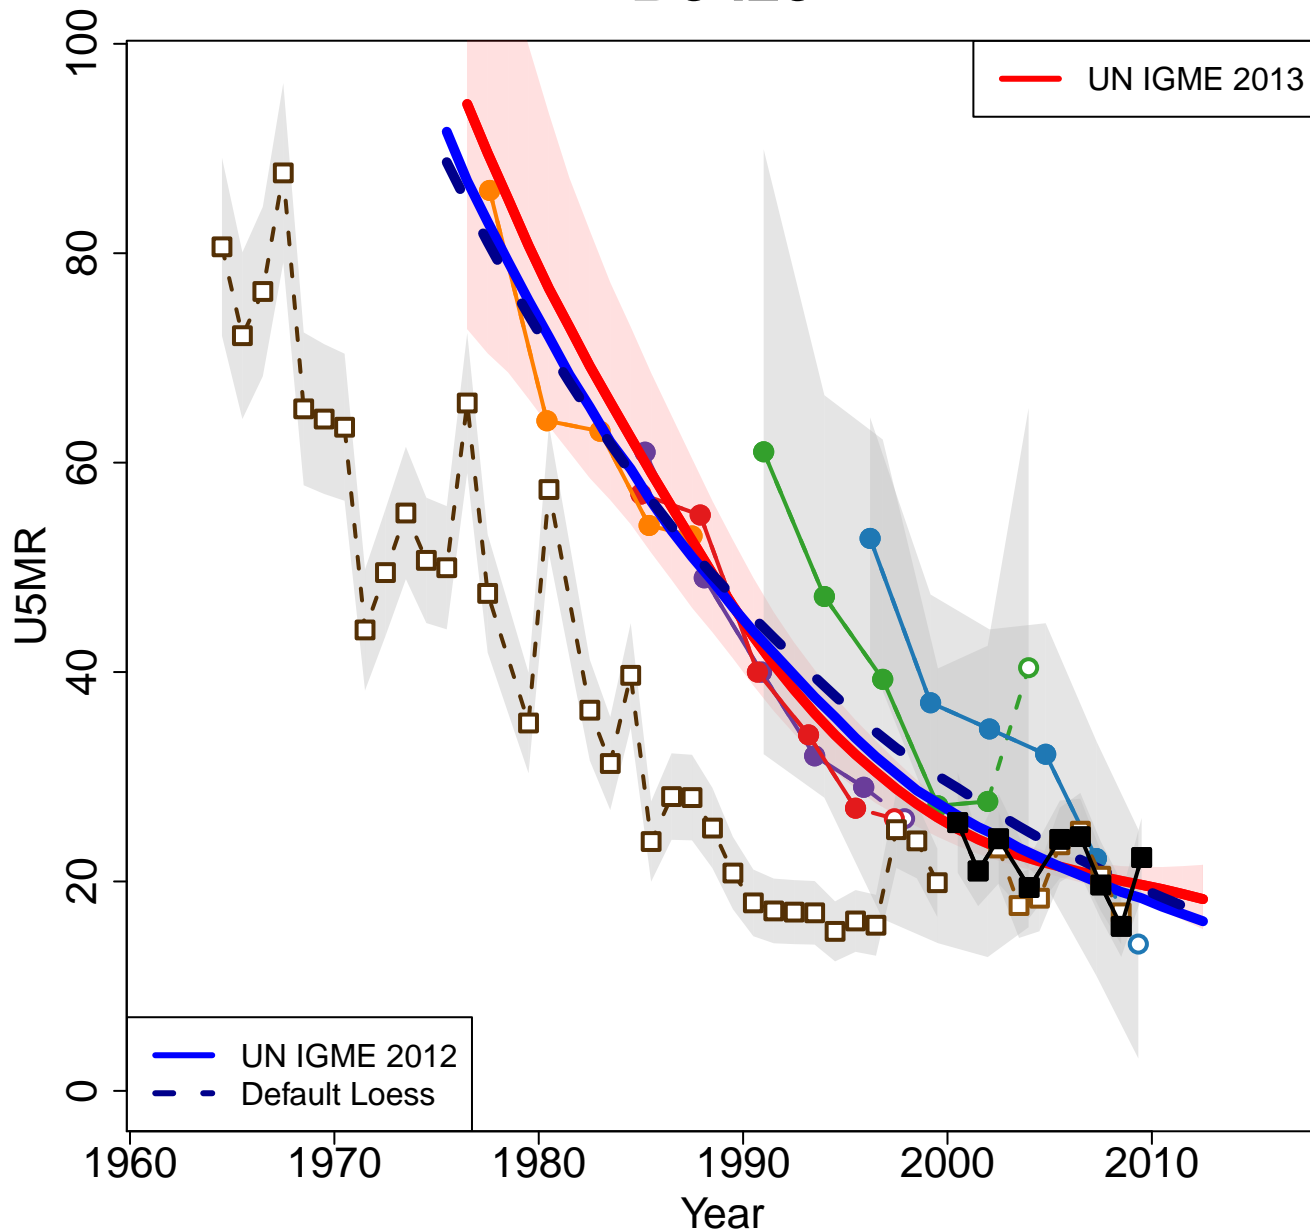

# Zoomed in

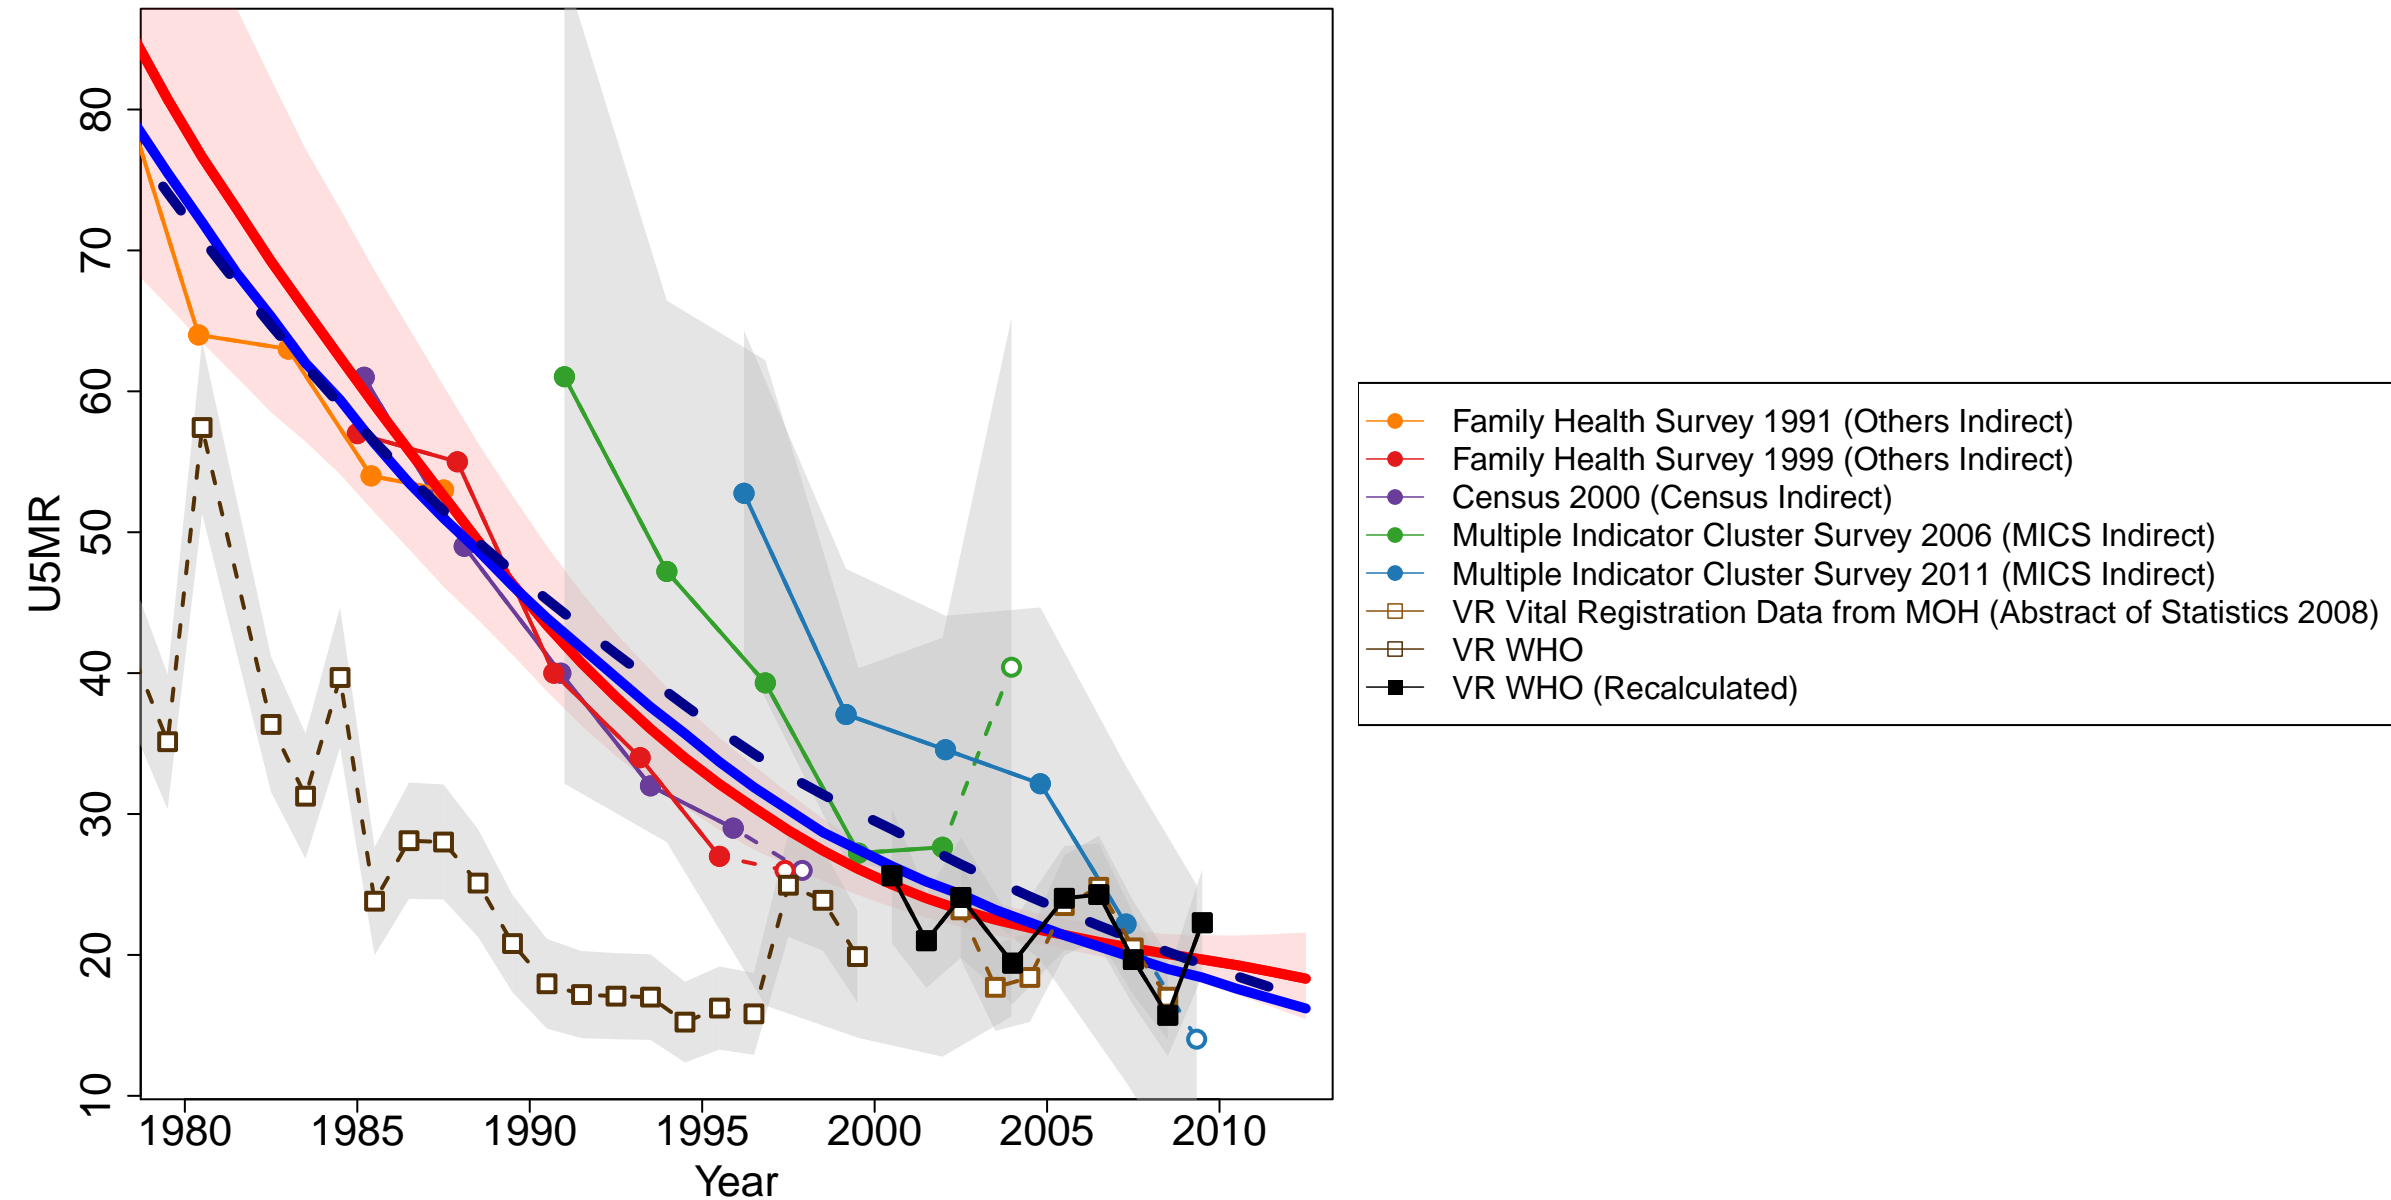

# Benin

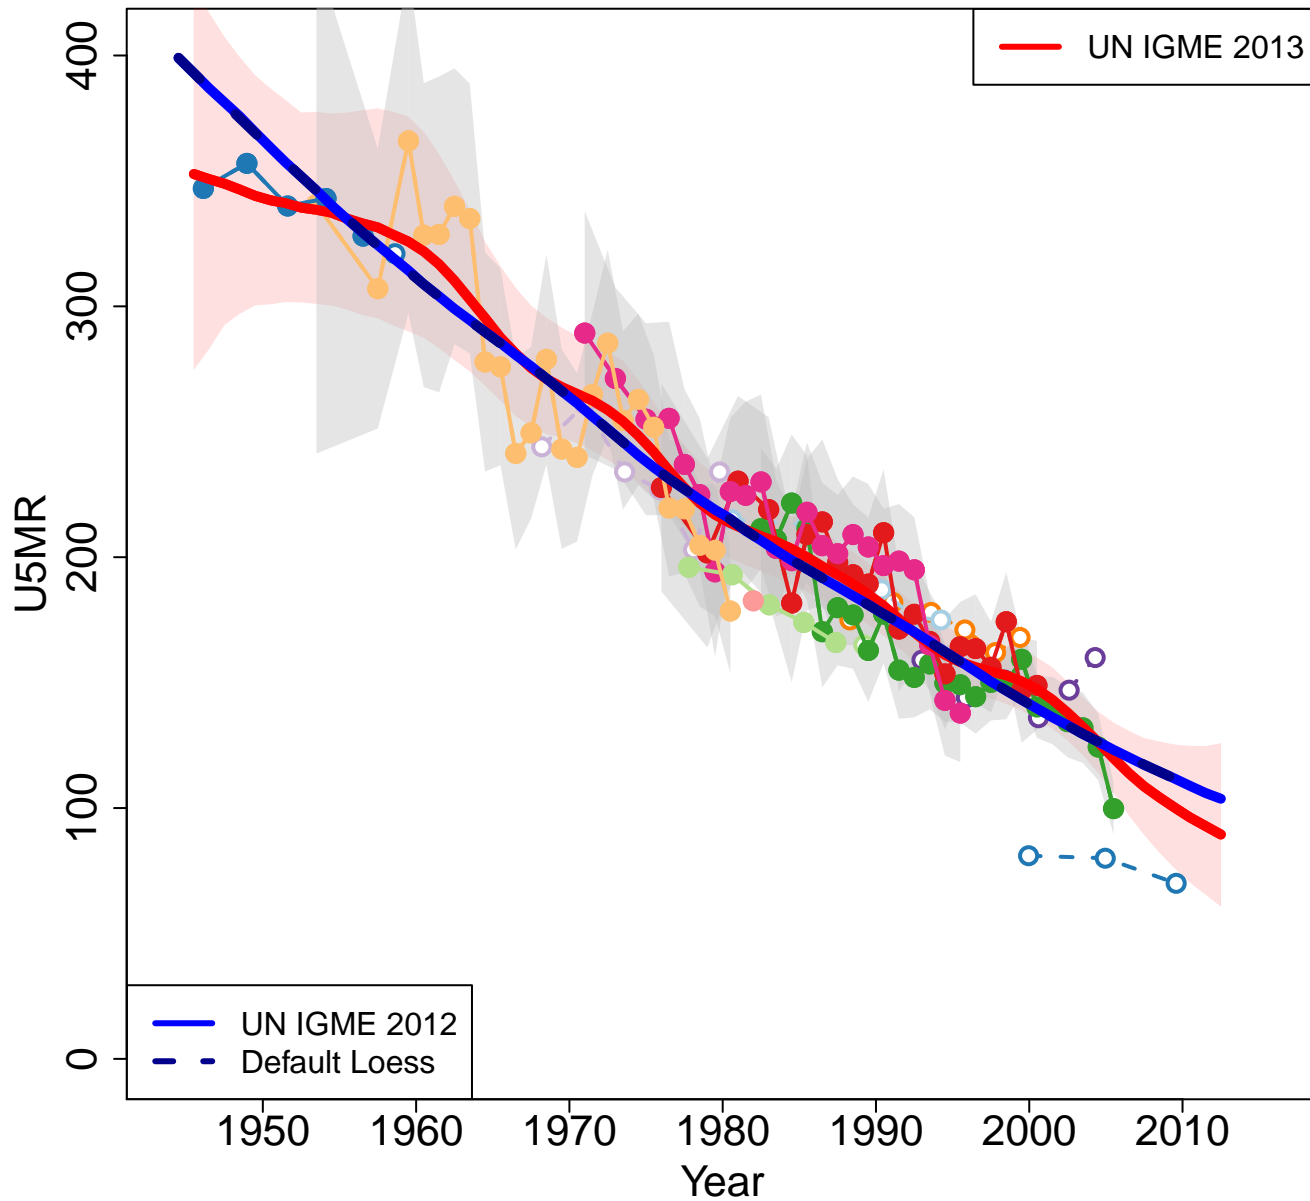

# Zoomed in

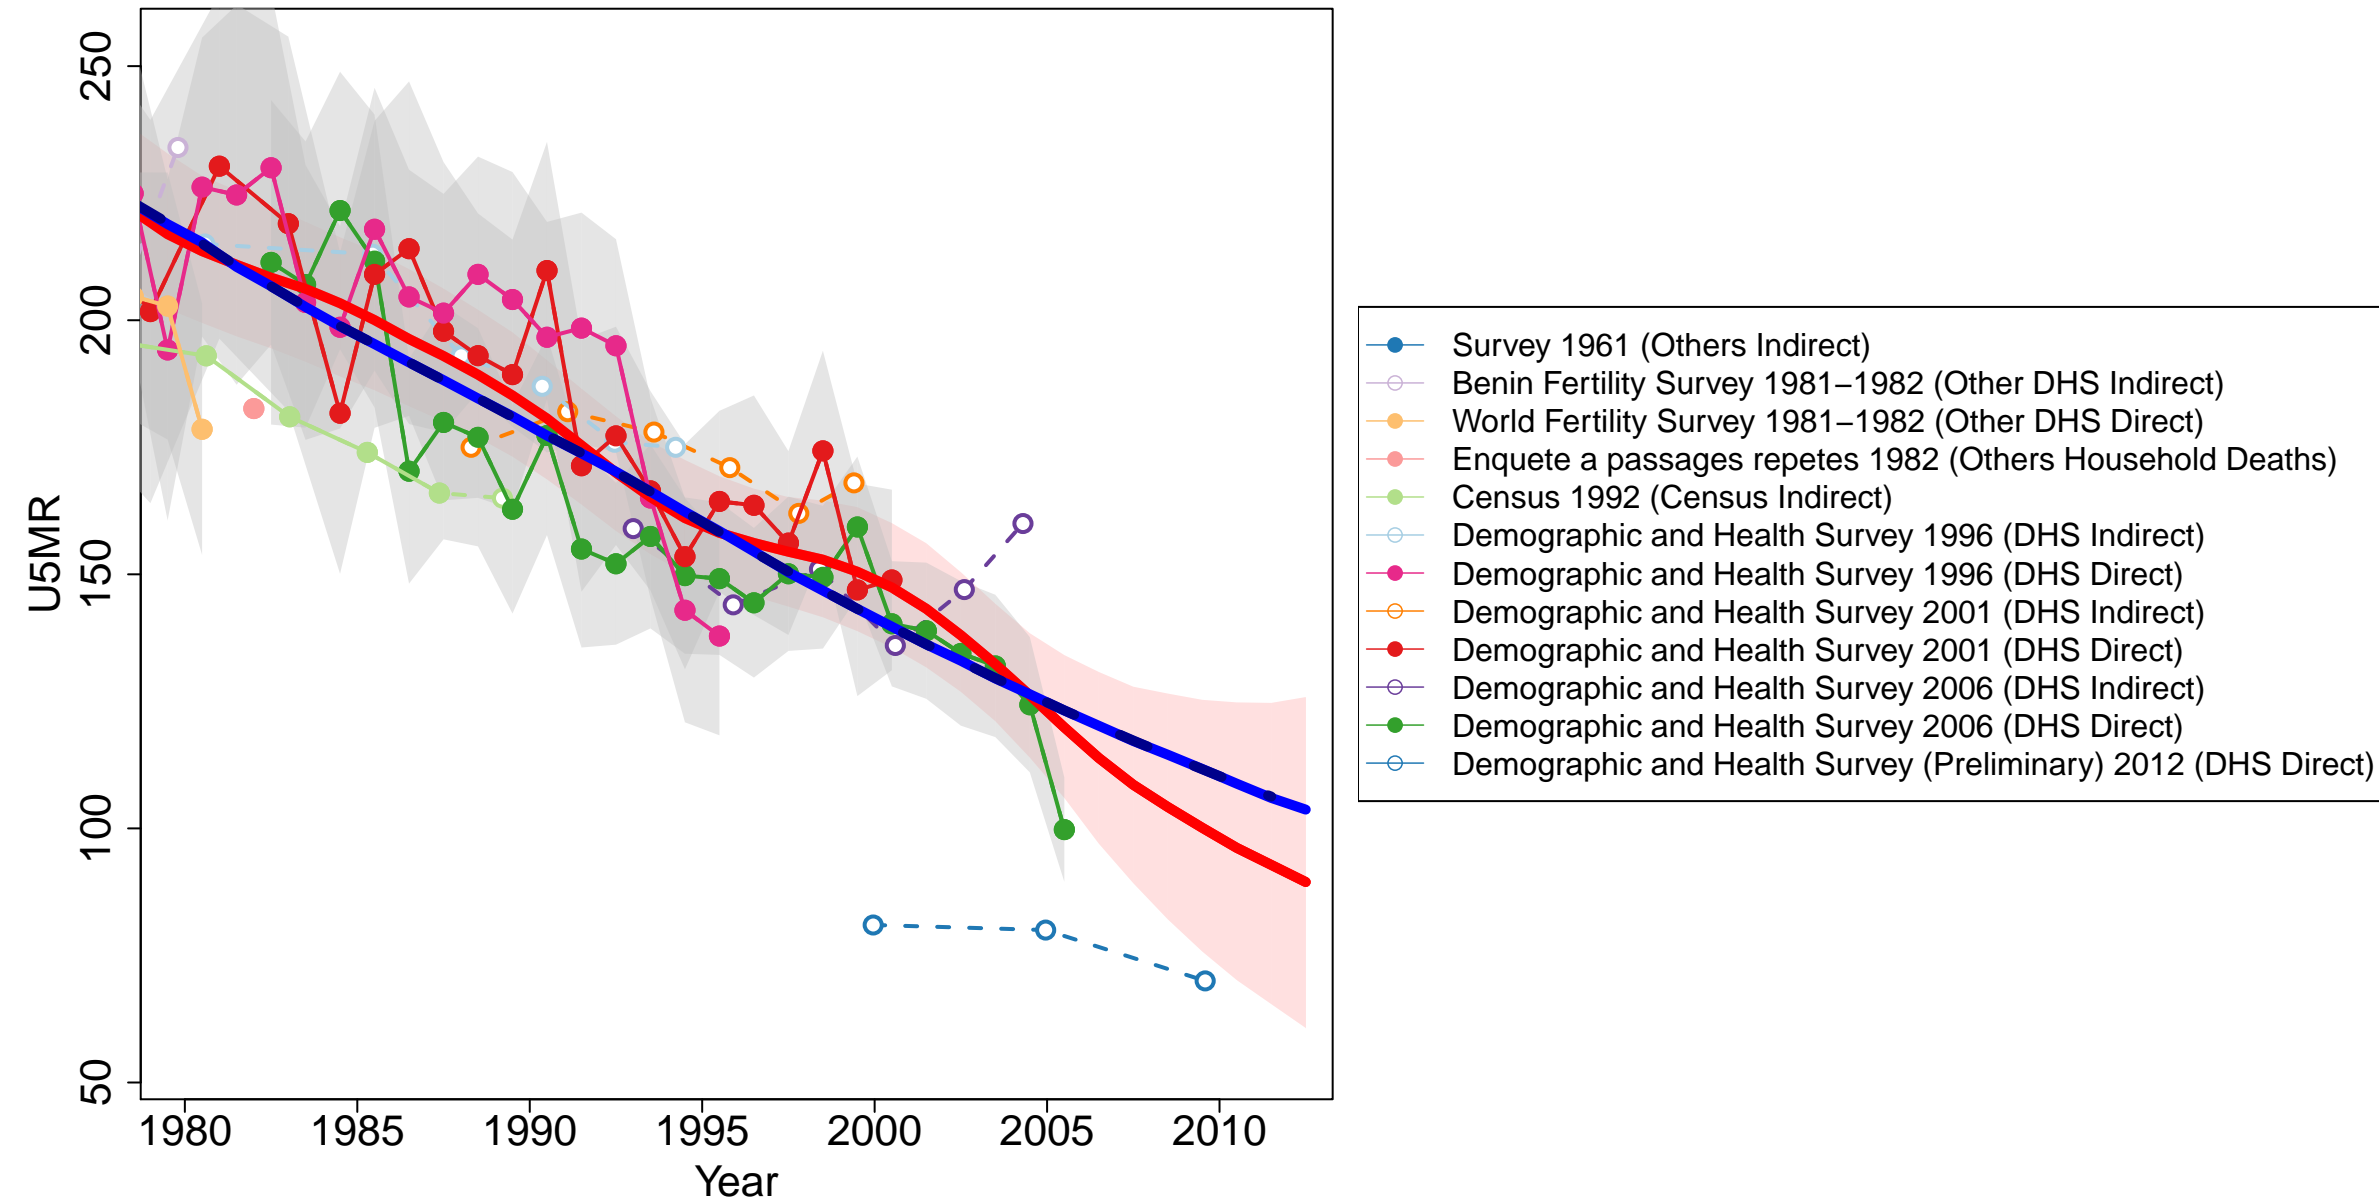

# Bhutan

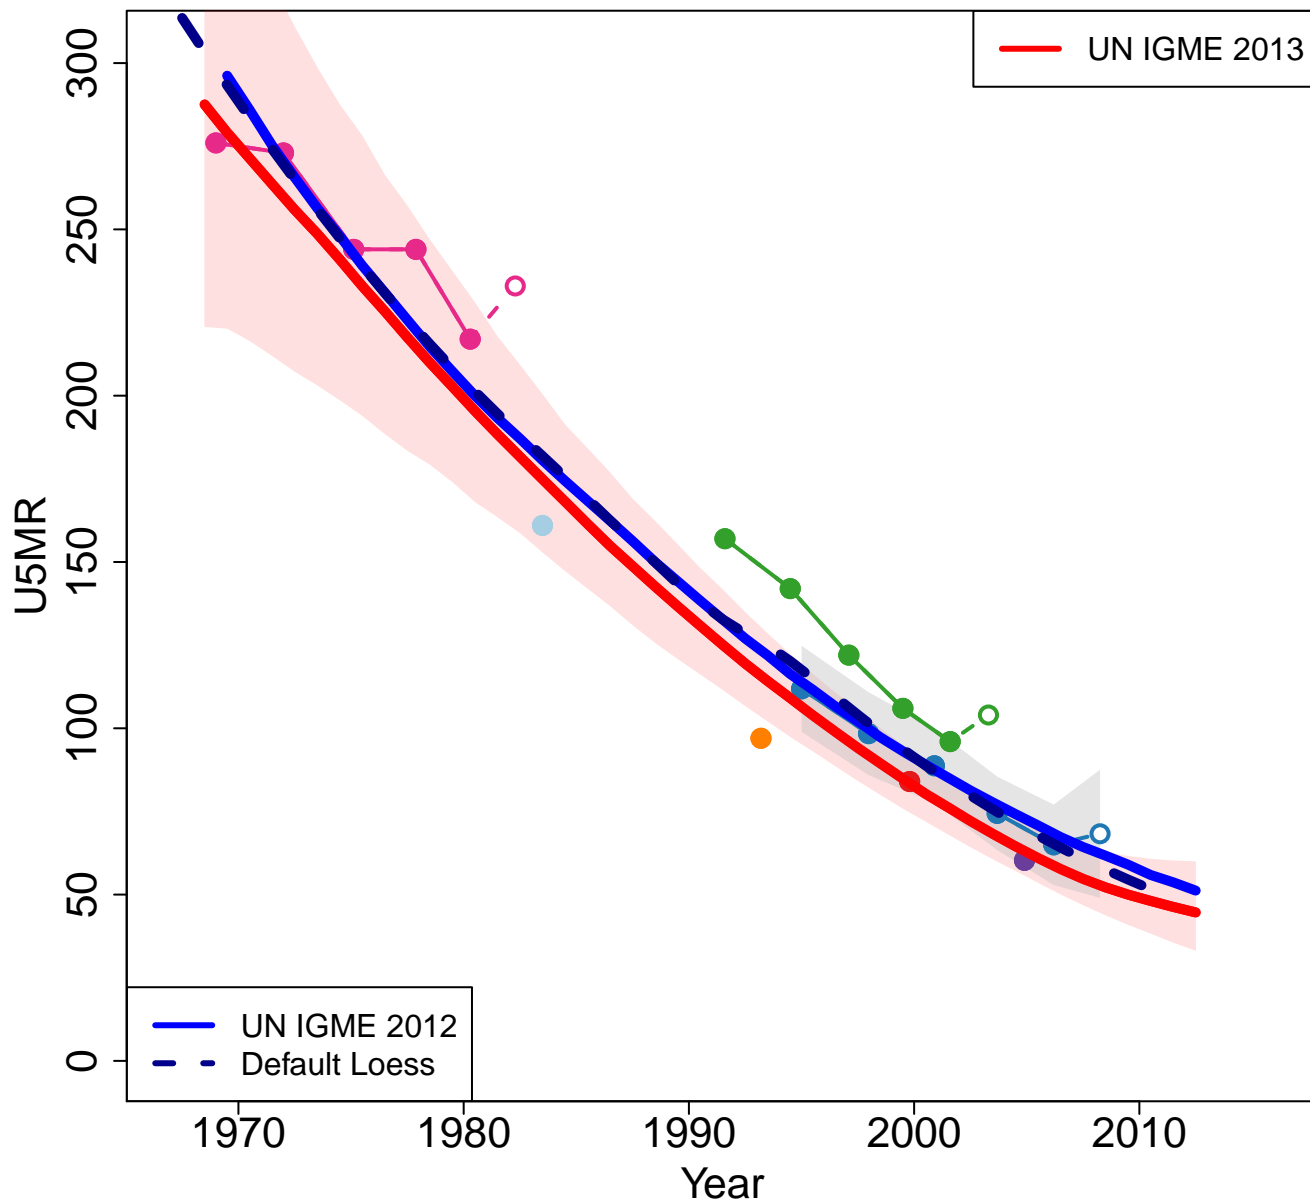

# Zoomed in

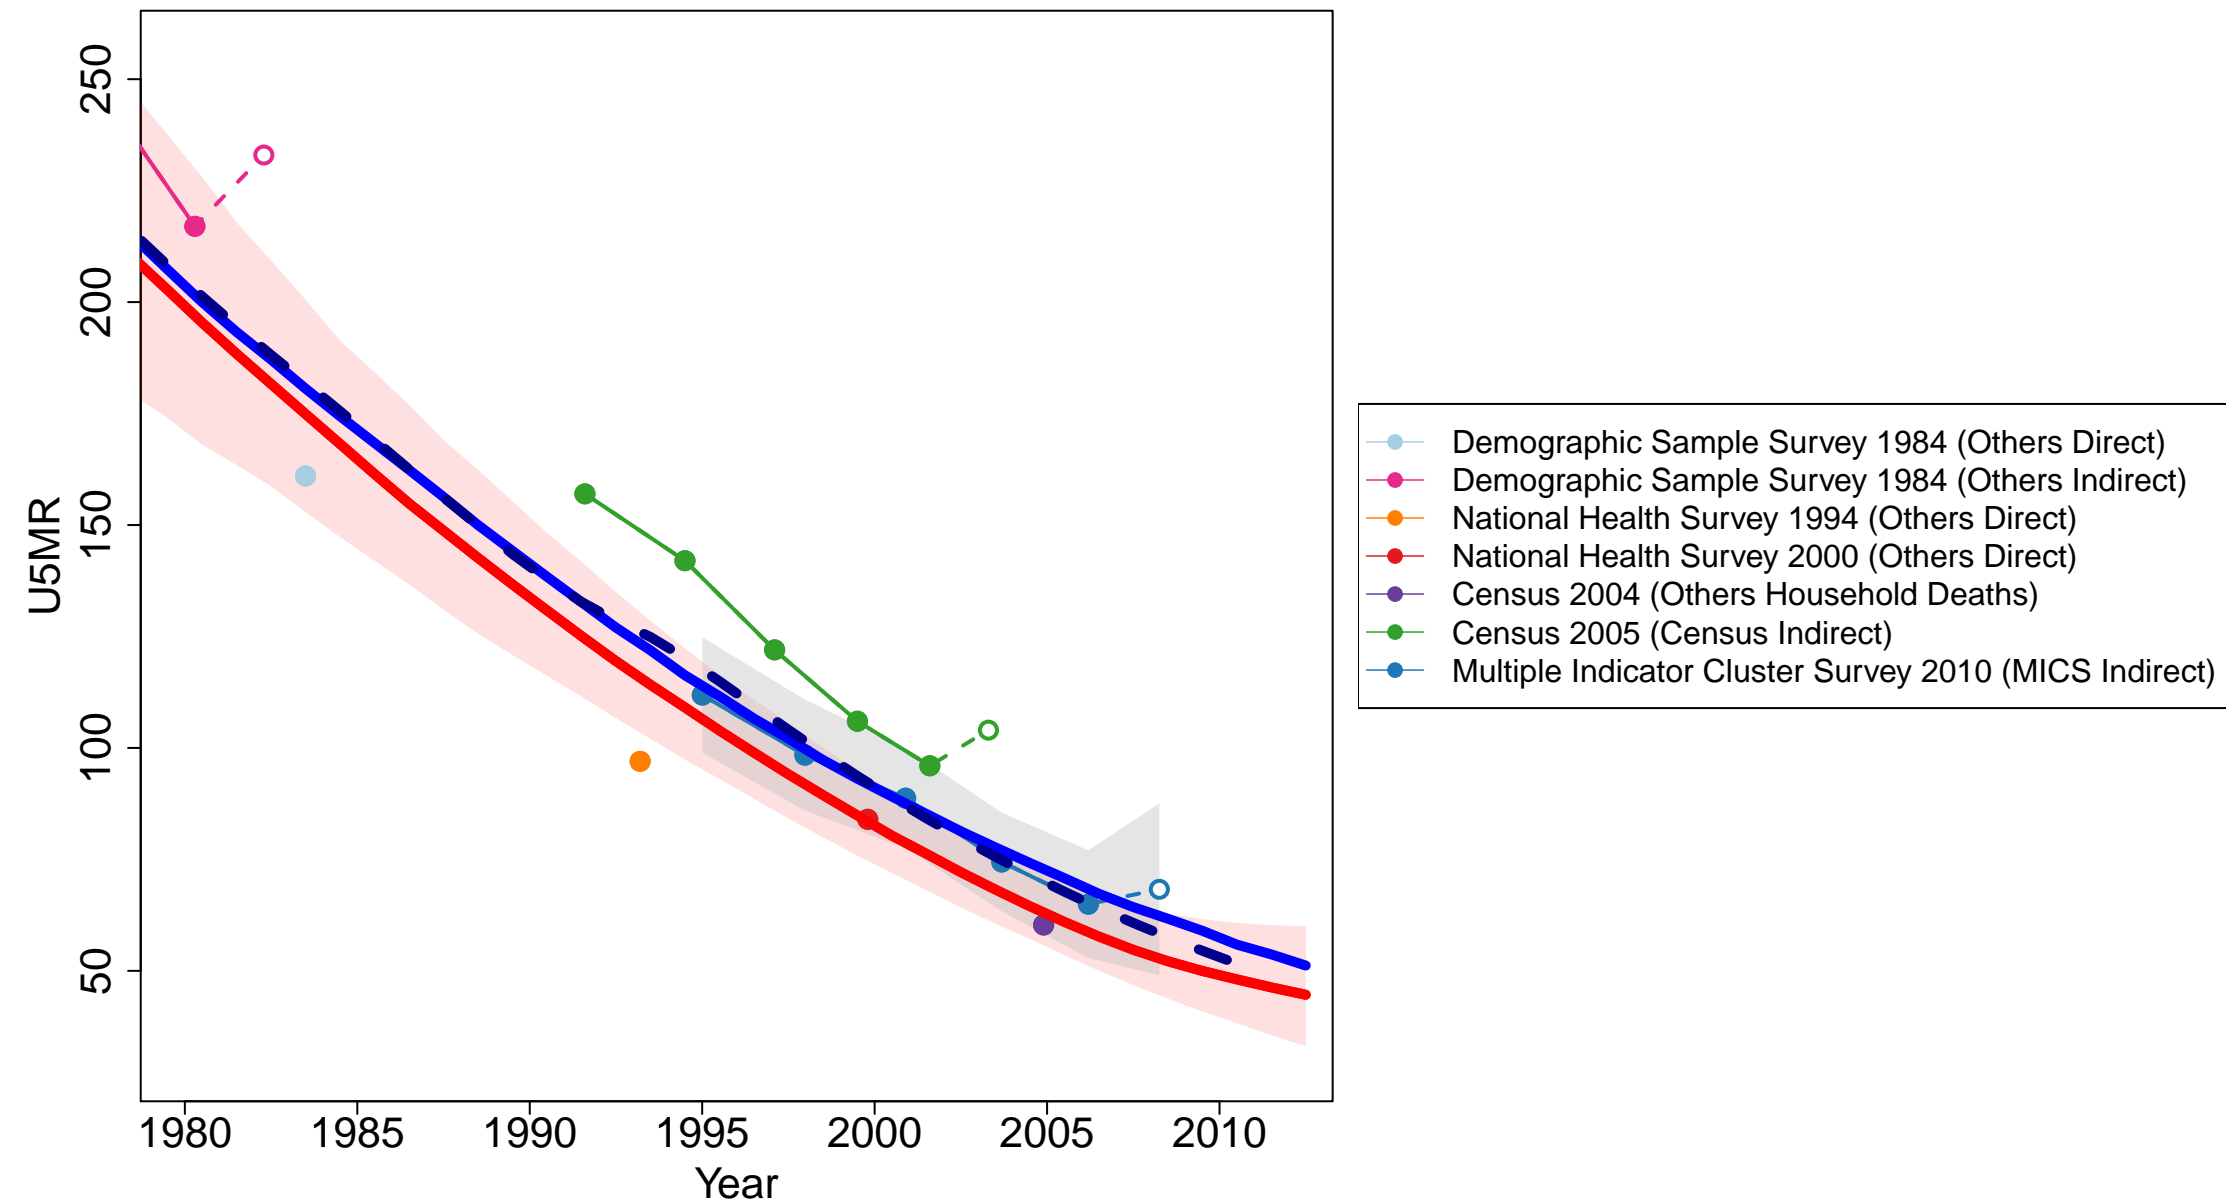



# Bolivia

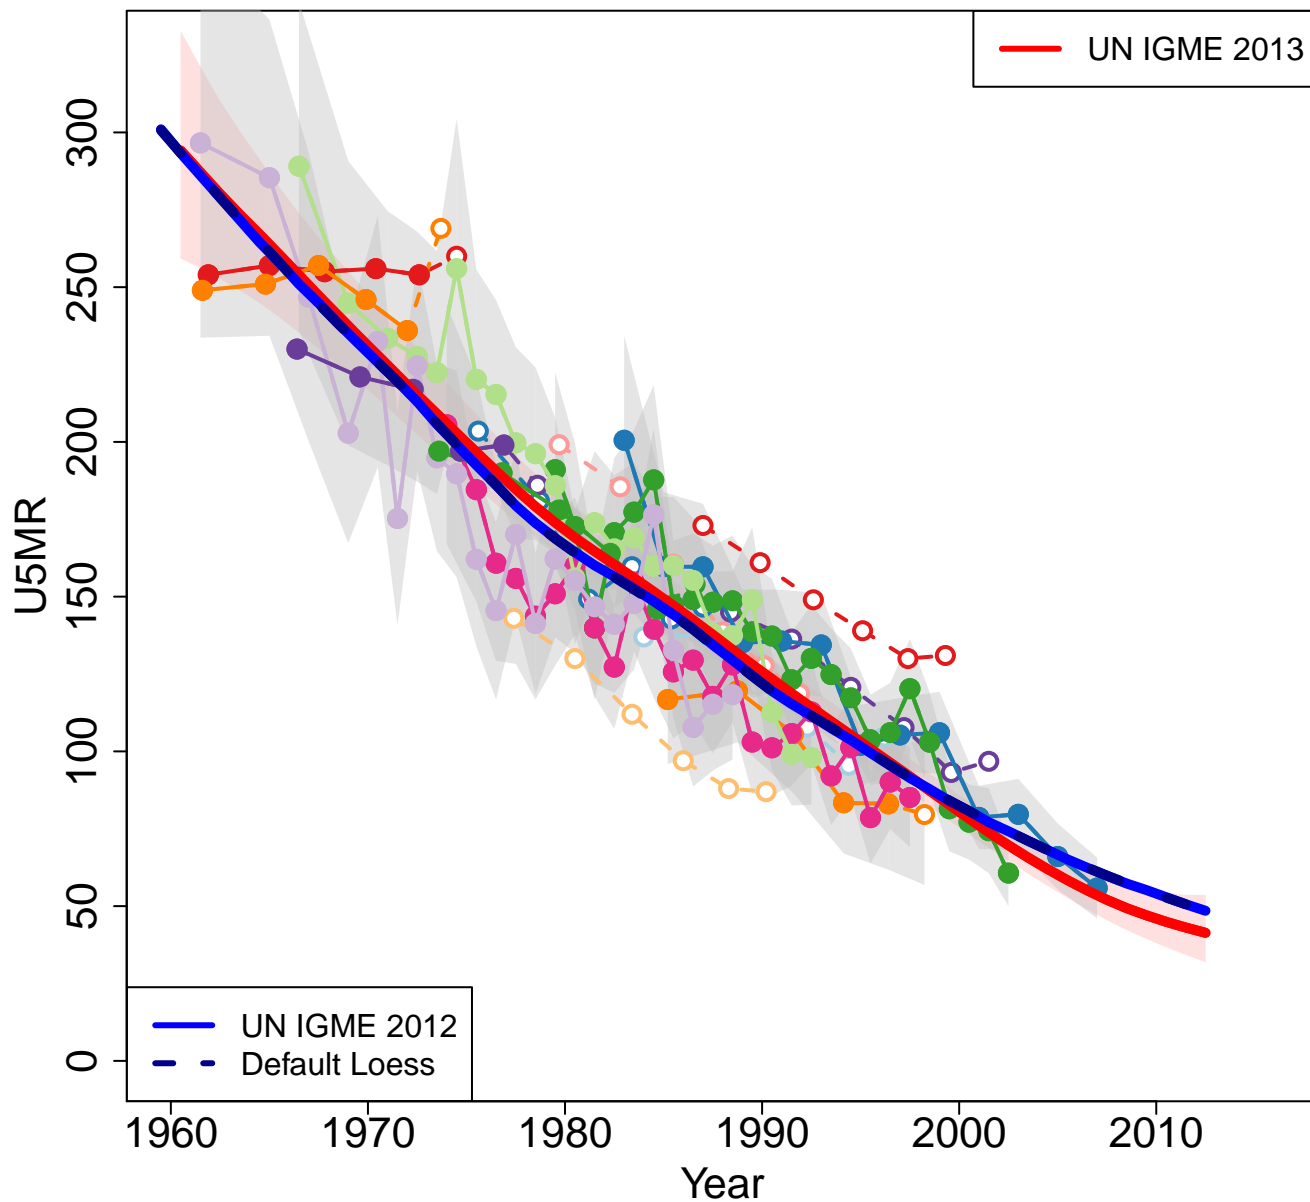

# Zoomed in

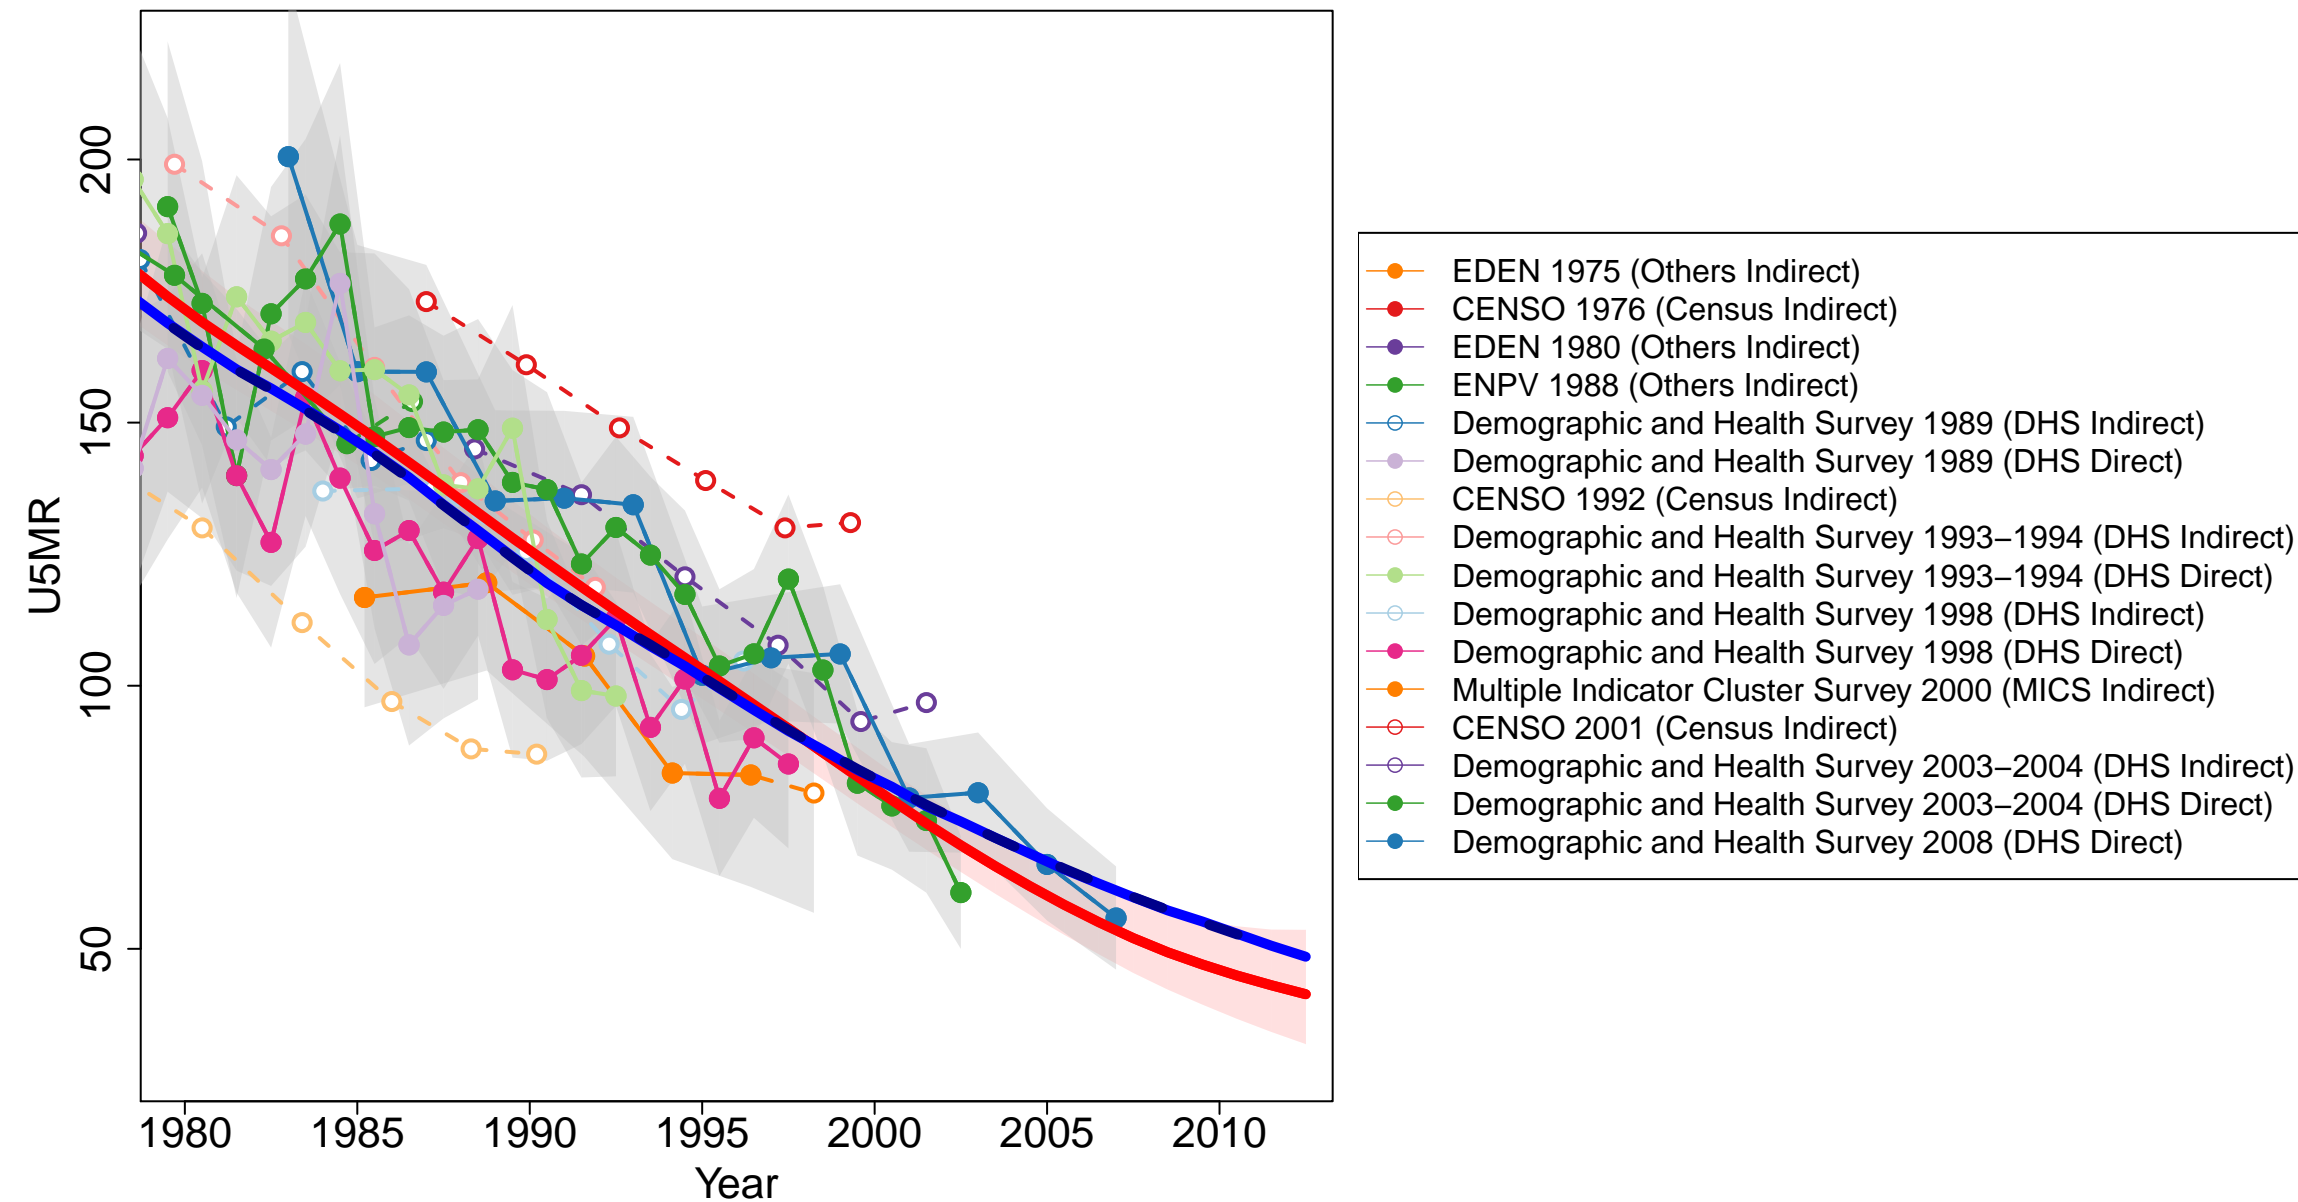

# Bosnia & Herzegovina

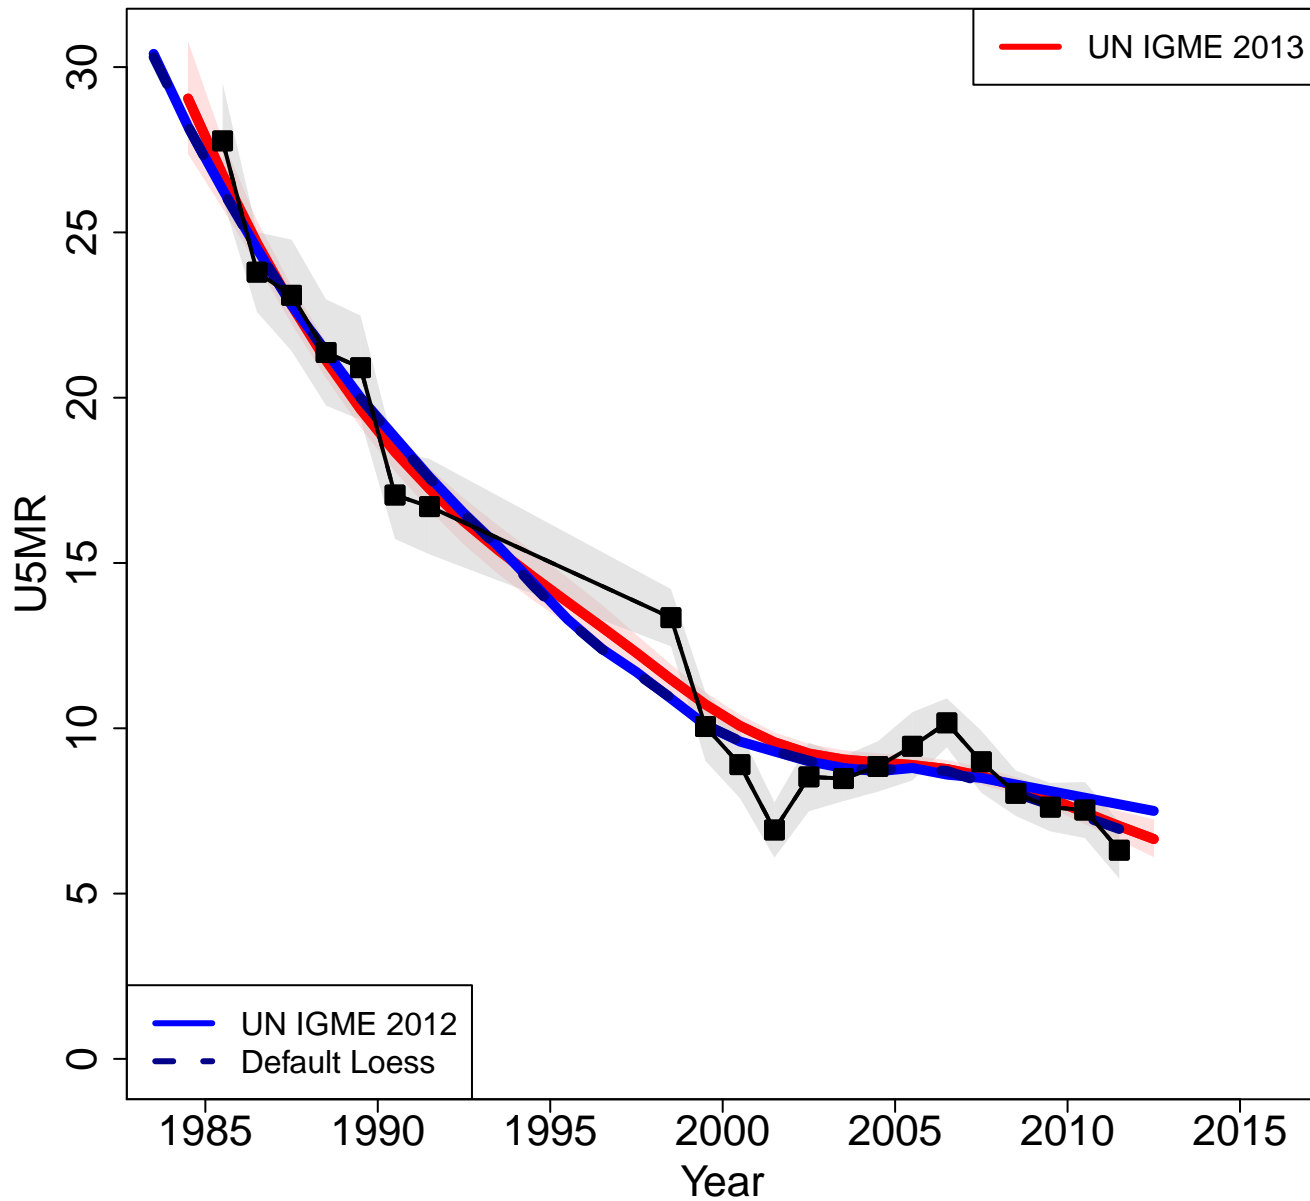

# Zoomed in

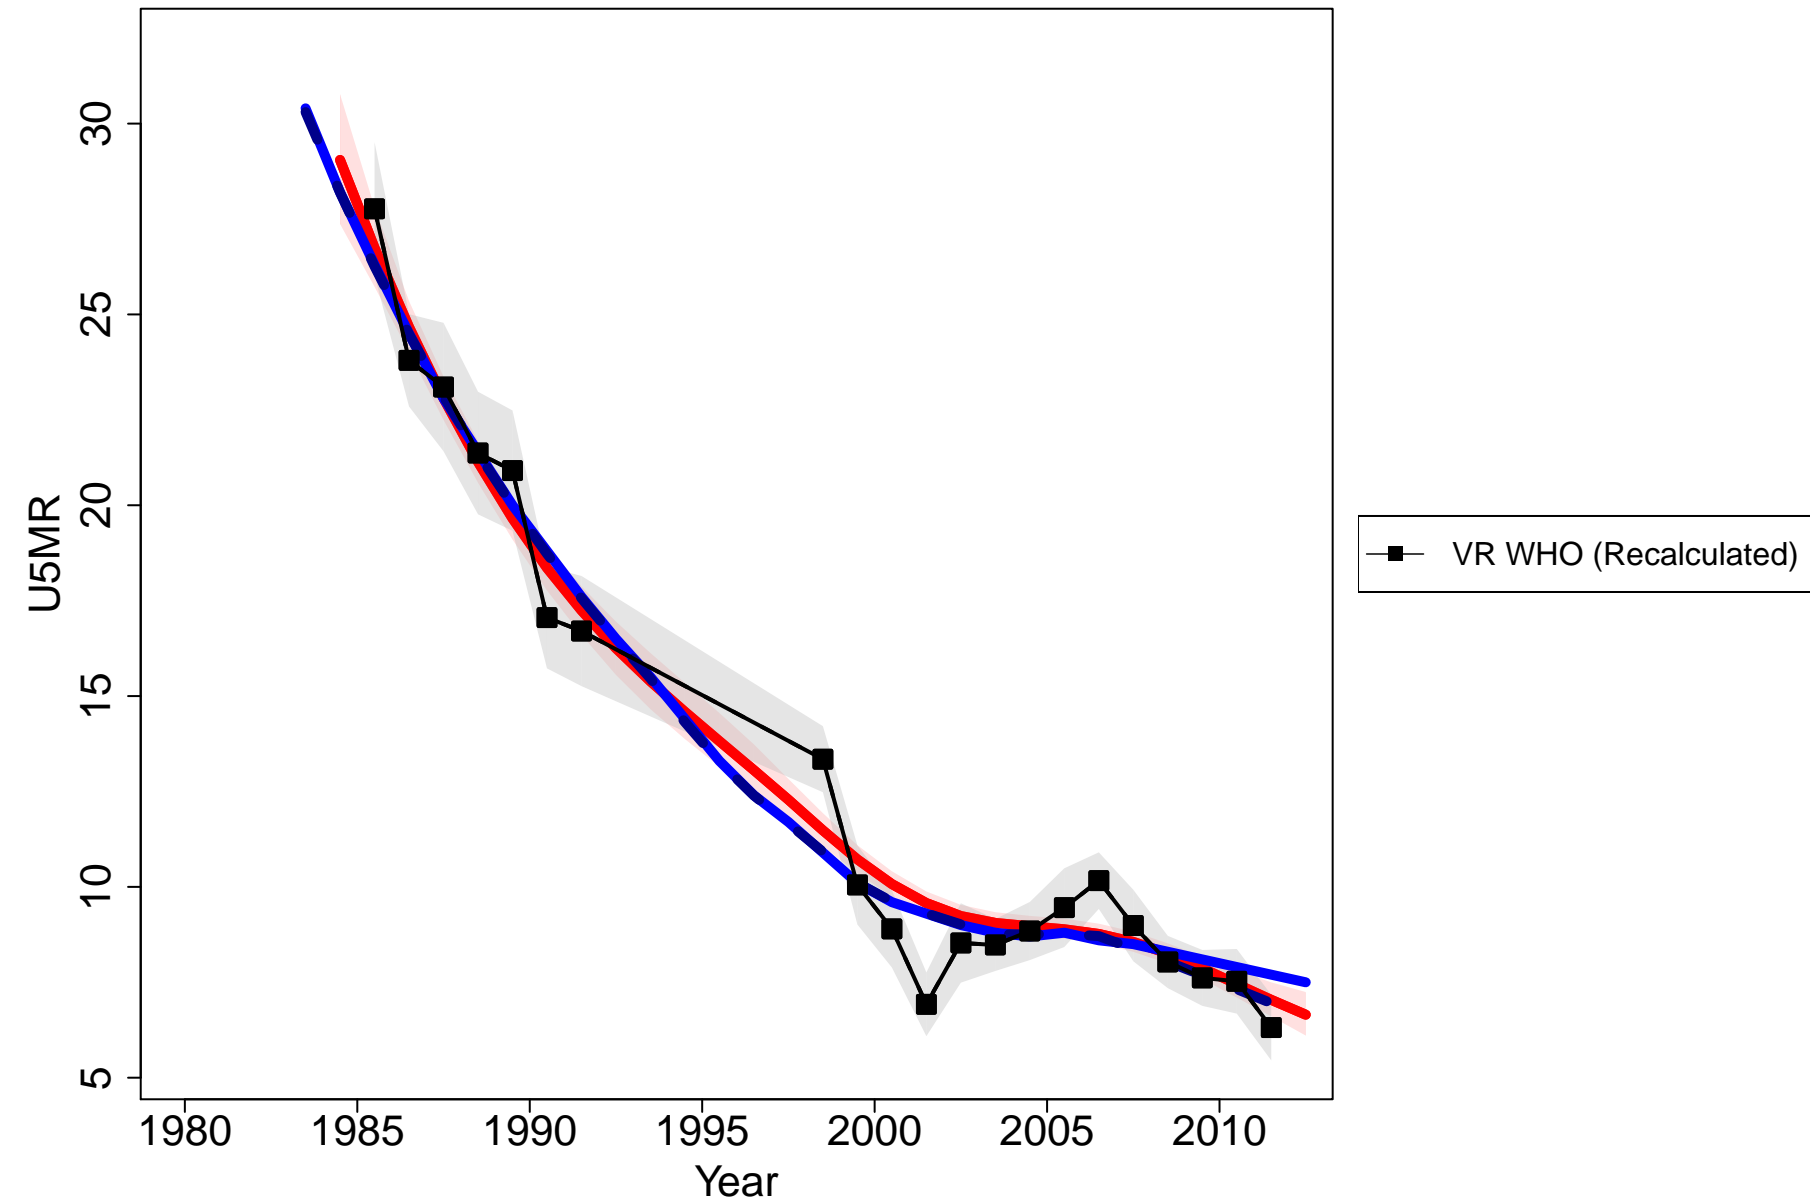

# Brazil

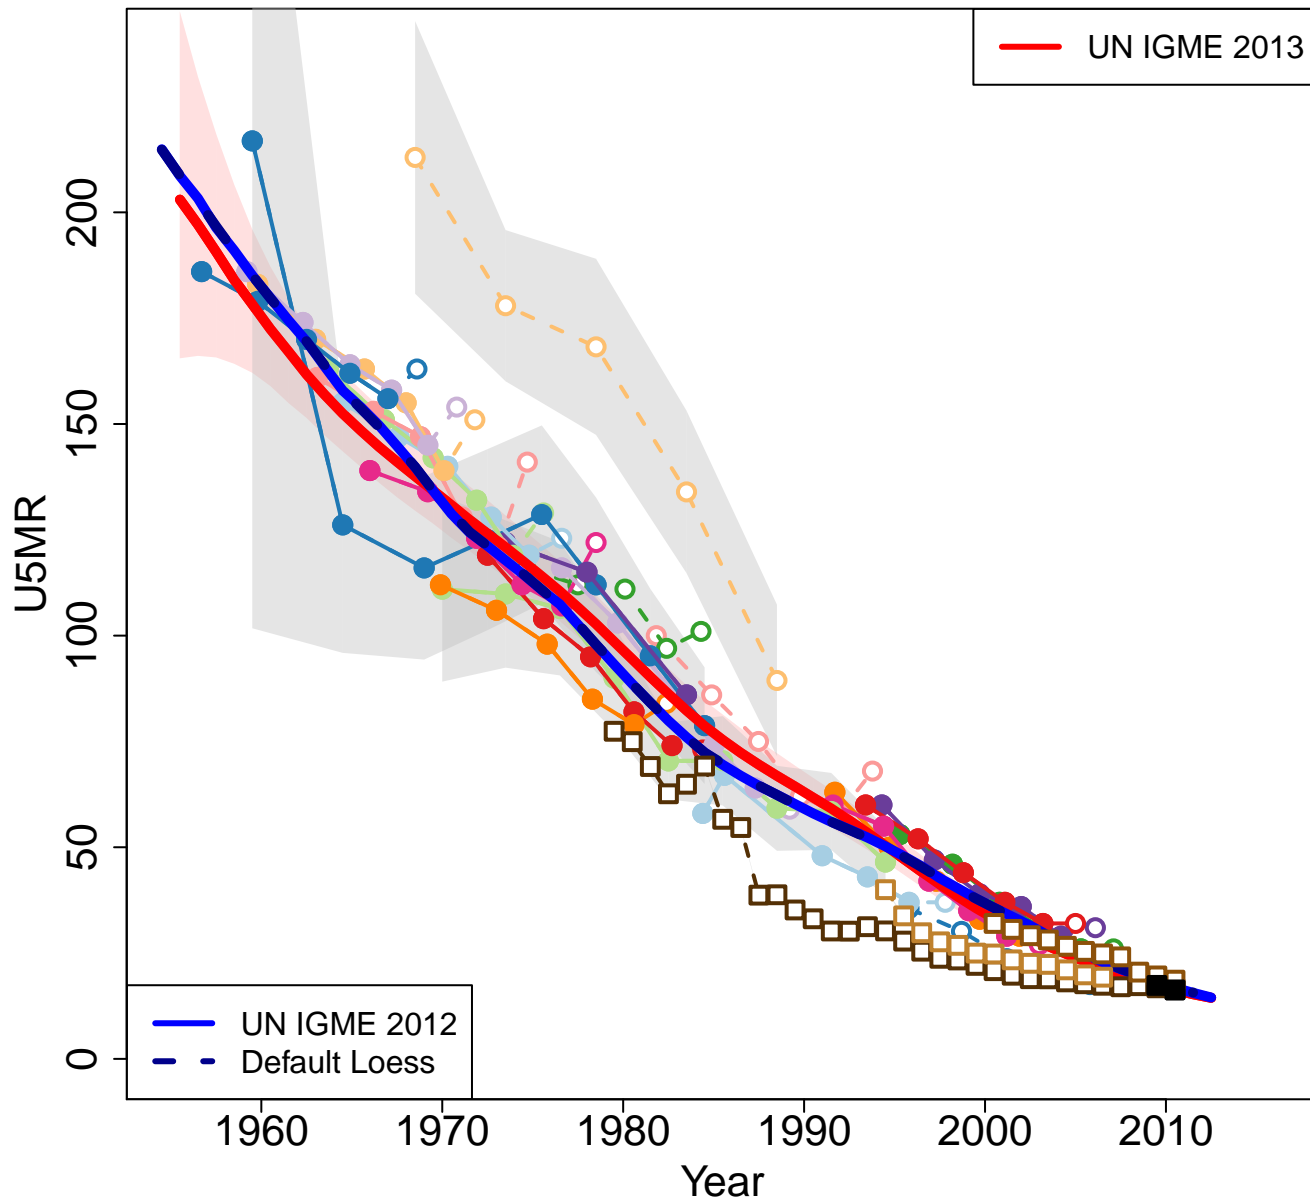

# Zoomed in

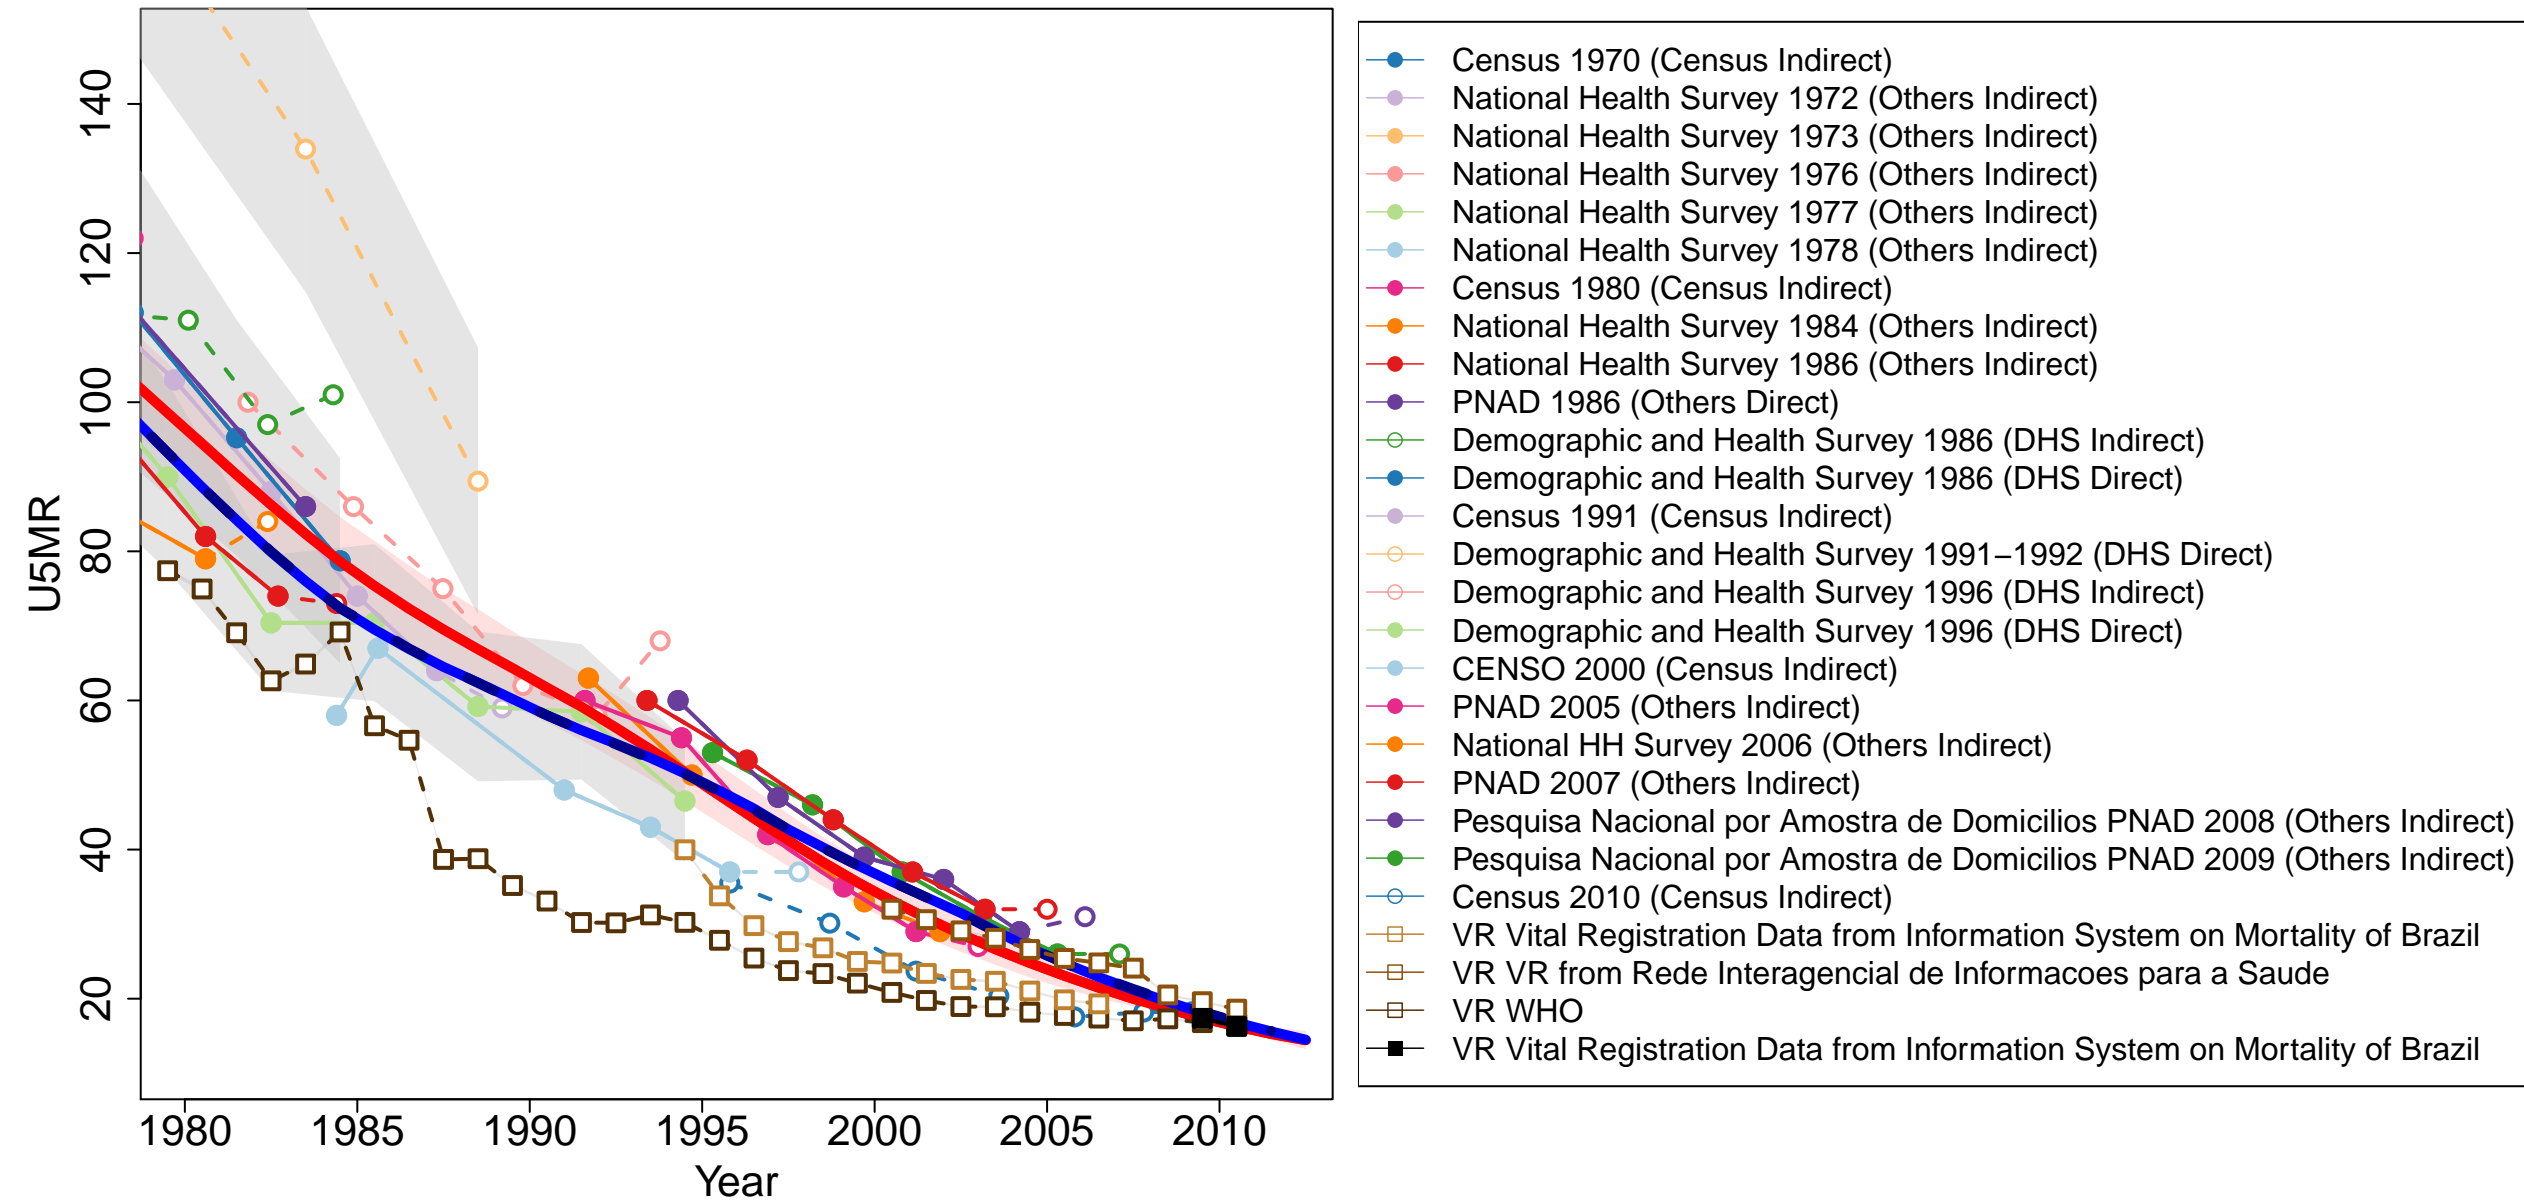

# Brunei

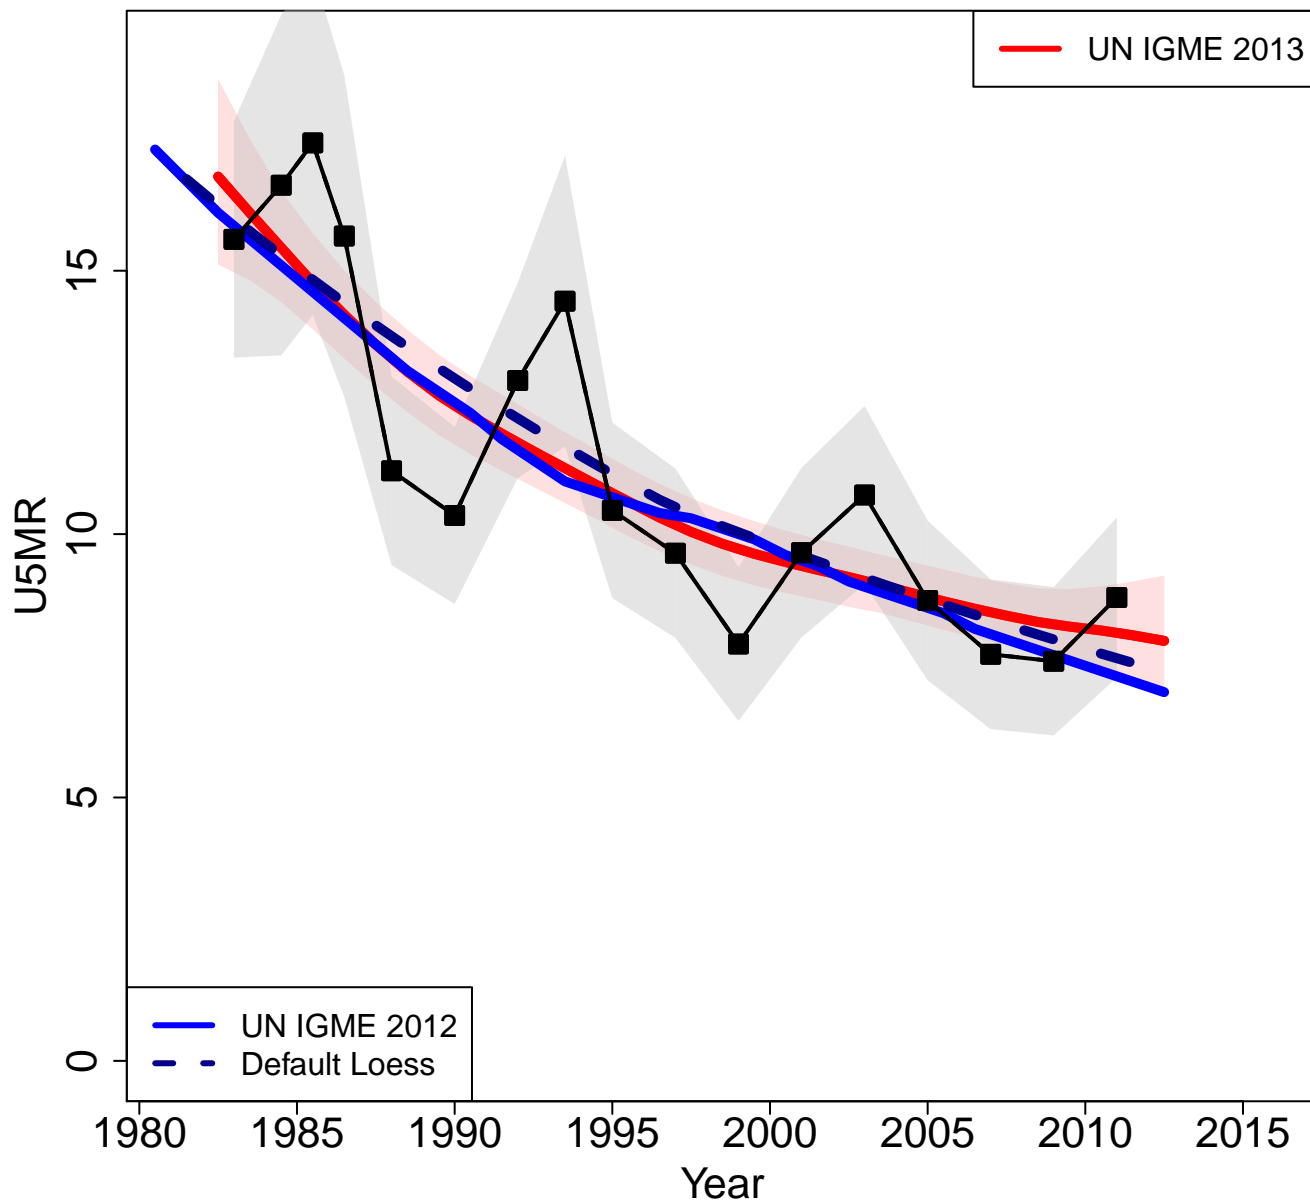

# Zoomed in

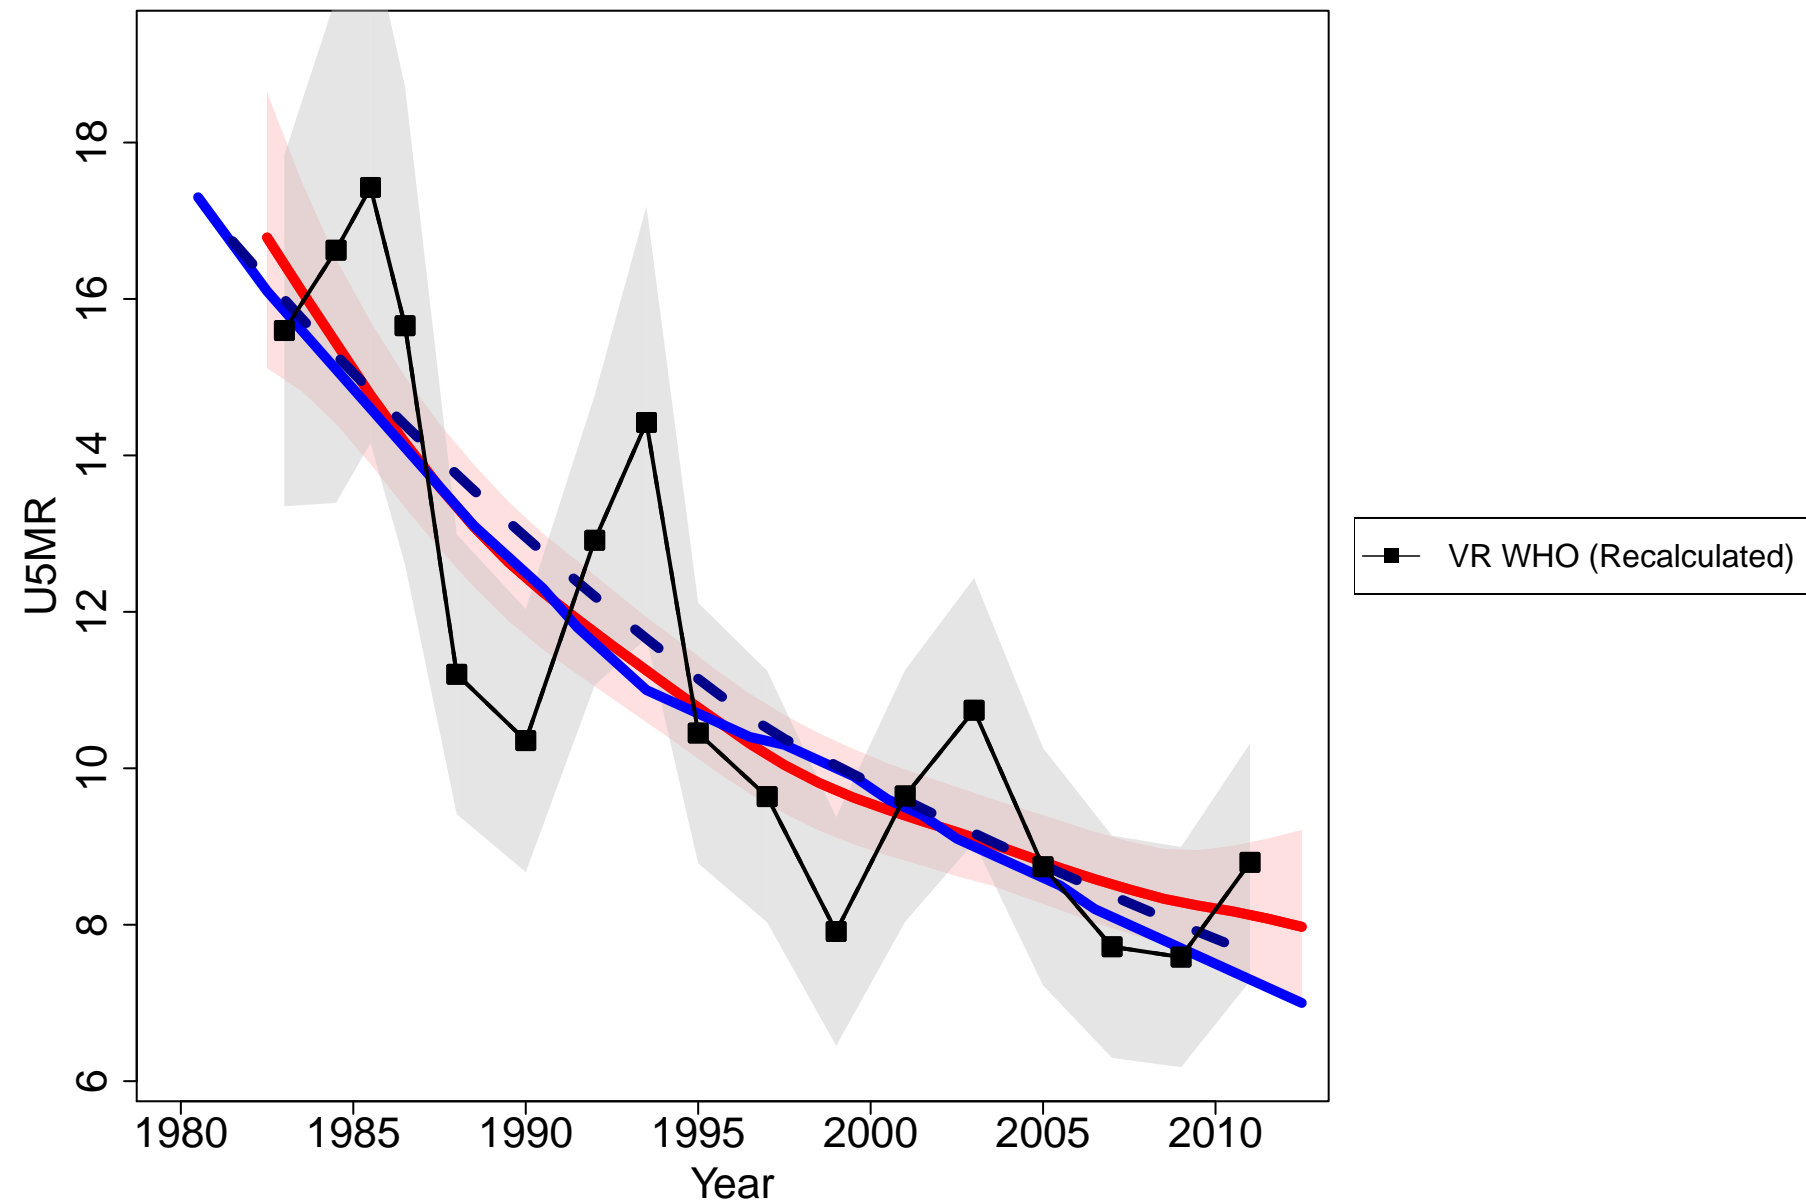

# Burkina Faso

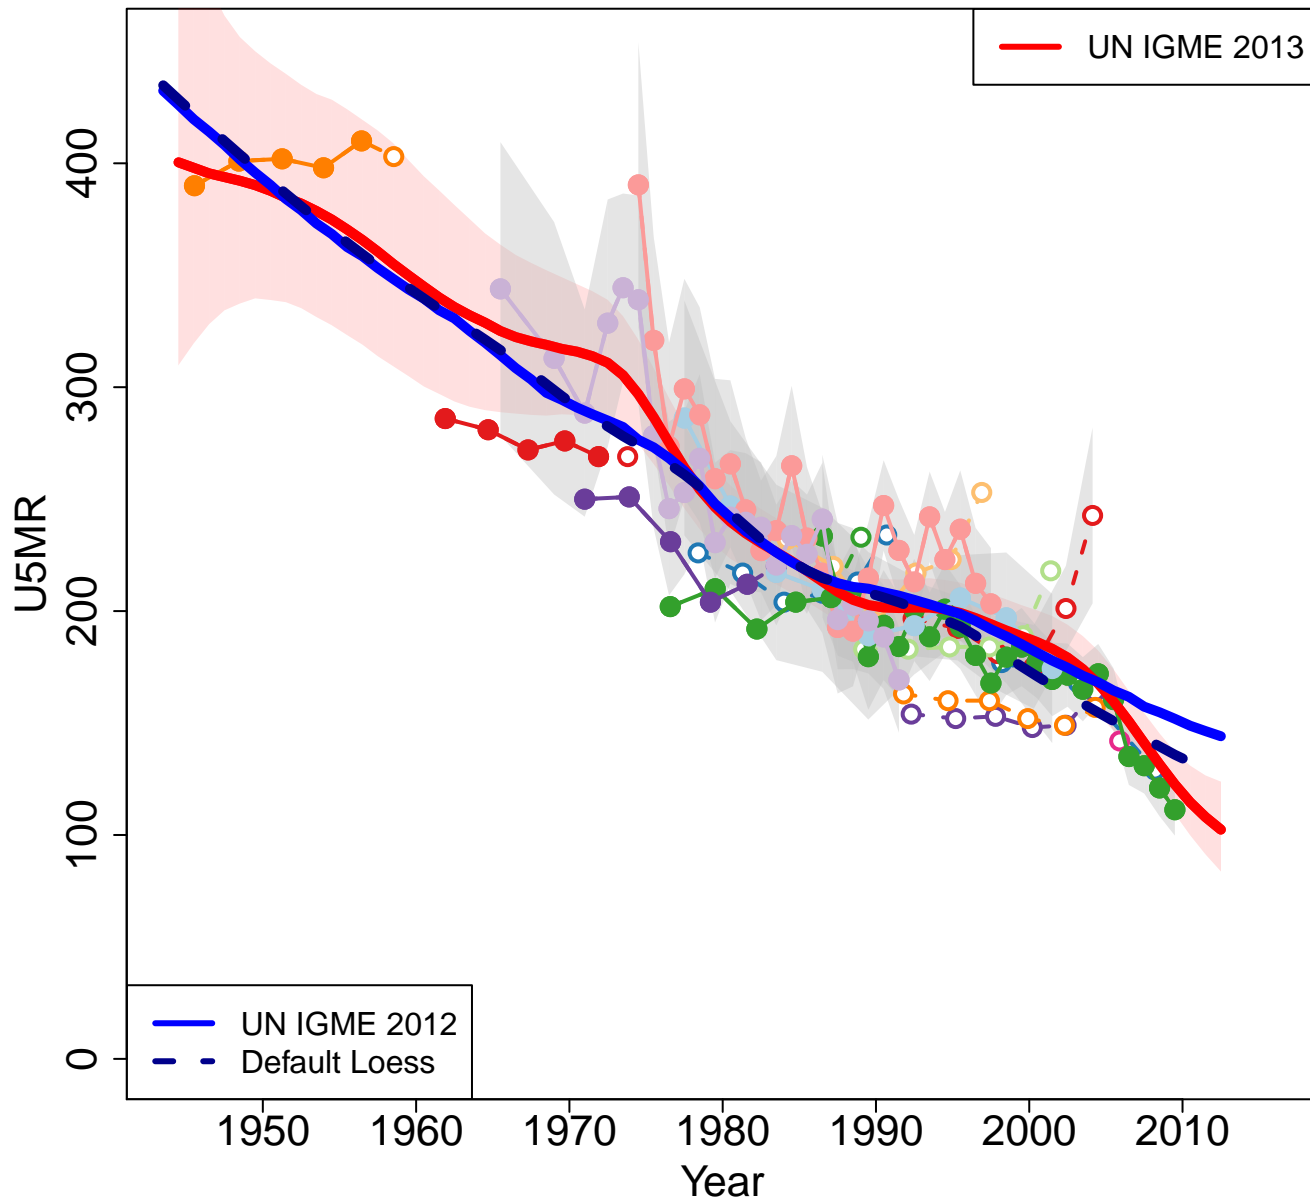

# Zoomed in

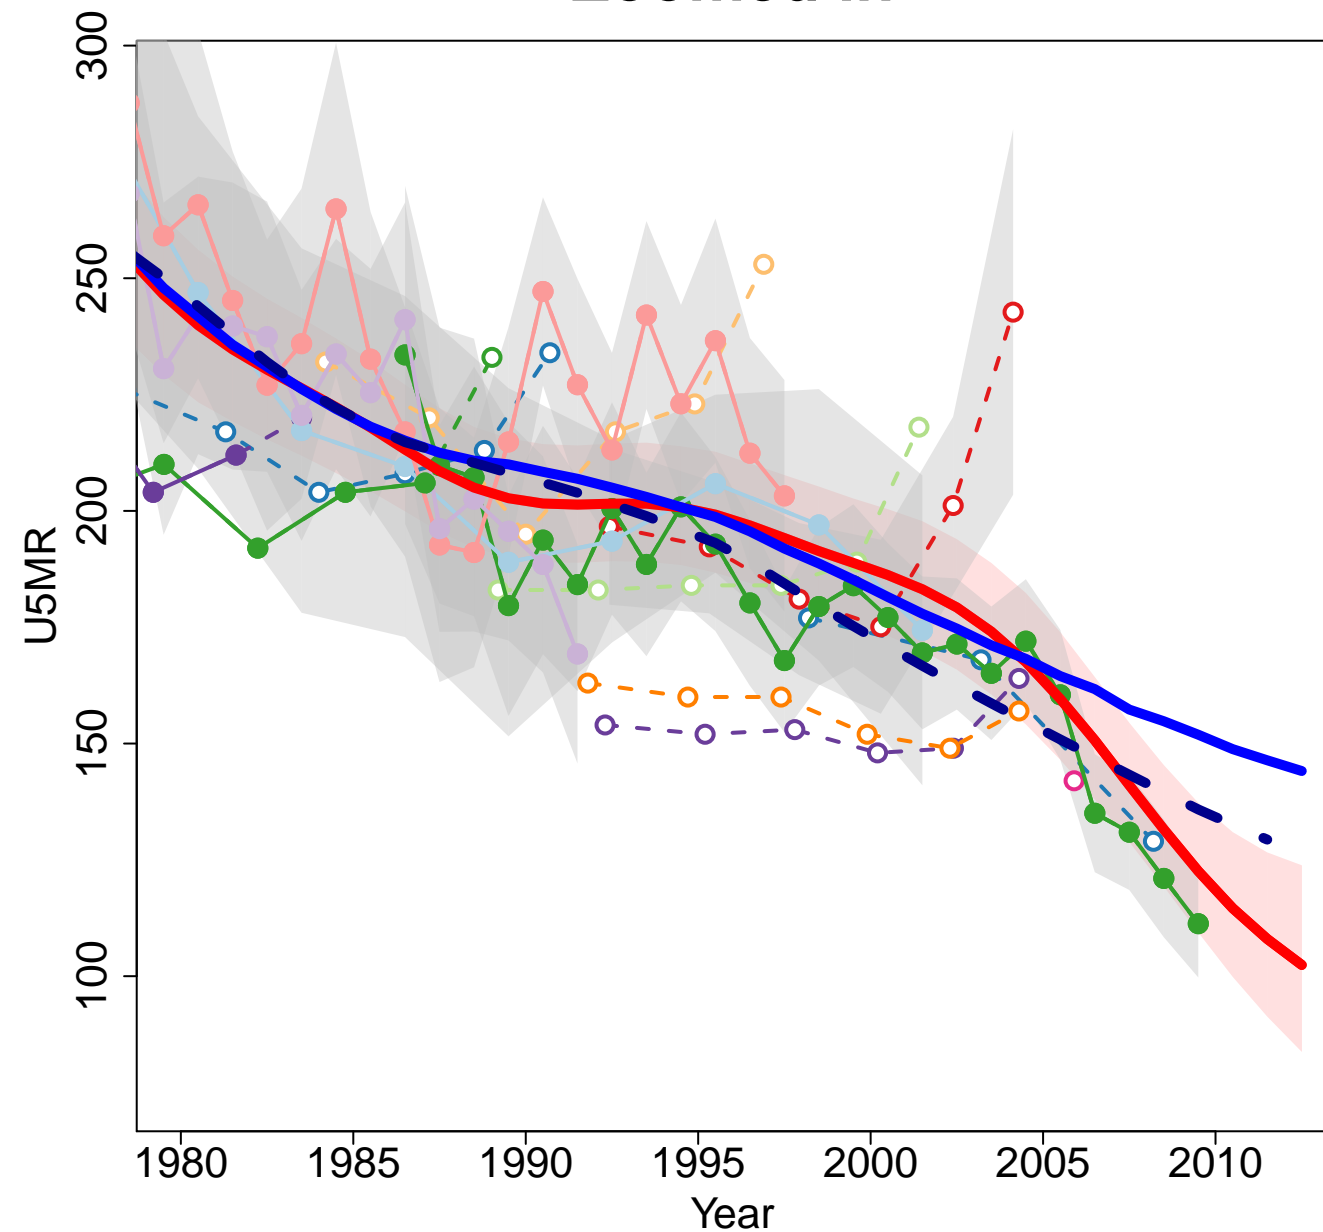

- Survey 1960–1961 (Others Indirect)
- Post-Enumeration Survey 1976 (Others Indirect)
- Census 1985 (Census Indirect)
- Survey 1991 (Others Indirect)
- Demographic and Health Survey 1992–1993 (DHS Indirect)
- Demographic and Health Survey 1992–1993 (DHS Direct)
- Demographic and Health Survey 1998–1999 (DHS Indirect)
- Demographic and Health Survey 1998–1999 (DHS Direct)
- Demographic and Health Survey 2003 (DHS Indirect)
- Demographic and Health Survey 2003 (DHS Direct)
- Recensement General de la Population et de l'Habitat (RGPH) 2005 (Others Household)
- Census 2006 (Census Indirect)
- Multiple Indicator Cluster Survey 2006 (MICS Indirect)
- Recensement General de la Population et de l'Habitat (RGPH) 2006 (Census Indirect)
- Demographic and Health Survey 2010 (DHS Direct)
- Demographic and Health Survey (Preliminary) 2010 (DHS Direct)

# Burundi

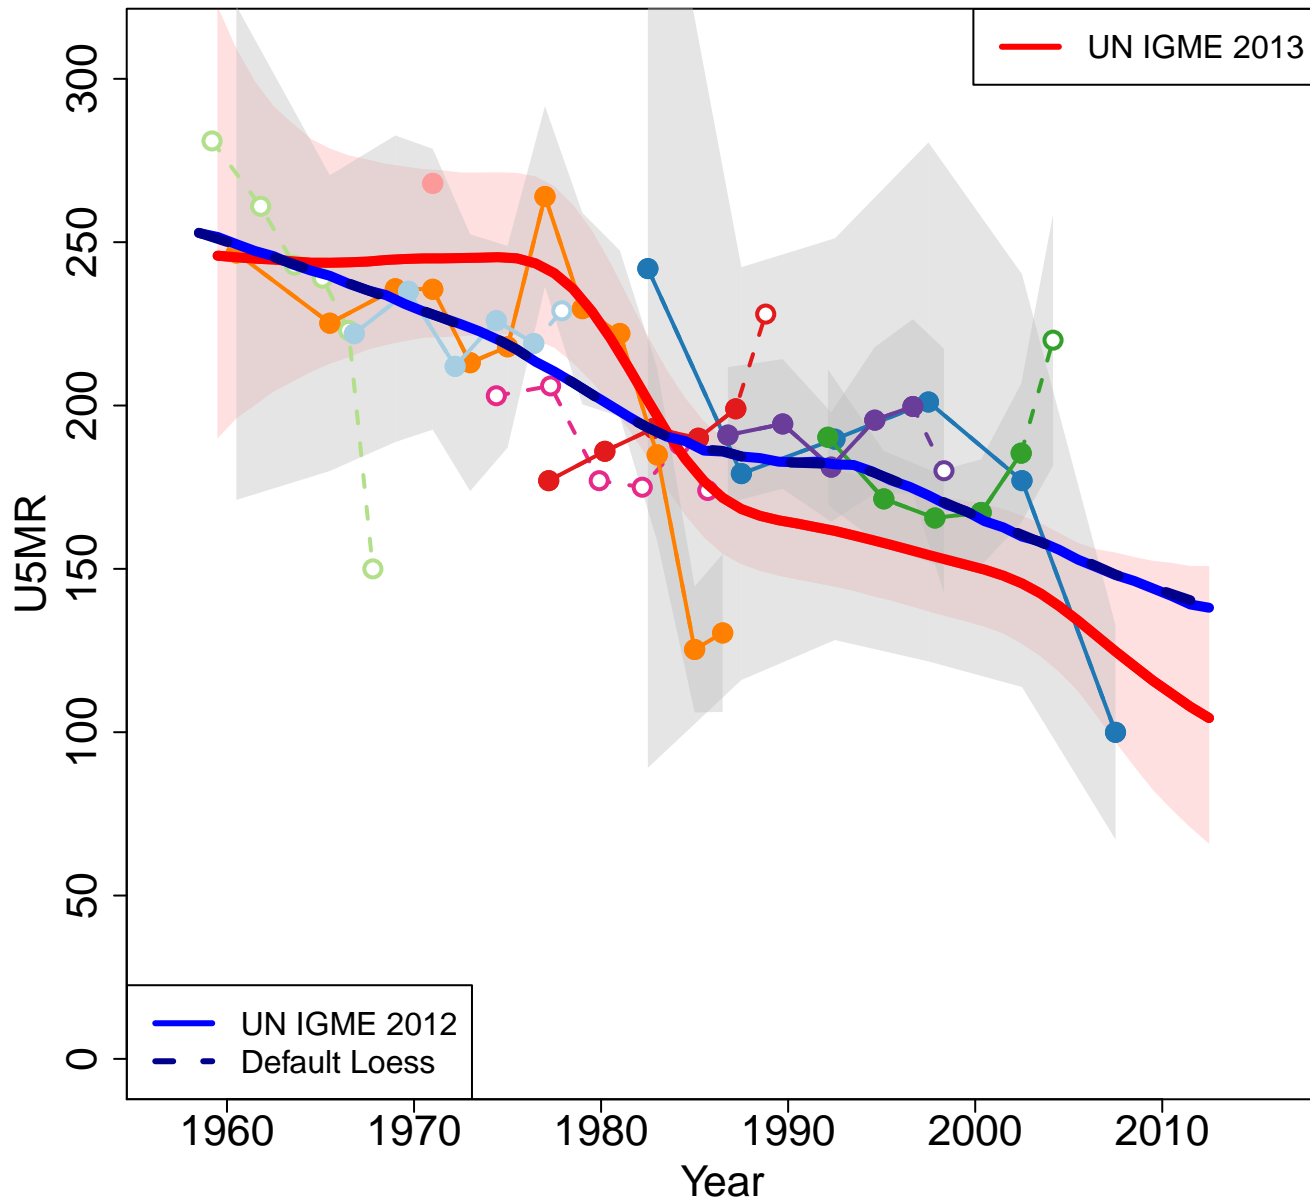

# Zoomed in

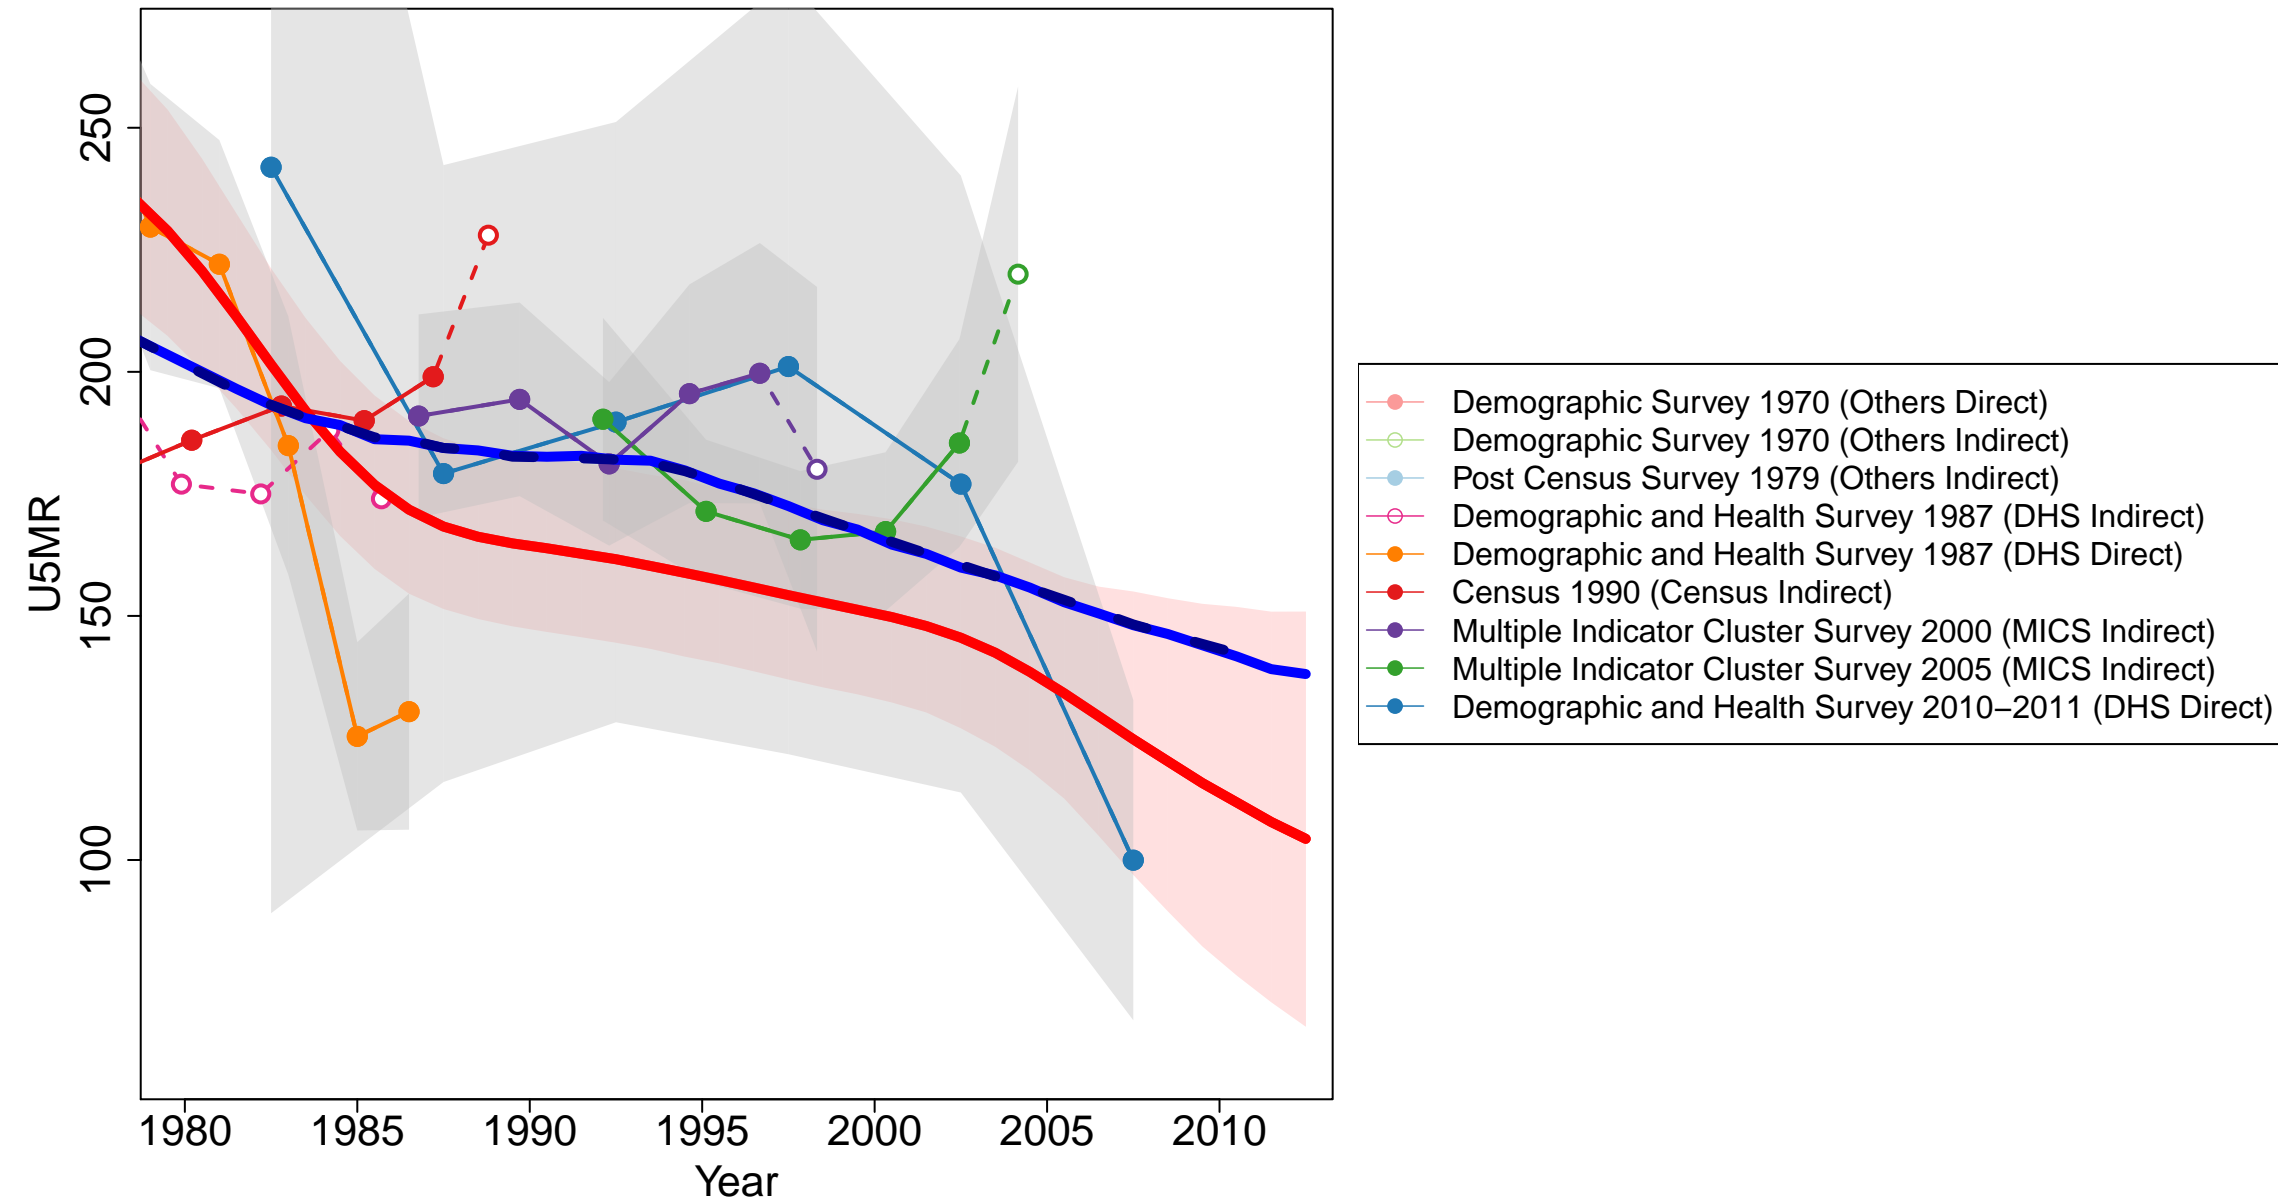

- Demographic Survey 1970 (Others Direct)
- Demographic Survey 1970 (Others Indirect)
- Post Census Survey 1979 (Others Indirect)
- Demographic and Health Survey 1987 (DHS Indirect)
- Demographic and Health Survey 1987 (DHS Direct)
- Census 1990 (Census Indirect)
- Multiple Indicator Cluster Survey 2000 (MICS Indirect)
- Multiple Indicator Cluster Survey 2005 (MICS Indirect)
- Demographic and Health Survey 2010–2011 (DHS Direct)

# Cambodia

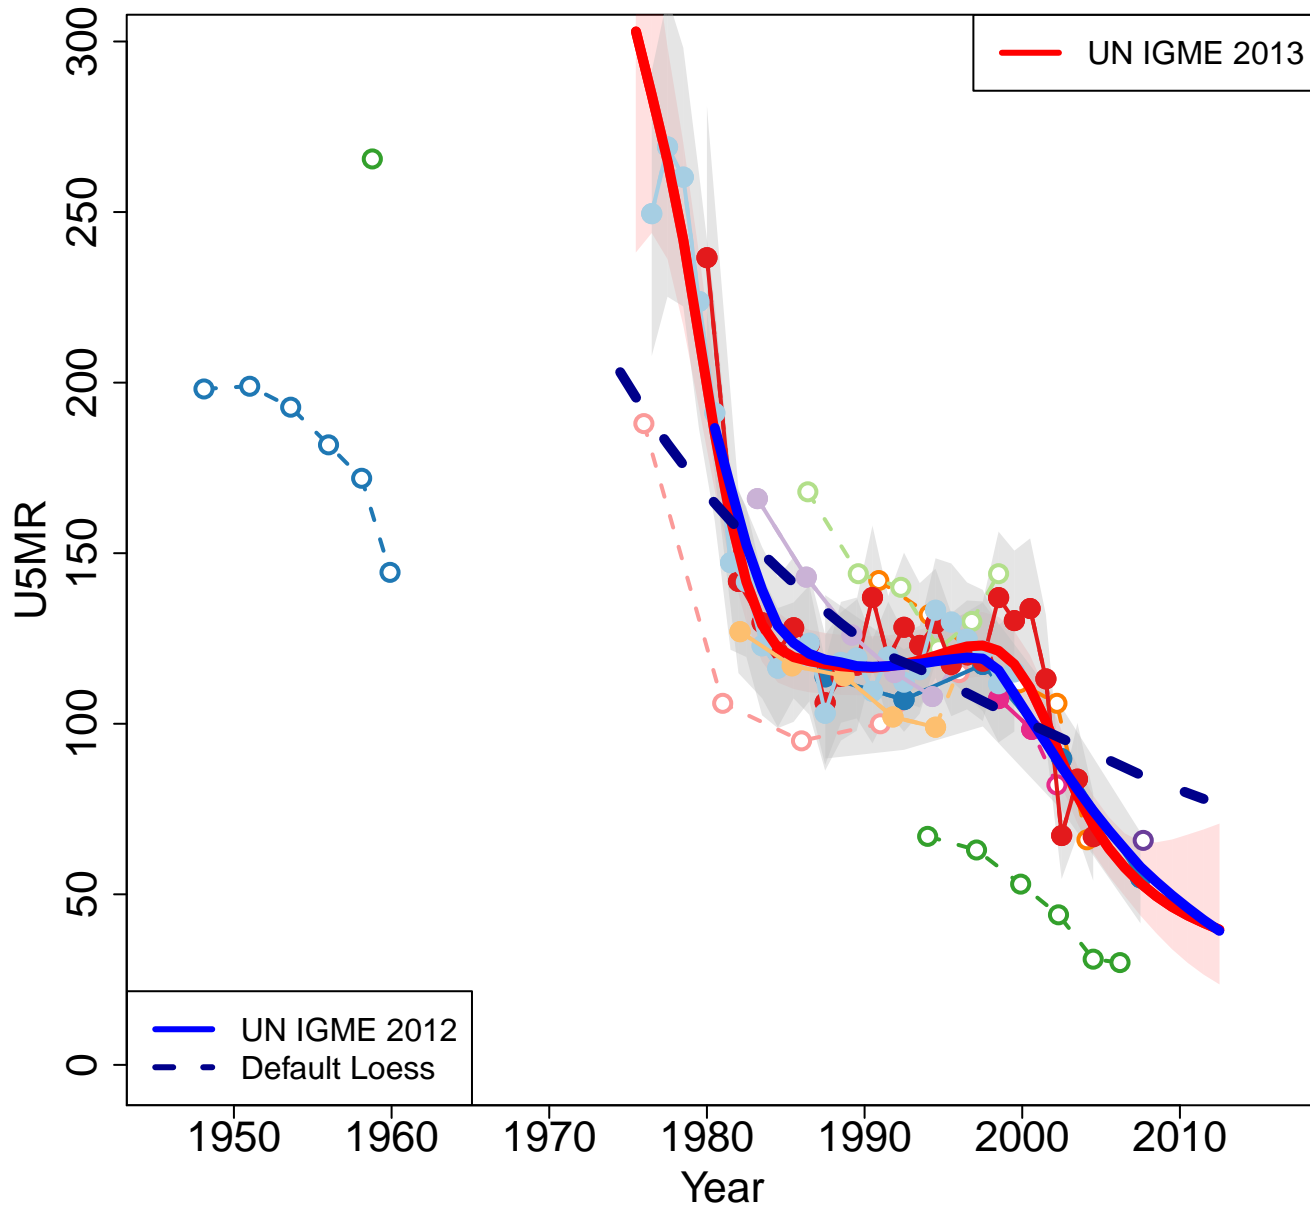

# Zoomed in

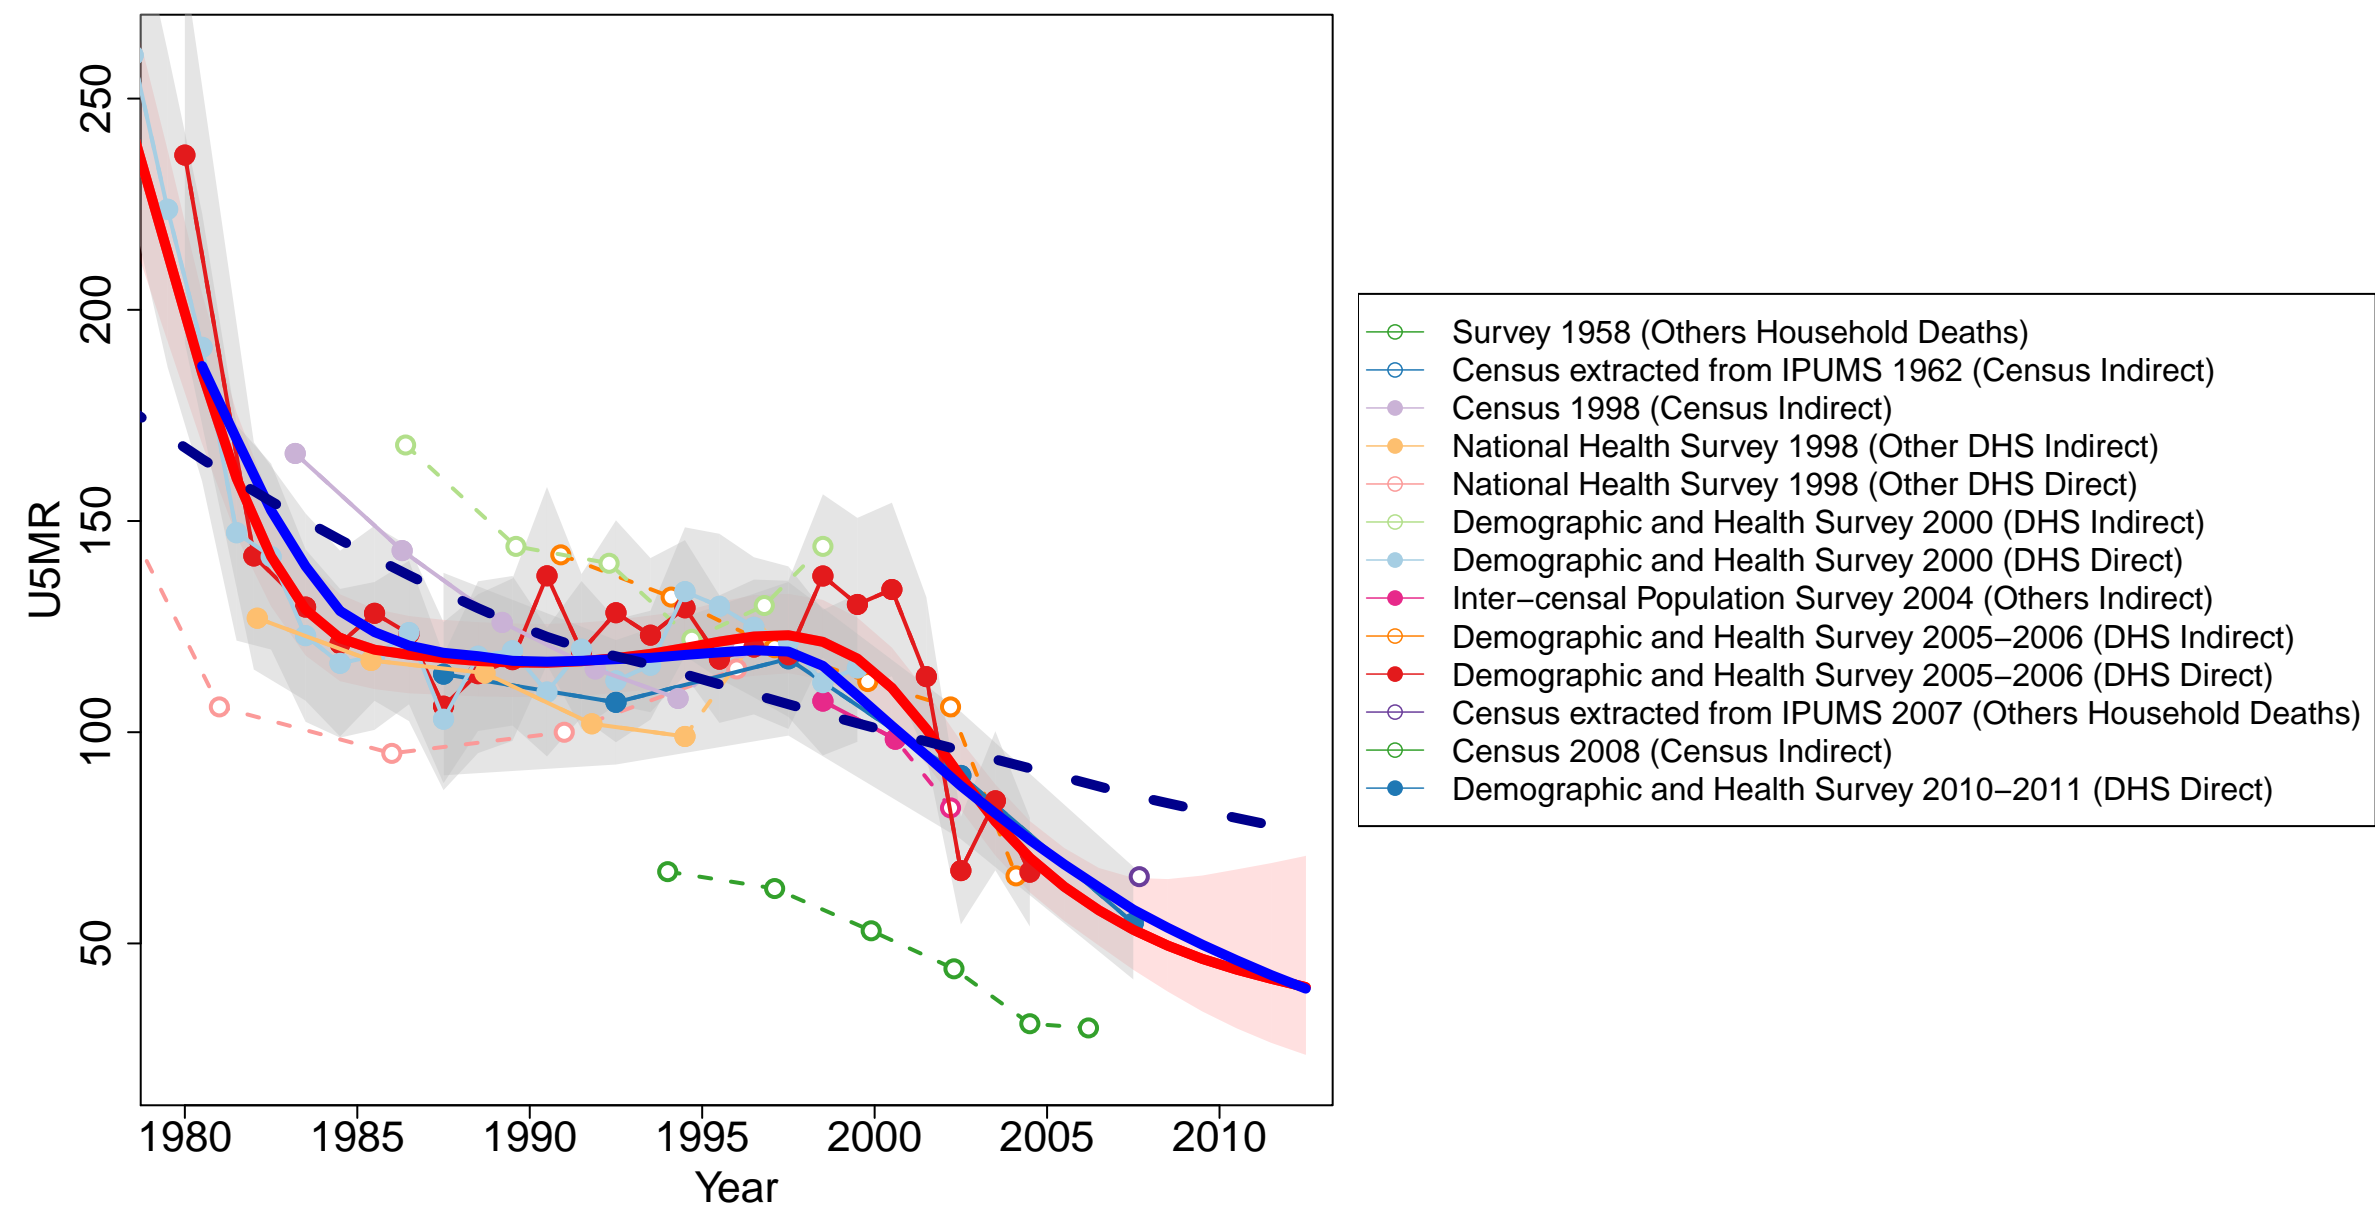



# Cape Verde

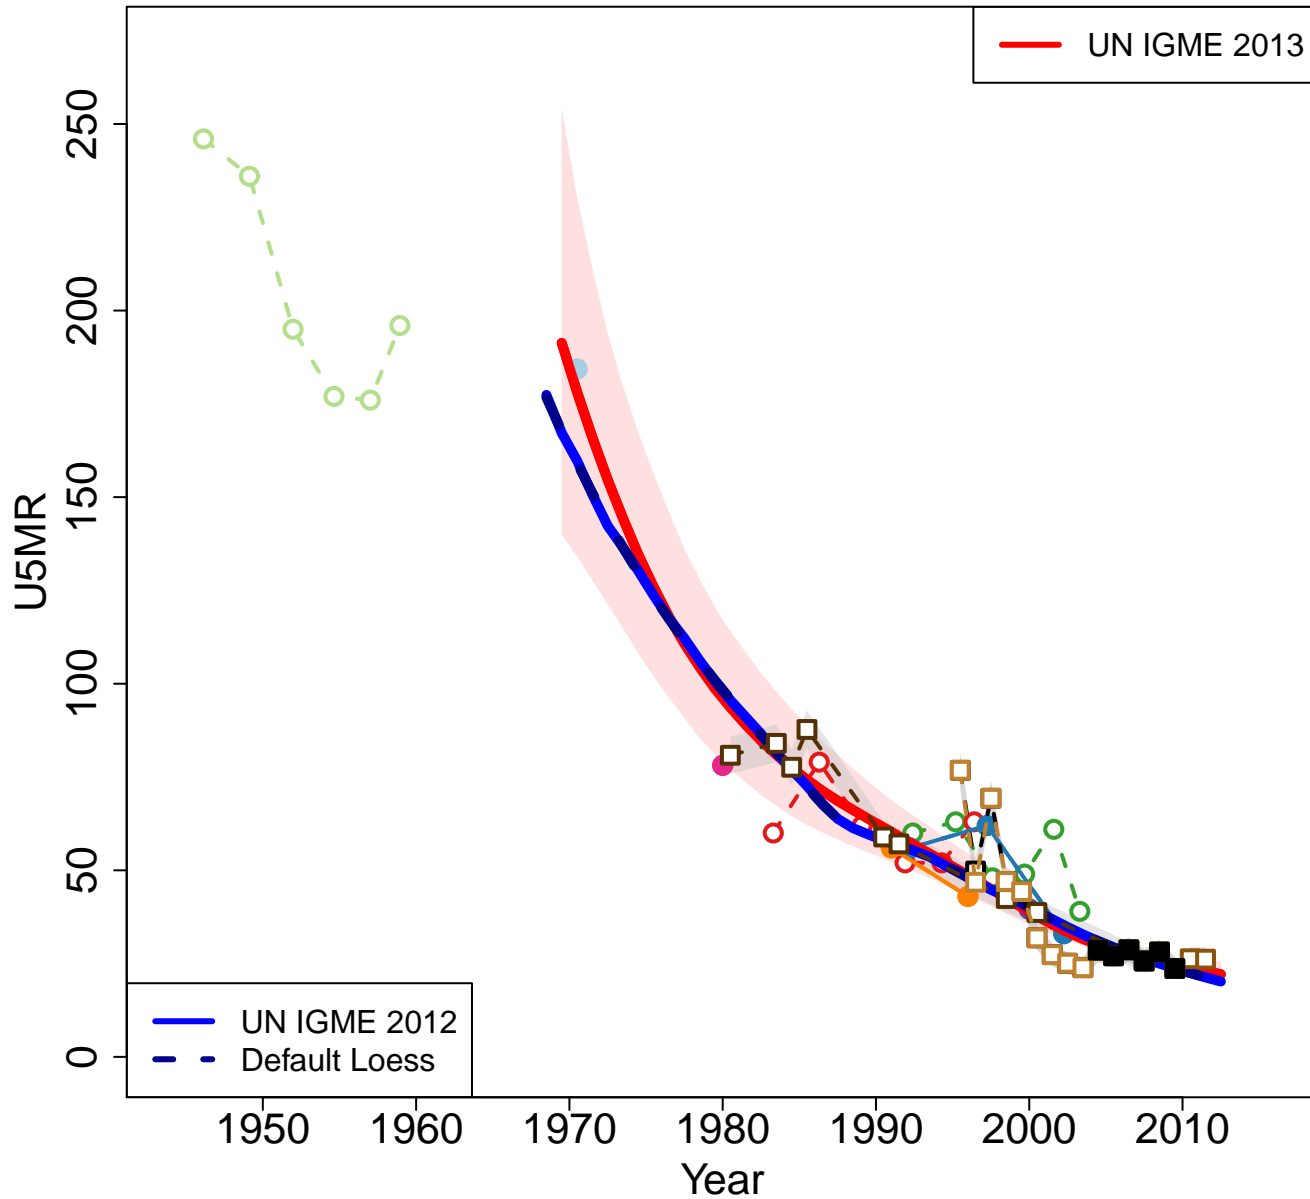

# Zoomed in

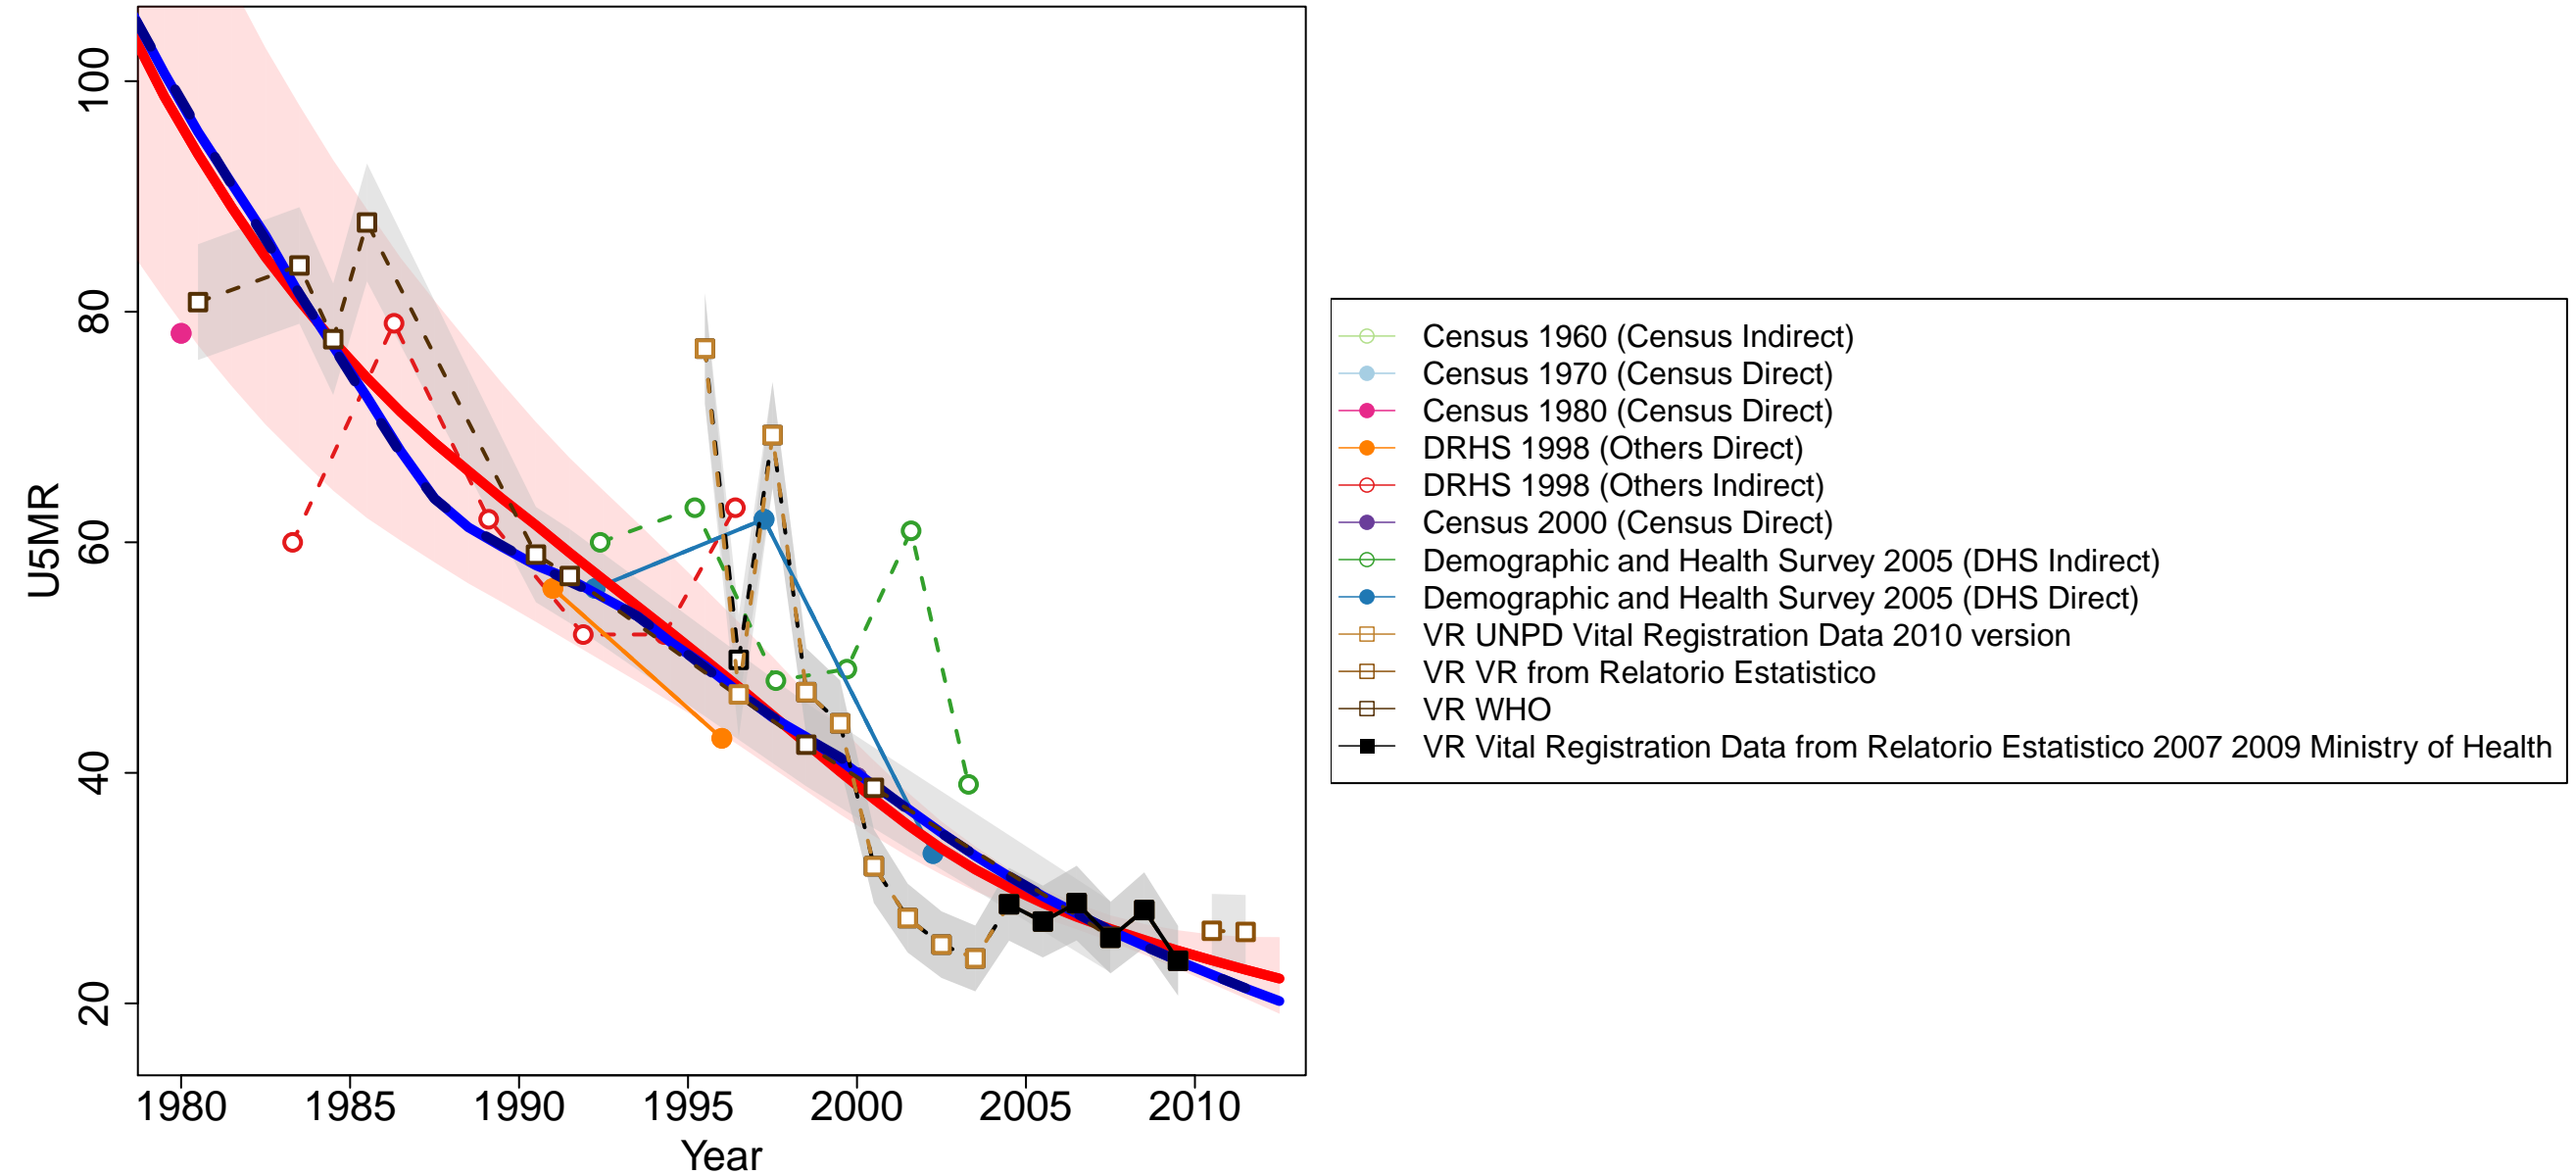



# Chad

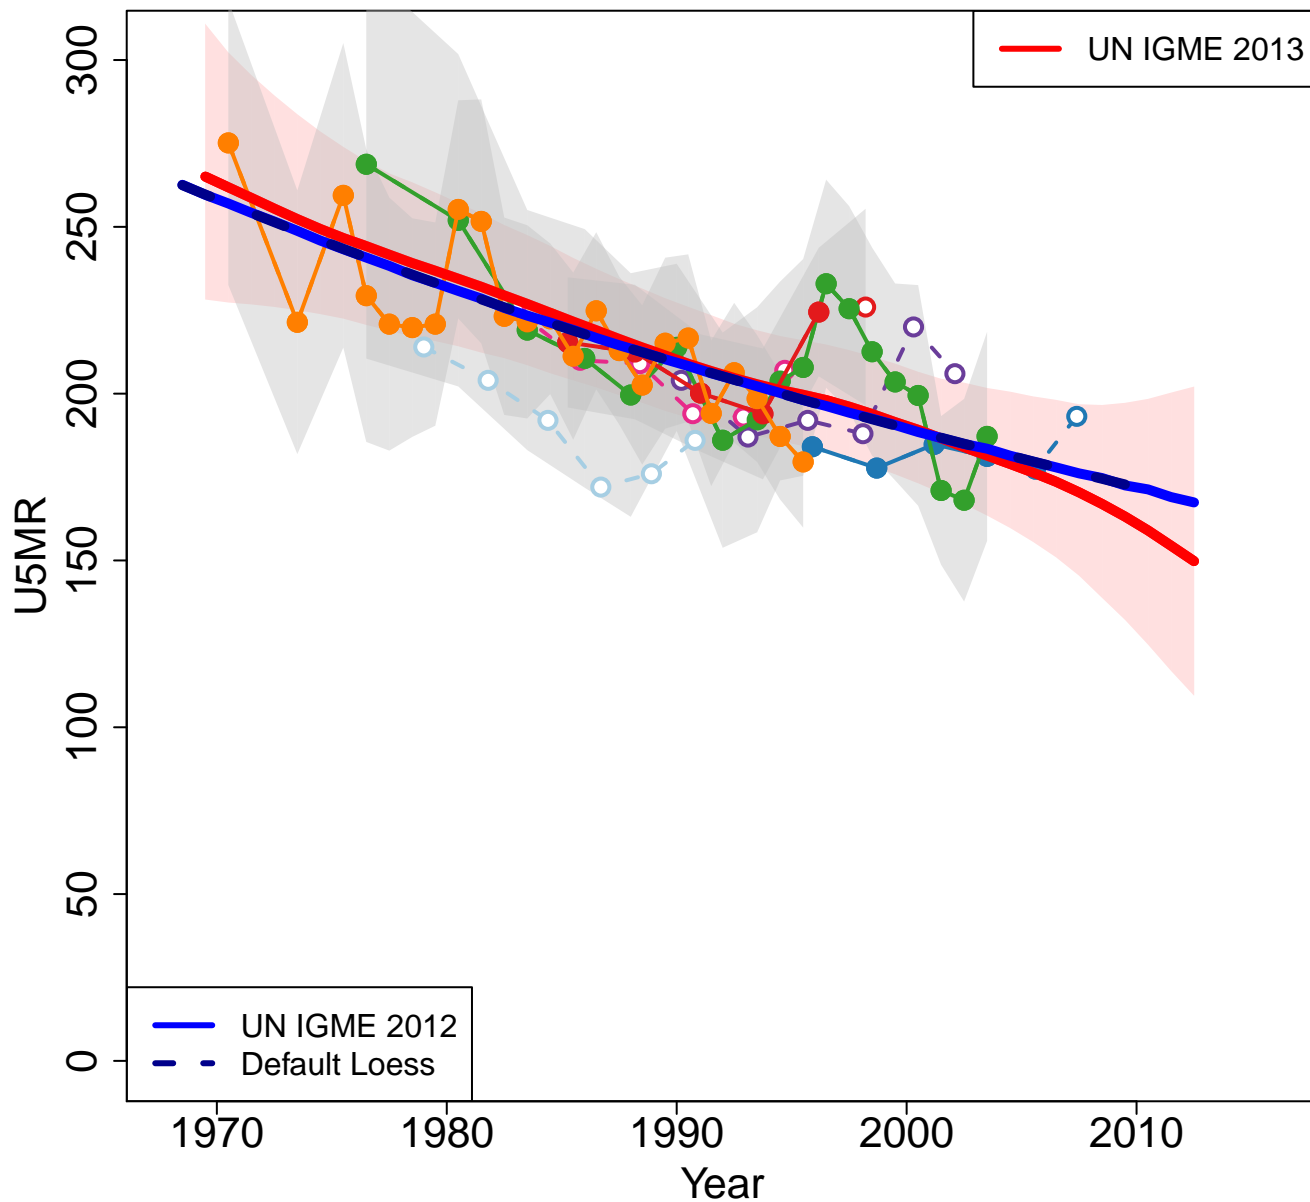

# Zoomed in

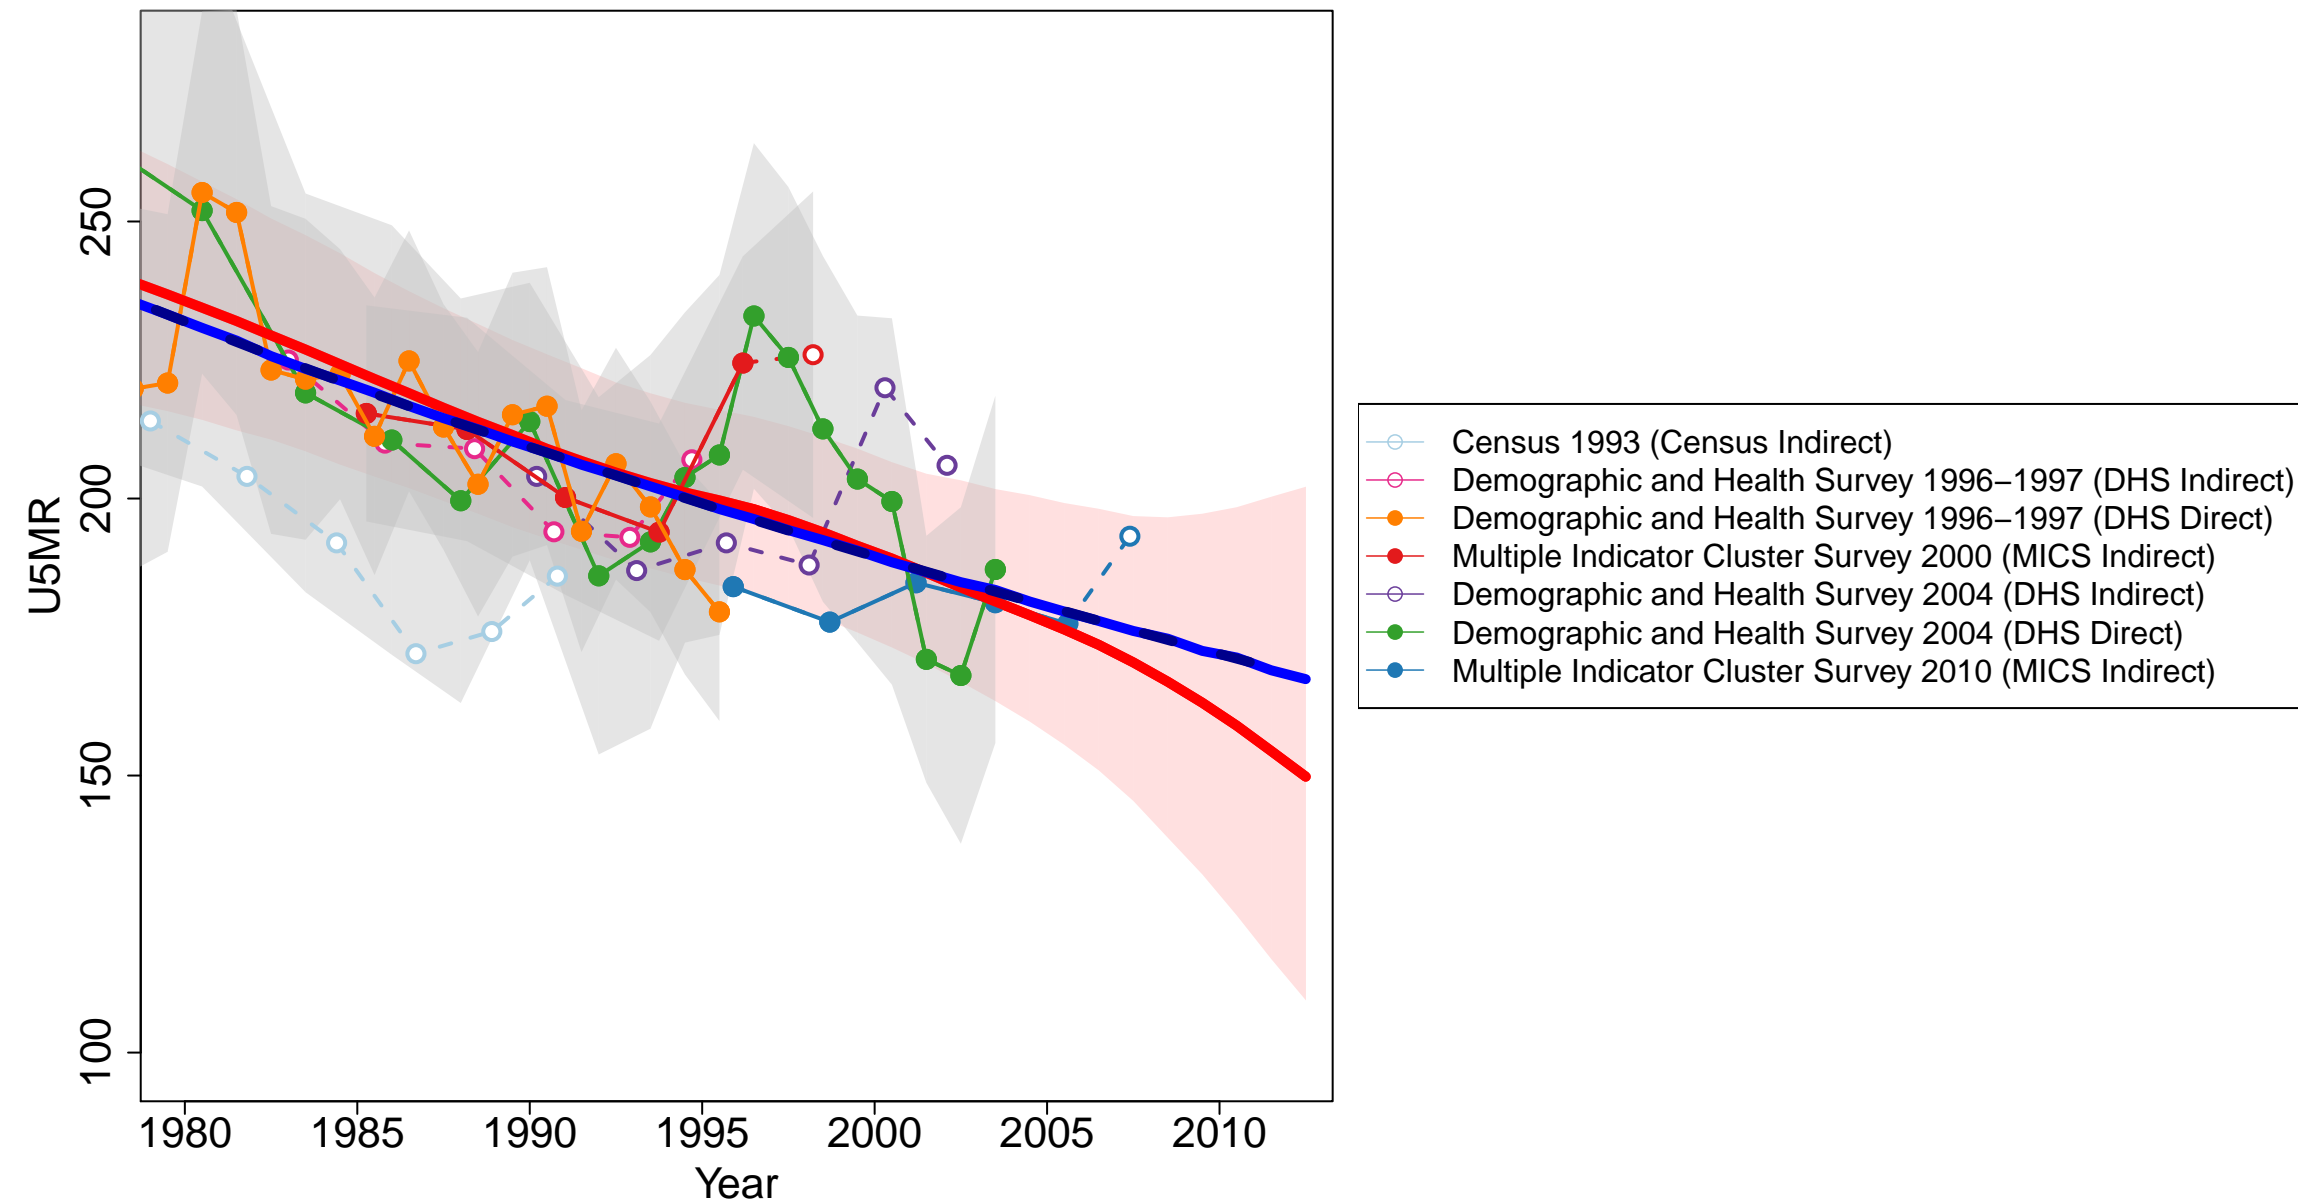

# Chile

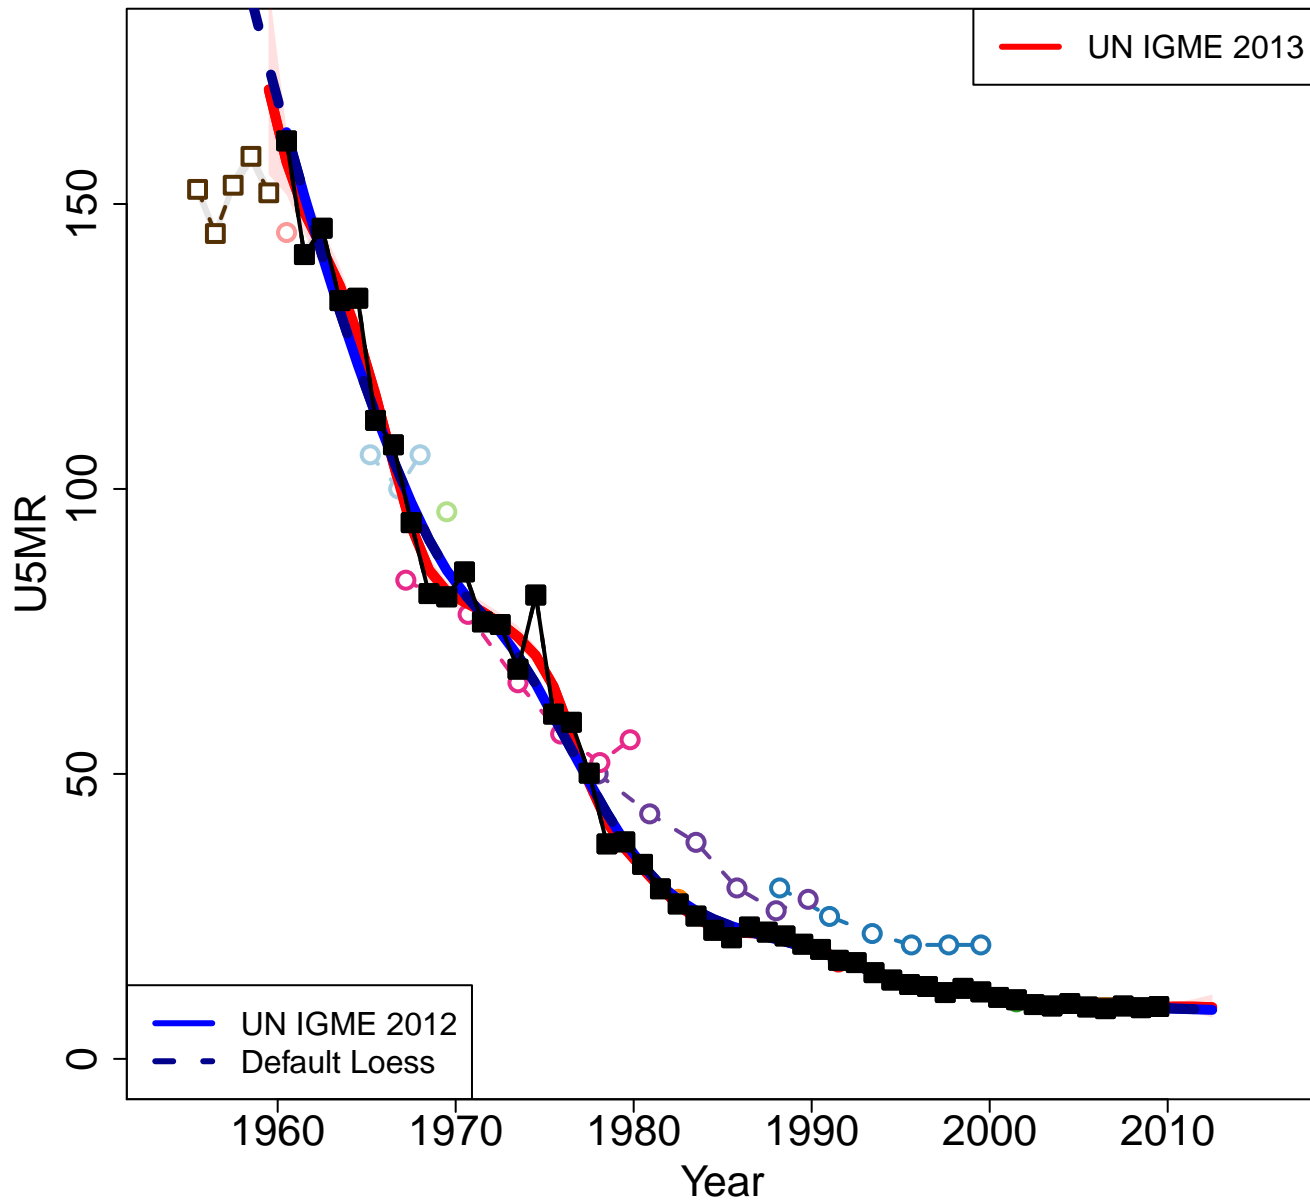

# Zoomed in

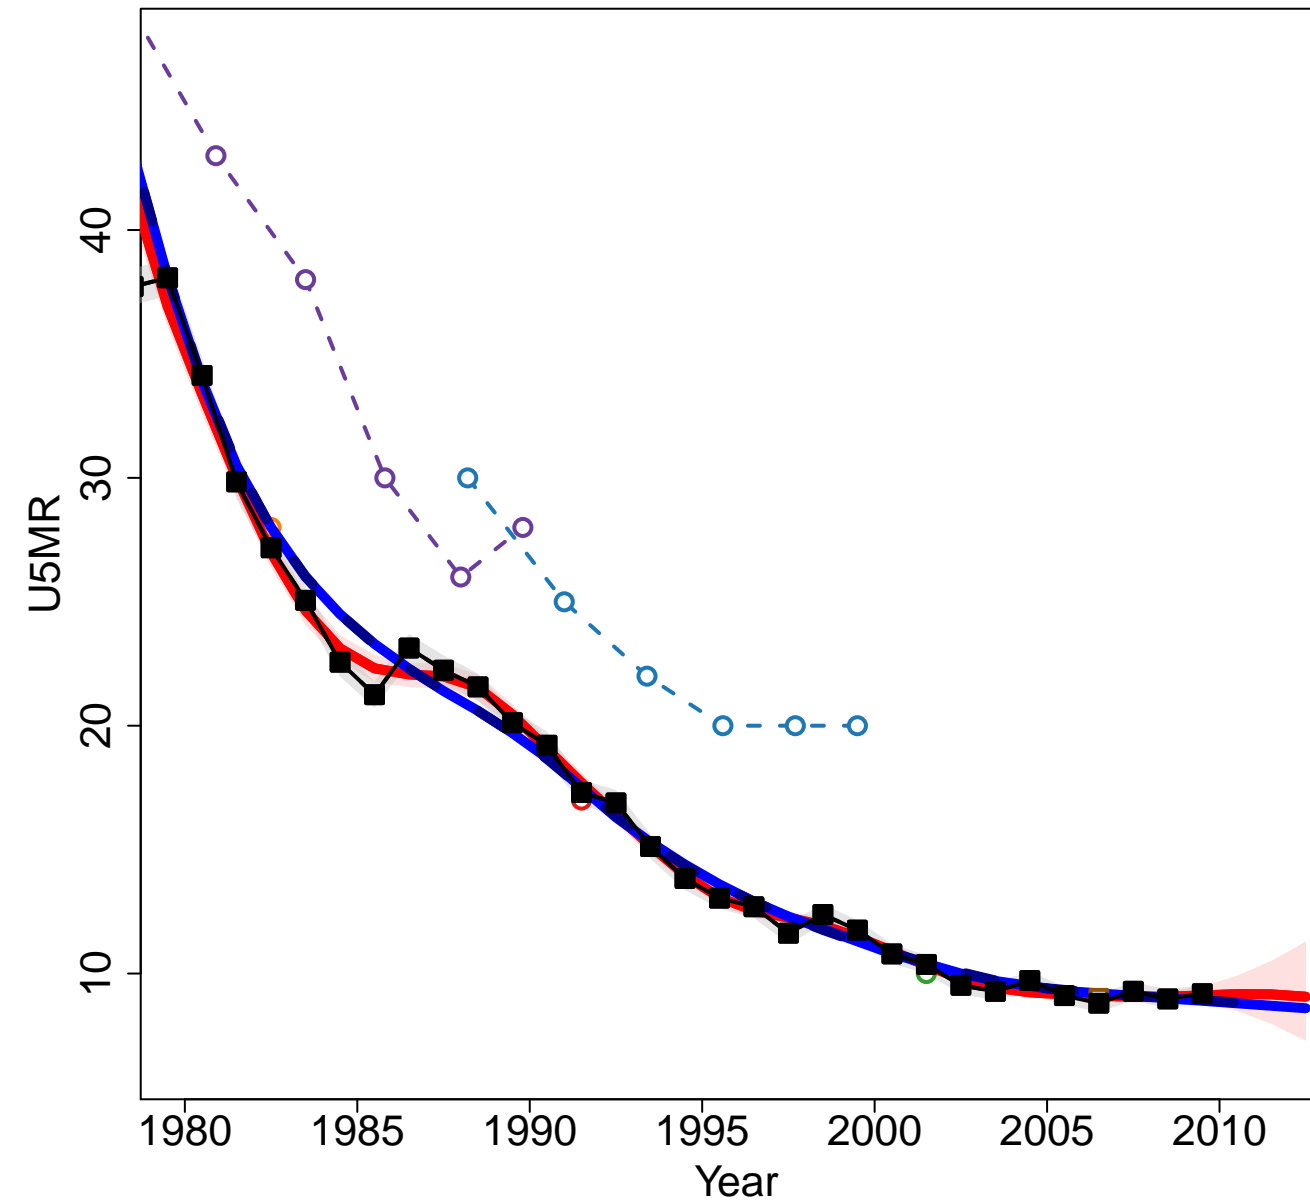

# China

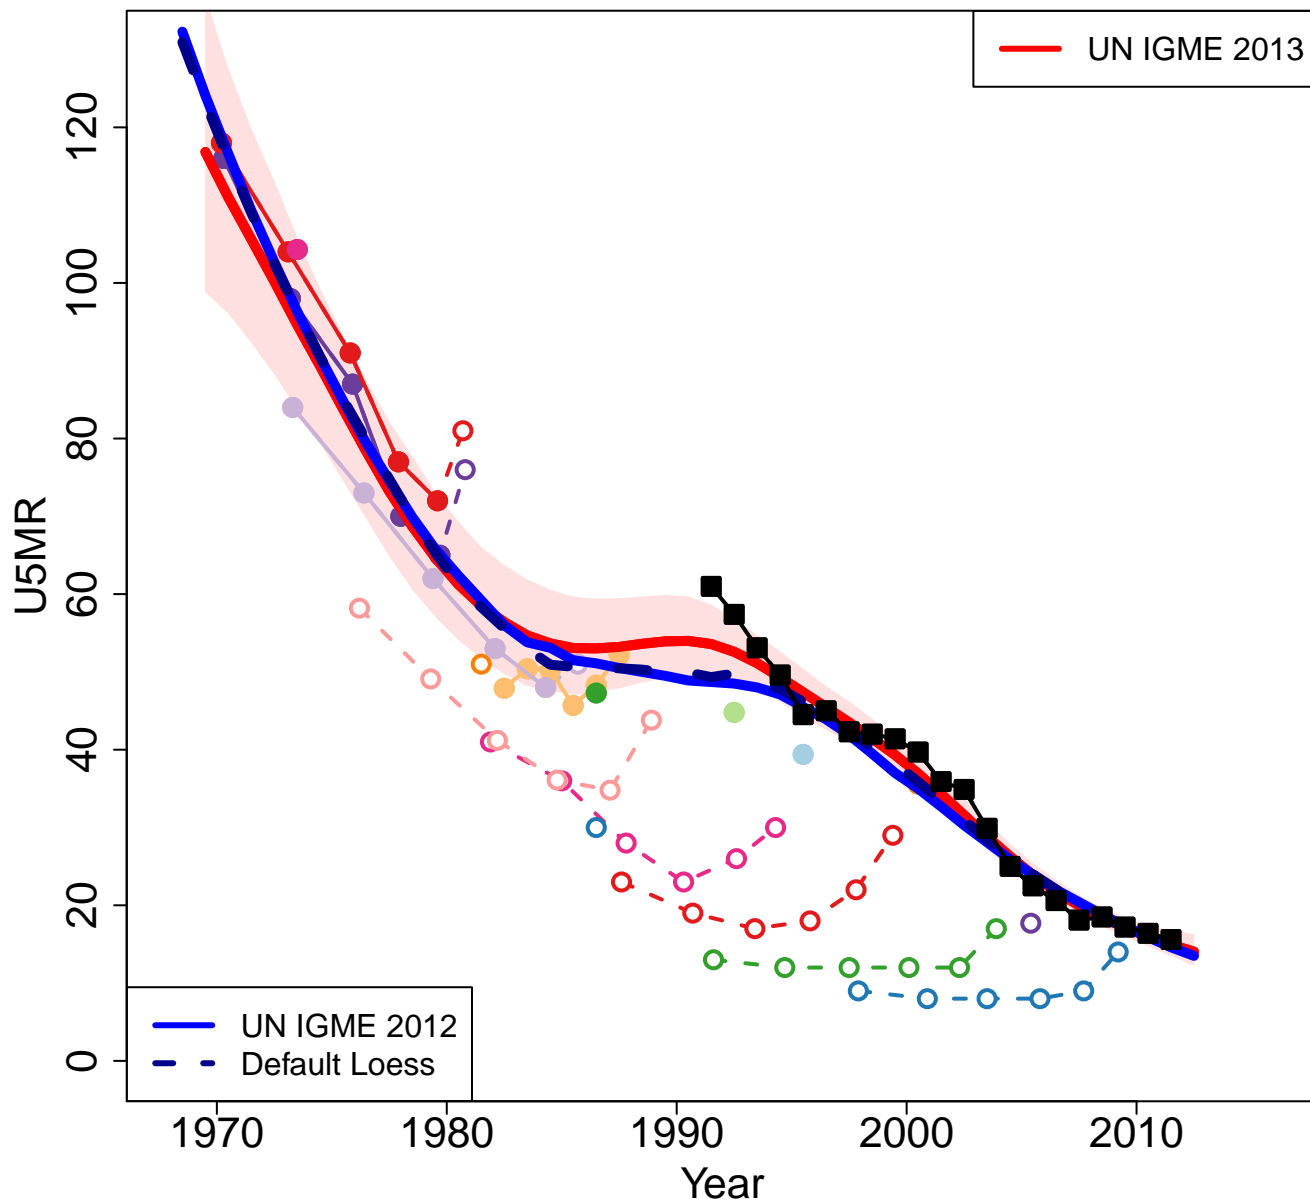

# Zoomed in

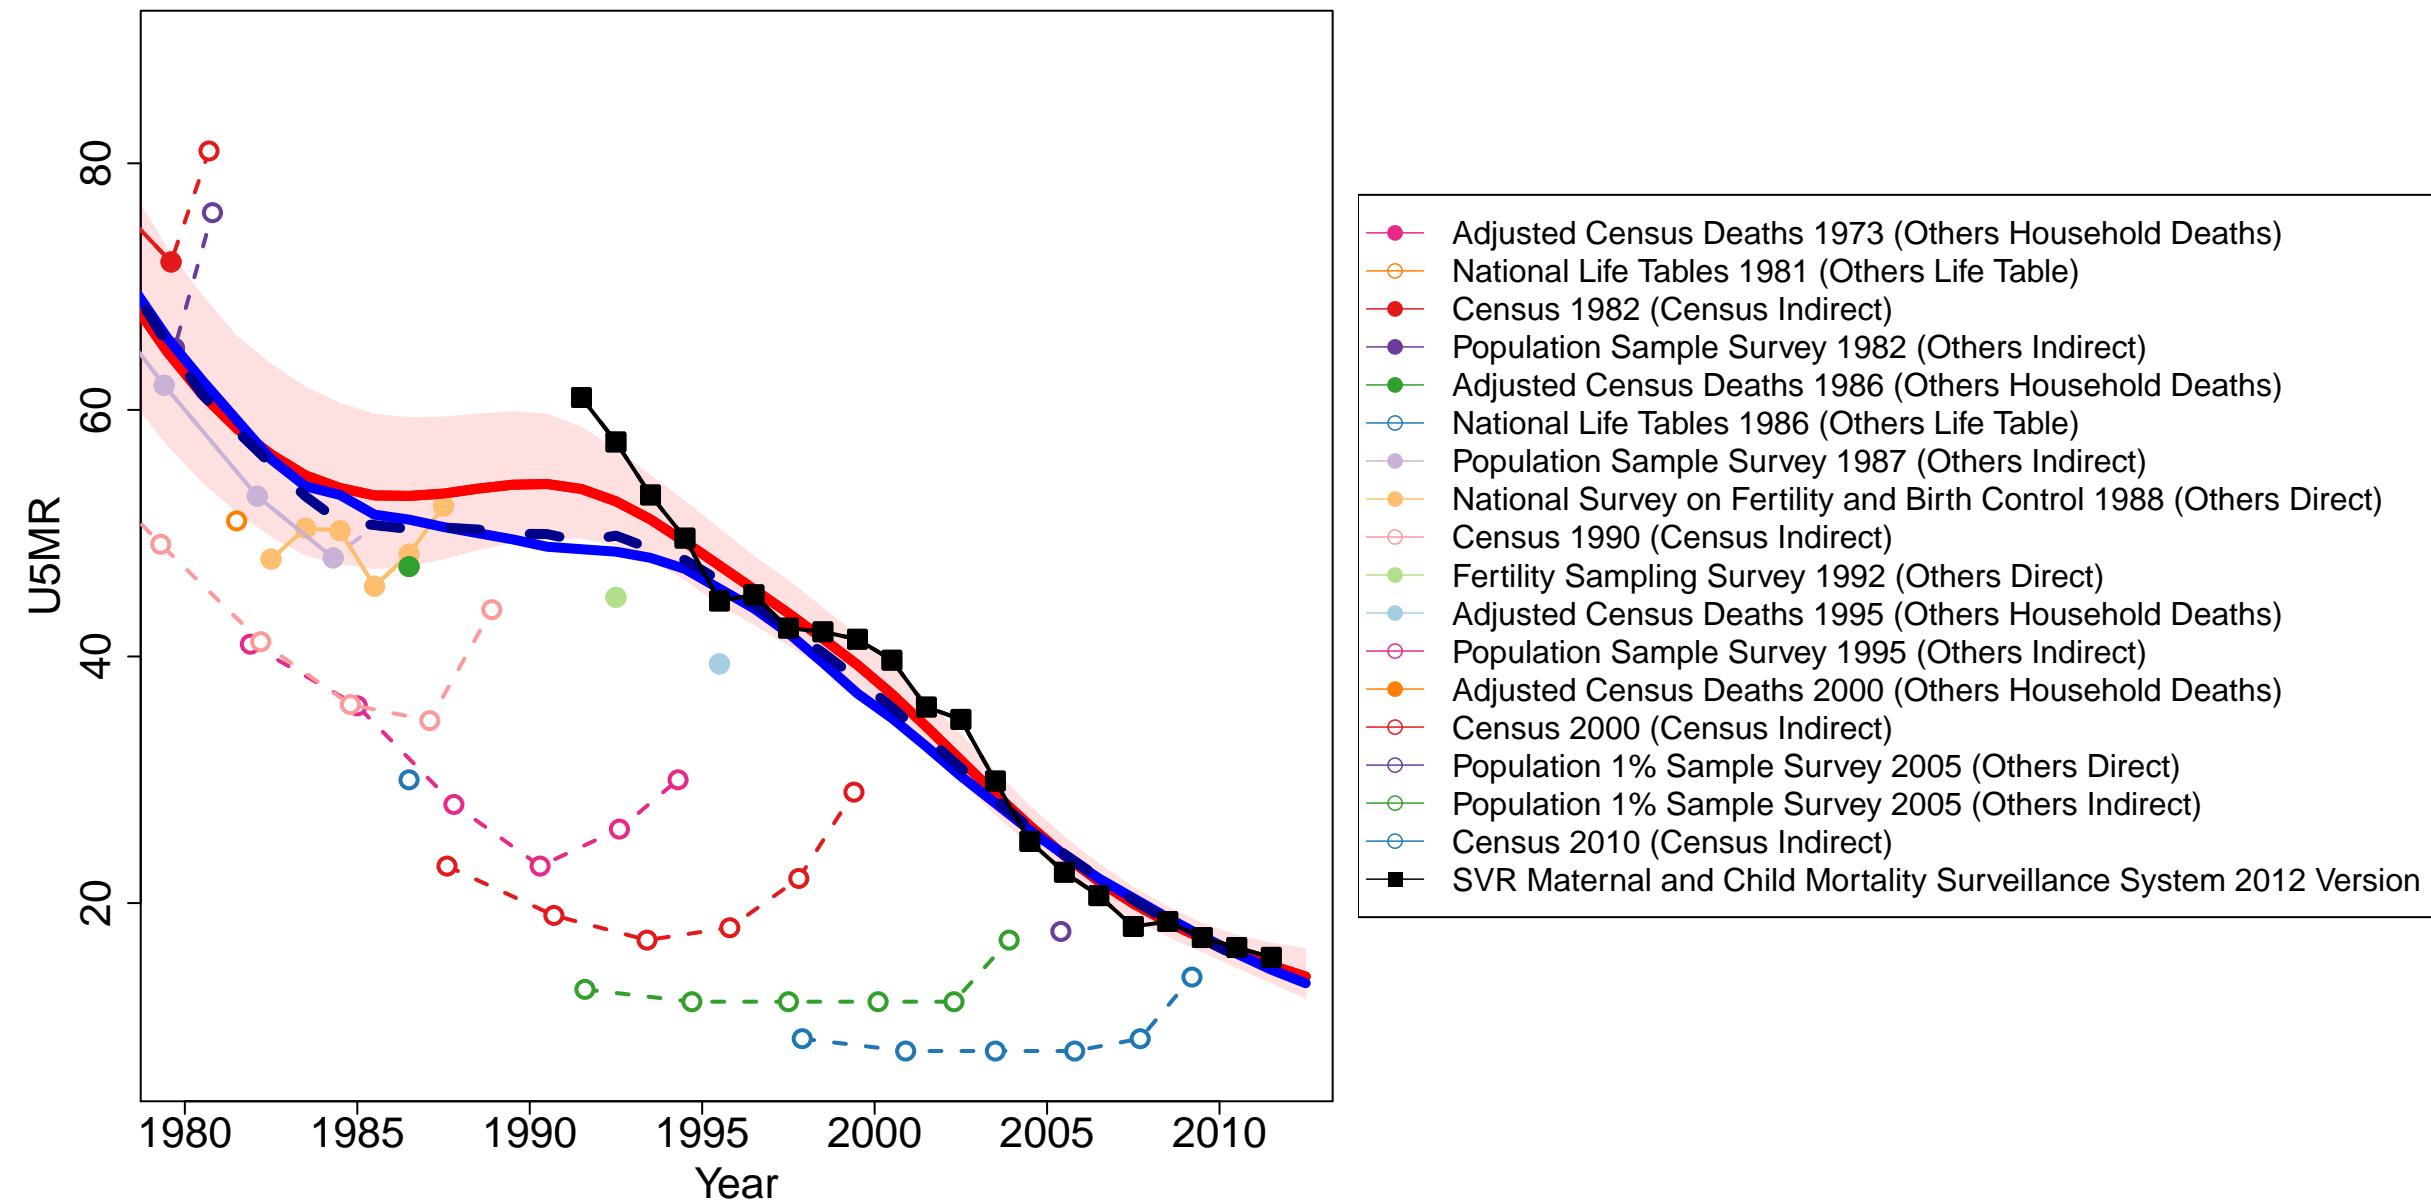

# Colombia

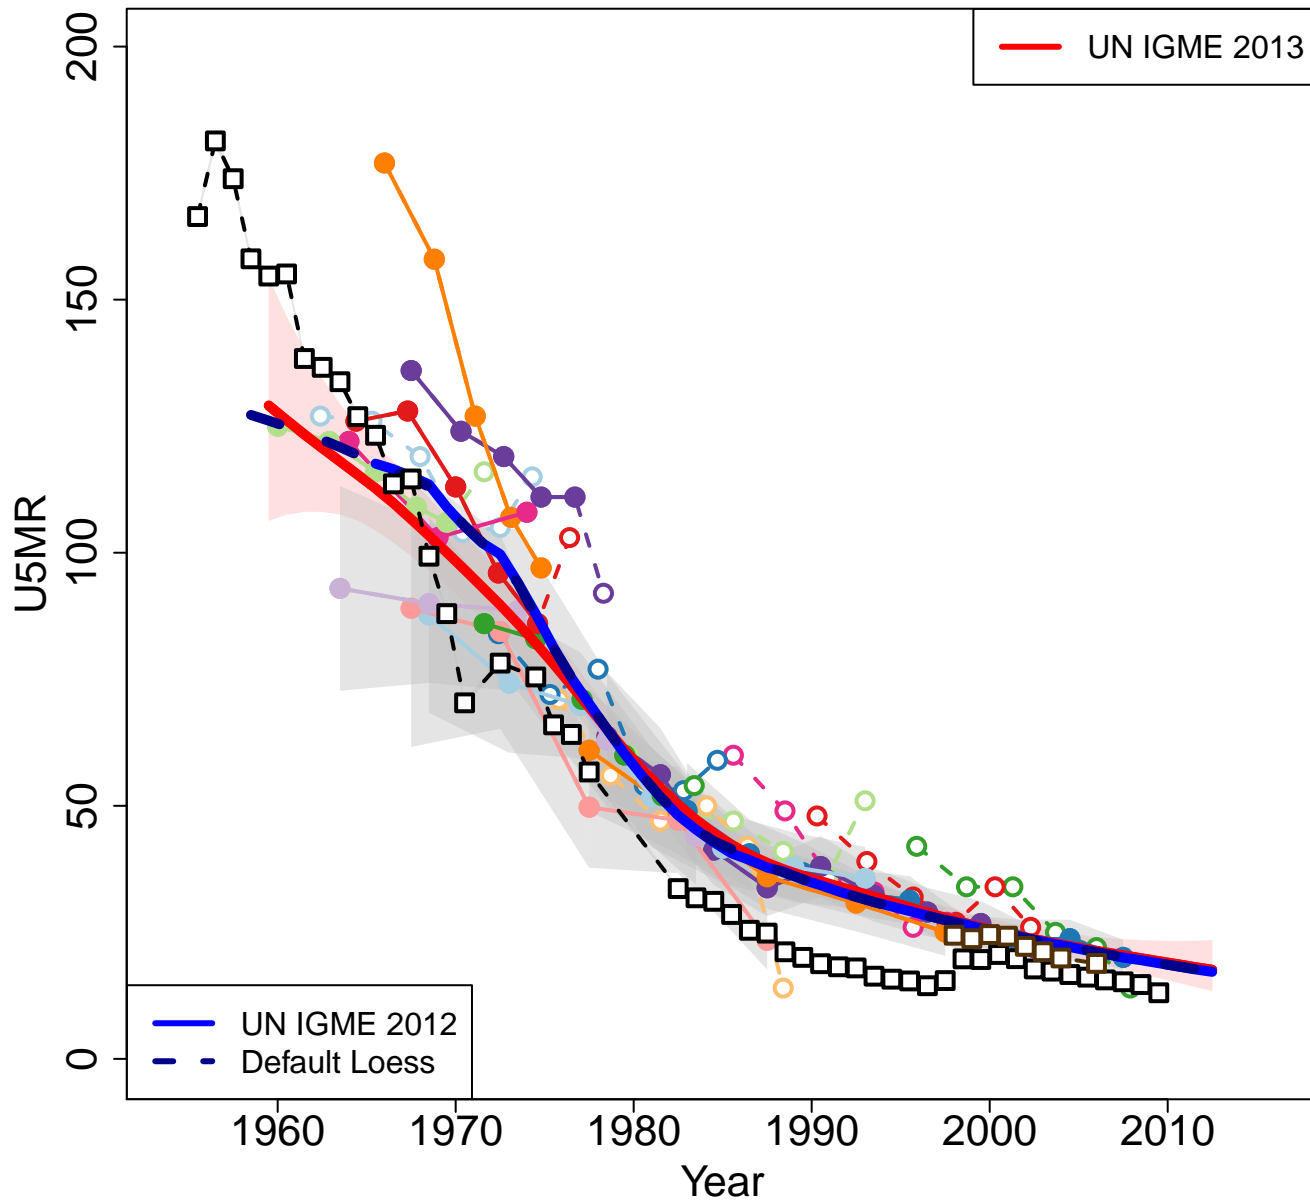

# Zoomed in

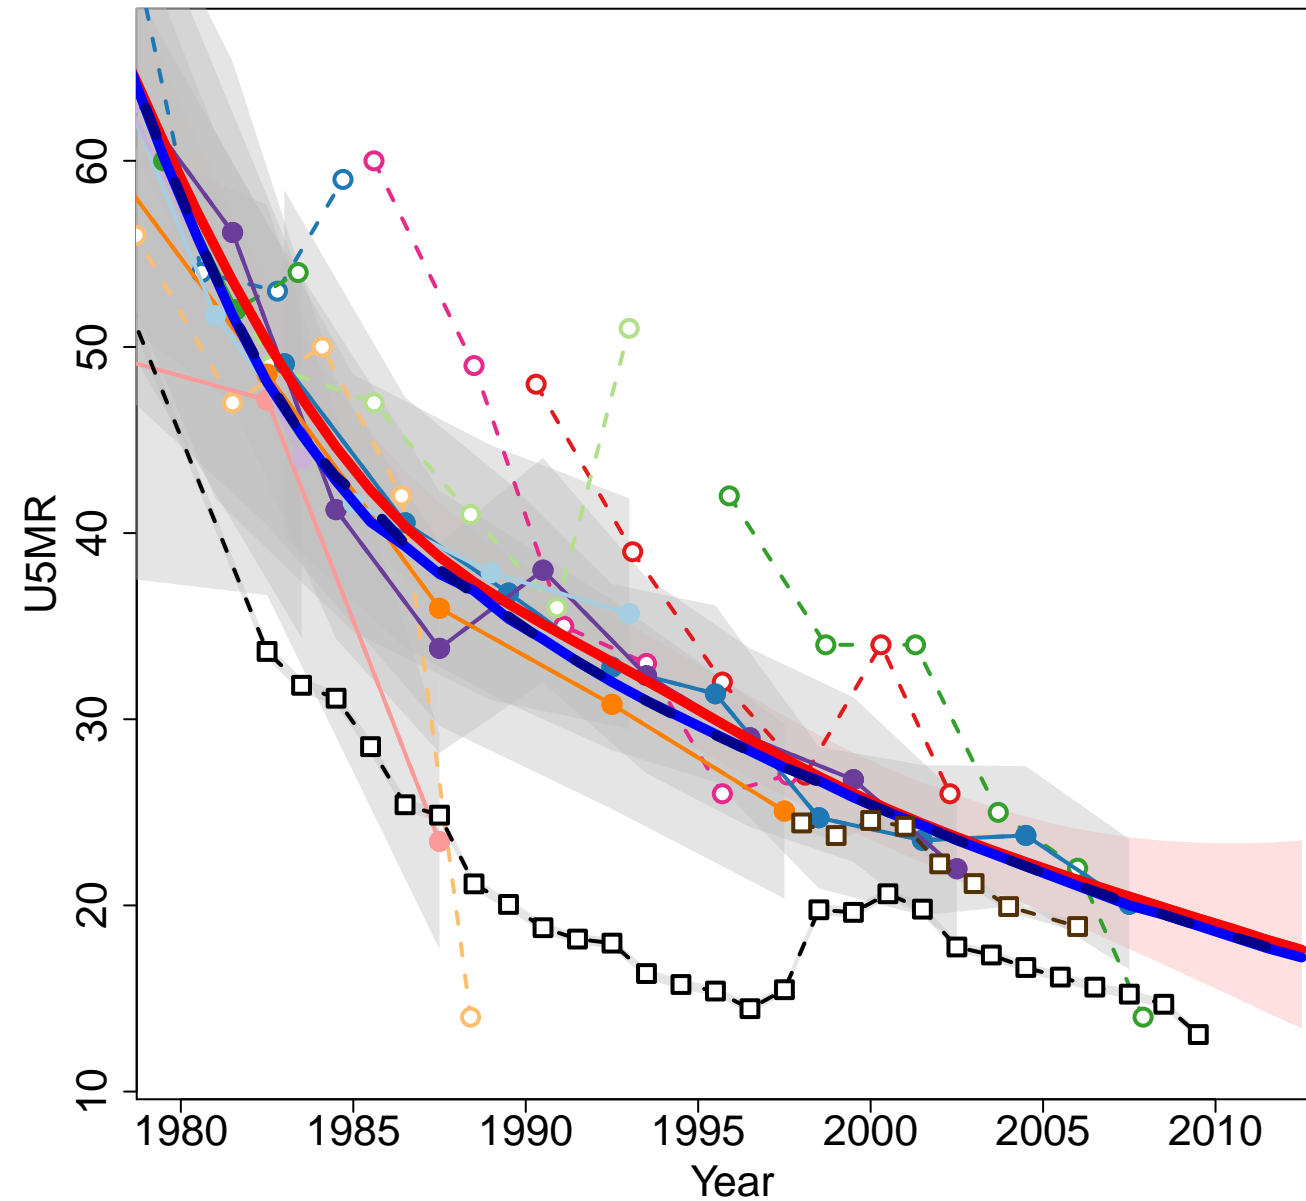

- Census 1973 (Census Indirect)
- World Fertility Survey 1976 (Other DHS Indirect)
- World Fertility Survey 1976 (Other DHS Direct)
- Contraceptive Prevalence Survey 1978 (Others Indirect)
- HOG 1978 (Others Indirect)
- HOG 1980 (Others Indirect)
- Census 1985 (Census Indirect)
- Demographic and Health Survey 1986 (DHS Indirect)
- Demographic and Health Survey 1986 (DHS Direct)
- Demographic and Health Survey 1990 (DHS Indirect)
- Demographic and Health Survey 1990 (DHS Direct)
- Demographic and Health Survey 1995 (DHS Indirect)
- Demographic and Health Survey 1995 (DHS Direct)
- Demographic and Health Survey 2000 (DHS Indirect)
- Demographic and Health Survey 2000 (DHS Direct)
- Demographic and Health Survey 2004–2005 (DHS Indirect)
- Demographic and Health Survey 2004–2005 (DHS Direct)
- Demographic and Health Survey 2009–2010 (DHS Indirect)
- Demographic and Health Survey 2009–2010 (DHS Direct)
- VR Vital Registration (Mexico March 2009)
- VR WHO

# Comoros

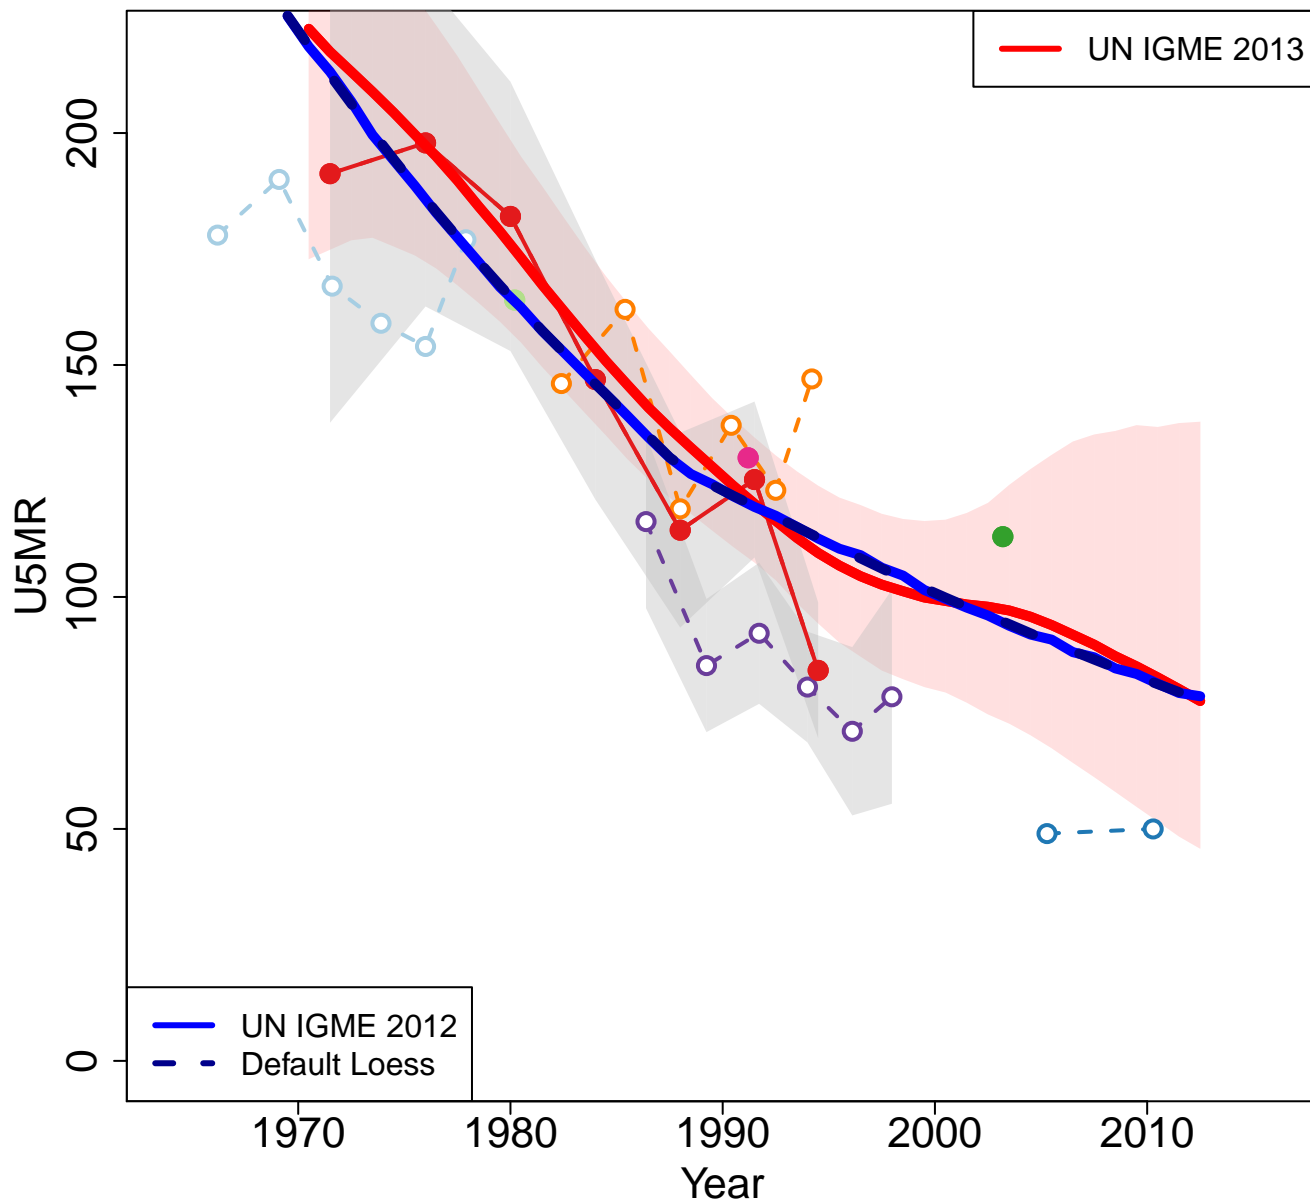

# Zoomed in

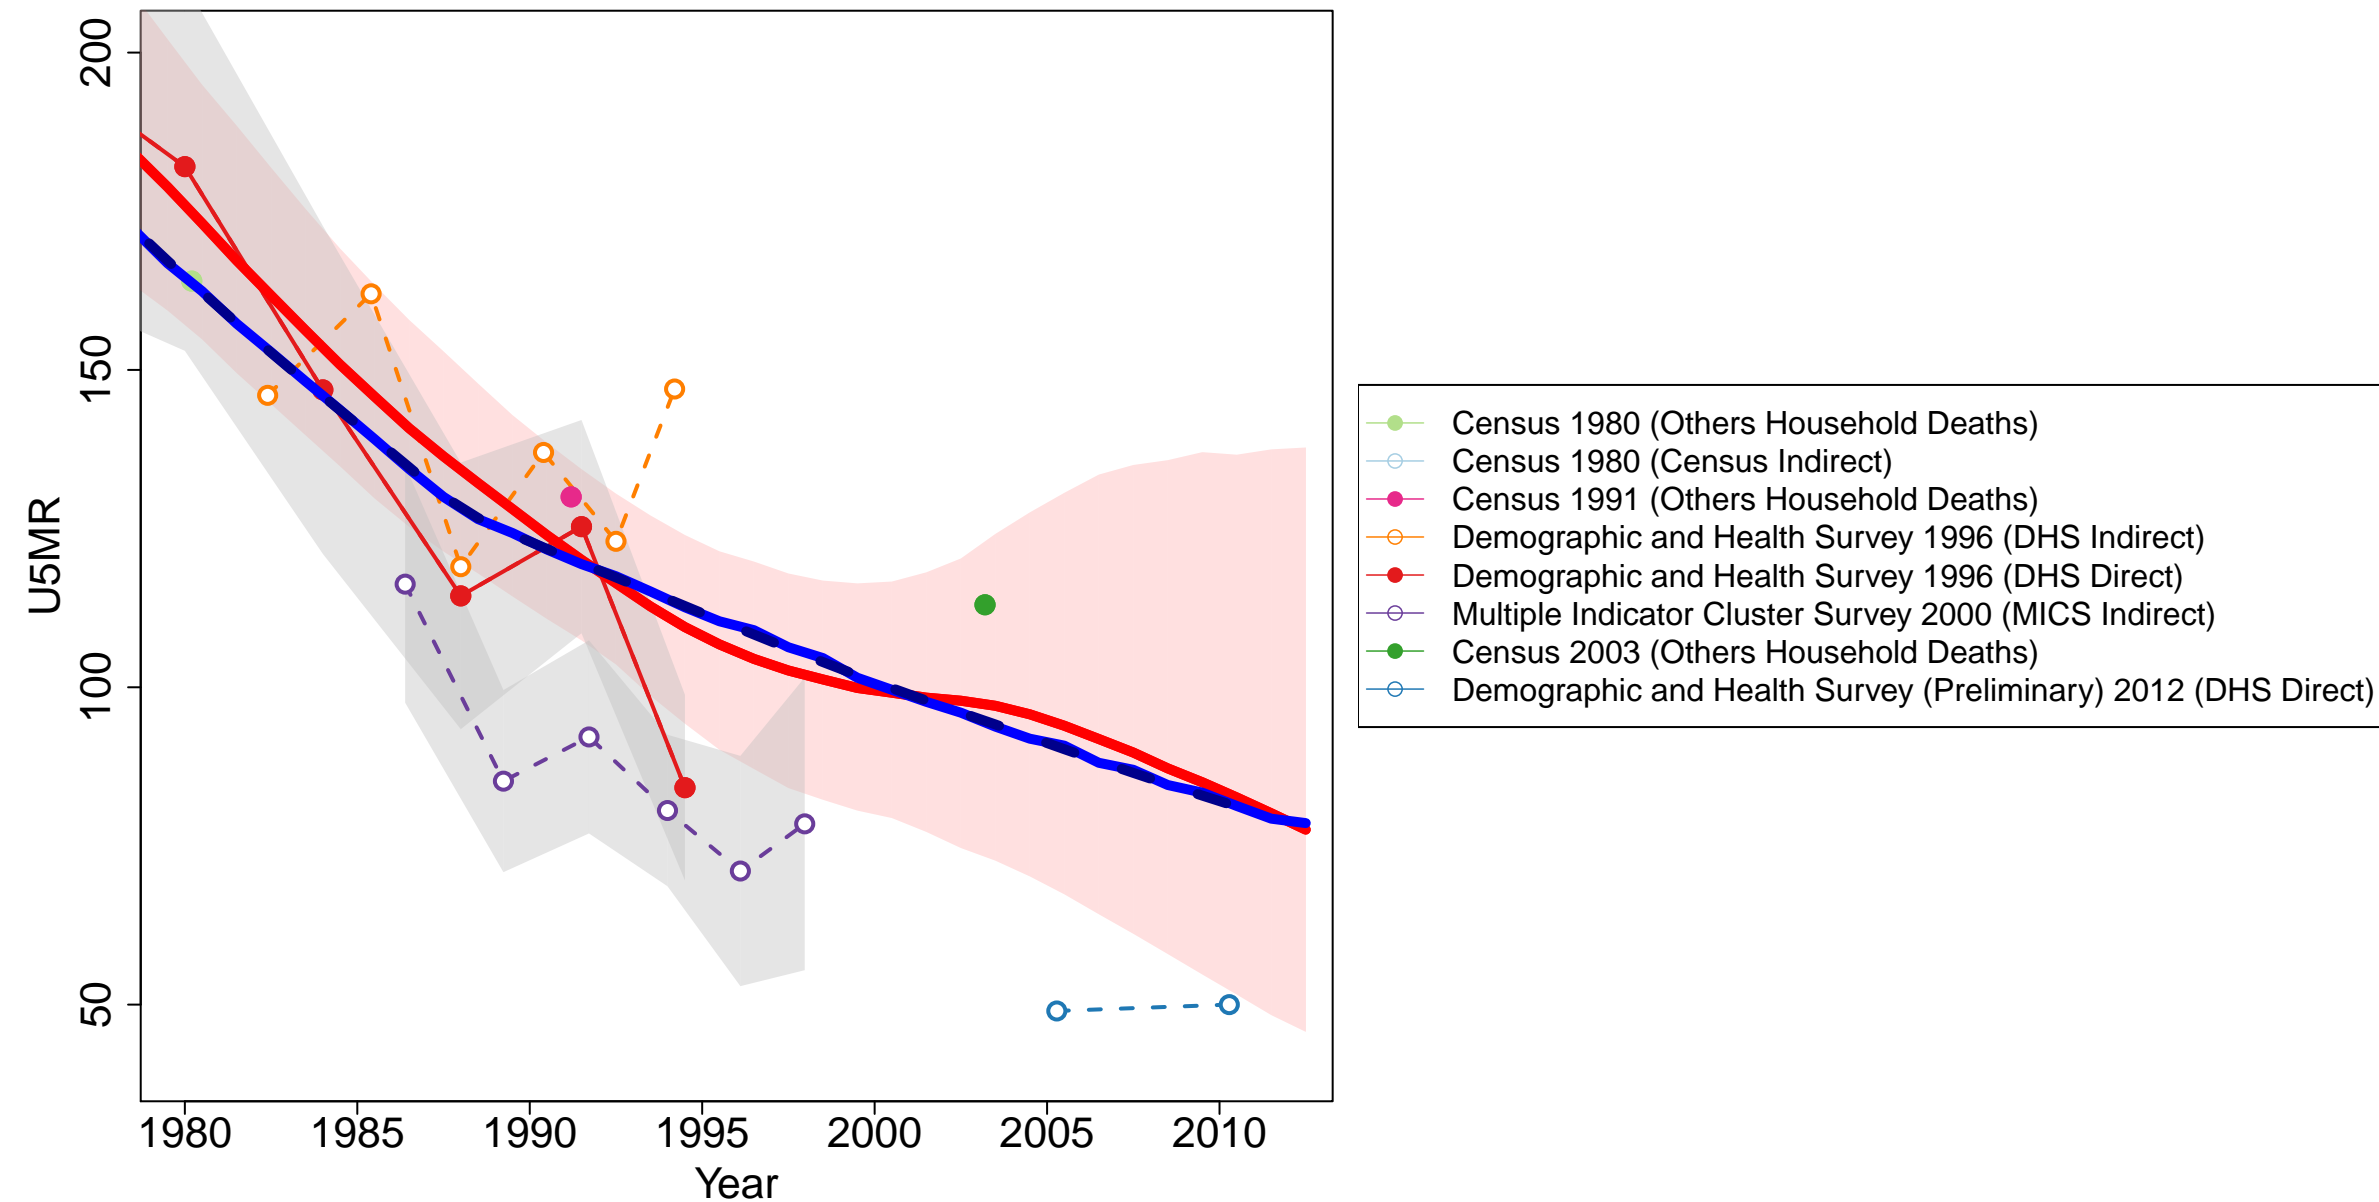

# Congo

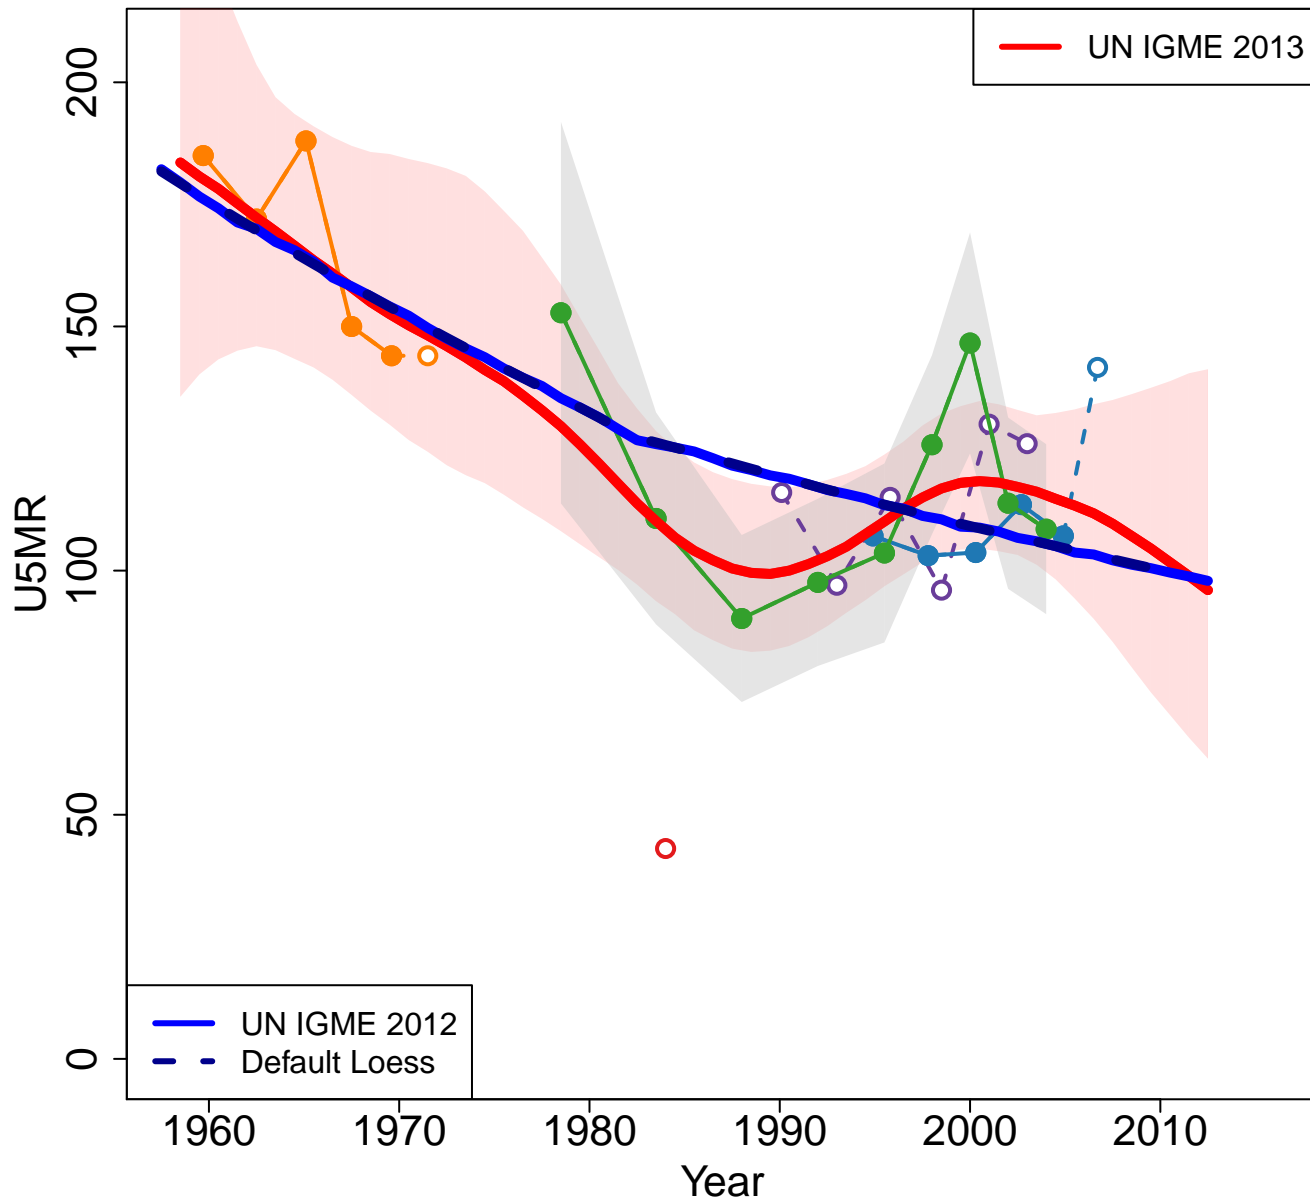

# Zoomed in

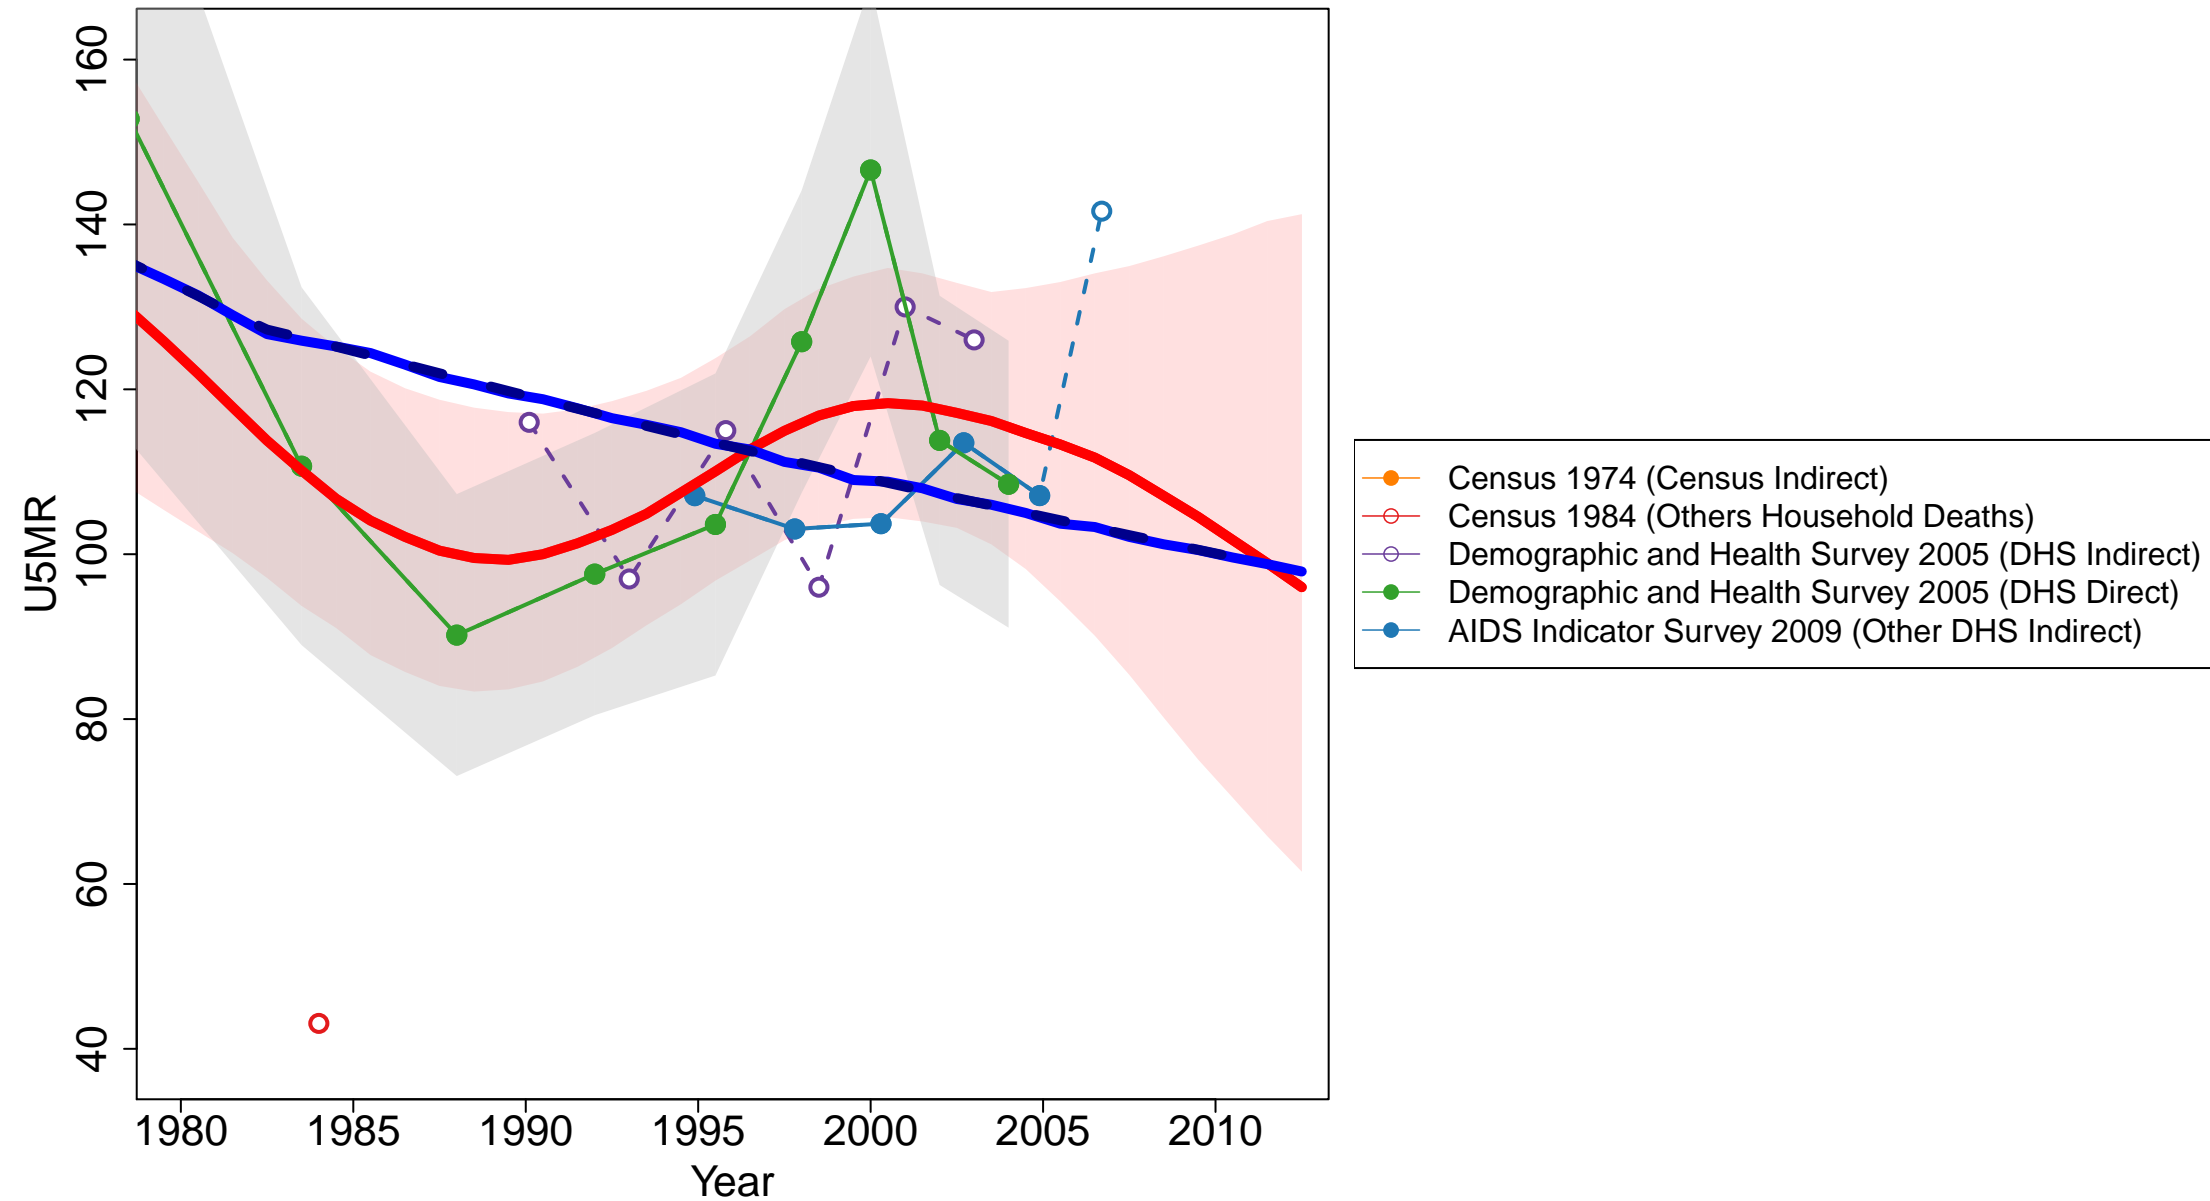

# Cook Islands

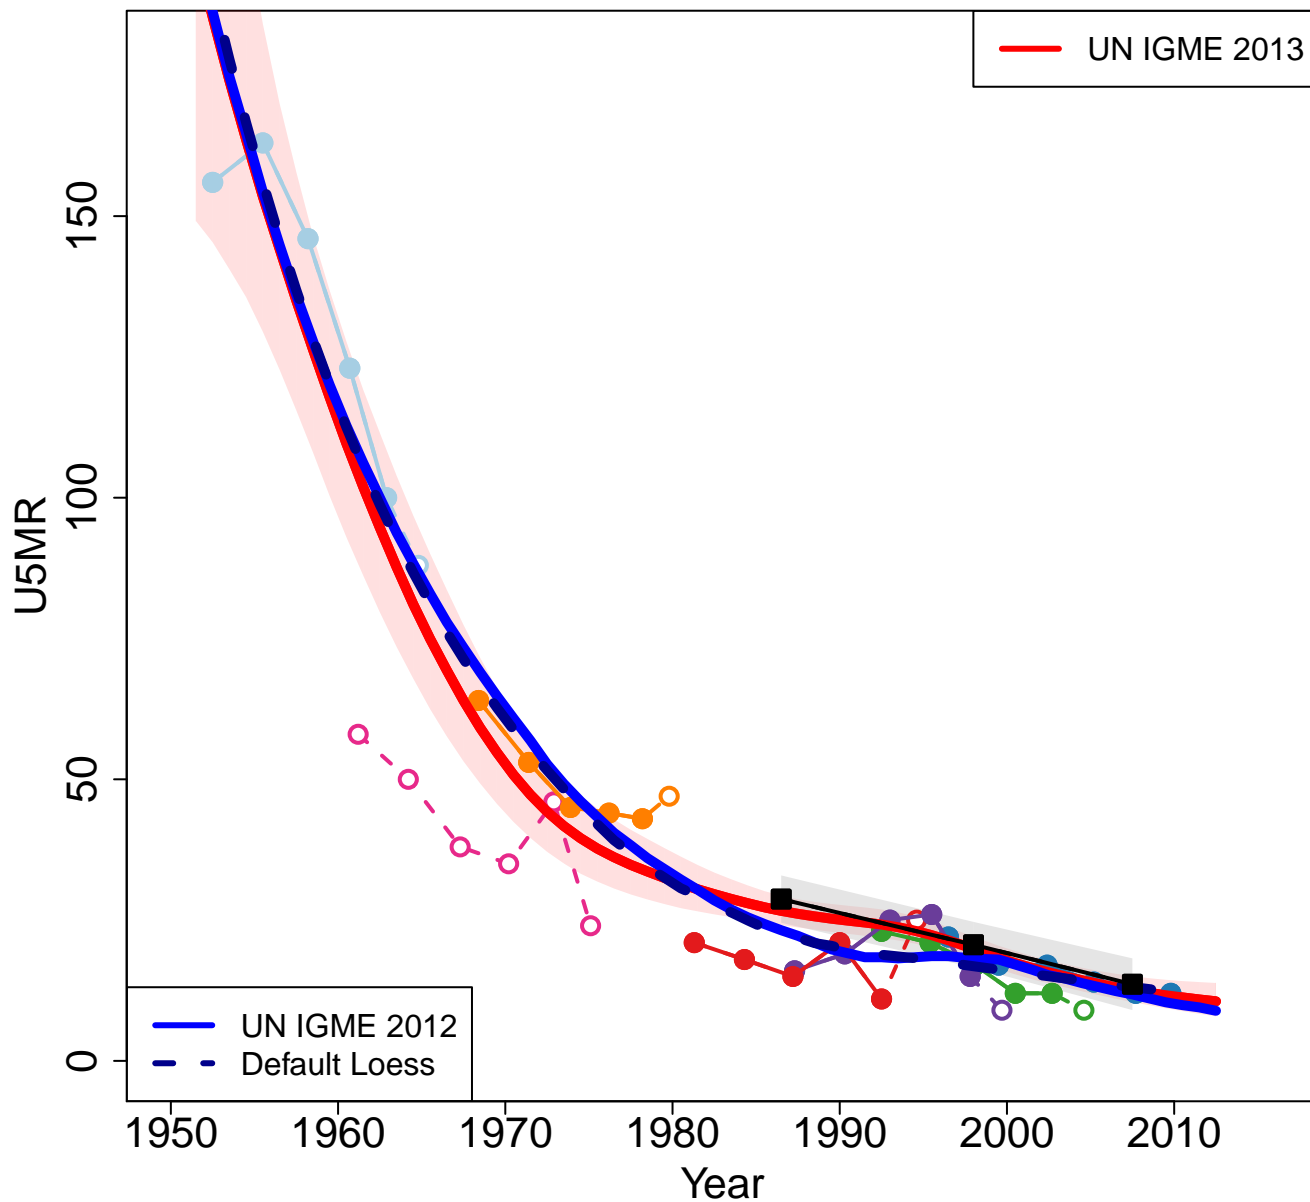

# Zoomed in

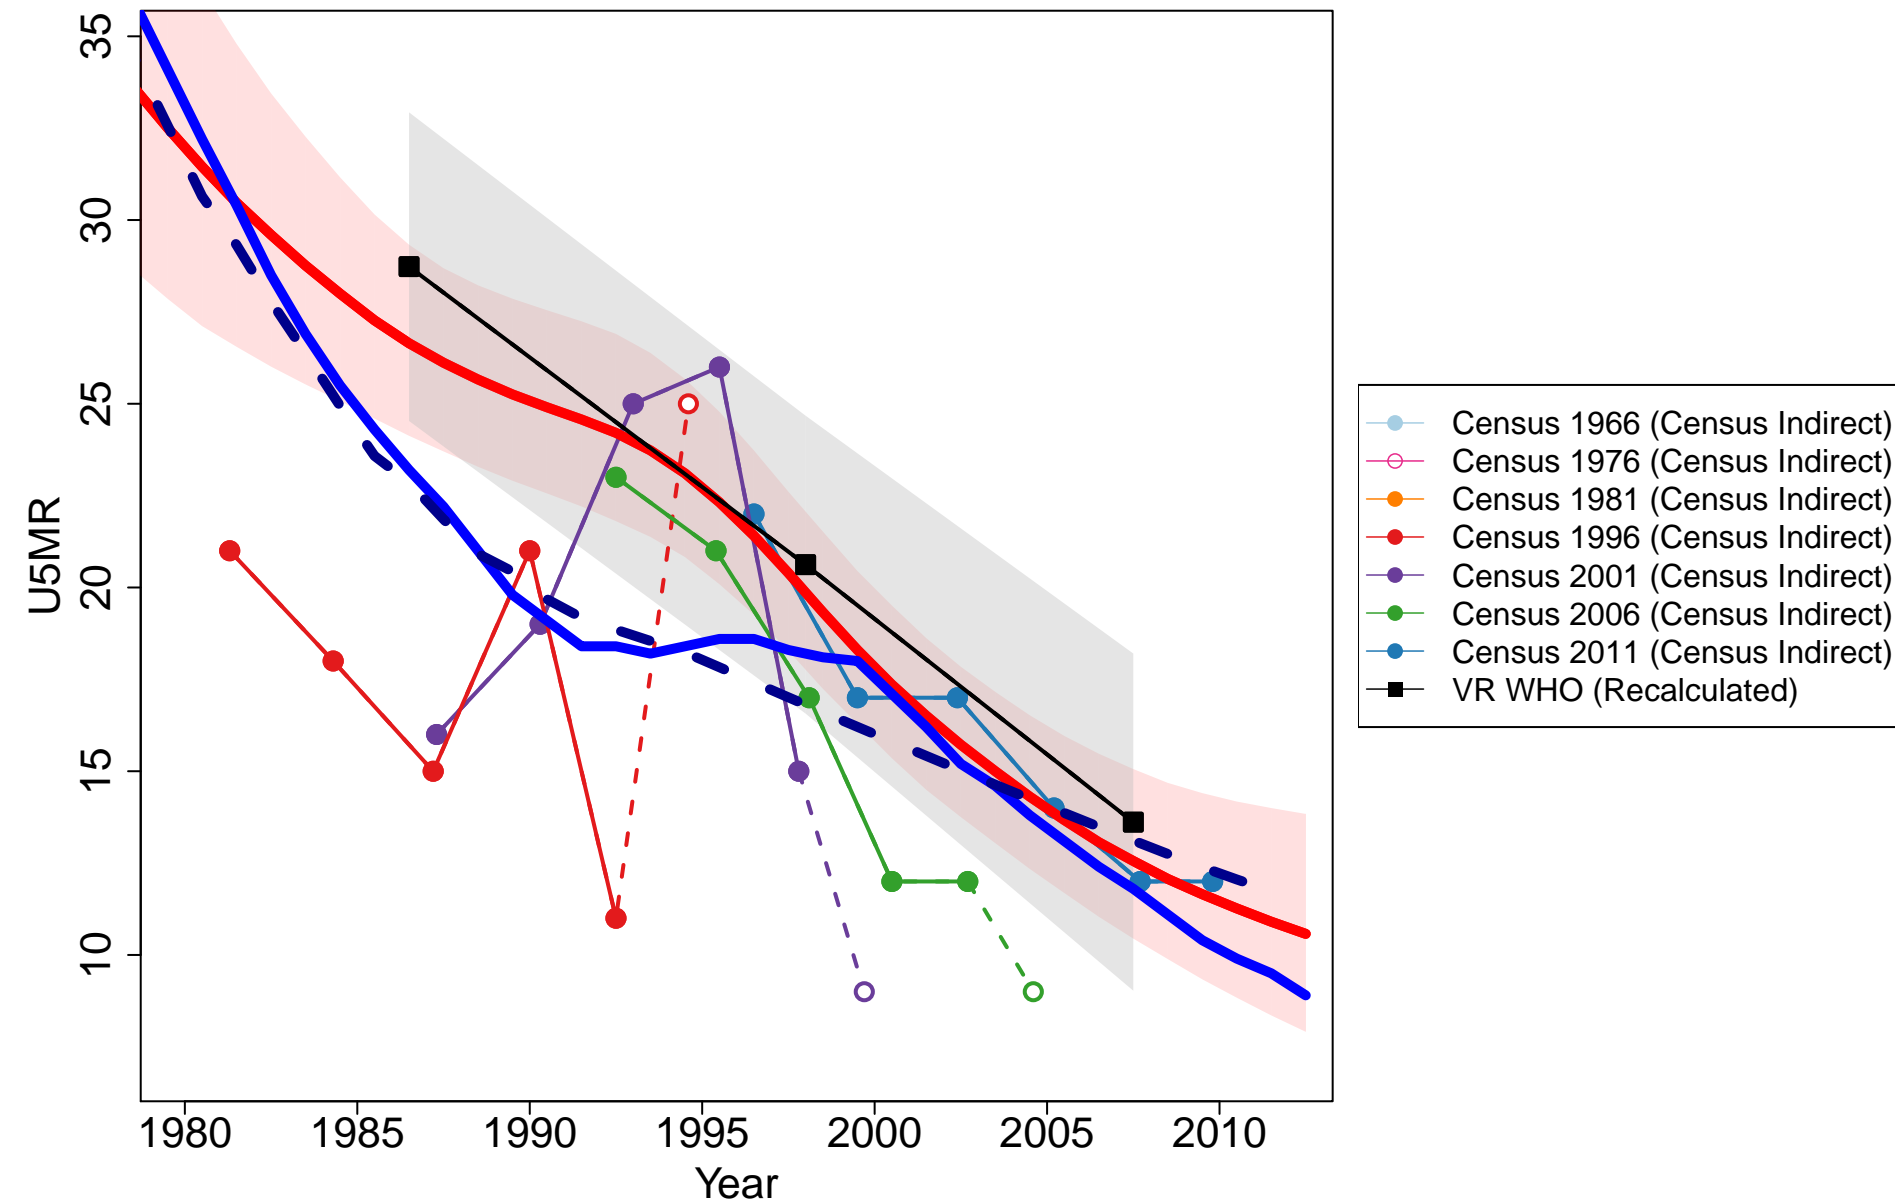

# Costa Rica

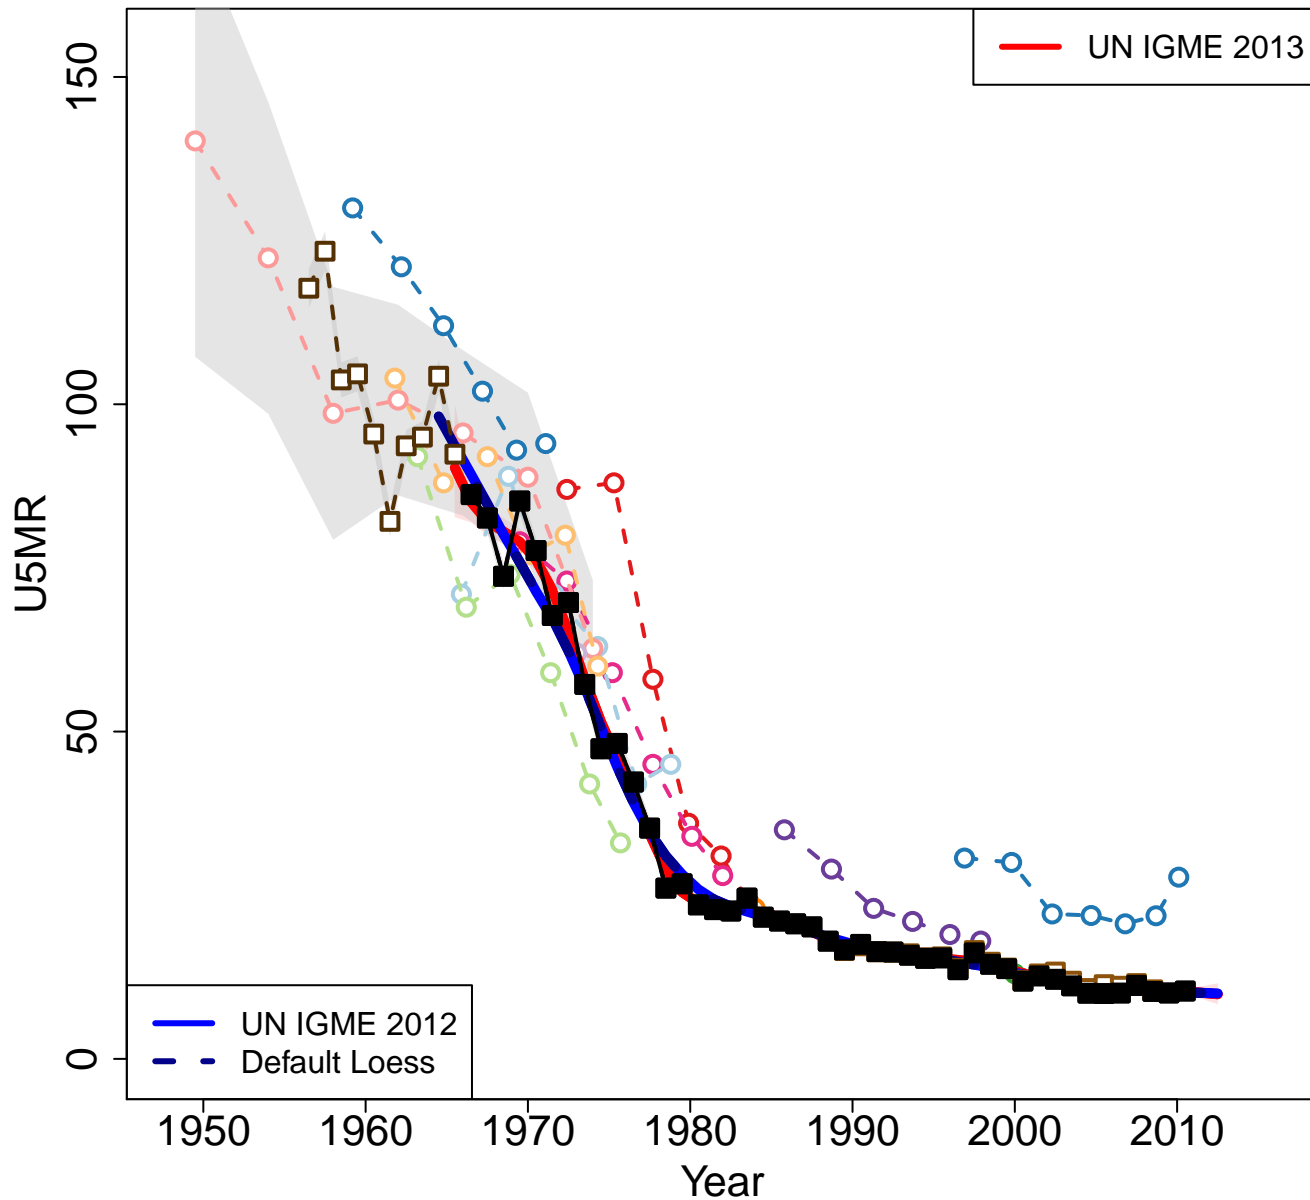

# Zoomed in

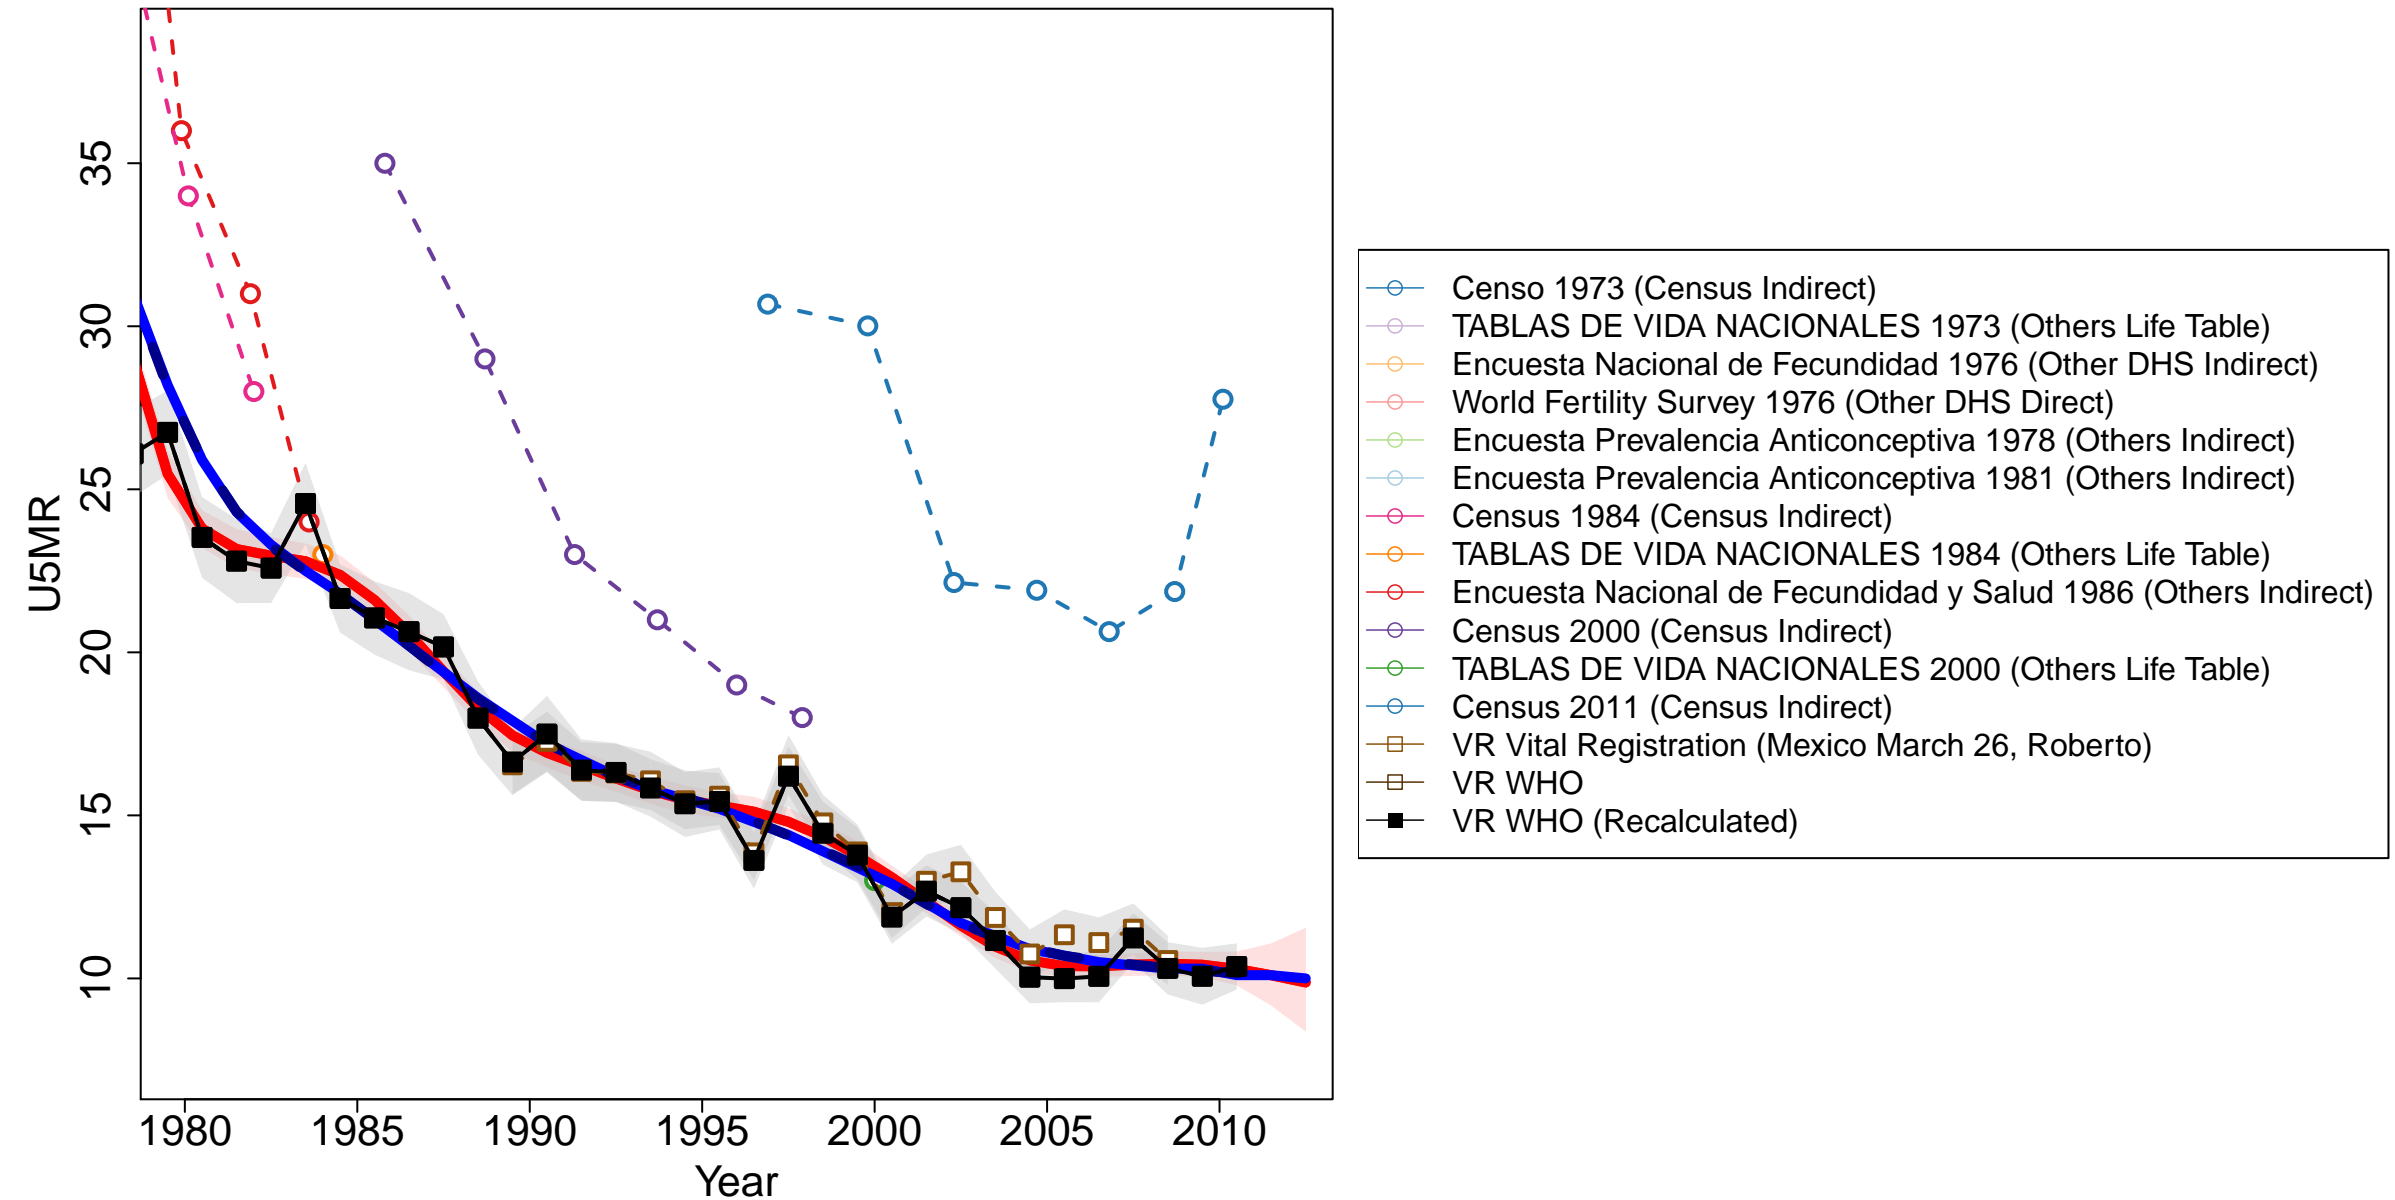



# Cuba

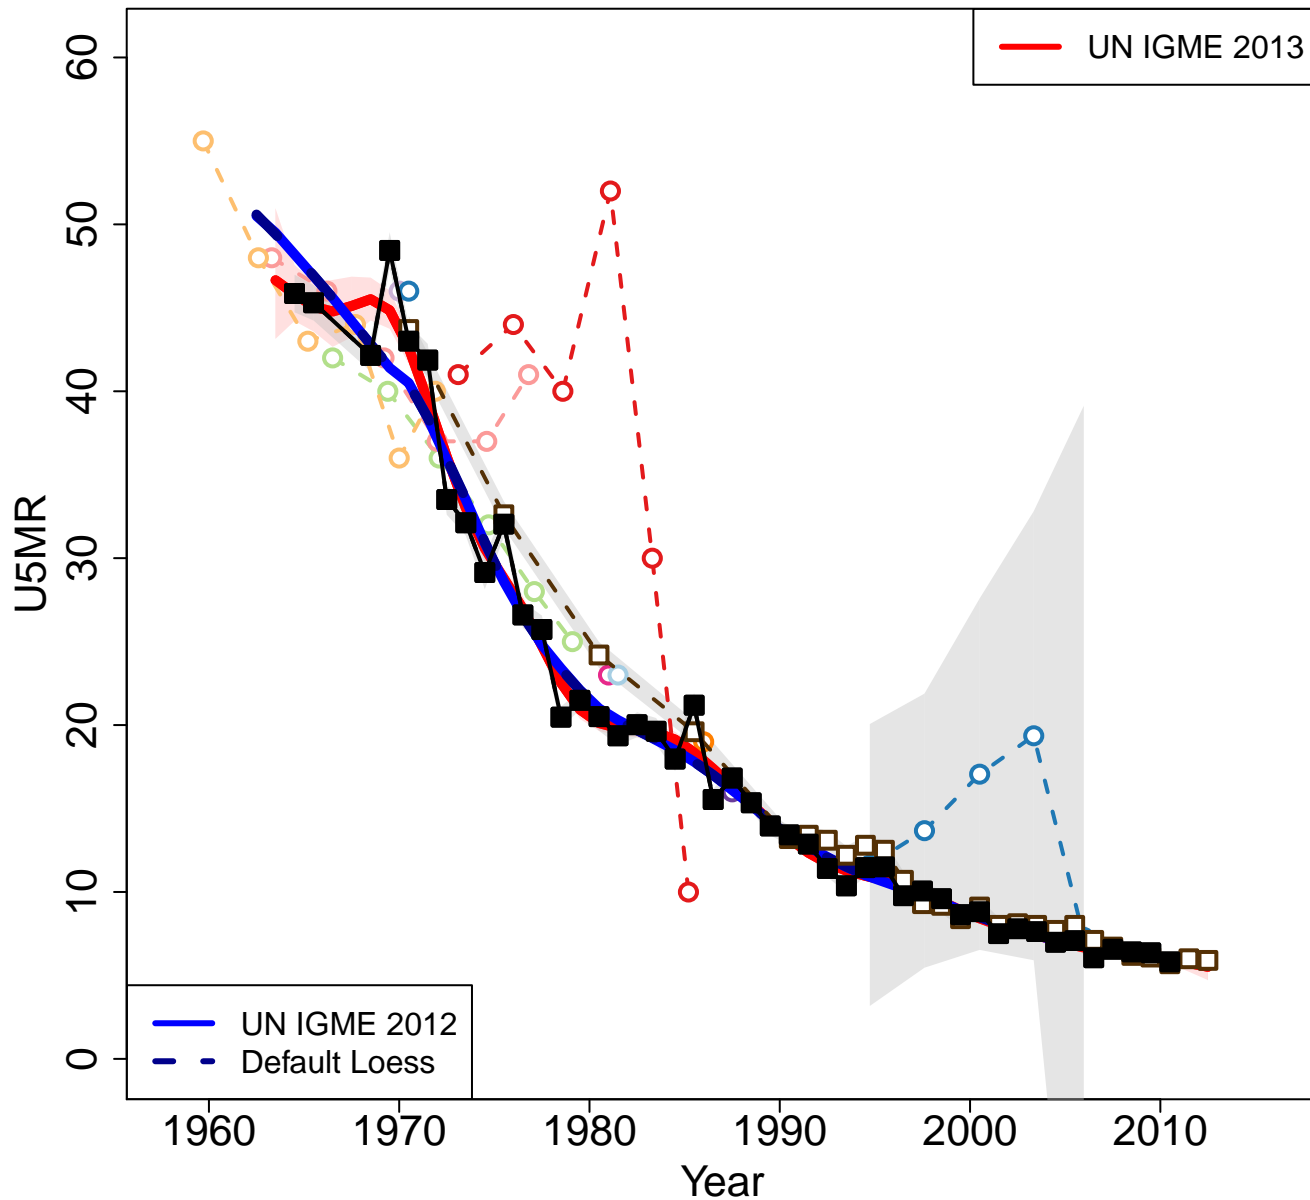

# Zoomed in

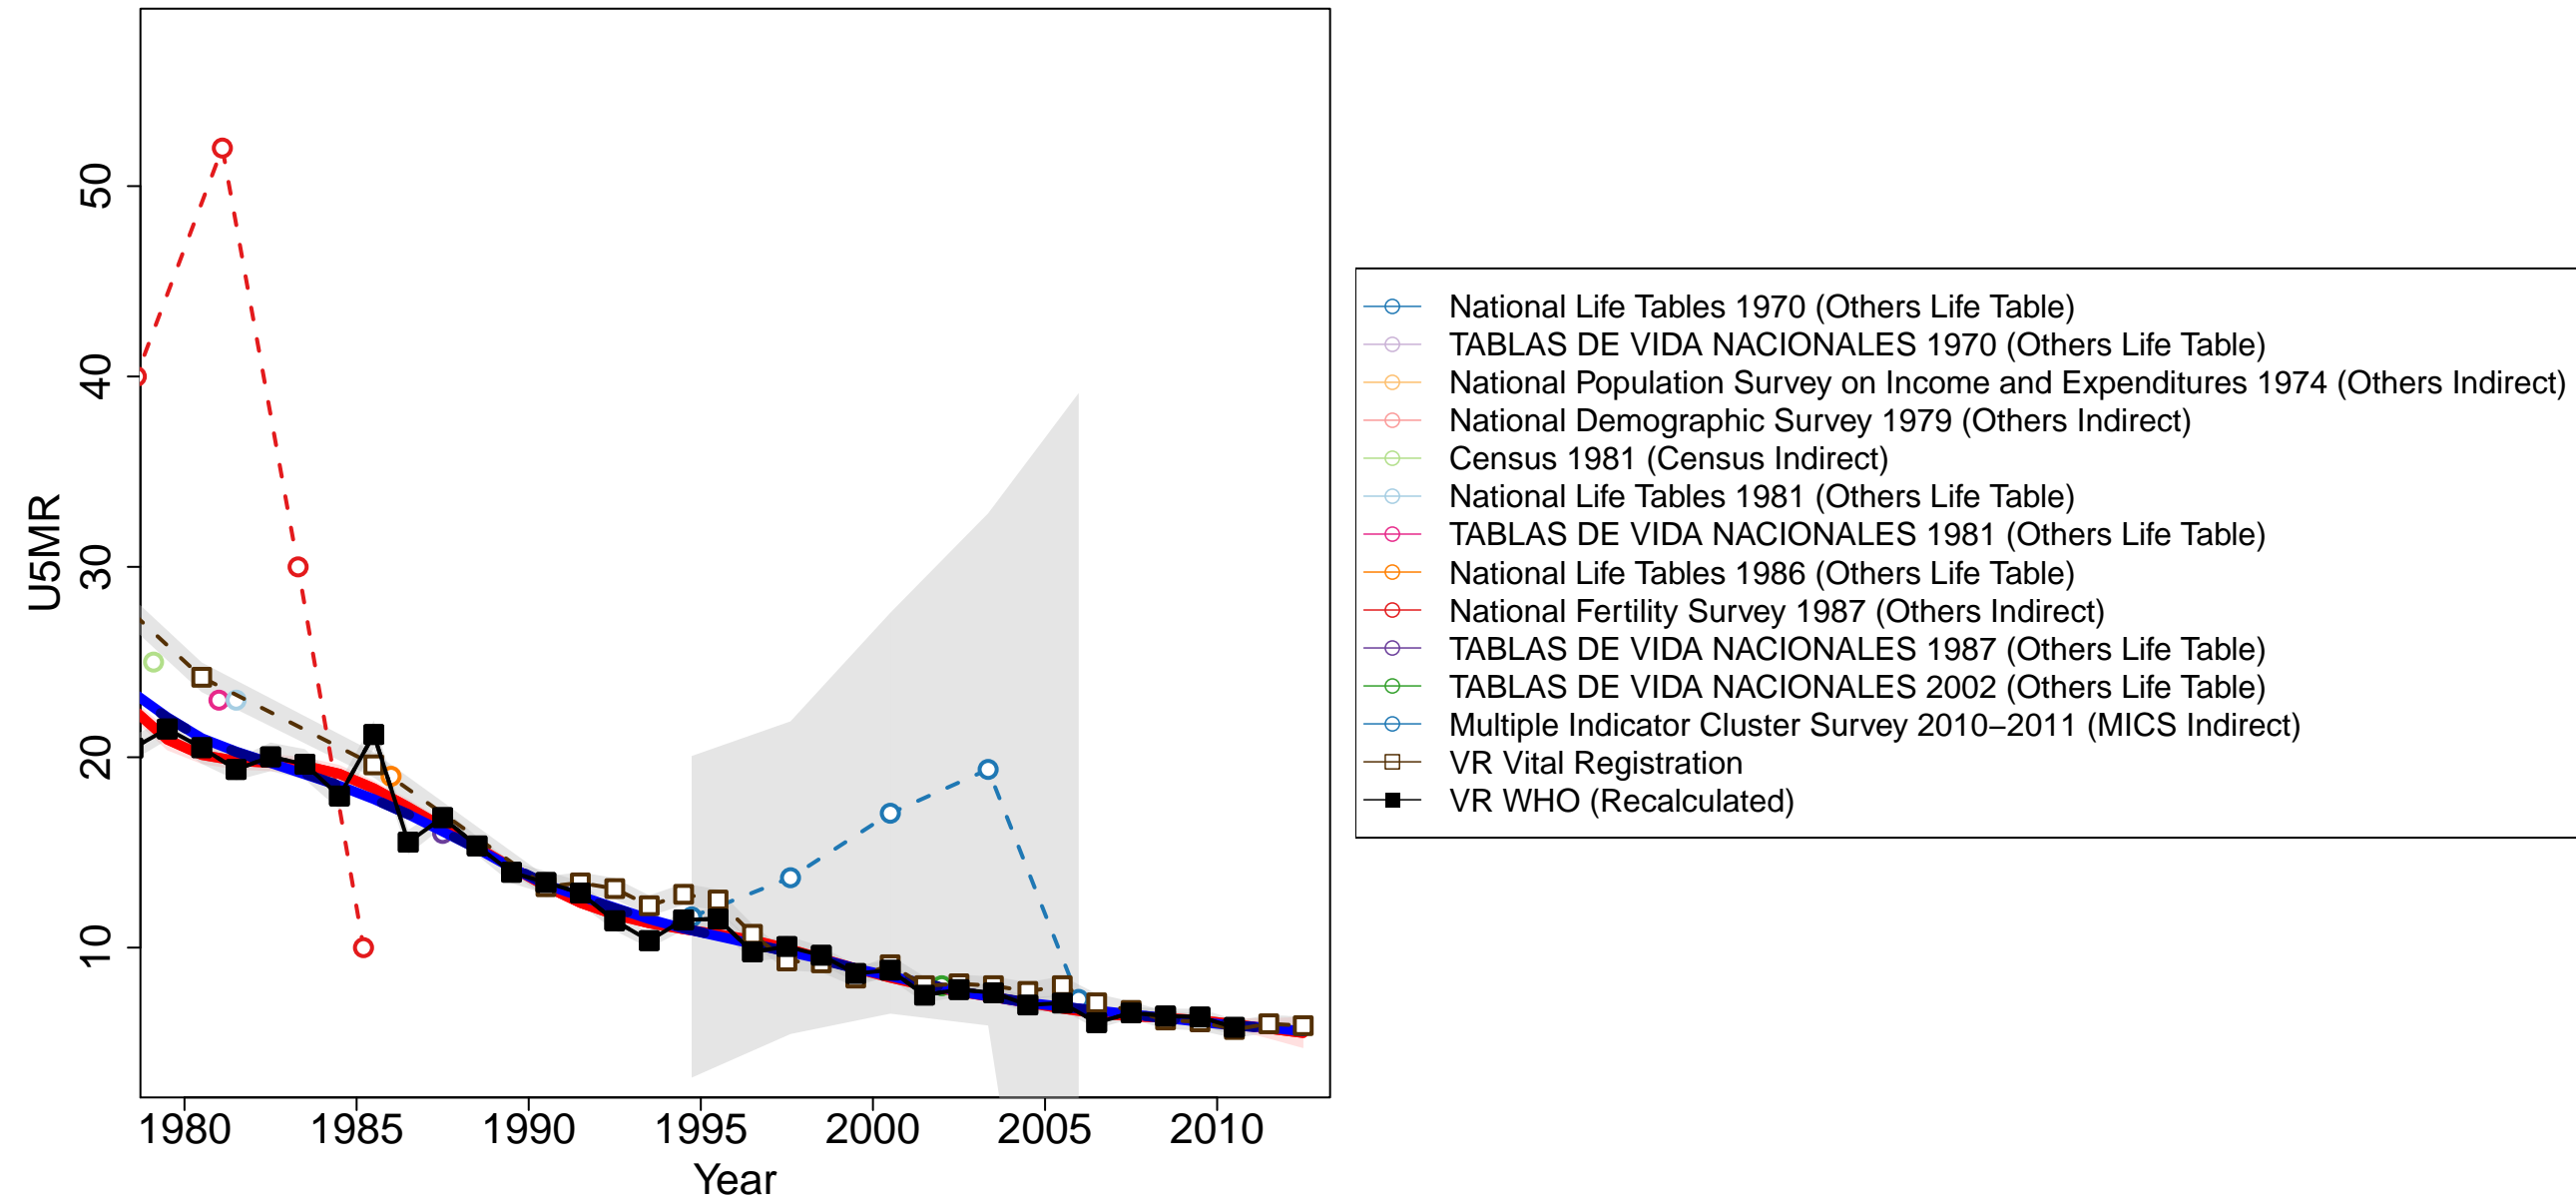

# Djibouti

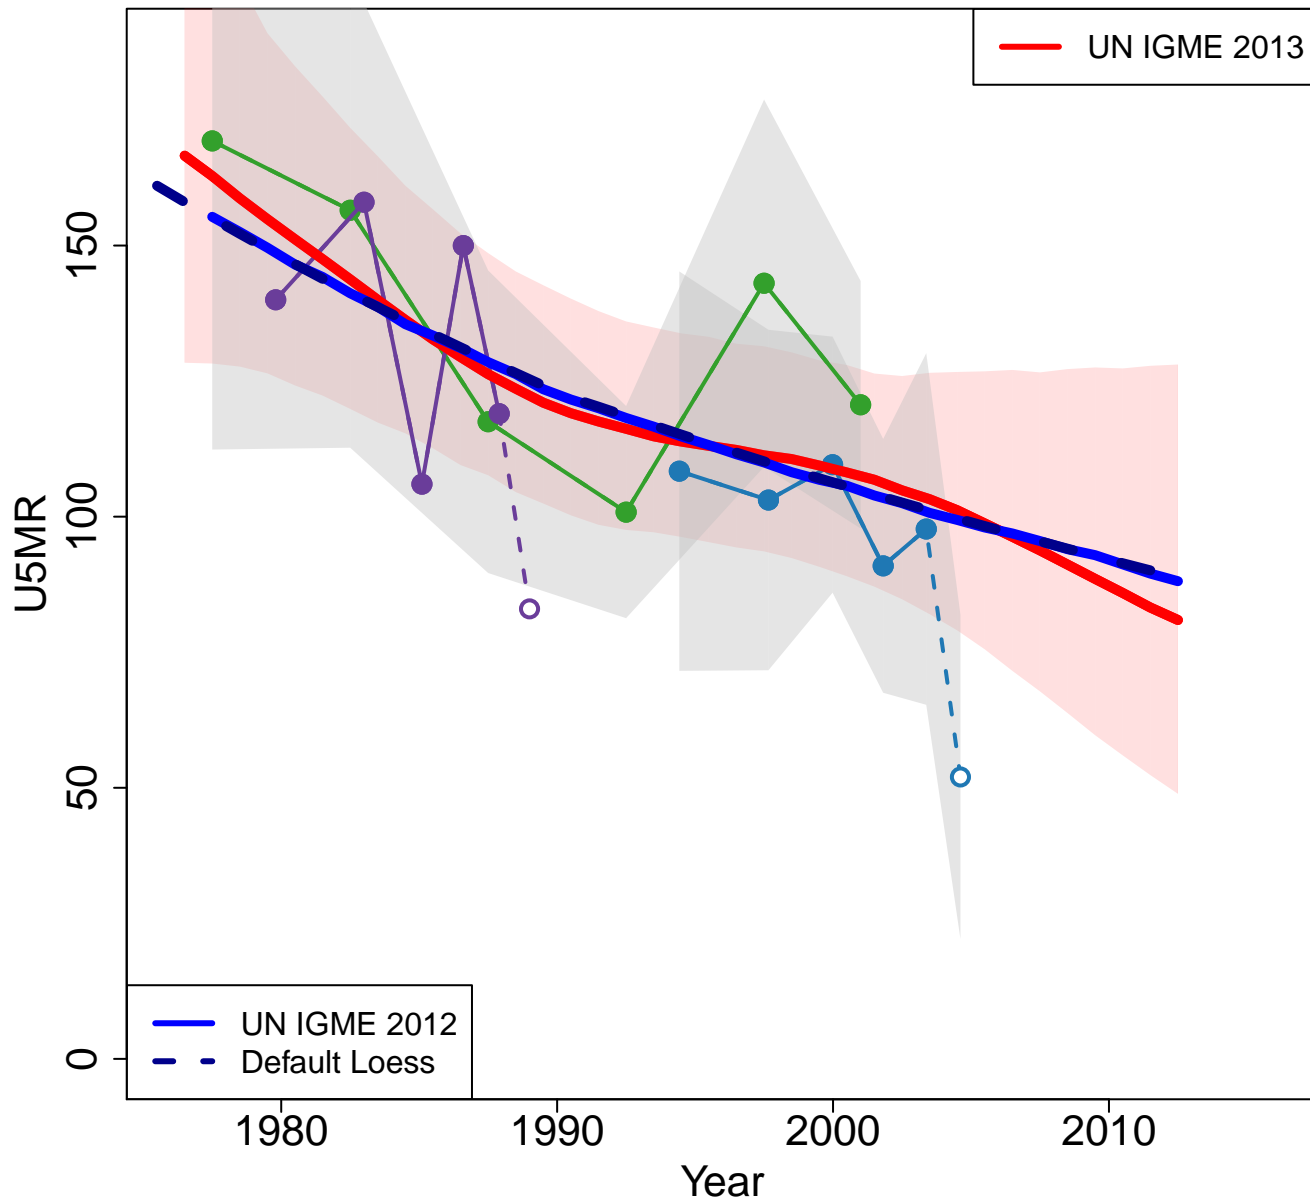

# Zoomed in

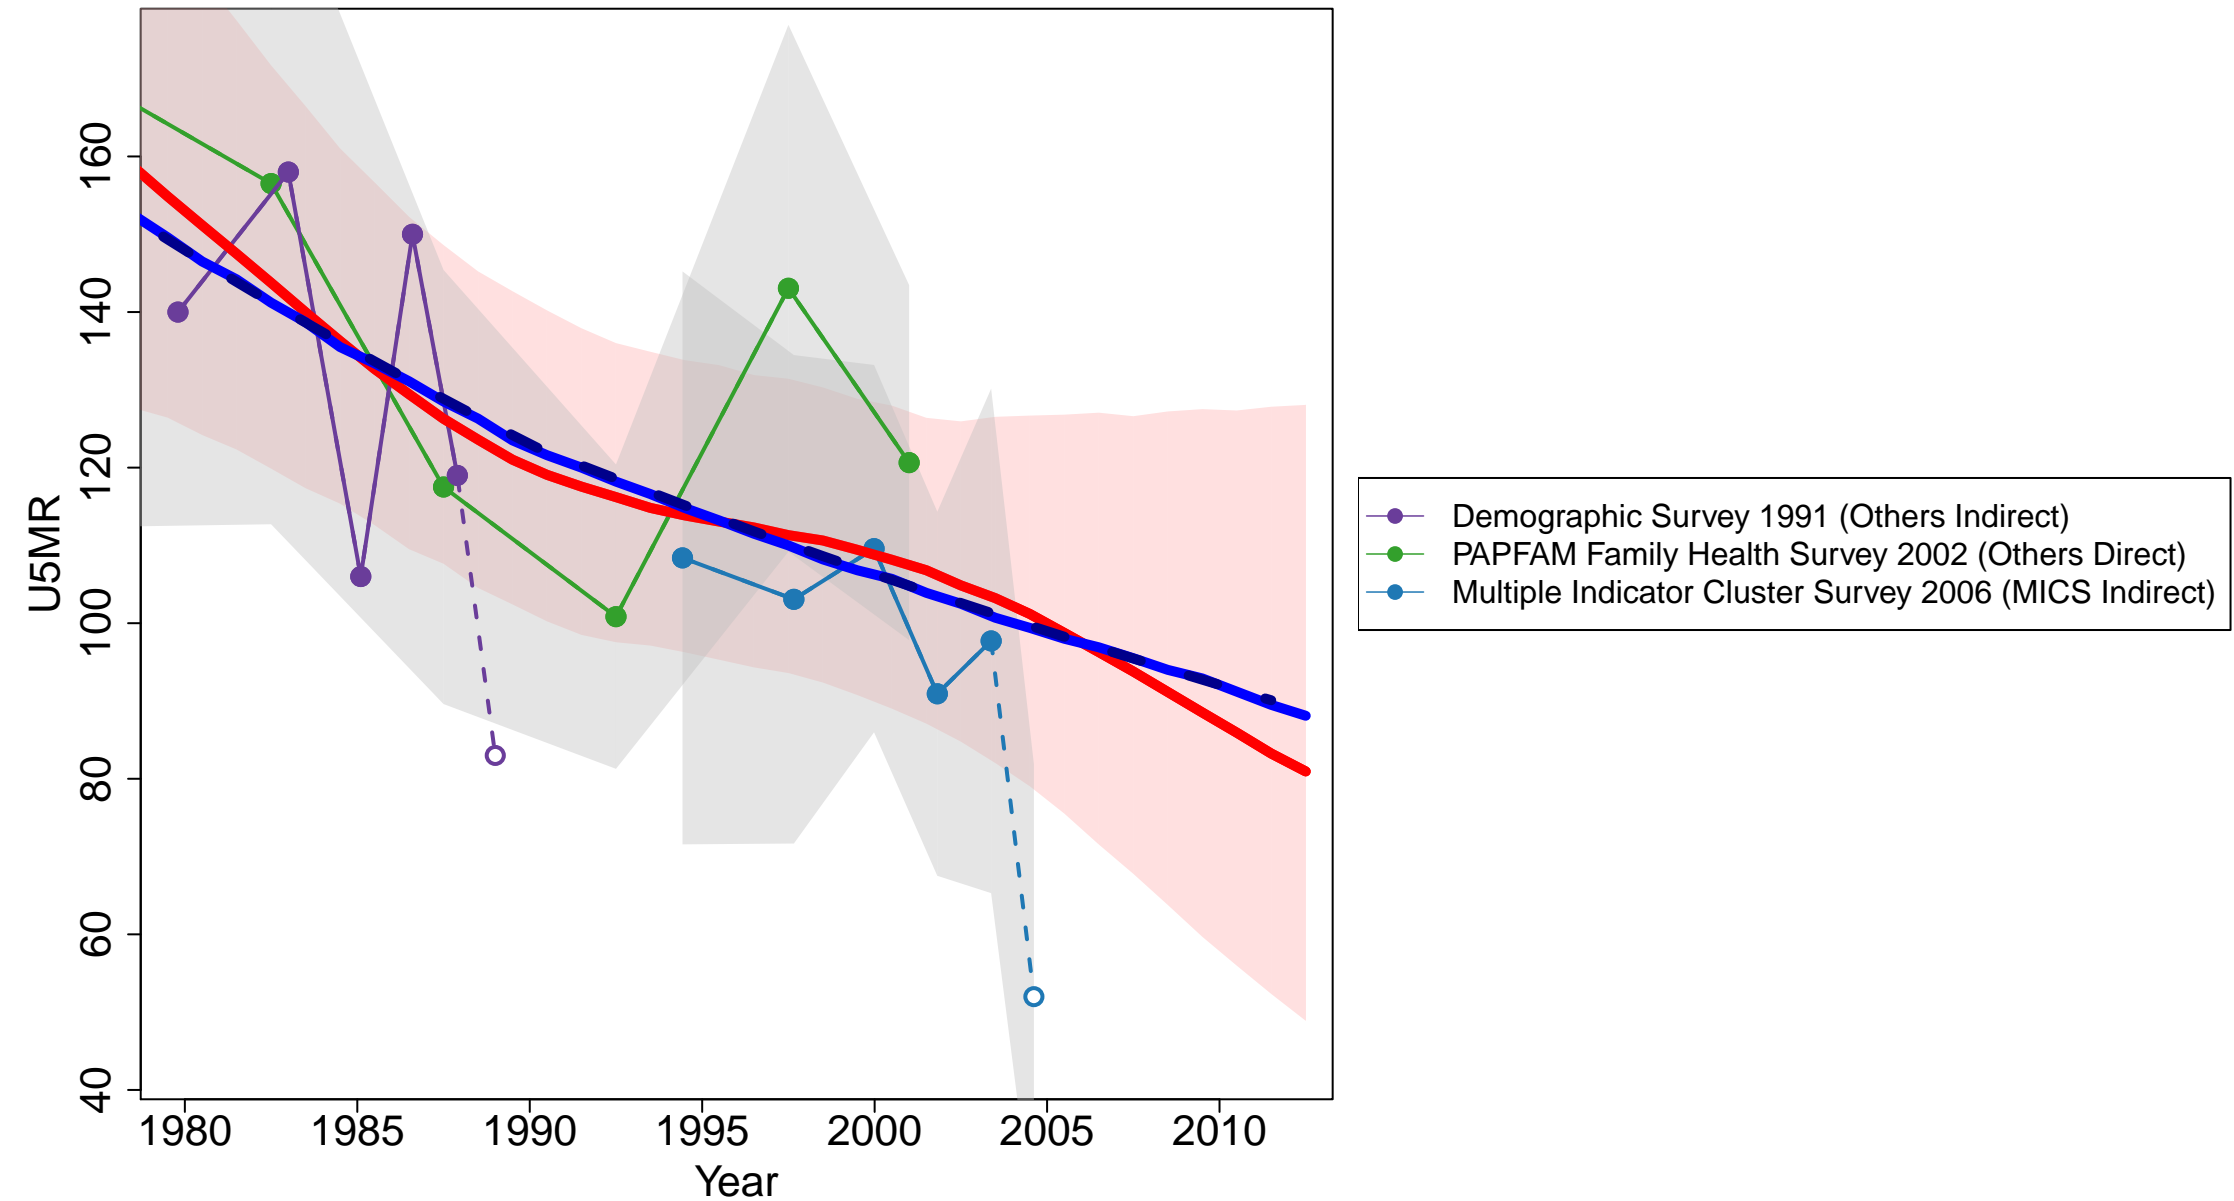

# Dominican Republic

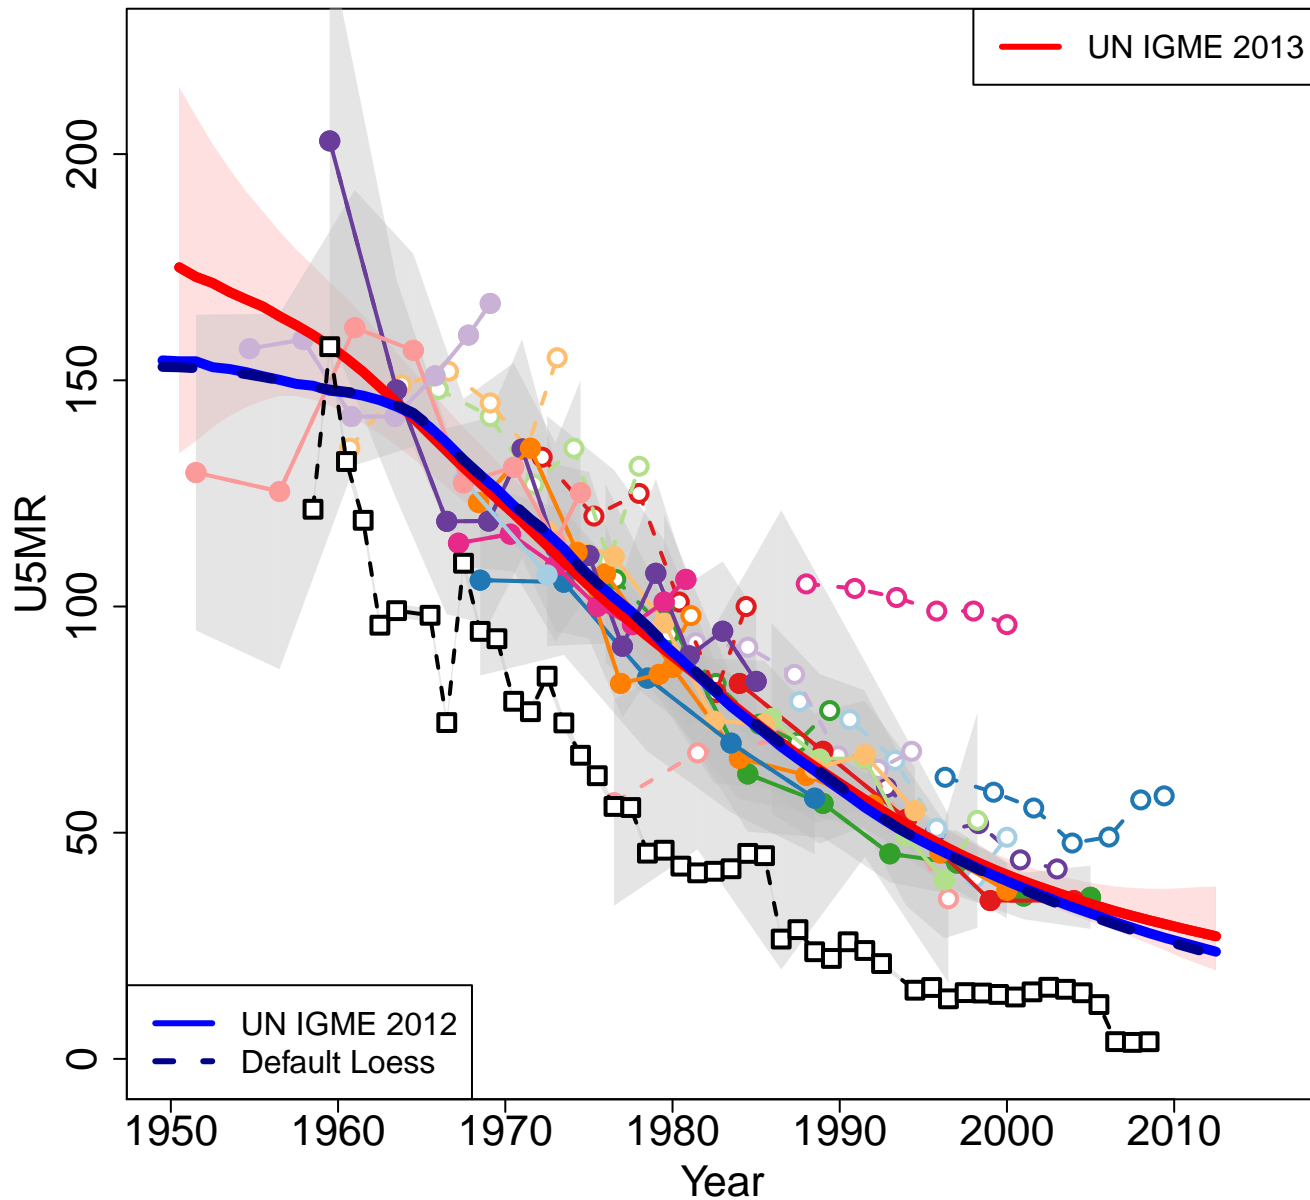

# Zoomed in

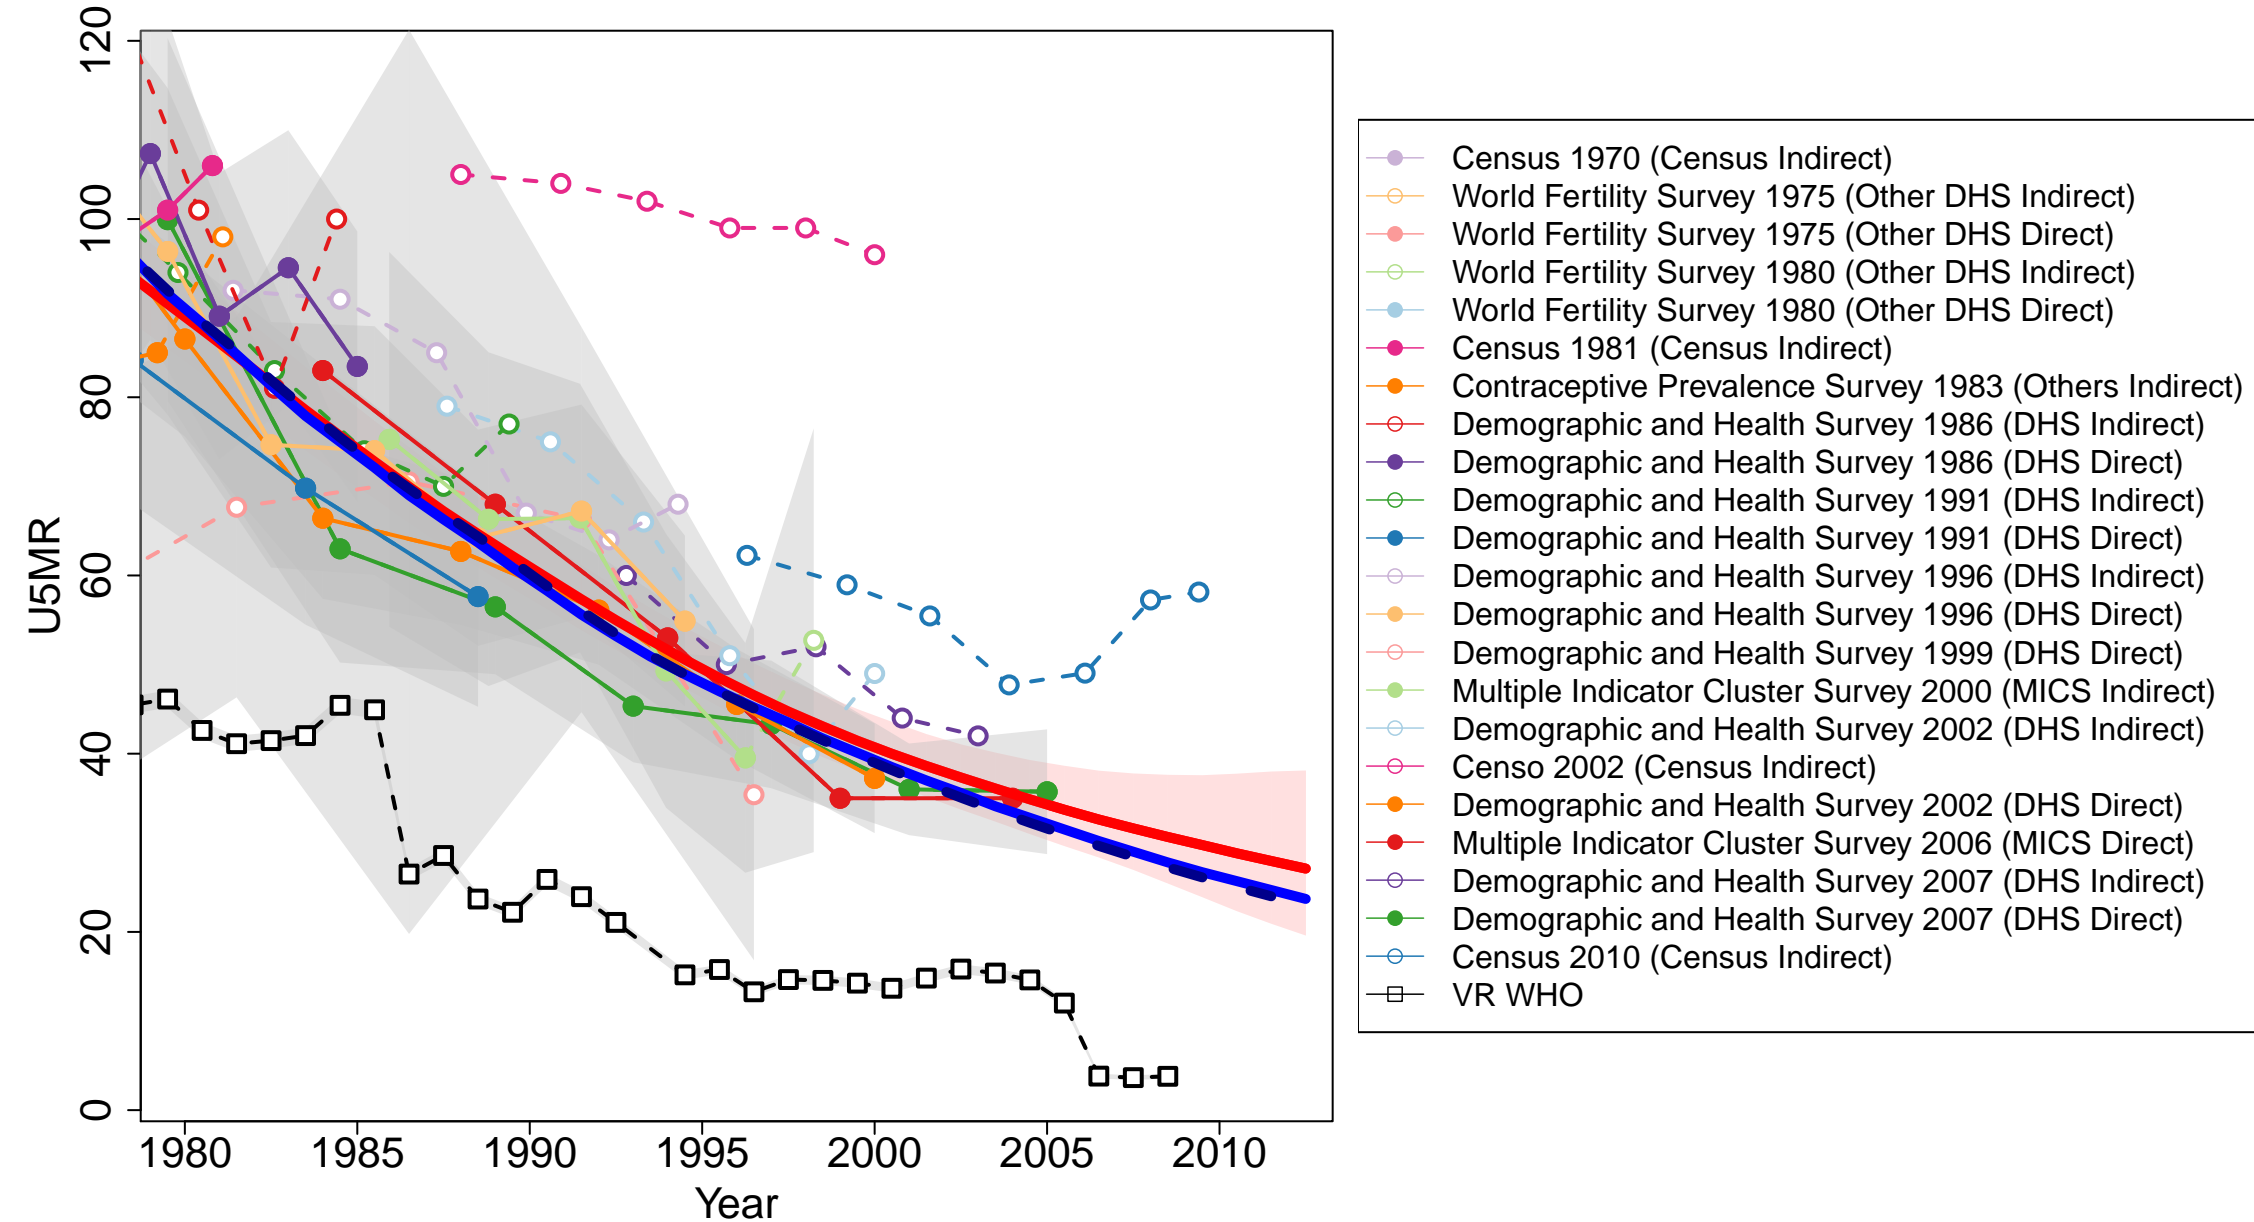

# Ecuador

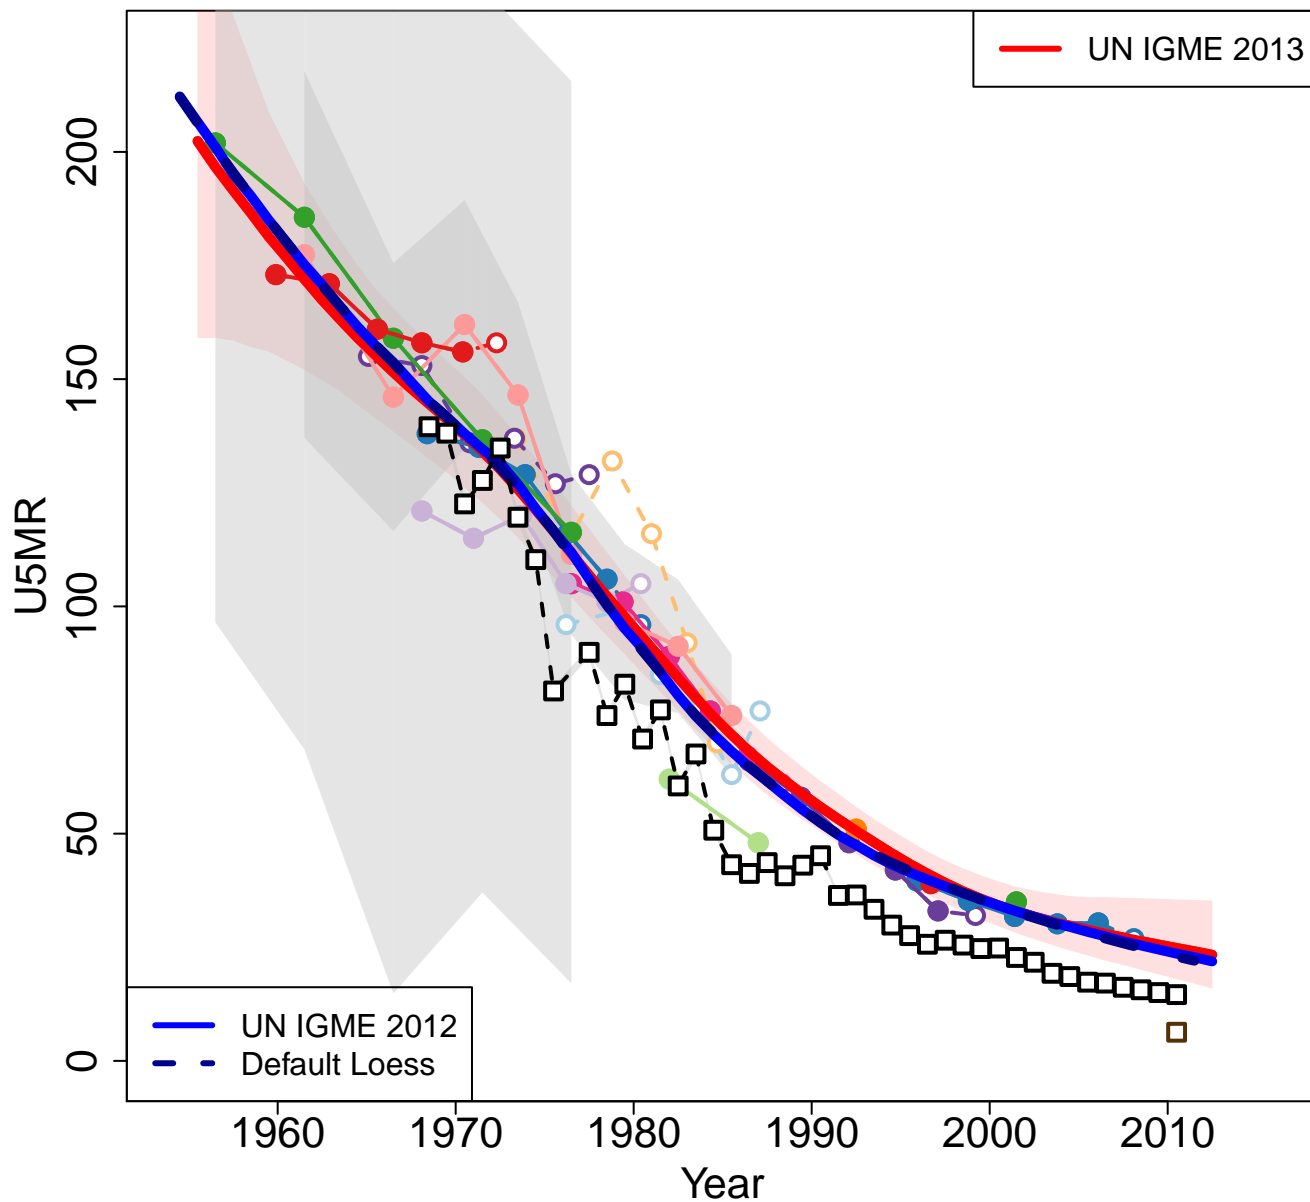

# Zoomed in

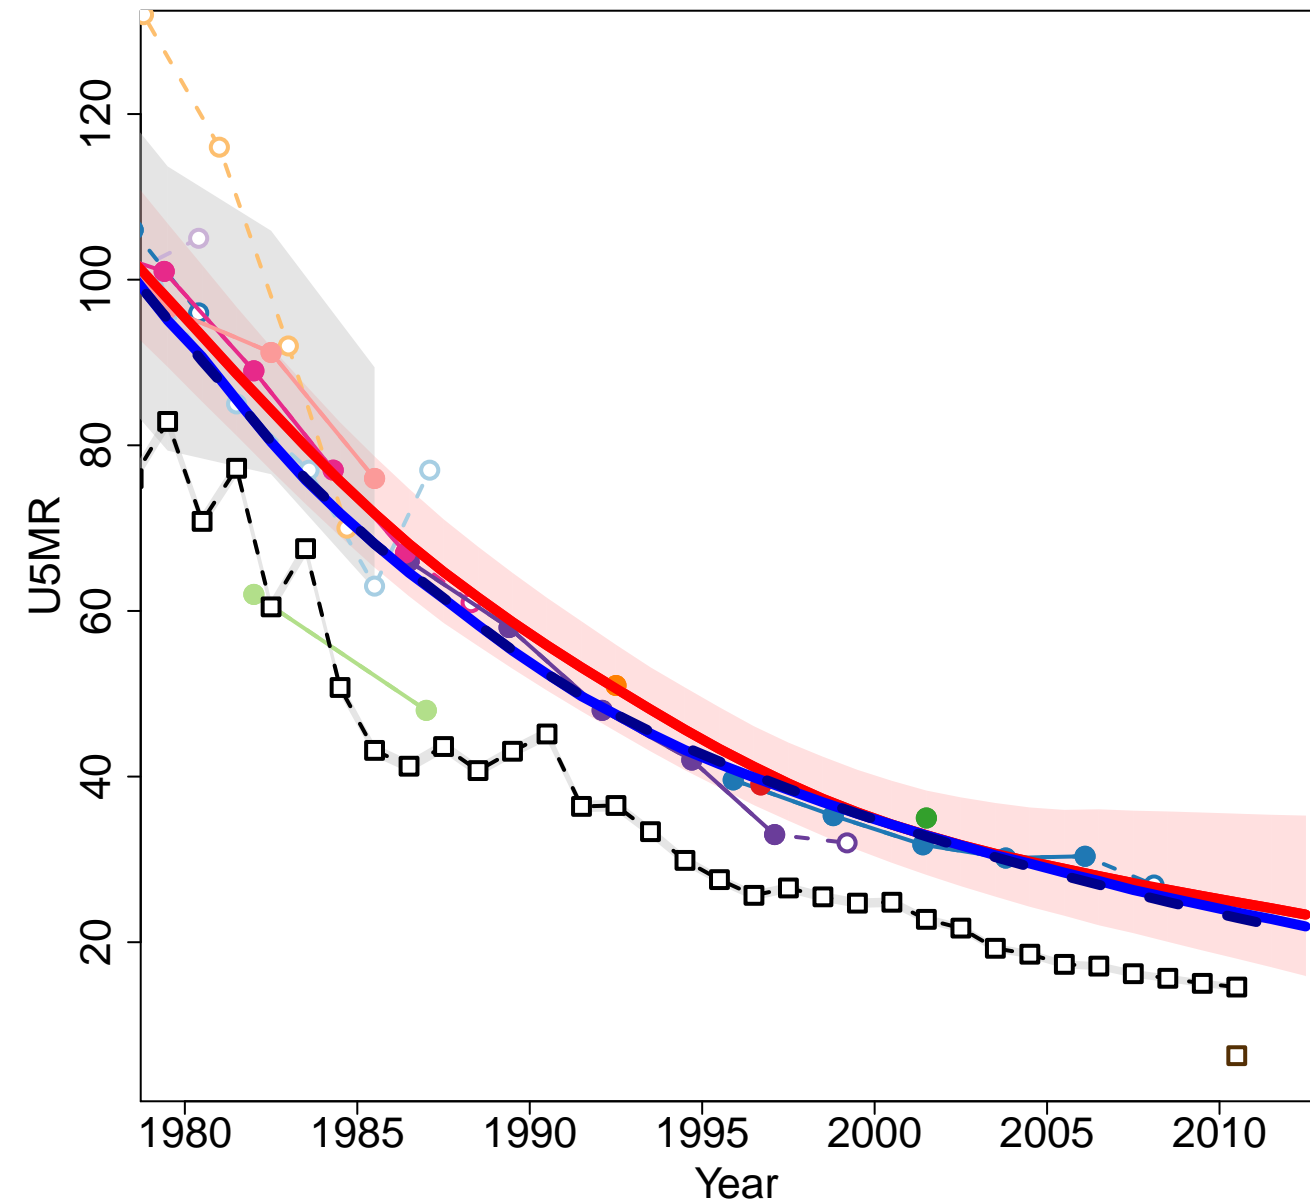

# Egypt

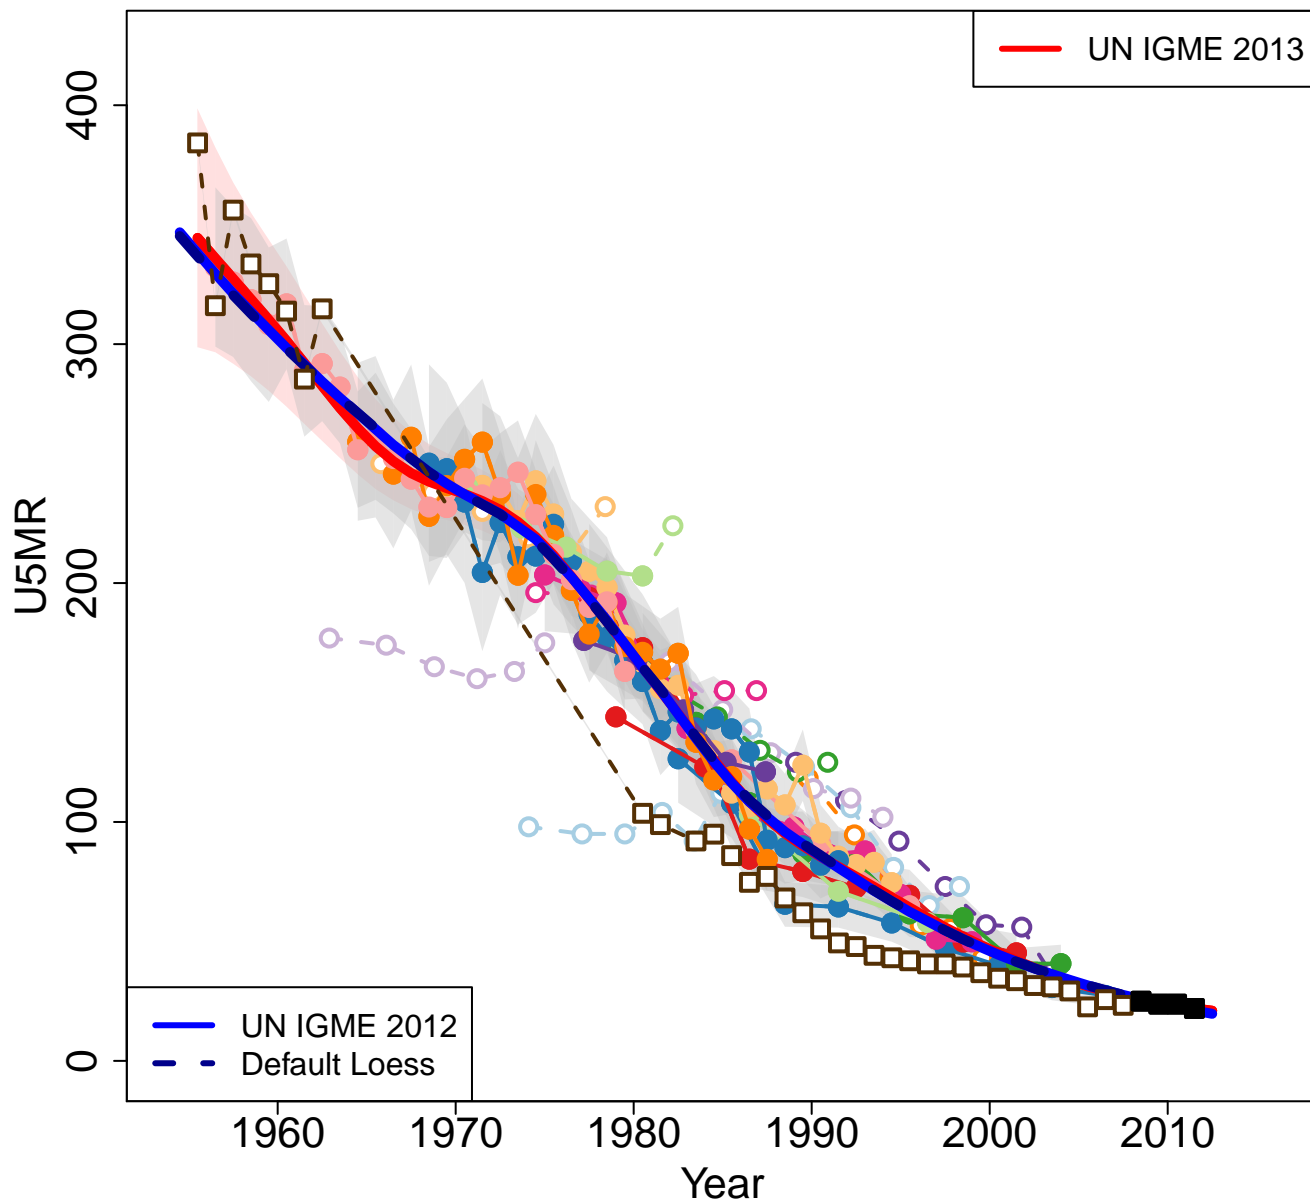

# Zoomed in

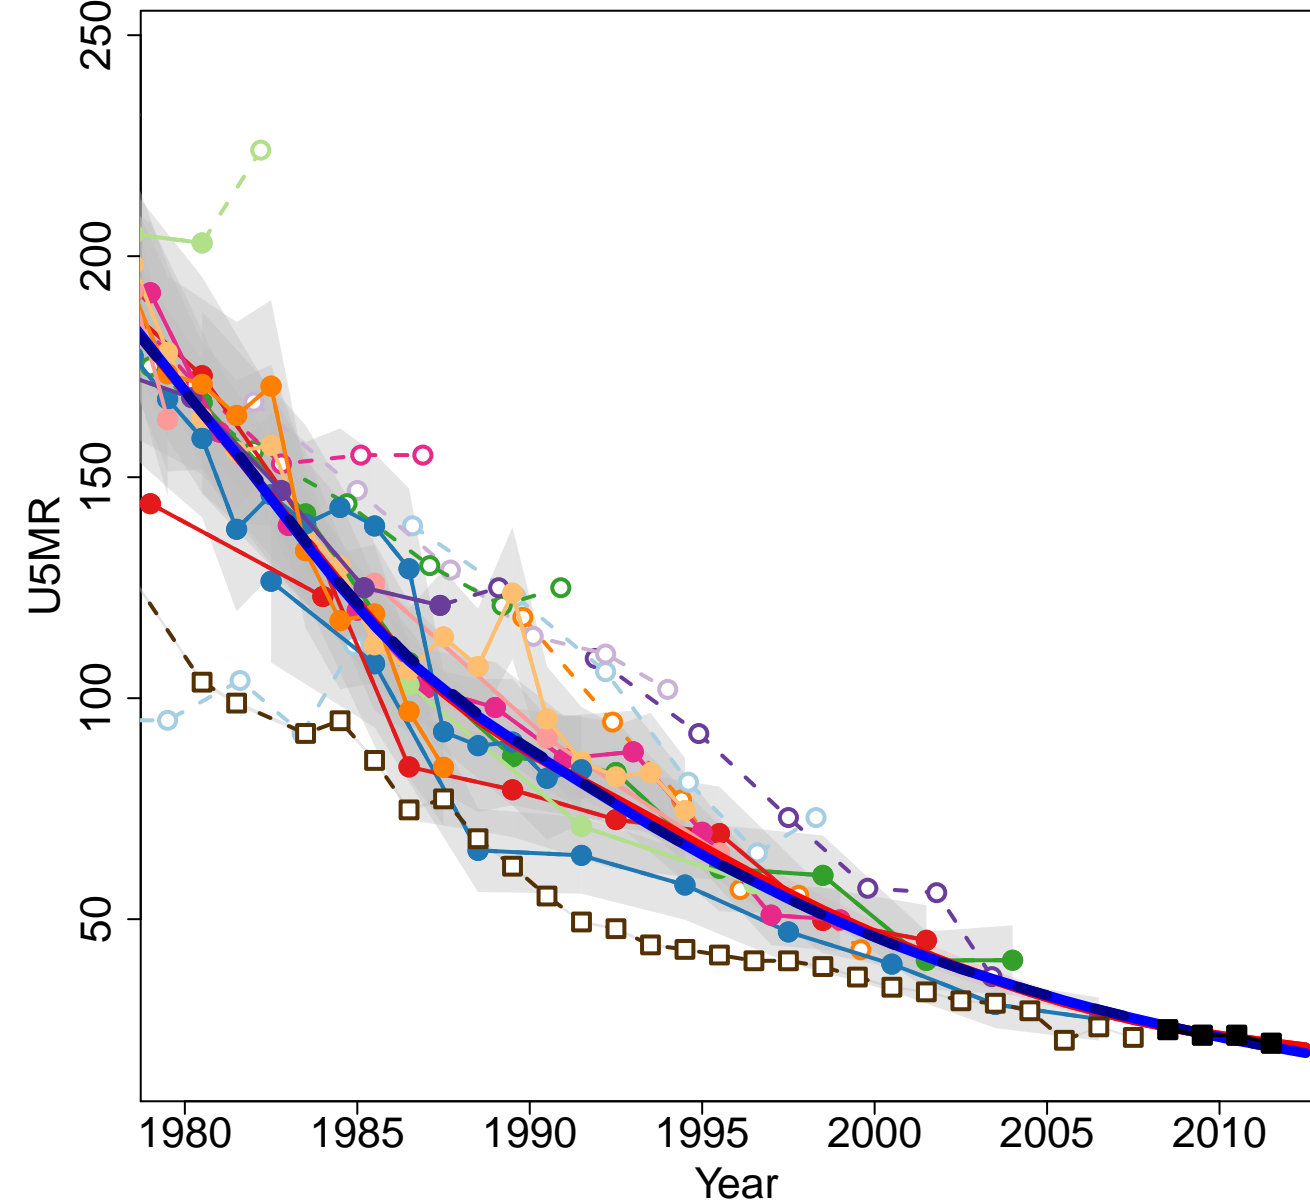

- Census 1976 (Census Indirect)
- World Fertility Survey 1980 (Other DHS Indirect)
- World Fertility Survey 1980 (Other DHS Direct)
- Contraceptive Prevalence Survey 1984 (Others Indirect)
- Census 1986 (Census Indirect)
- Demographic and Health Survey 1988–1989 (DHS Indirect)
- Demographic and Health Survey 1988–1989 (DHS Direct)
- PAPCHILD Maternal and Child Health Survey 1991 (Others Direct)
- PAPCHILD Maternal and Child Health Survey 1991 (Others Indirect)
- Demographic and Health Survey 1992–1993 (DHS Indirect)
- Demographic and Health Survey 1992–1993 (DHS Direct)
- Demographic and Health Survey 1995–1996 (DHS Indirect)
- Demographic and Health Survey 1995–1996 (DHS Direct)
- Demographic and Health Survey 1997 (Other DHS Direct)
- Demographic and Health Survey 1998 (Other DHS Direct)
- Demographic and Health Survey 2000 (DHS Indirect)
- Demographic and Health Survey 2000 (DHS Direct)
- Demographic and Health Survey 2003 (Other DHS Indirect)
- Demographic and Health Survey 2003 (Other DHS Direct)
- Demographic and Health Survey 2005 (DHS Indirect)
- Demographic and Health Survey 2005 (DHS Direct)
- Demographic and Health Survey 2008 (DHS Direct)
- VR WHO
- VR WHO (Recalculated)

# El Salvador

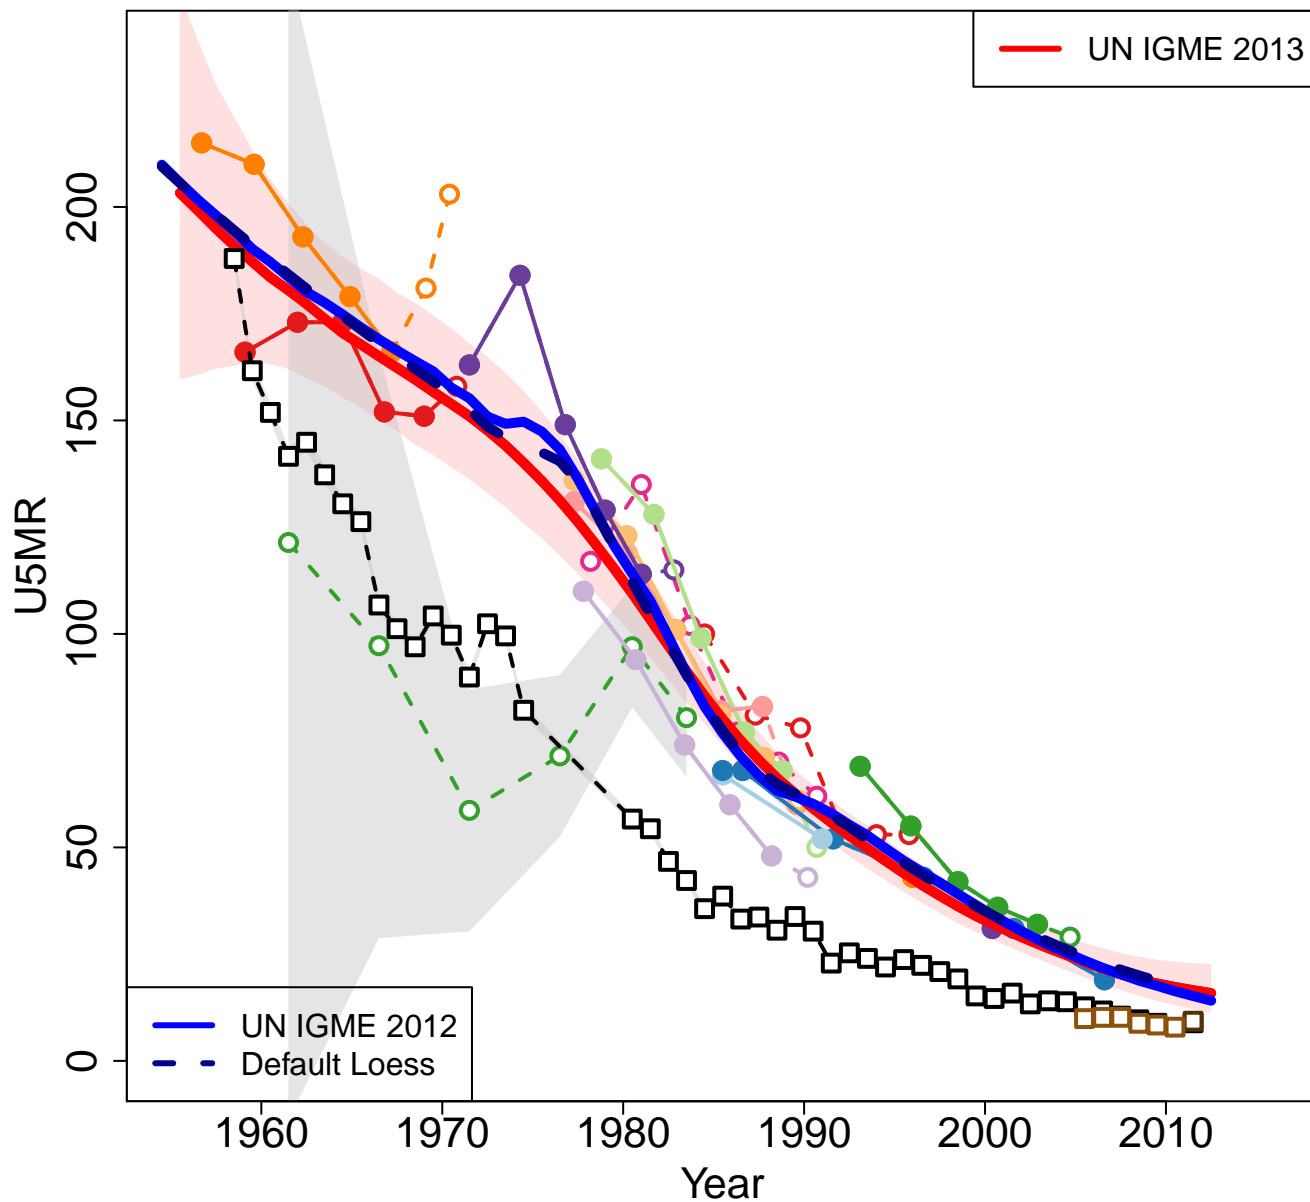

# Zoomed in

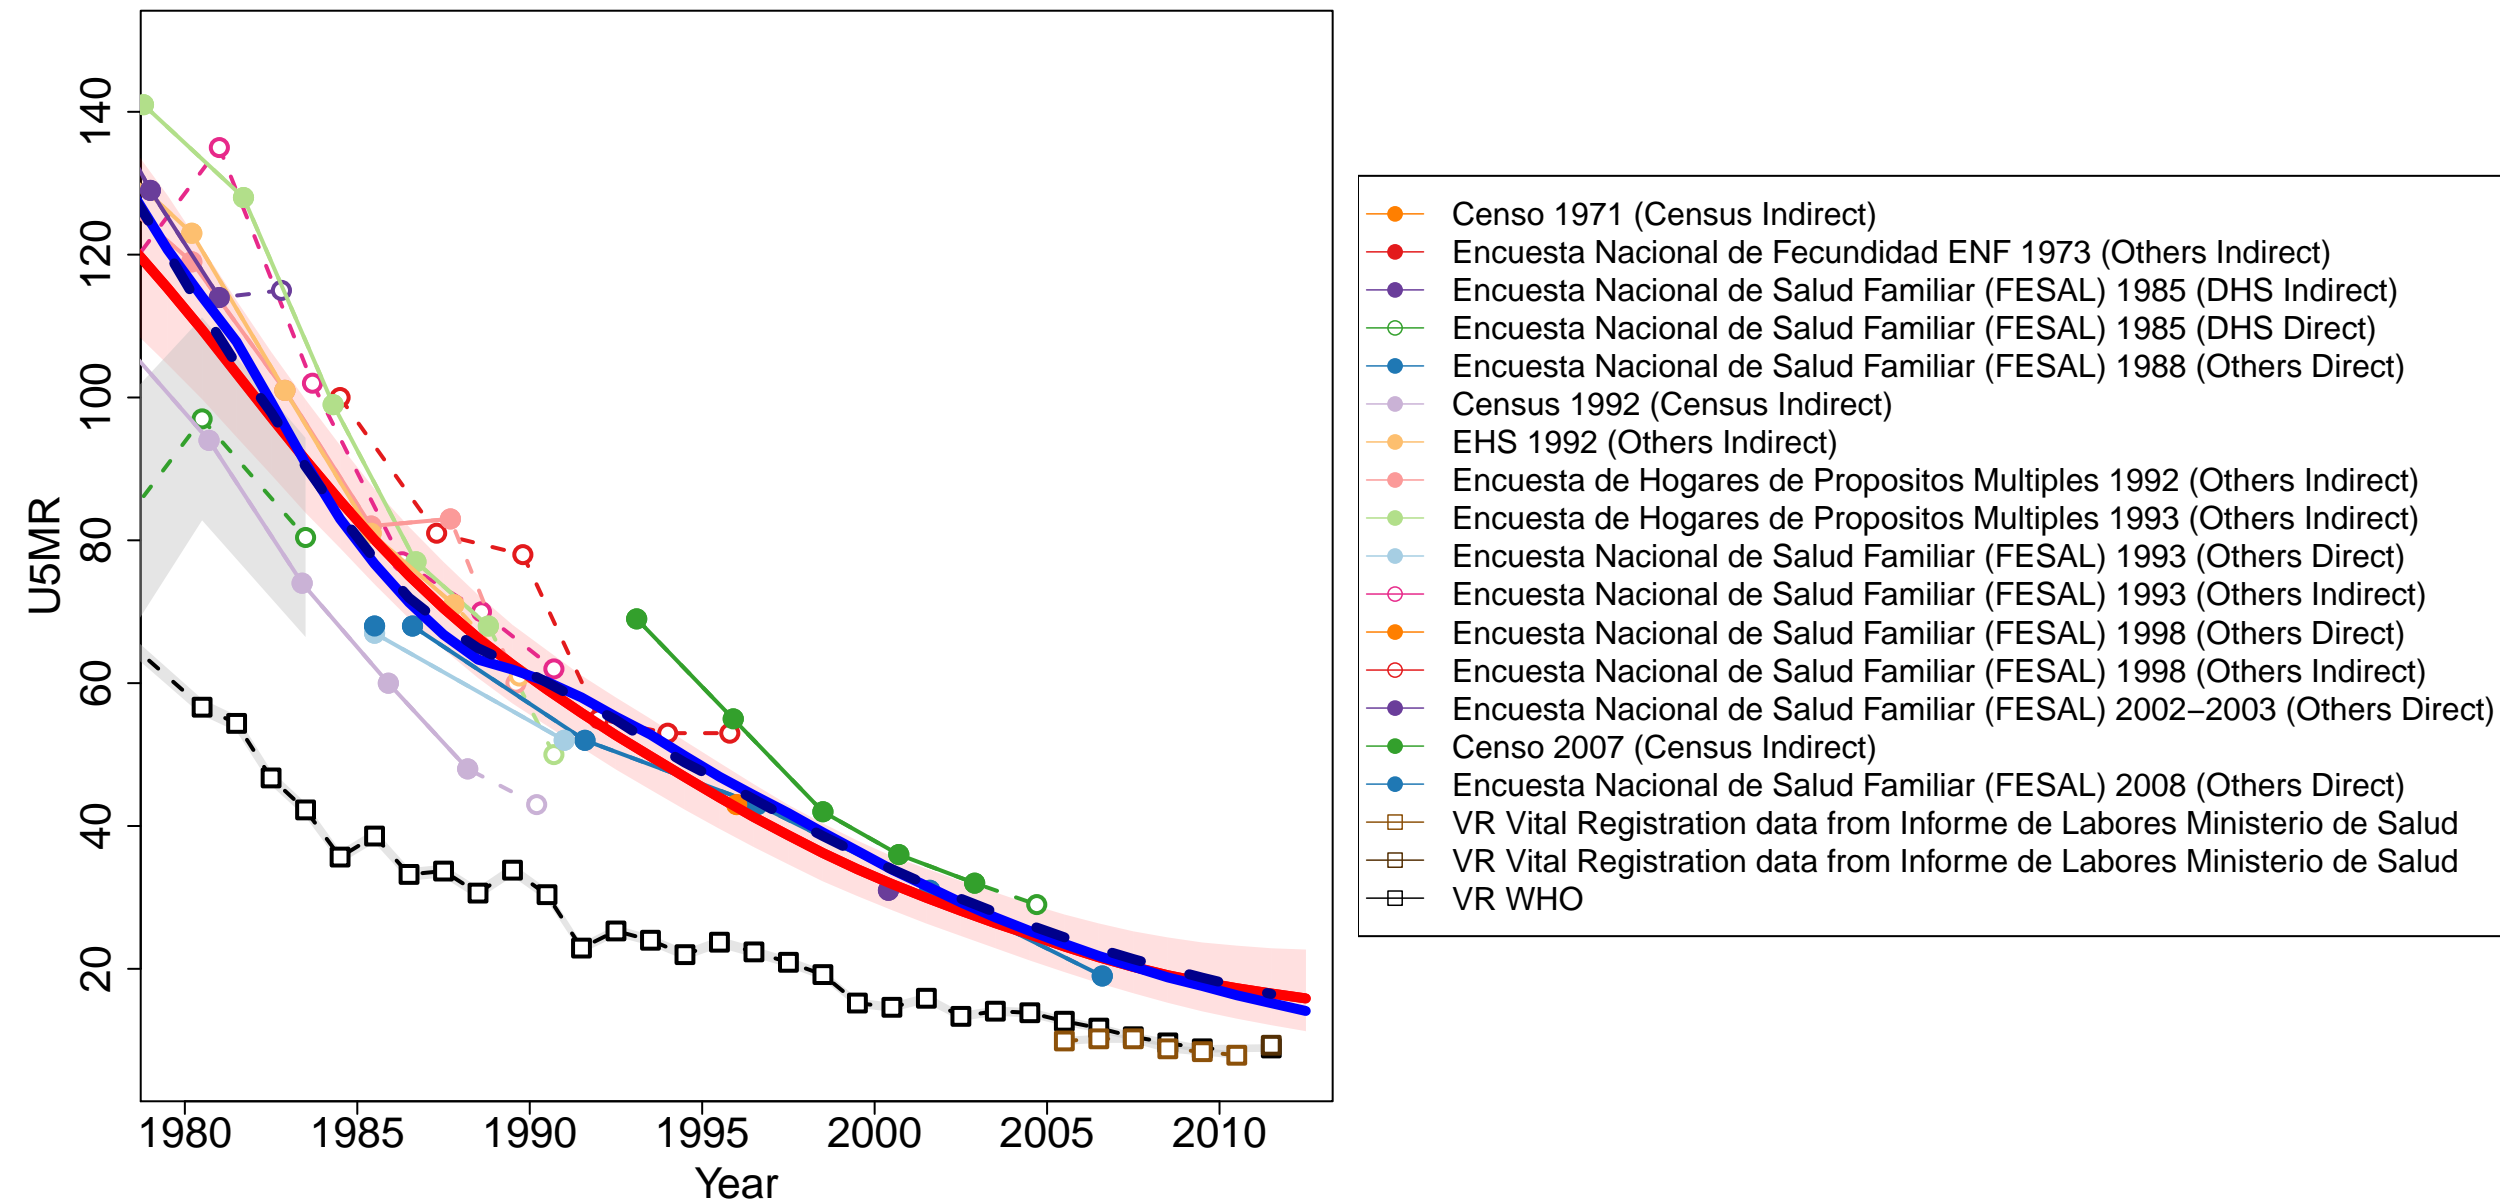



# Equatorial Guinea

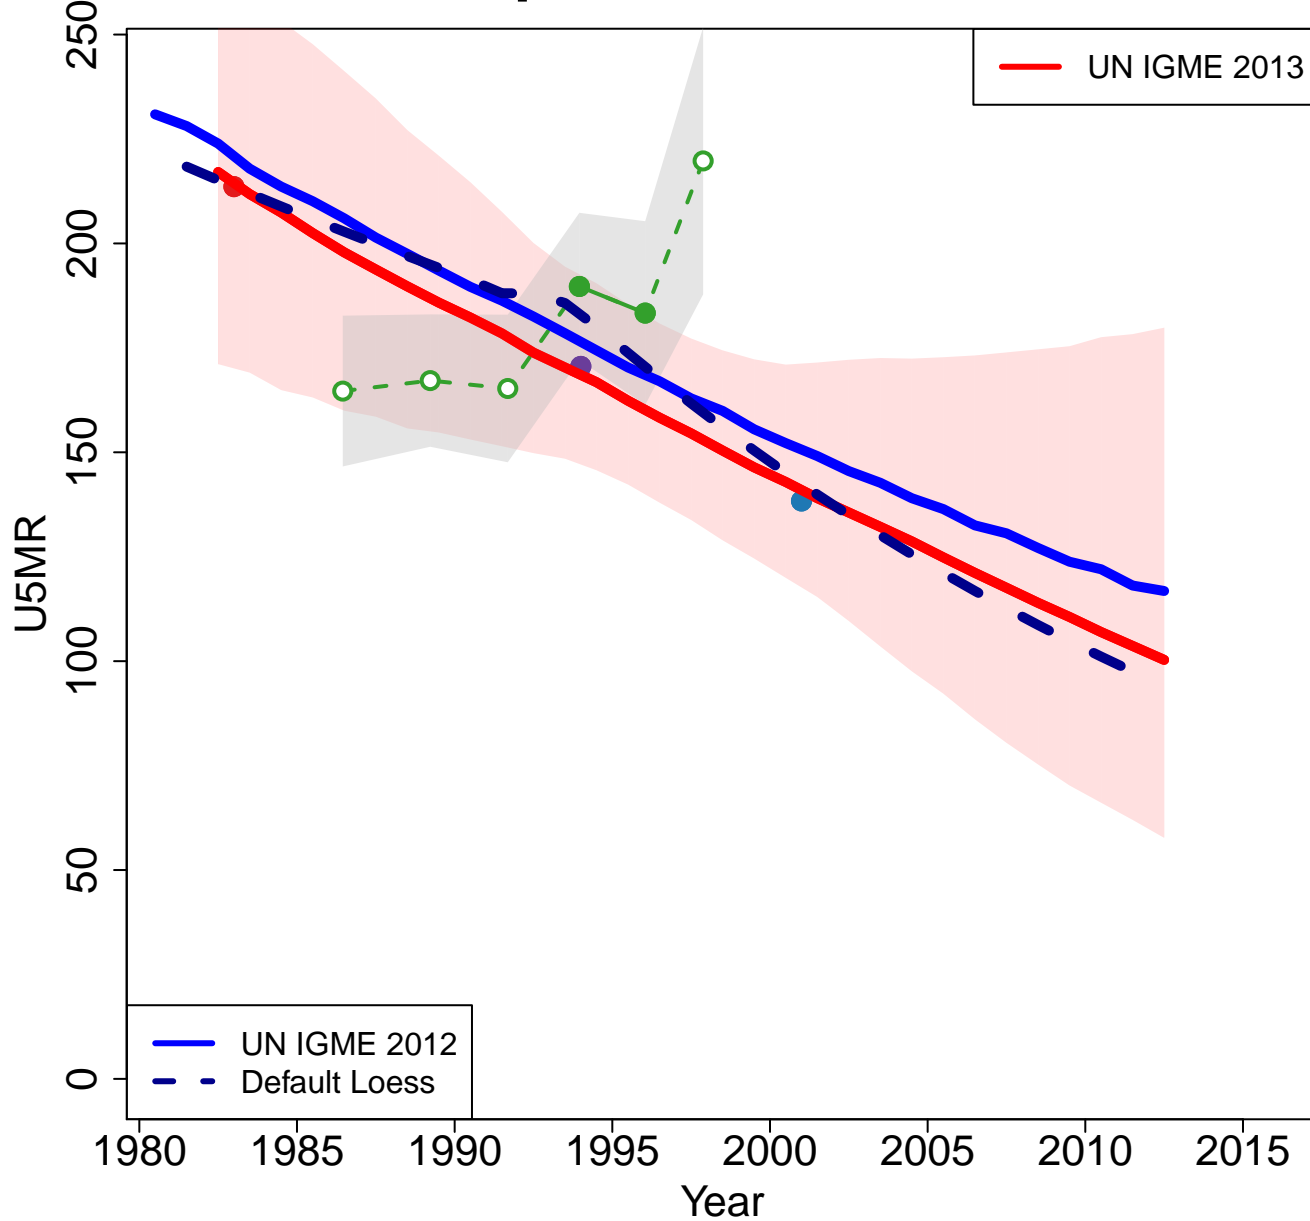

# Zoomed in

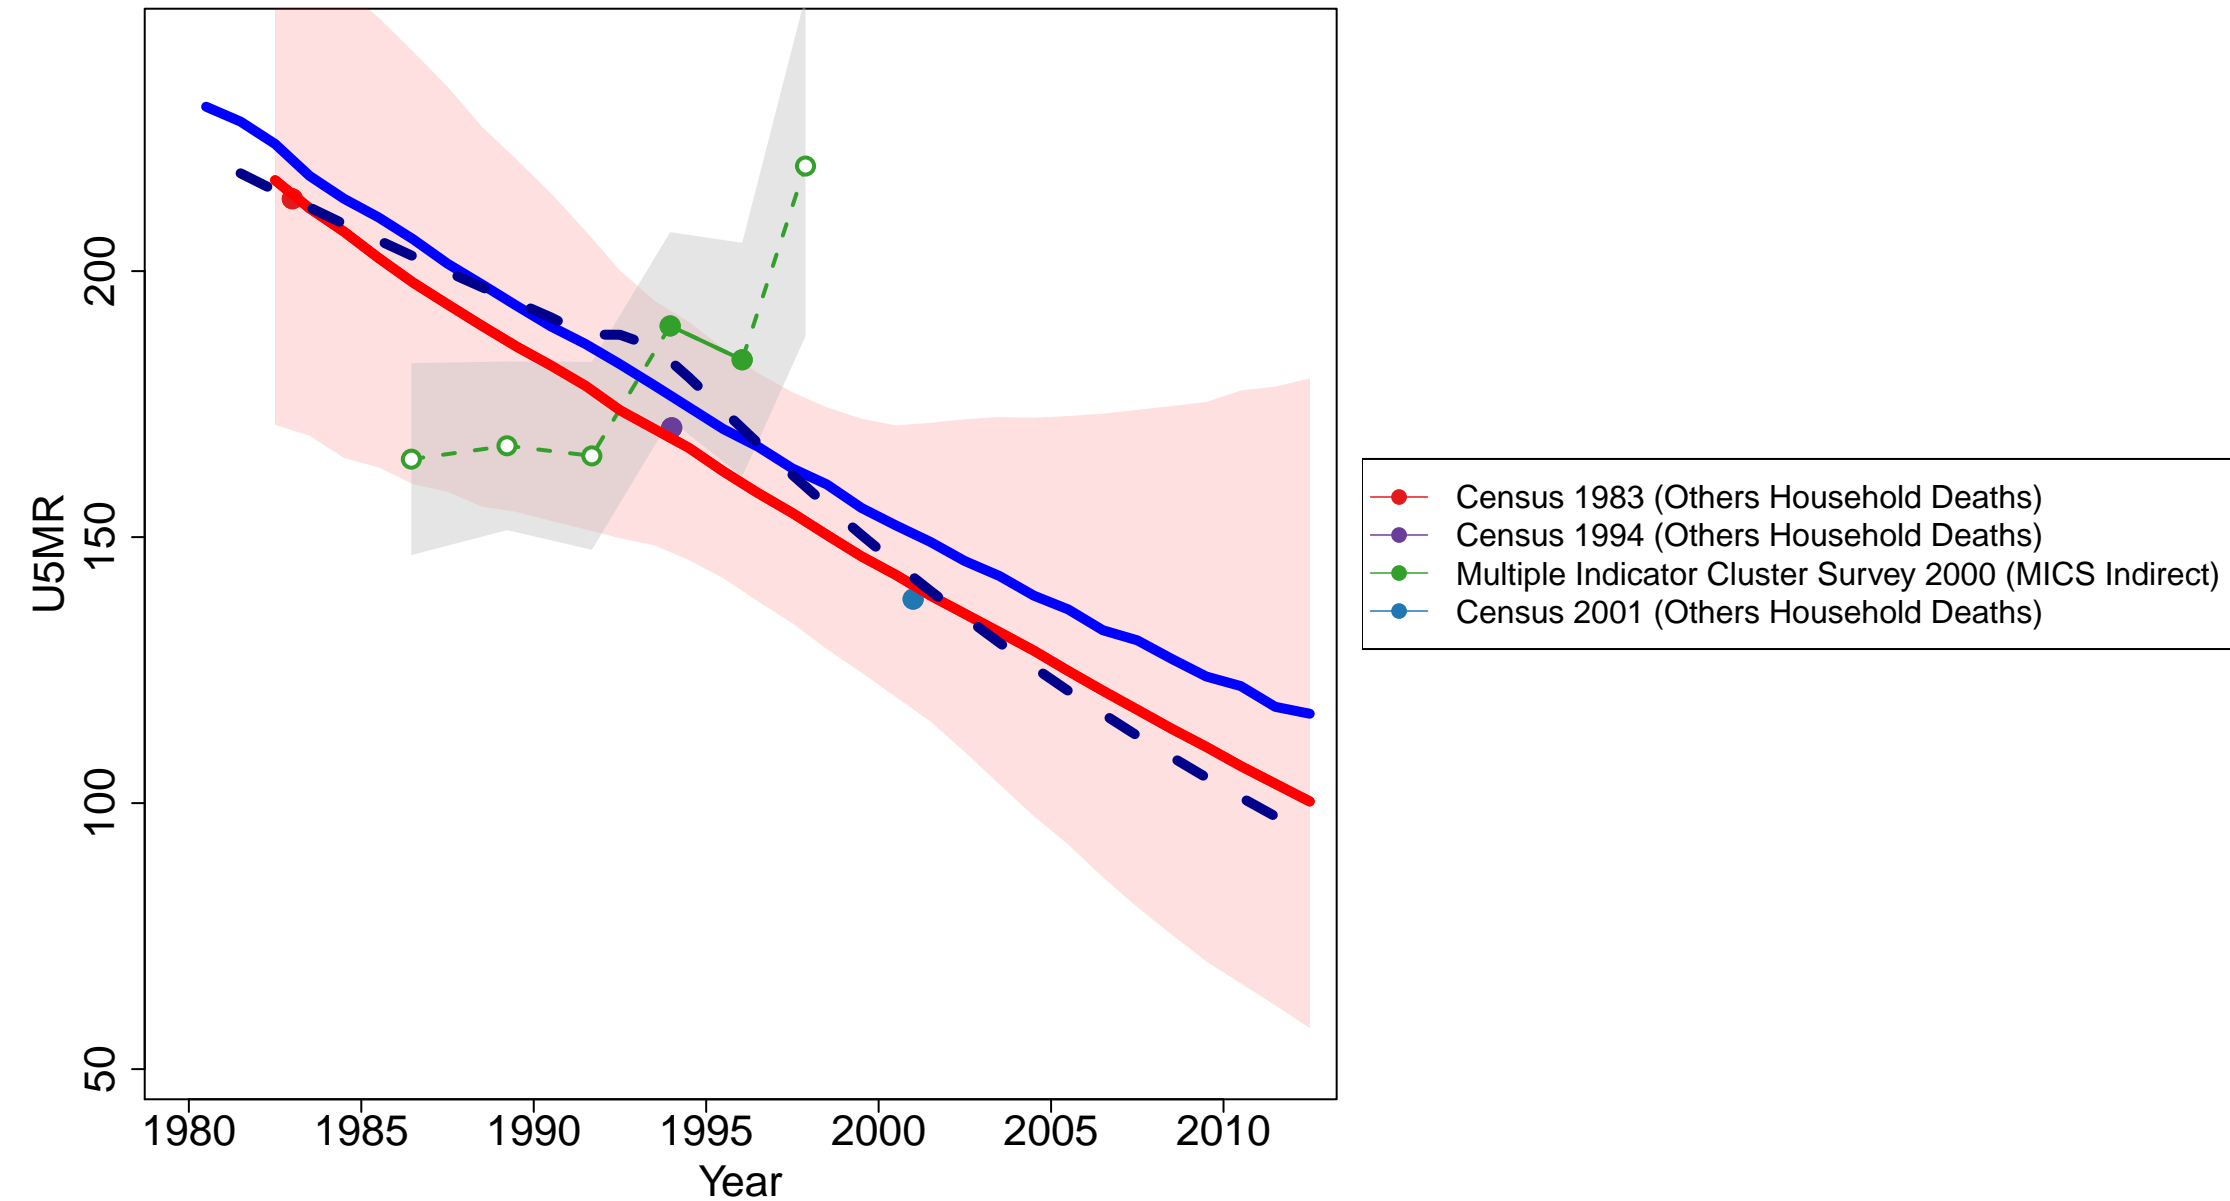

# Eritrea

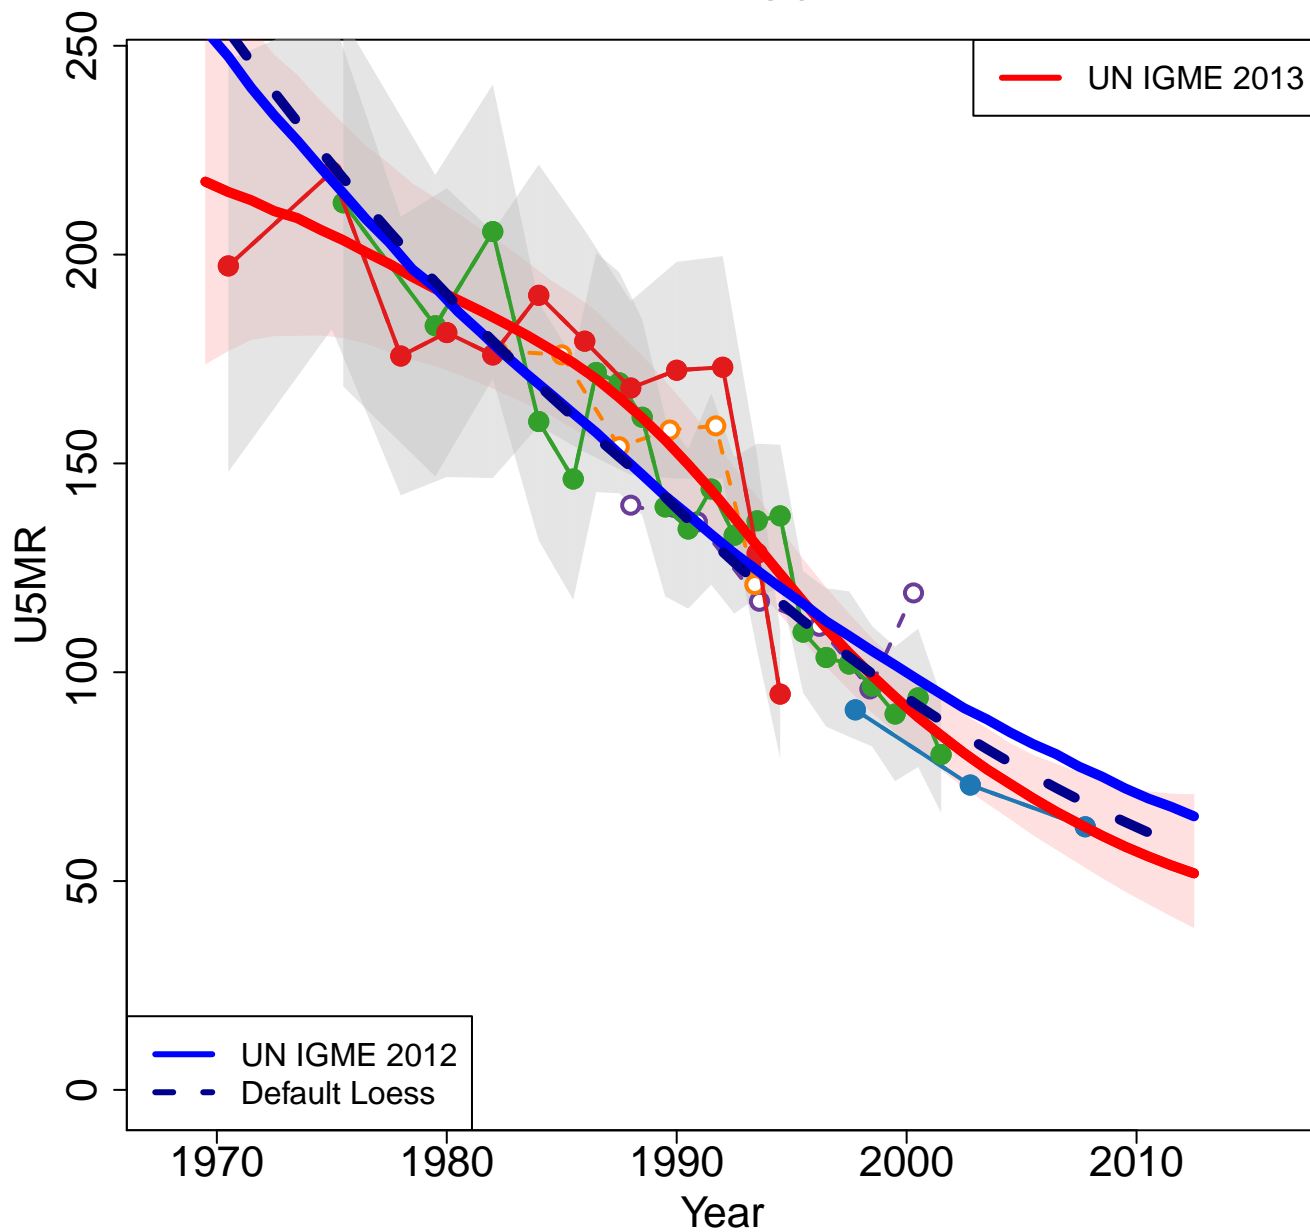

# Zoomed in

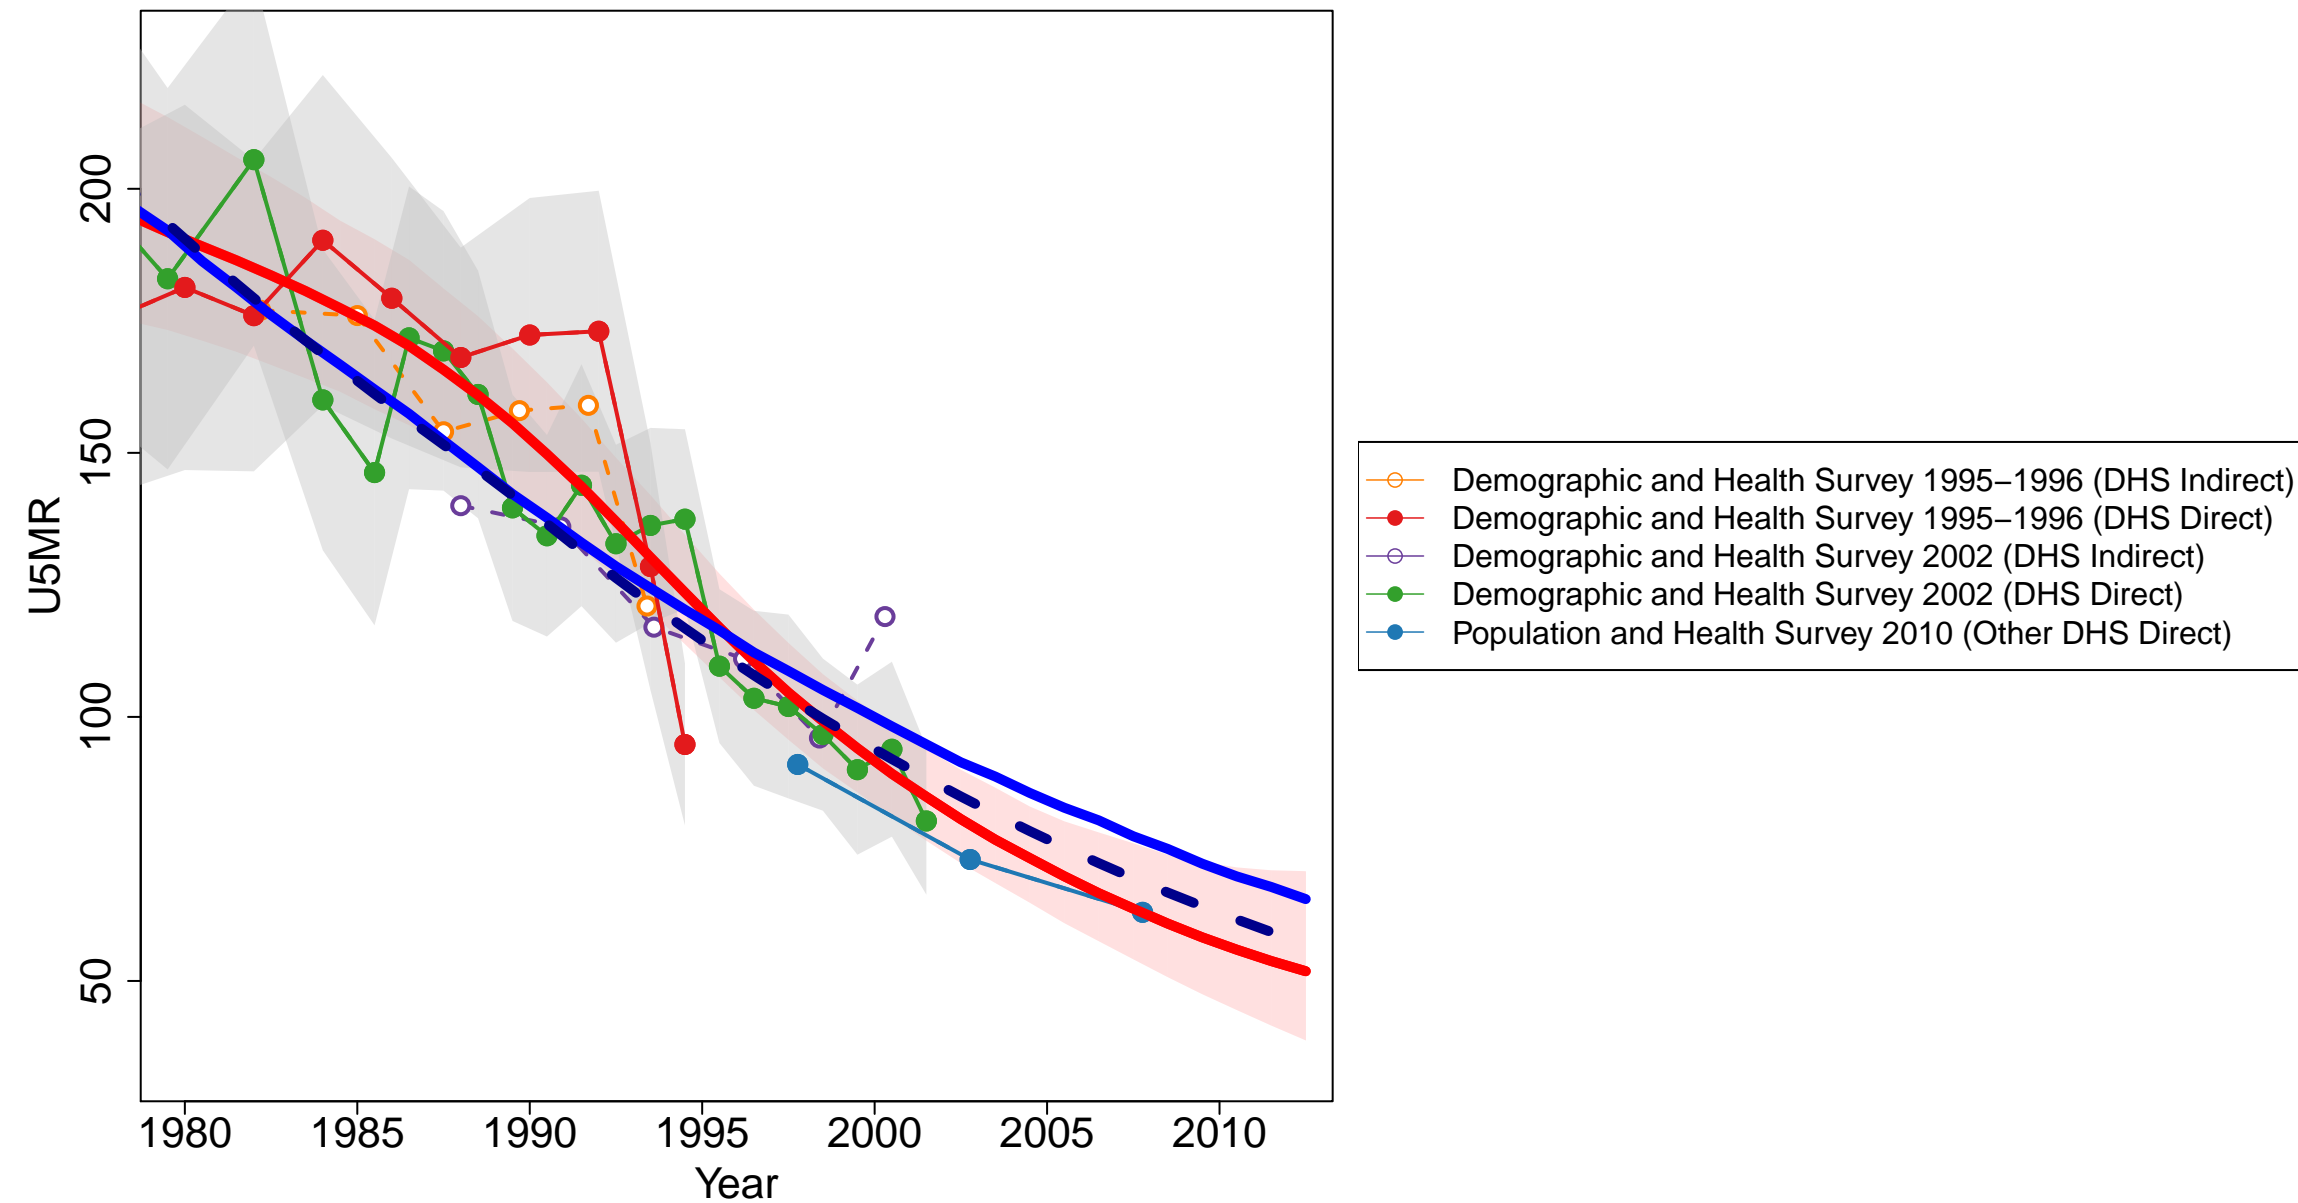



# Ethiopia

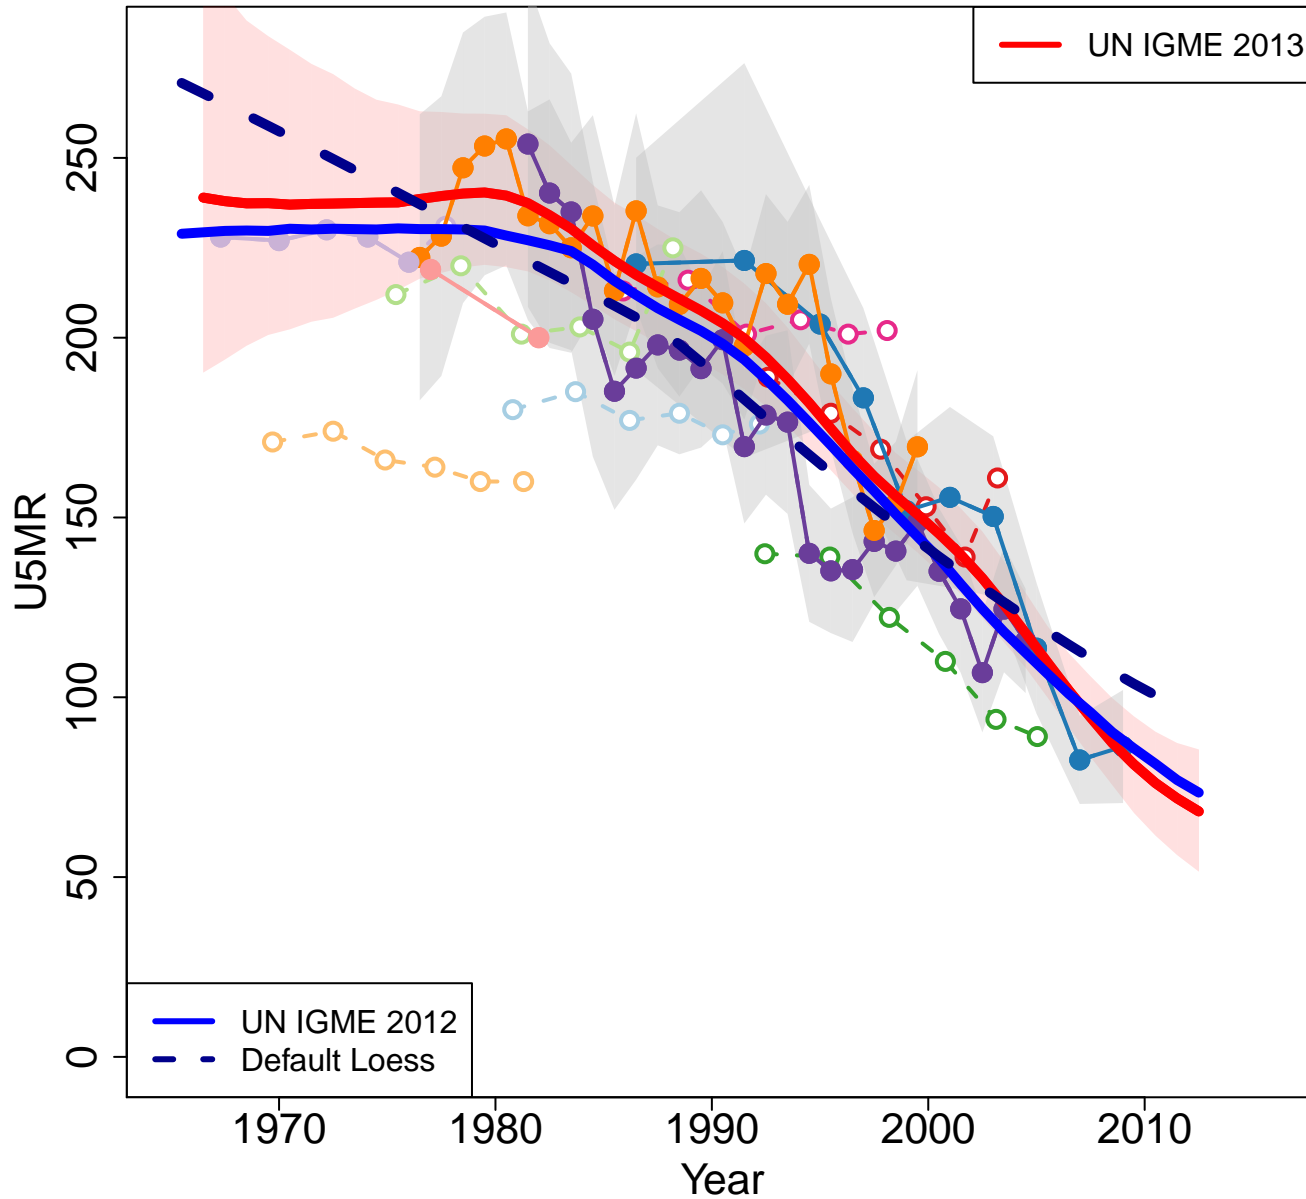

# Zoomed in

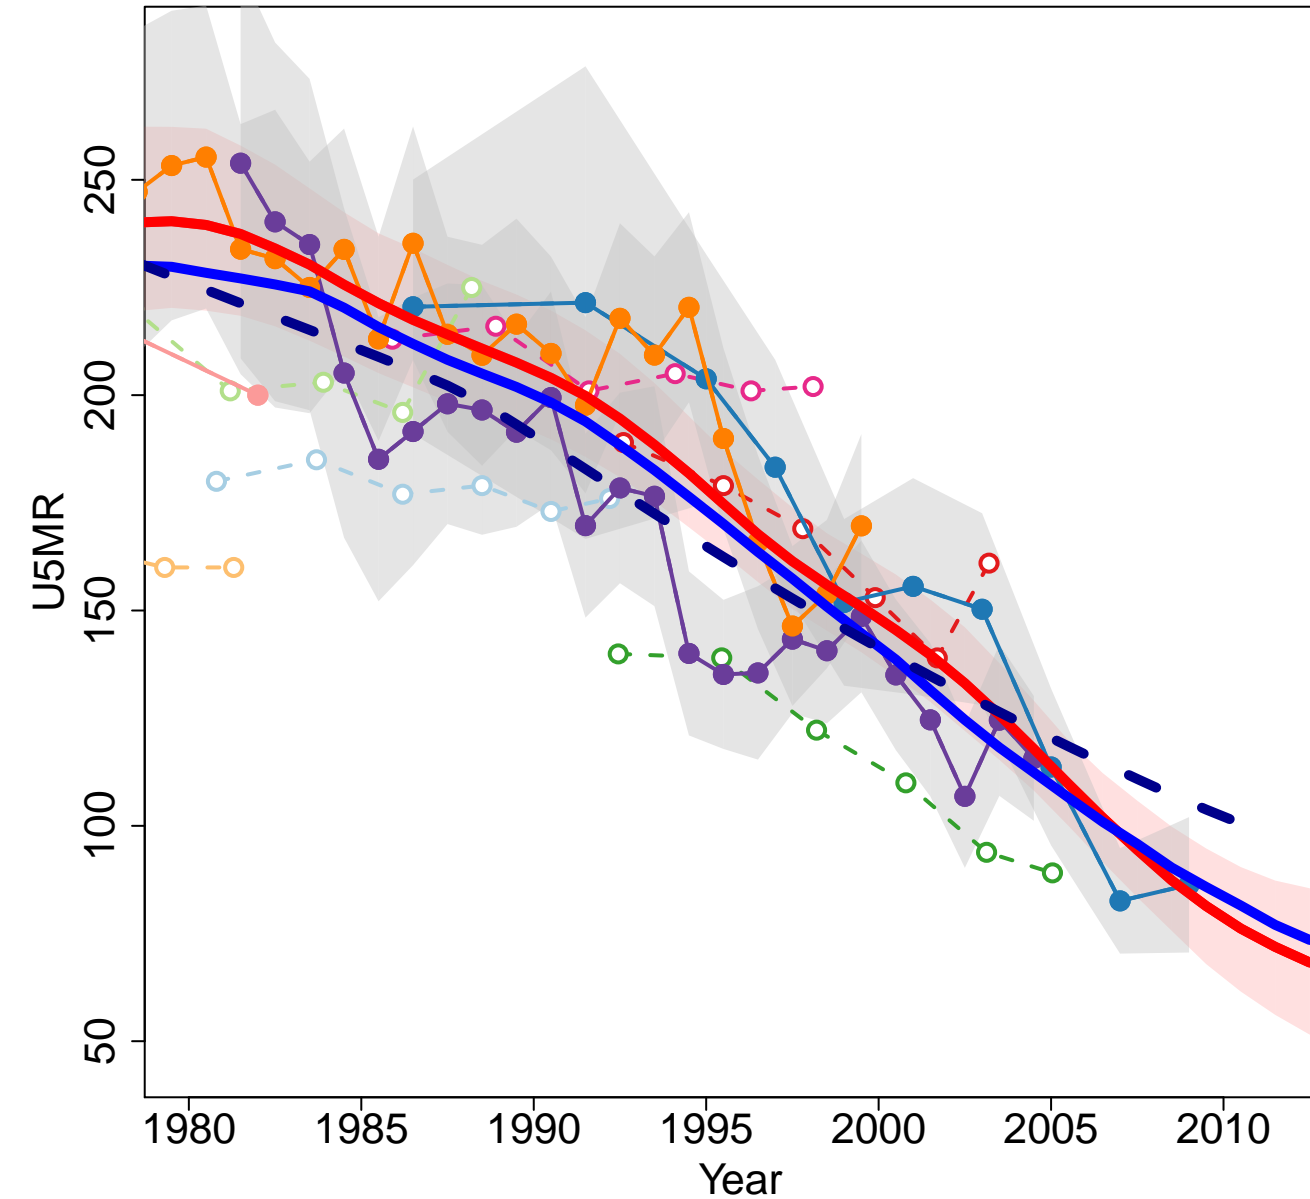

- Demographic Survey 1981 (Others Indirect)
- Census 1984 (Census Indirect)
- National Family and Fertility Survey 1990 (Others Direct)
- National Family and Fertility Survey 1990 (Others Indirect)
- Census 1994 (Census Indirect)
- Demographic and Health Survey 2000 (DHS Indirect)
- Demographic and Health Survey 2000 (DHS Direct)
- Demographic and Health Survey 2005 (DHS Indirect)
- Demographic and Health Survey 2005 (DHS Direct)
- Census 2007 (Census Indirect)
- Demographic and Health Survey 2010–2011 (DHS Direct)

# Fiji

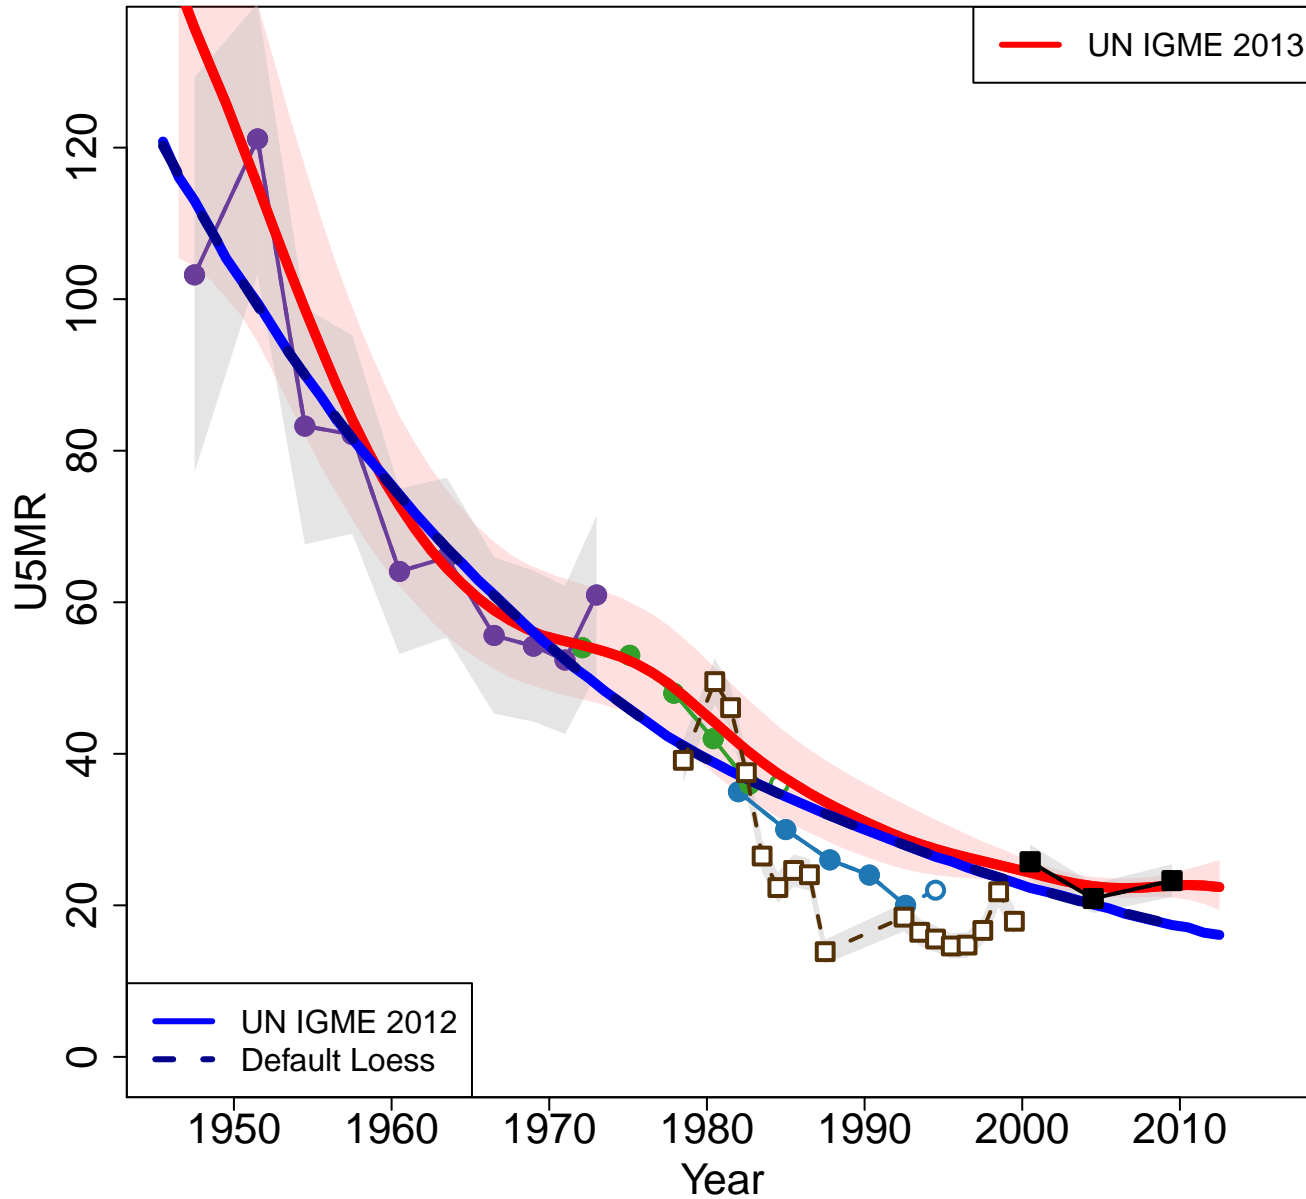

# Zoomed in

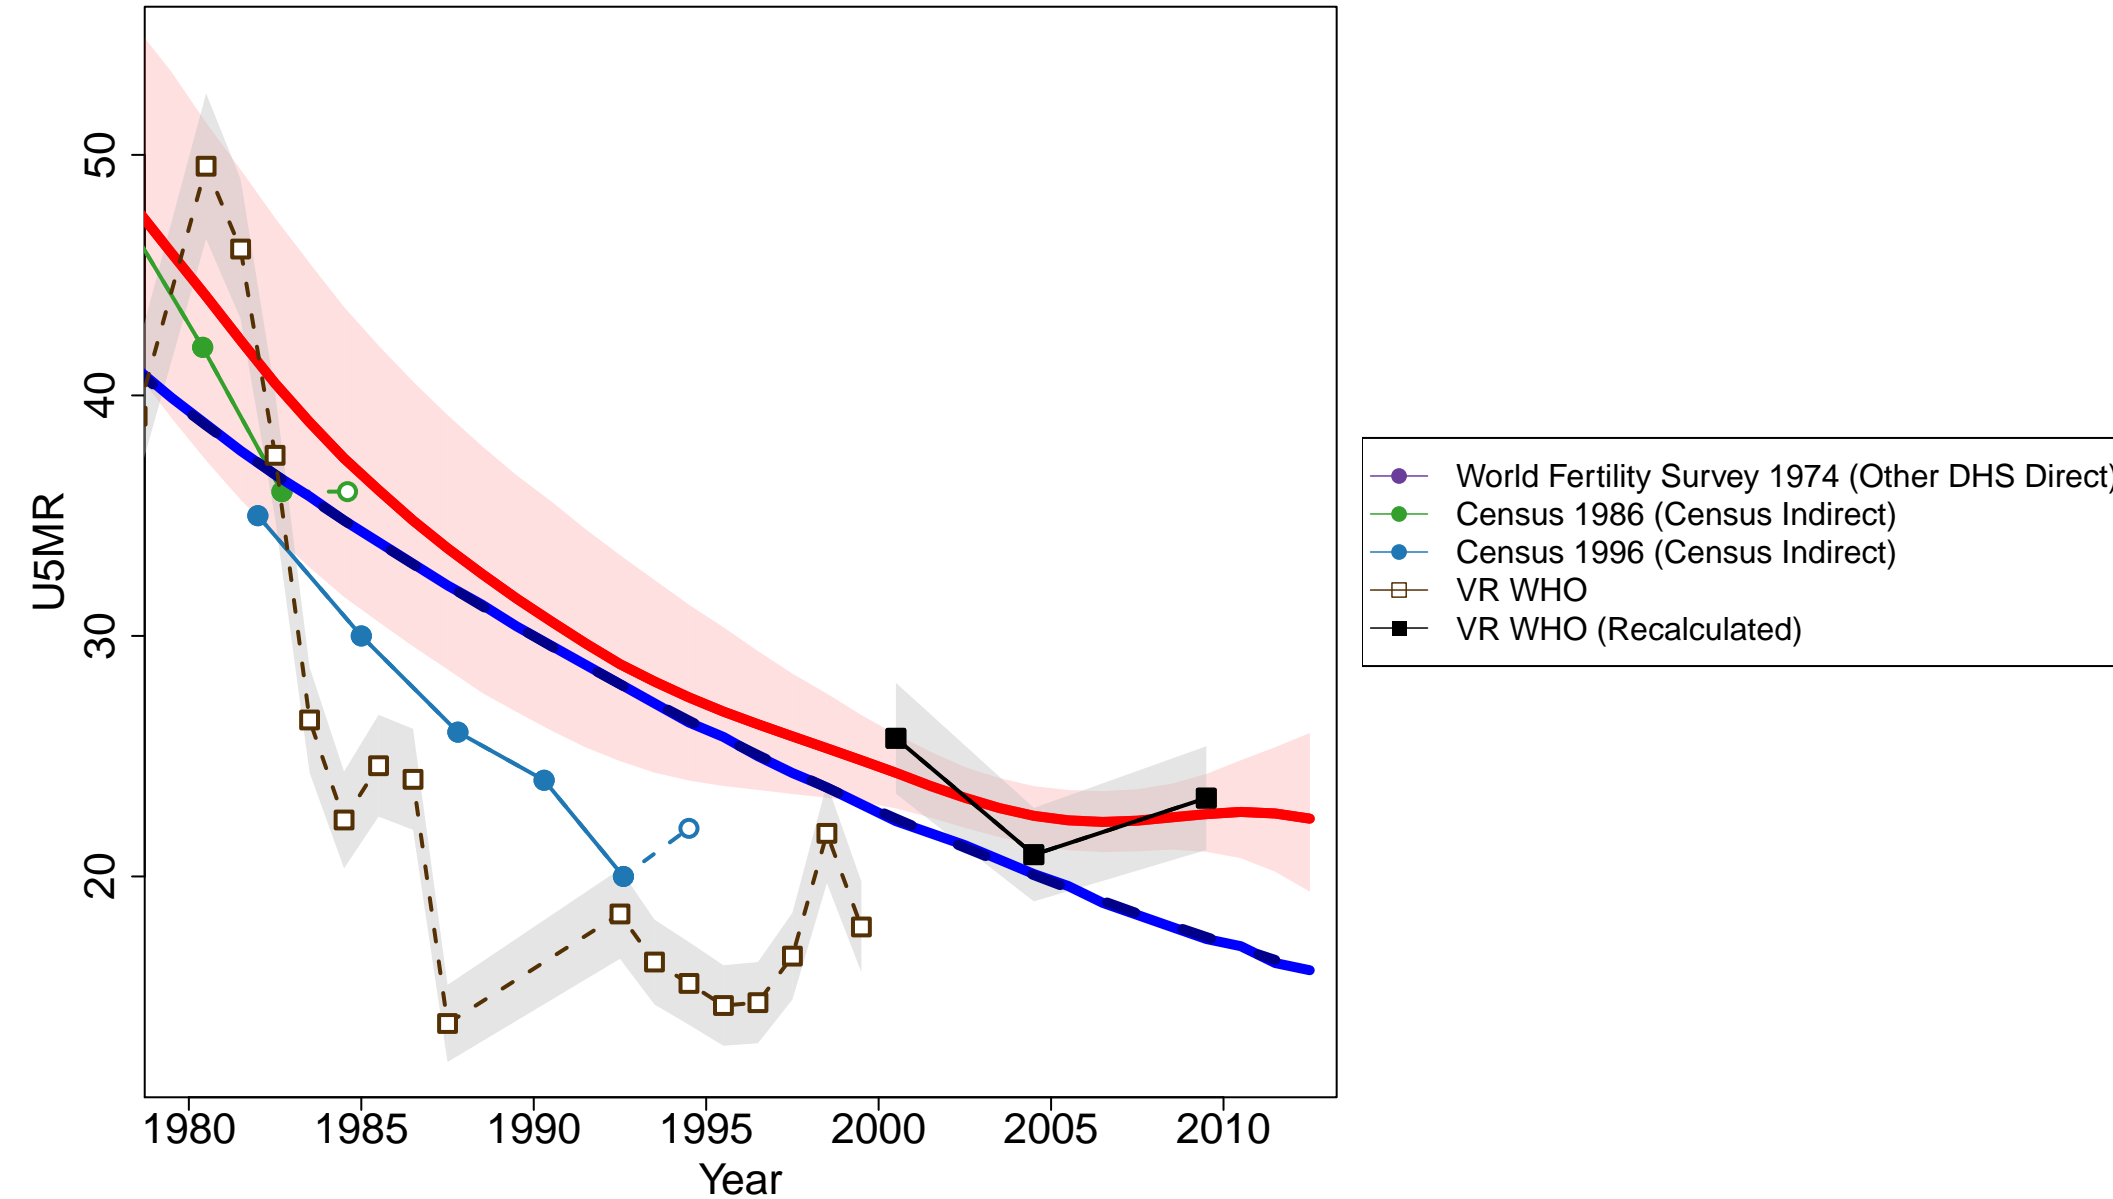

# Gambia The

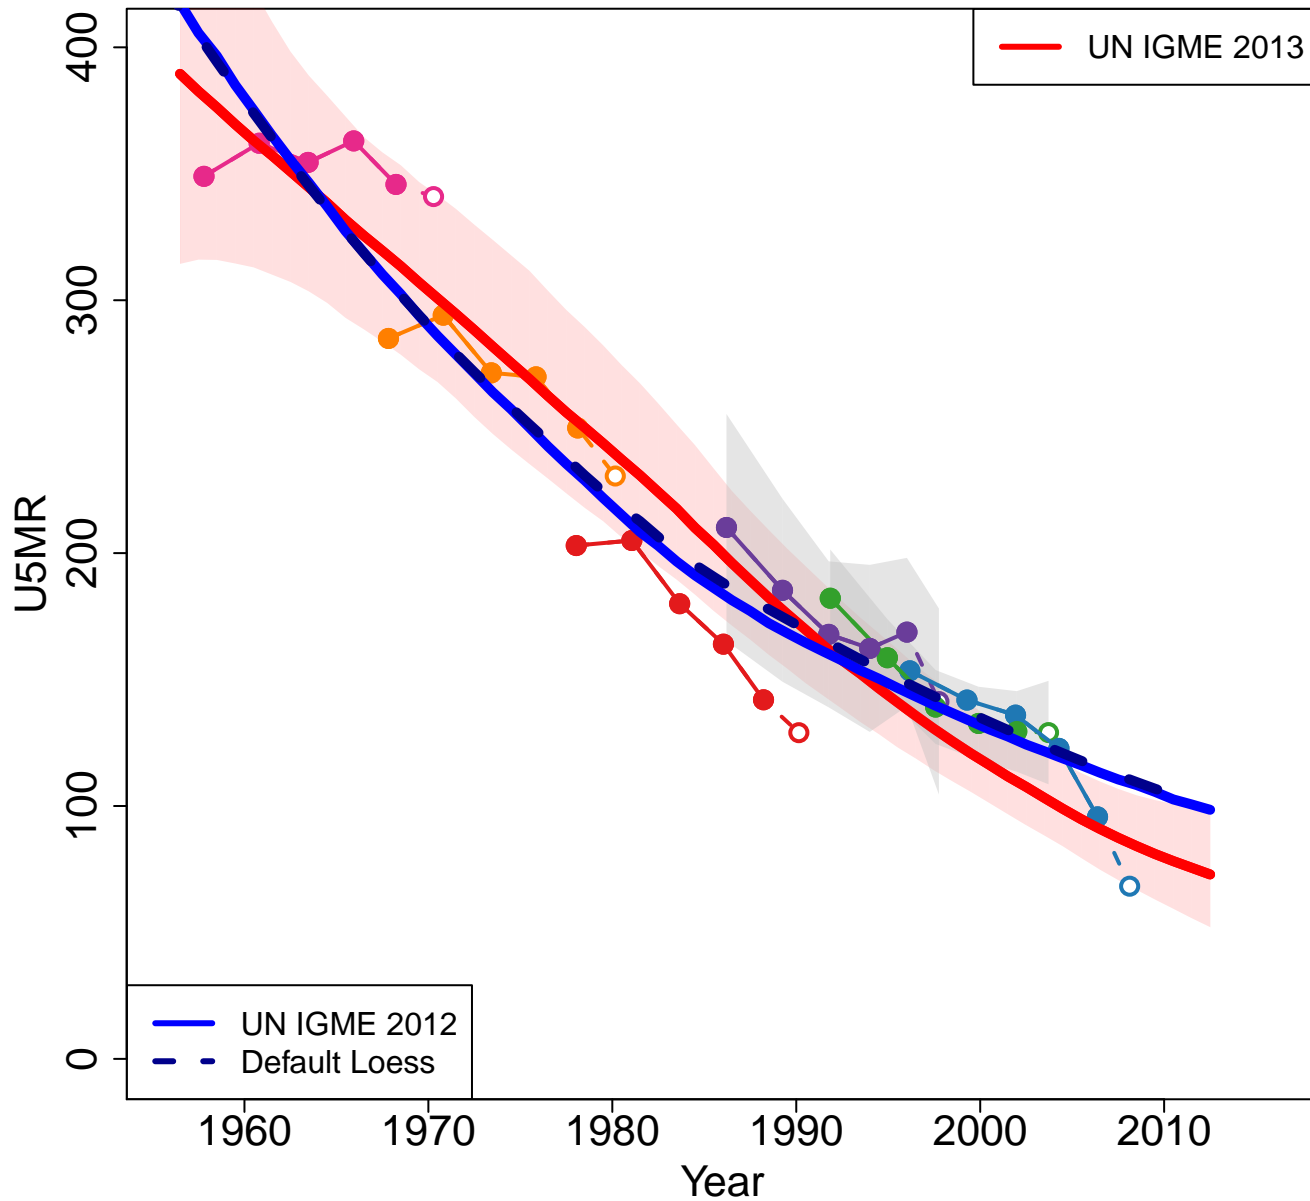

# Zoomed in

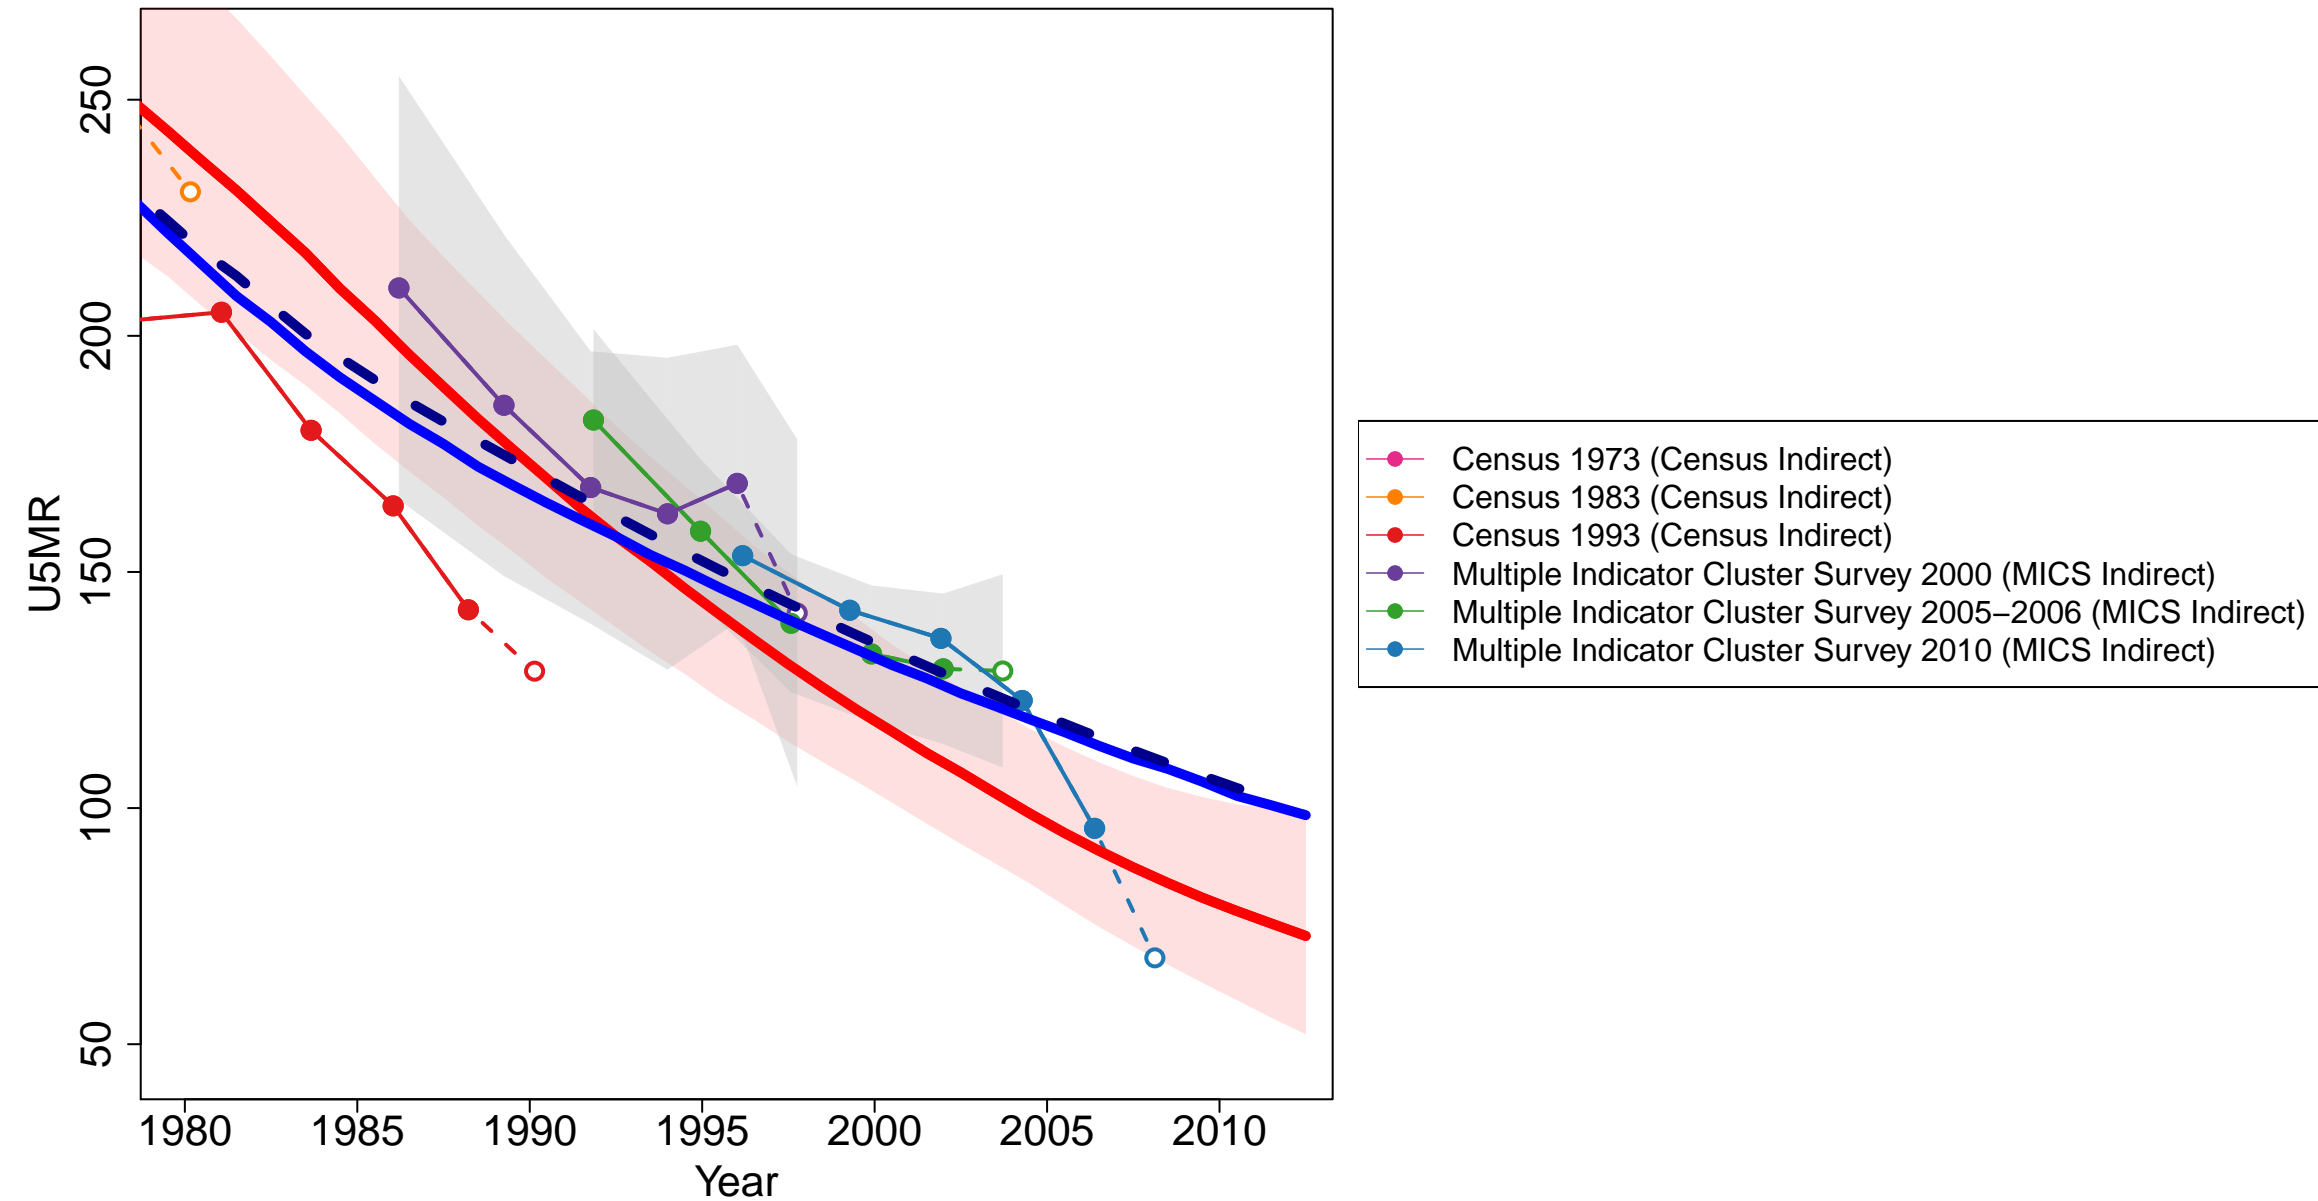

# Georgia

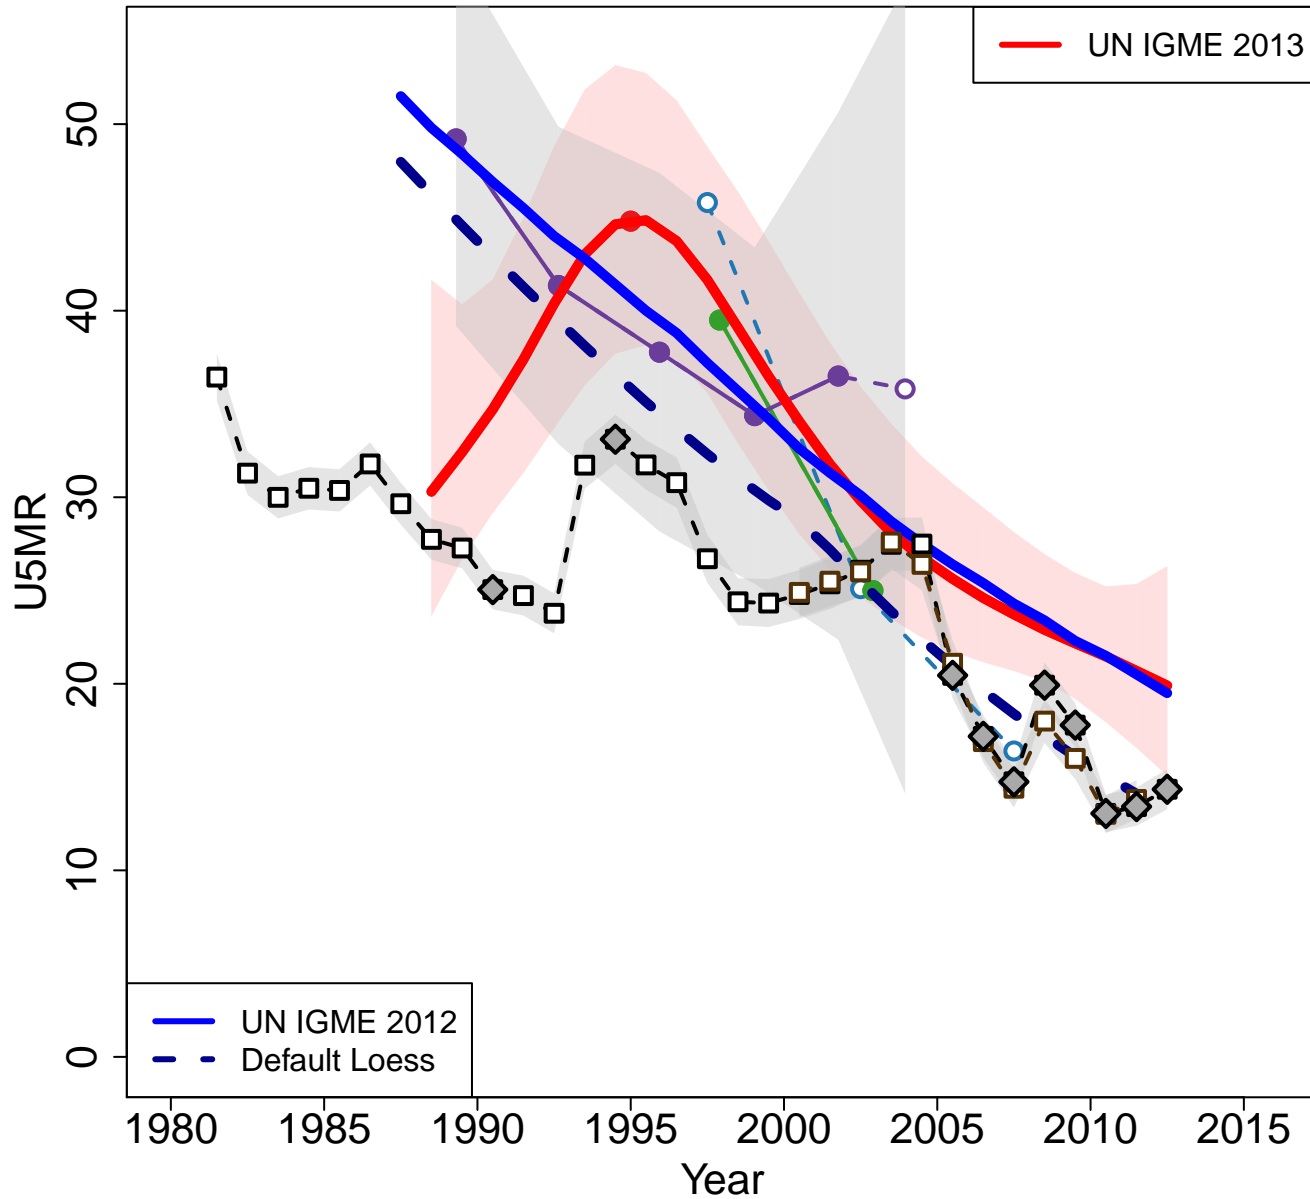

# Zoomed in

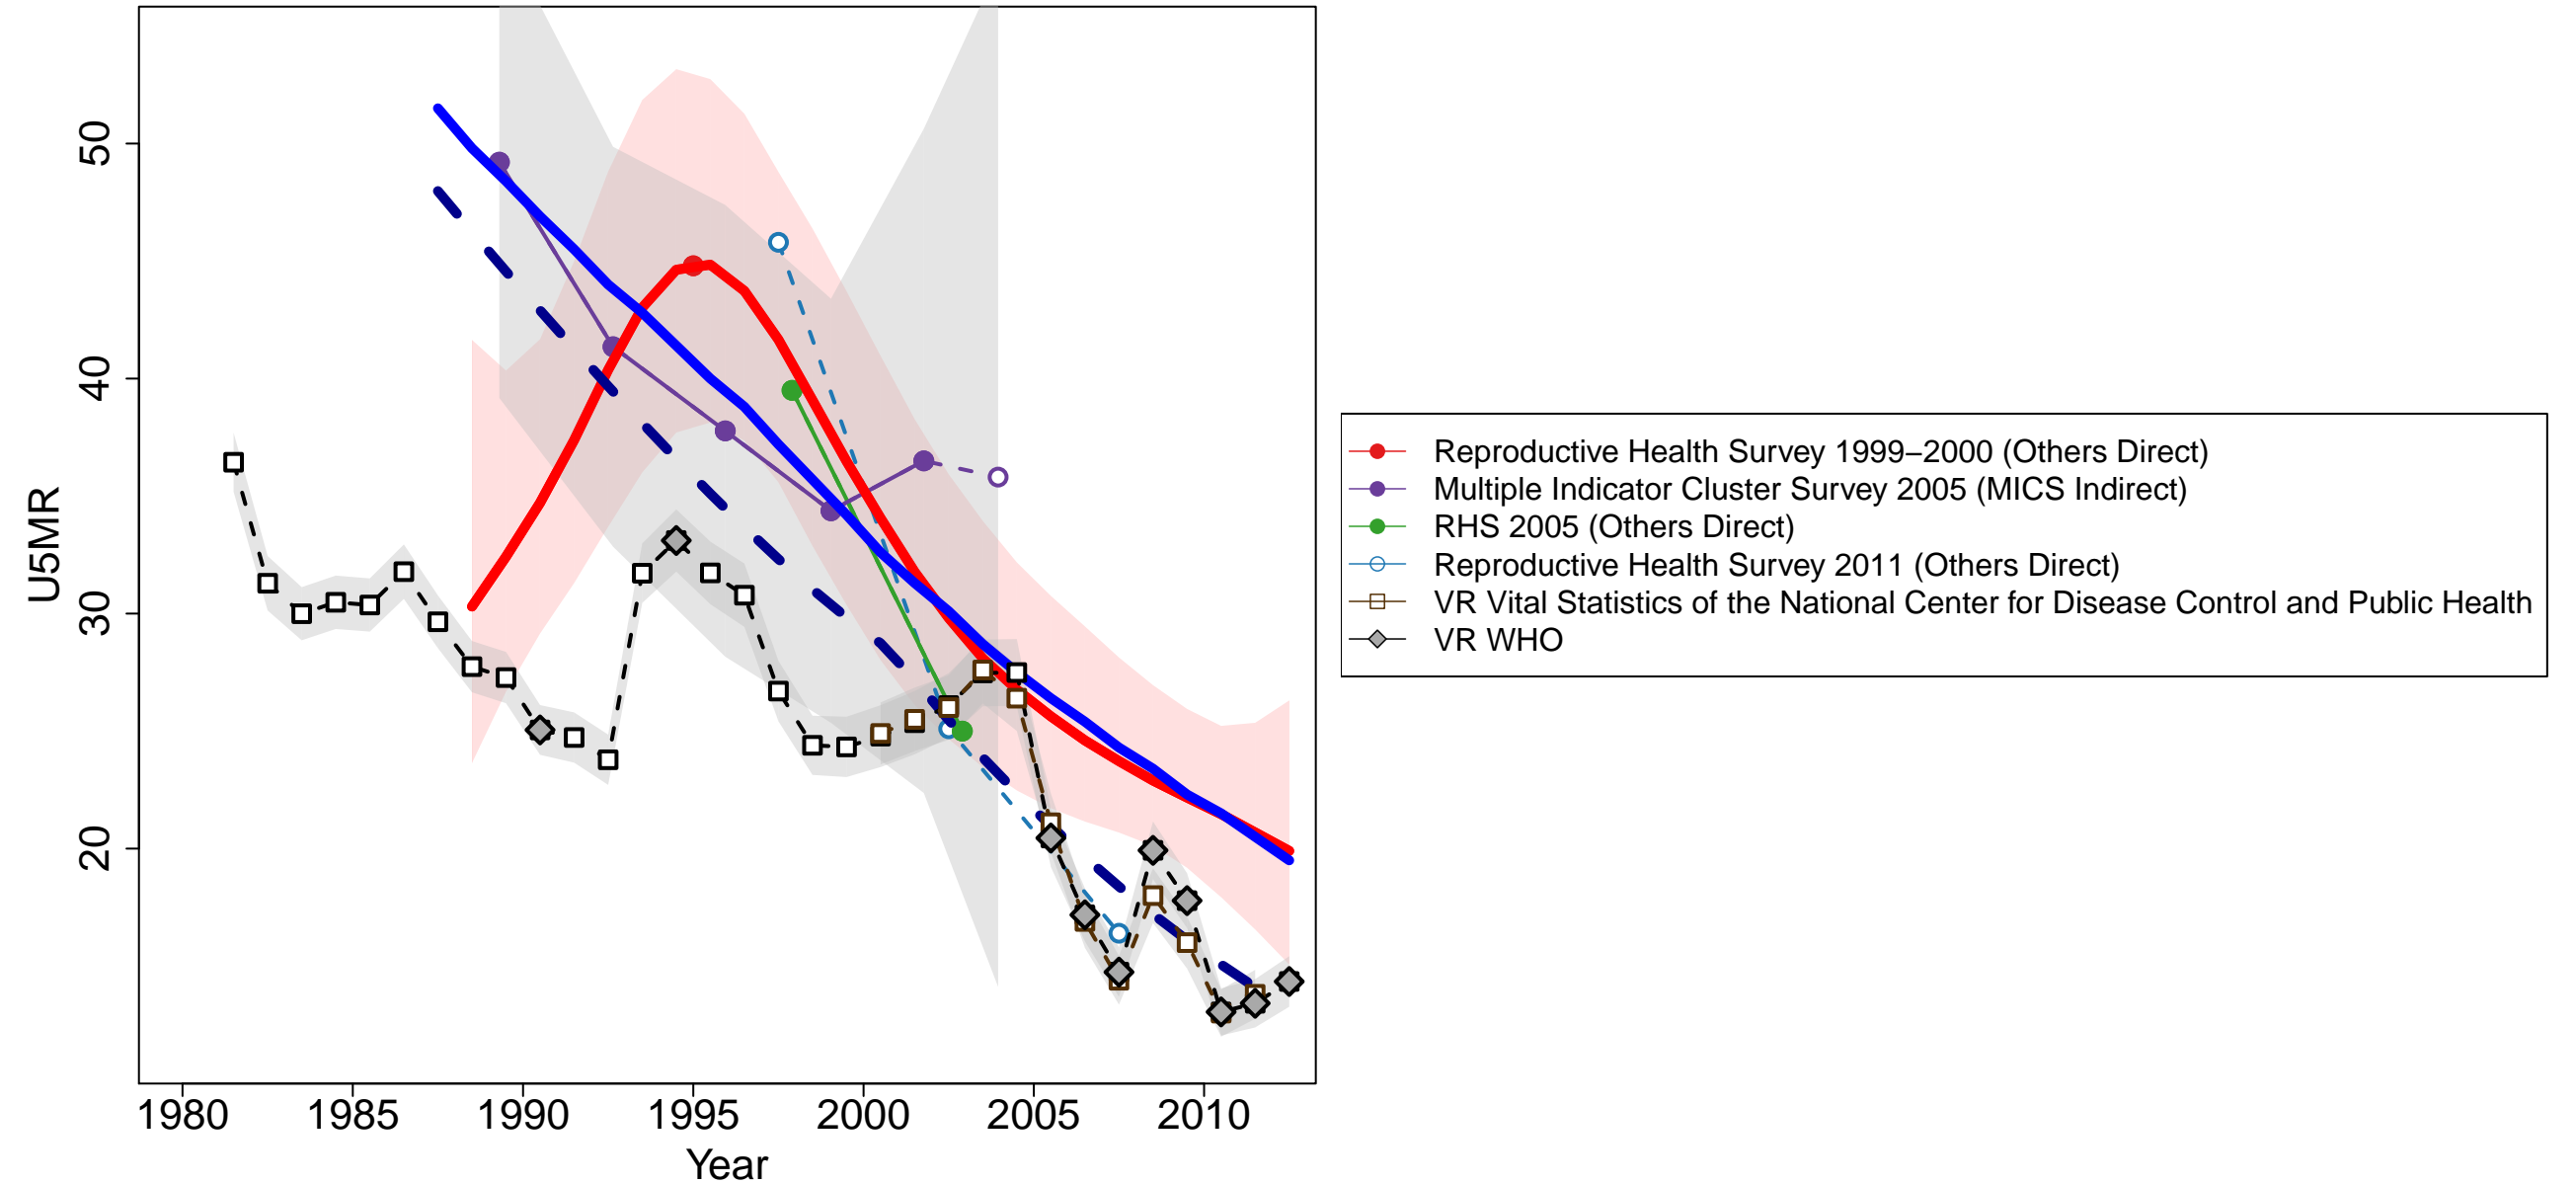

# Ghana

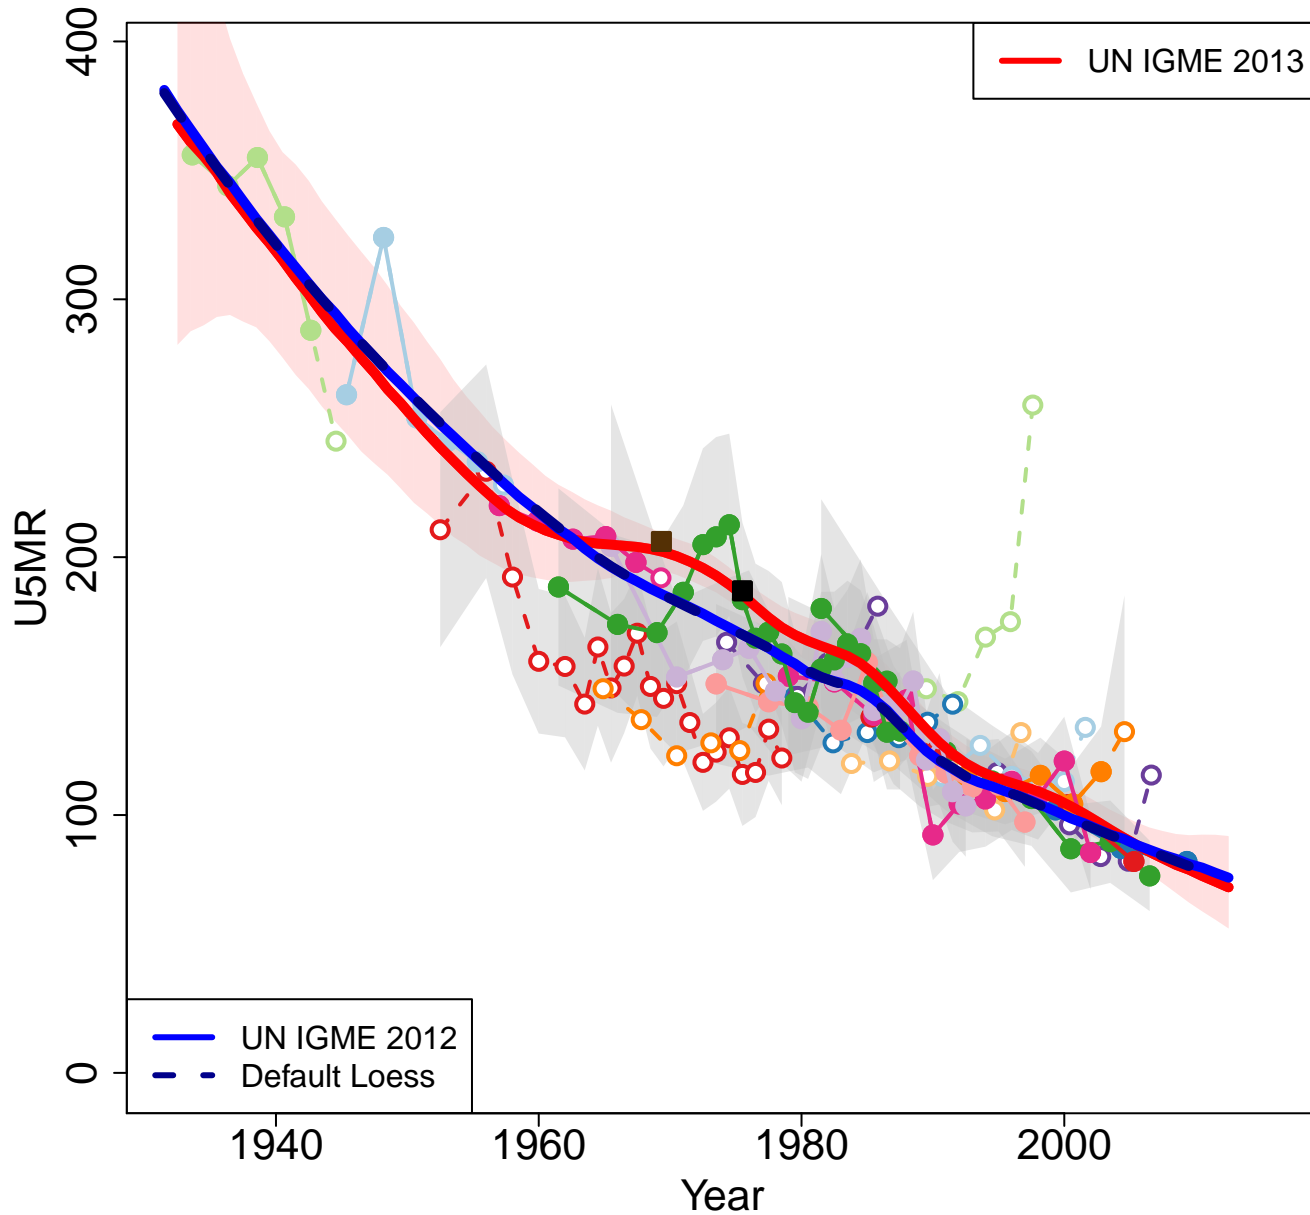

# Zoomed in

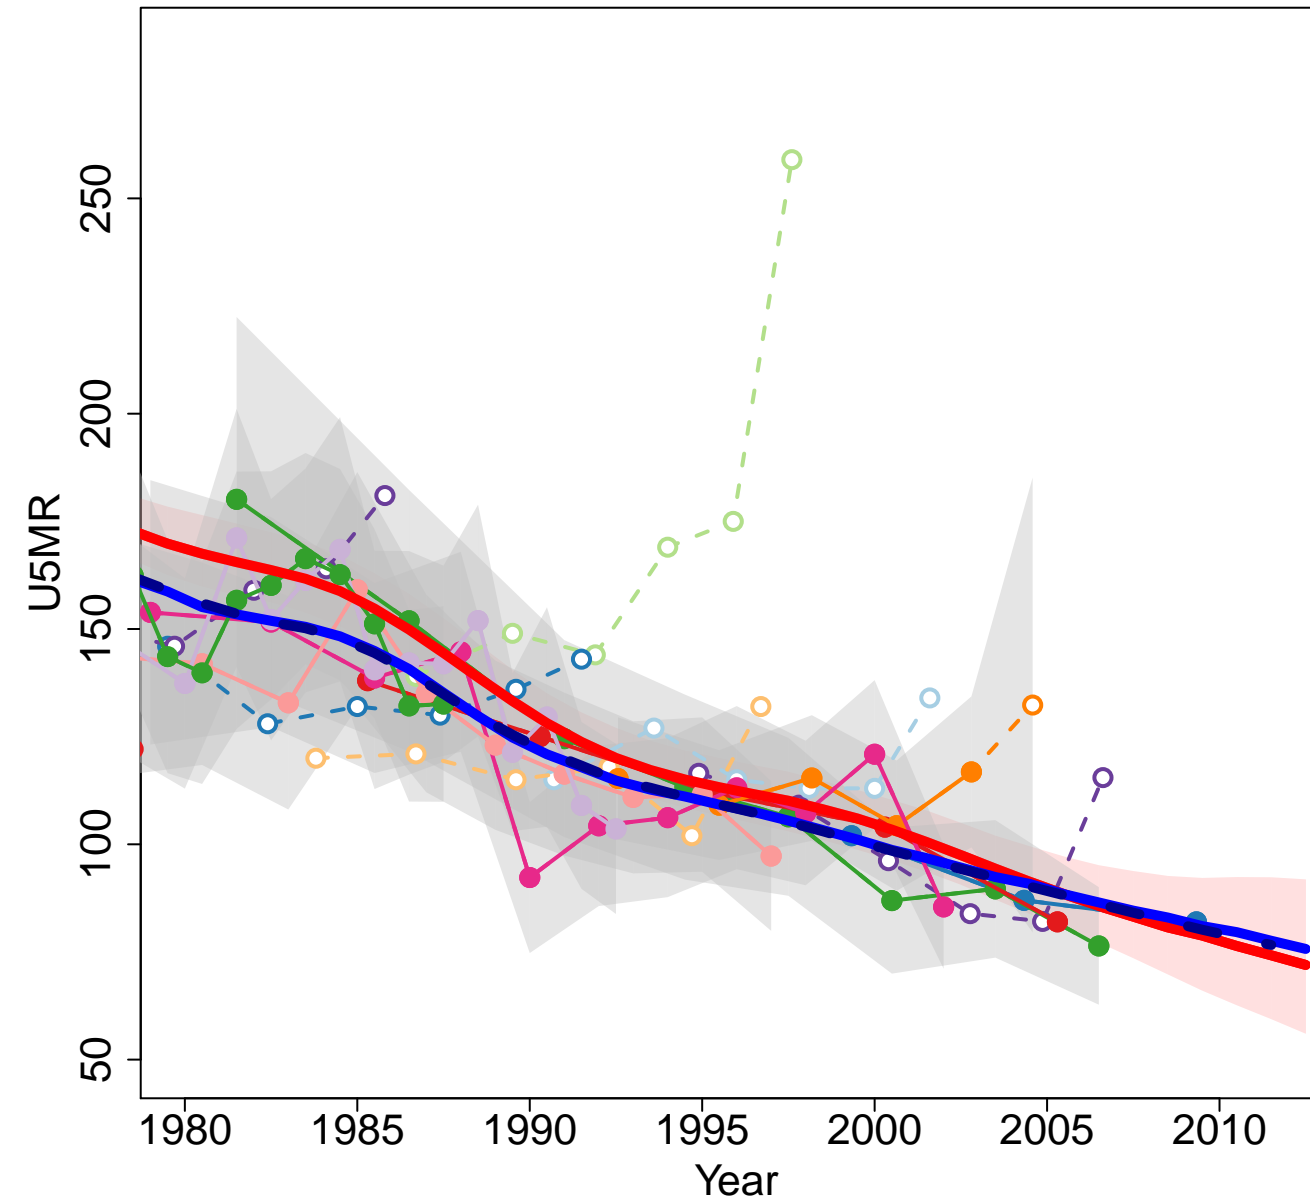

- Census 1948 (Census Indirect)
- Census 1960 (Census Indirect)
- Census 1971 (Census Indirect)
- Ghana Fertility Survey 1979–1980 (Other DHS Indirect)
- World Fertility Survey 1979–1980 (Other DHS Direct)
- Demographic and Health Survey 1988 (DHS Indirect)
- Demographic and Health Survey 1988 (DHS Direct)
- Demographic and Health Survey 1993–1994 (DHS Indirect)
- Demographic and Health Survey 1993–1994 (DHS Direct)
- Demographic and Health Survey 1998–1999 (DHS Indirect)
- Demographic and Health Survey 1998–1999 (DHS Direct)
- Census 2000 (Census Indirect)
- Demographic and Health Survey 2003 (DHS Indirect)
- Demographic and Health Survey 2003 (DHS Direct)
- Multiple Indicator Cluster Survey 2006 (MICS Indirect)
- Maternal Health Survey Final 2007 (Other DHS Direct)
- Demographic and Health Survey 2008 (DHS Indirect)
- Demographic and Health Survey 2008 (DHS Direct)
- Multiple Indicator Cluster Survey 2011 (MICS Direct)
- VR Dual Registration
- VR CCP Registration

# Grenada

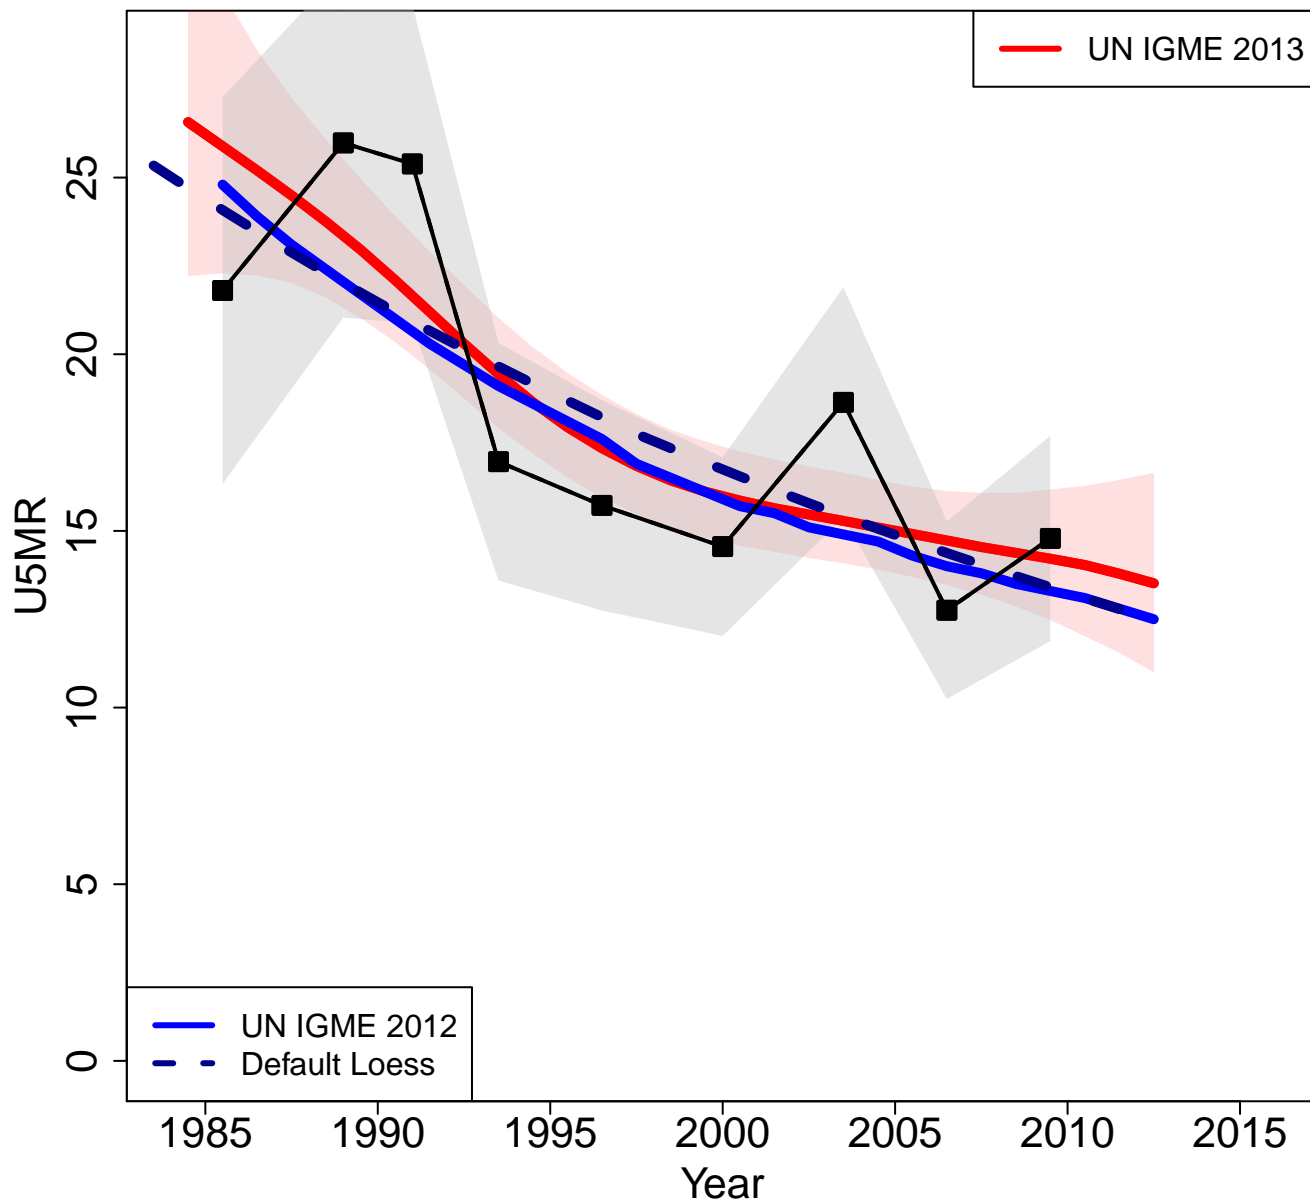

# Zoomed in

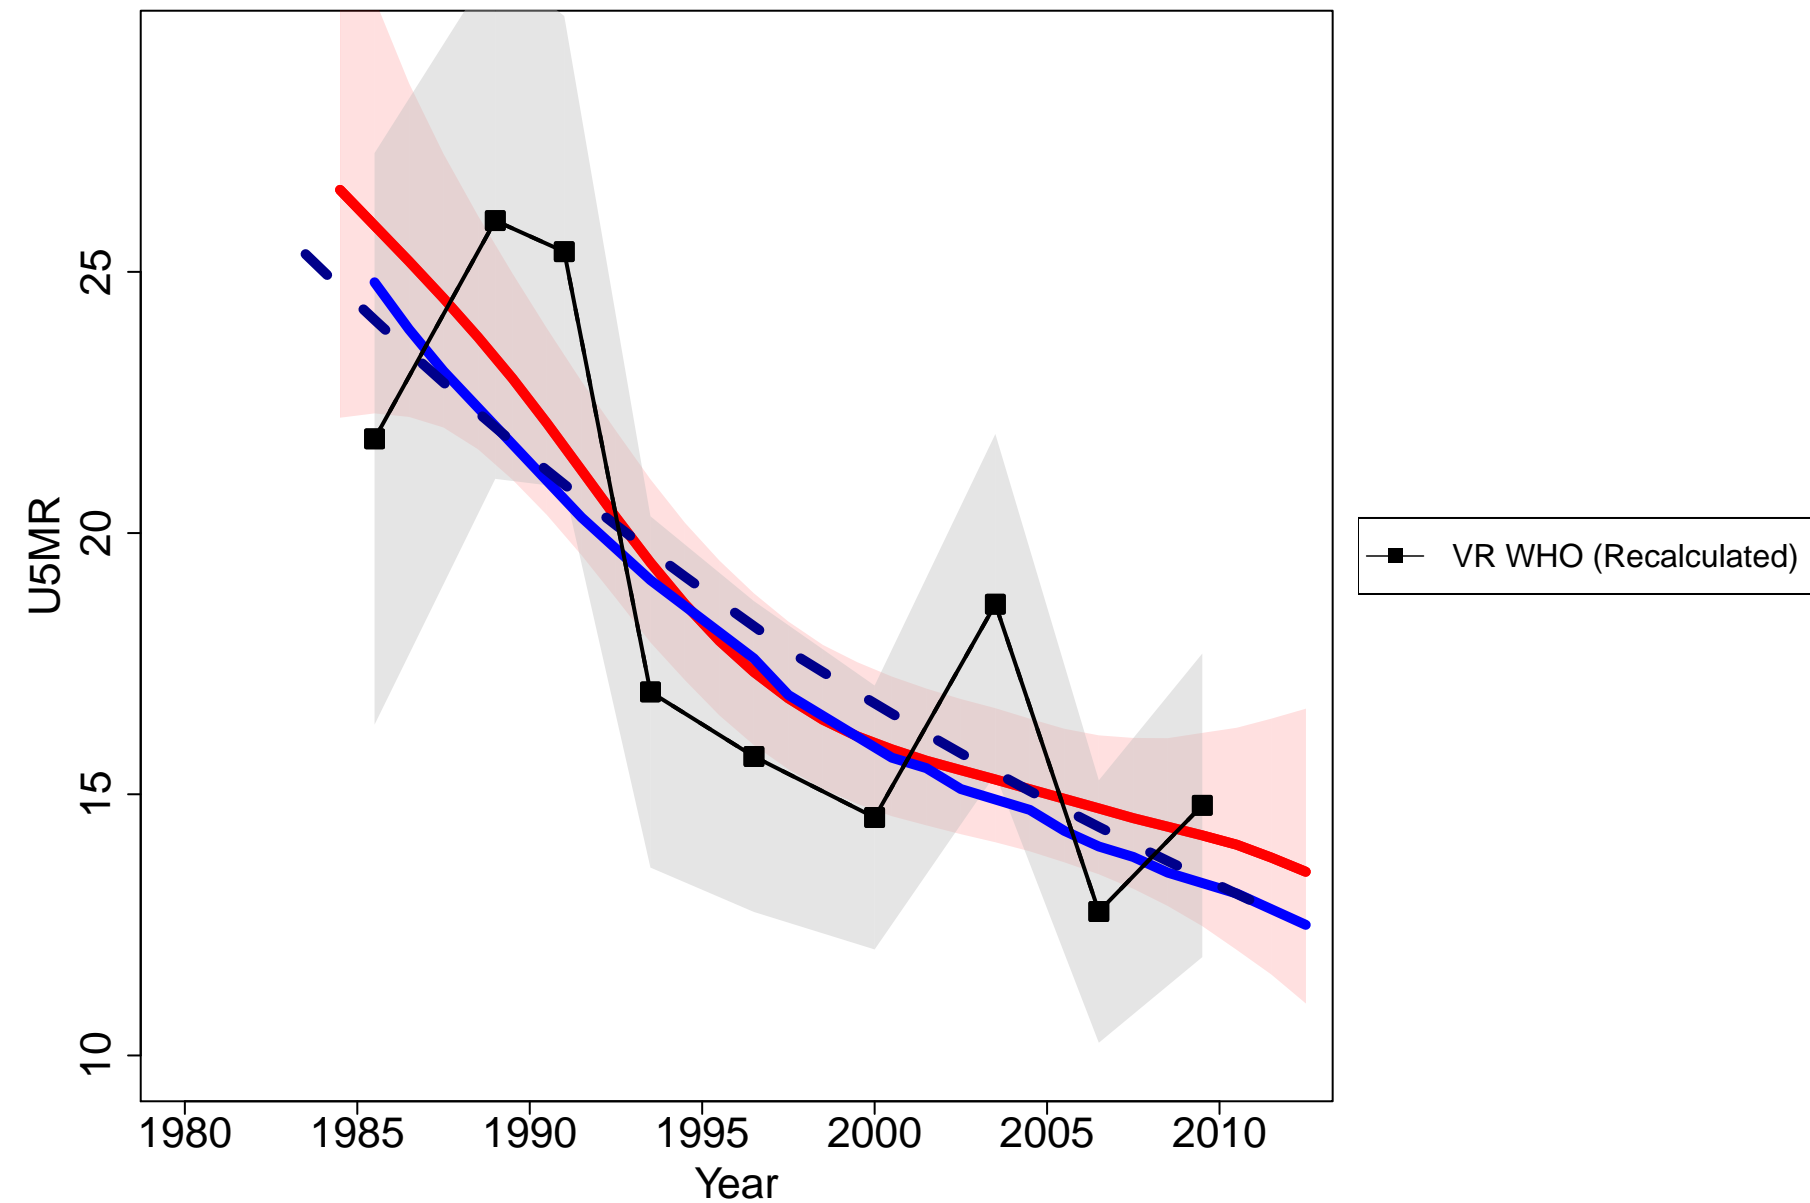

# Guatemala

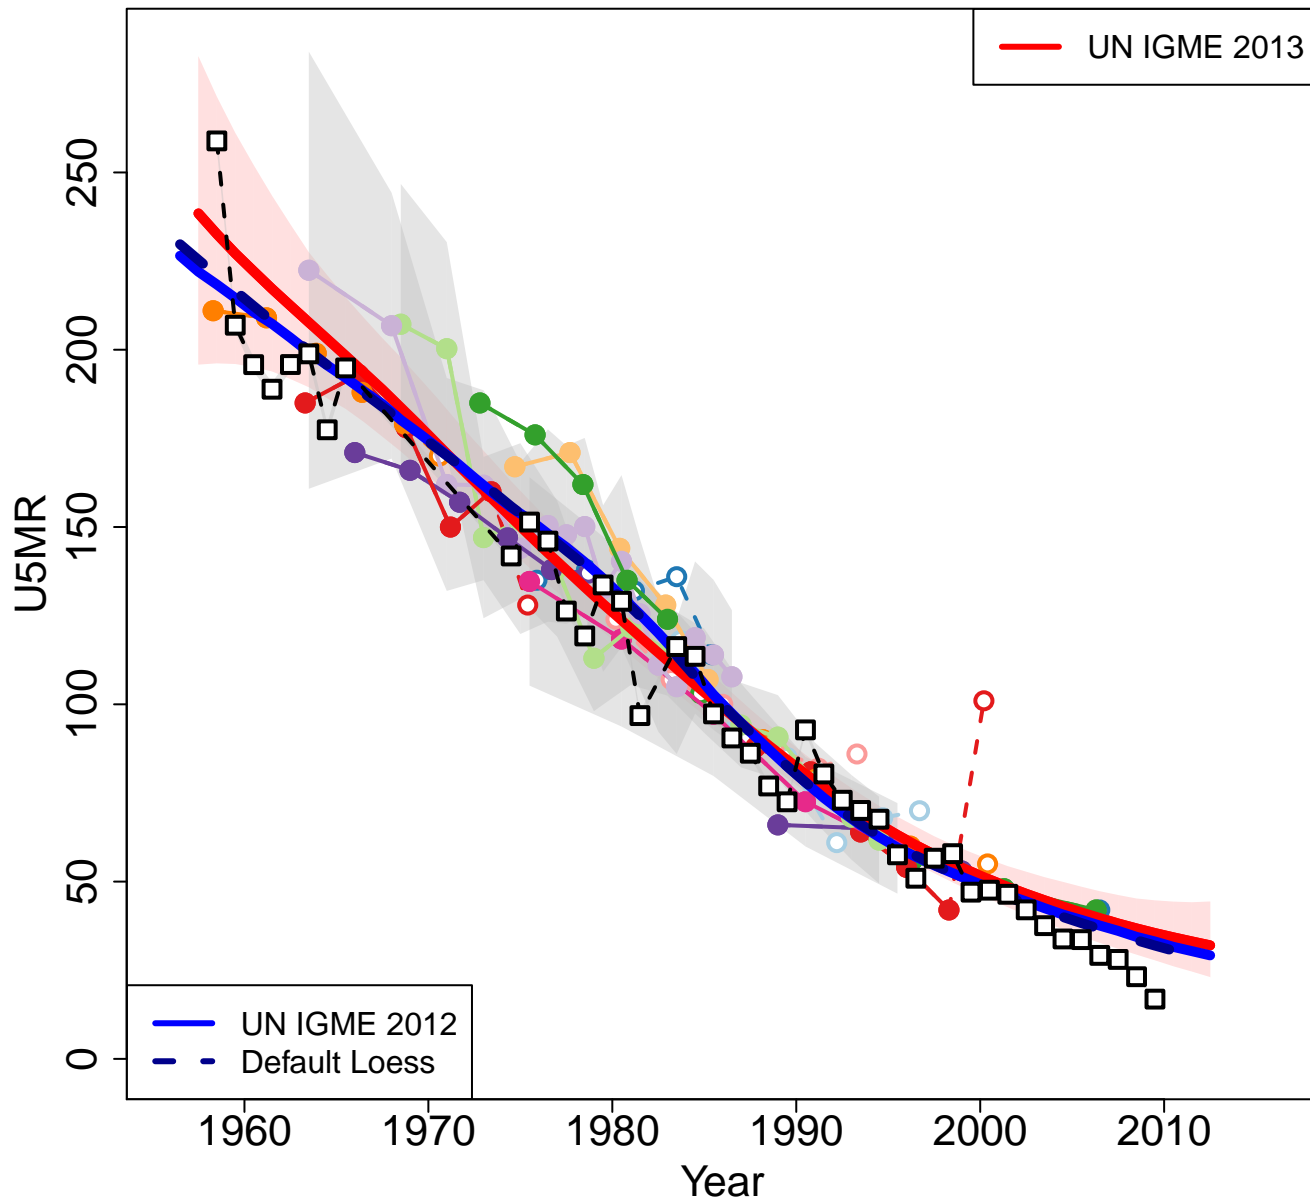

# Zoomed in

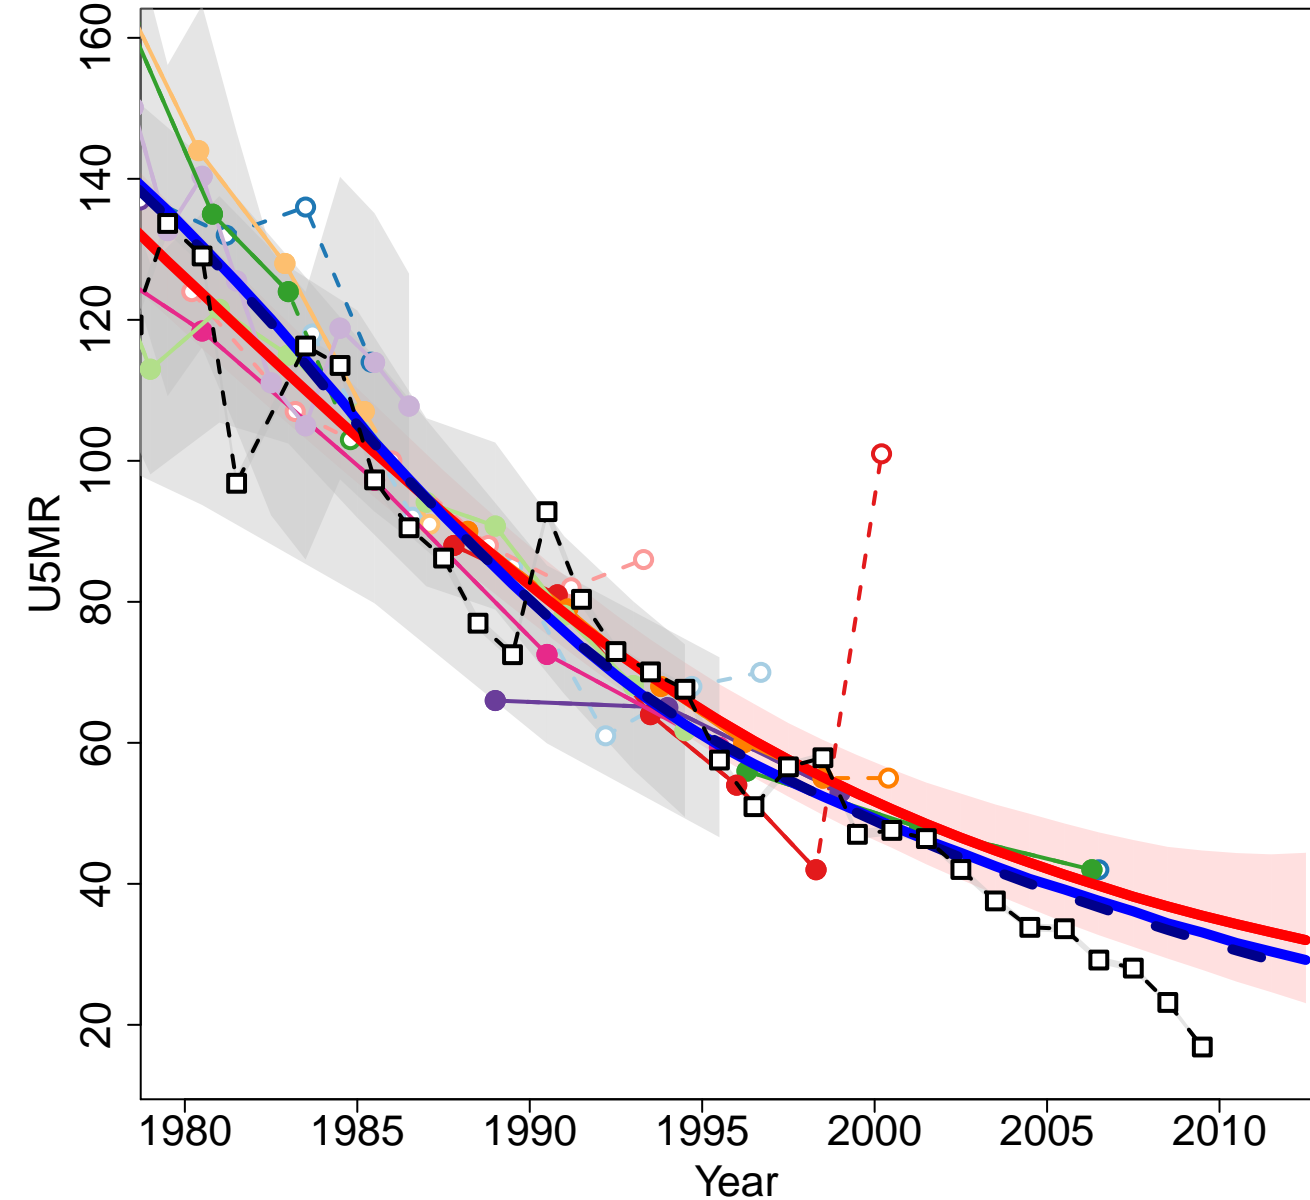

- Censo 1973 (Census Indirect)
- Encuesta Nacional de Fecundidad, Planificacion Familiar y Comunicacion 1978-1979 (Other DHS Indirect)
- Censo 1981 (Census Indirect)
- Enc. Nacional SocioDemografica 1987 (Others Indirect)
- Demographic and Health Survey 1987 (DHS Indirect)
- Demographic and Health Survey 1987 (DHS Direct)
- Enc. Nacional Sociodemografica 1989 (Others Indirect)
- Demographic and Health Survey 1995 (DHS Indirect)
- Demographic and Health Survey 1995 (DHS Direct)
- Demographic and Health Survey 1998-1999 (Other DHS Indirect)
- Demographic and Health Survey 1998-1999 (Other DHS Direct)
- Censo 2002 (Census Indirect)
- Demographic and Health Survey 2002 (Other DHS Indirect)
- RHS-CDC 2002 (Others Direct)
- Encuesta Nacional de Salud Materno Infantil (ENSMI) Final 2008-2009 (Others Direct)
- Encuesta Nacional de Salud Materno Infantil (ENSMI) (Preliminary) 2008-2009 (Other DHS Indirect)
- VR WHO

# Guinea

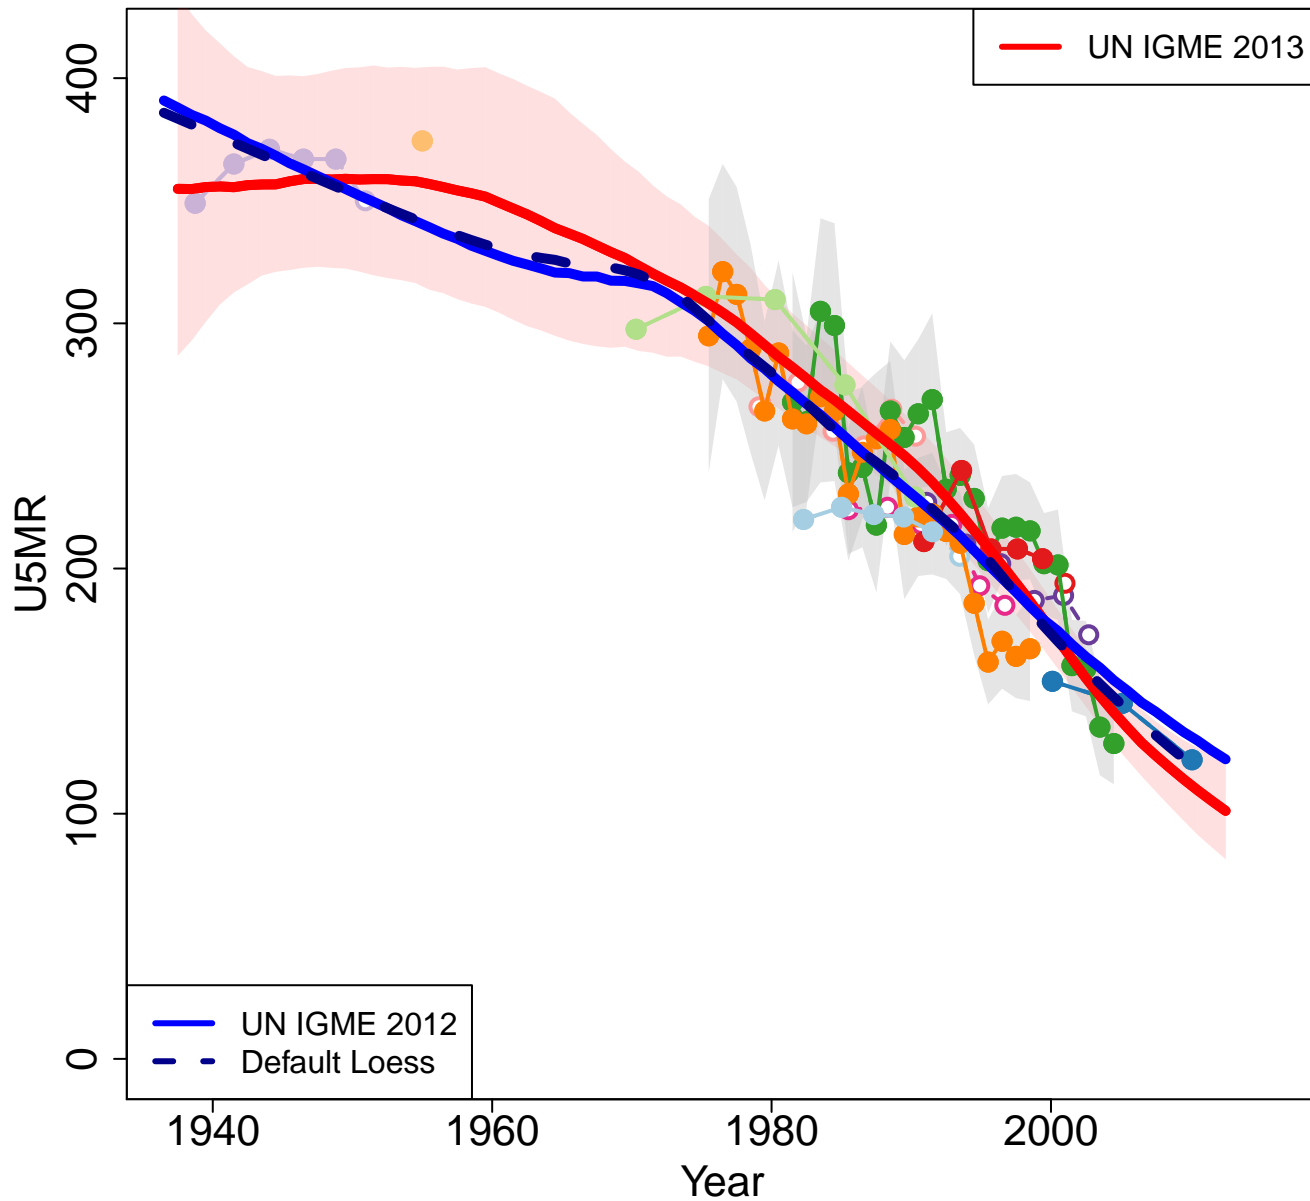

# Zoomed in

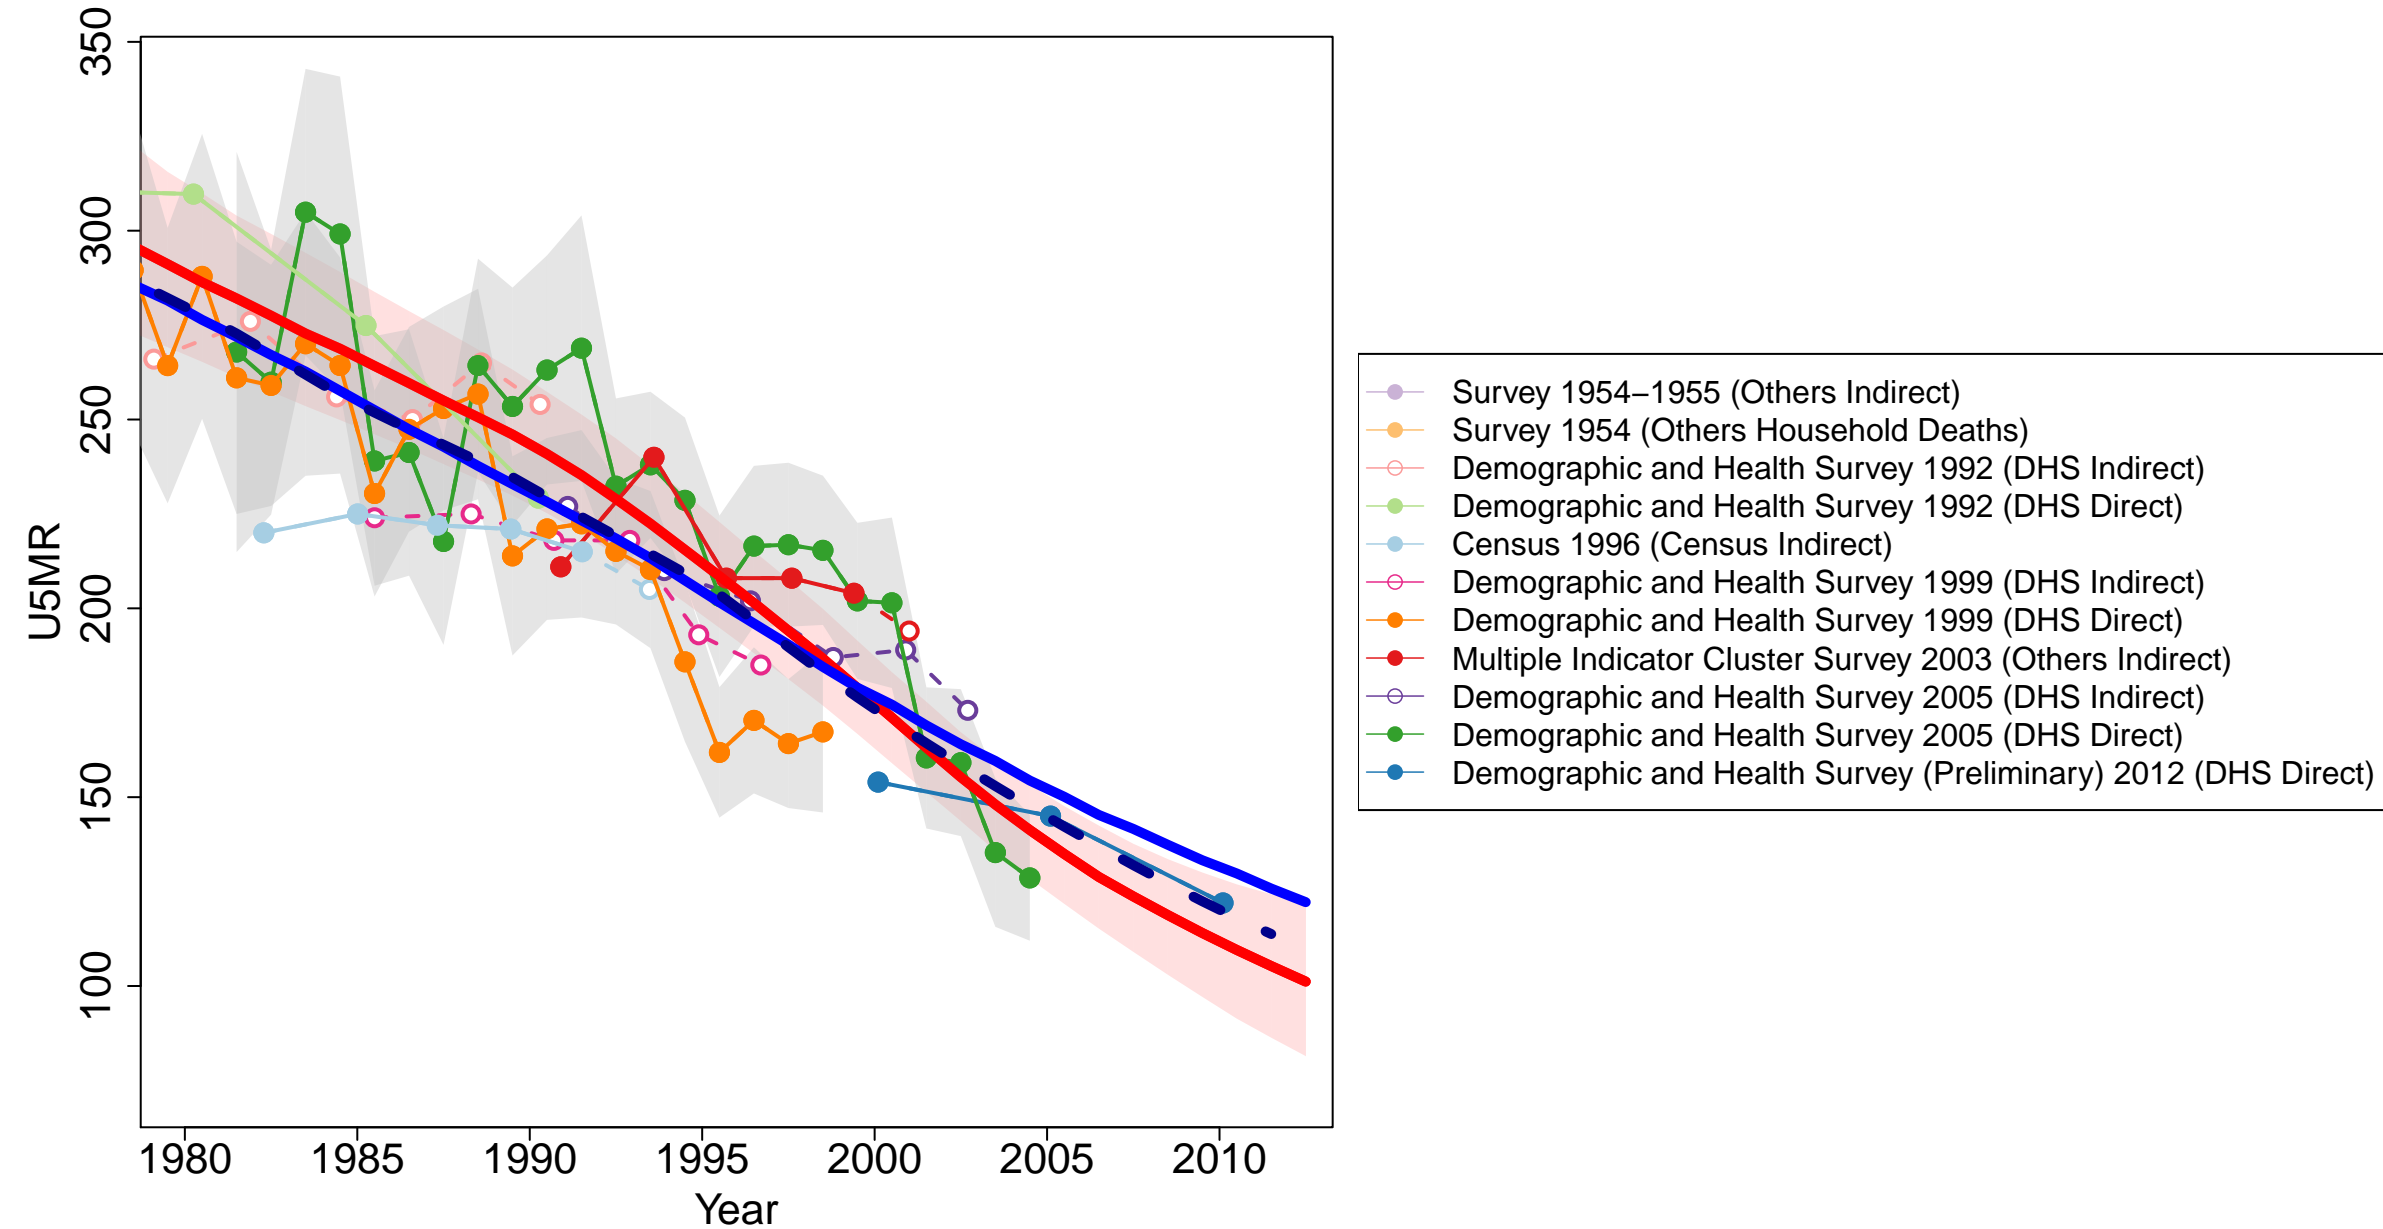



# Guinea-Bissau

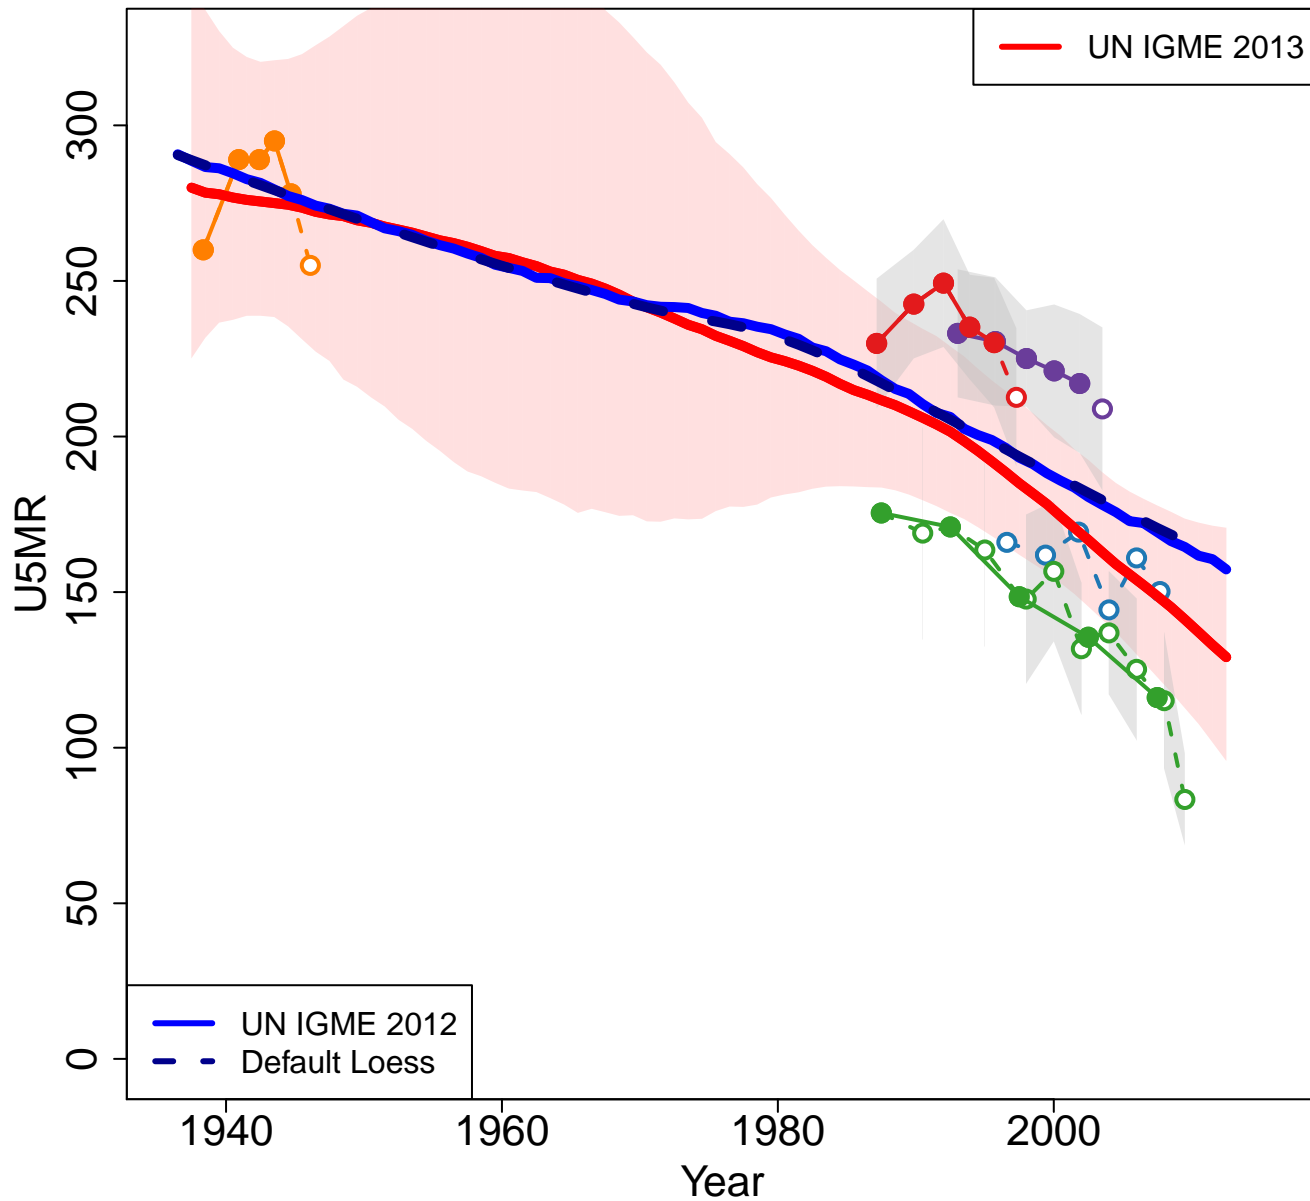

# Zoomed in

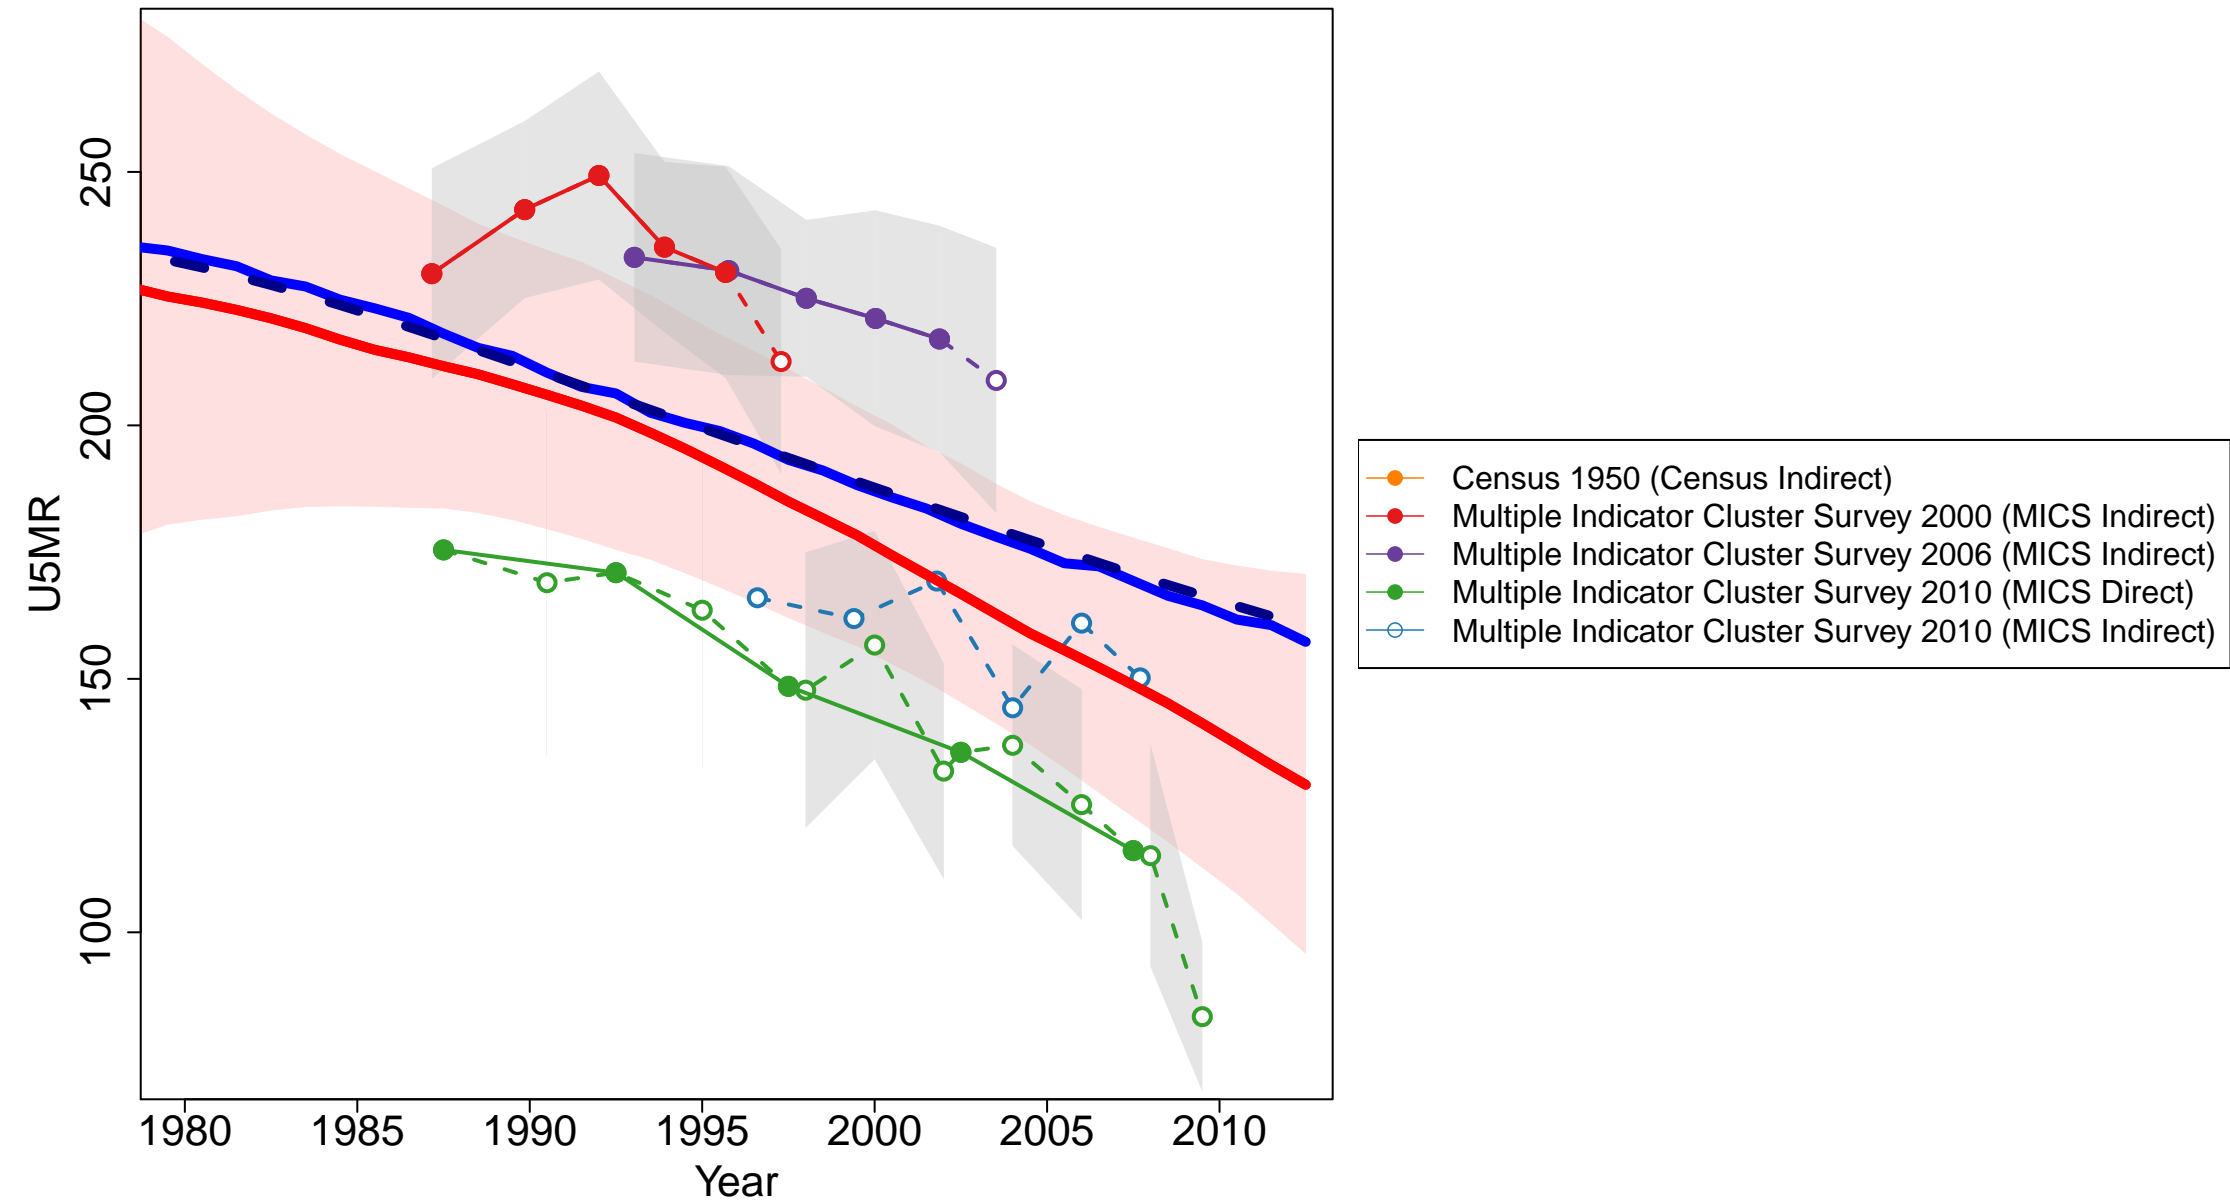

# Guyana

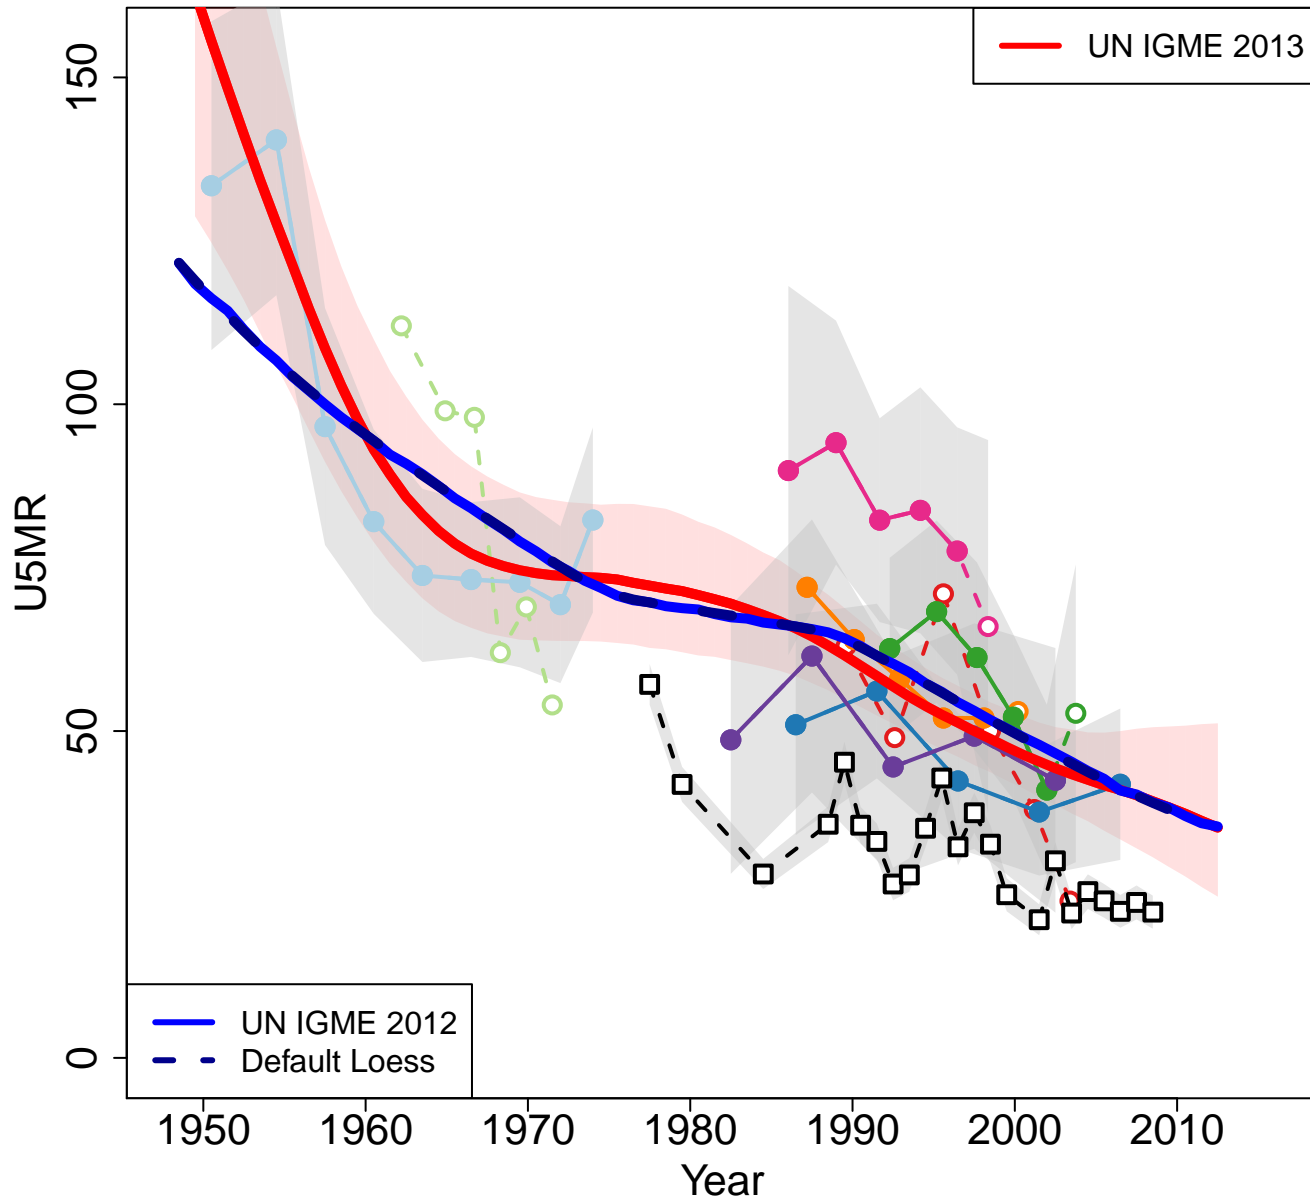

# Zoomed in

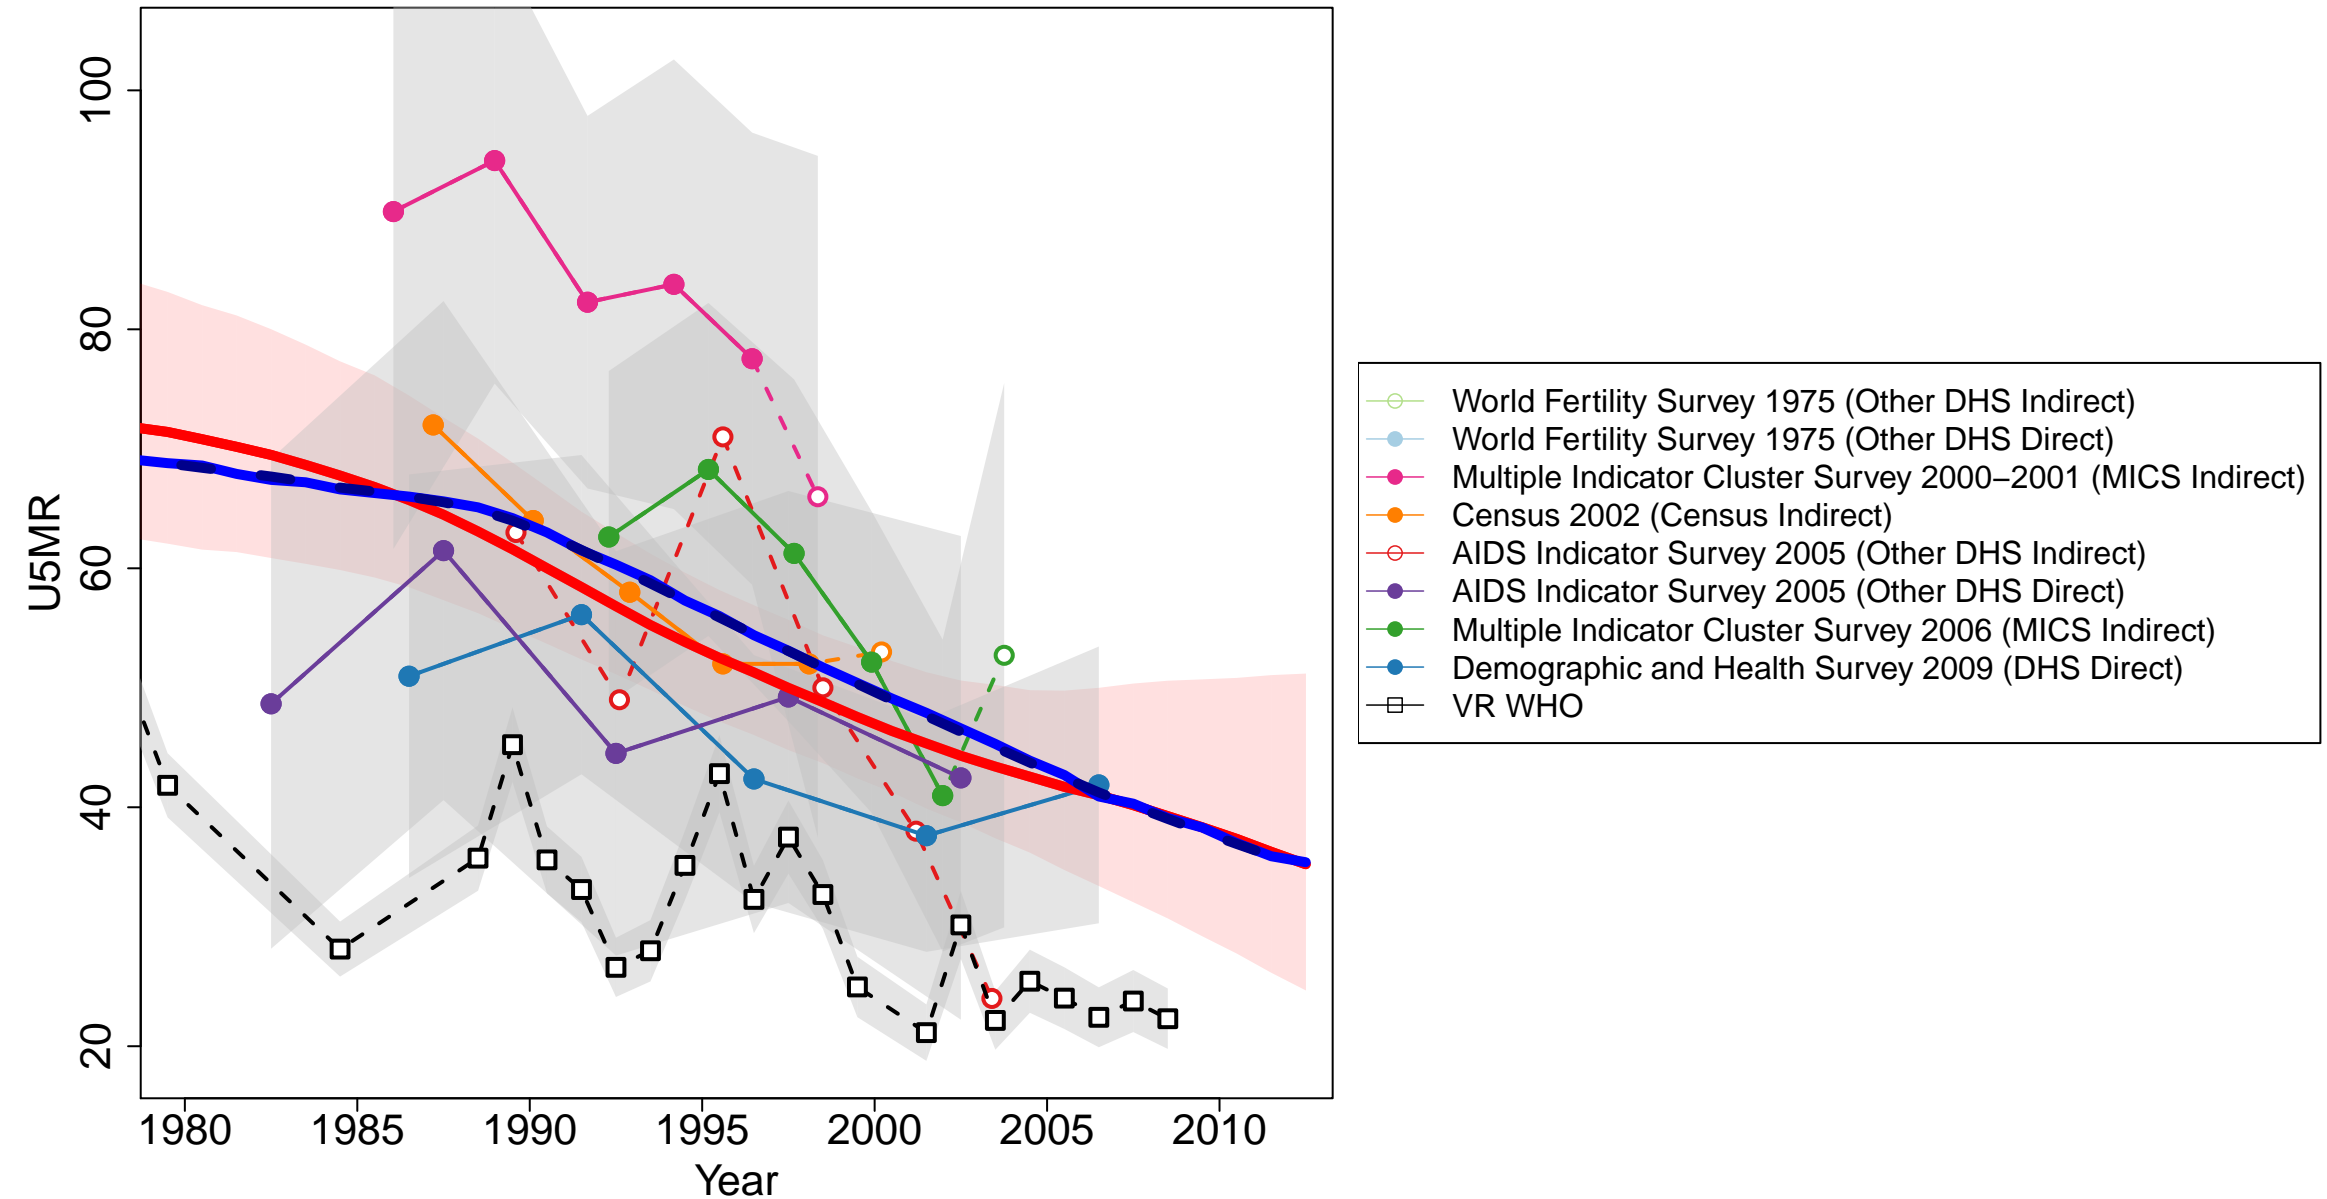

# Haiti

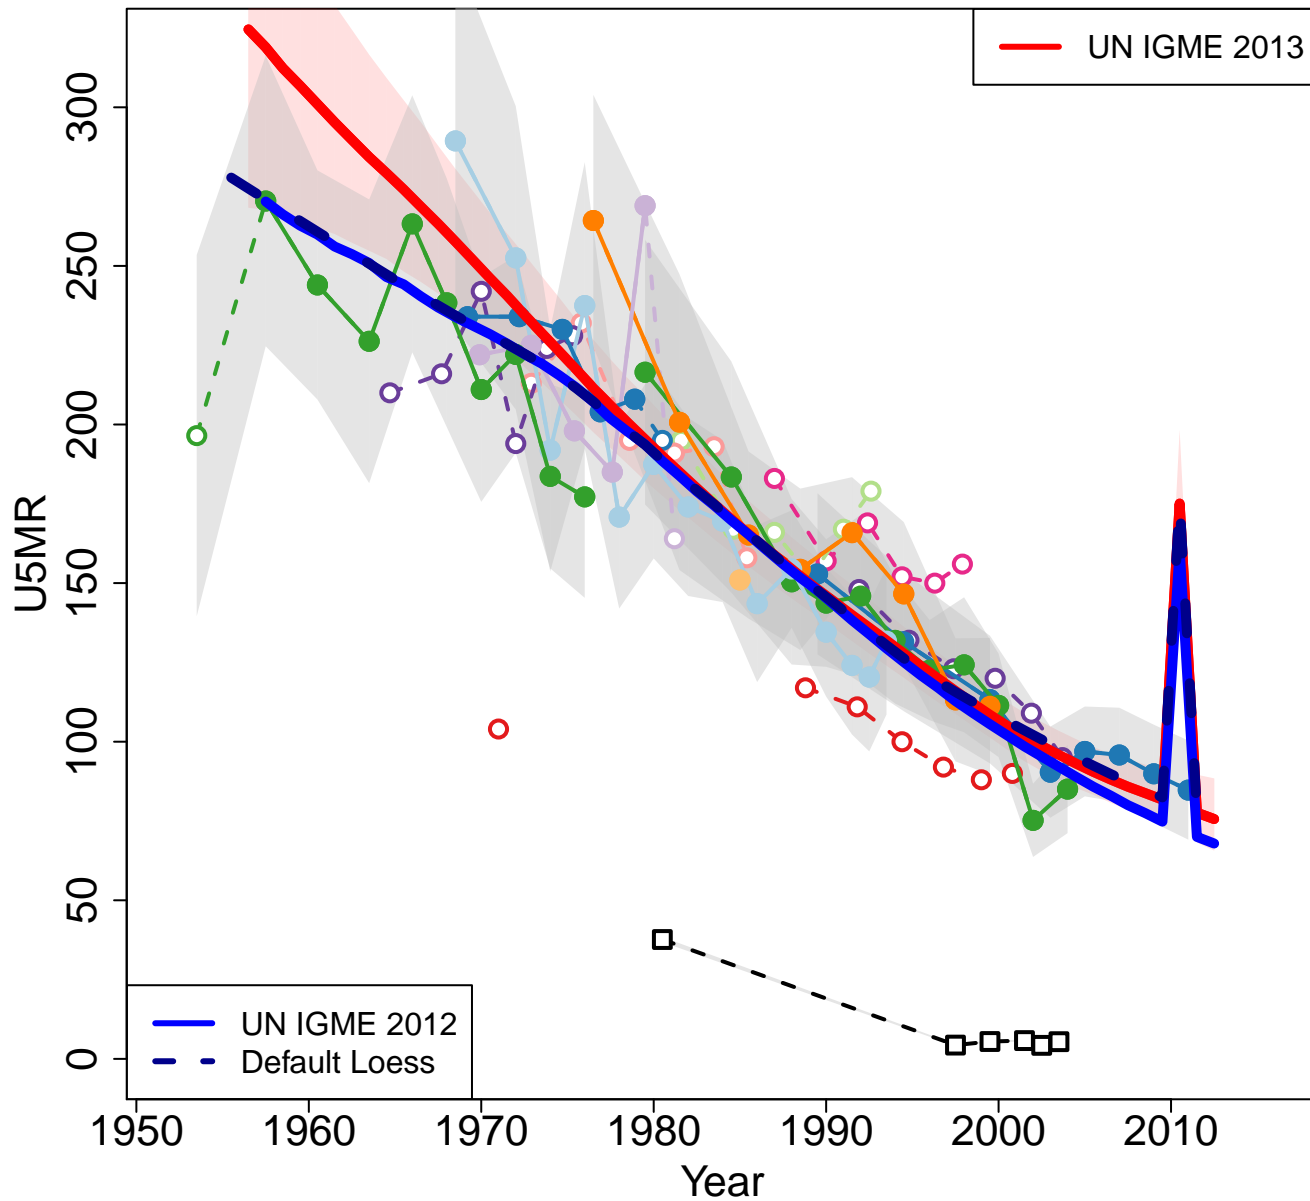

# Zoomed in

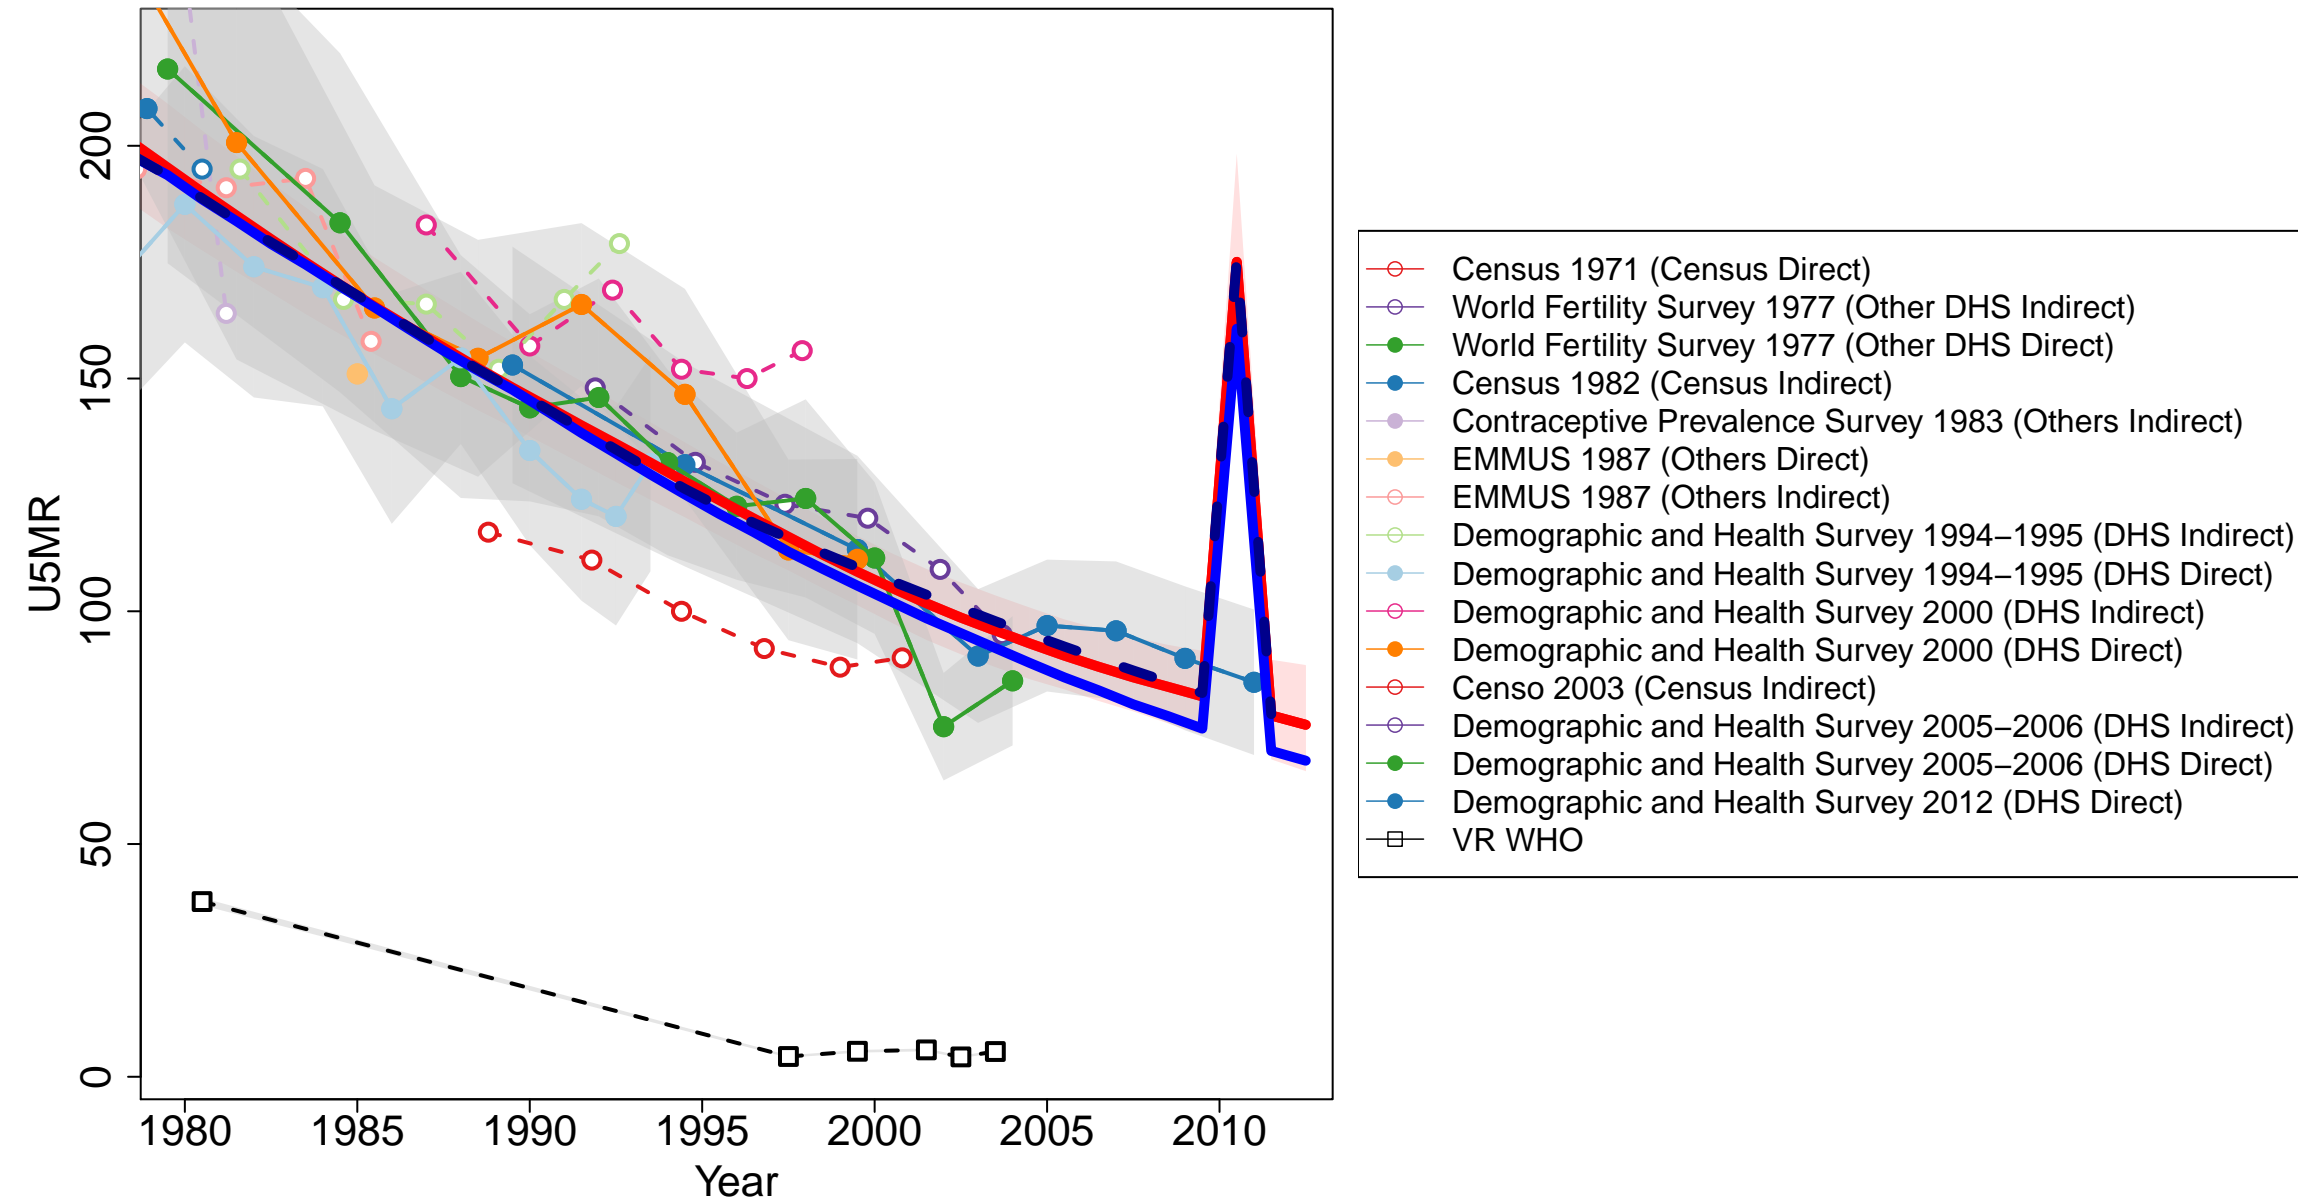

# Honduras

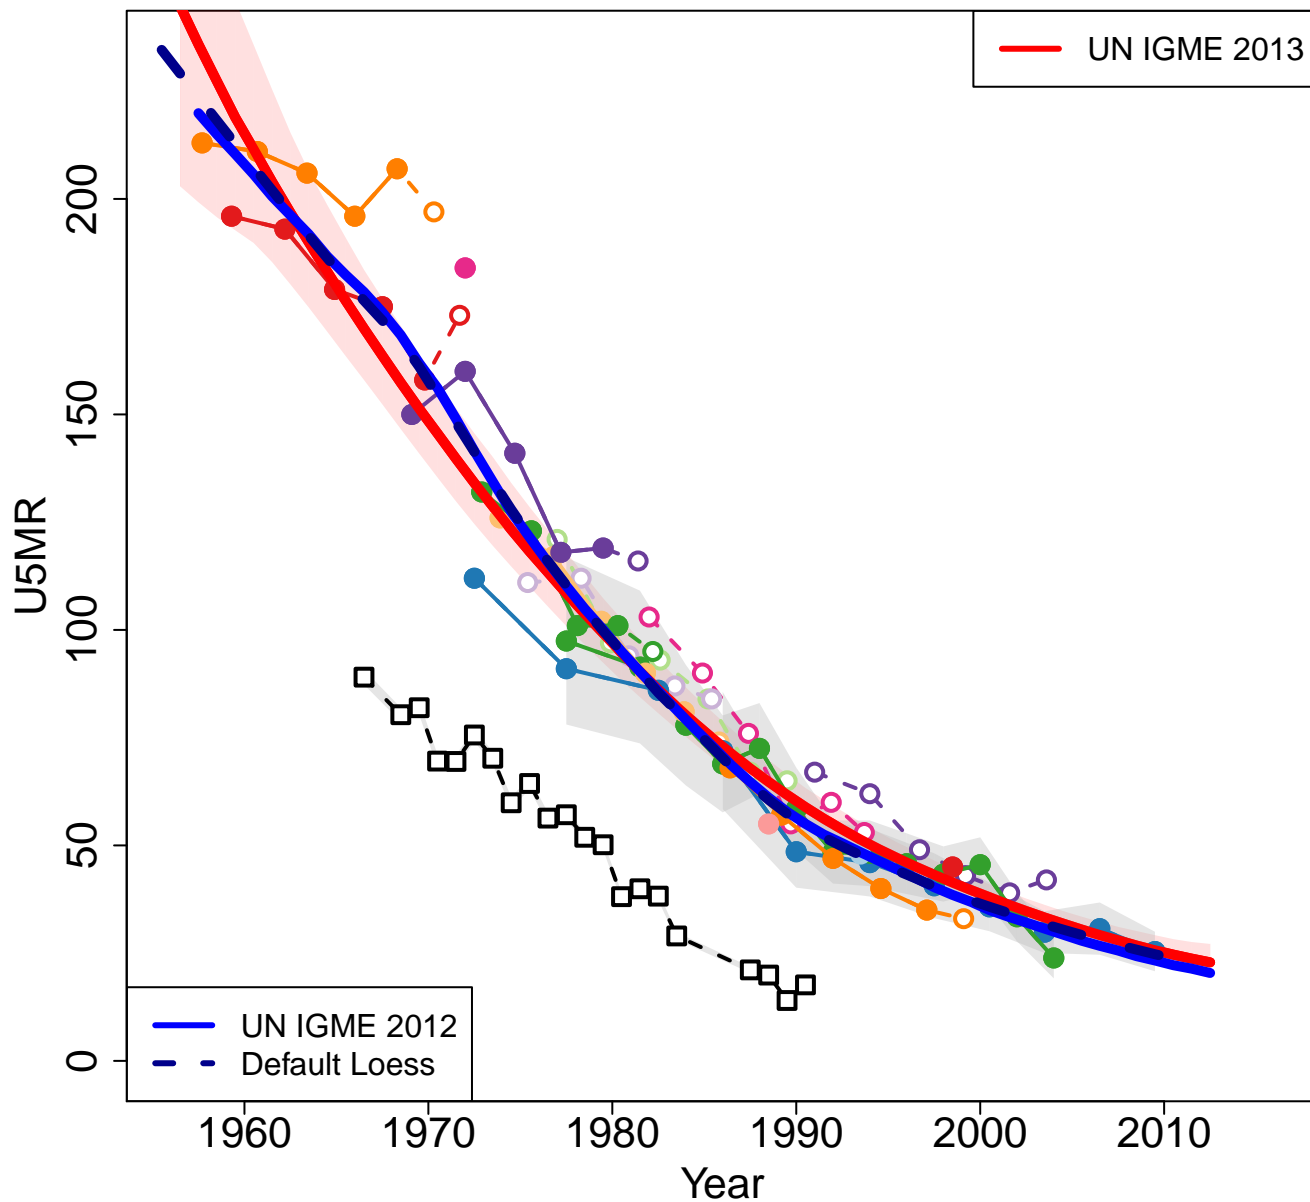

# Zoomed in

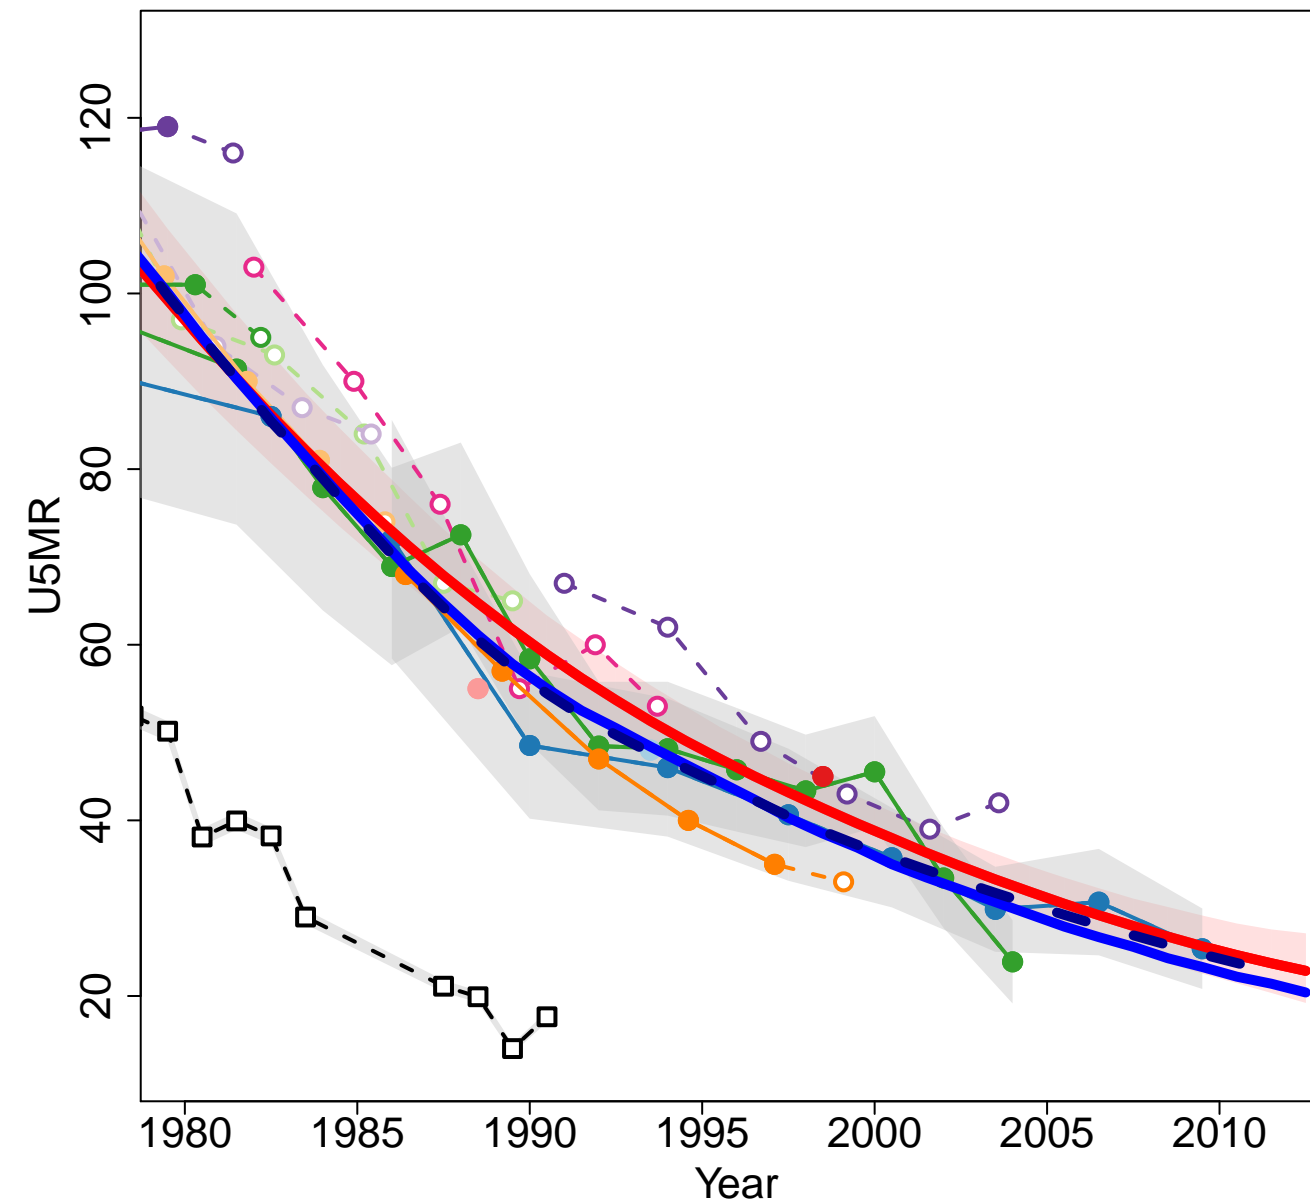

- National Demographic Survey 1972 (Others Direct)
- National Demographic Survey 1972 (Others Indirect)
- Census 1974 (Census Indirect)
- National Demographic Survey 1983 (Others Indirect)
- National Survey of Maternal and Child Health 1984 (Others Indirect)
- Encuesta Nacional de Epidemiología y Salud Familiar (ENESF) 1987 (Others Direct)
- Encuesta Nacional de Epidemiología y Salud Familiar (ENESF) 1987 (Others Indirect)
- Census 1988 (Census Indirect)
- Encuesta Nacional de Epidemiología y Salud Familiar (ENESF) 1991–1992 (Others Direct)
- Encuesta Nacional de Epidemiología y Salud Familiar (ENESF) 1991–1992 (Others Indirect)
- Encuesta Nacional de Epidemiología y Salud Familiar (ENESF) 1996 (Others Direct)
- Encuesta Nacional de Epidemiología y Salud Familiar (ENESF) 1996 (Others Indirect)
- Censo 2001 (Census Indirect)
- Encuesta Nacional de Epidemiología y Salud Familiar (ENESF) 2001 (Others Direct)
- Demographic and Health Survey 2005–2006 (DHS Indirect)
- Demographic and Health Survey 2005–2006 (DHS Direct)
- Demographic and Health Survey 2011–2012 (DHS Direct)
- VR WHO

# India

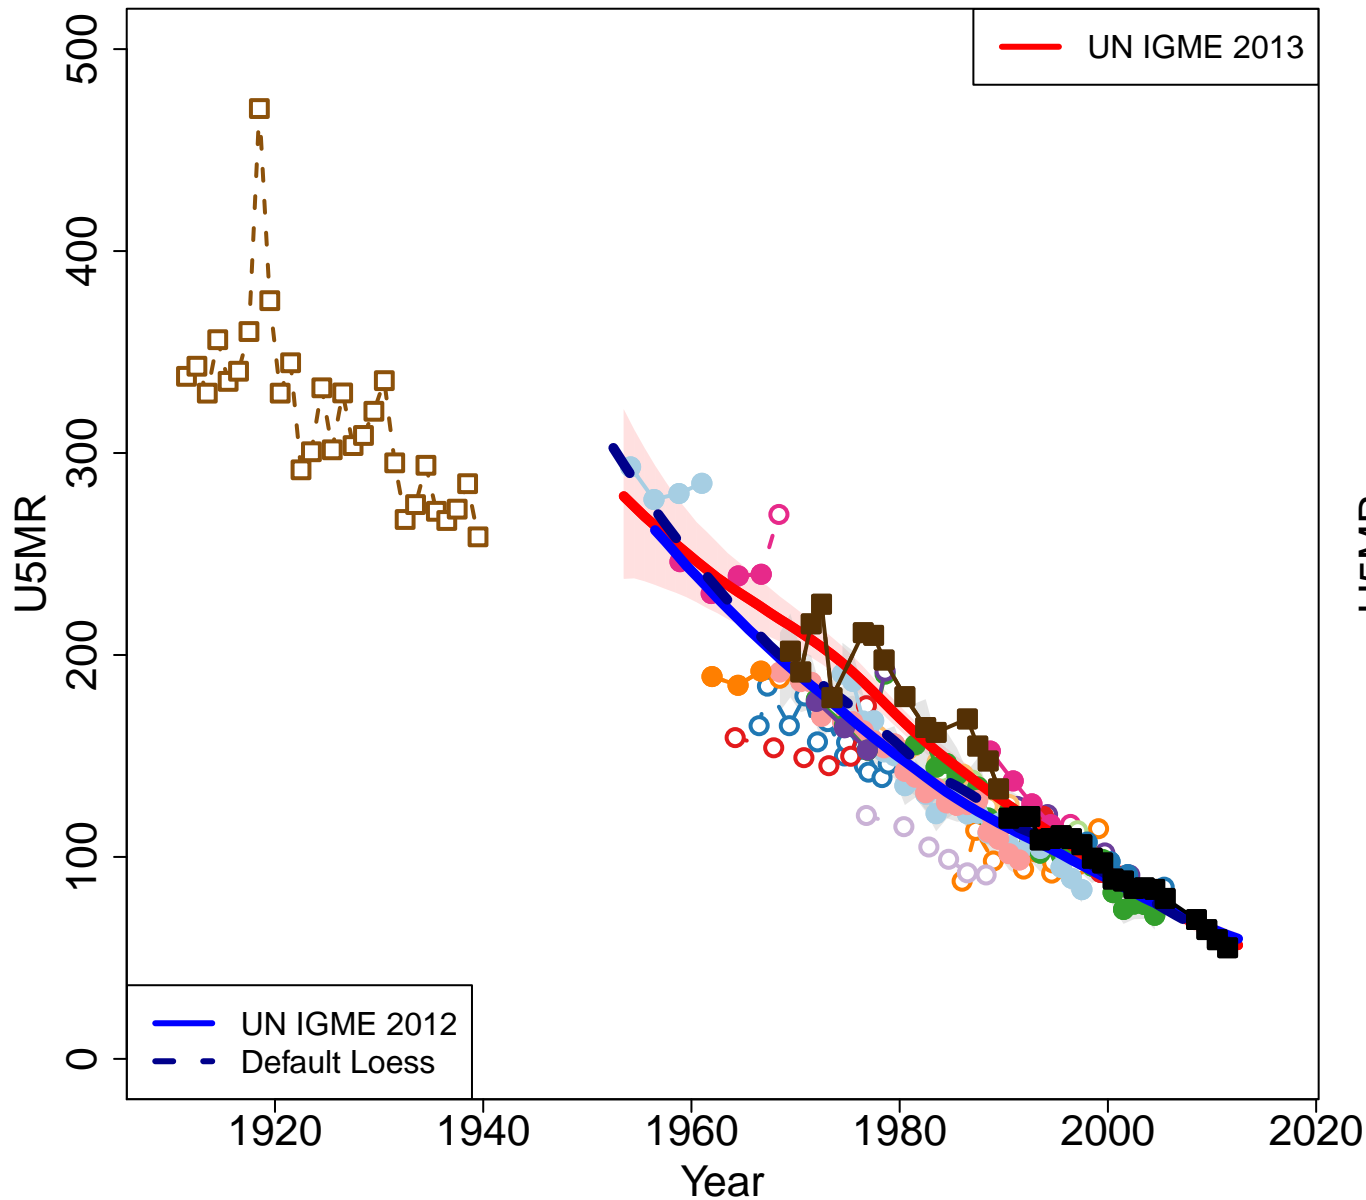

# Zoomed in

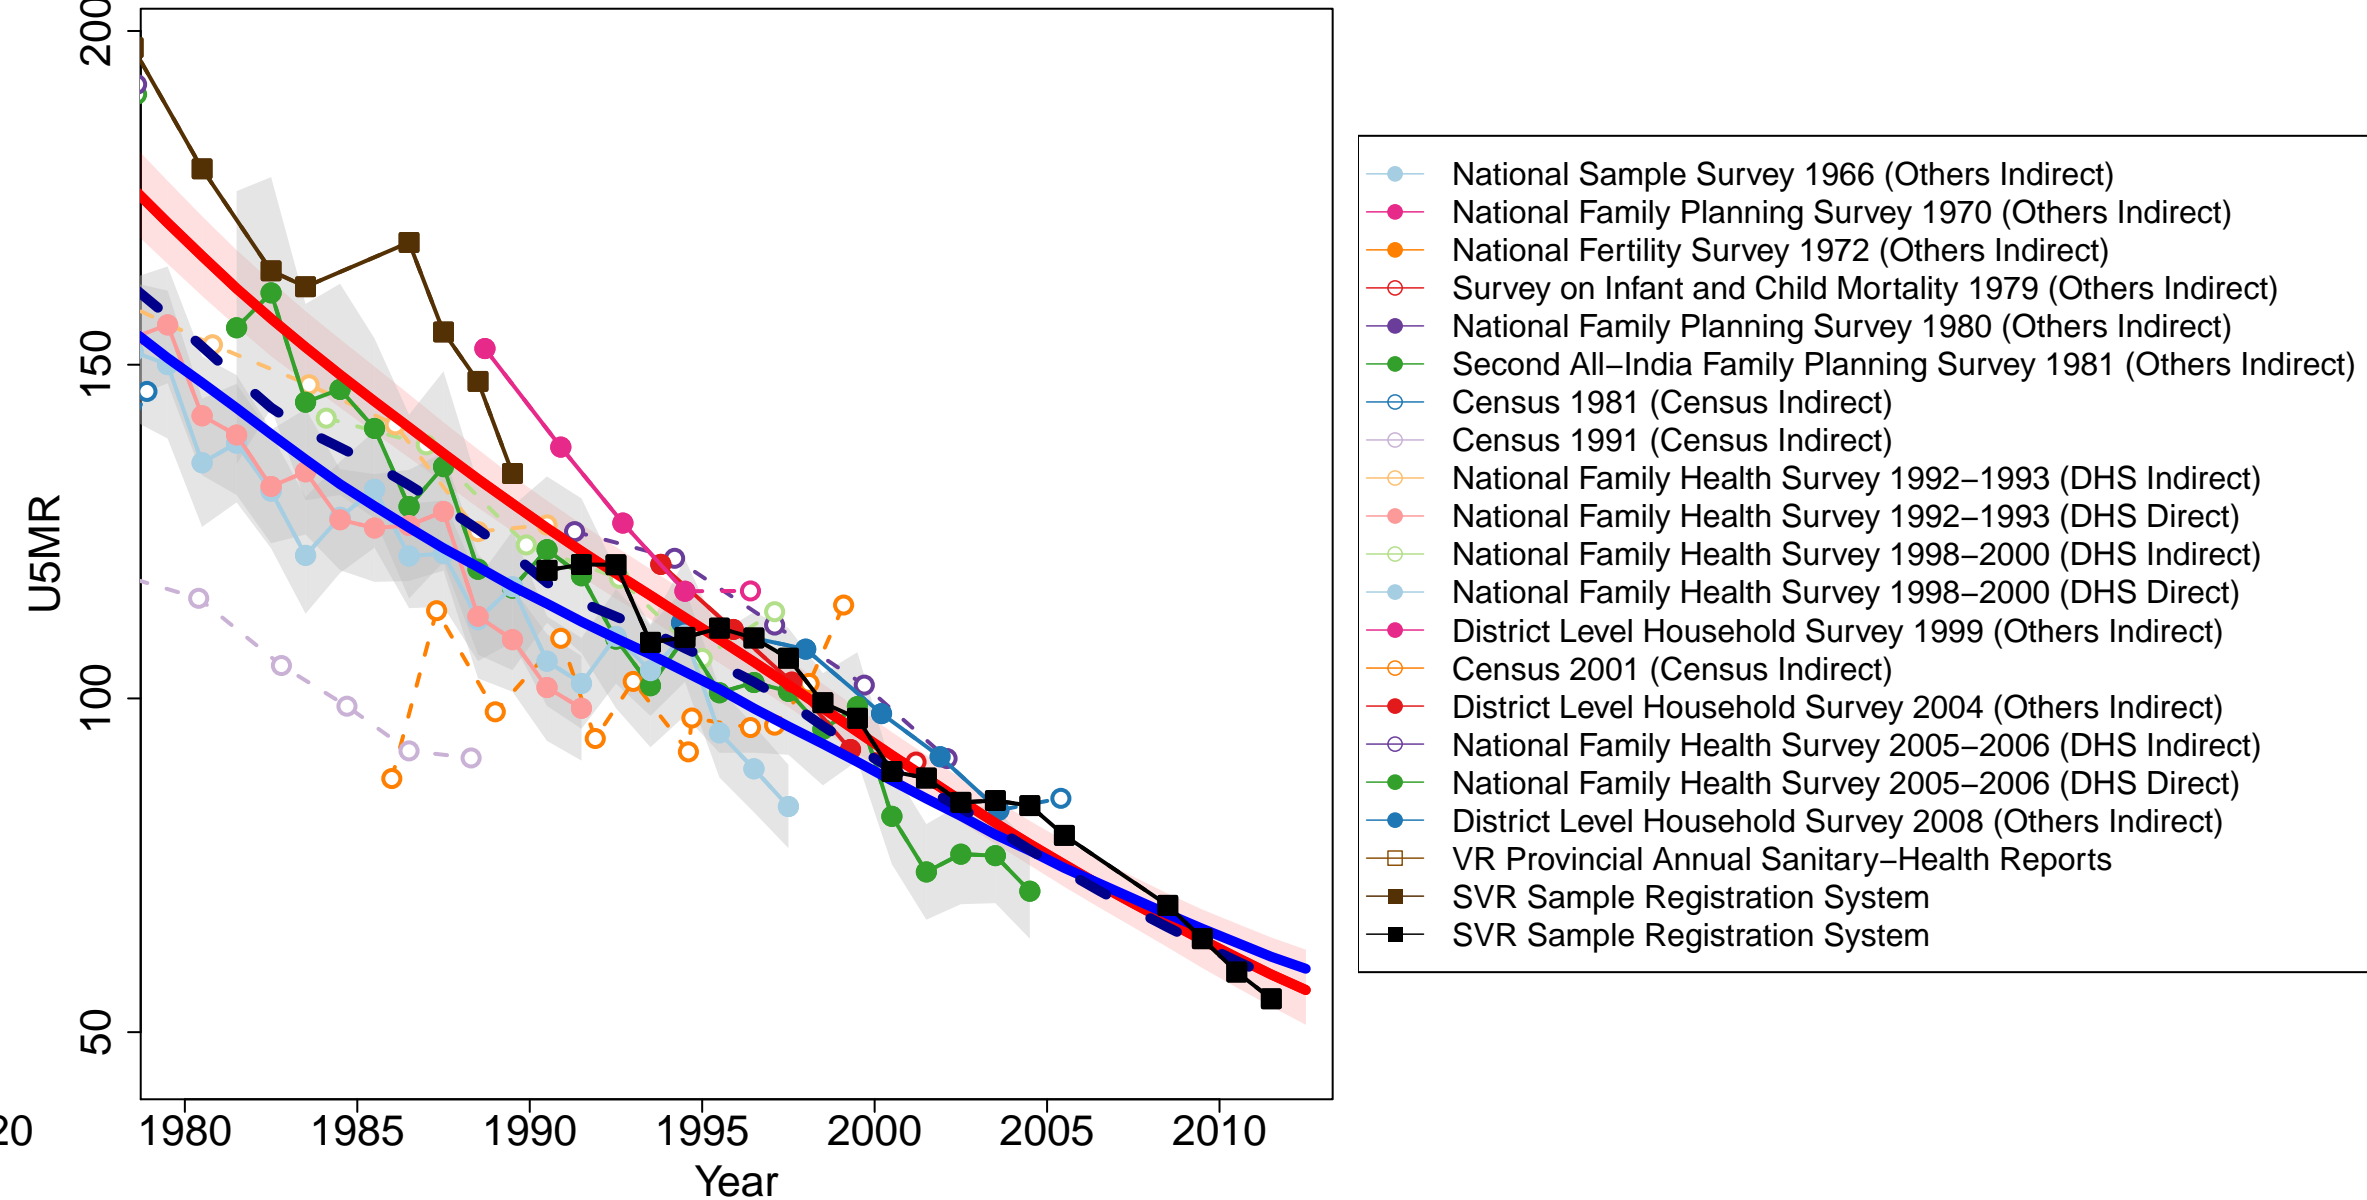

# Indonesia

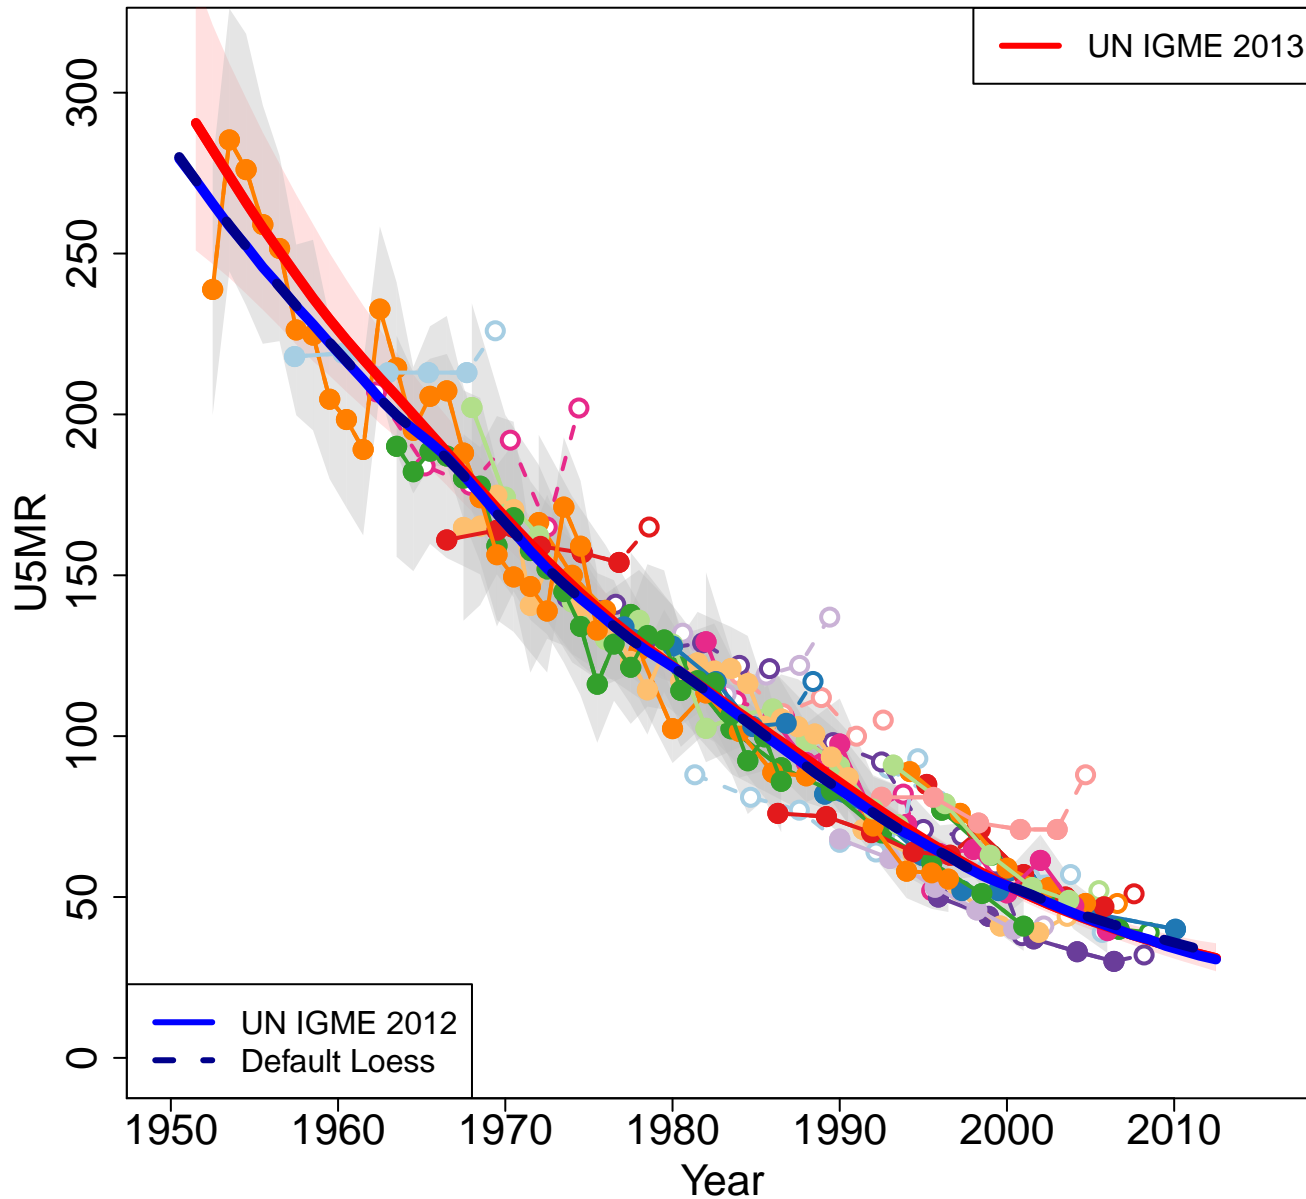

# Zoomed in

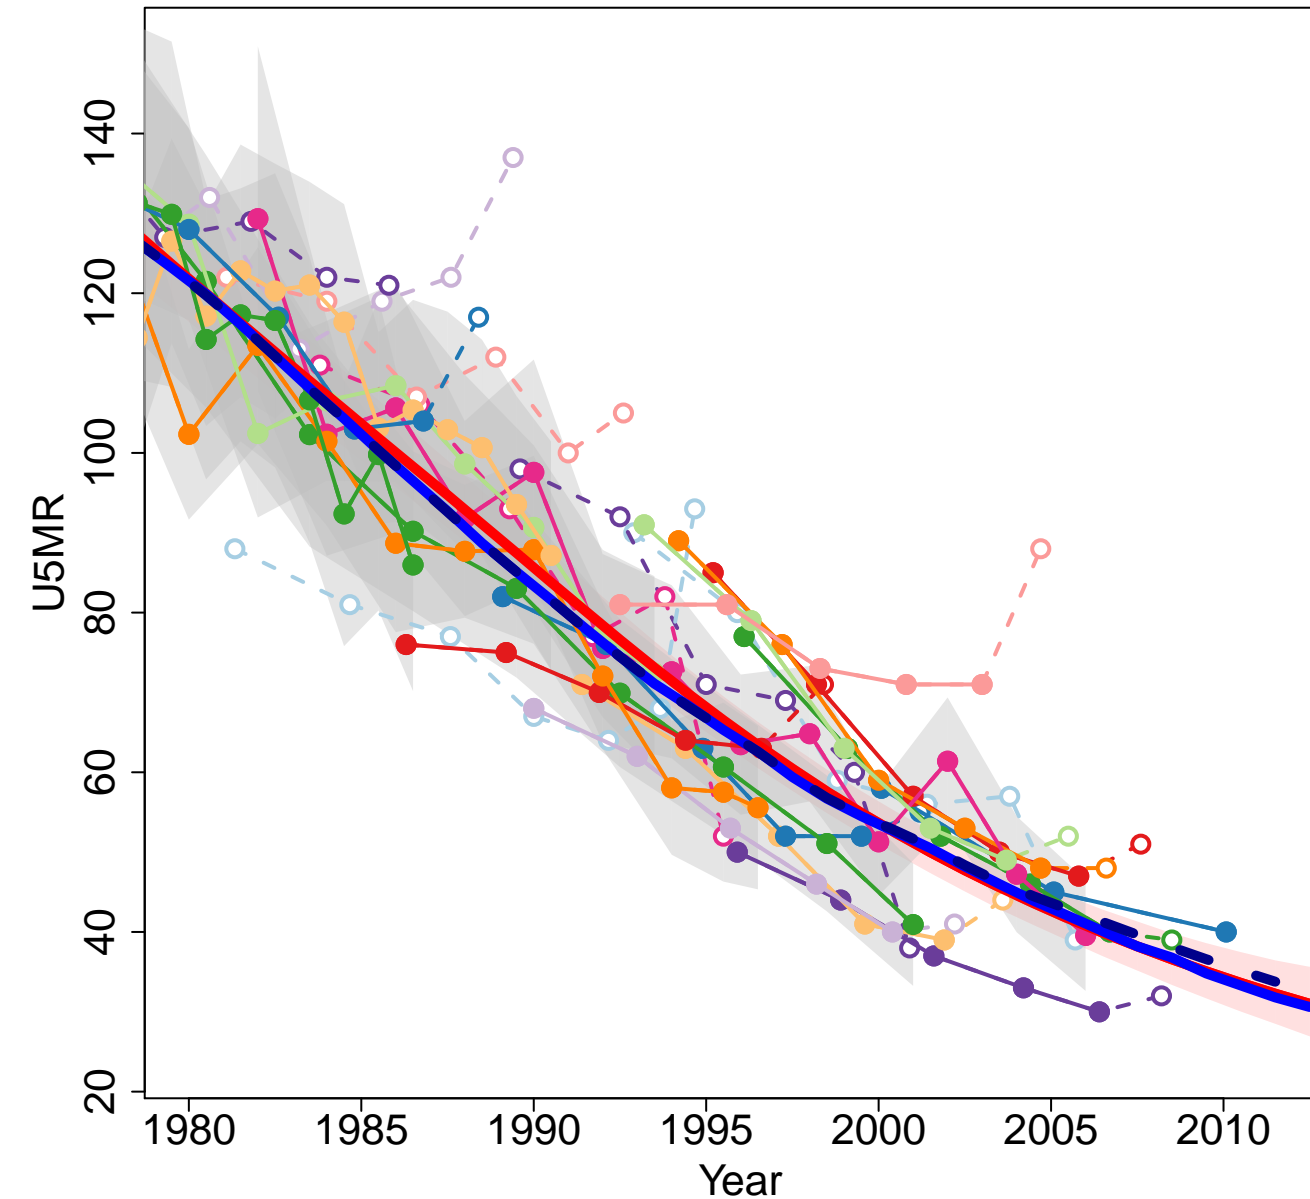

- Census 1971 (Census Indirect)
- World Fertility Survey 1976 (Other DHS Indirect)
- World Fertility Survey 1976 (Other DHS Direct)
- Census 1980 (Census Indirect)
- Demographic and Health Survey 1987 (DHS Indirect)
- Demographic and Health Survey 1987 (DHS Direct)
- Census 1990 (Census Indirect)
- Demographic and Health Survey 1991 (DHS Indirect)
- Demographic and Health Survey 1991 (DHS Direct)
- Demographic and Health Survey 1994 (DHS Indirect)
- Demographic and Health Survey 1994 (DHS Direct)
- Intercensal Survey 1995 (Others Indirect)
- Demographic and Health Survey 1997 (DHS Indirect)
- Demographic and Health Survey 1997 (DHS Direct)
- Census 2000 (Census Indirect)
- Demographic and Health Survey 2002–2003 (DHS Indirect)
- Demographic and Health Survey 2002–2003 (DHS Direct)
- National Socio–Economic Survey (SUSENAS) 2003 (Others Indirect)
- National Socio–Economic Survey (SUSENAS) 2004 (Others Indirect)
- National Socio–Economic Survey (SUSENAS) 2005 (Others Indirect)
- National Socio–Economic Survey (SUSENAS) 2006 (Others Indirect)
- National Socio–Economic Survey (SUSENAS) 2007 (Others Indirect)
- Demographic and Health Survey 2007 (DHS Indirect)
- Demographic and Health Survey 2007 (DHS Direct)
- National Socio–Economic Survey (SUSENAS) 2008 (Others Indirect)
- National Socio–Economic Survey (SUSENAS) 2009 (Others Indirect)
- Census 2010 (Census Indirect)
- National Socio–Economic Survey (SUSENAS) 2010 (Others Indirect)
- Demographic and Health Survey (Preliminary) 2012 (DHS Direct)



# Iran

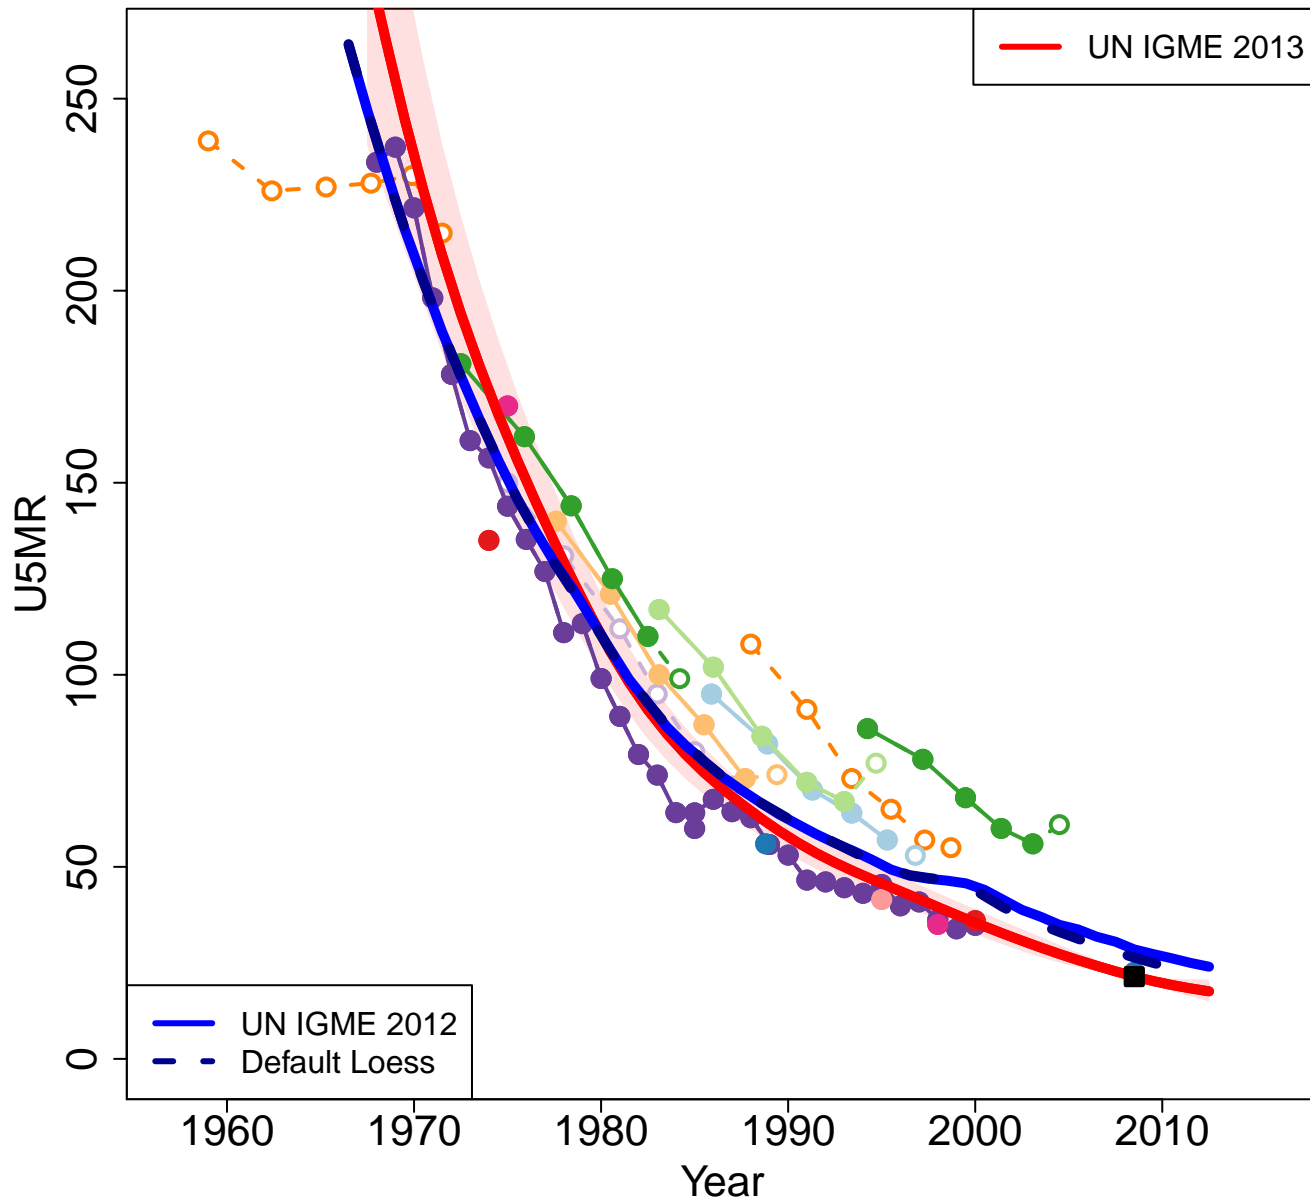

# Zoomed in

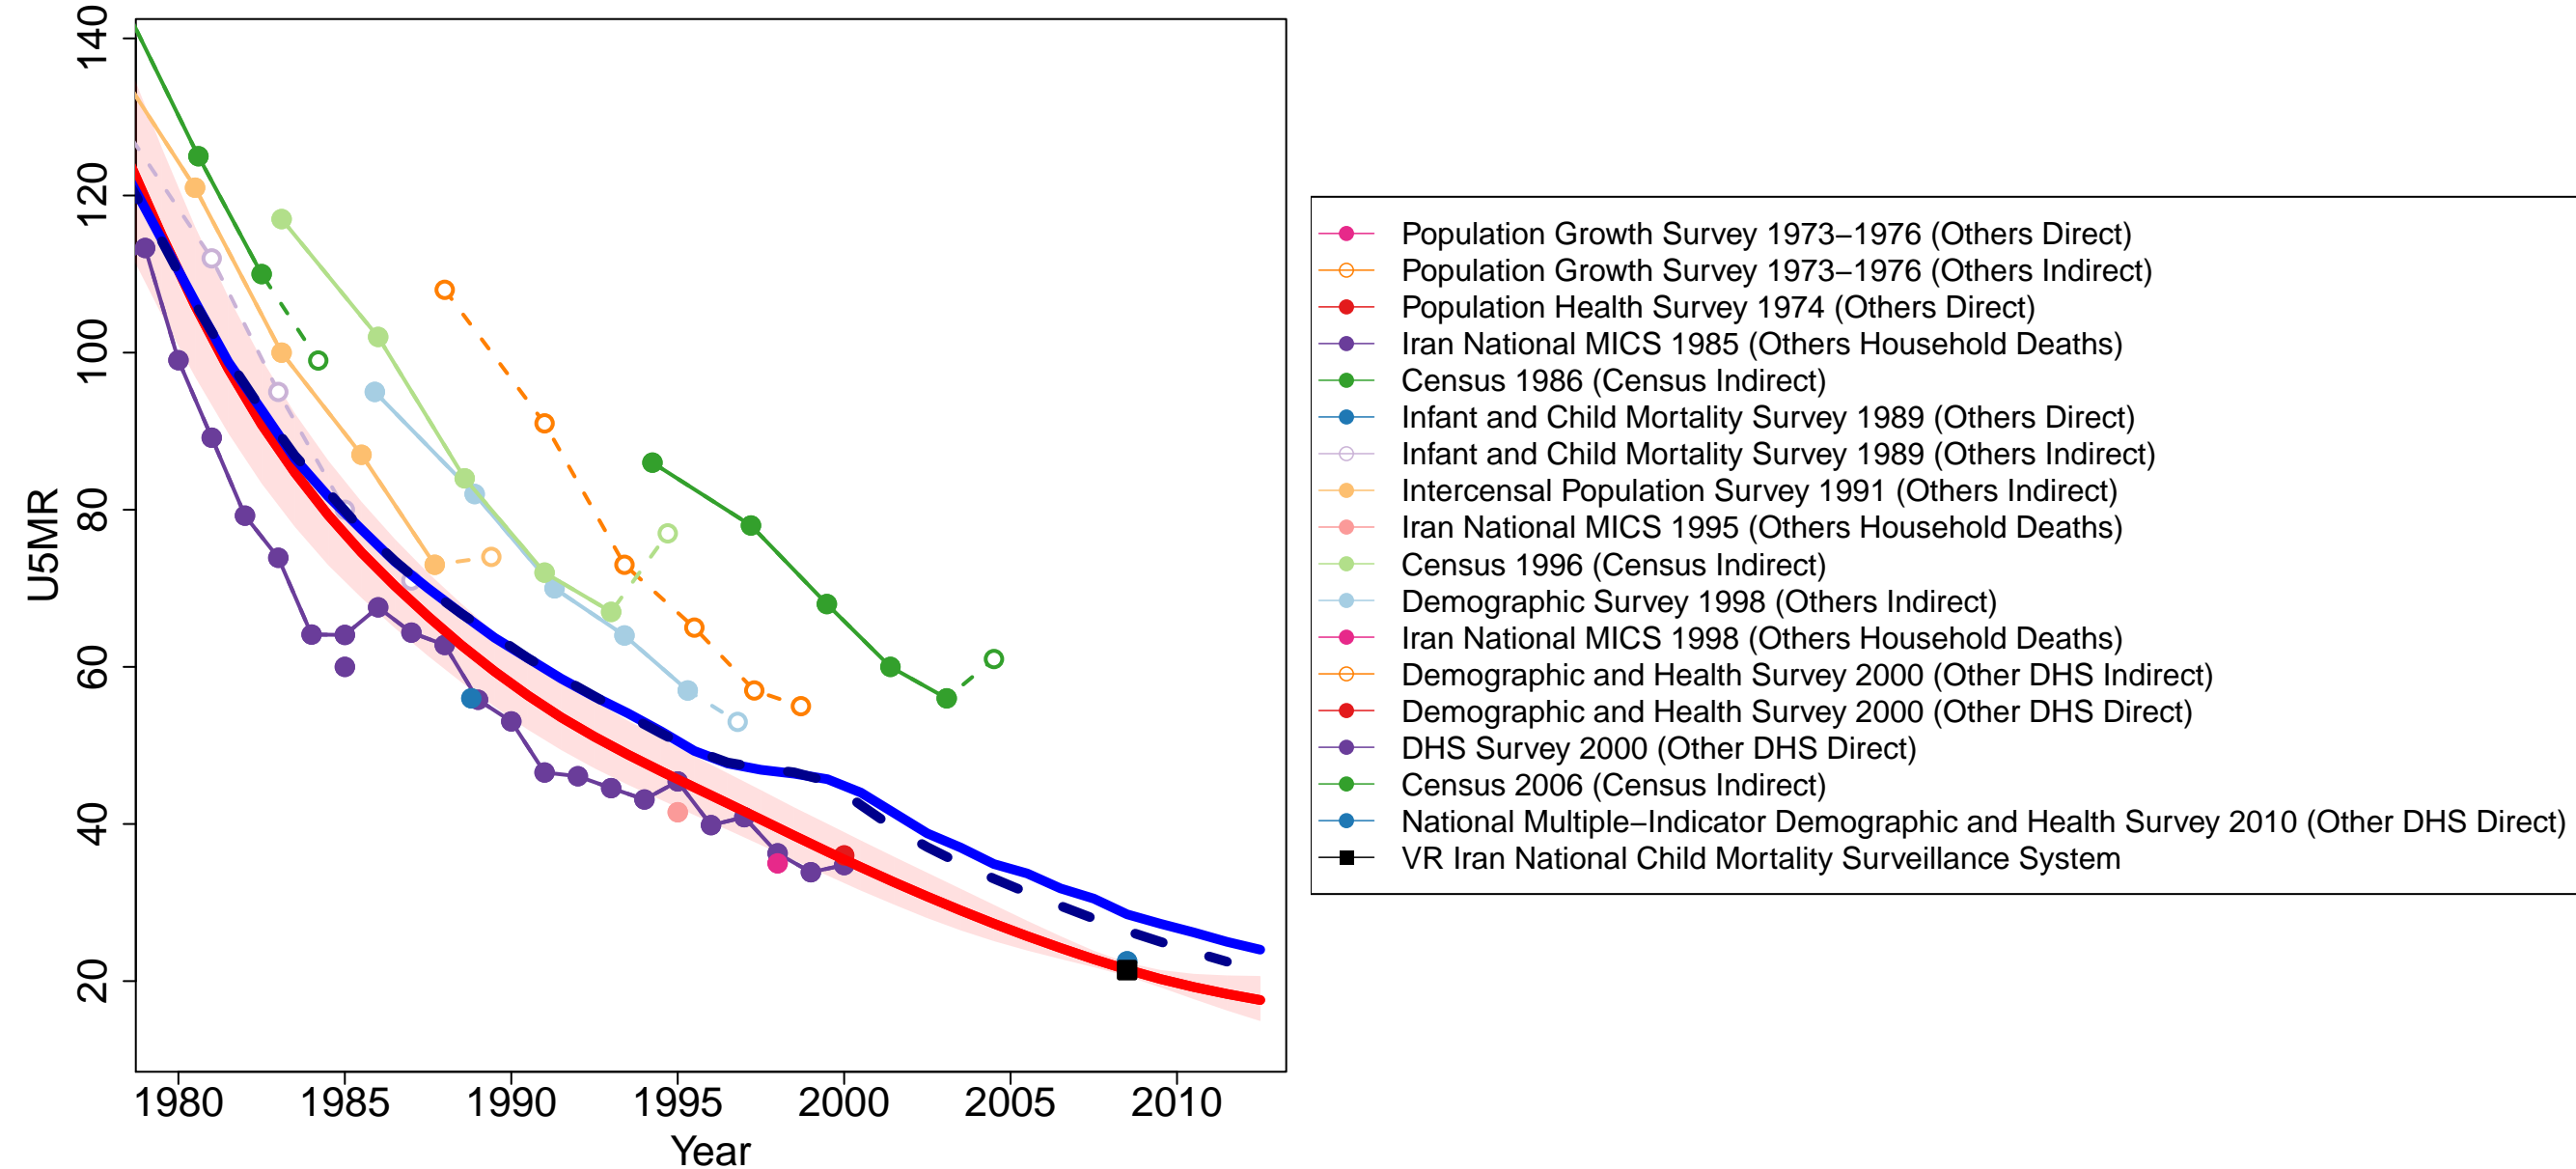



# Iraq

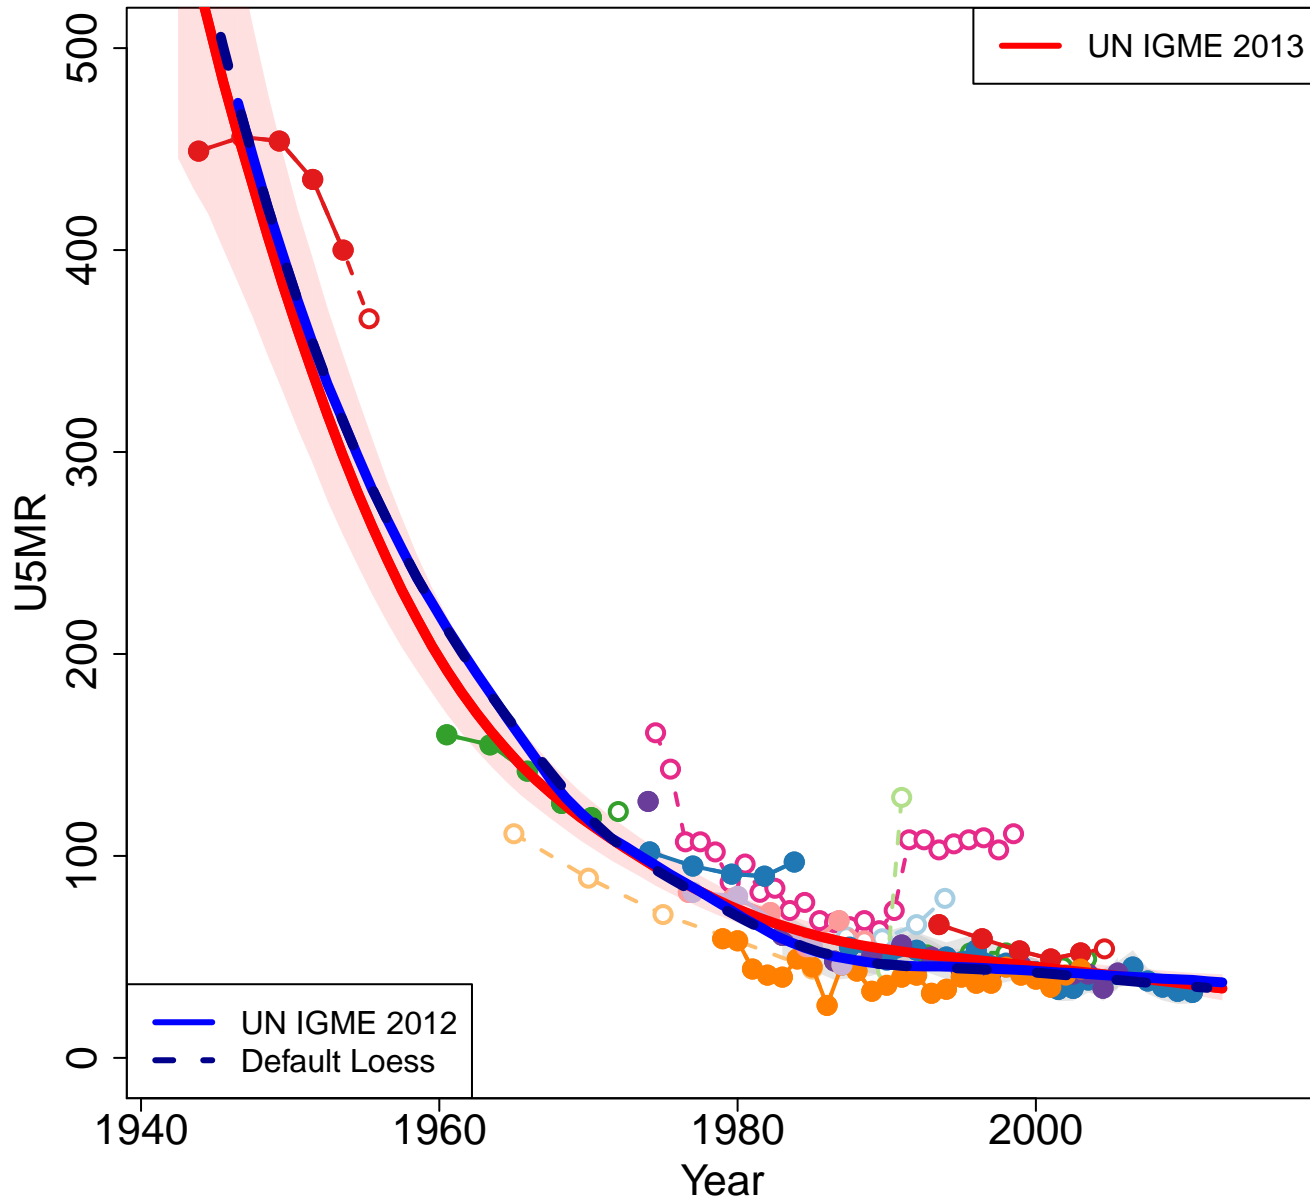

# Zoomed in

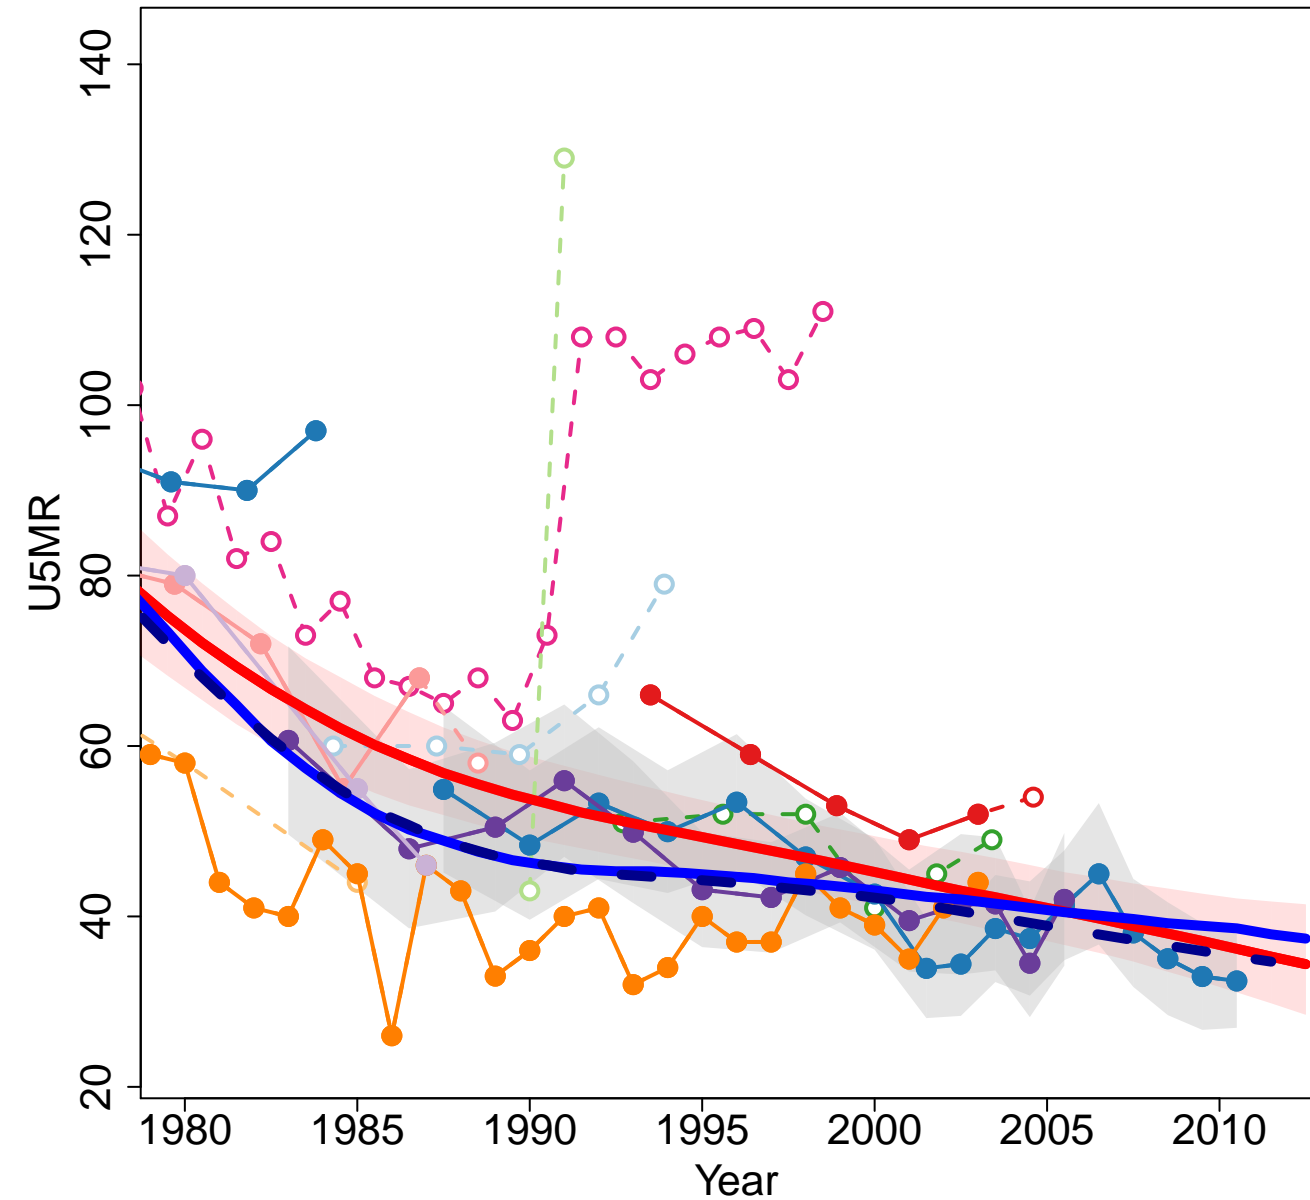

- Census 1957 (Census Indirect)
- Demographic Sample Survey and Sample Registration System 1973 (Others Direct)
- Fertility Survey 1974 (Others Indirect)
- Census 1987 (Census Indirect)
- Gulf Child Health Survey 1989 (Others Indirect)
- Gulf Child Health Survey 1989 (Others Direct)
- Immunization, Diarrhoeal Disease, Maternal and Child Mortality Survey 1990 (Others Indirect)
- Infant and Child Mortality and Nutrition Survey 1991 (Others Direct)
- Census 1997 (Census Indirect)
- Child and Maternal Mortality Survey 1999 (Others Direct)
- Living Conditions Survey 2004 (Others Direct)
- Iraq Family Health Survey 2006 (Others Indirect)
- Multiple Indicator Cluster Survey 2006 (MICS Direct)
- Multiple Indicator Cluster Survey 2006 (MICS Indirect)
- Multiple Indicator Cluster Survey 2011 (MICS Direct)

# Jamaica

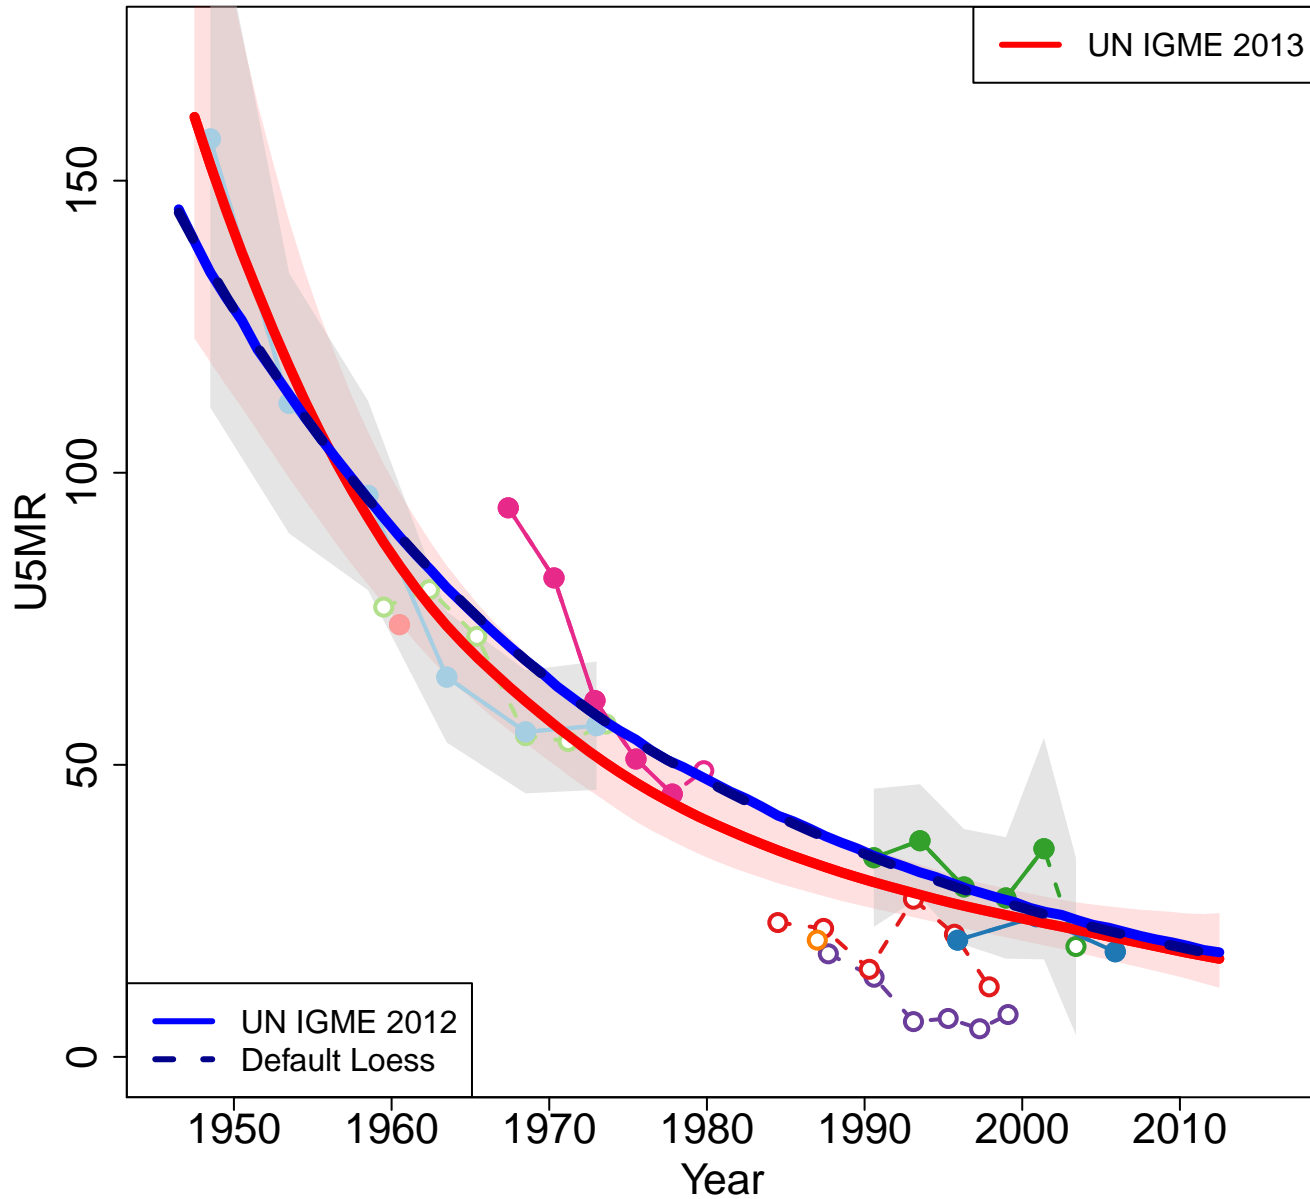

# Zoomed in

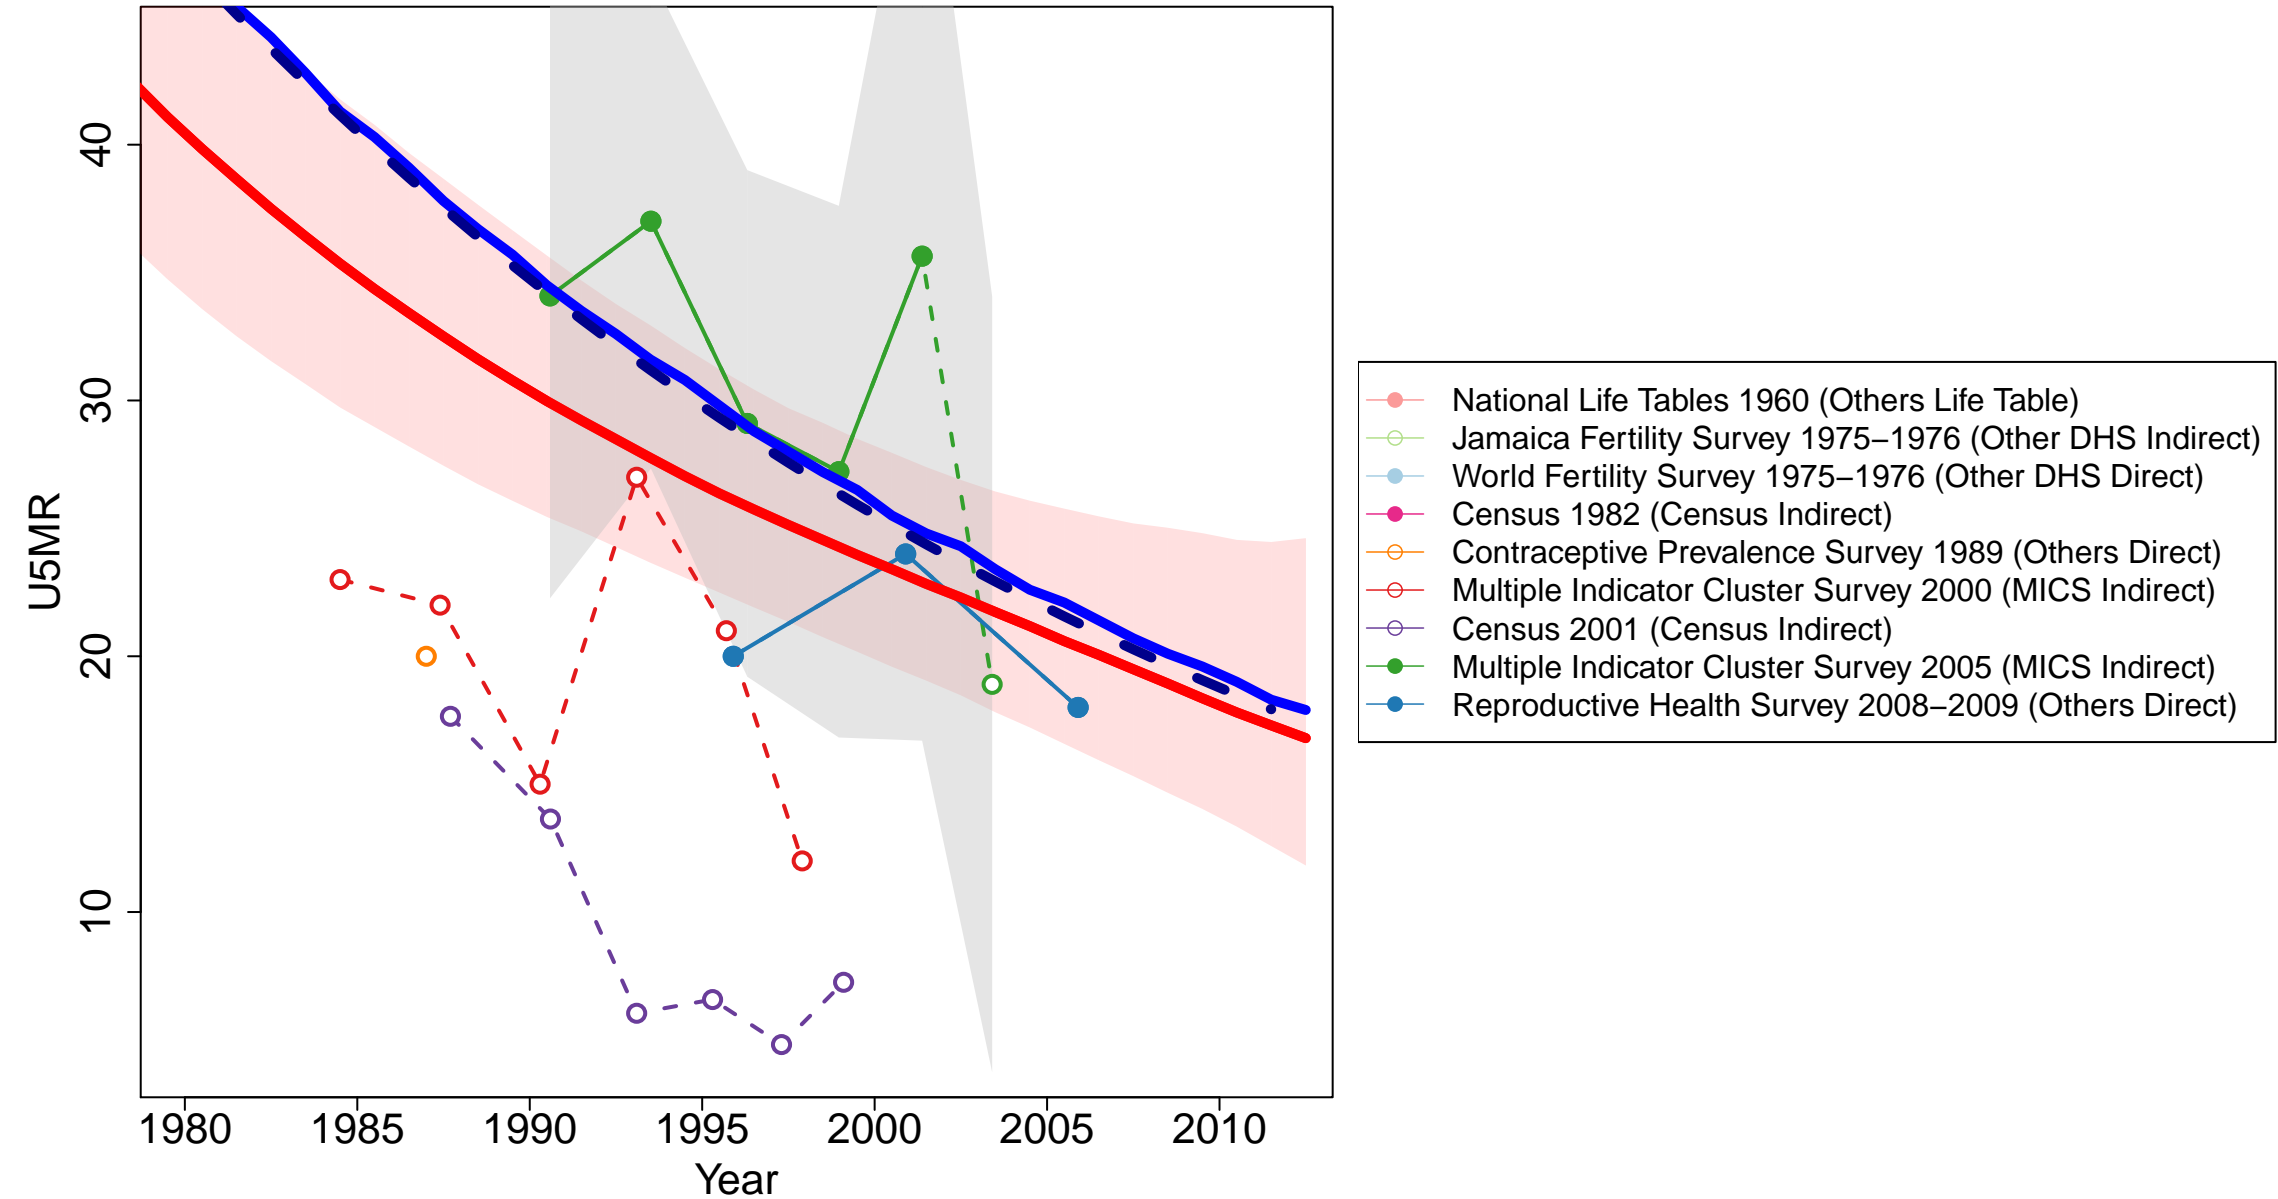

# Jordan

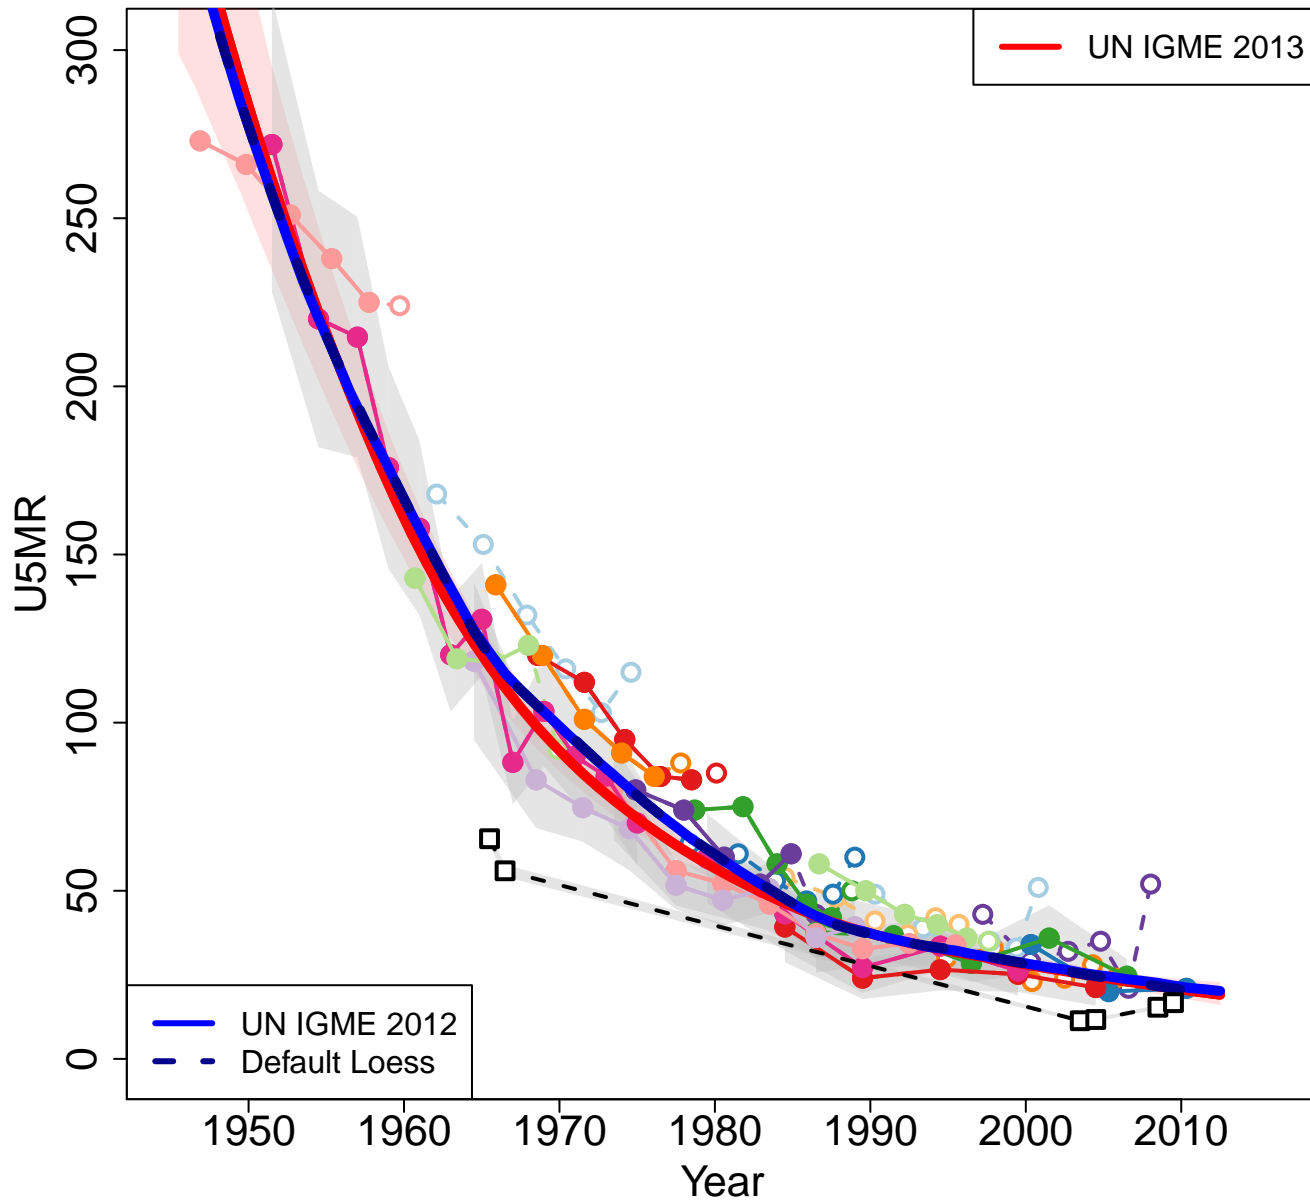

# Zoomed in

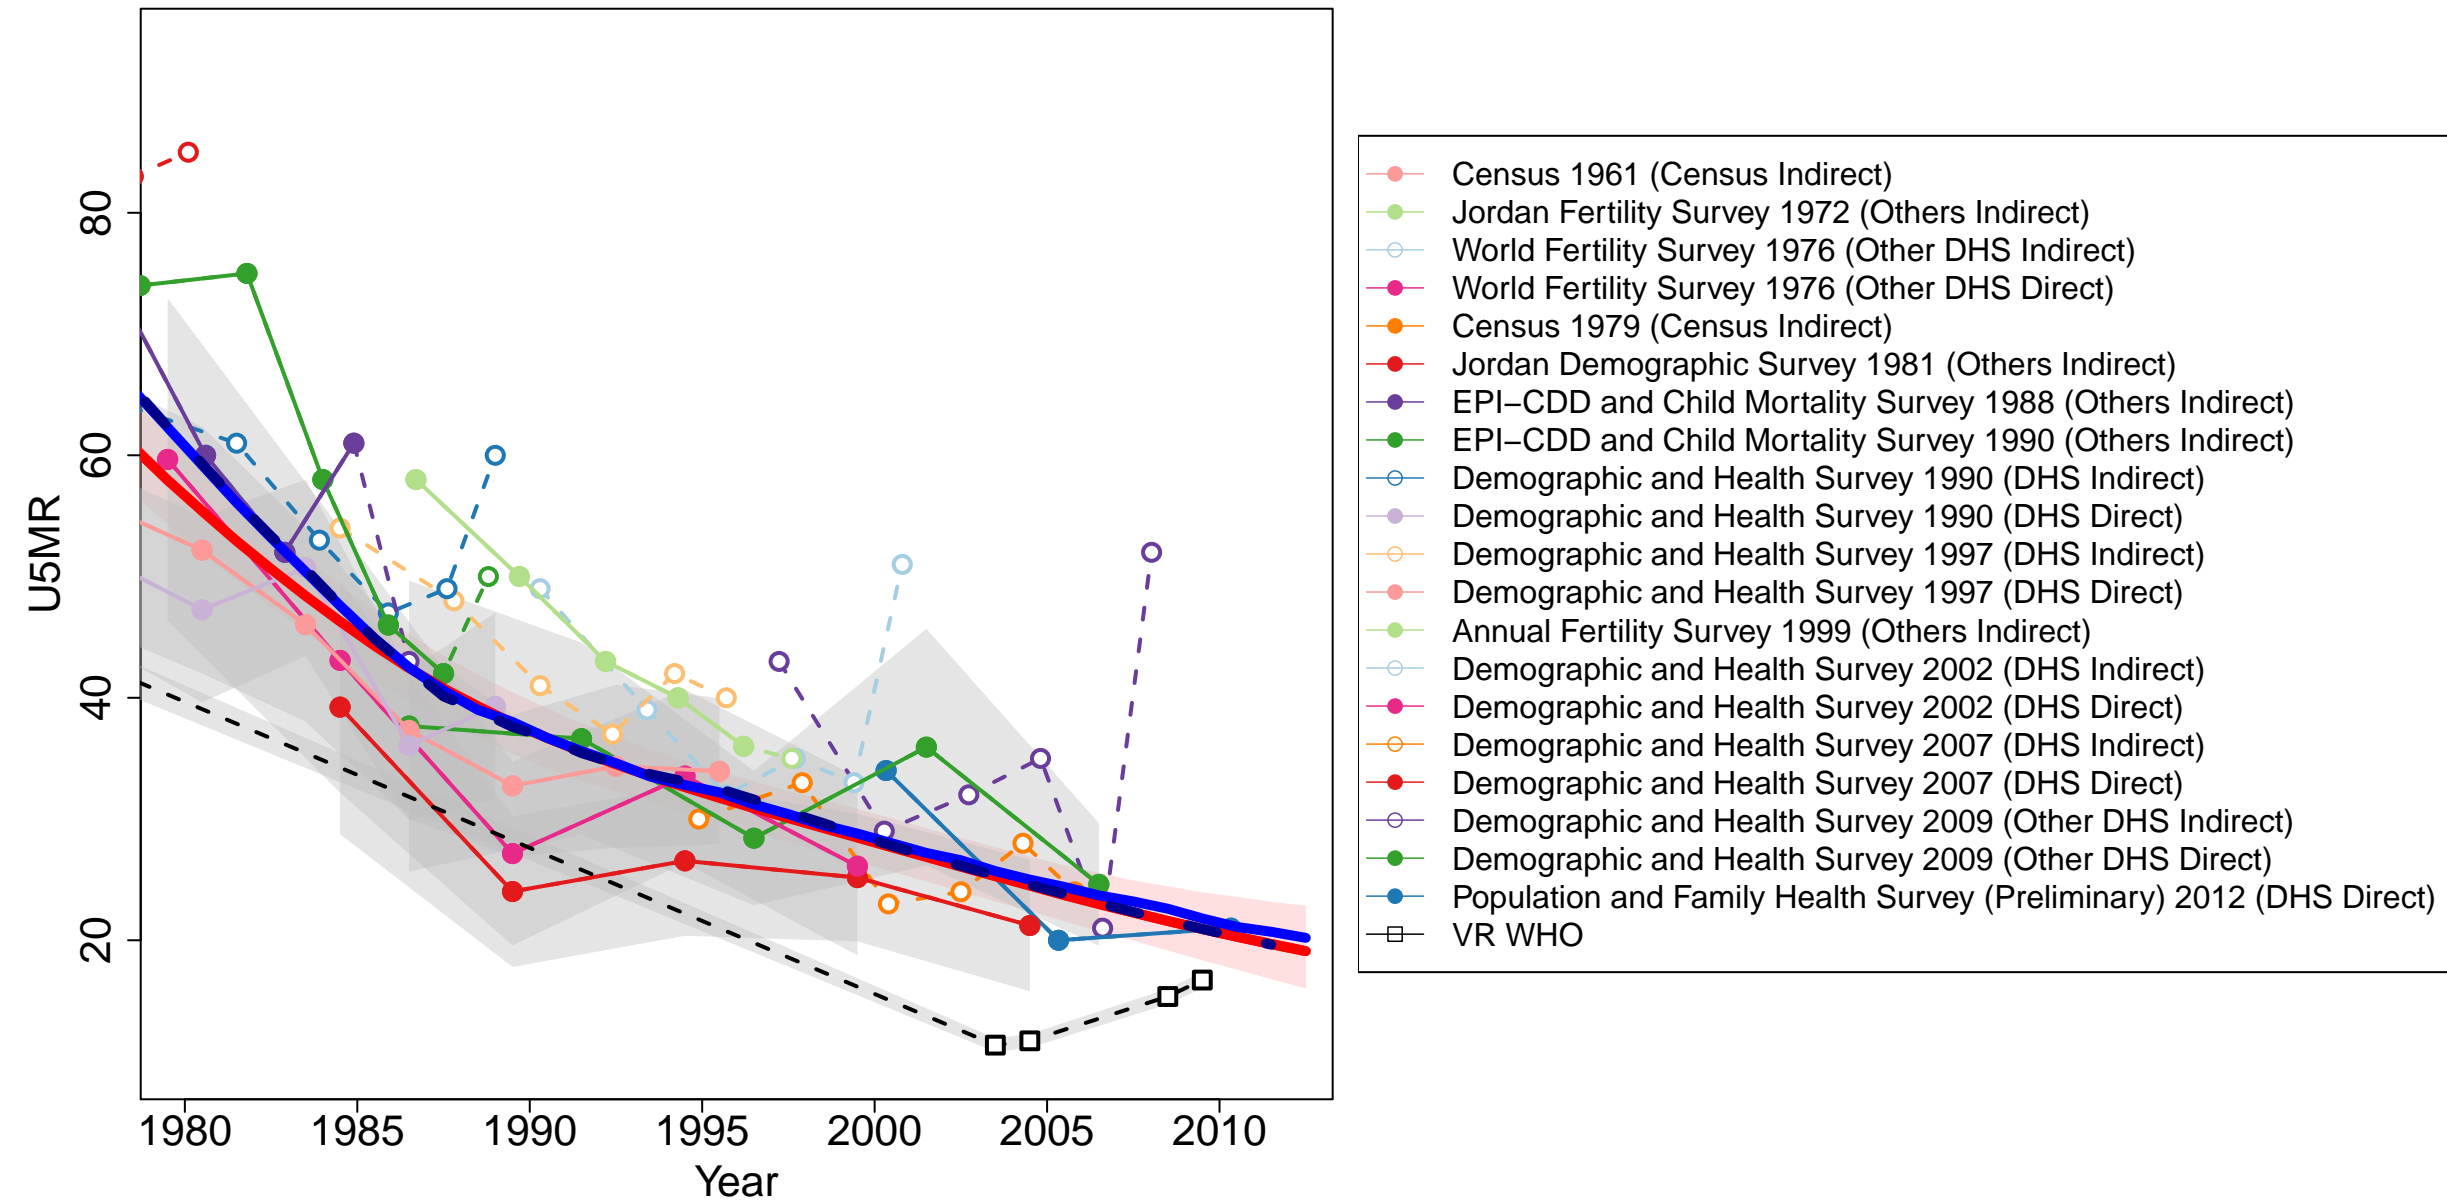

# Kazakhstan

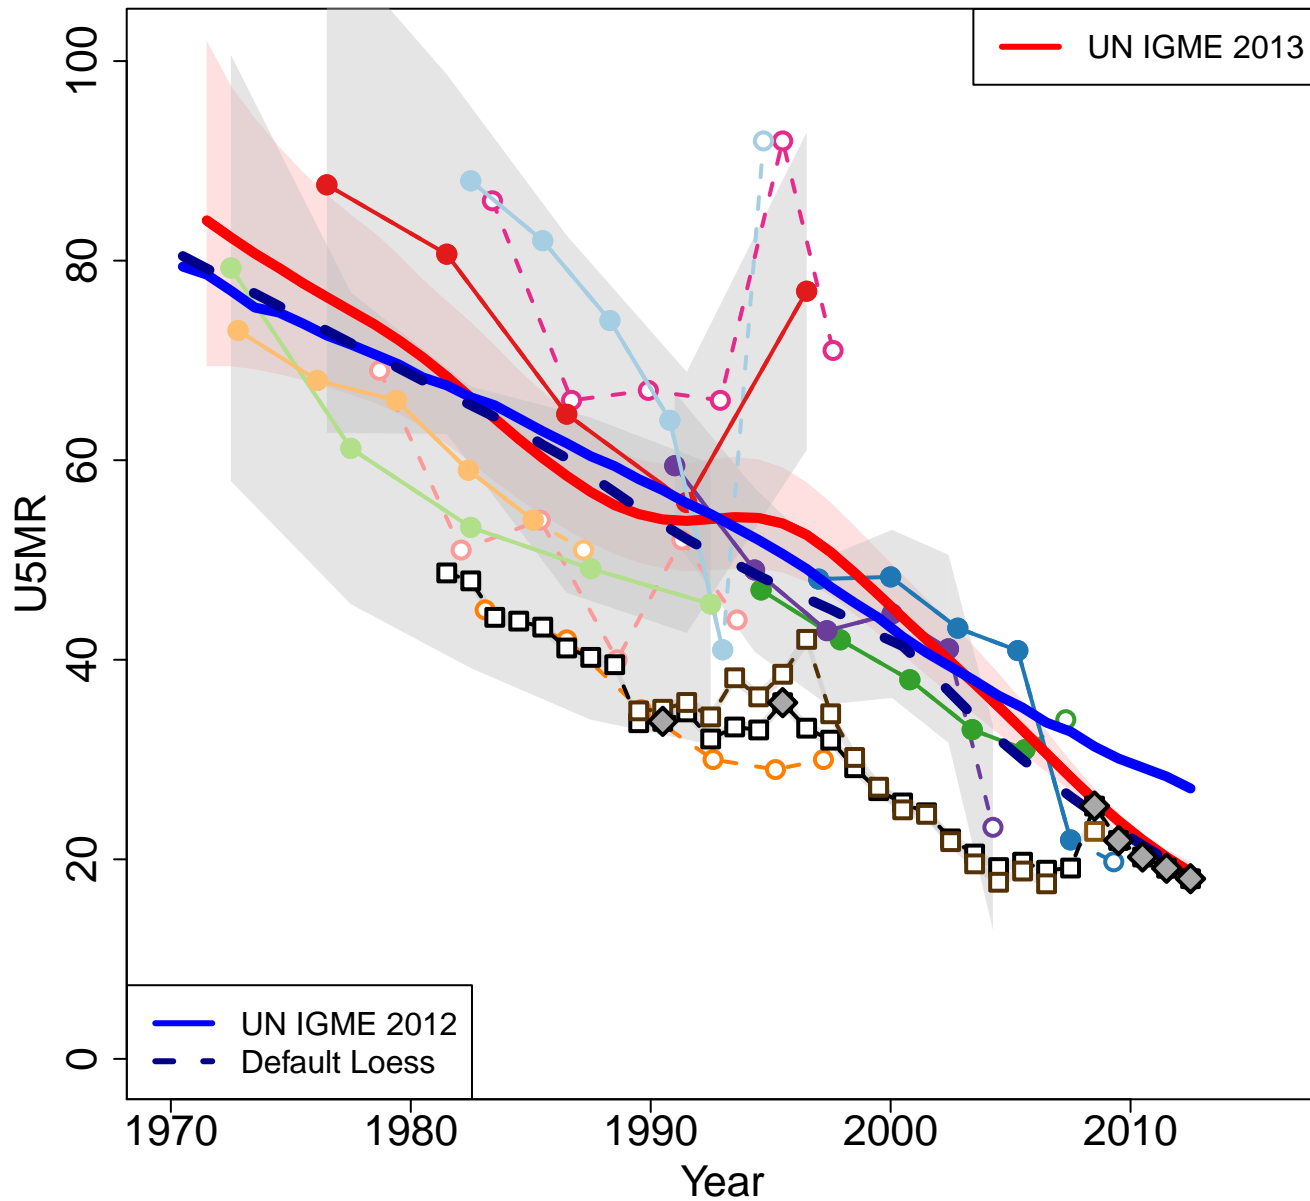

# Zoomed in

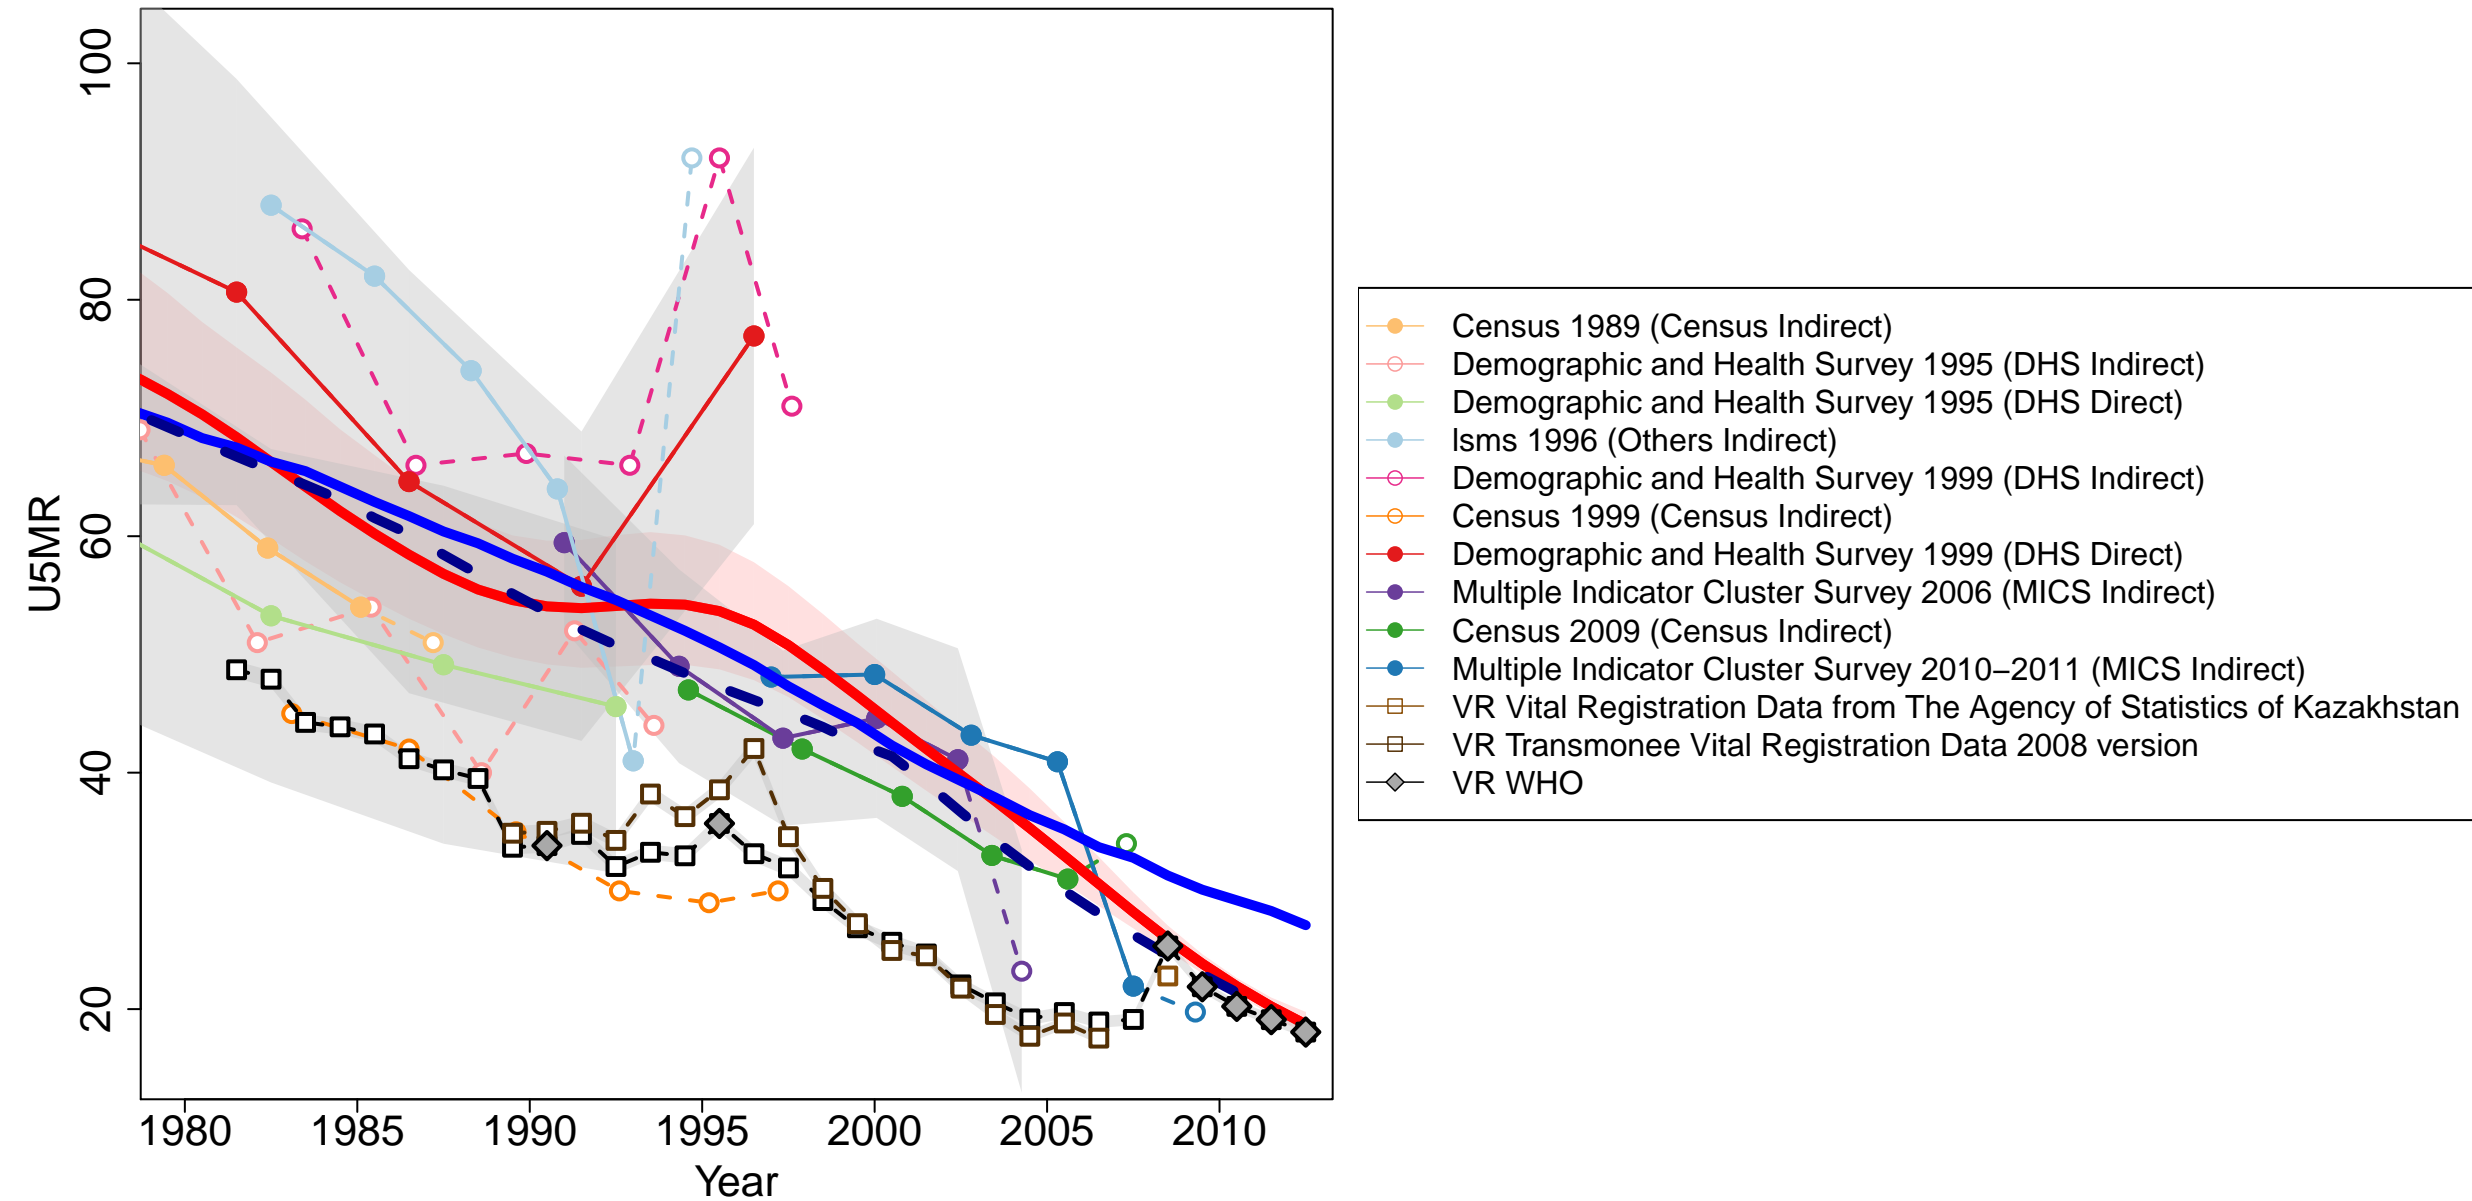

# Kiribati

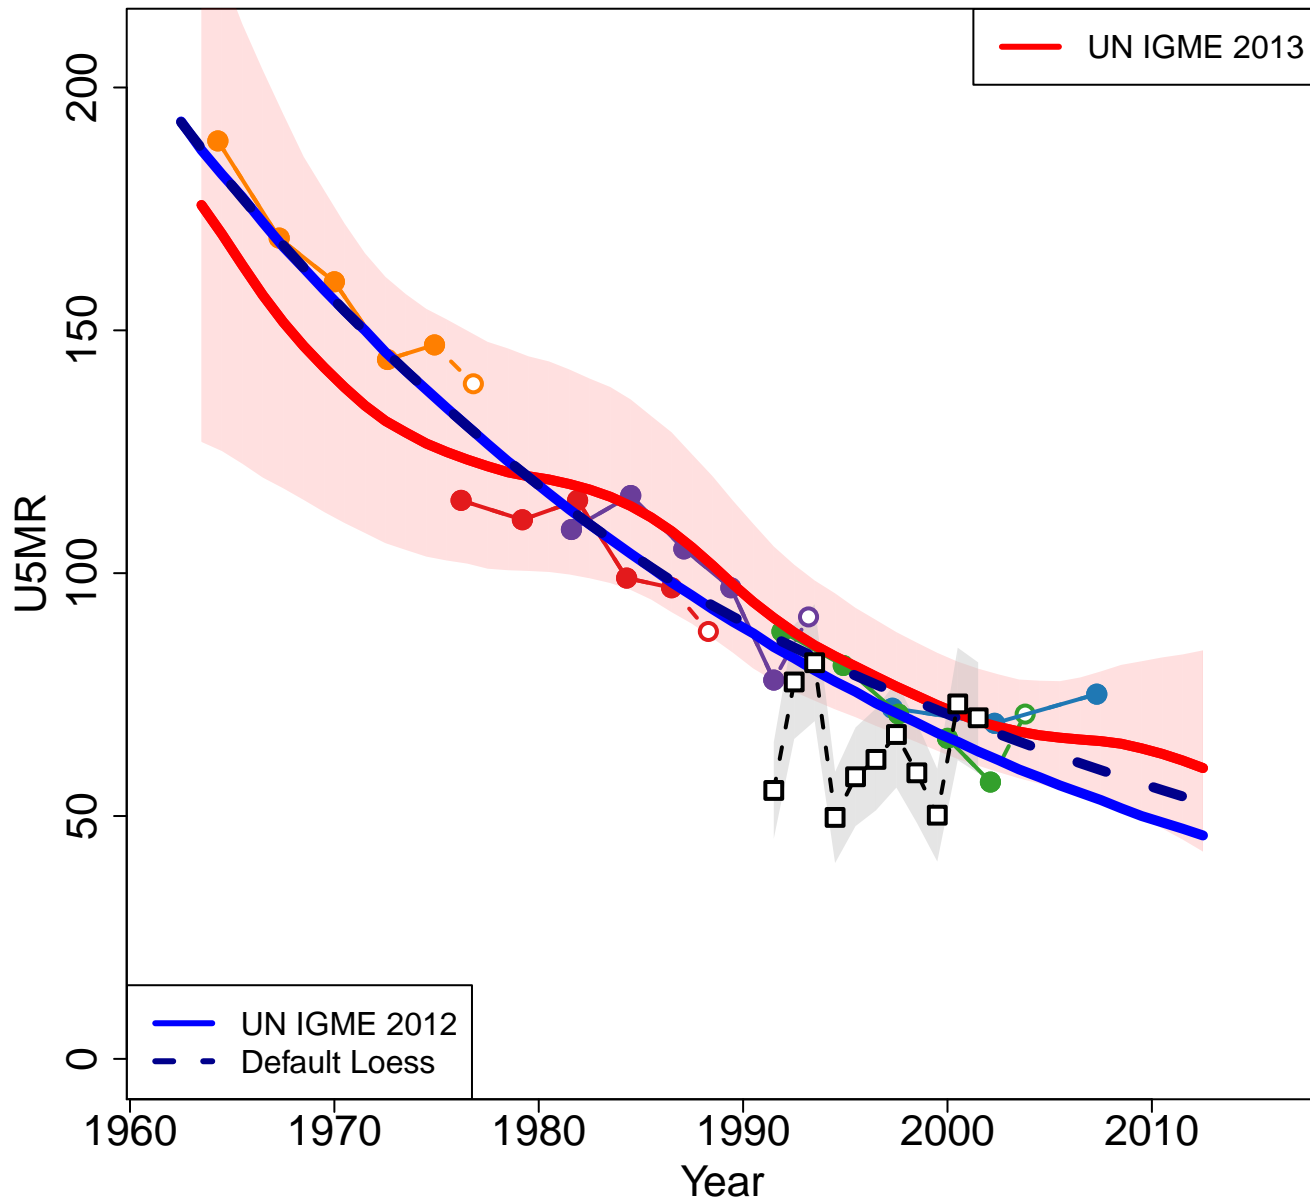

# Zoomed in

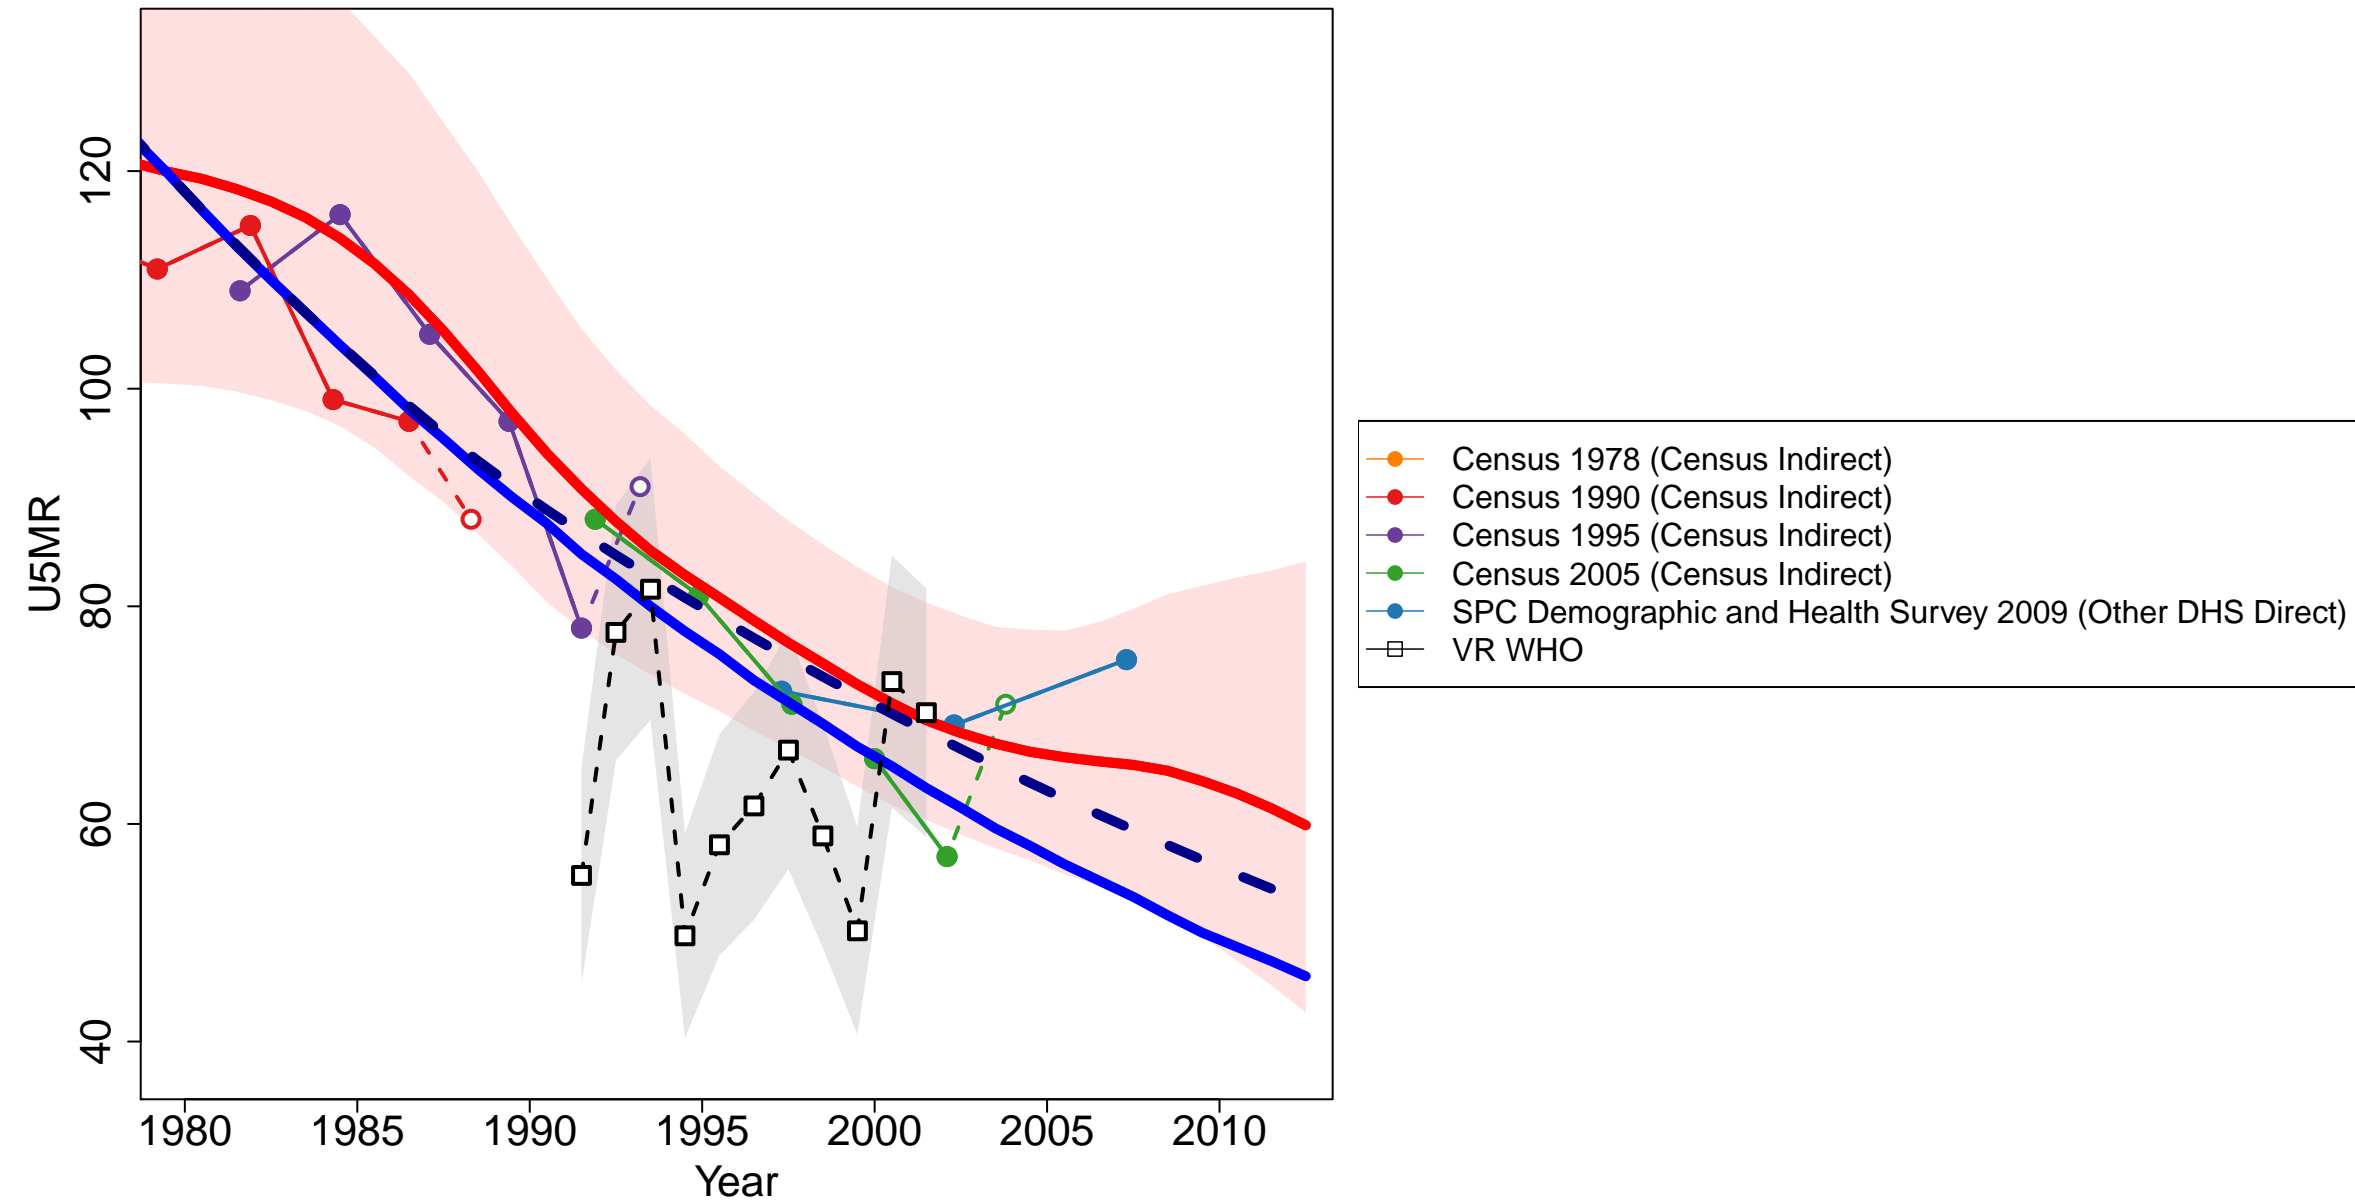

# Kuwait

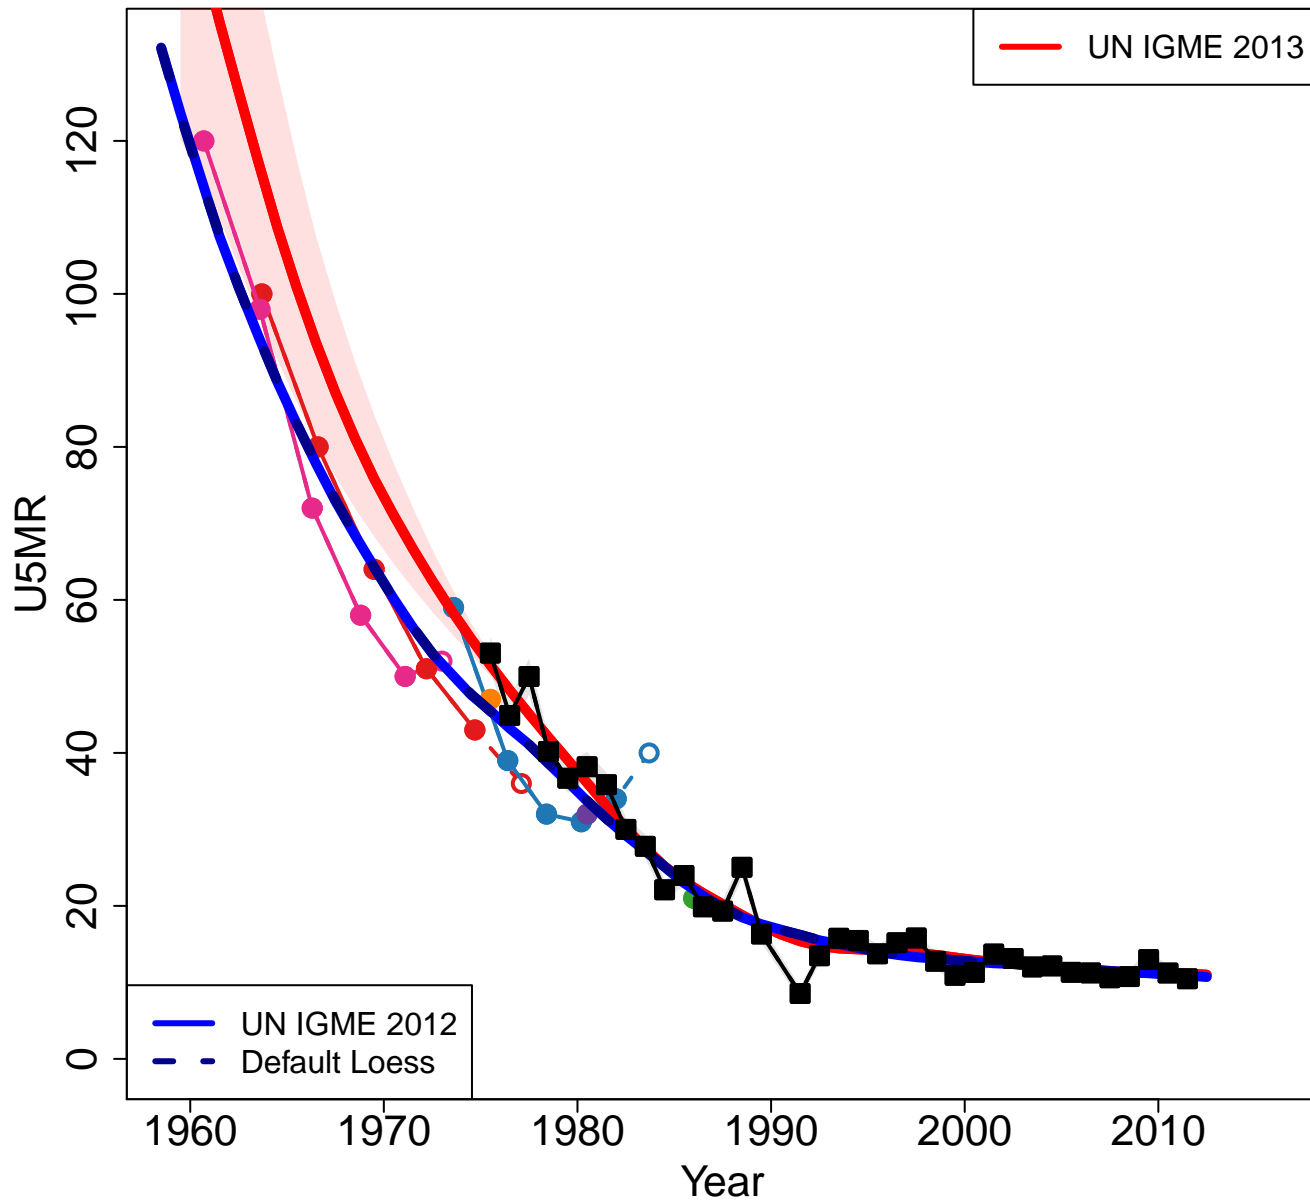

# Zoomed in

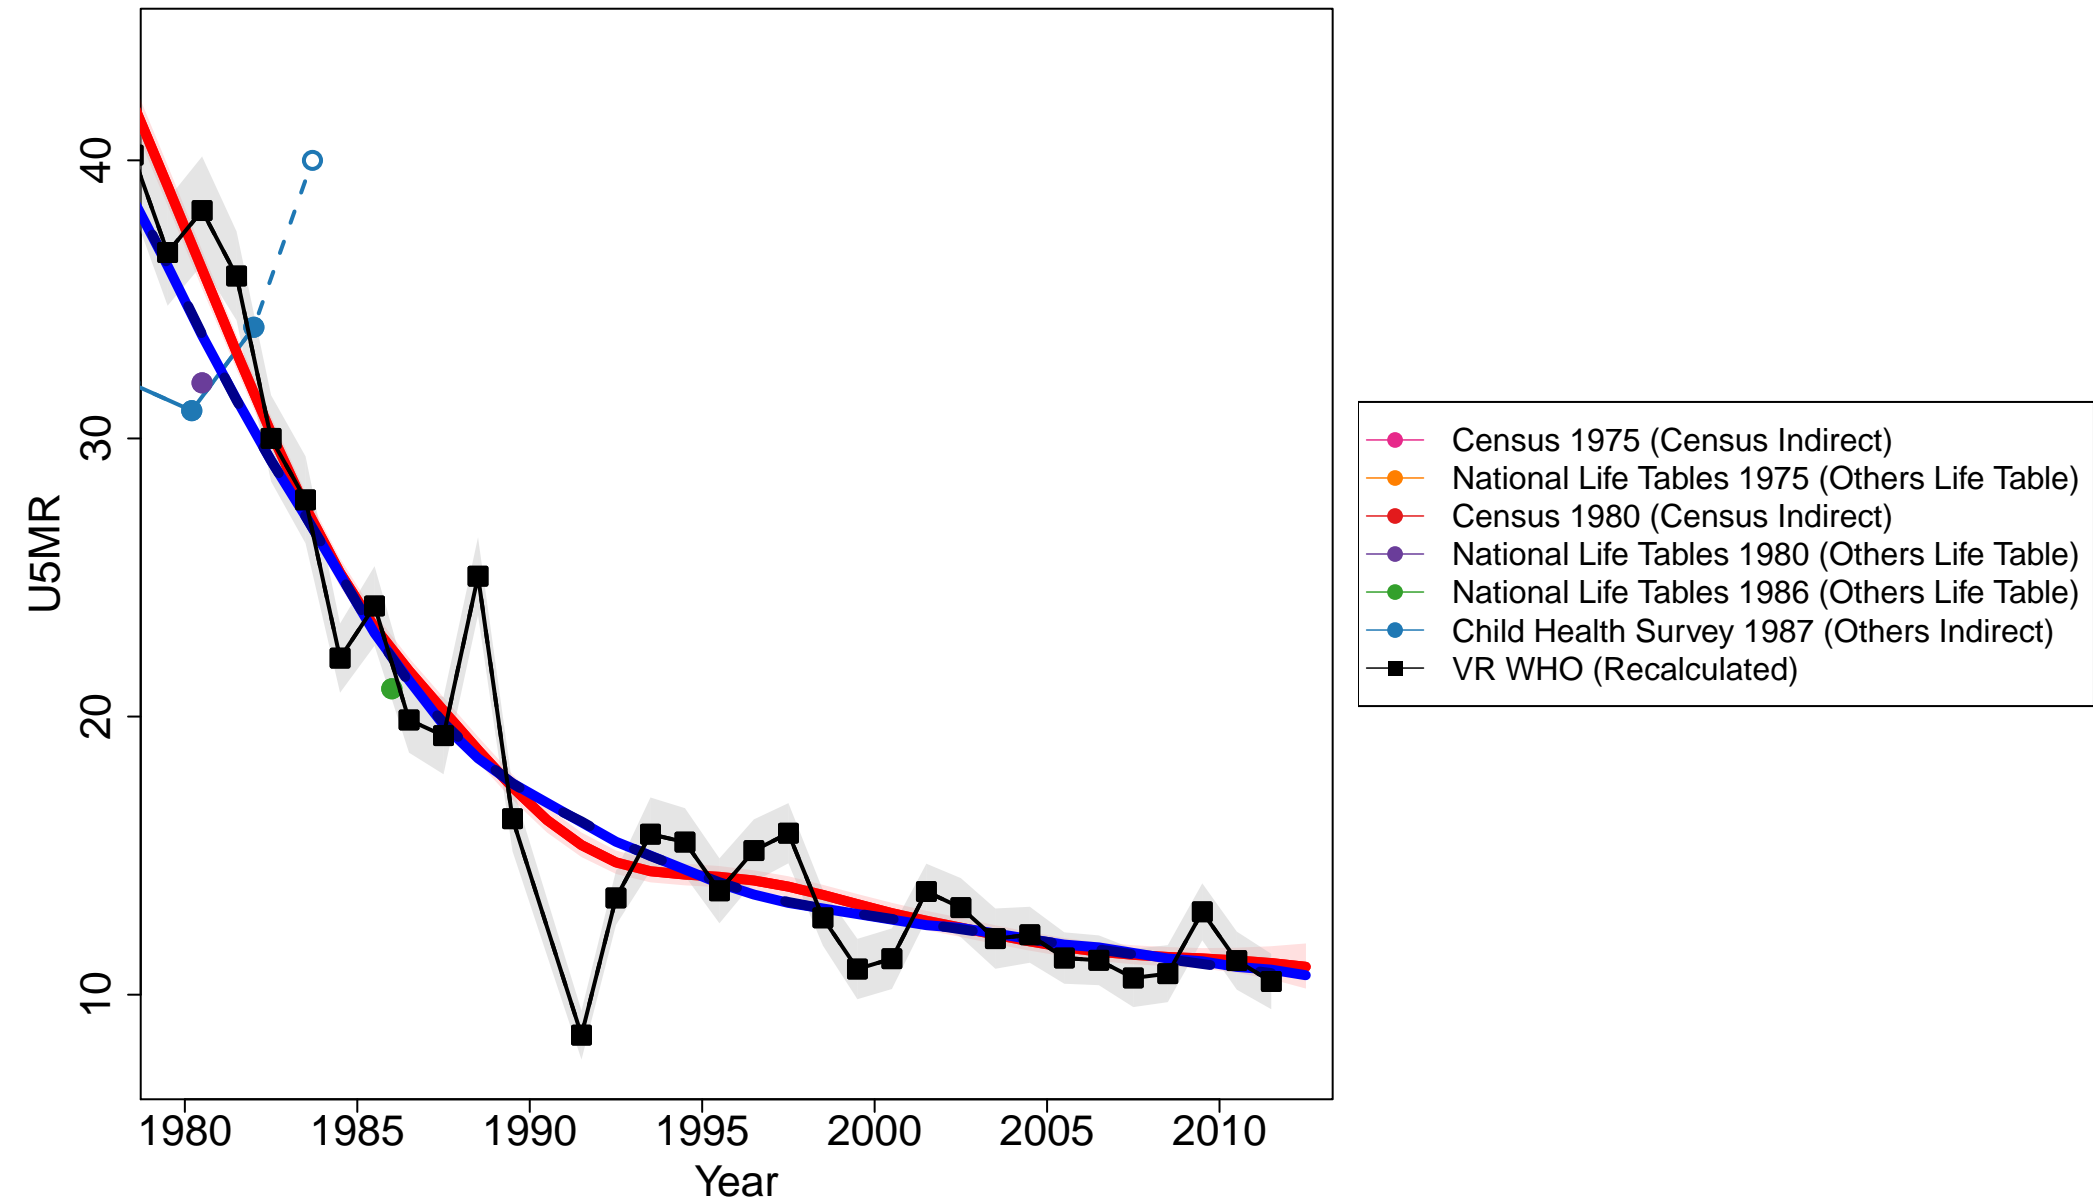

# Kyrgyzstan

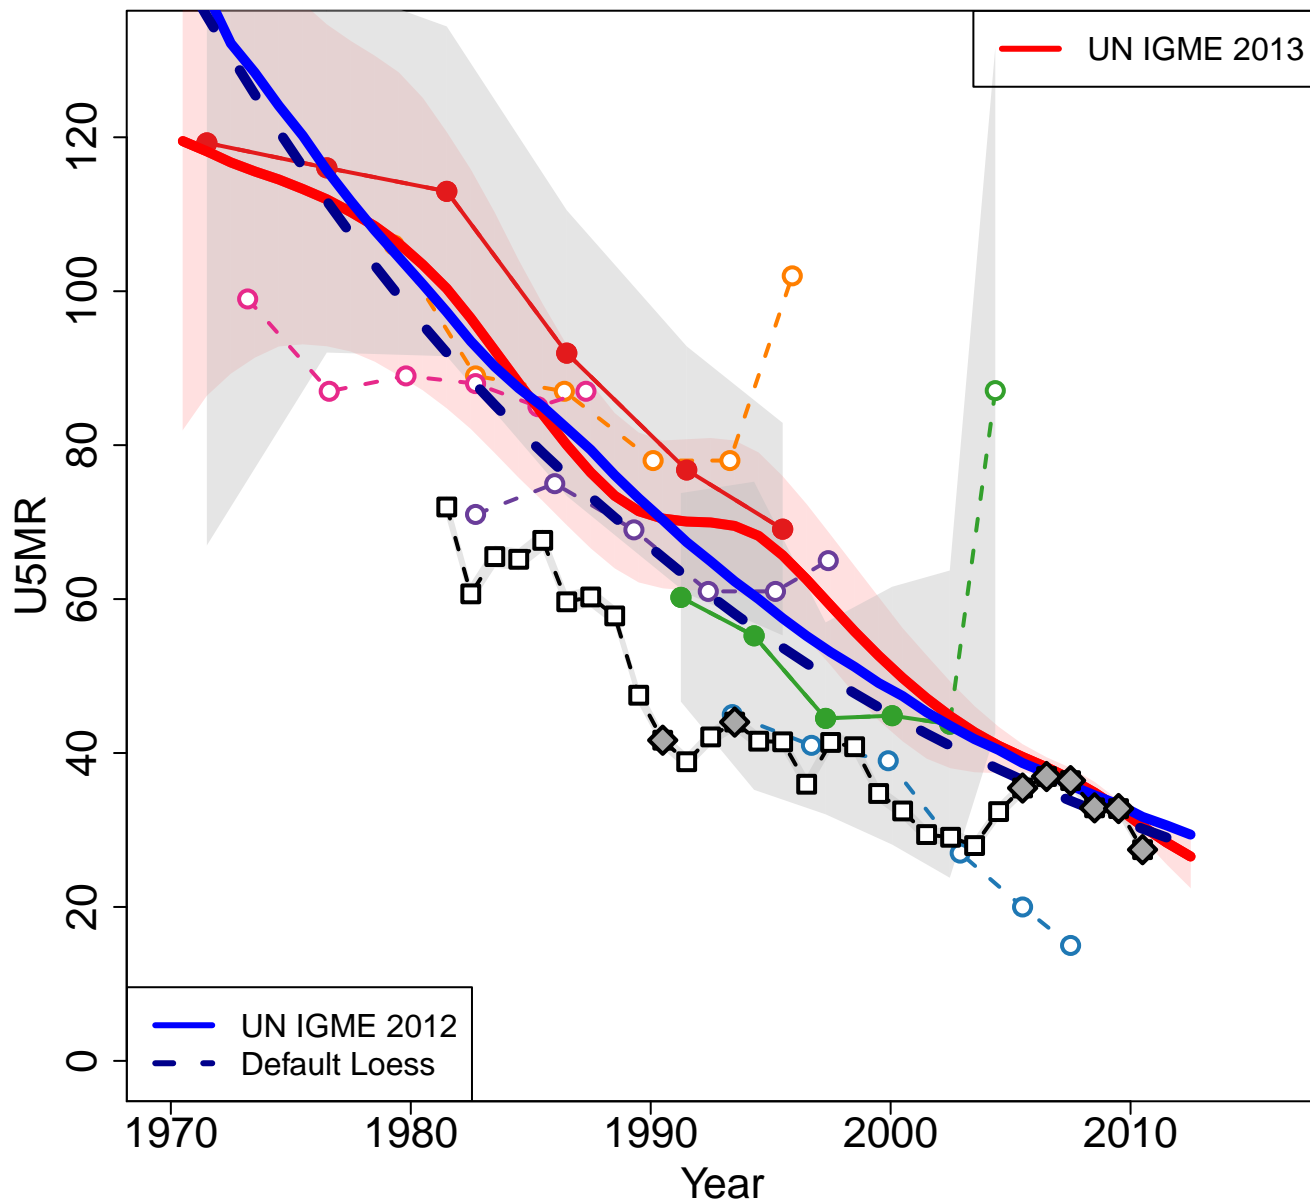

# Zoomed in

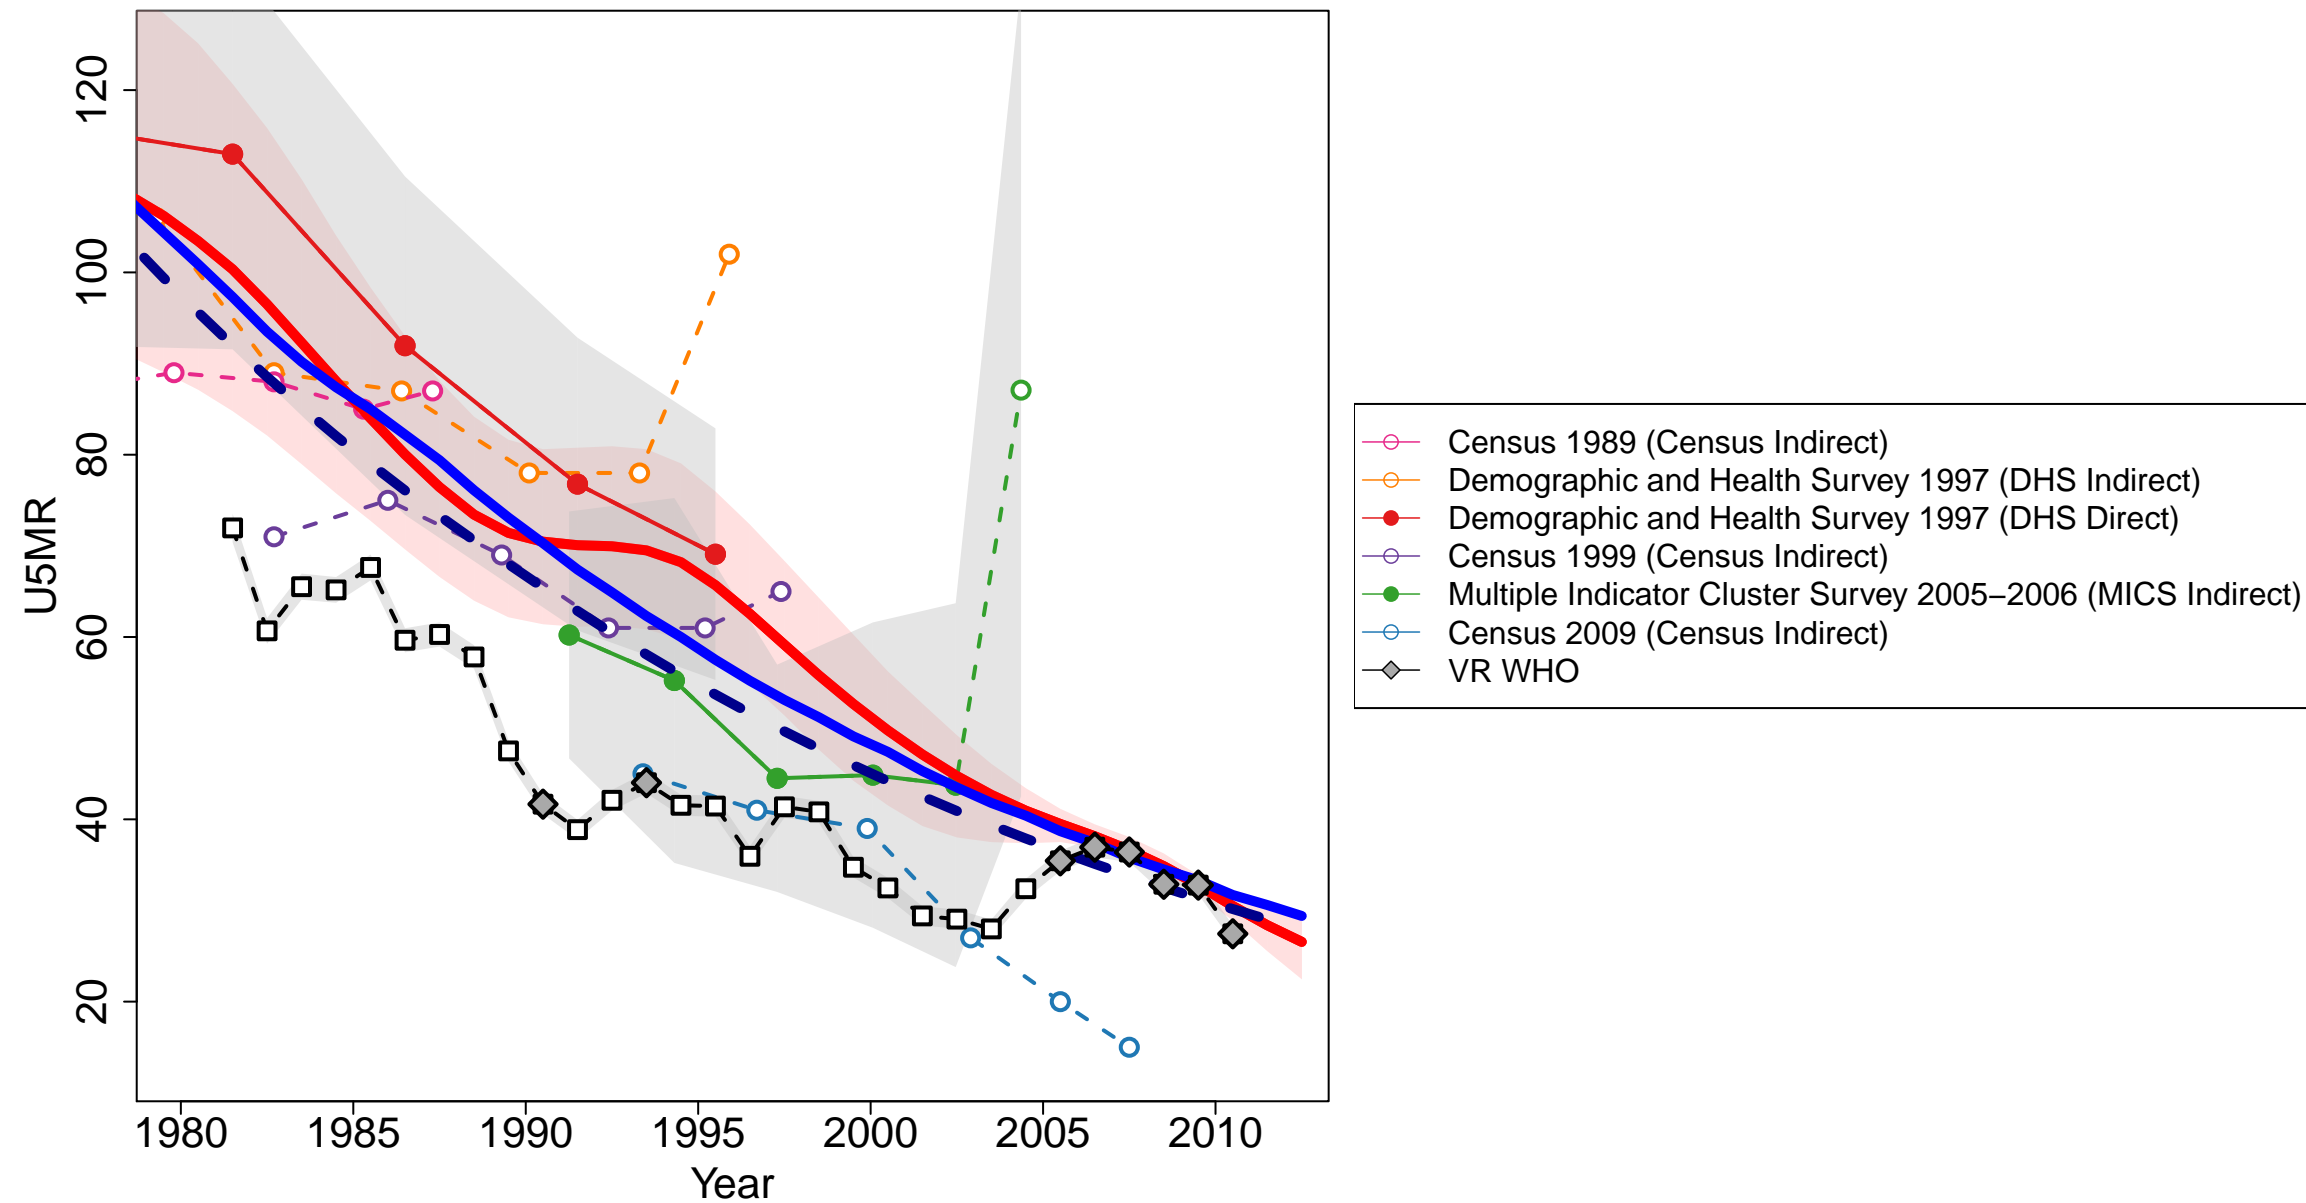



# Lao PDR

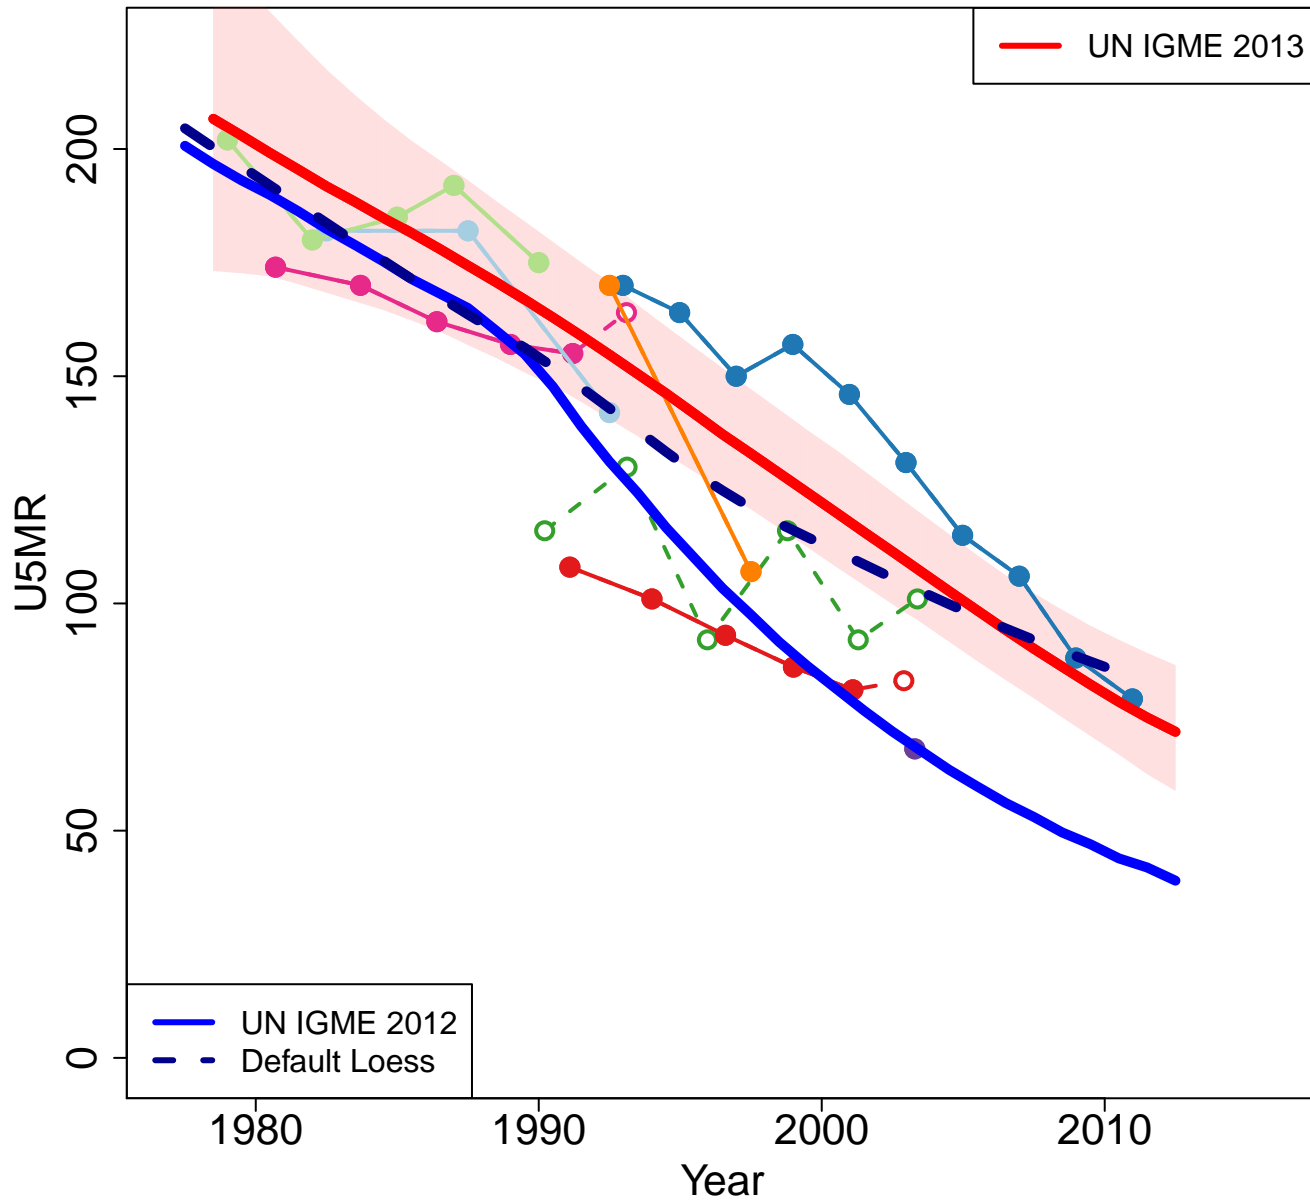

# Zoomed in

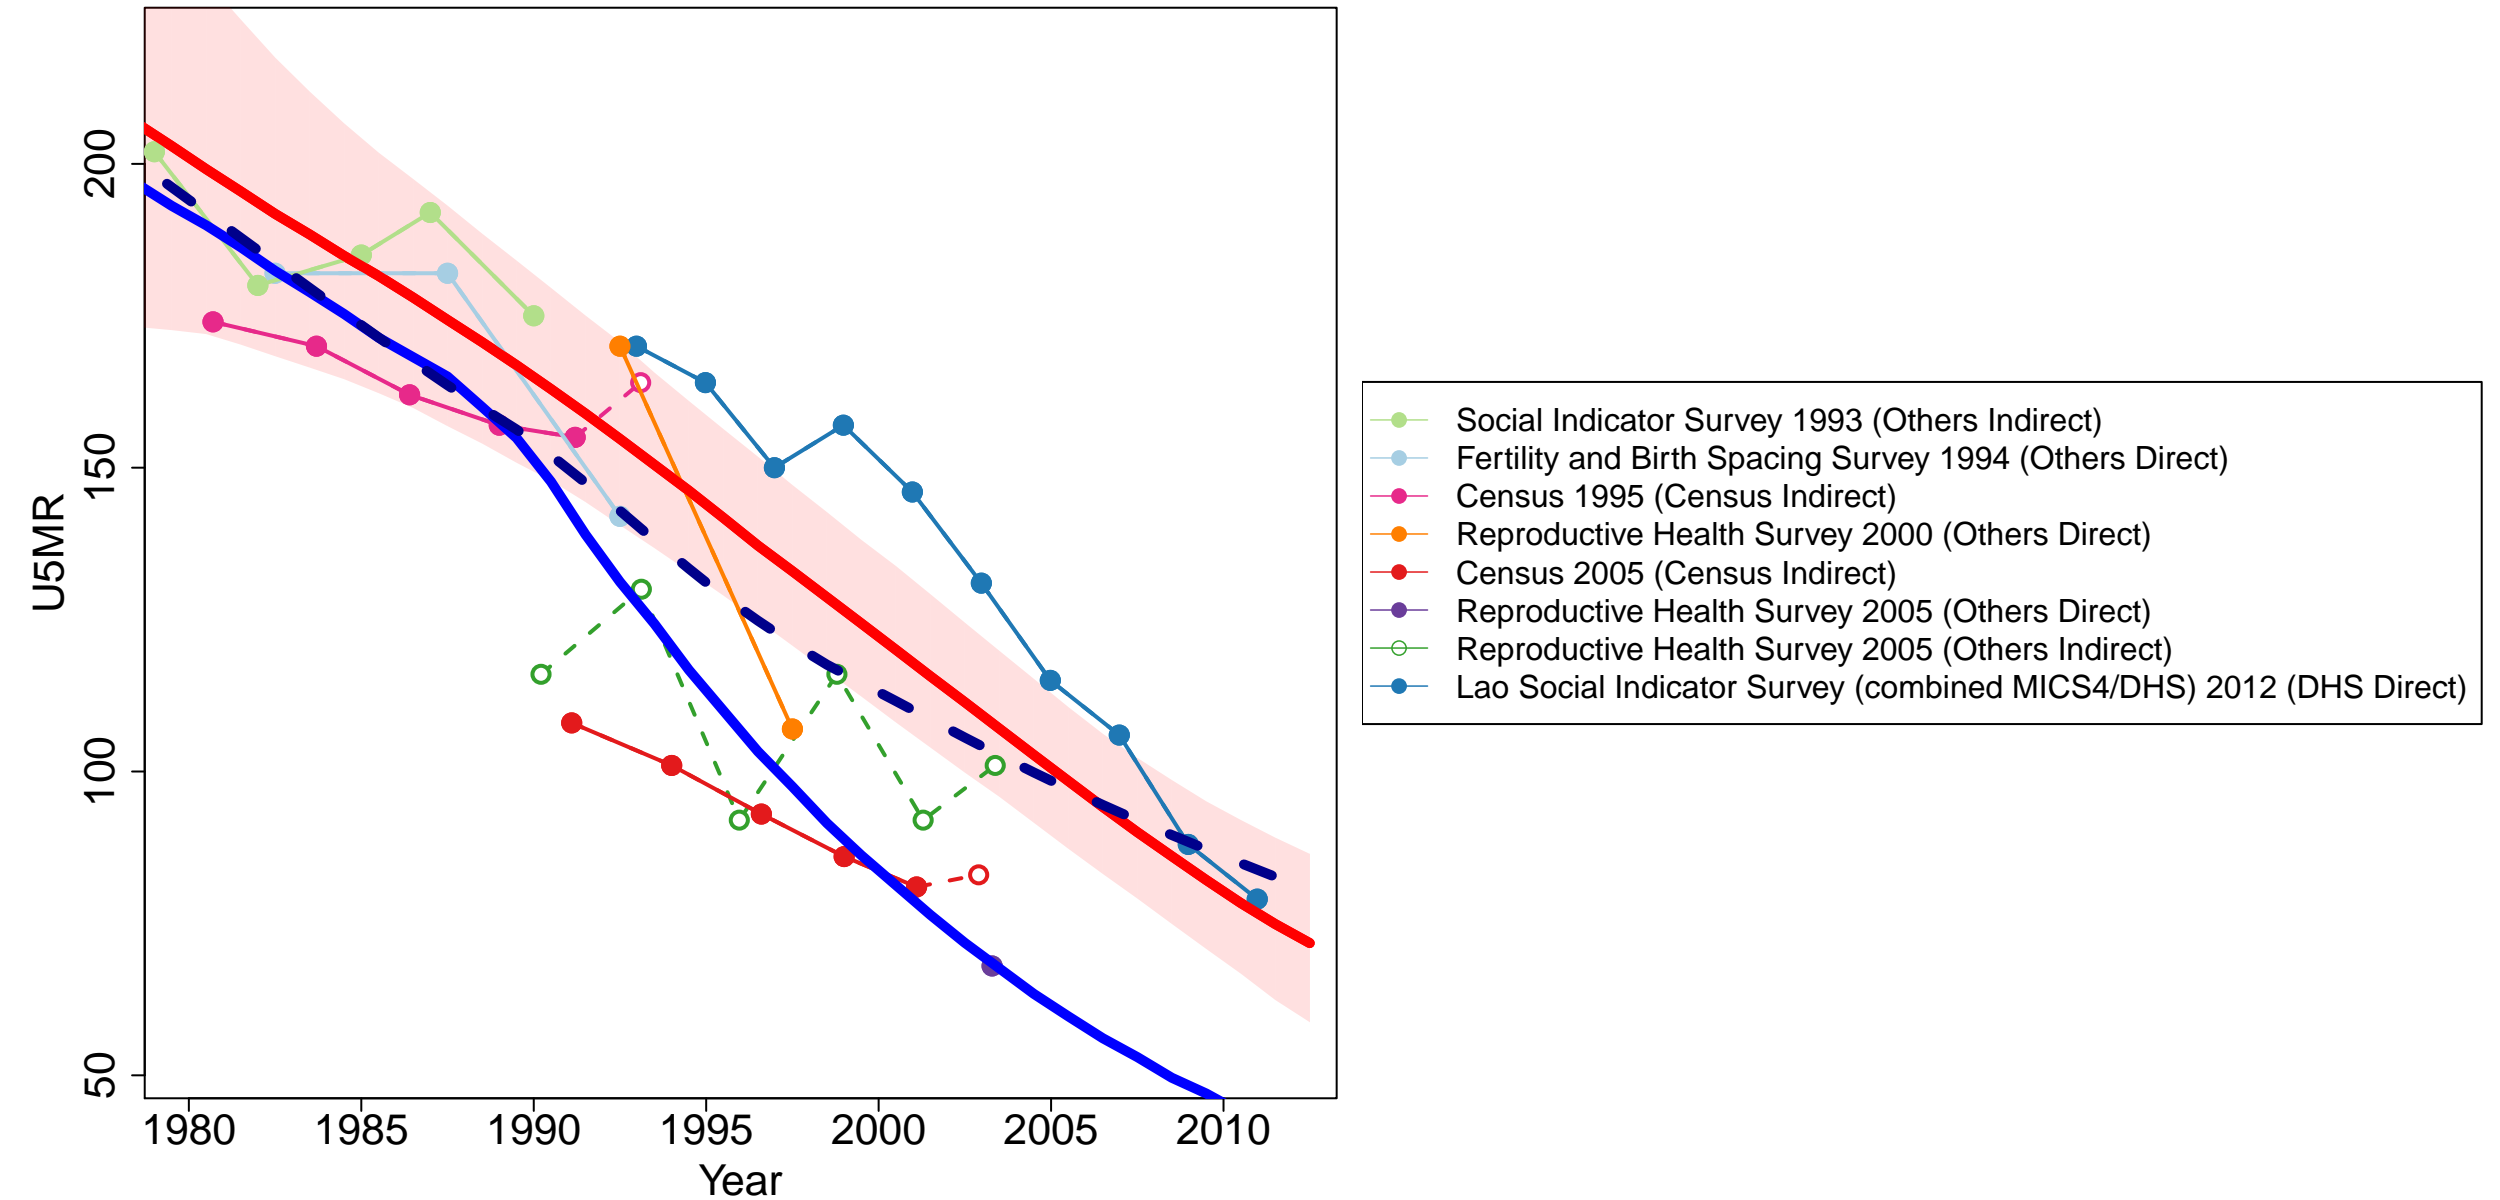

# Lebanon

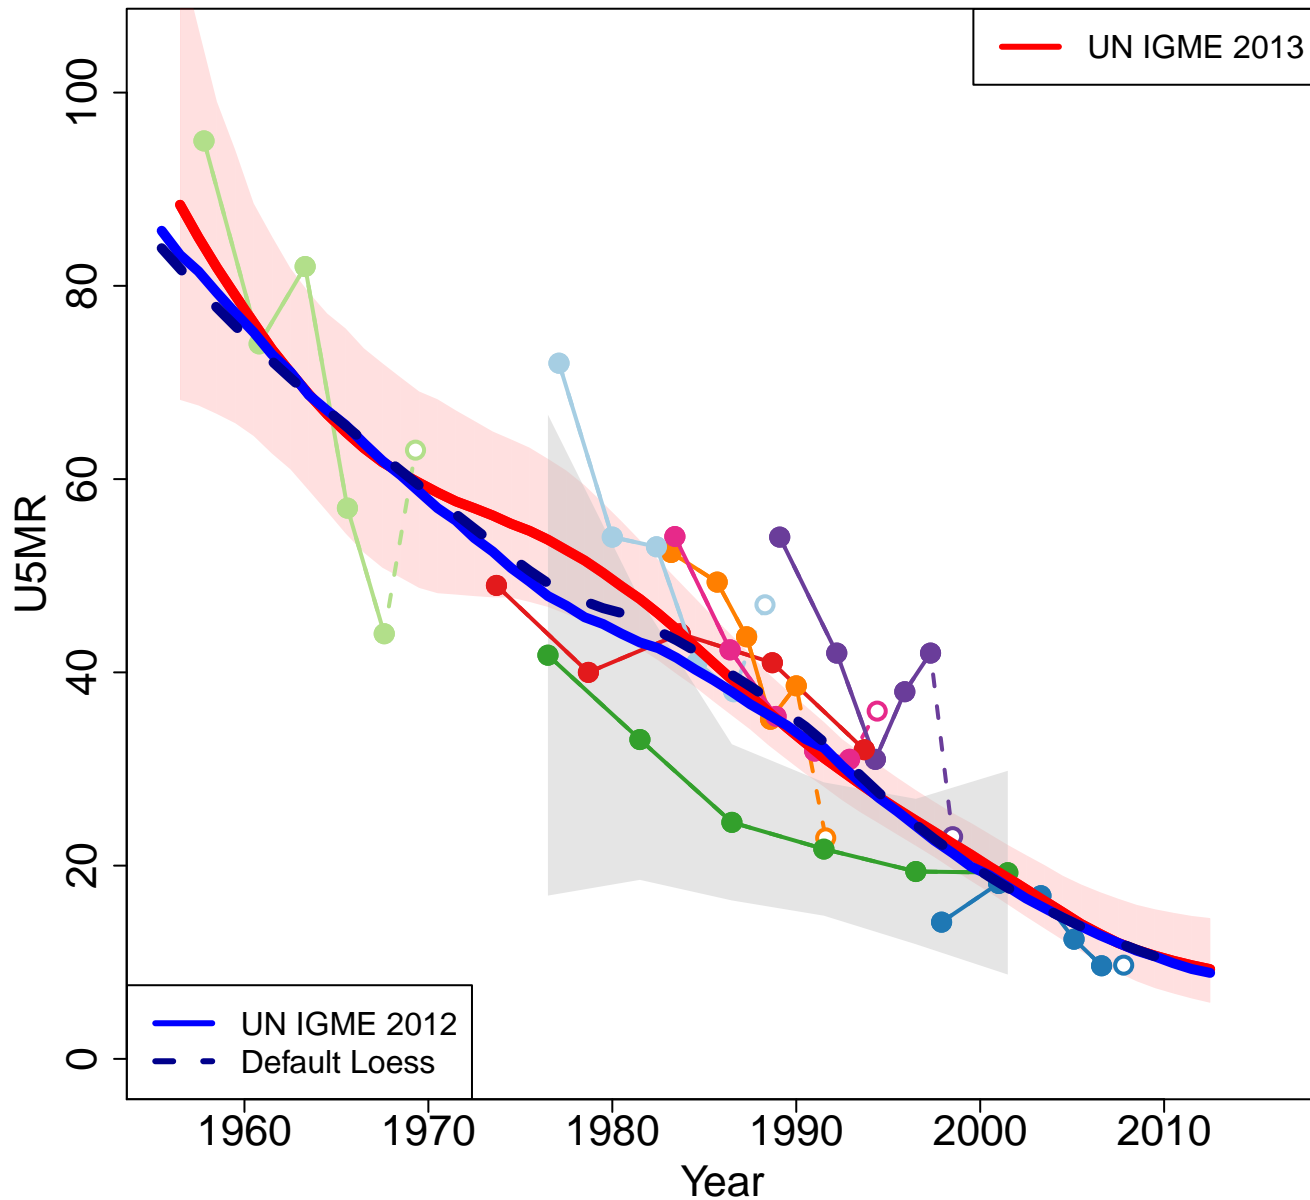

# Zoomed in

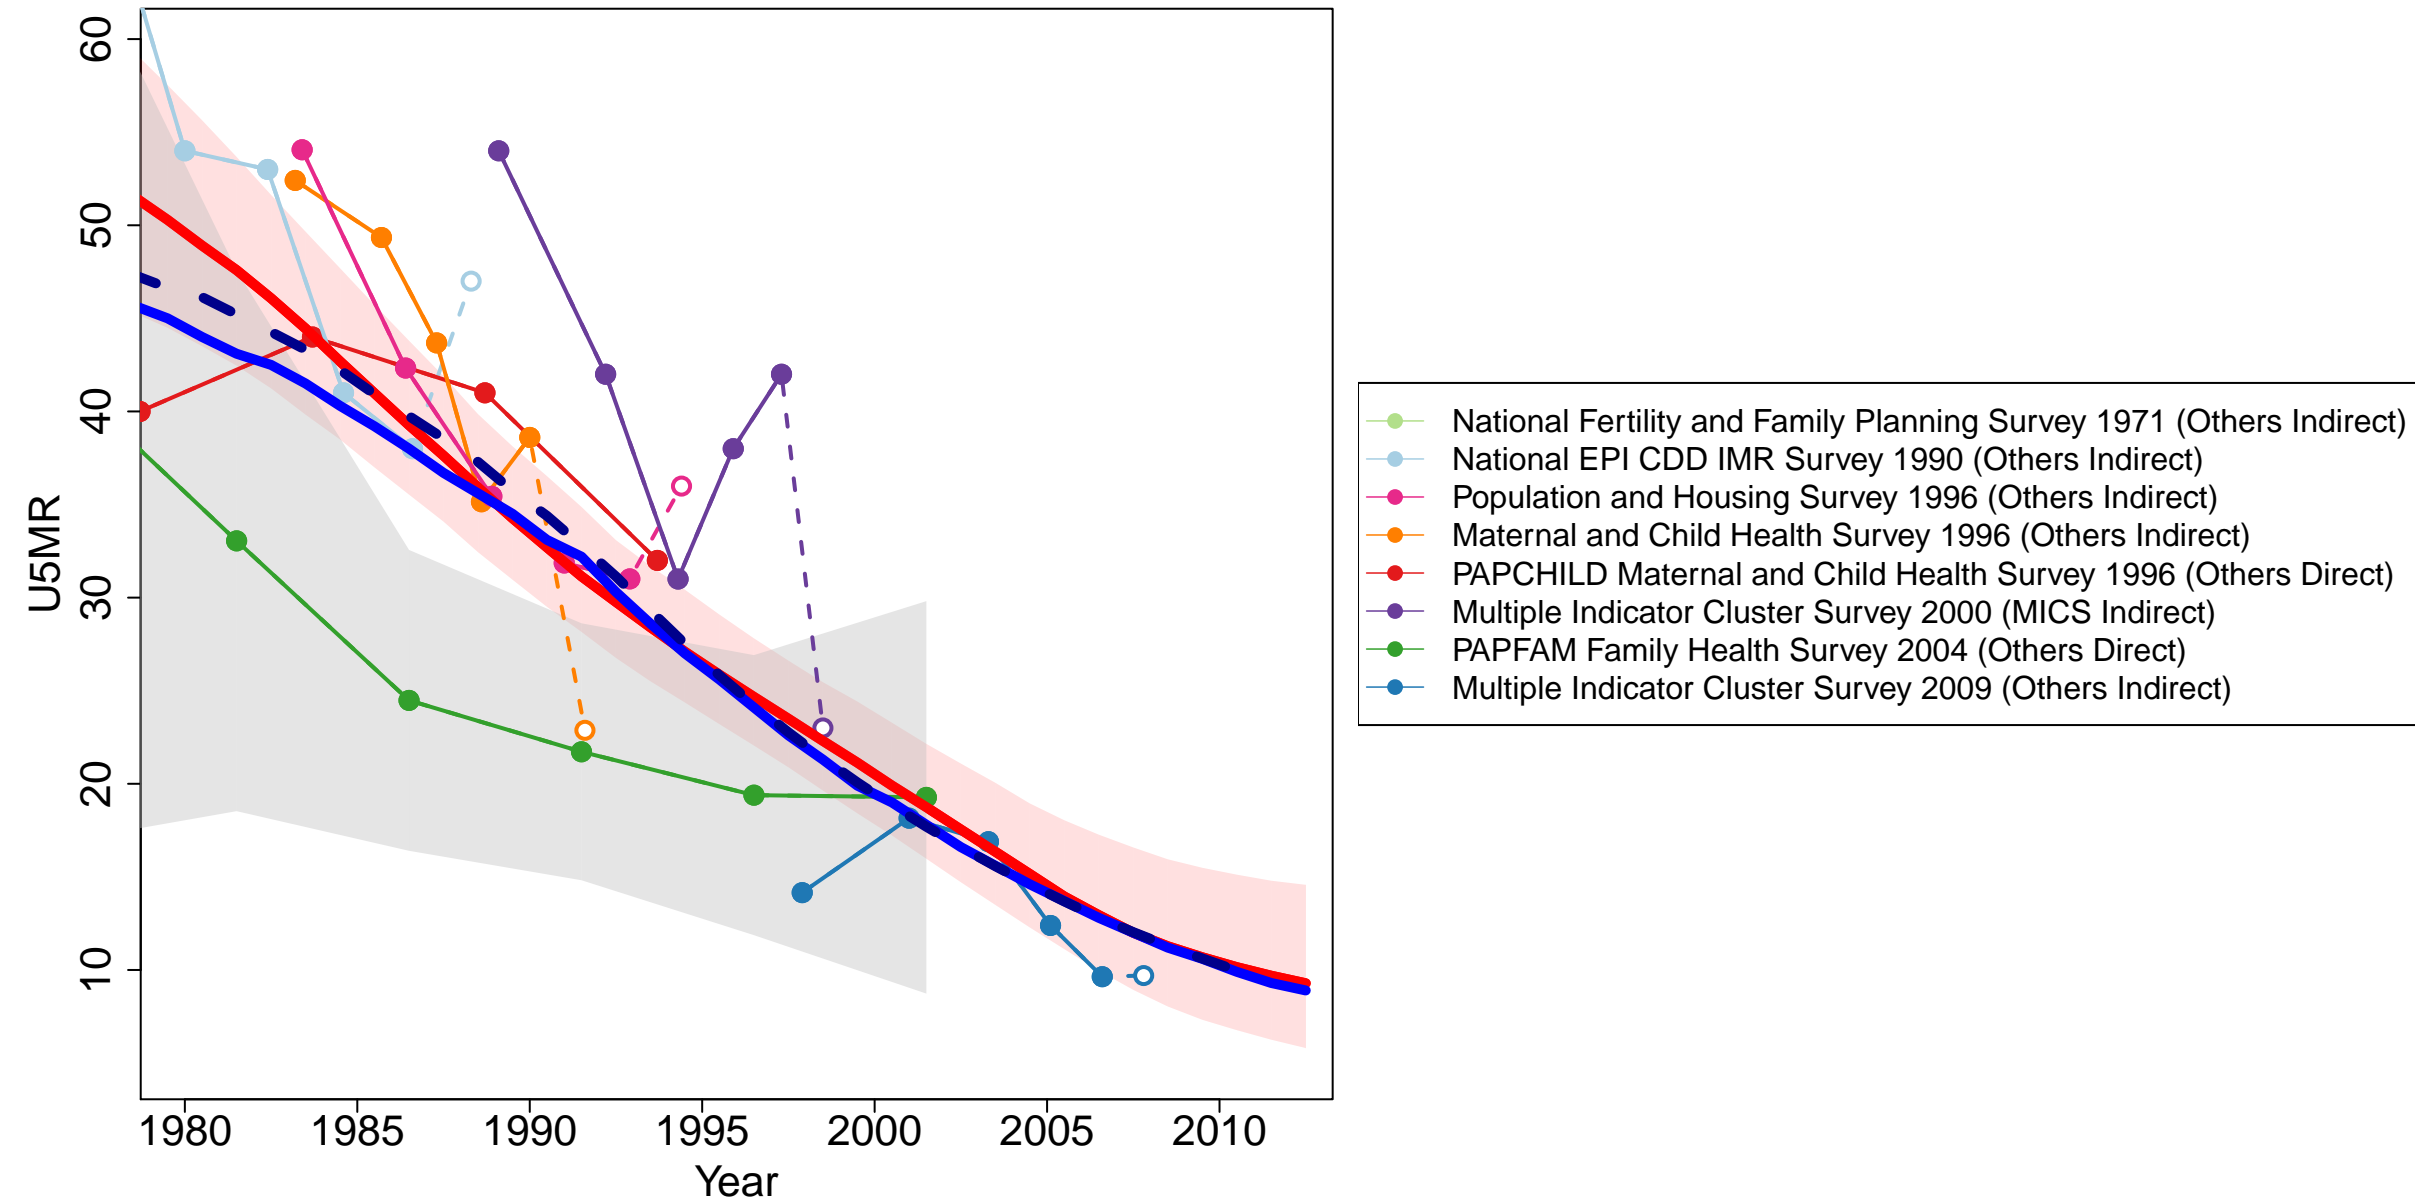

# Liberia

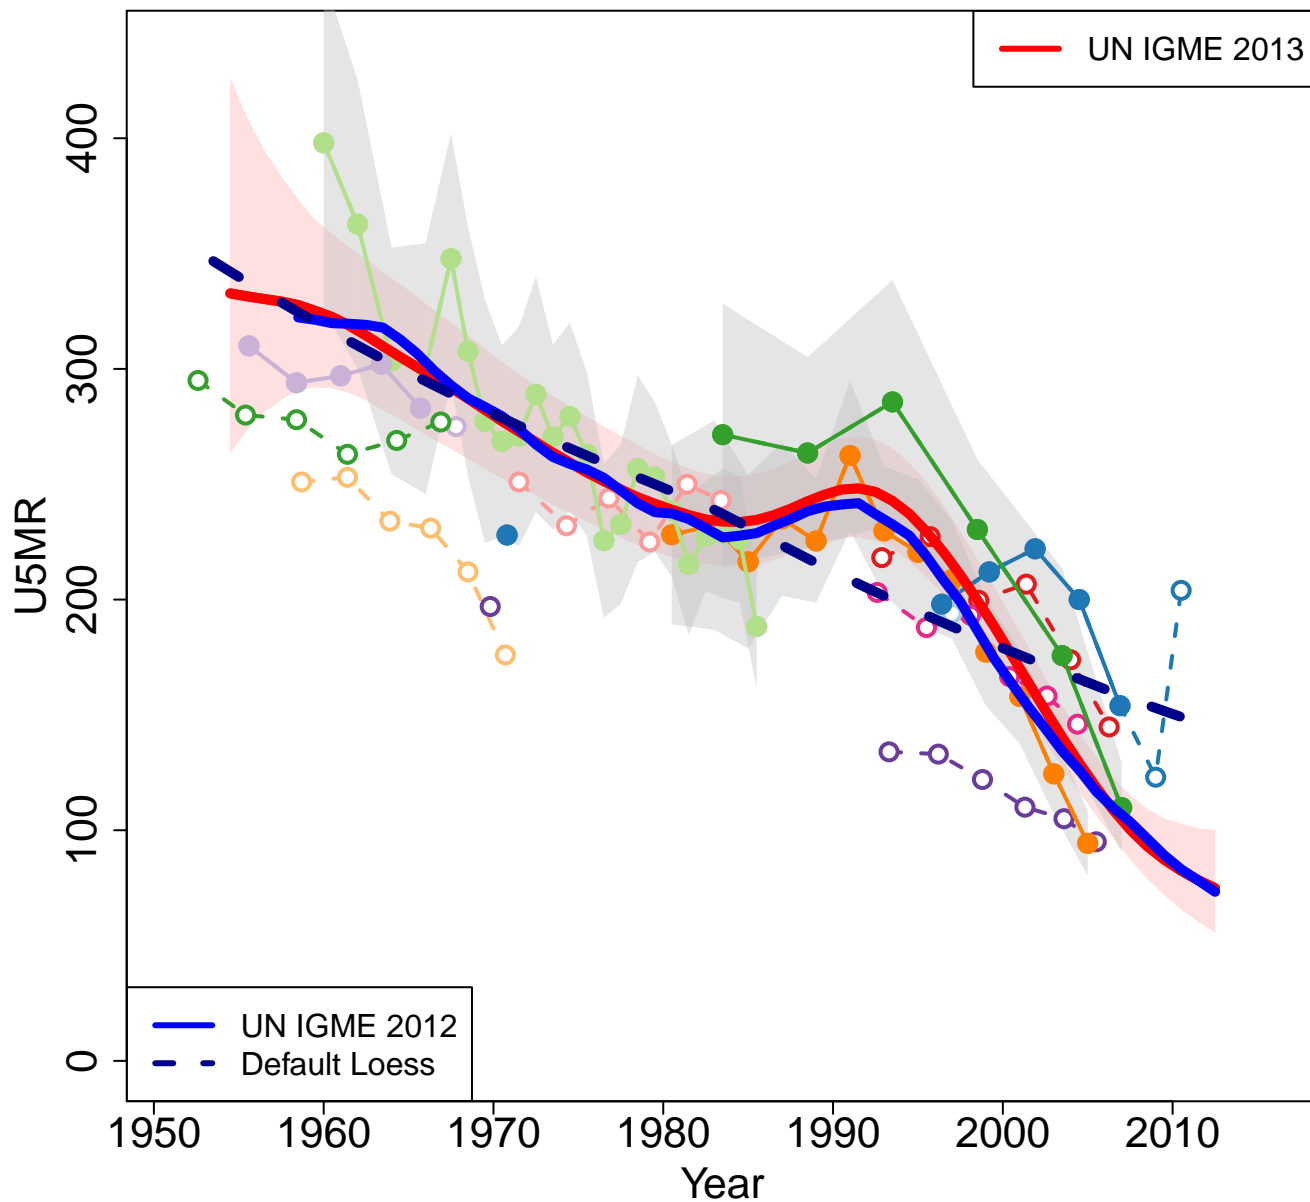

# Zoomed in

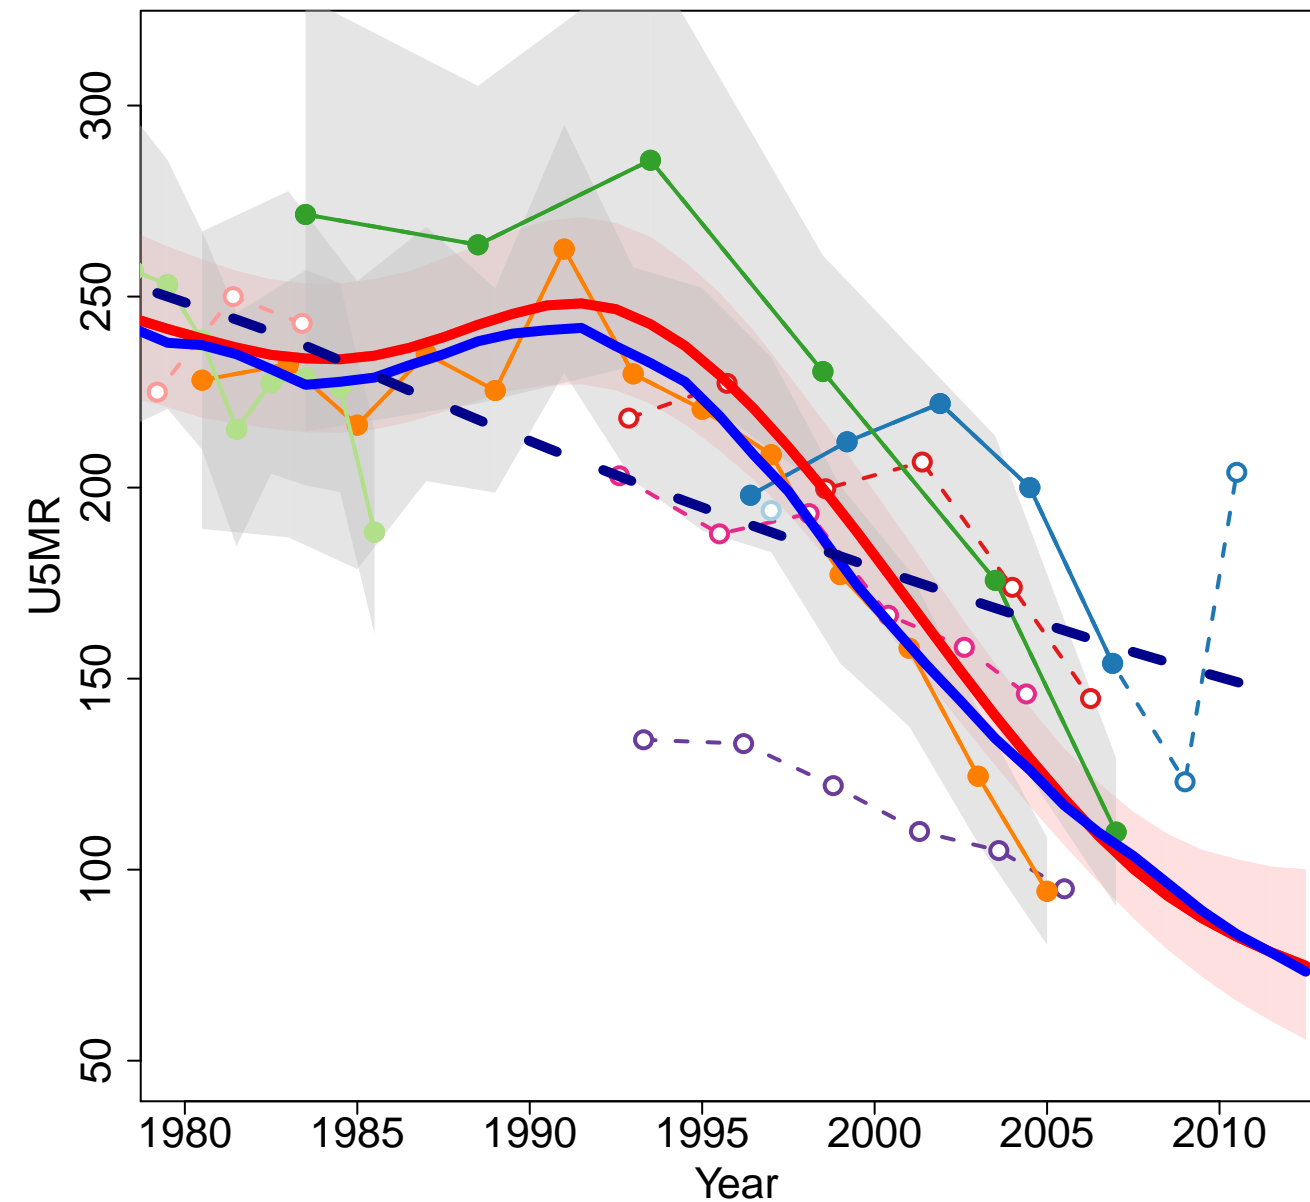

- Population Growth Survey 1969–1970 (Others Direct)
- Population Growth Survey 1969–1970 (Others Indirect)
- Population Growth Survey 1970–1971 (Others Direct)
- Population Growth Survey 1970–1971 (Others Indirect)
- Census 1974 (Census Indirect)
- Demographic and Health Survey 1986 (DHS Indirect)
- Demographic and Health Survey 1986 (DHS Direct)
- LDHS 1999–2000 (Other DHS Direct)
- Demographic and Health Survey 2006–2007 (DHS Indirect)
- Demographic and Health Survey 2006–2007 (DHS Direct)
- Malaria Indicator Survey 2008–2009 (Other DHS Indirect)
- Population and Housing Census 2008 (Census Indirect)
- Malaria Indicator Survey 2008–2009 (Other DHS Direct)
- Malaria Indicator Survey 2011 (Other DHS Indirect)

# Libya

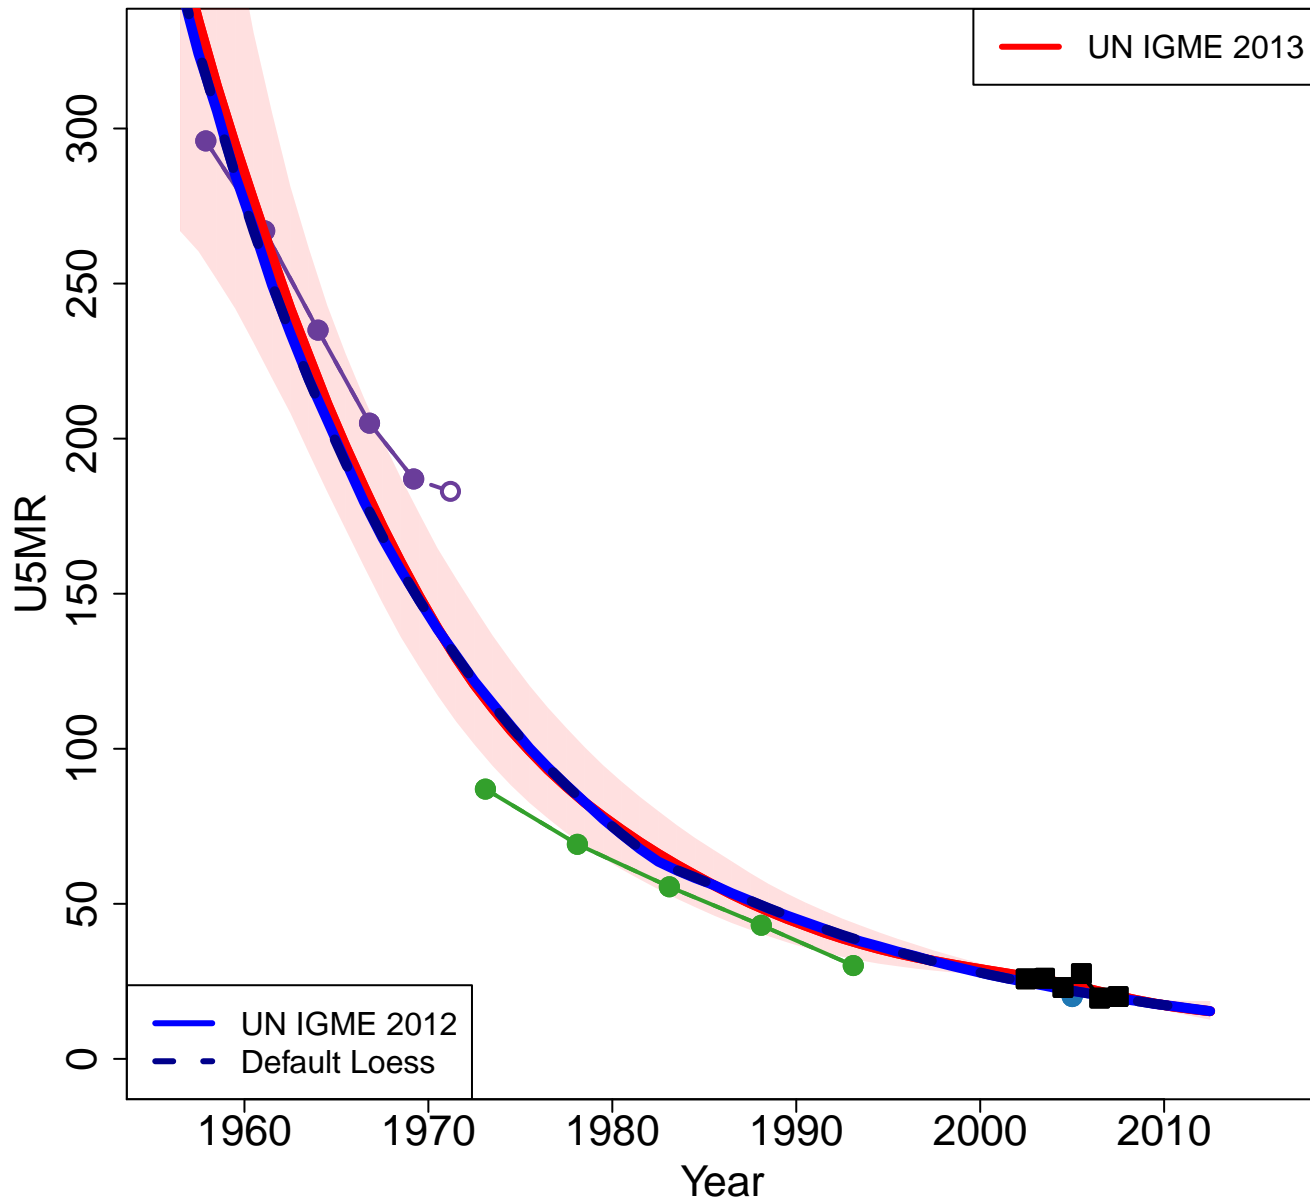

# Zoomed in

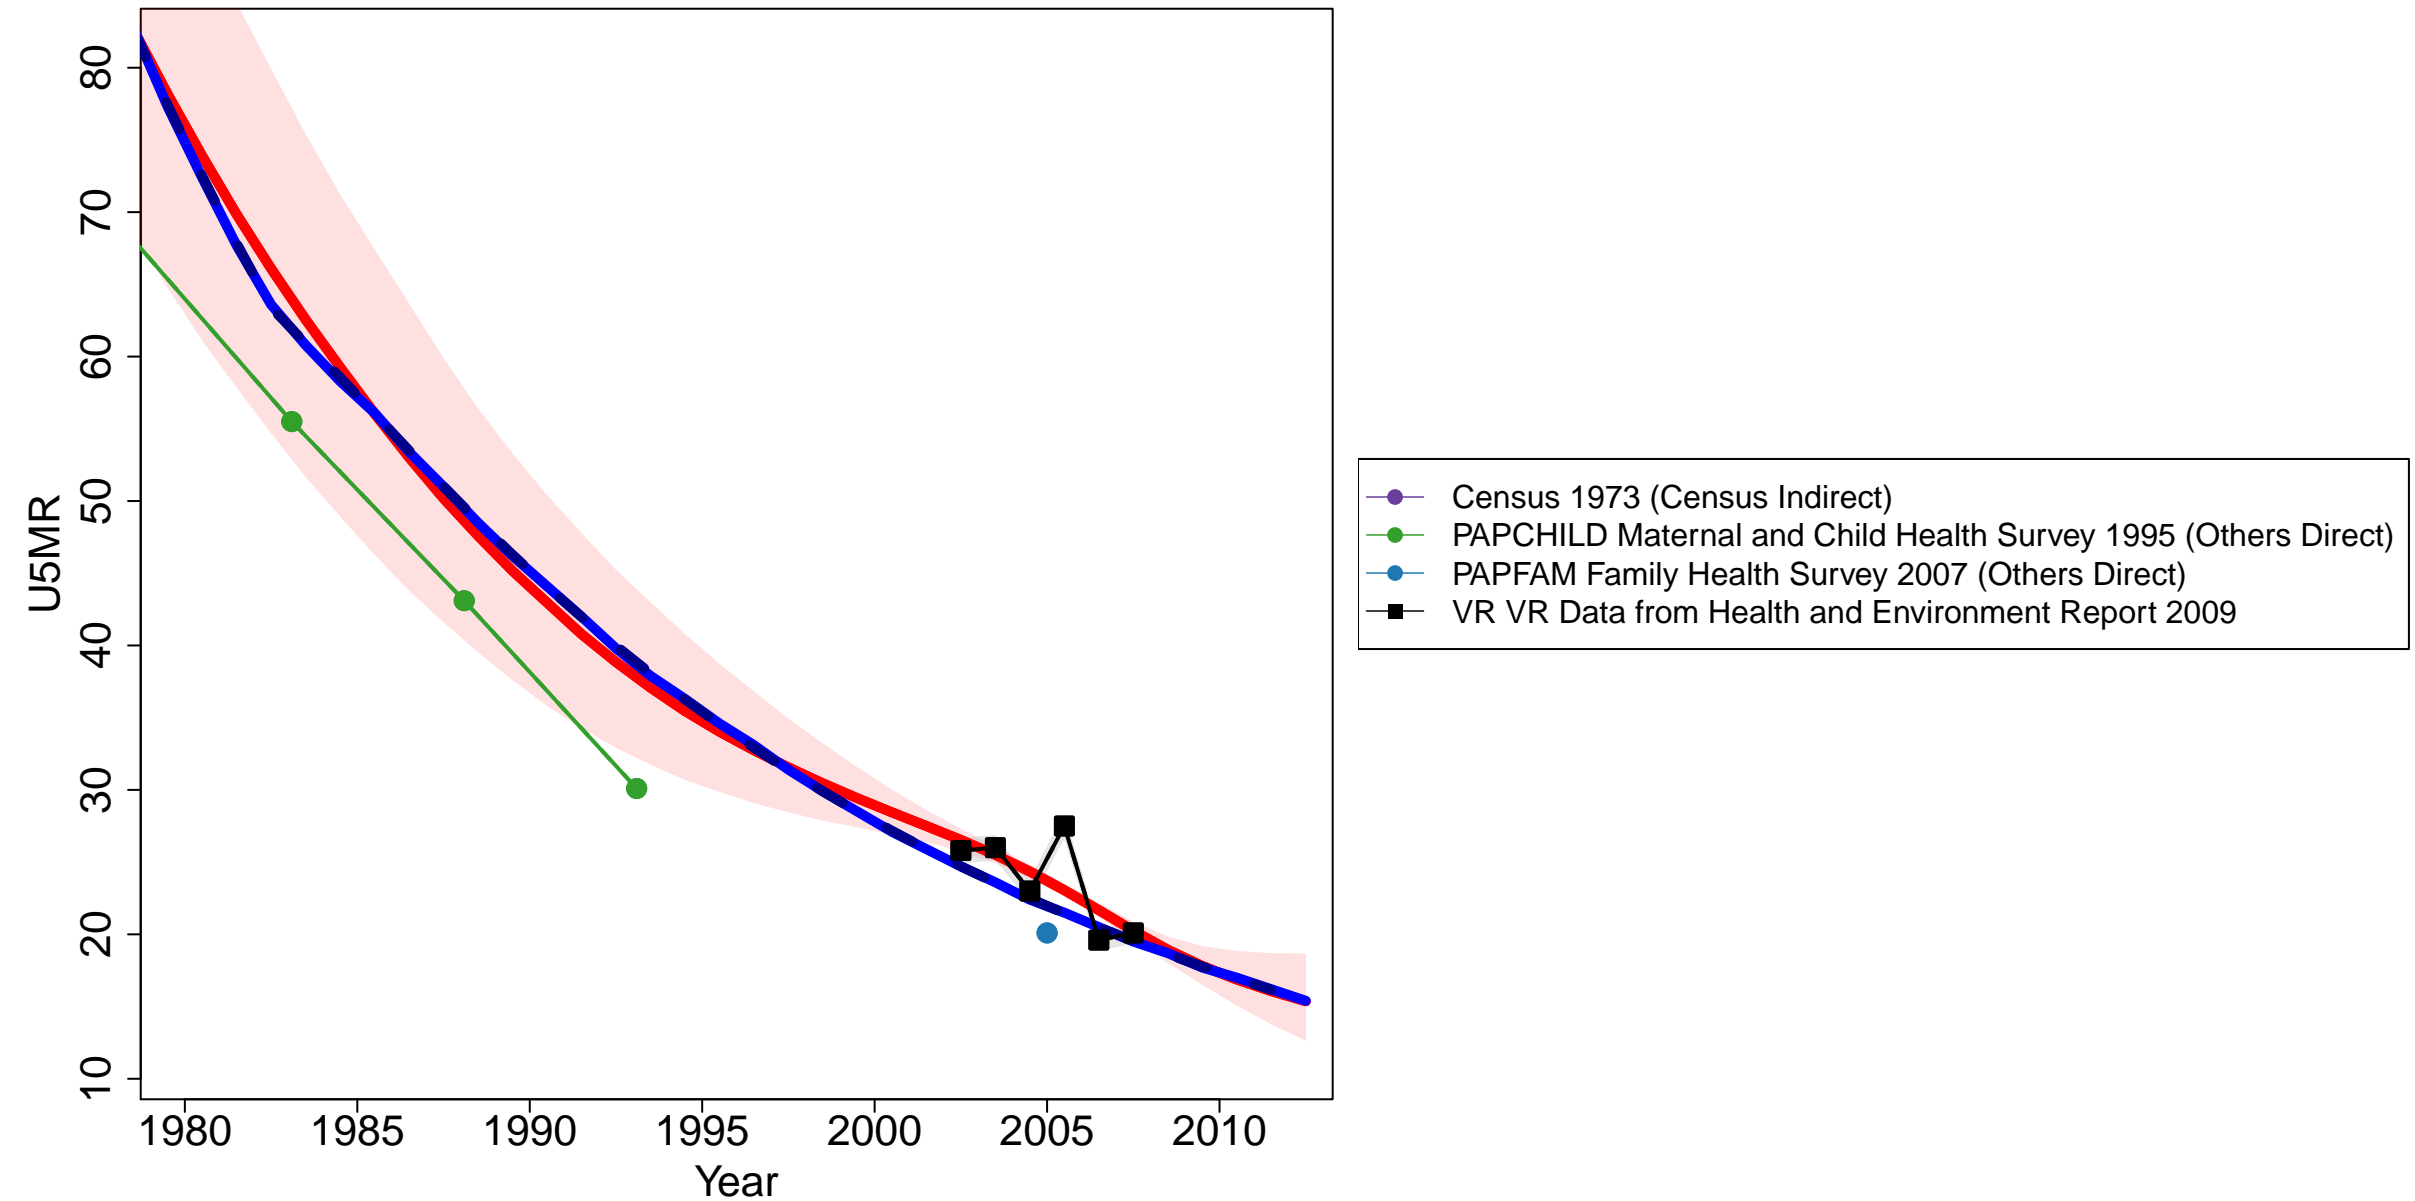

# Madagascar

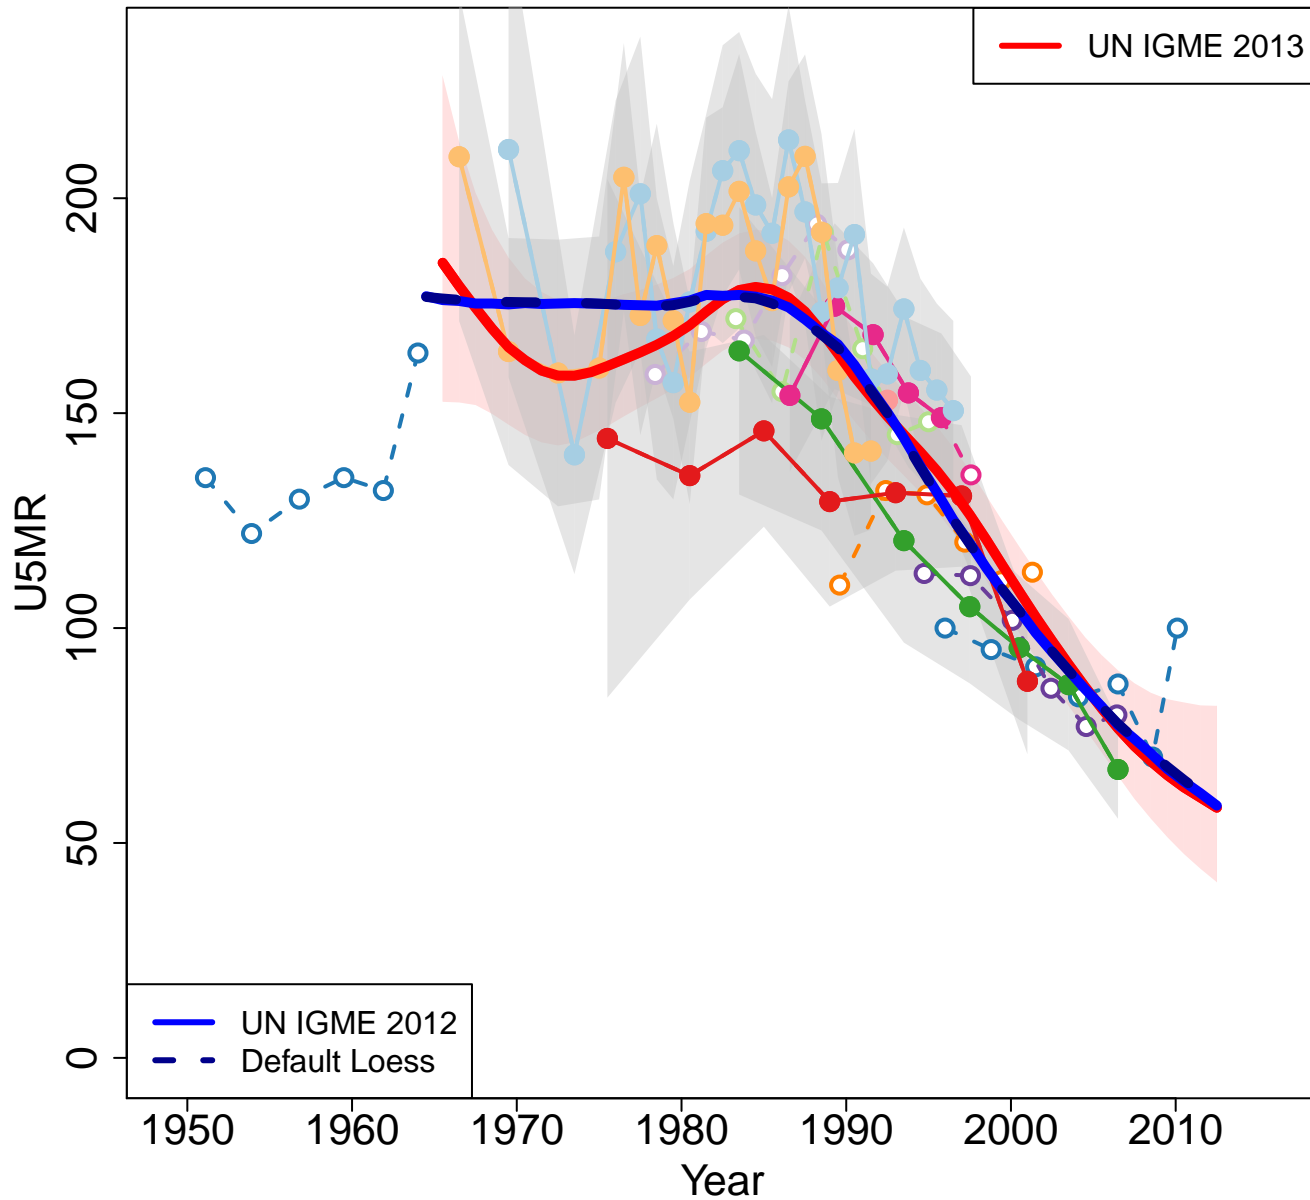

# Zoomed in

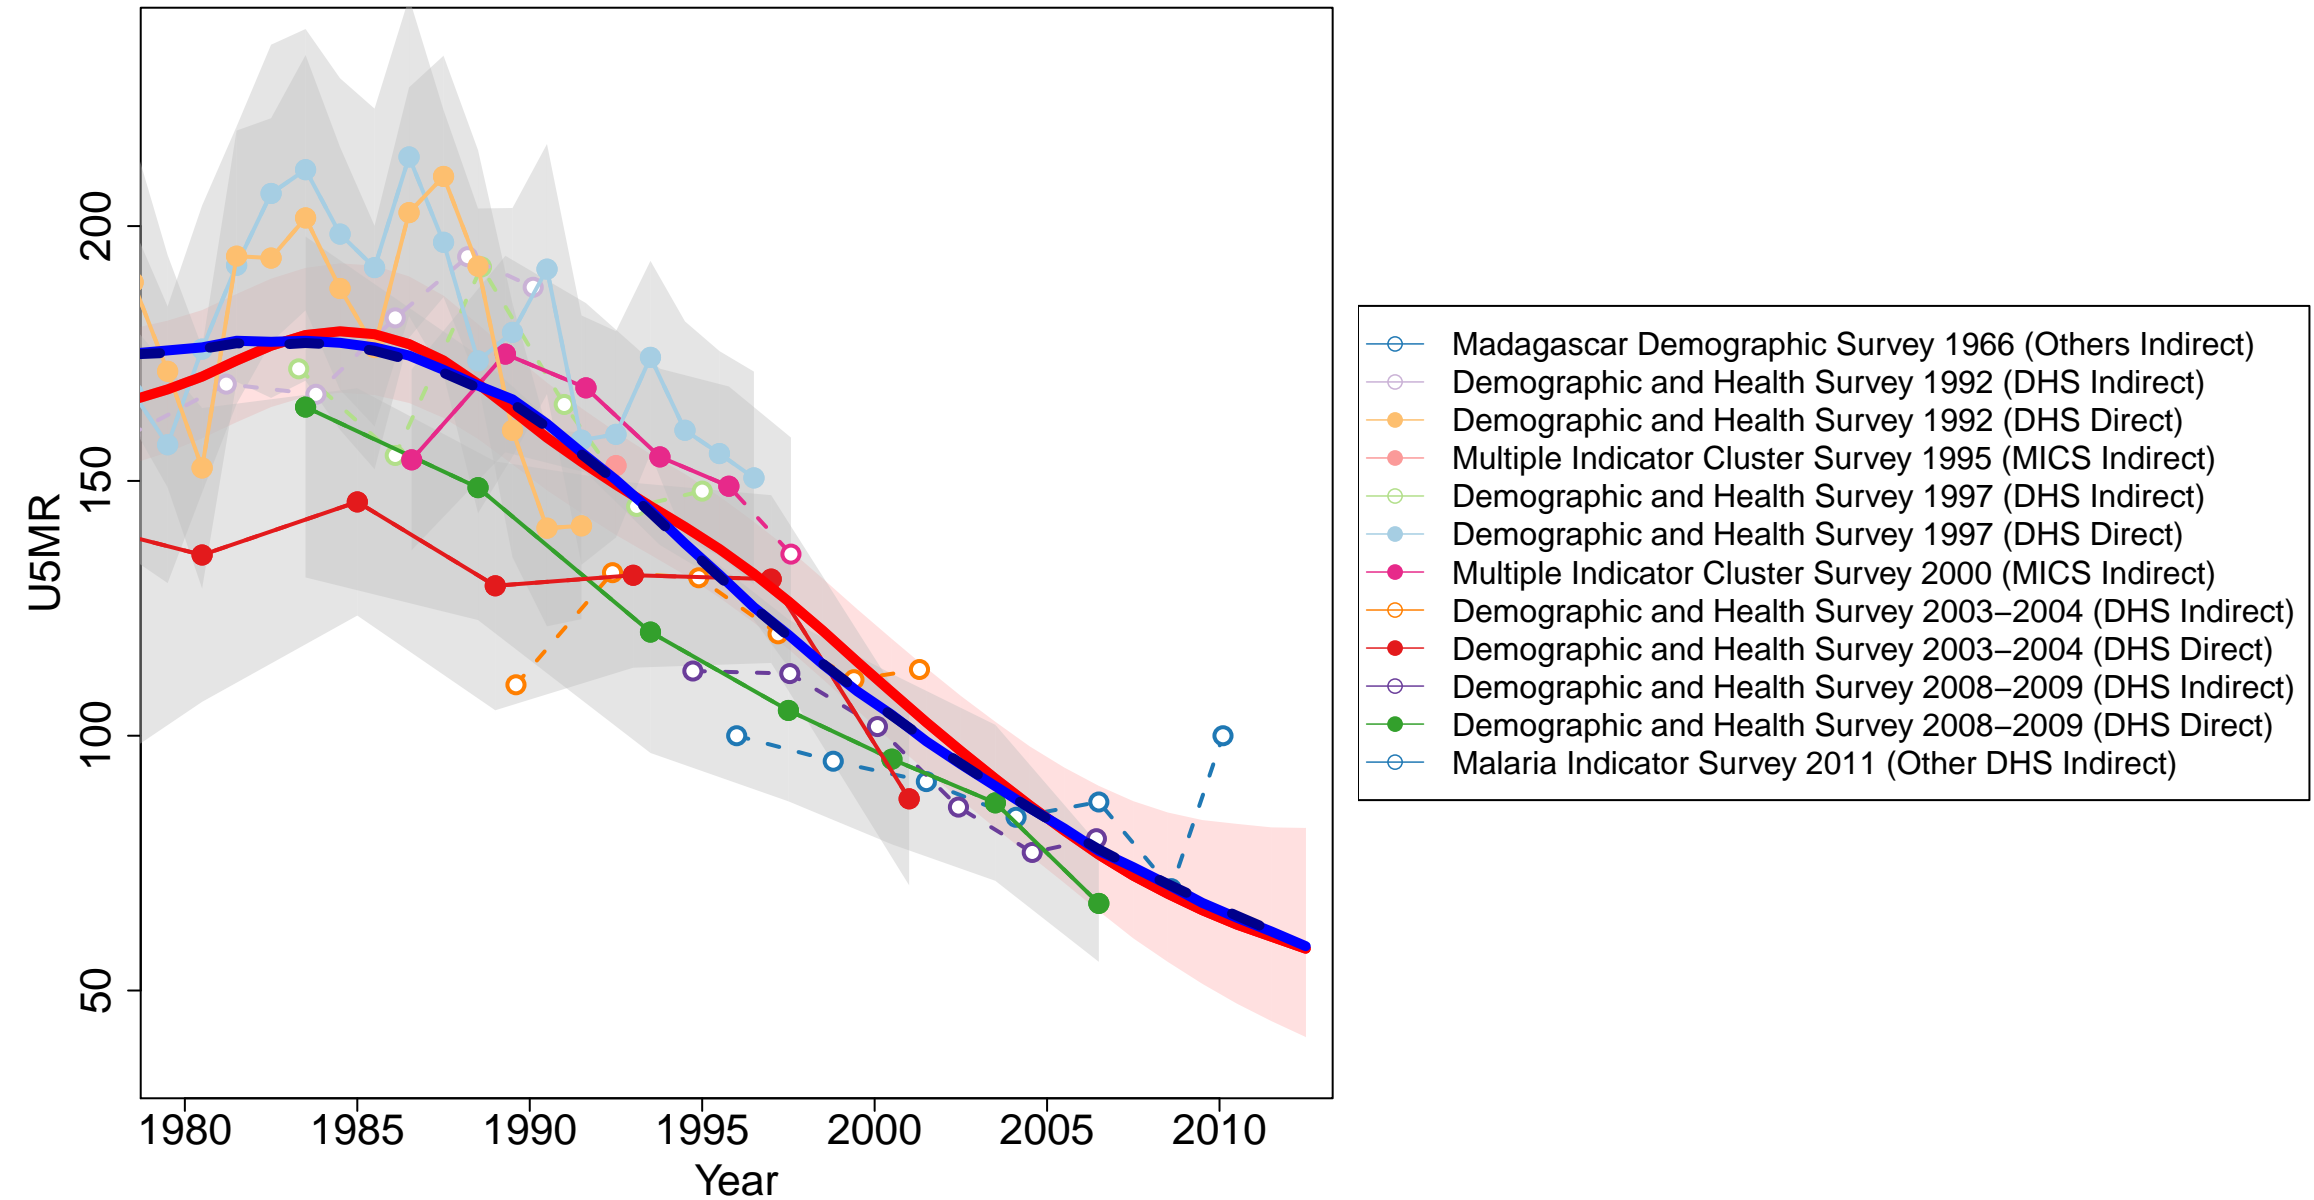

Malaysia

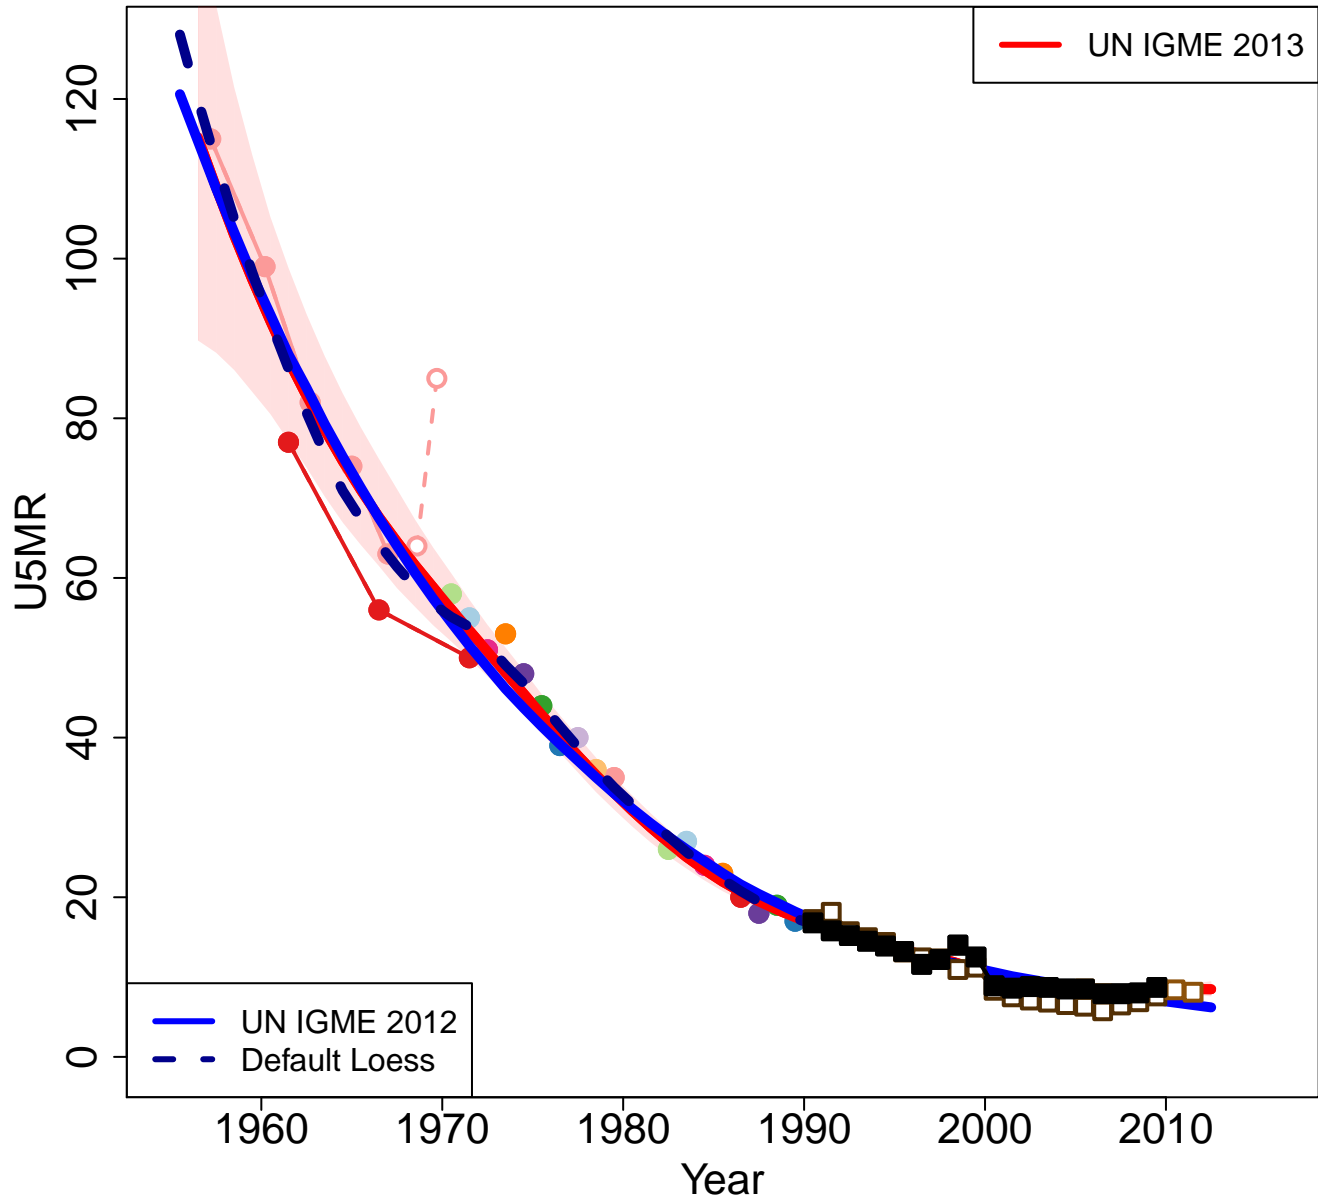

Zoomed in

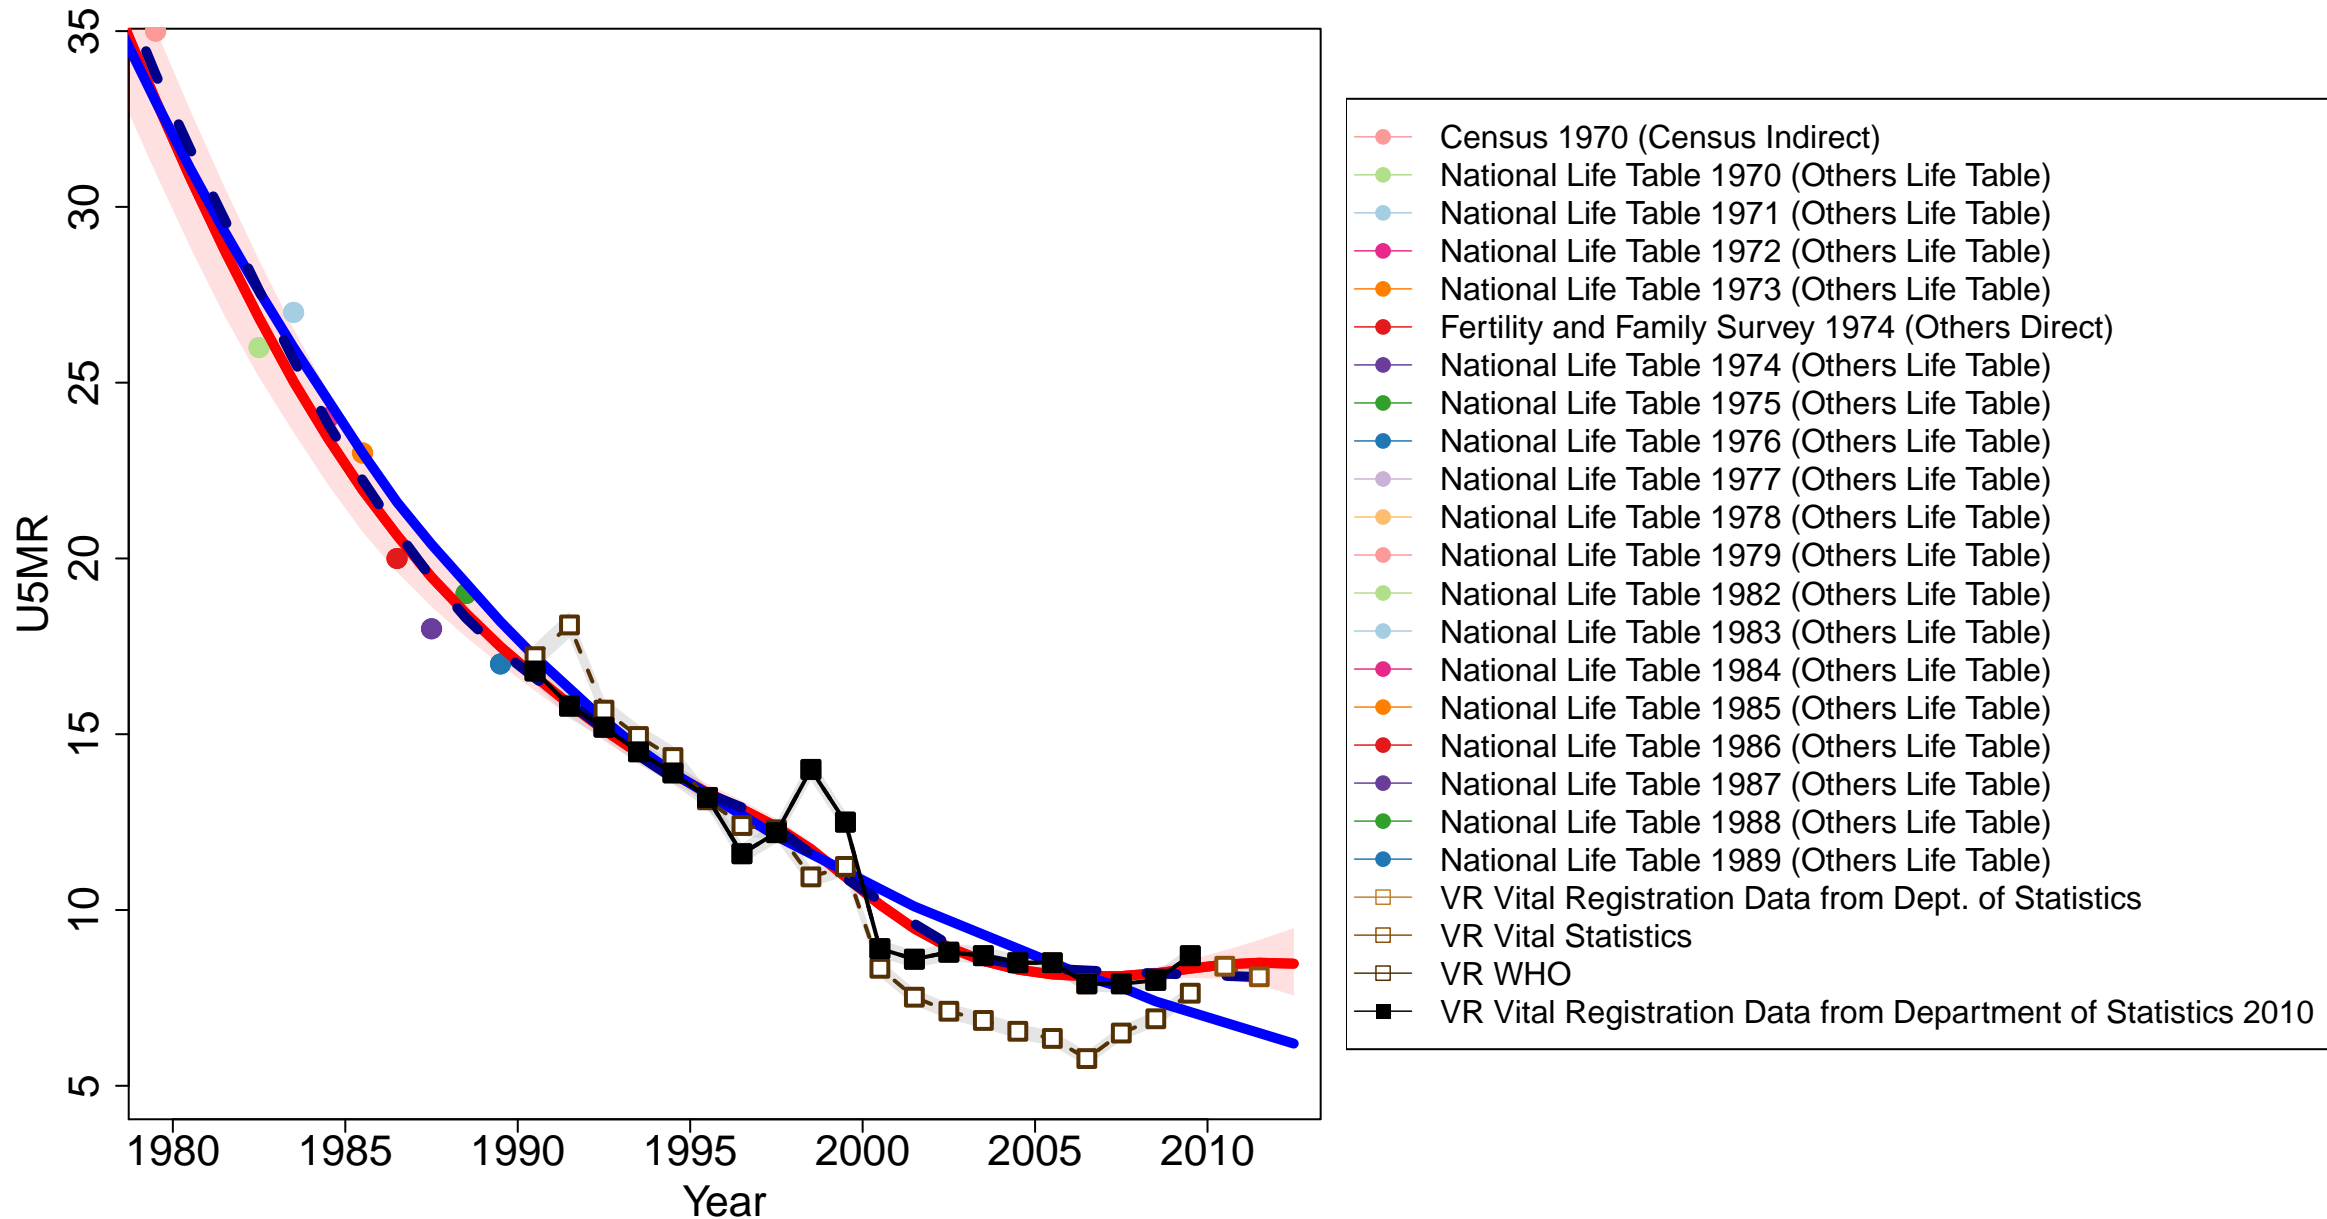

# Maldives

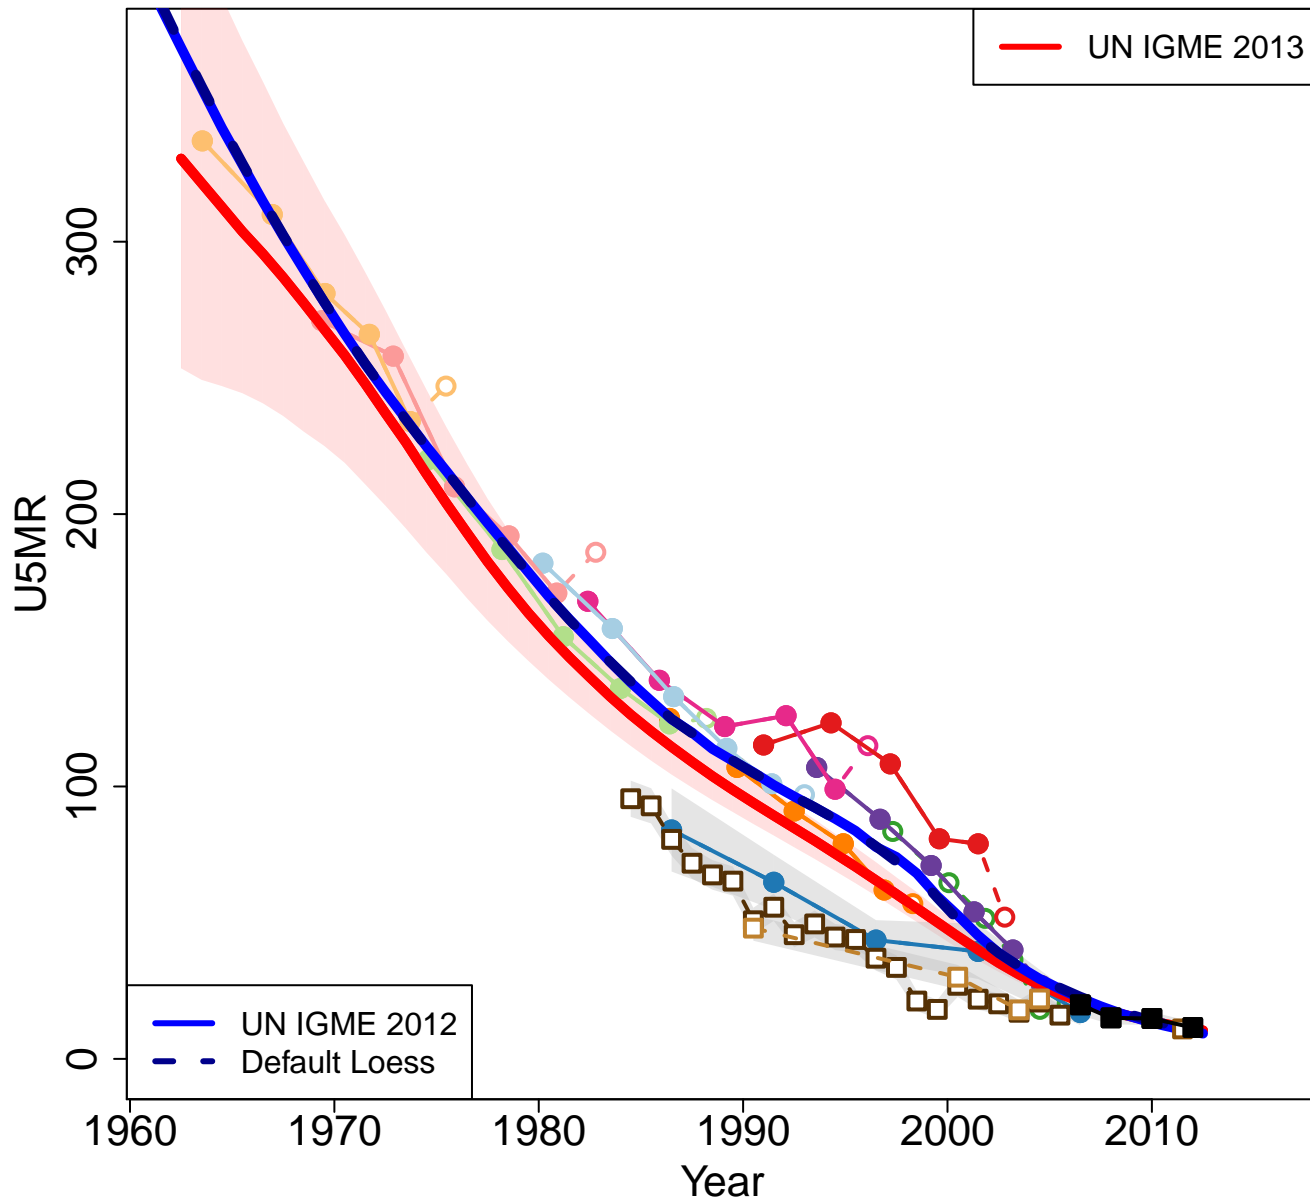

# Zoomed in

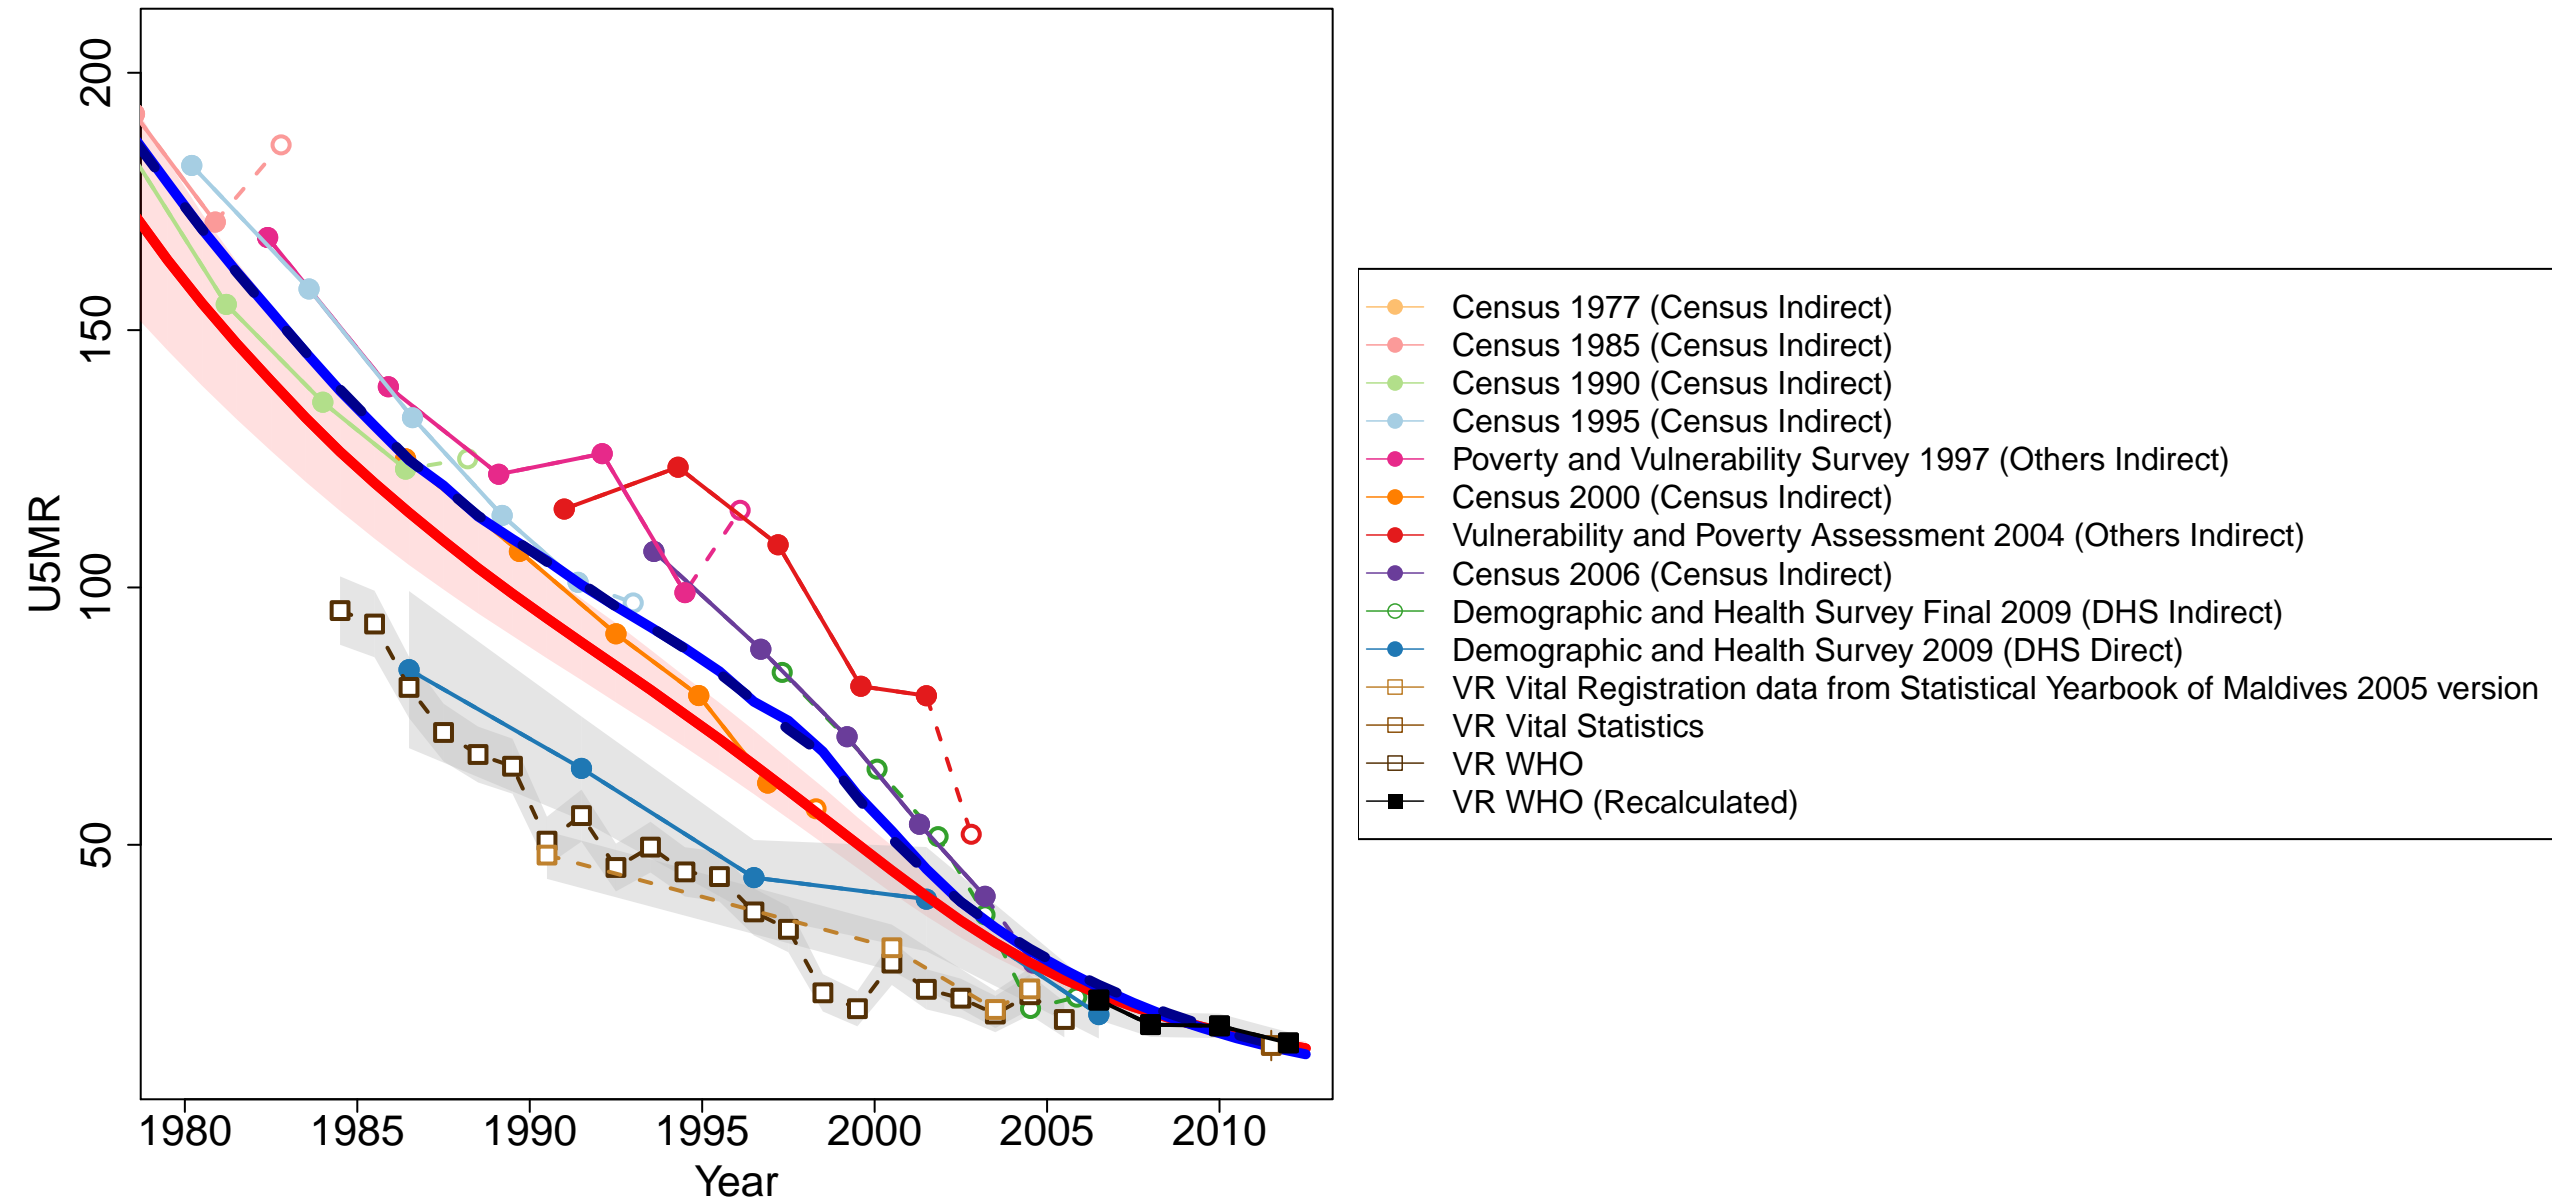



# Mali

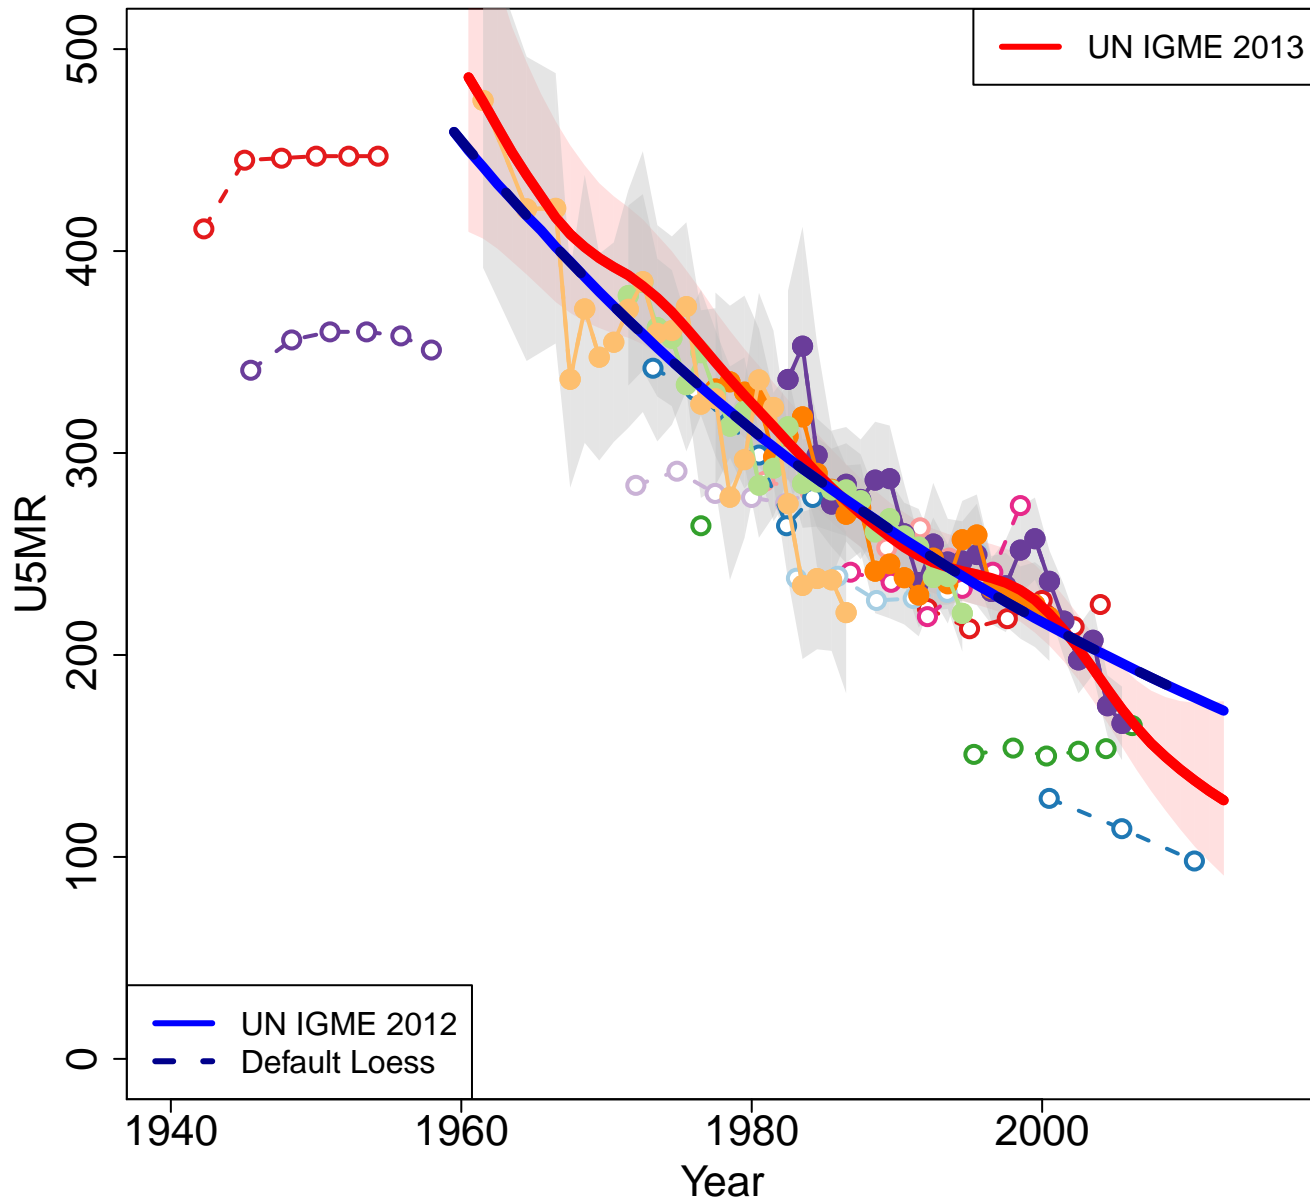

# Zoomed in

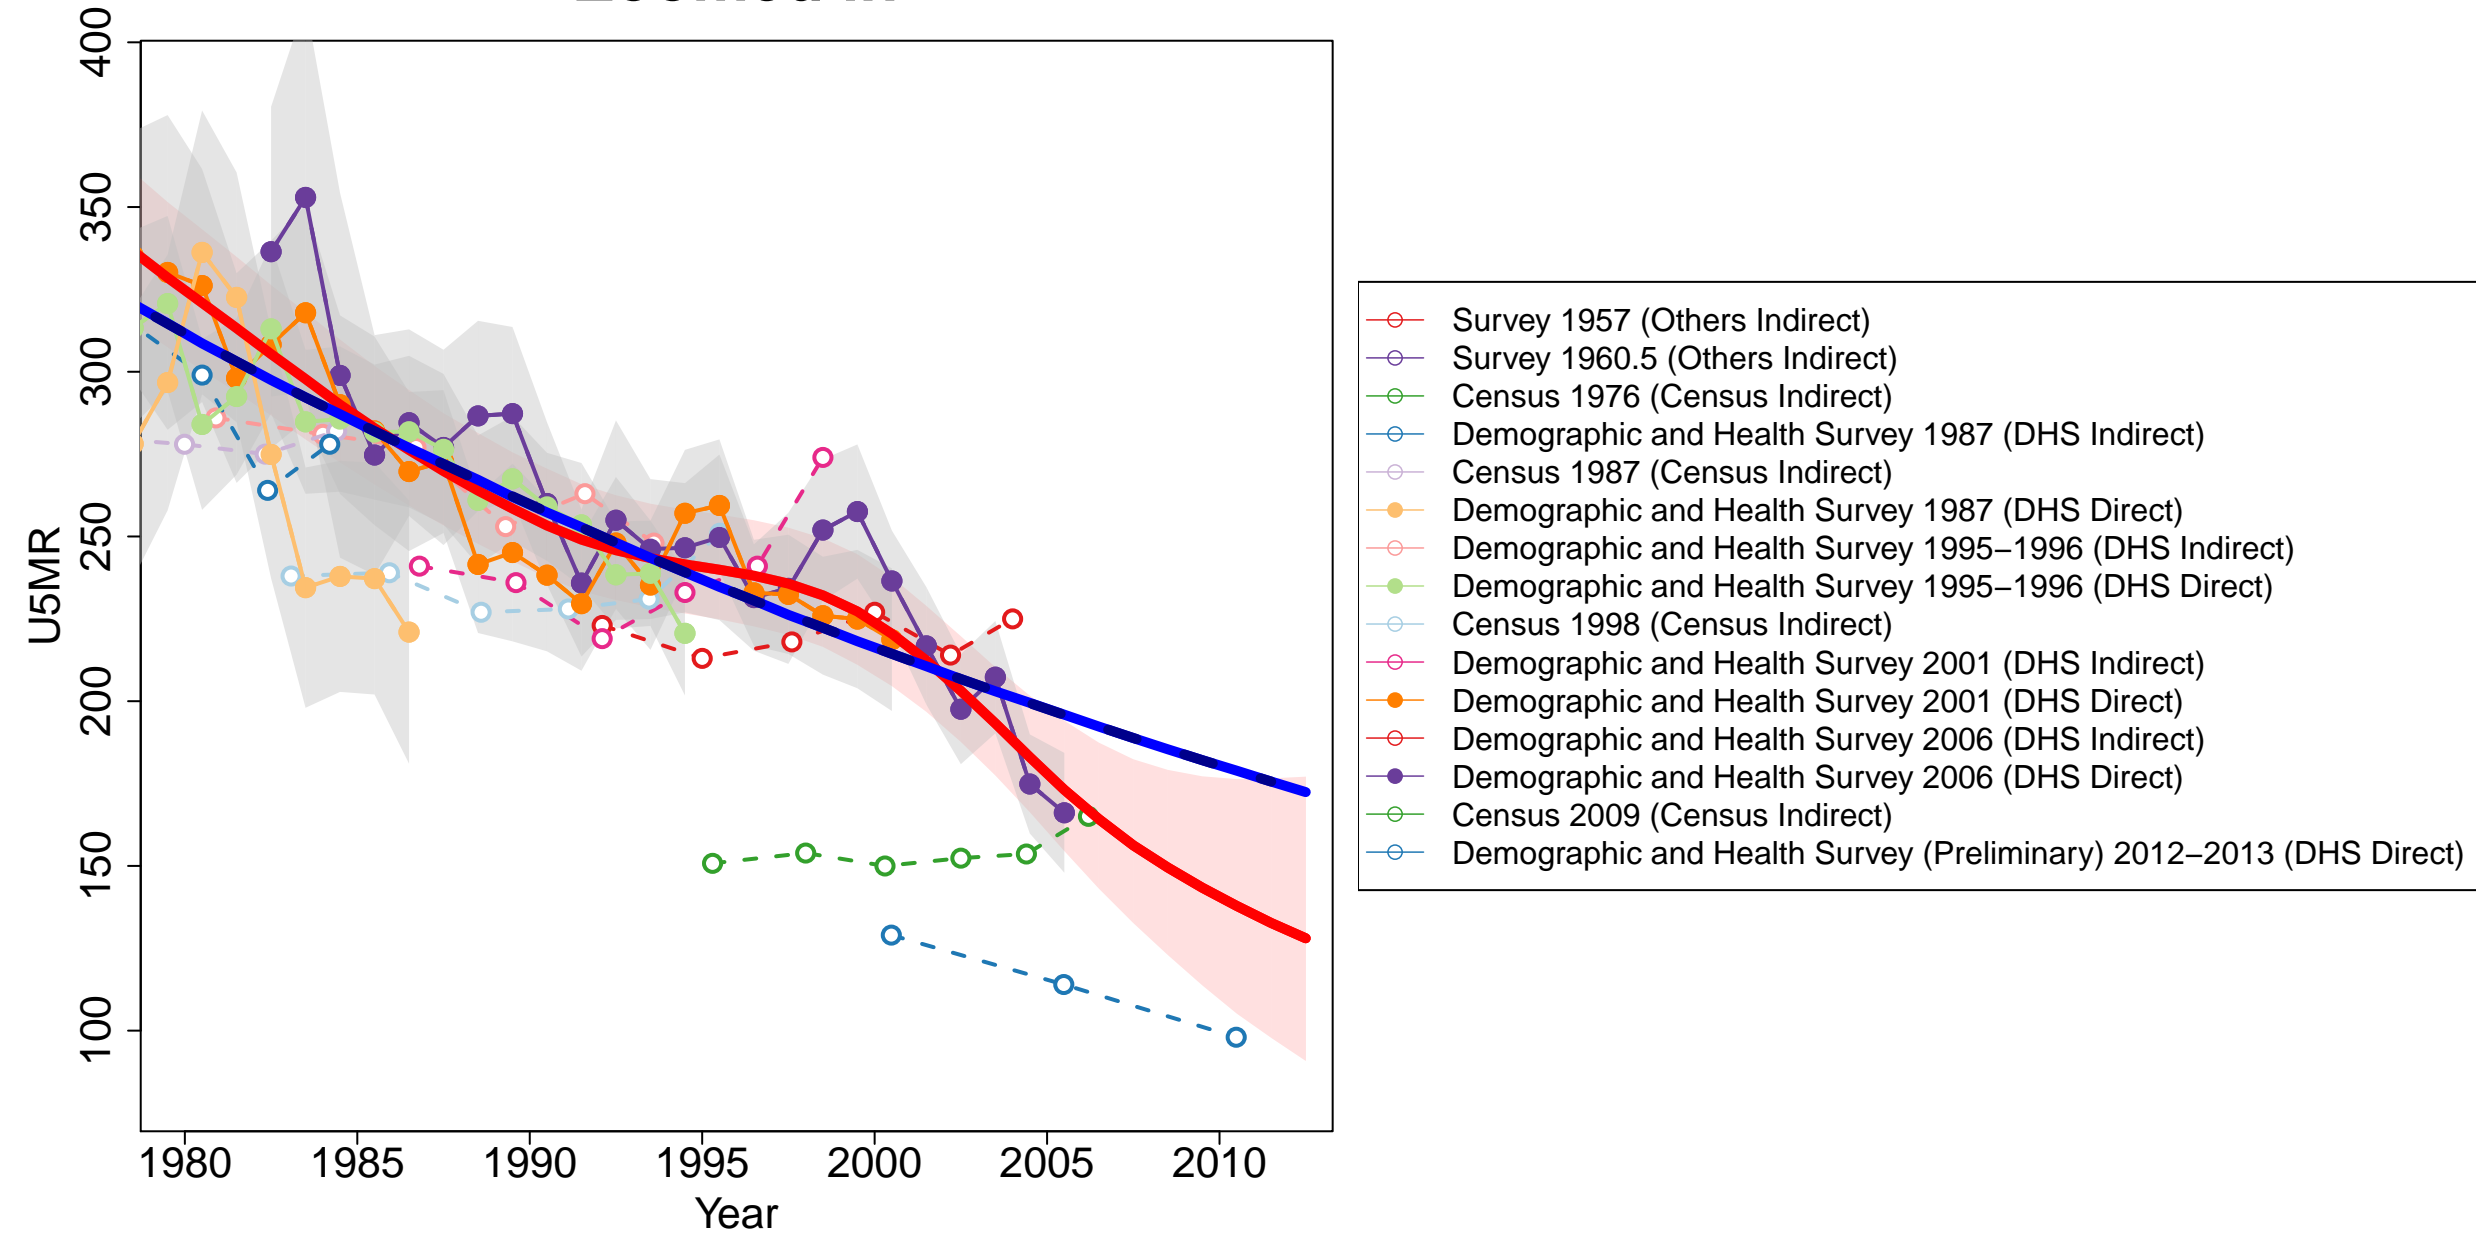

# Marshall Islands

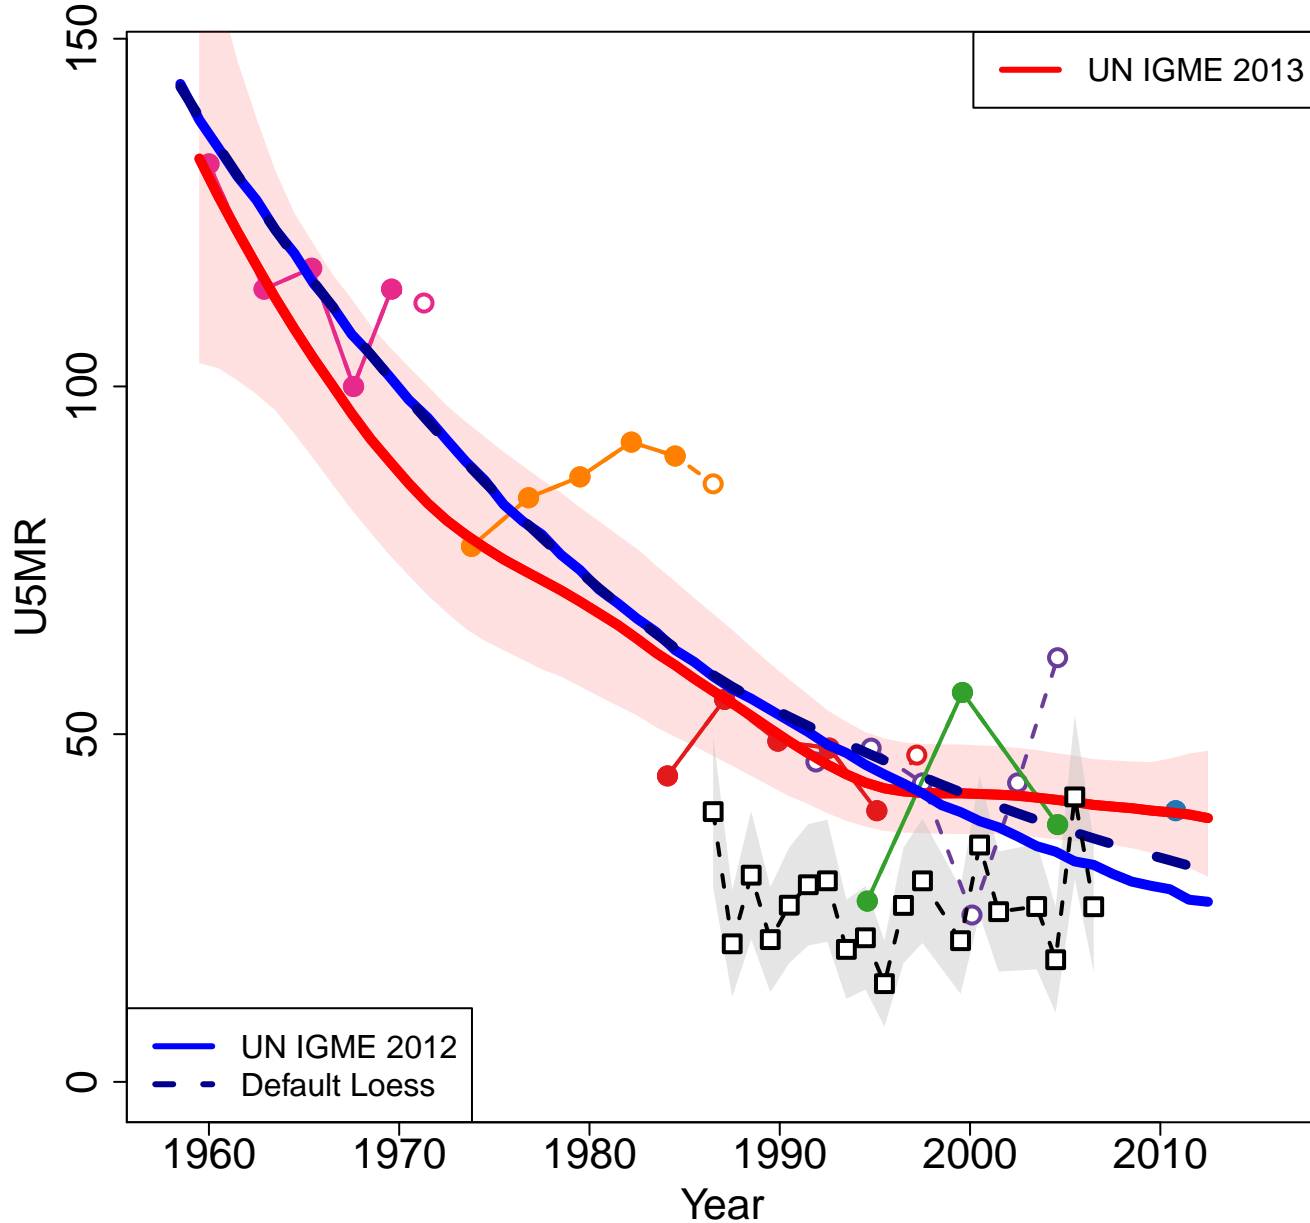

# Zoomed in

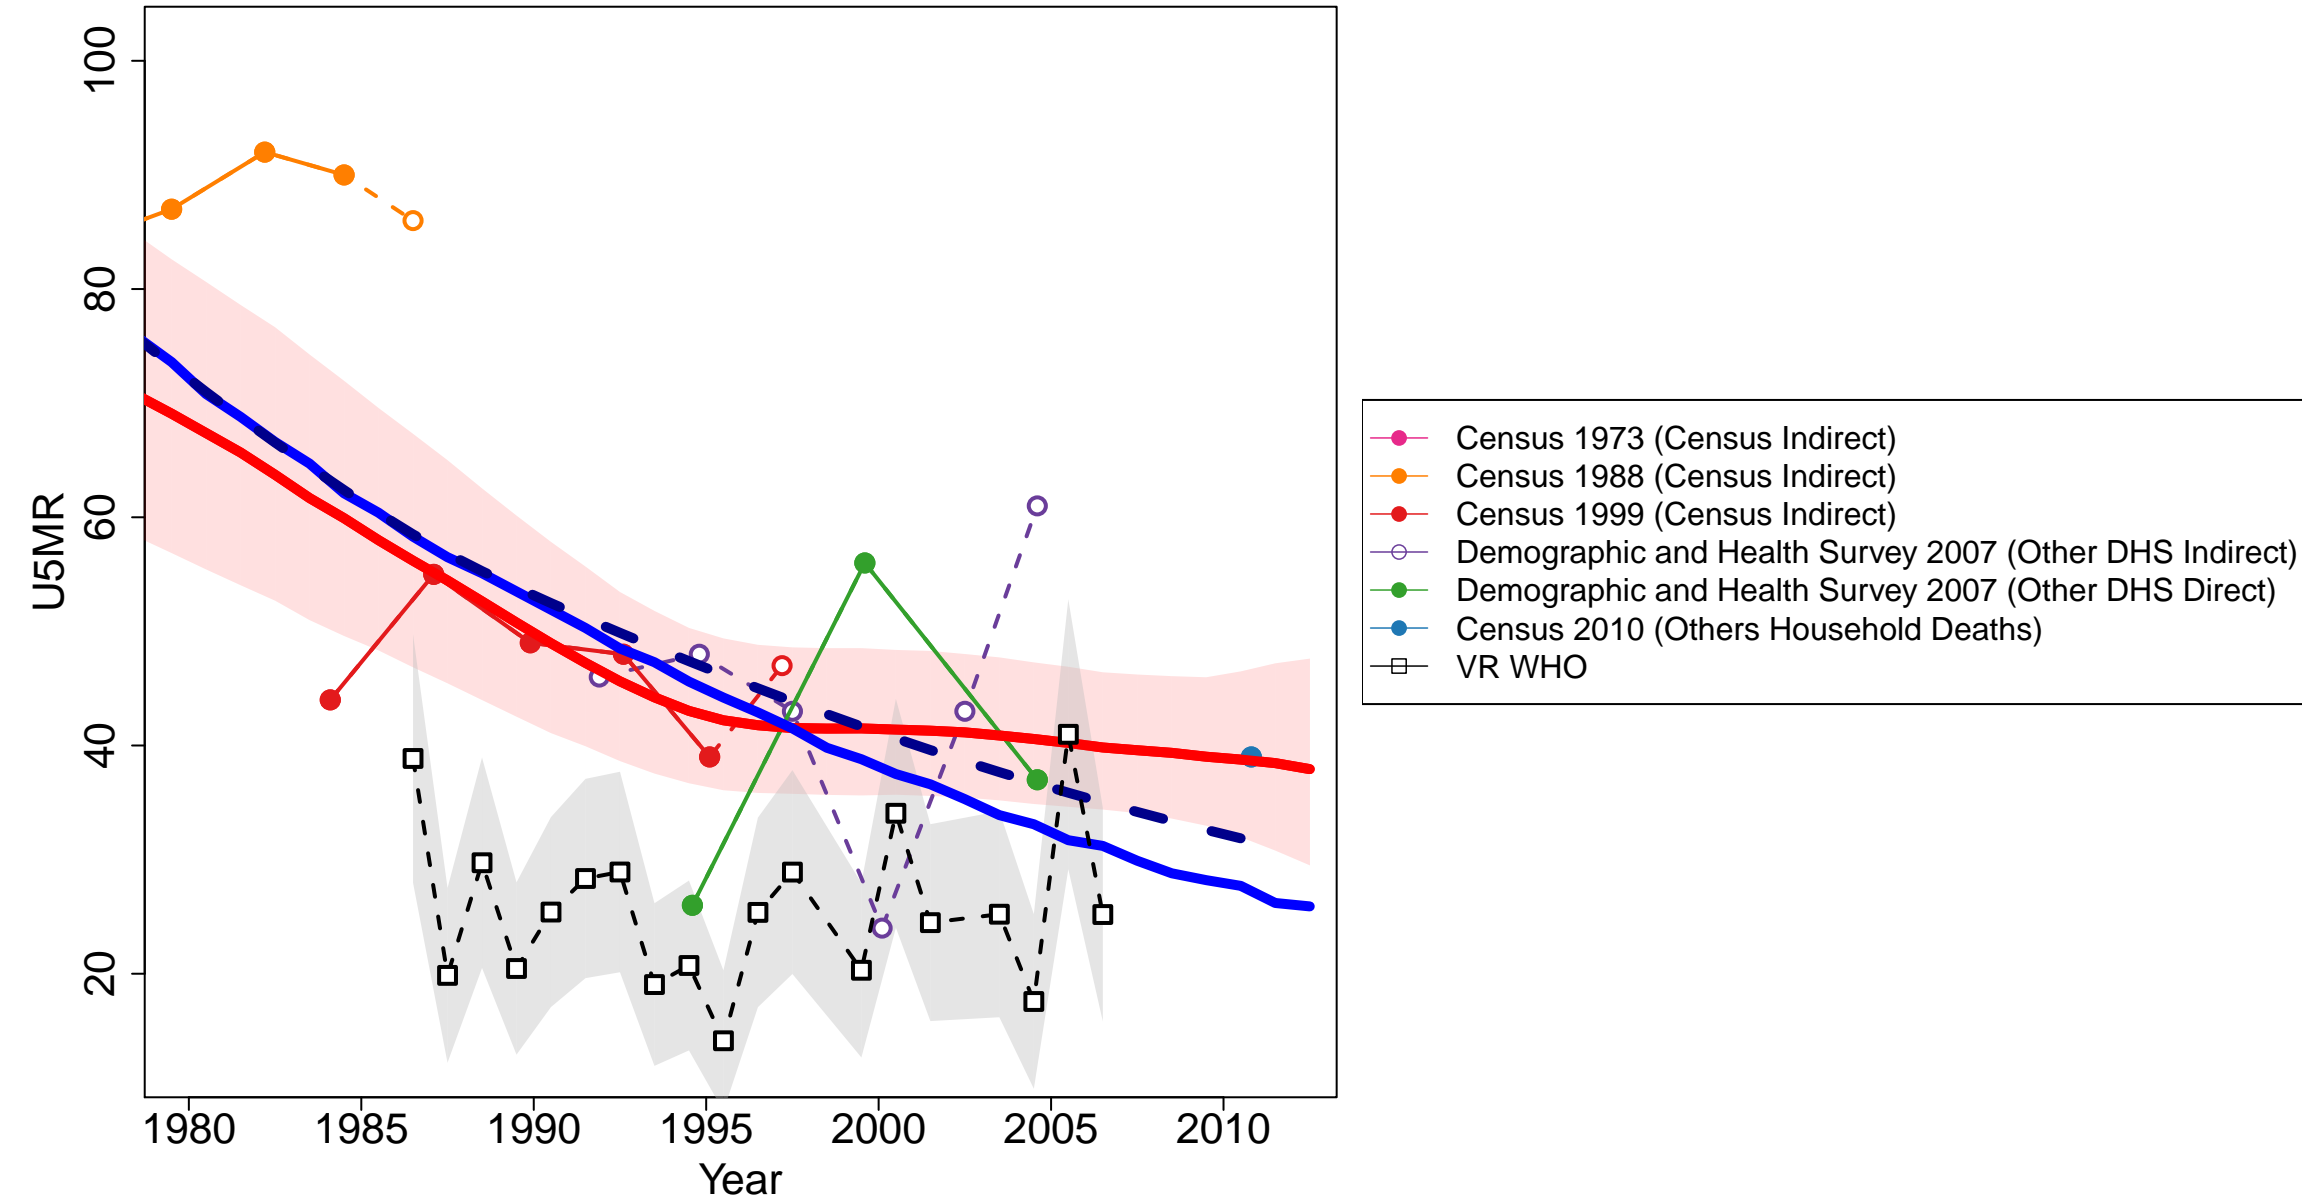

# Mauritania

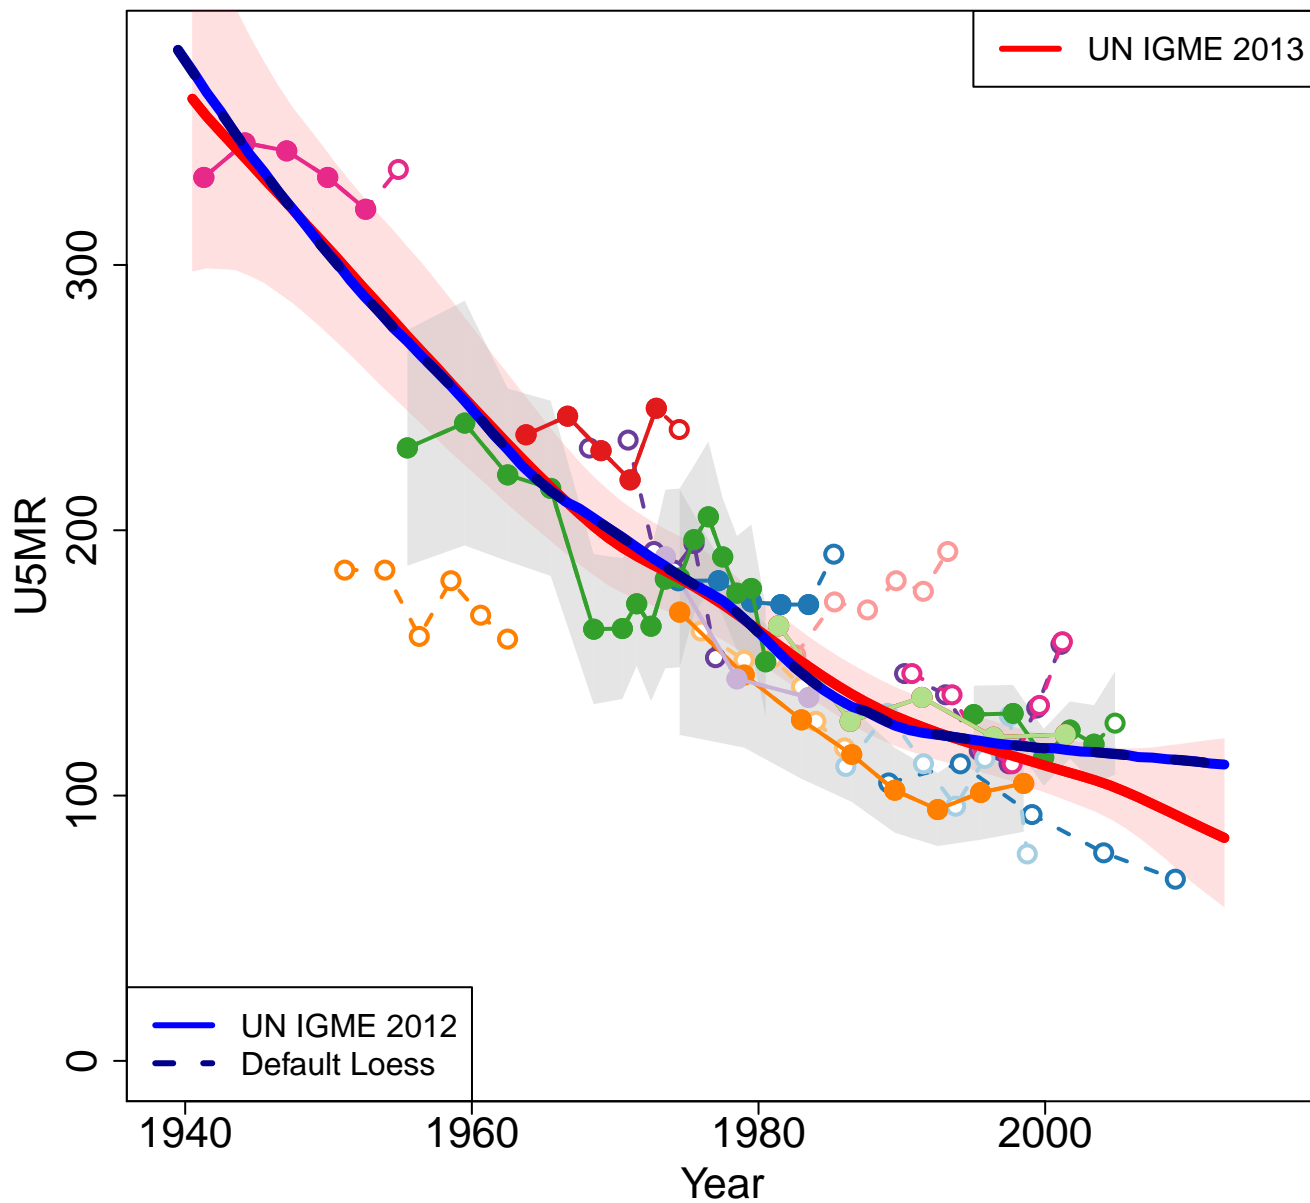

# Zoomed in

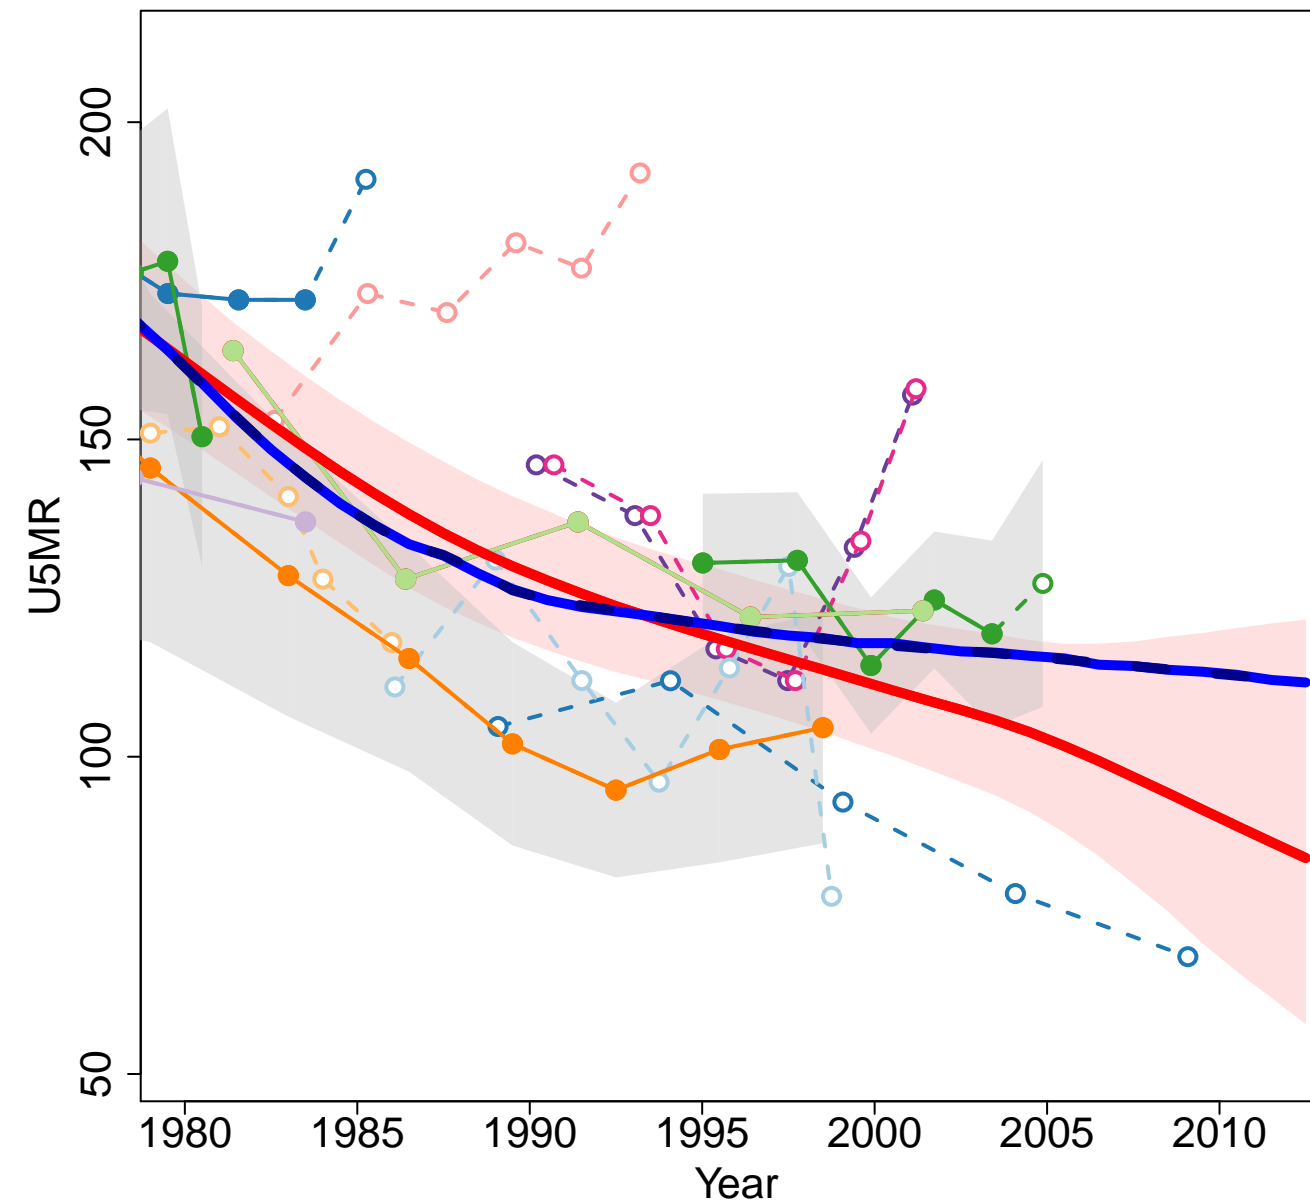

- Fouta-Toro-Survey 1957 (Others Indirect)
- Survey 1964-1965 (Others Indirect)
- Census 1977 (Census Indirect)
- World Fertility Survey 1981-1982 (Other DHS Indirect)
- World Fertility Survey 1981-1982 (Other DHS Direct)
- Census 1988 (Census Indirect)
- MCHS 1990 (Others Direct)
- MCHS 1990 (Others Indirect)
- Multiple Indicator Cluster Survey 1995 (MICS Indirect)
- EMIP 2000 (Others Direct)
- Demographic and Health Survey 2000-2001 (DHS Indirect)
- EMIP 2000 (Others Indirect)
- Demographic and Health Survey 2000-2001 (DHS Direct)
- EMIP survey 2003-2004 (Others Direct)
- EMIP survey 2003-2004 (Others Indirect)
- Multiple Indicator Cluster Survey 2007 (MICS Indirect)
- Multiple Indicator Cluster Survey 2011 (MICS Direct)

# Mexico

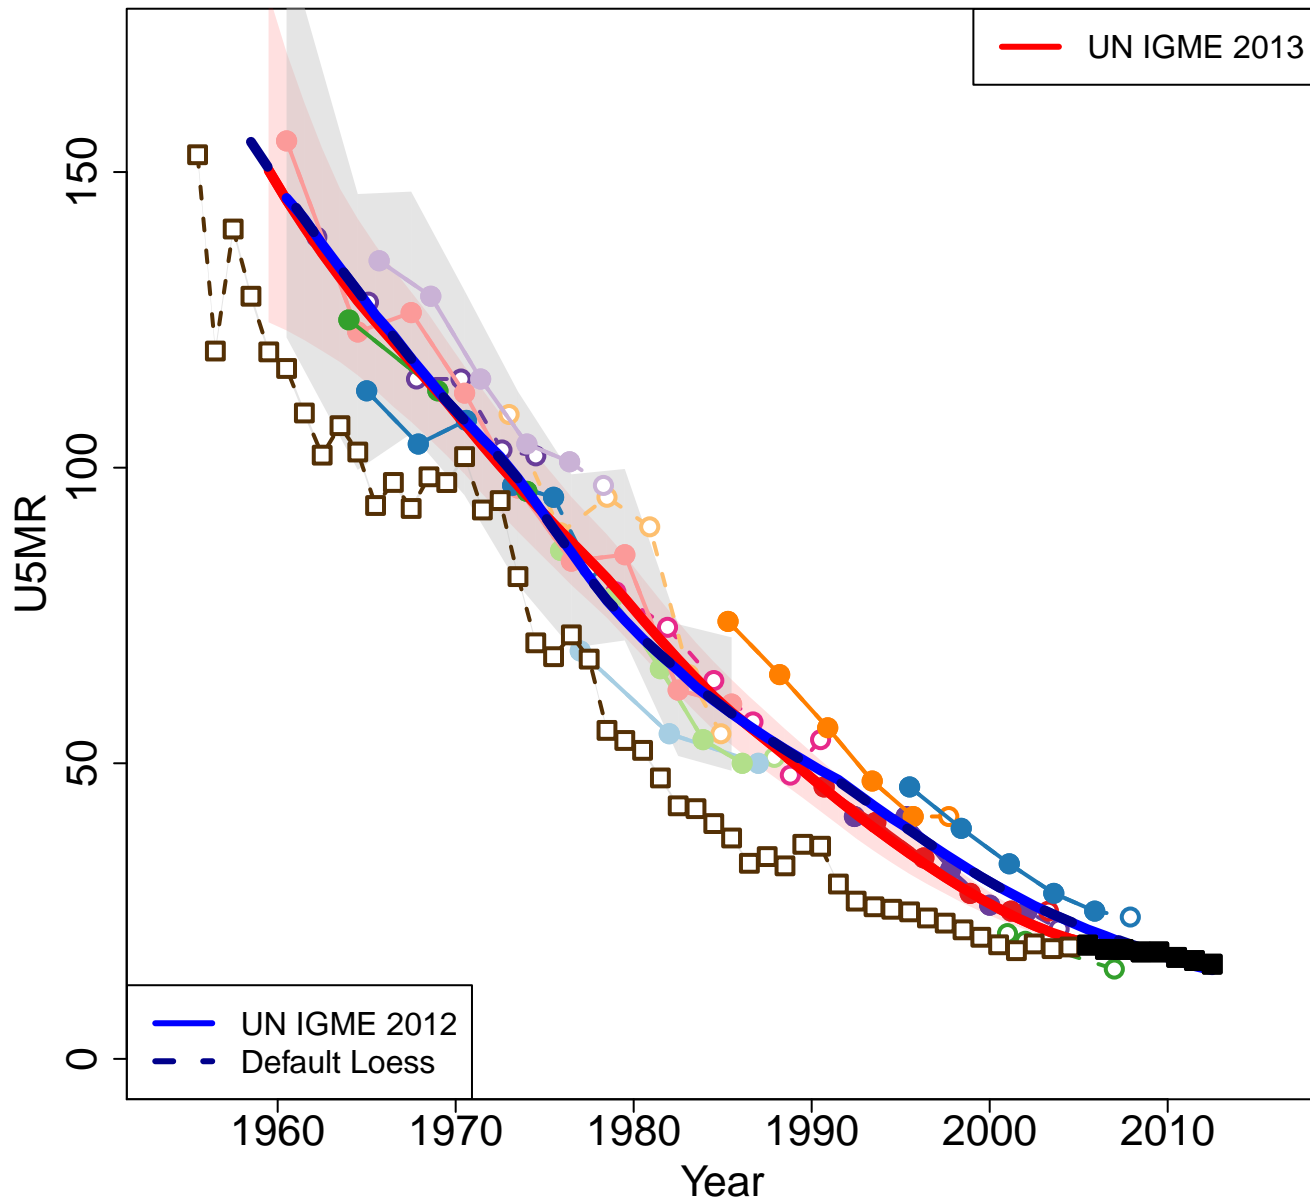

# Zoomed in

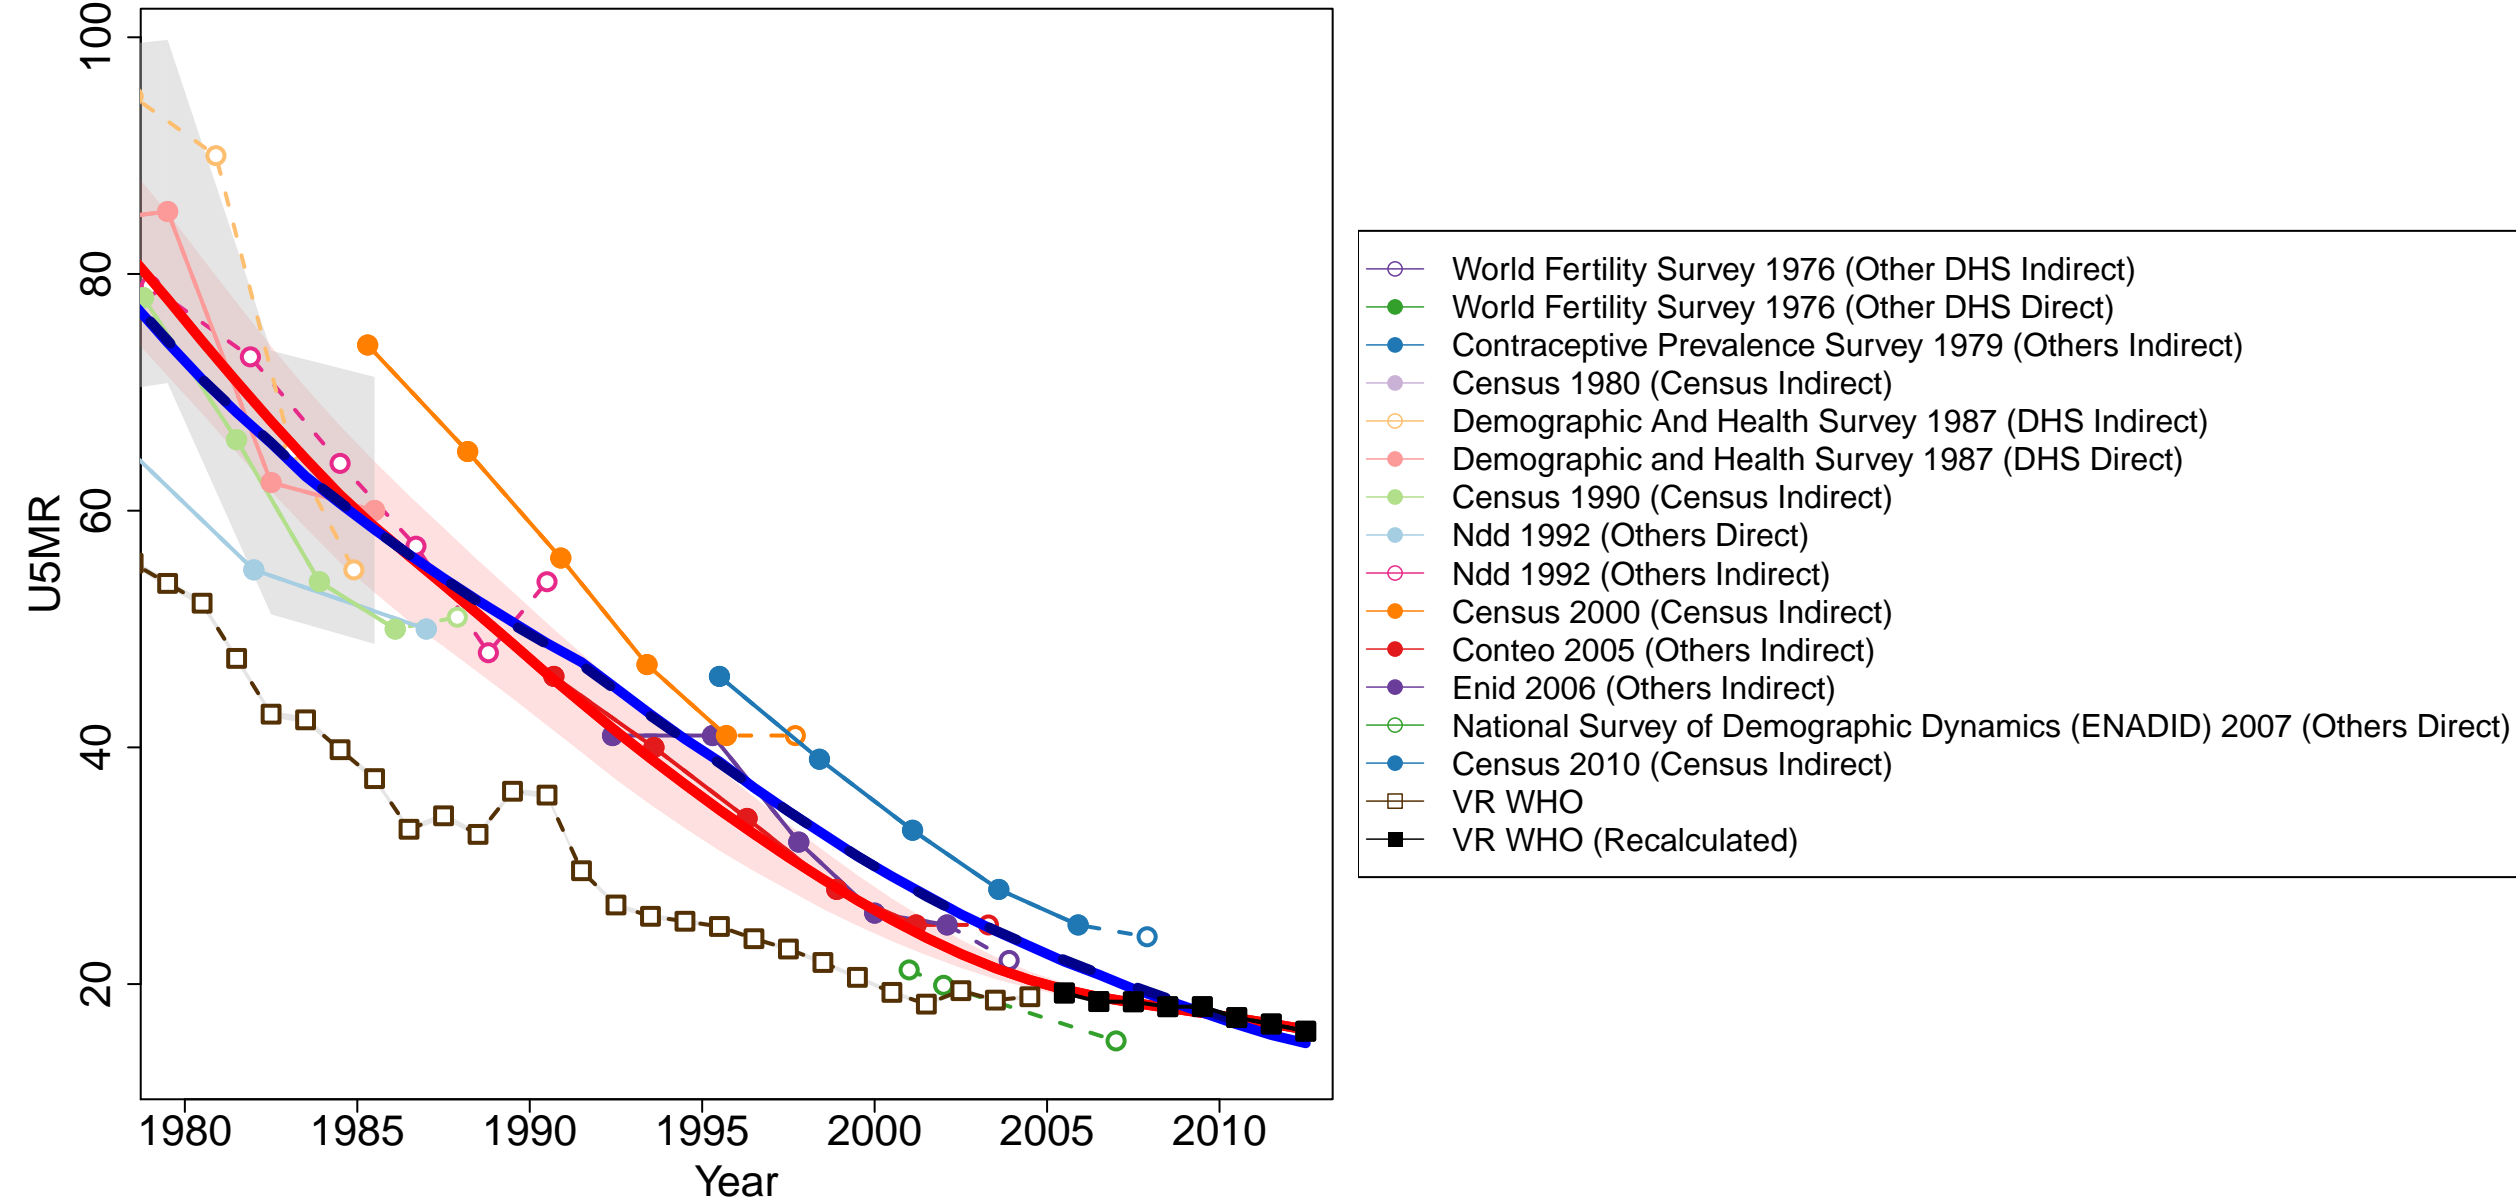

# Federated States of Micronesia

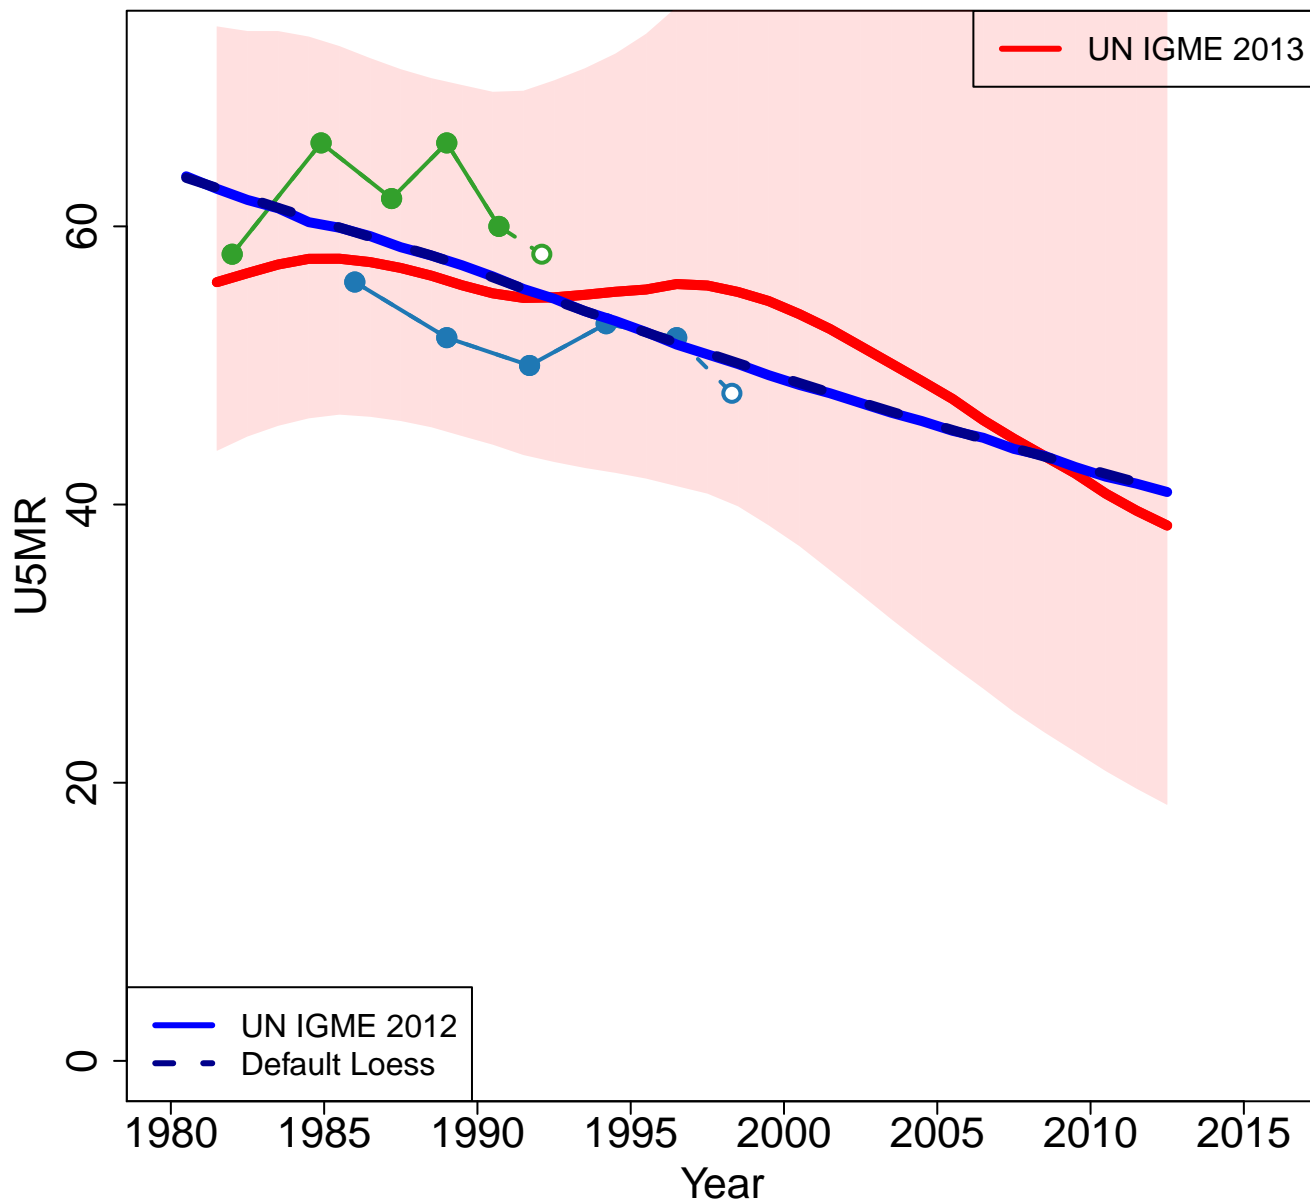

# Zoomed in

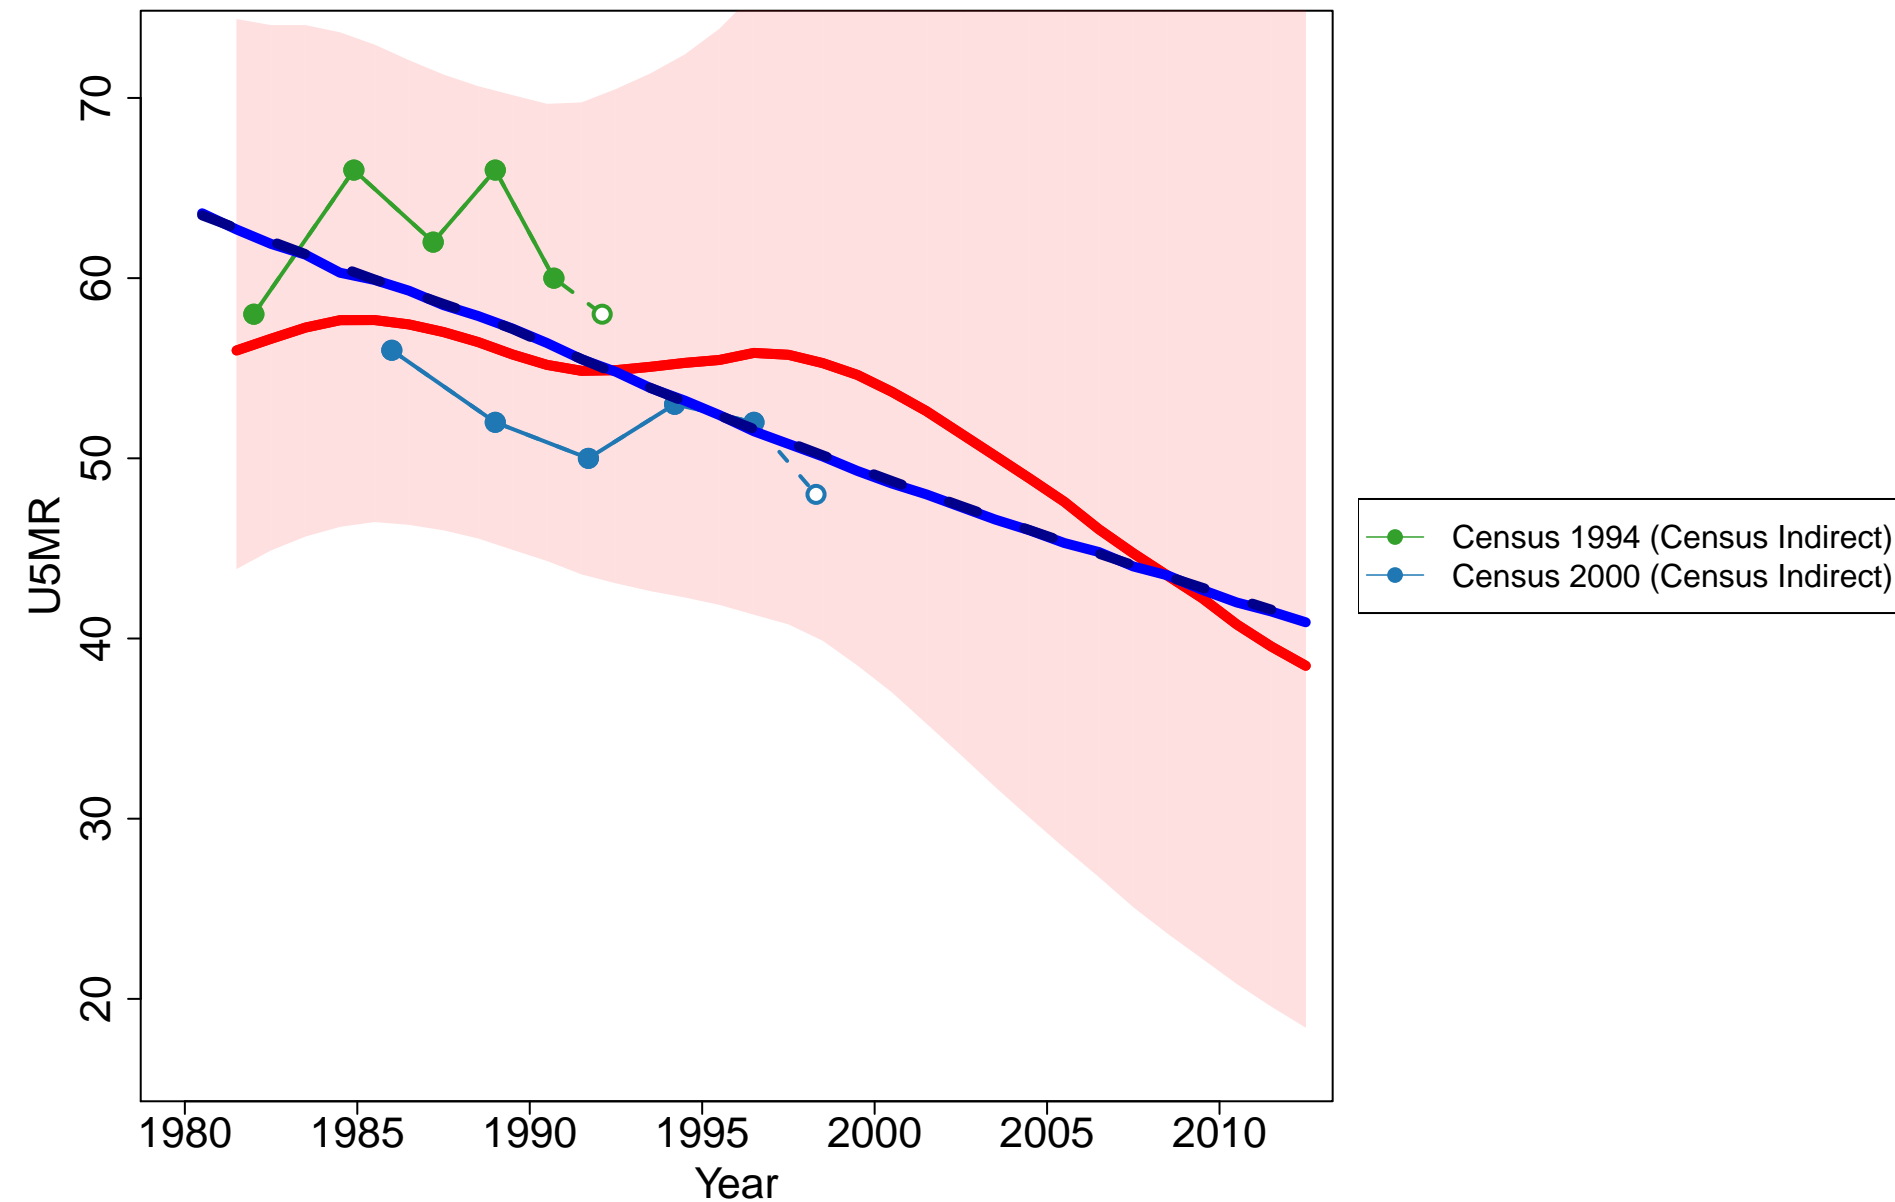

# Monaco

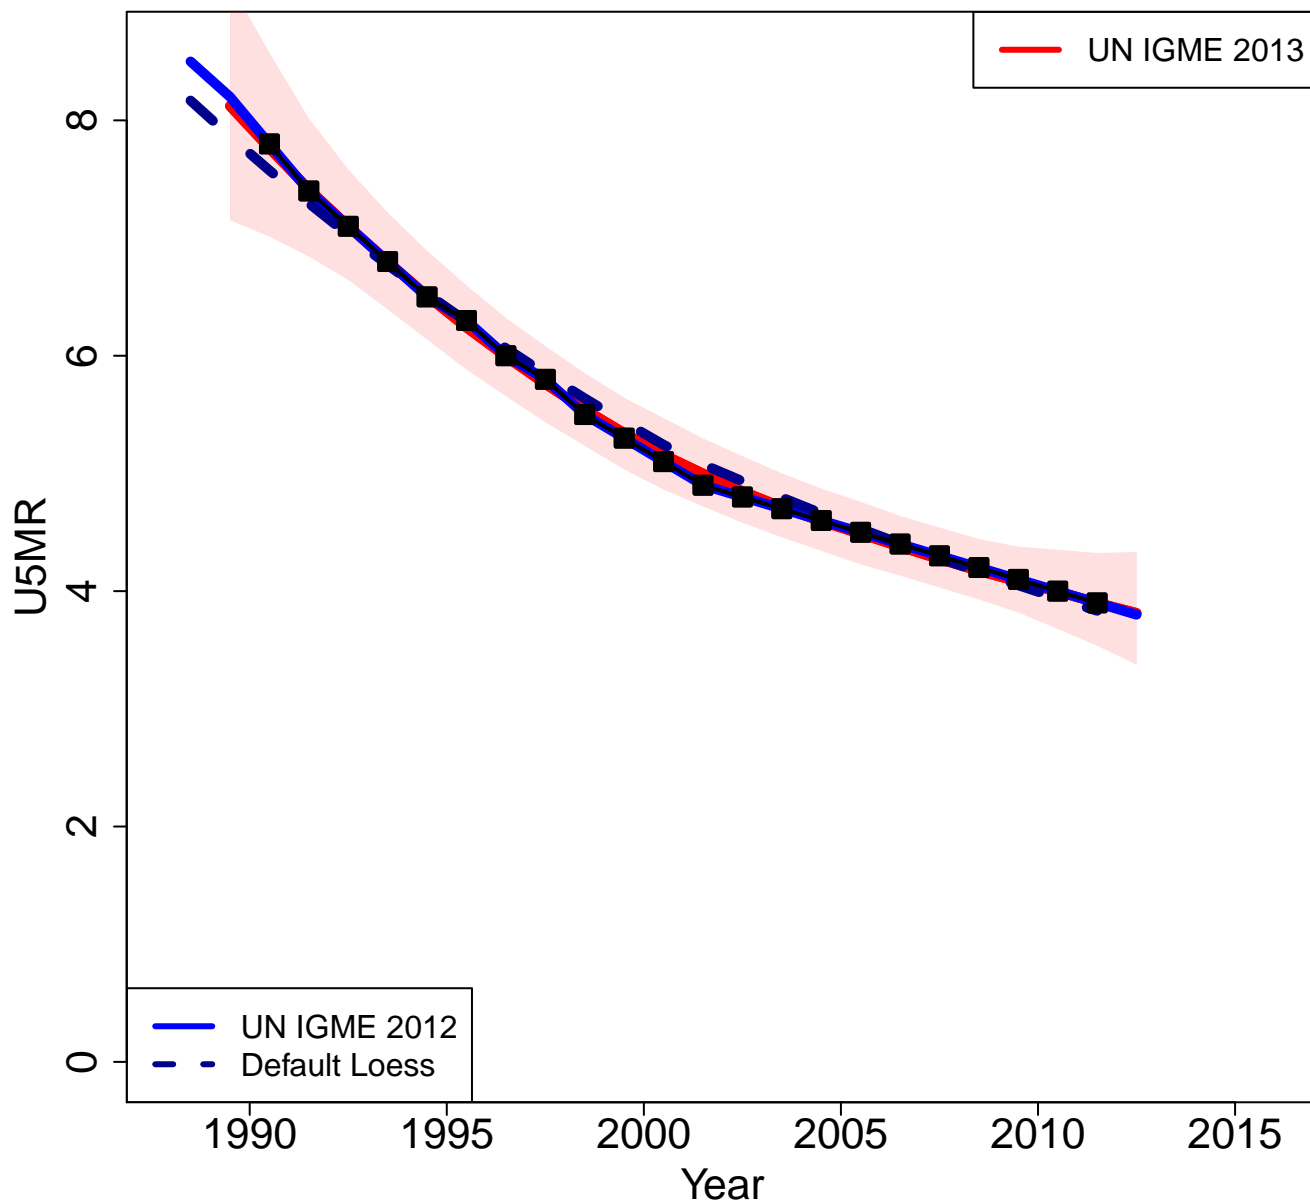

# Zoomed in

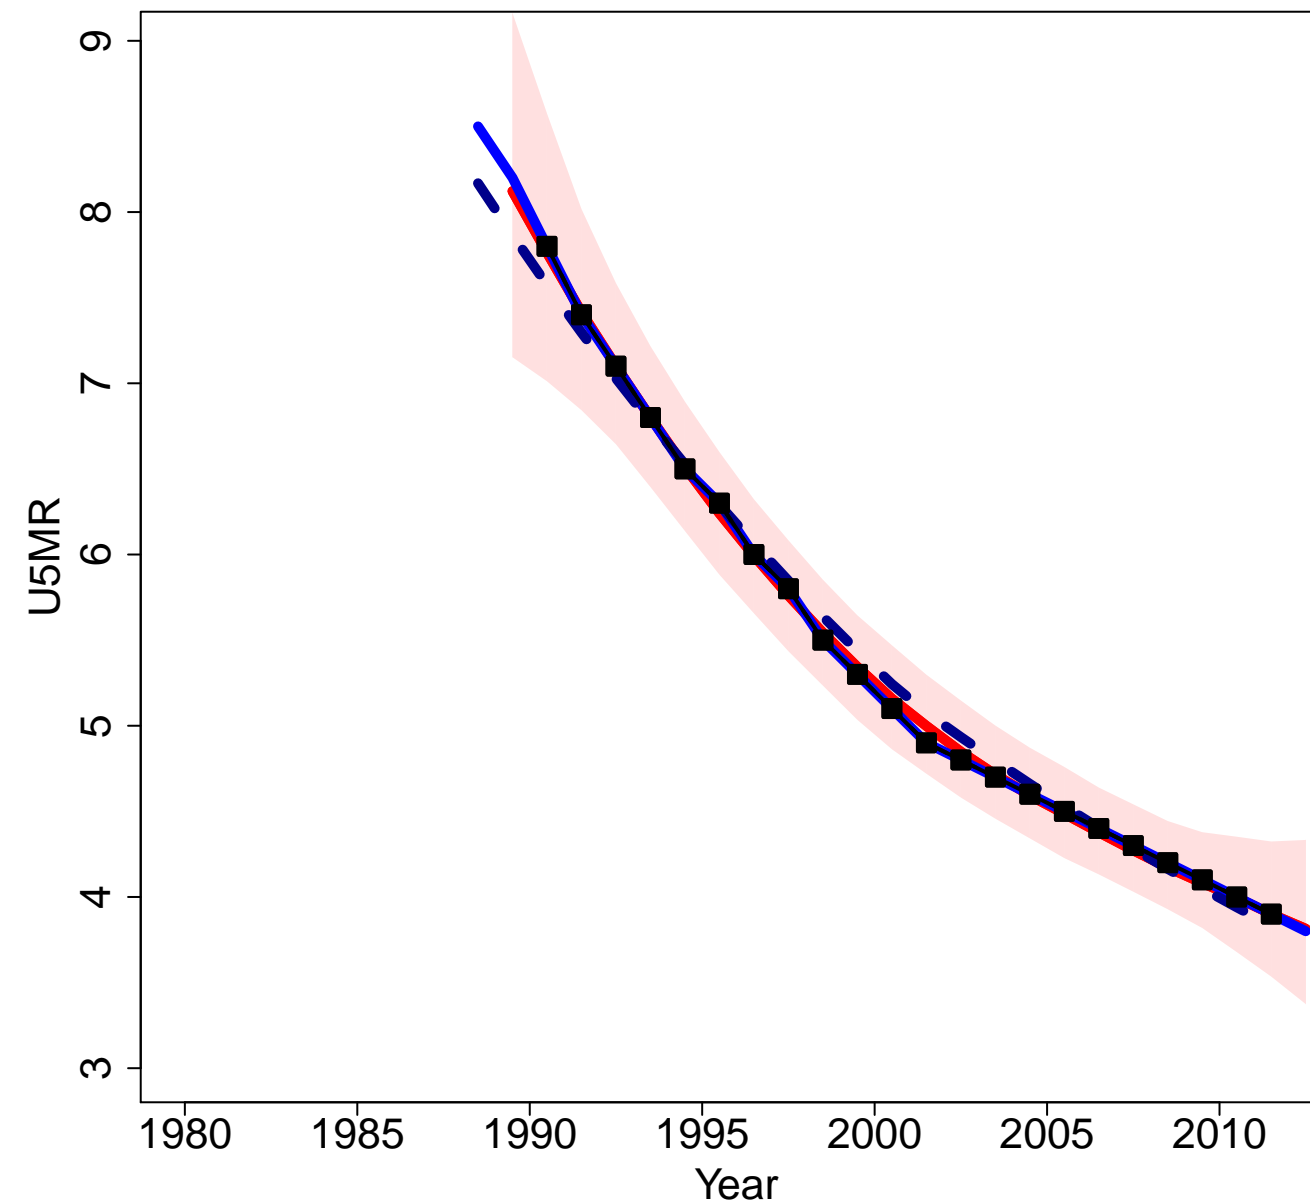

# Mongolia

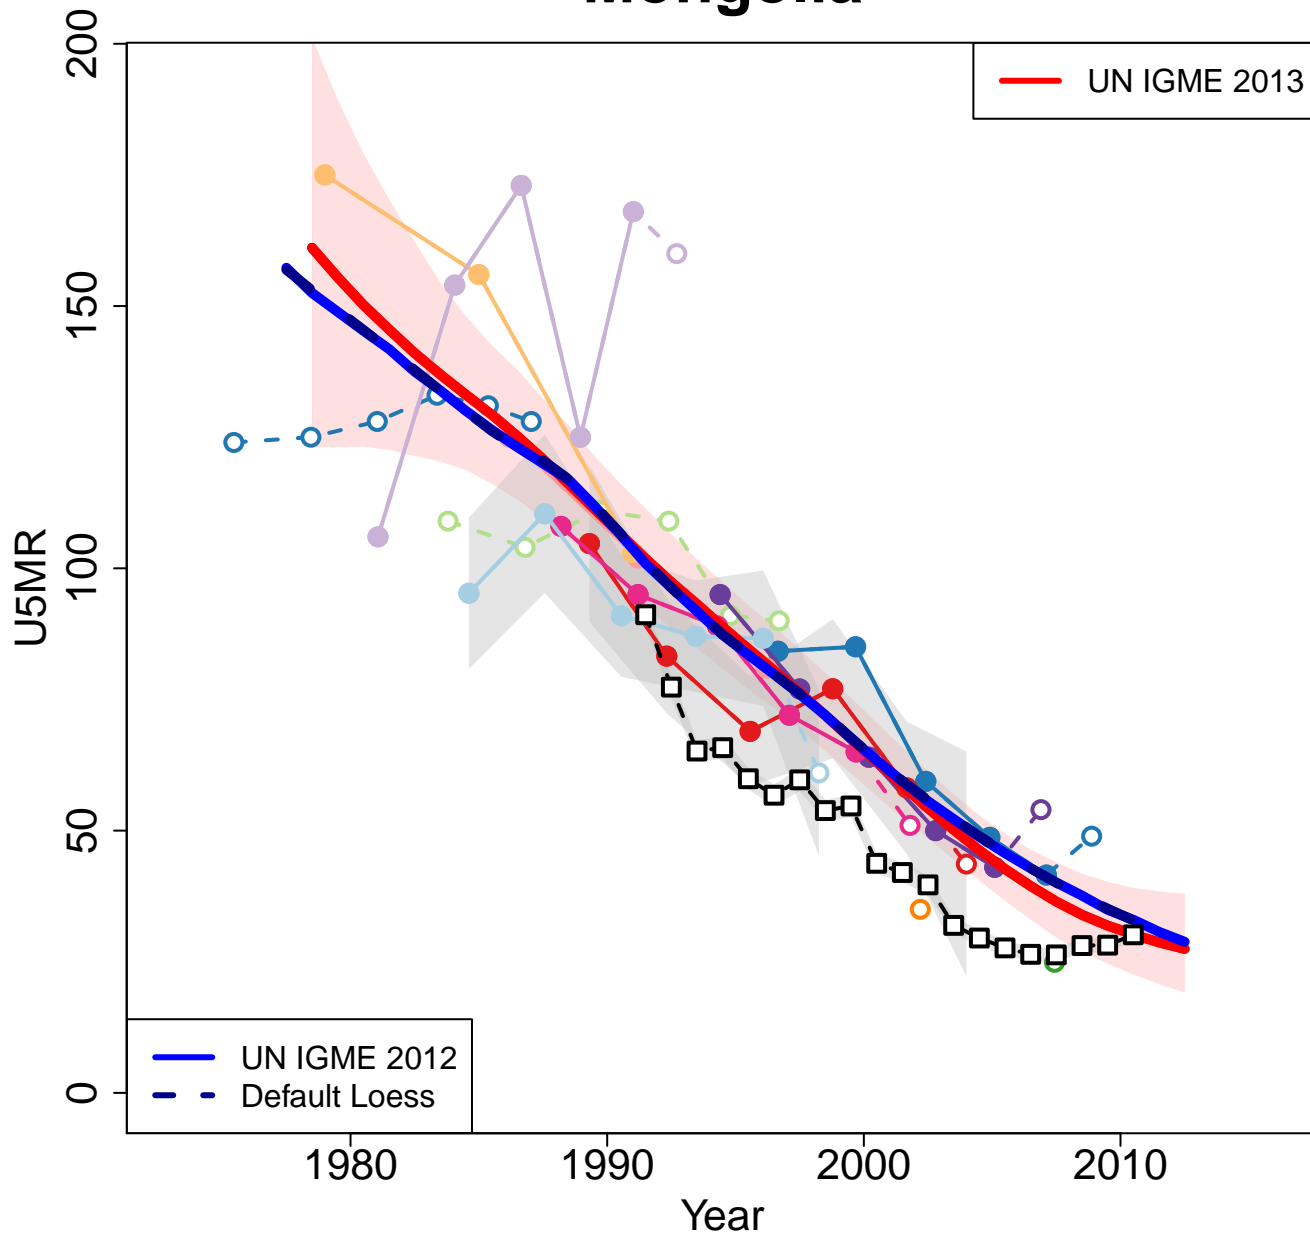

# Zoomed in

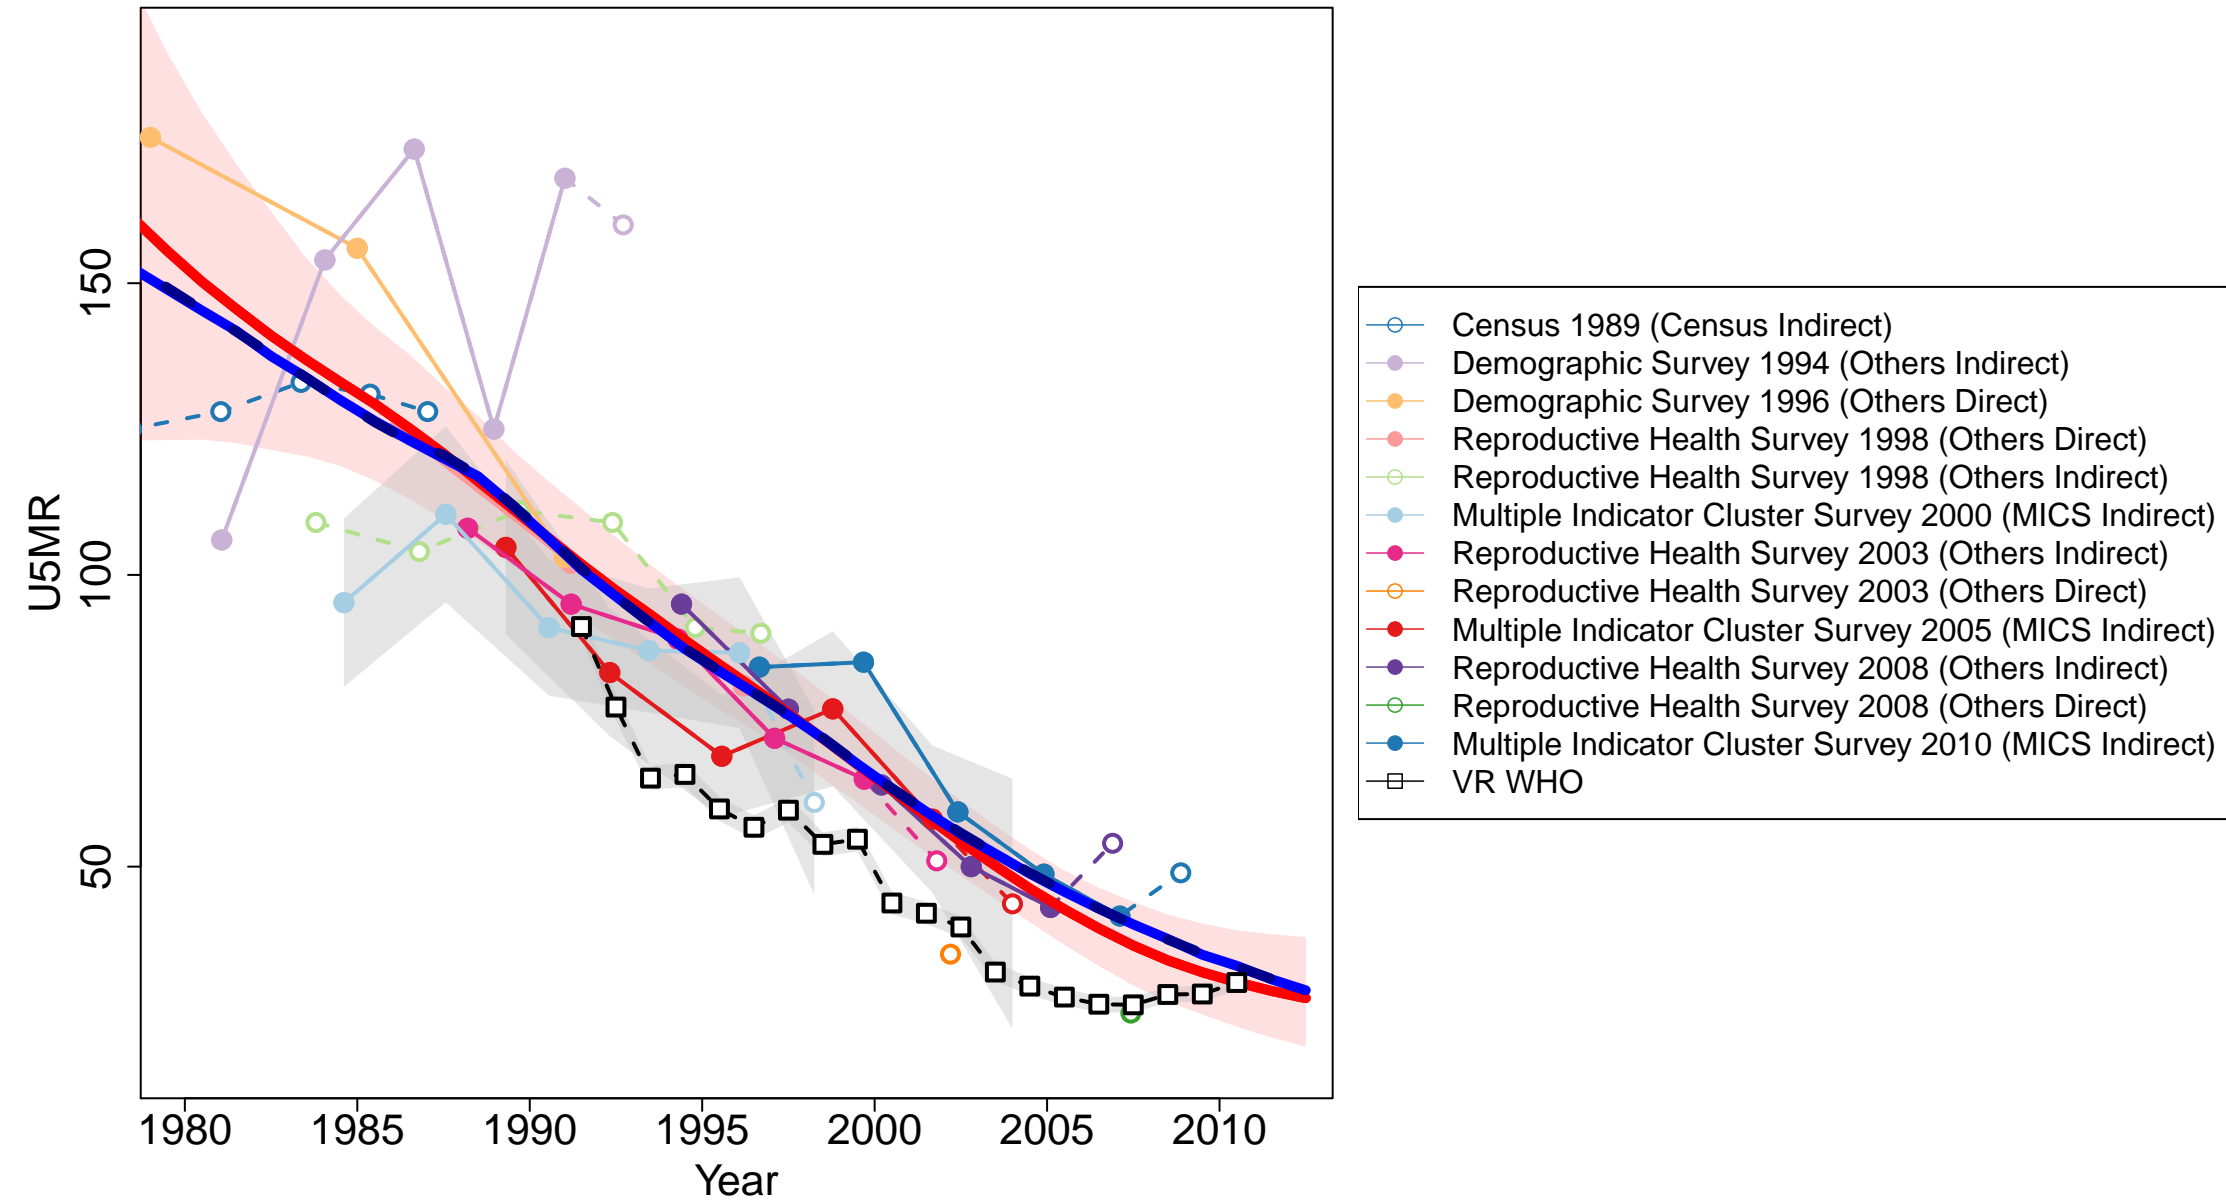



# Morocco

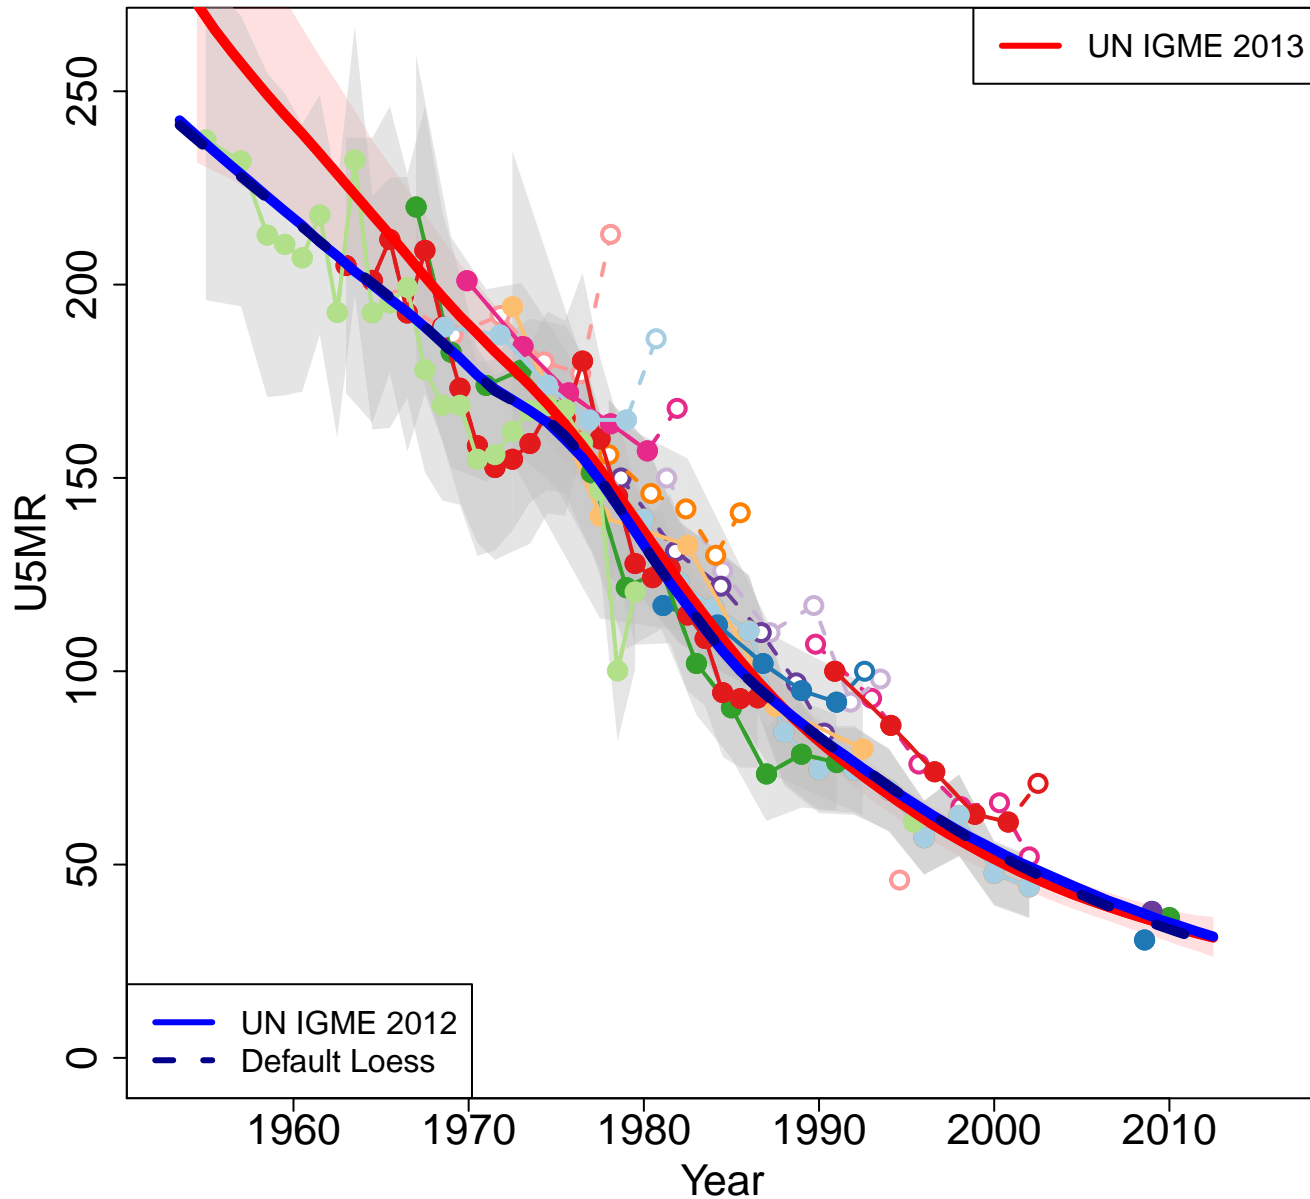

# Zoomed in

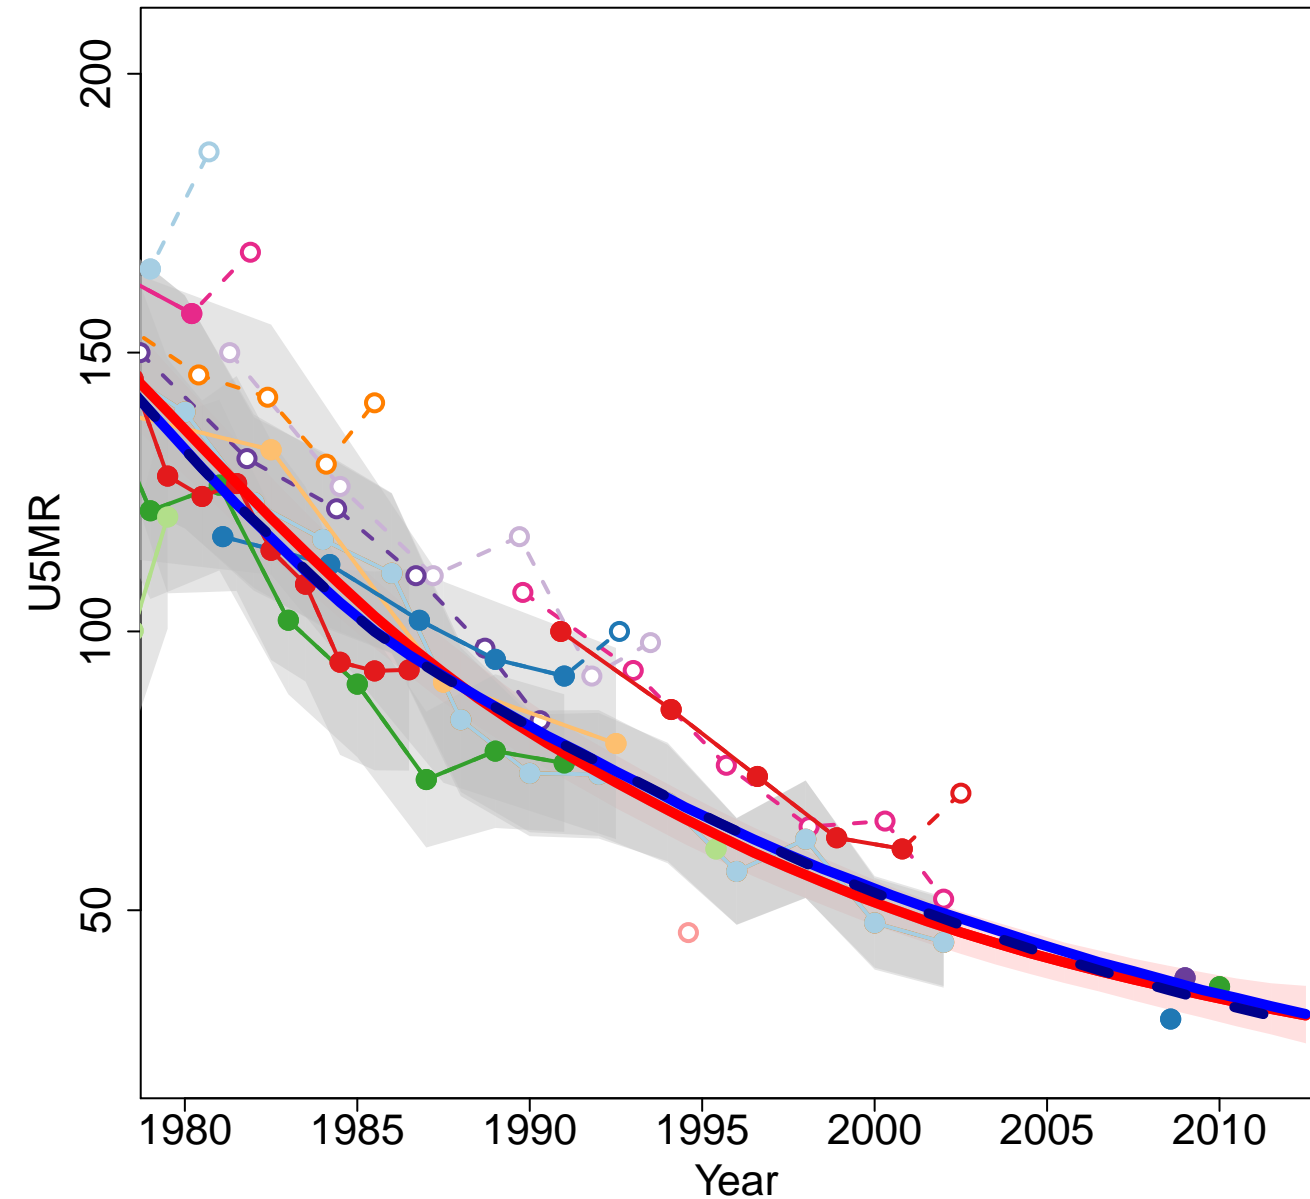

- World Fertility Survey 1980 (Other DHS Indirect)
- World Fertility Survey 1980 (Other DHS Direct)
- Census 1982 (Census Indirect)
- Contraceptive Prevalence Survey 1983 (Others Indirect)
- Demographic and Health Survey 1987 (DHS Indirect)
- Demographic and Health Survey 1987 (DHS Direct)
- Demographic and Health Survey 1992 (DHS Indirect)
- Demographic and Health Survey 1992 (DHS Direct)
- Census 1994 (Census Indirect)
- Demographic and Health Survey 1995 (DHS Indirect)
- Demographic and Health Survey 1995 (DHS Direct)
- PAPG ENSME grand-echantillon 1996 1996 (Others Direct)
- PAPG ENSME petit-echantillon 1997 1997 (Others Direct)
- PAPFAM Family Health Survey 2003–2004 (Others Direct)
- Demographic and Health Survey 2003–2004 (DHS Indirect)
- Demographic and Health Survey 2003–2004 (DHS Direct)
- Census 2004 (Census Indirect)
- National Demographic Survey (Preliminary) 2009 (Others Household Deaths)
- National Demographic Survey with repeated passages 2010 (Others Household Deaths)
- Enquete Nationale sur la Population et la Sante Familiale 2011 (Others Direct)

# Myanmar

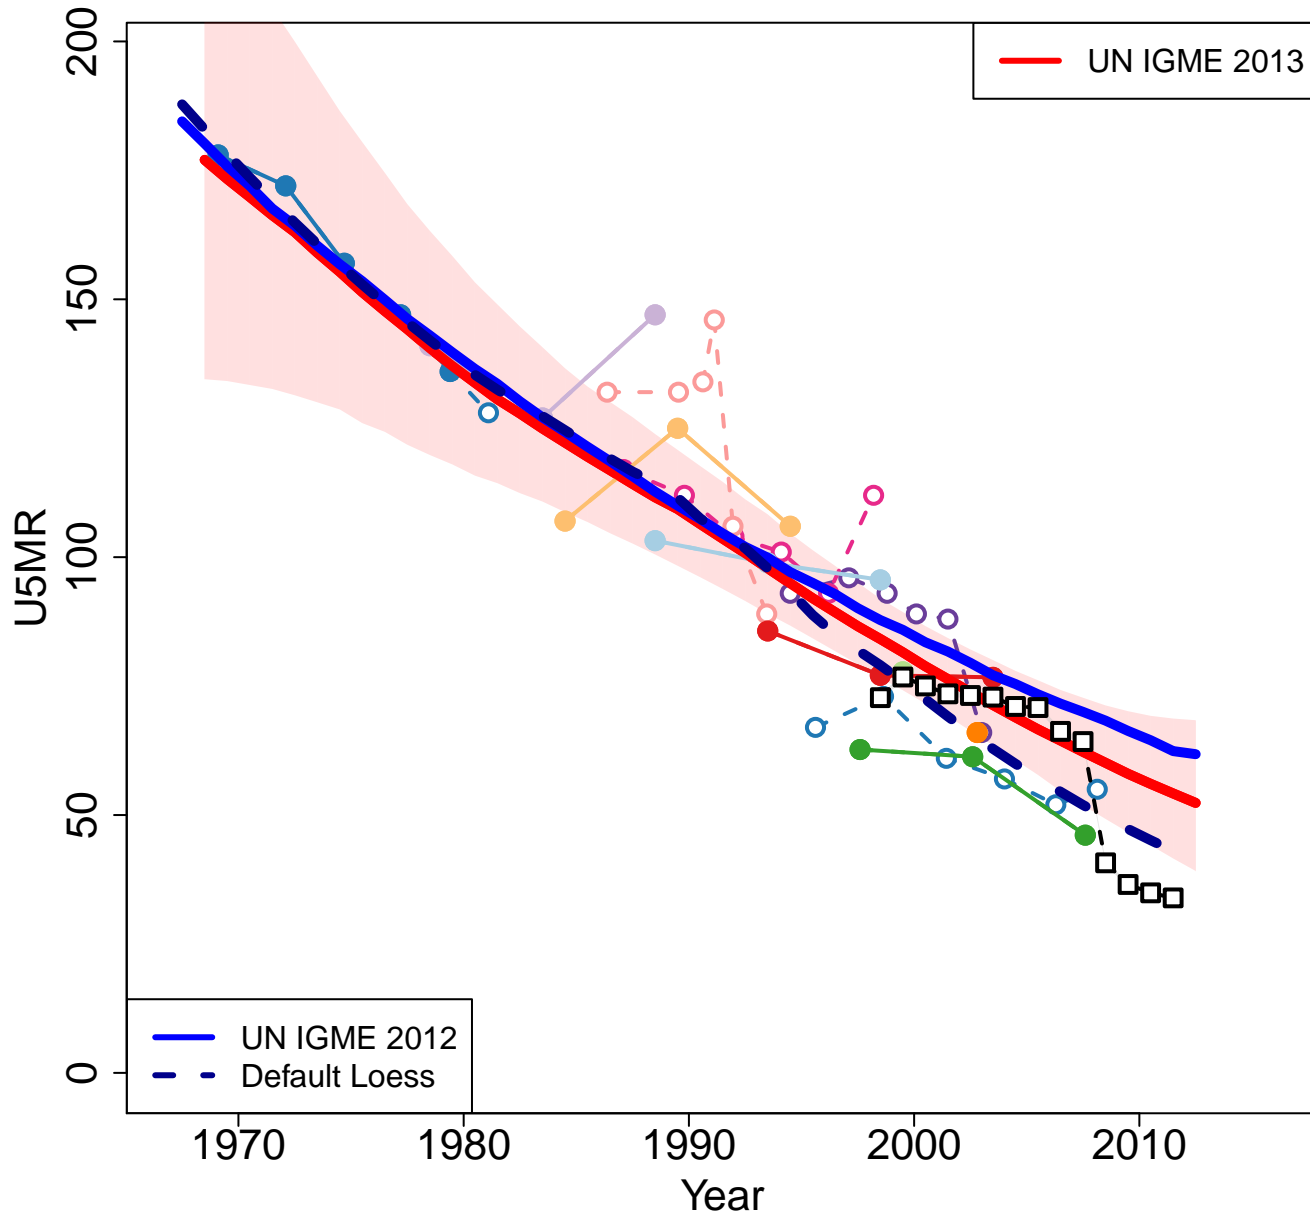

# Zoomed in

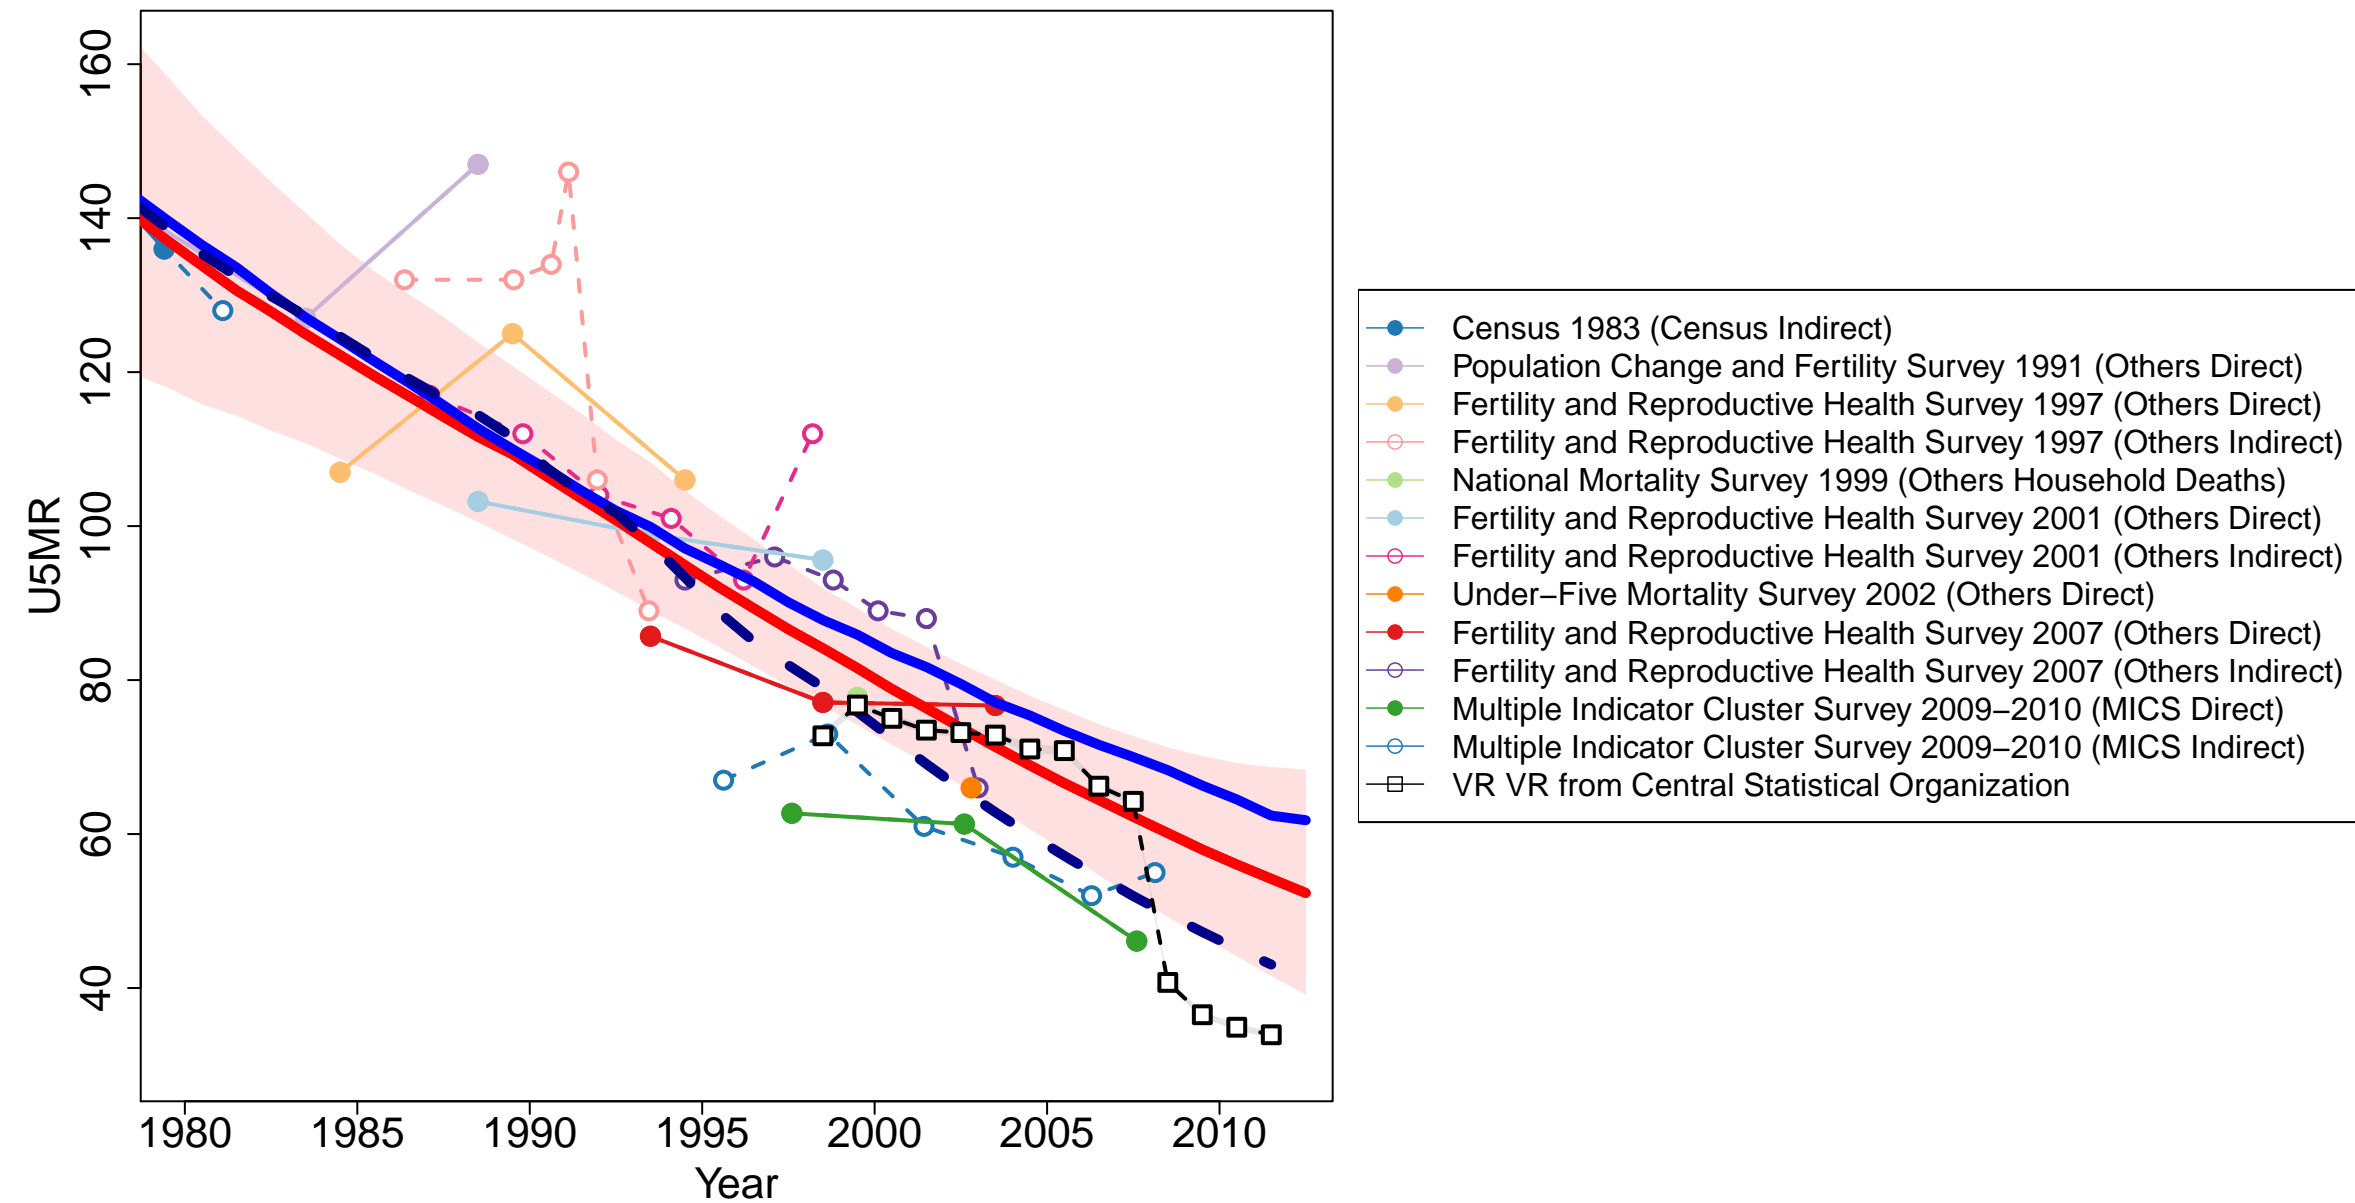

# Nepal

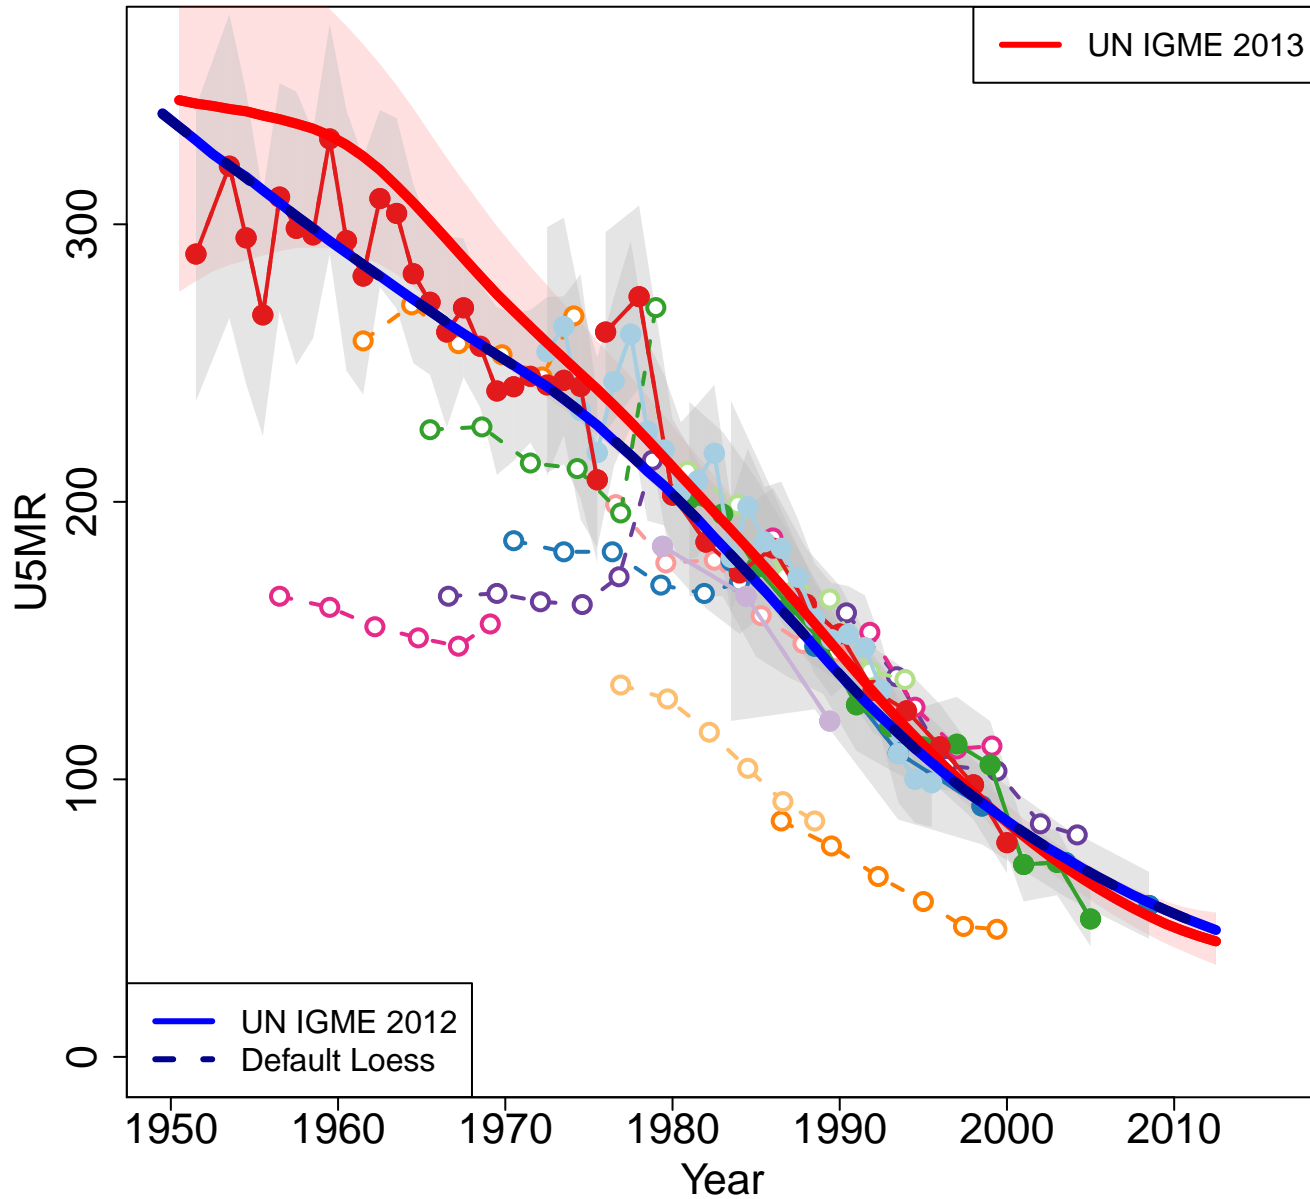

# Zoomed in

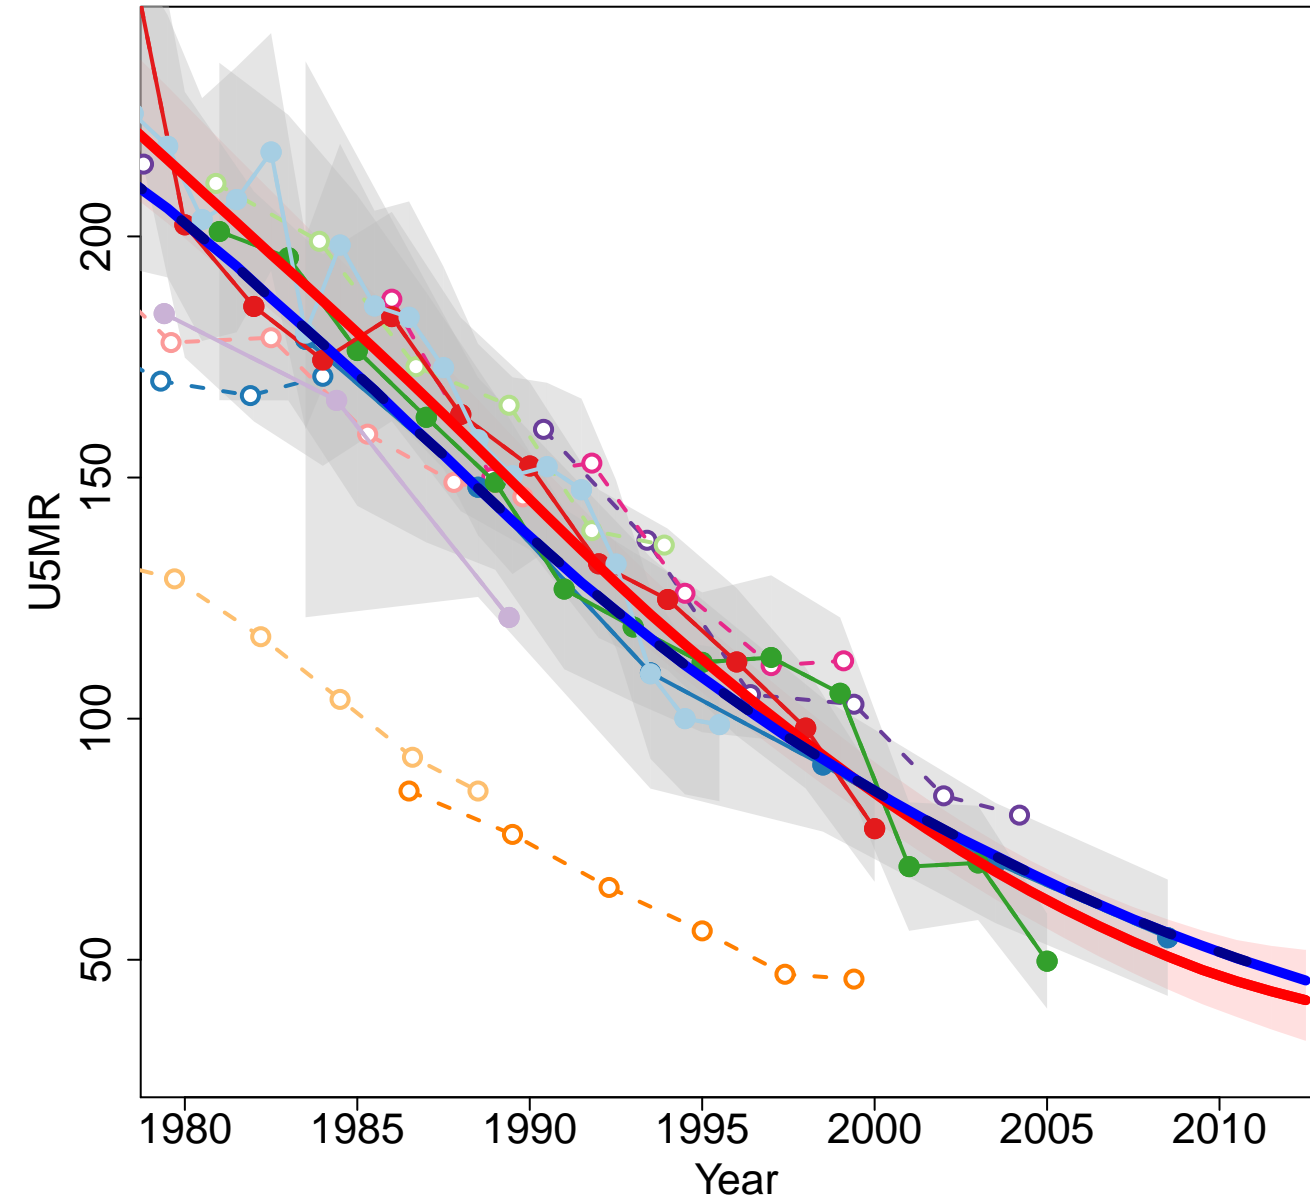

- Census 1971 (Census Indirect)
- World Fertility Survey 1976 (Other DHS Indirect)
- World Fertility Survey 1976 (Other DHS Direct)
- Census 1981 (Census Indirect)
- Contraceptive Prevalence Survey 1981 (Others Indirect)
- Fertility and Family Planning Survey 1986 (Others Indirect)
- Fertility and Family Planning Survey 1991 (Others Direct)
- Census 1991 (Census Indirect)
- Fertility and Family Planning Survey 1991 (Others Indirect)
- Demographic and Health Survey 1996 (DHS Indirect)
- Demographic and Health Survey 1996 (DHS Direct)
- Demographic and Health Survey 2001 (DHS Indirect)
- Census 2001 (Census Indirect)
- Demographic and Health Survey 2001 (DHS Direct)
- Demographic and Health Survey 2006 (DHS Indirect)
- Demographic and Health Survey 2006 (DHS Direct)
- Demographic and Health Survey 2011 (DHS Direct)

# Nicaragua

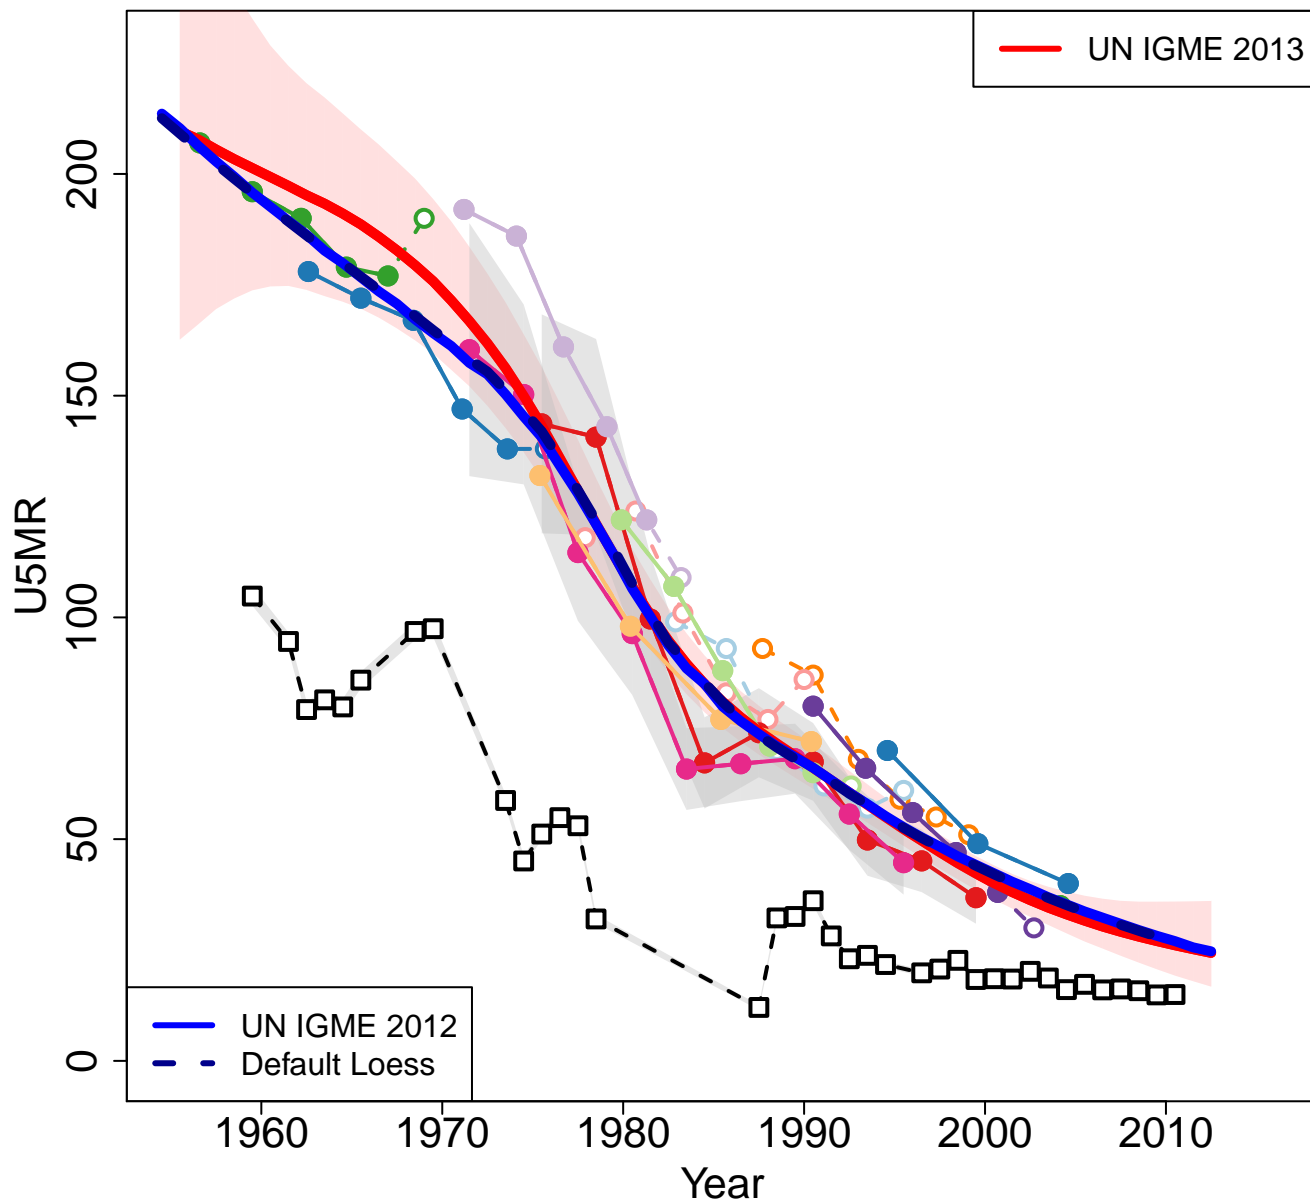

# Zoomed in

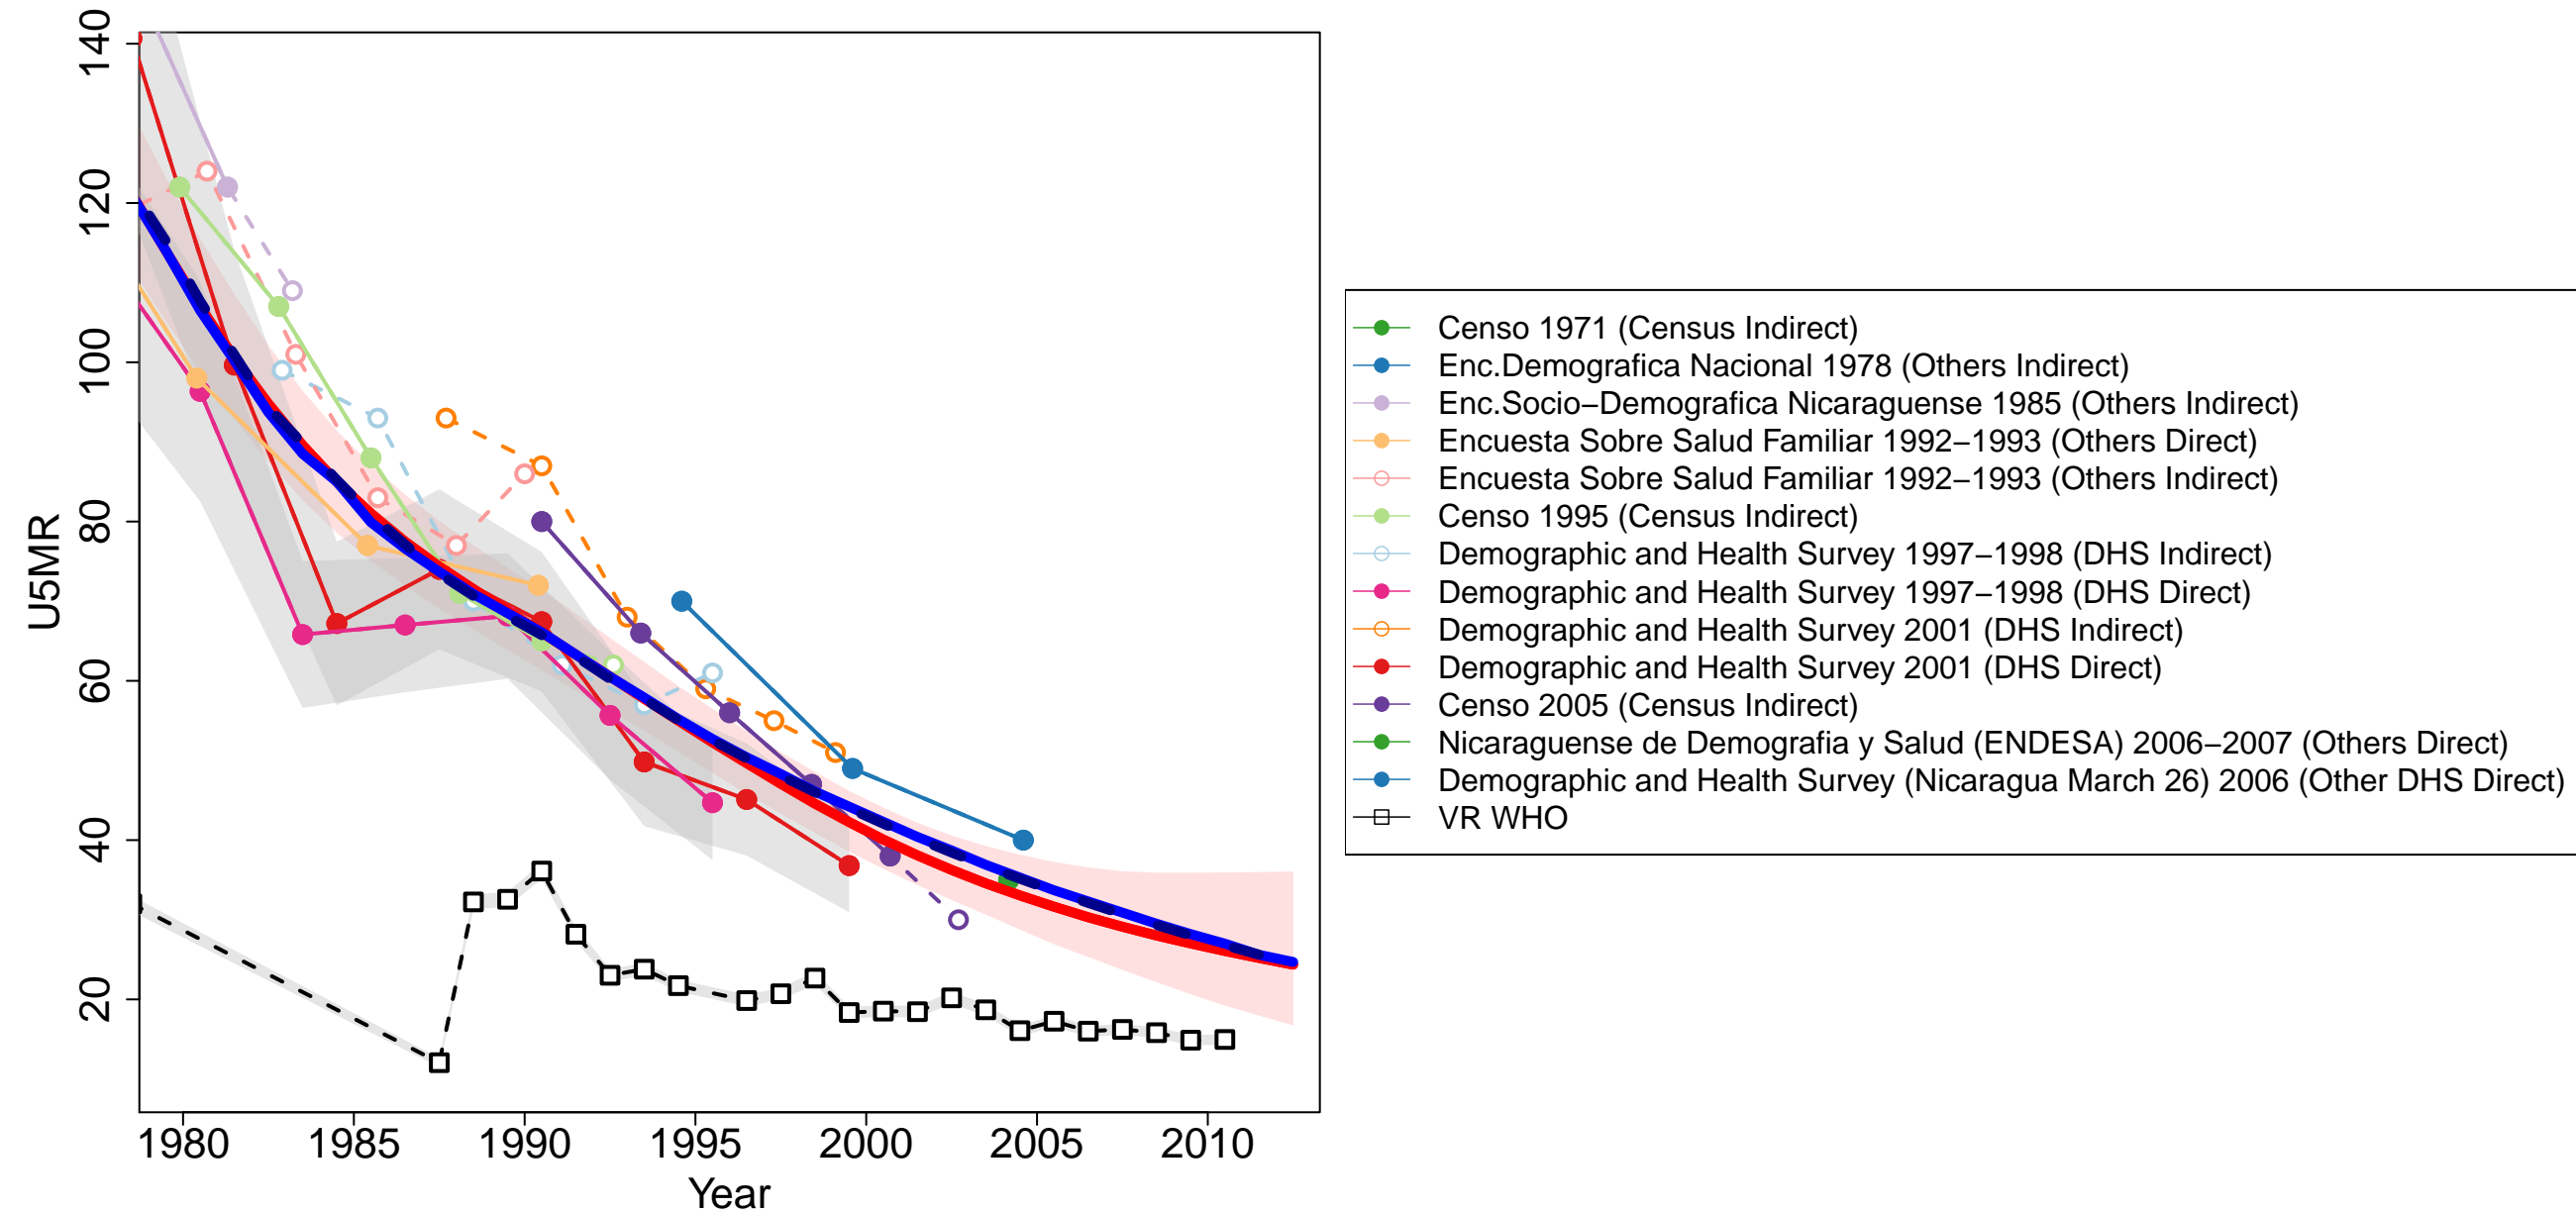

# Niger

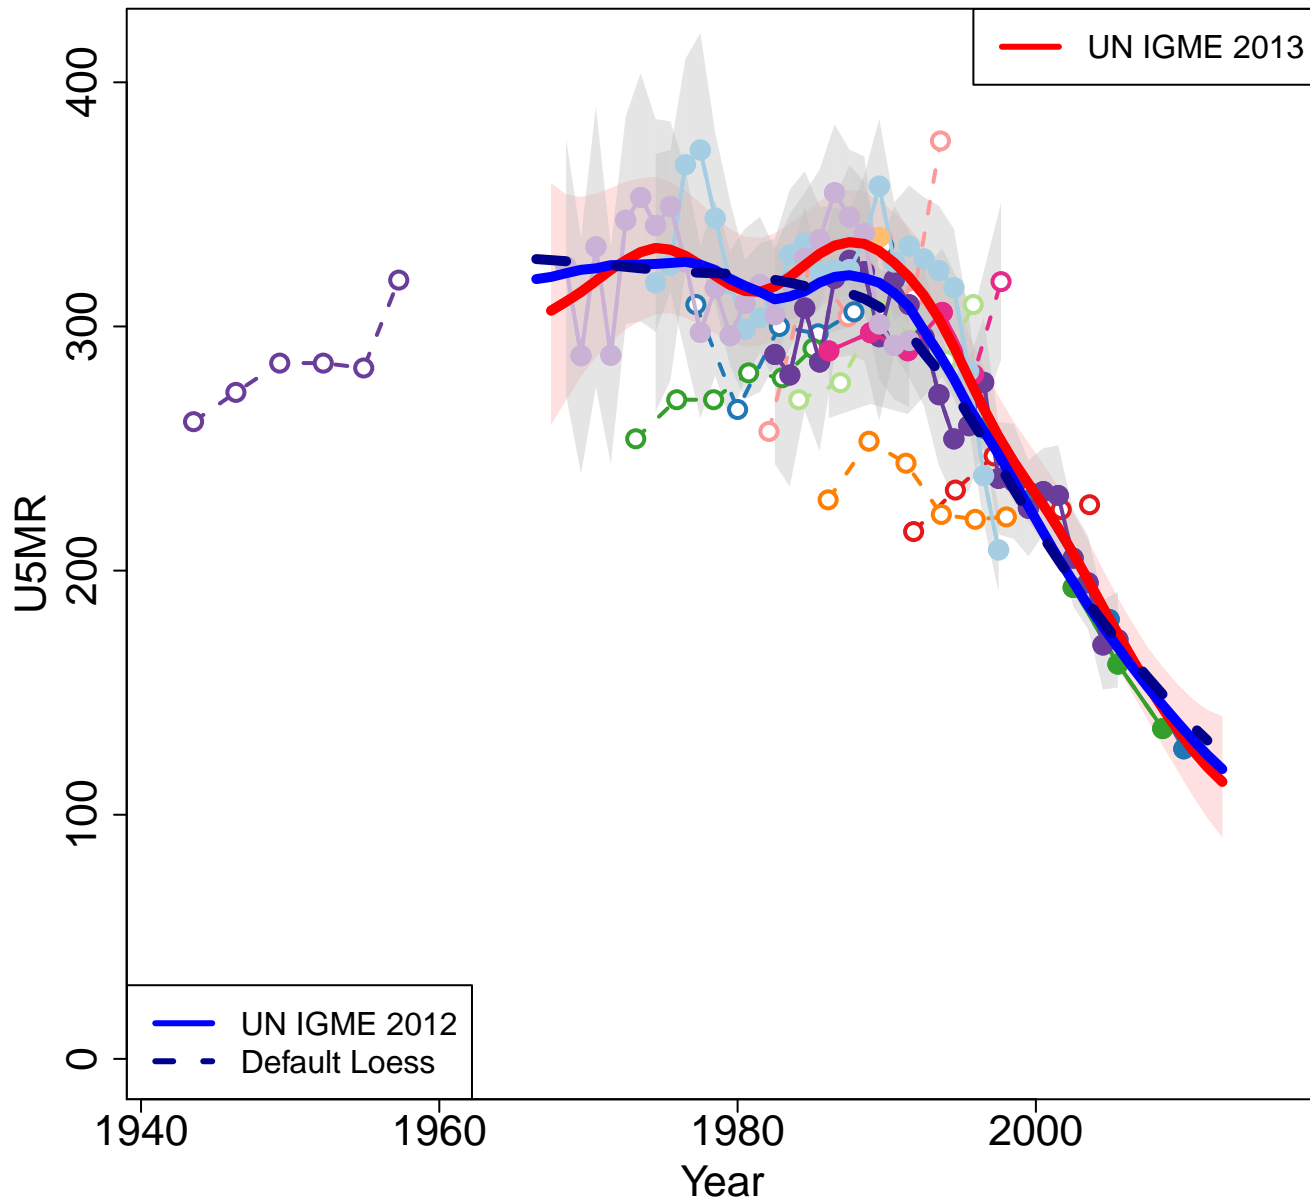

# Zoomed in

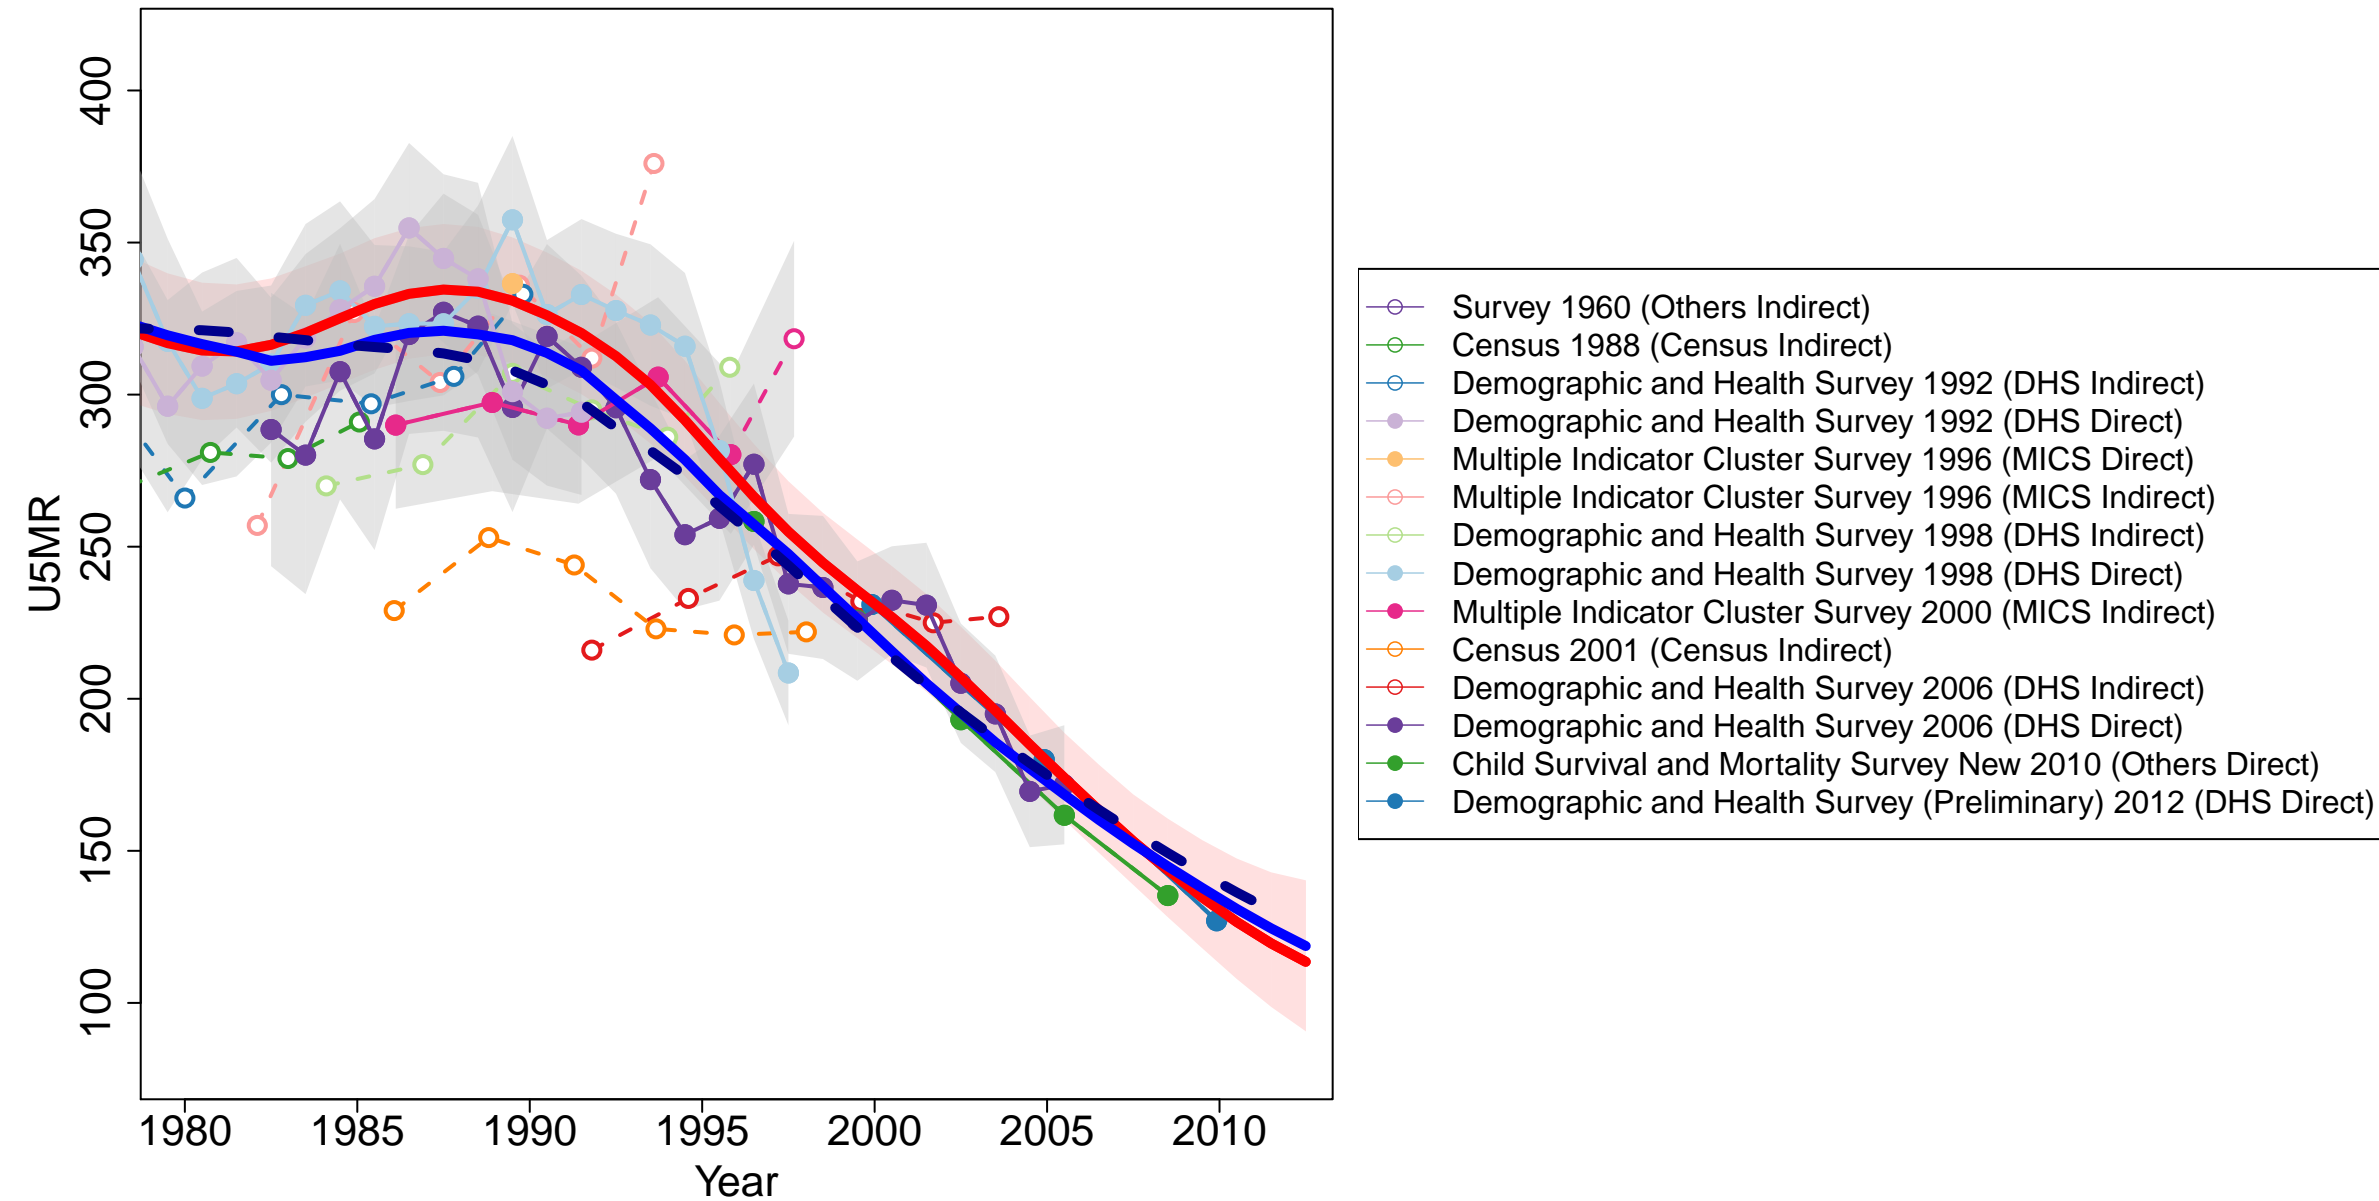



# Nigeria

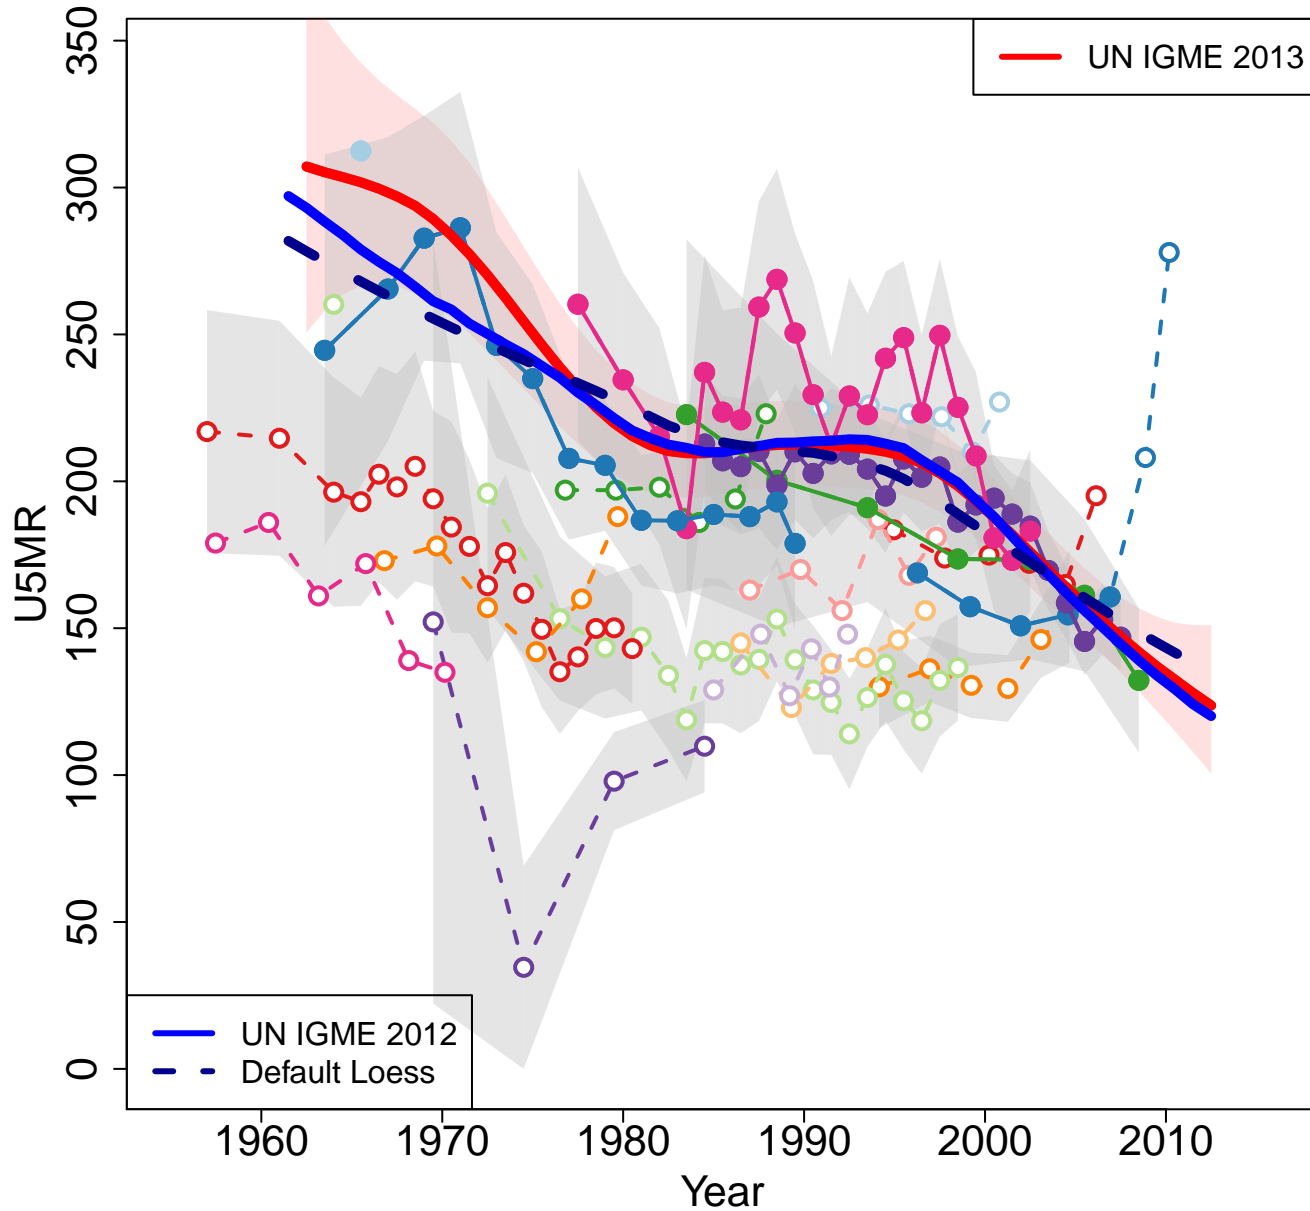

# Zoomed in

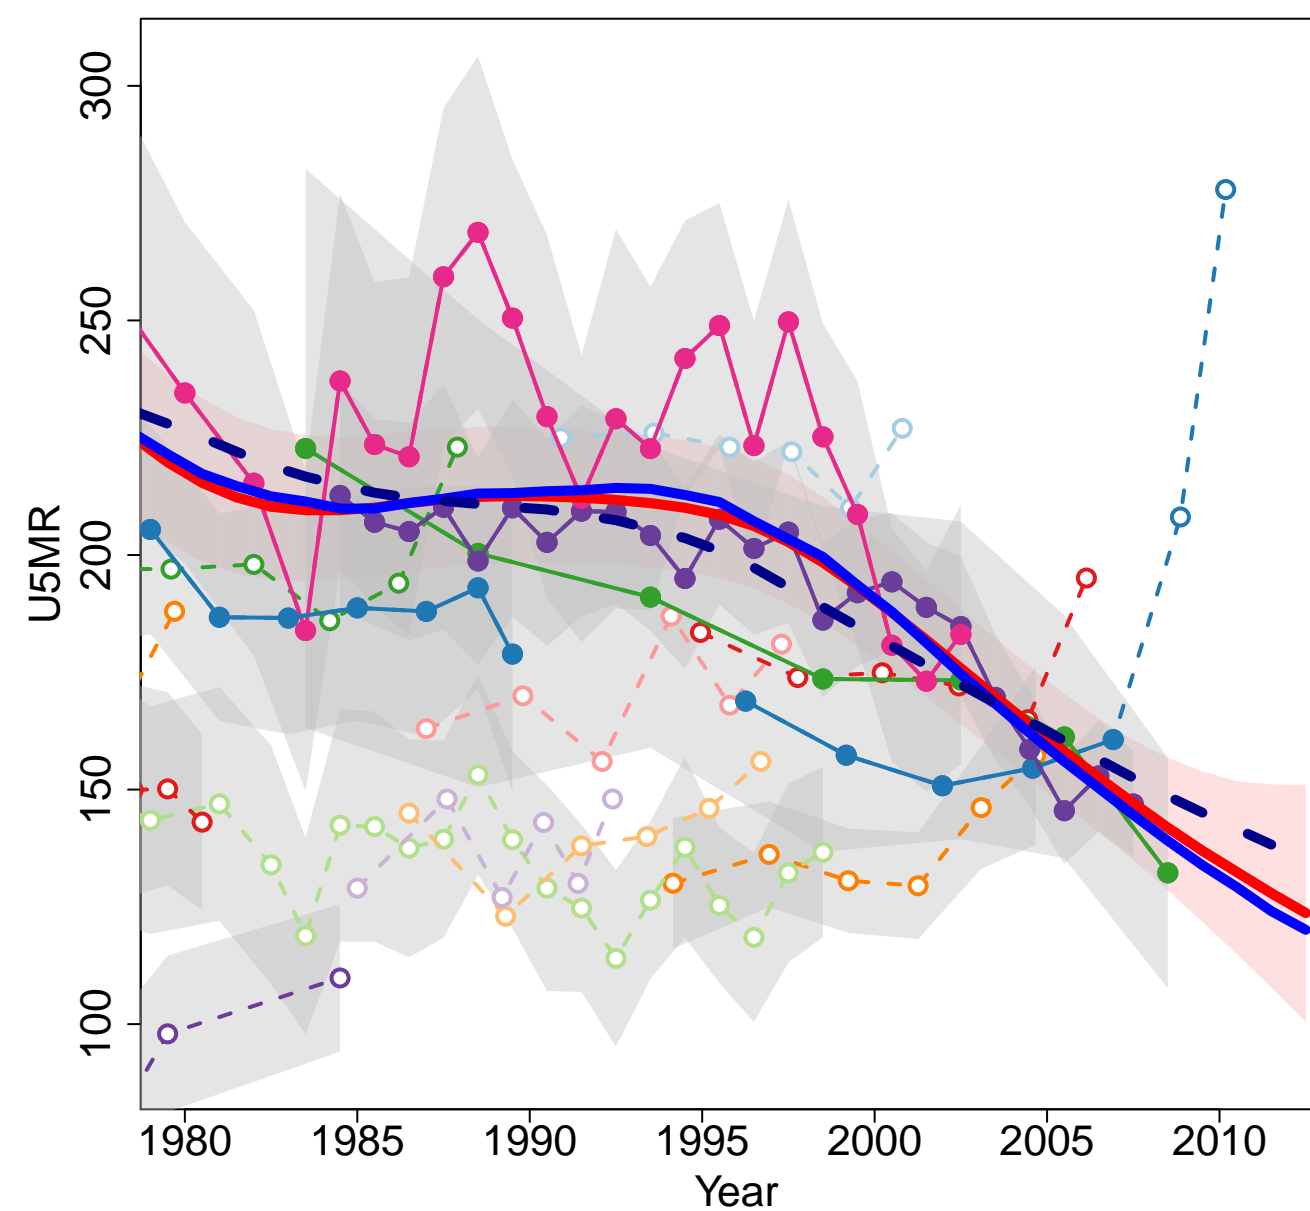

- Malumfashi DSS 1964 (Others Household Deaths)
- Rural Survey 1965 (Others Household Deaths)
- Survey 1971–1973 (Others Indirect)
- World Fertility Survey 1981–1982 (Other DHS Indirect)
- World Fertility Survey 1981–1982 (Other DHS Direct)
- Demographic and Health Survey 1986 (Other DHS Direct)
- Demographic and Health Survey 1990 (DHS Indirect)
- Demographic and Health Survey 1990 (DHS Direct)
- Multiple Indicator Cluster Survey 1995 (MICS Indirect)
- Demographic and Health Survey 1999 (DHS Indirect)
- Multiple Indicator Cluster Survey 1999 (MICS Indirect)
- Demographic and Health Survey 1999 (DHS Direct)
- Demographic and Health Survey 2003 (DHS Indirect)
- Demographic and Health Survey 2003 (DHS Direct)
- Multiple Indicator Cluster Survey 2007 (MICS Indirect)
- Demographic and Health Survey 2008 (DHS Indirect)
- Demographic and Health Survey 2008 (DHS Direct)
- Malaria Indicator Survey 2010 (Other DHS Direct)
- Multiple Indicator Cluster Survey 2011 (MICS Indirect)

# Niue

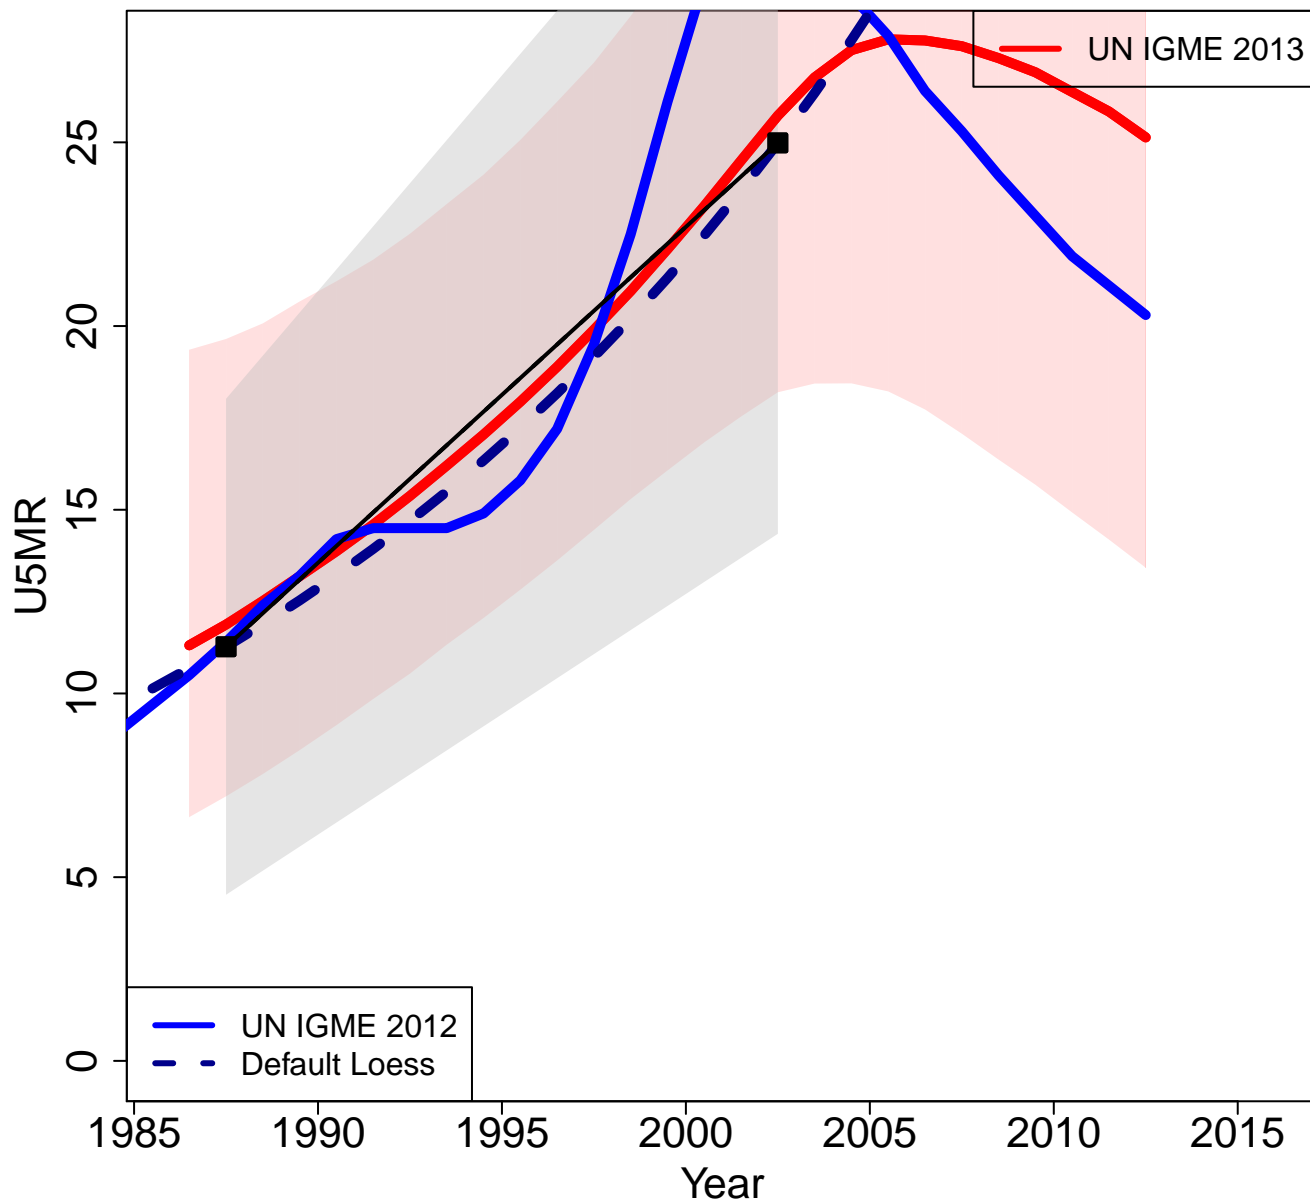

# Zoomed in

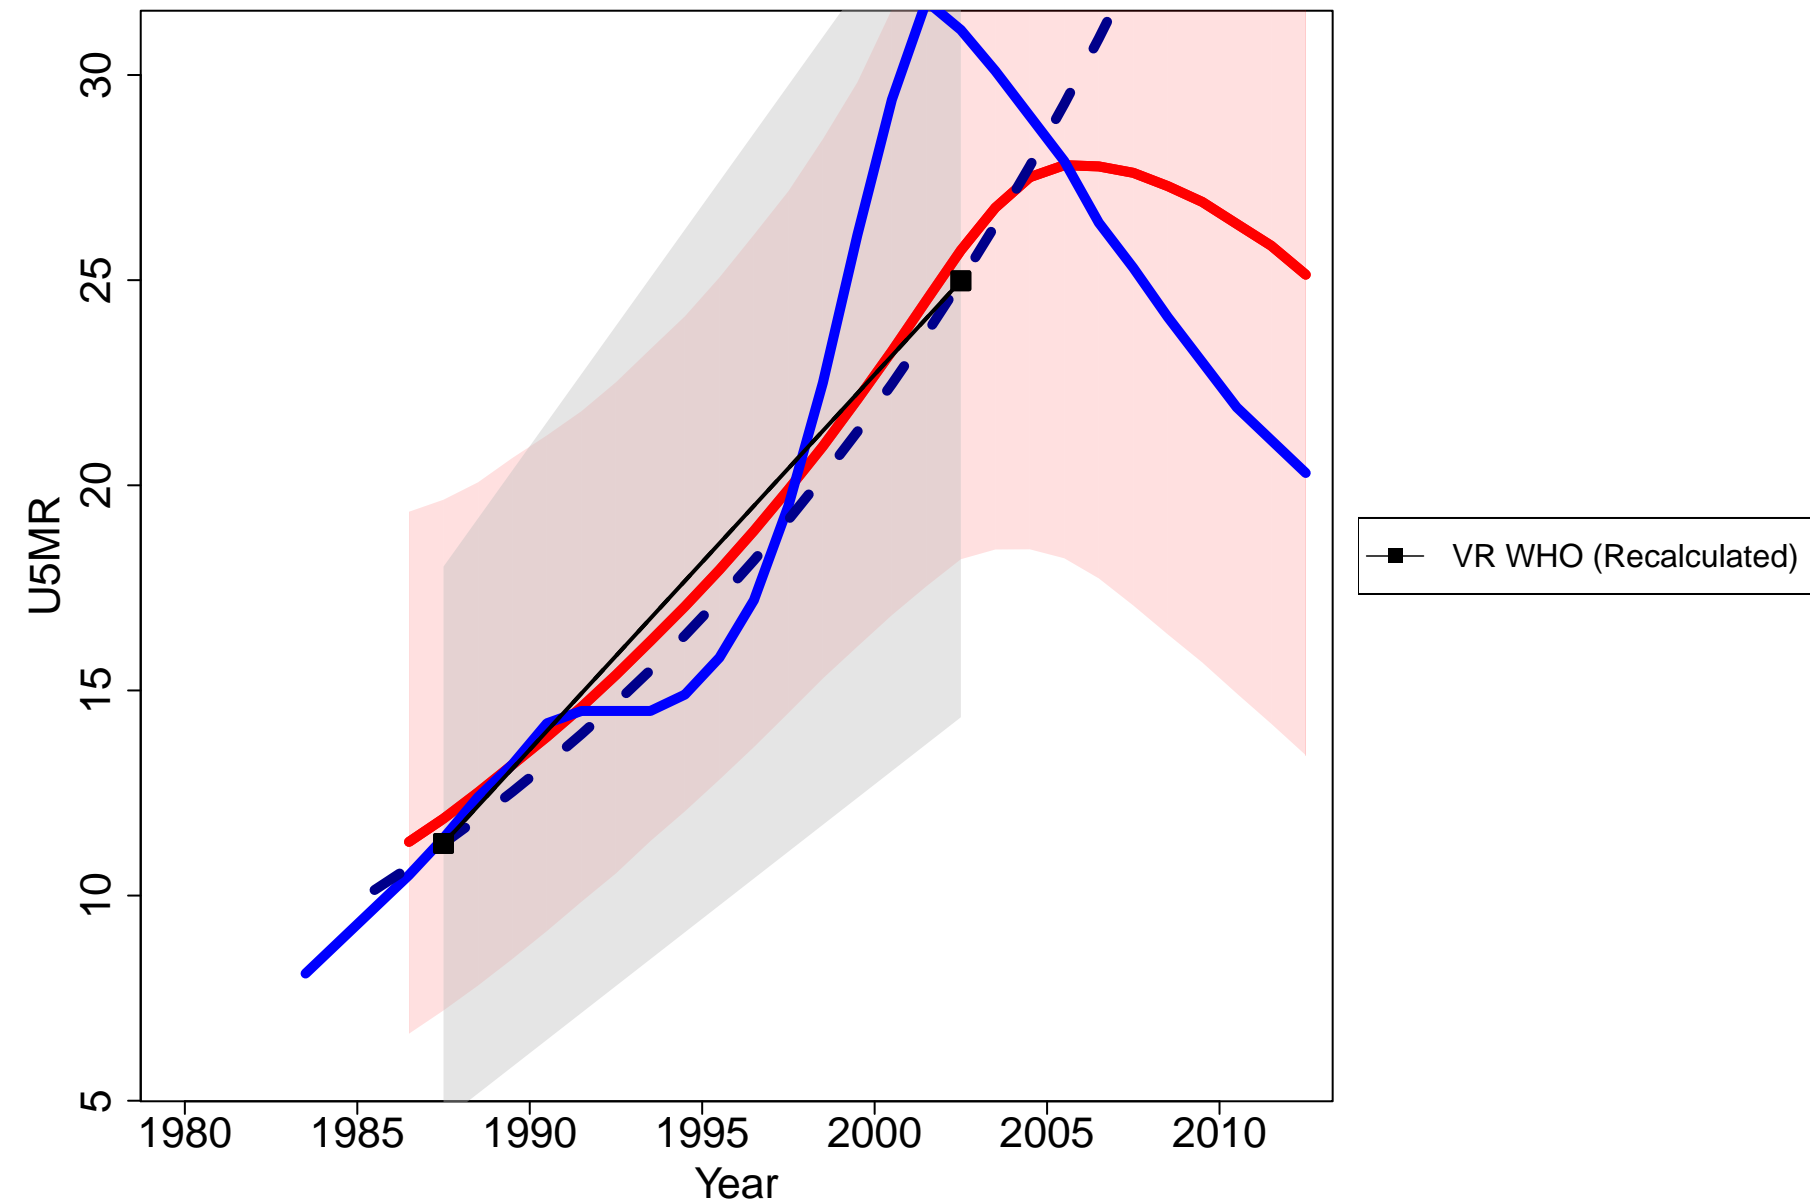



State of Palestine

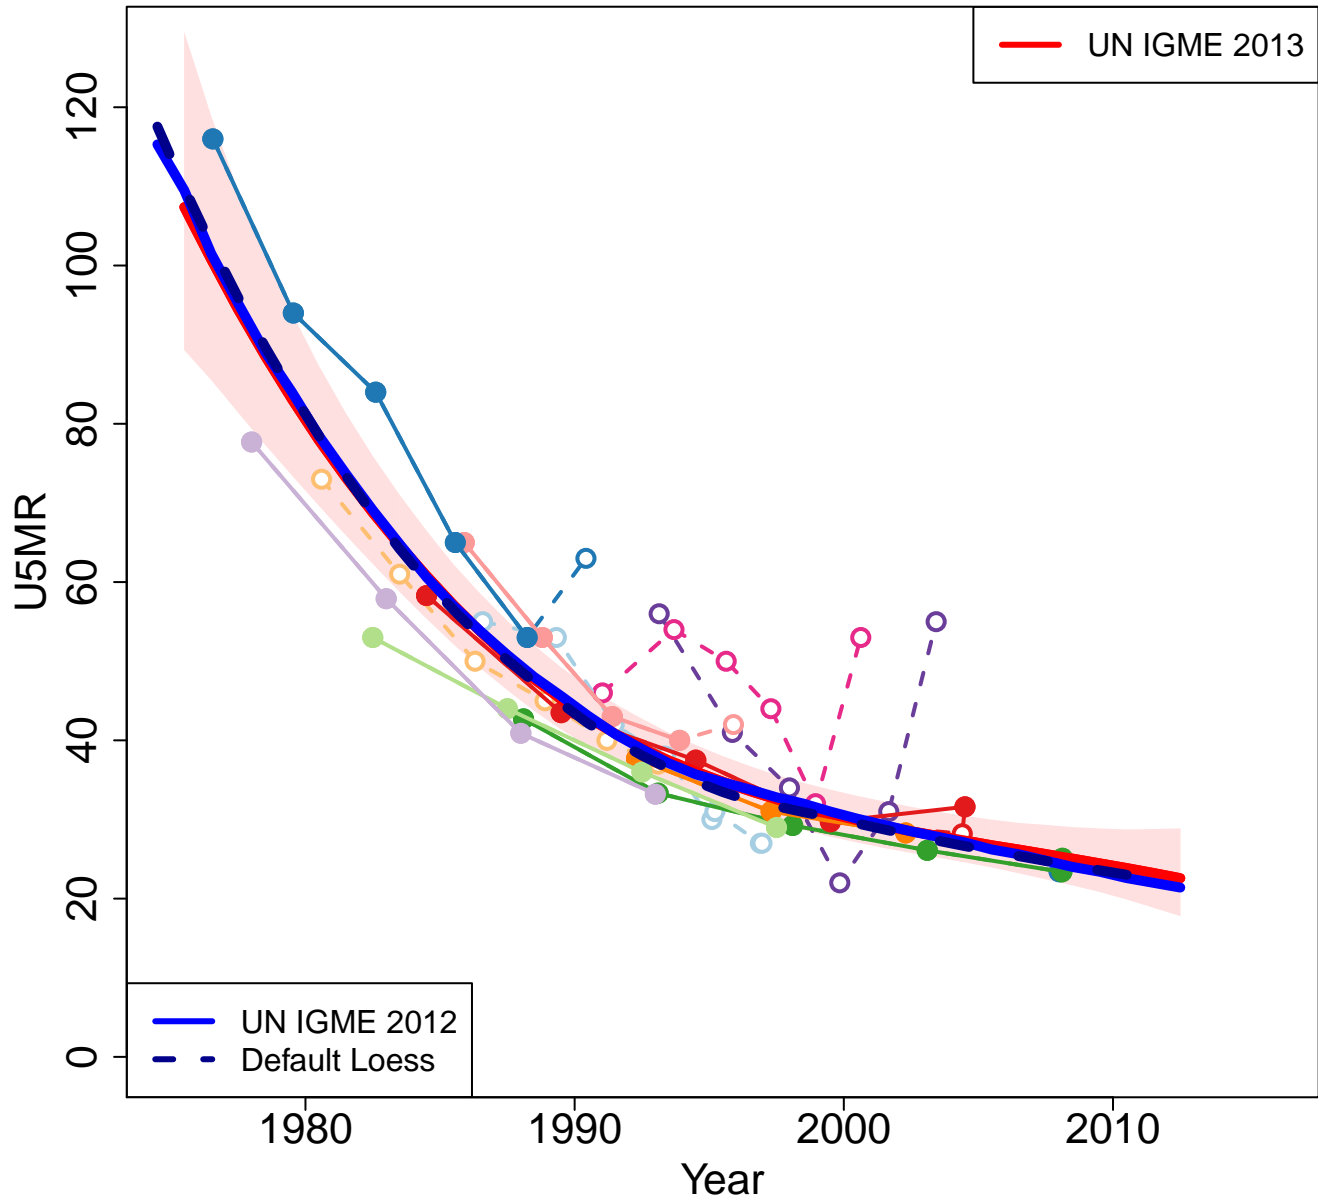

Zoomed in

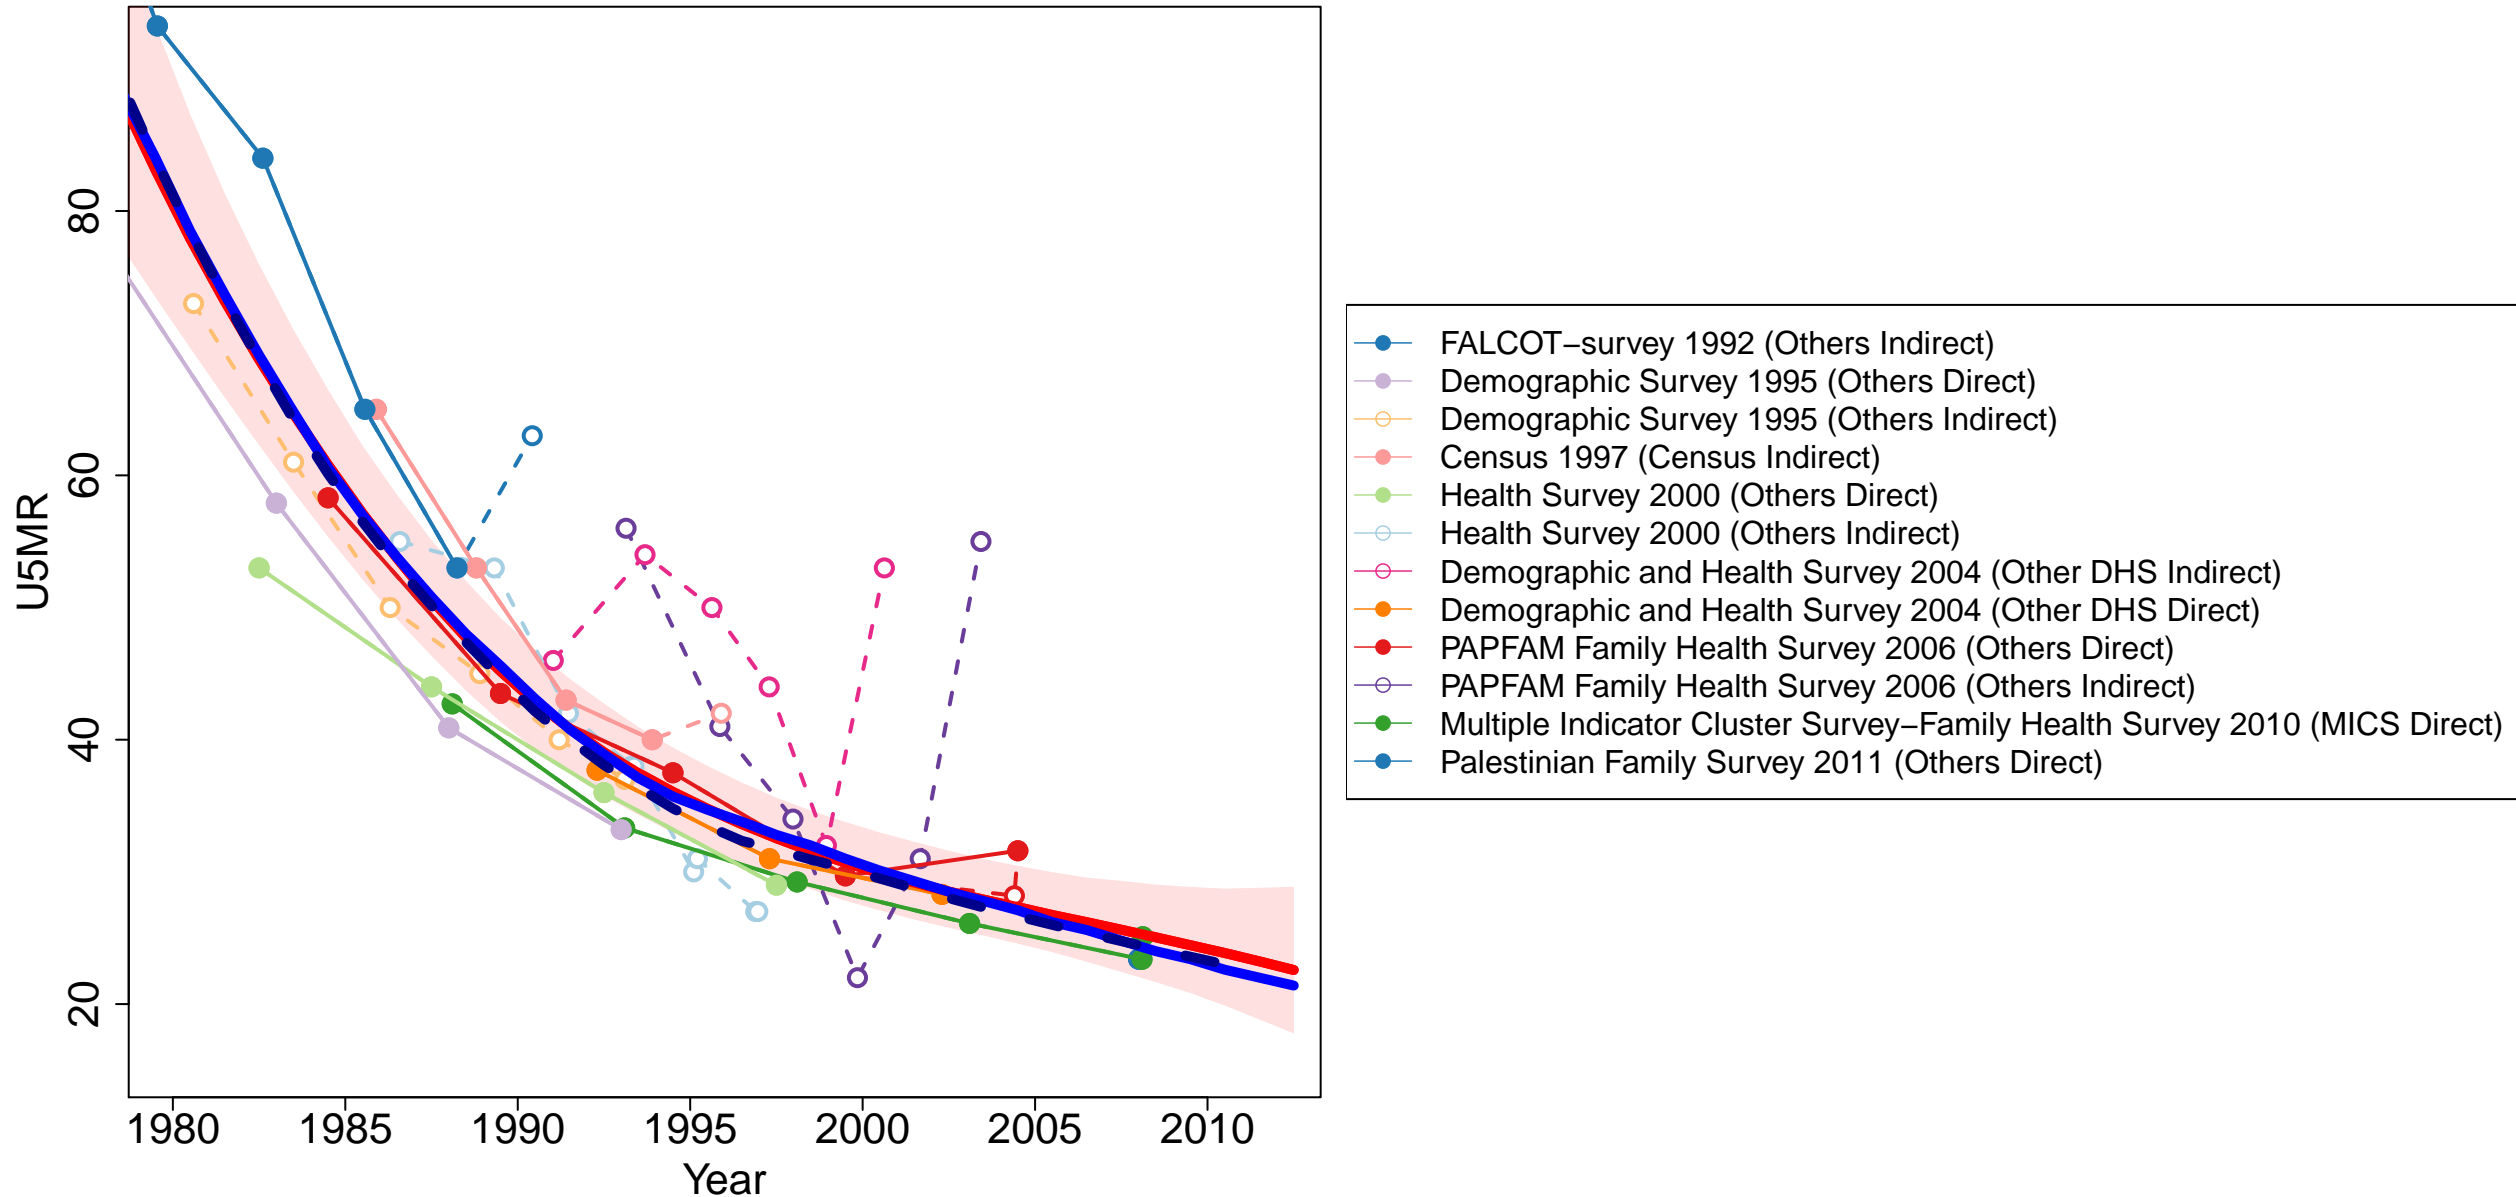

# Oman

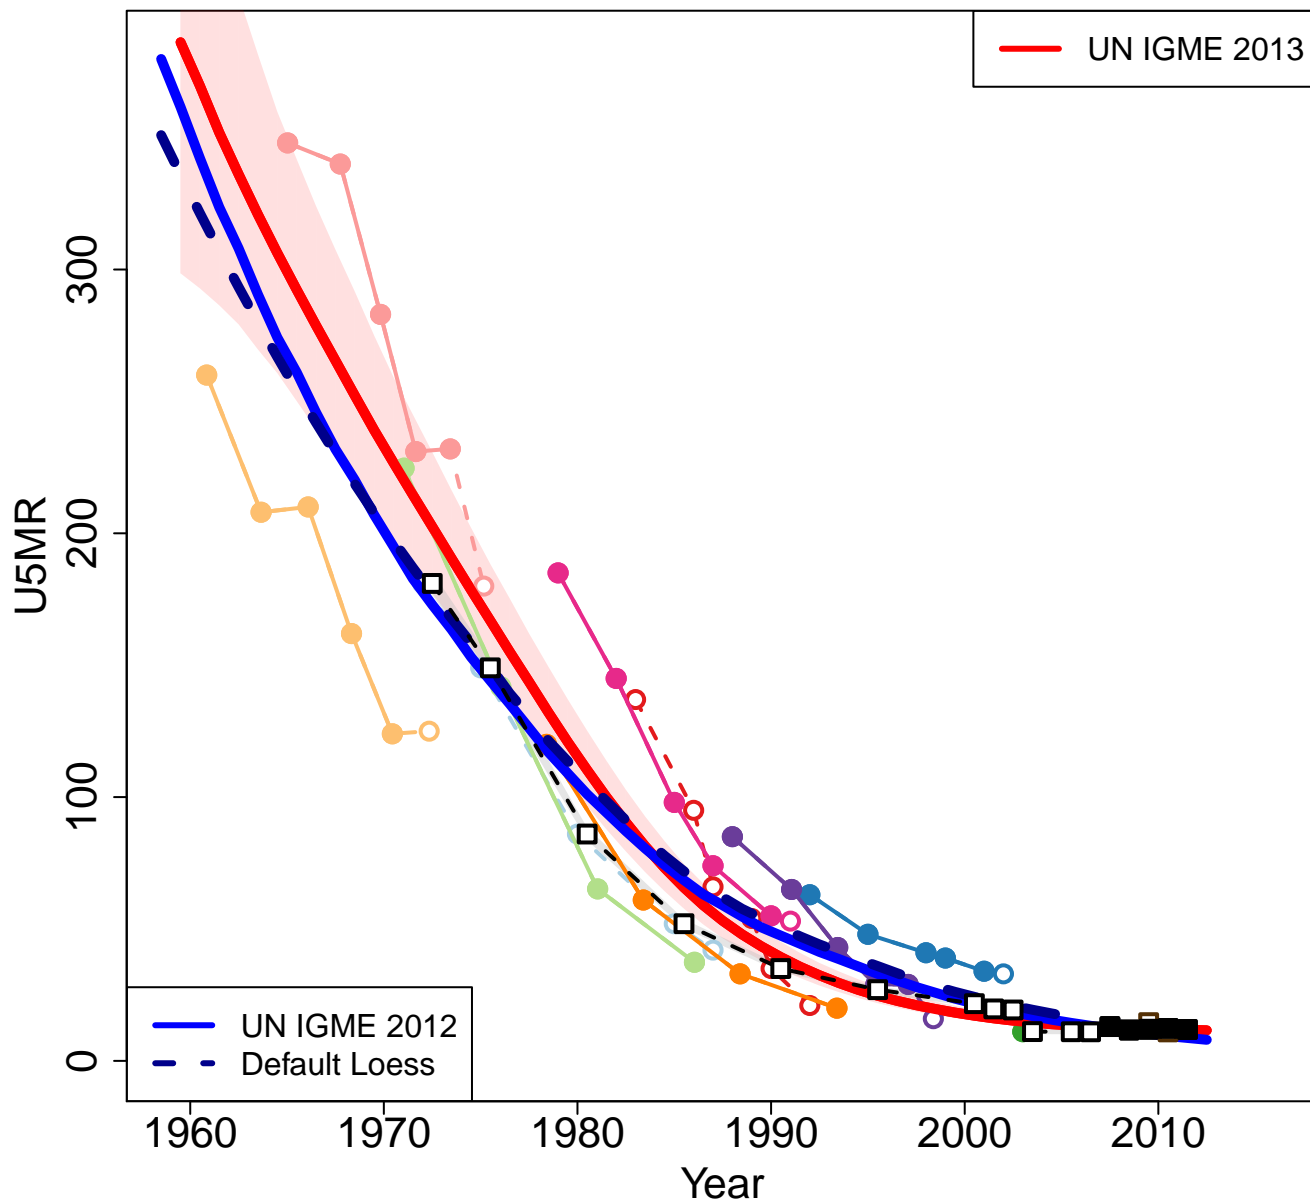

# Zoomed in

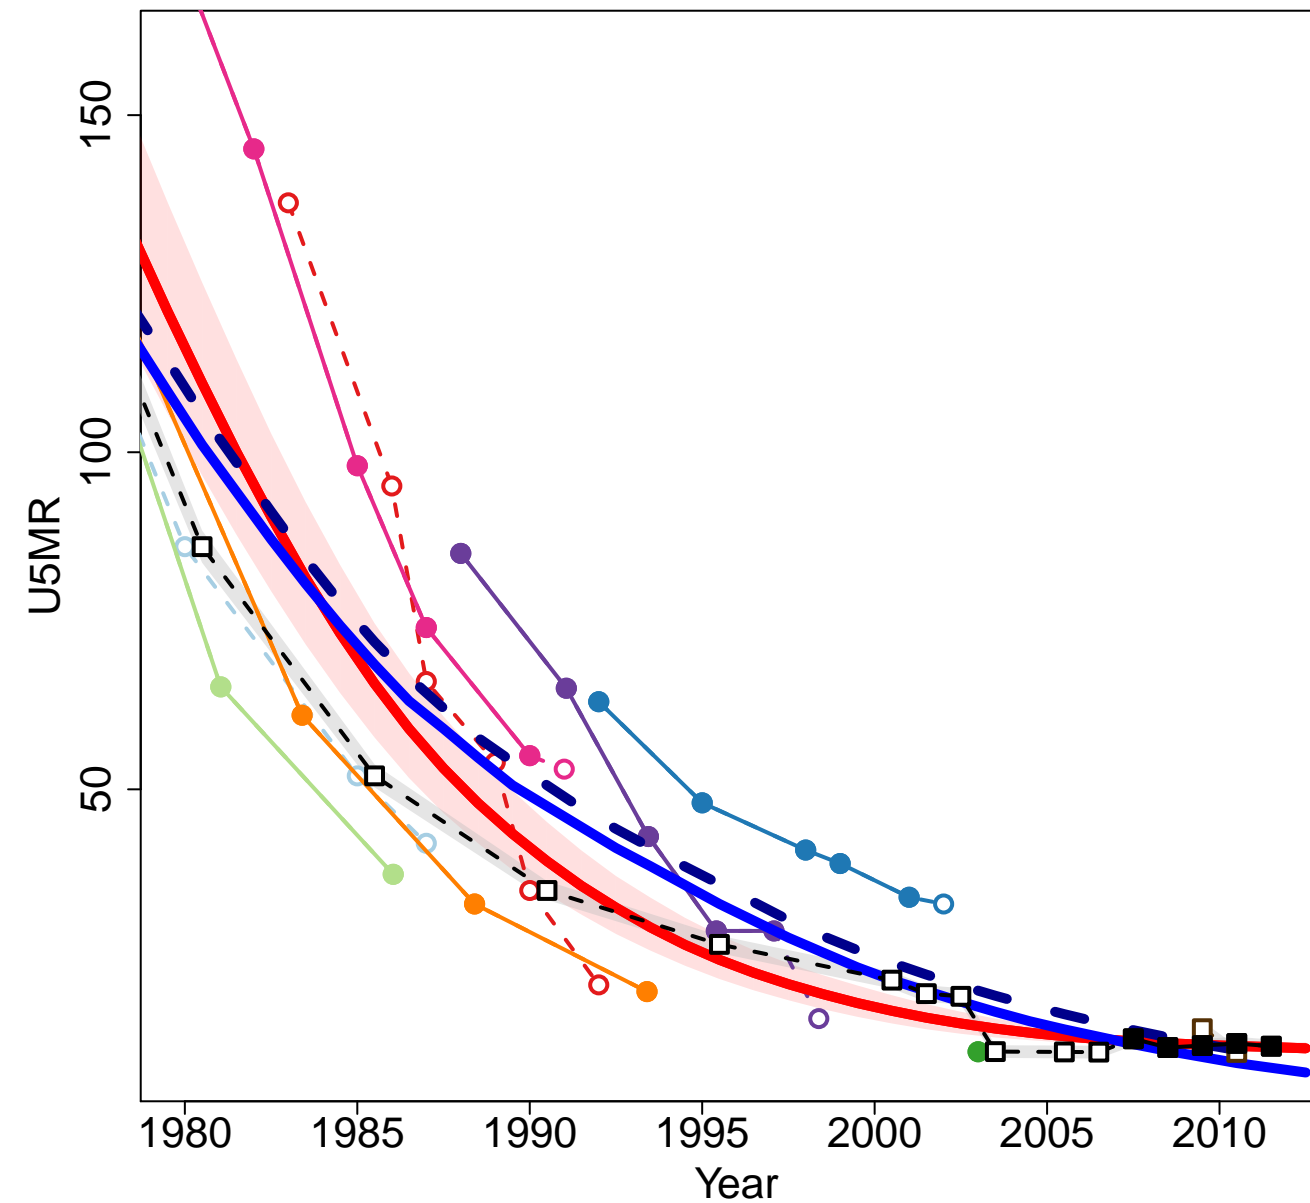

- Socio-Demographic Survey in 5 towns 1975 (Others Indirect)
- Socio-Demographic Survey 1977-1979 (Others Indirect)
- Child Health Survey 1988 (Others Direct)
- Child Health Survey 1988 (Others Indirect)
- Census 1993 (Census Indirect)
- Family Health Survey 1995 (Others Direct)
- Family Health Survey 1995 (Others Indirect)
- Comprehensive Health Survey for Evaluation and Reproductive Health 2000 (Others In
- Census 2003 (Others Household Deaths)
- Census 2003 (Census Indirect)
- VR WHO
- VR Data from Ministry of Health Annual Health Report

# Pakistan

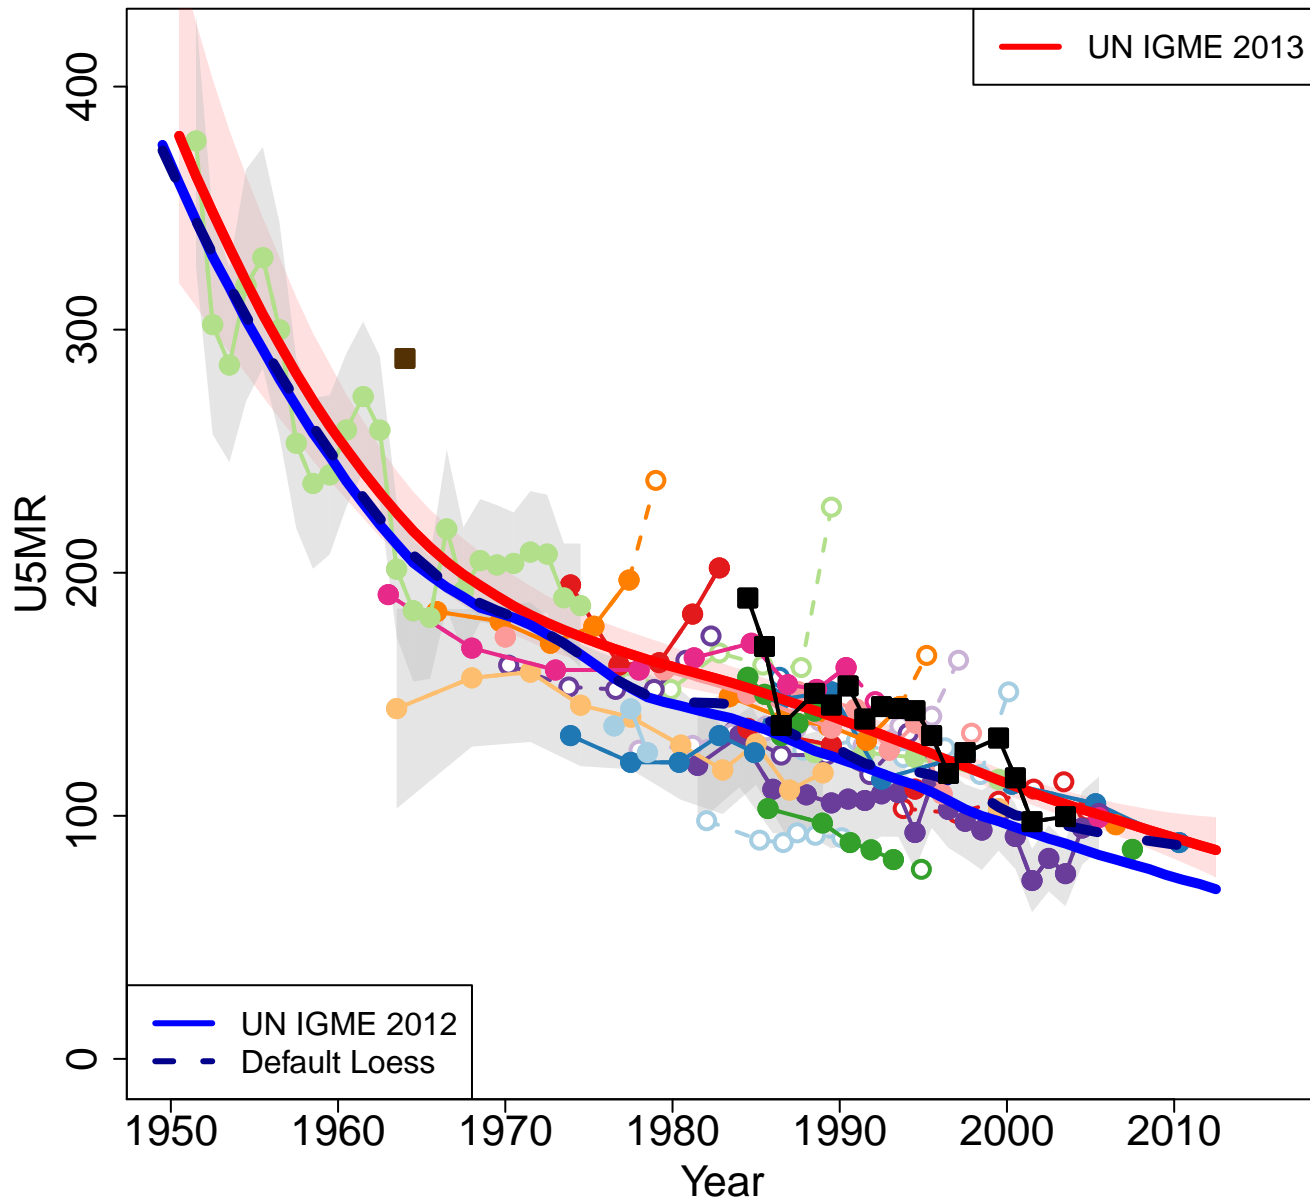

# Zoomed in

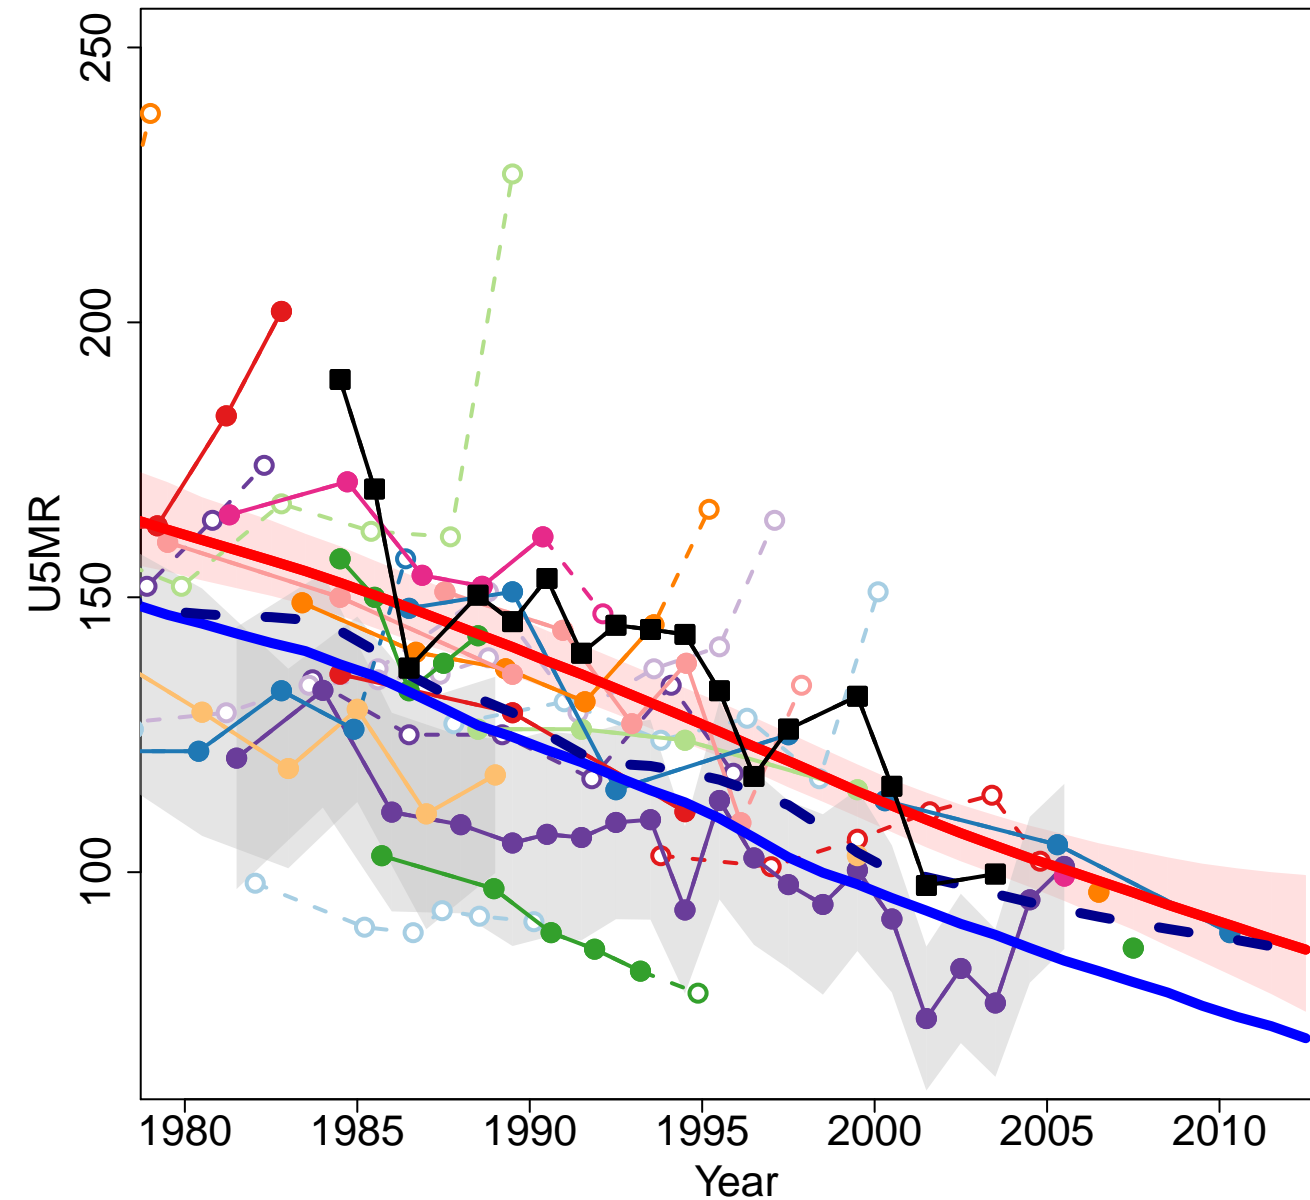

- Population Growth Survey I 1971 (Others Direct)
- World Fertility Survey 1975 (Other DHS Direct)
- Population Growth Survey II 1976–1978 (Others Direct)
- Labour Force and Migration Survey 1980 (Others Direct)
- Census 1981 (Census Indirect)
- Contraceptive Prevalence Survey 1984 (Others Indirect)
- Demographic Survey 1984 (Others Indirect)
- Demographic Survey 1988 (Others Direct)
- Demographic Survey 1988 (Others Indirect)
- Demographic and Health Survey 1990–1991 (DHS Indirect)
- Demographic and Health Survey 1990–1991 (DHS Direct)
- Living Standards Survey 1991 (Others Direct)
- Living Standards Survey 1991 (Others Indirect)
- Contraceptive Prevalence Survey 1993 (Others Indirect)
- Contraceptive Prevalence Survey 1994–1995 (Others Indirect)
- Integrated Household Survey 1996 (Others Indirect)
- Pakistan Fertility and Family Planning Survey 1996 (Others Direct)
- Pakistan Fertility and Family Planning Survey 1996 (Others Indirect)
- Census 1998 (Census Indirect)
- Integrated Household Survey 1998 (Others Direct)
- Integrated Household Survey 1998 (Others Indirect)
- Reproductive Health and Family Planning Survey 2000–2001 (Others Direct)
- Reproductive Health and Family Planning Survey 2000–2001 (Others Indirect)
- Integrated Household Survey 2001 (Others Direct)
- Integrated Household Survey 2001 (Others Indirect)
- Pakistan Demographic Survey 2005 (Others Household Deaths)
- Pakistan Demographic Survey 2006 (Others Household Deaths)
- Demographic and Health Survey 2006–2007 (DHS Indirect)
- Demographic and Health Survey 2006–2007 (DHS Direct)
- Pakistan Demographic Survey 2007 (Others Household Deaths)
- Demographic and Health Survey 2012–2013 (DHS Direct)
- VR Pop Growth Est Expmt
- VR Pakistan Demographic Survey

# Palau

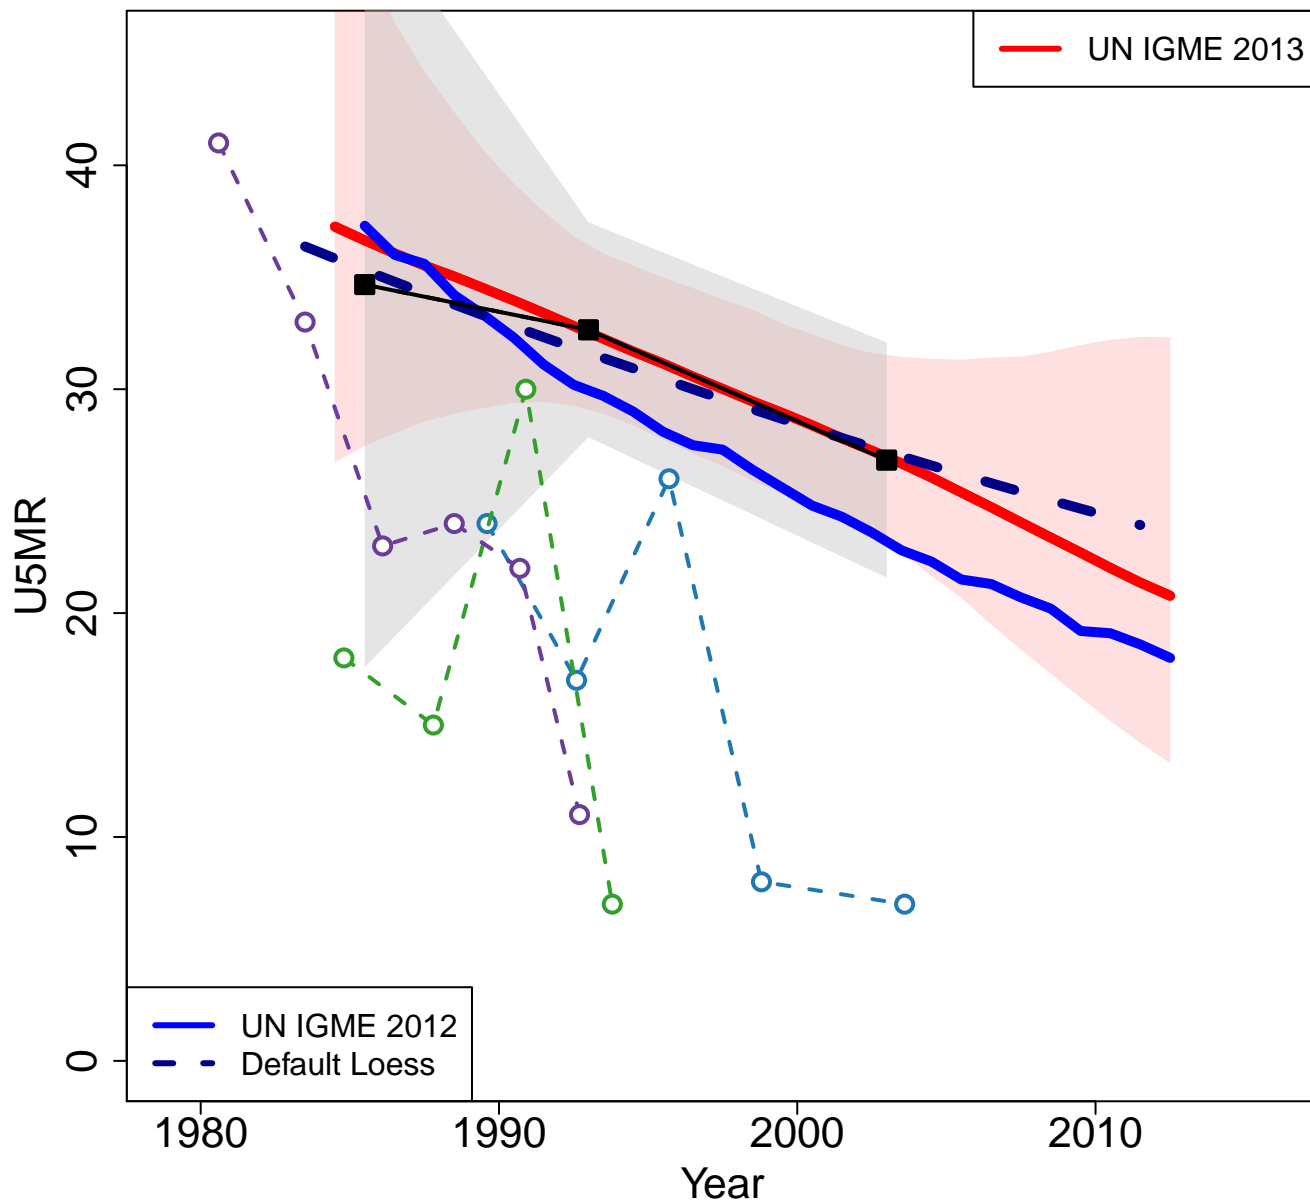

# Zoomed in

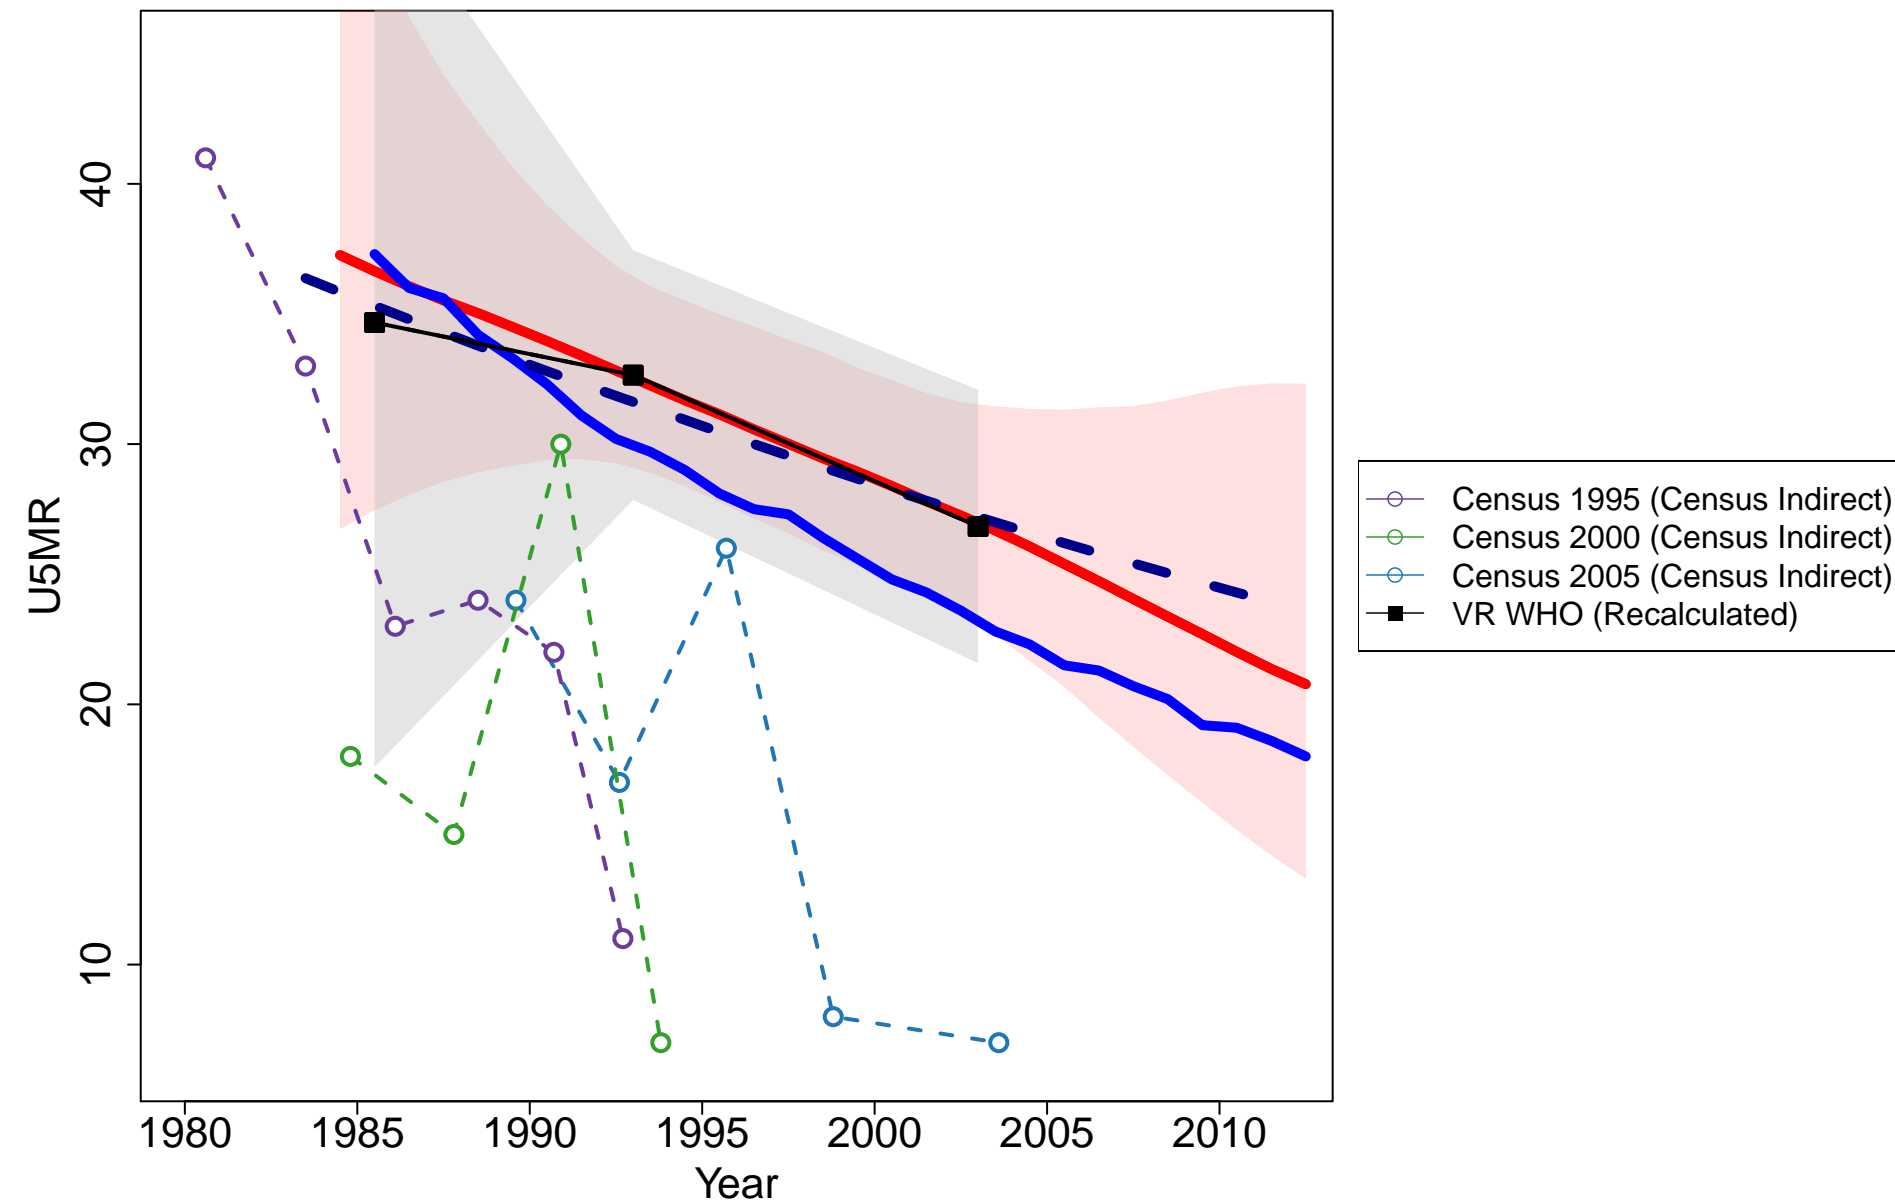

# Panama

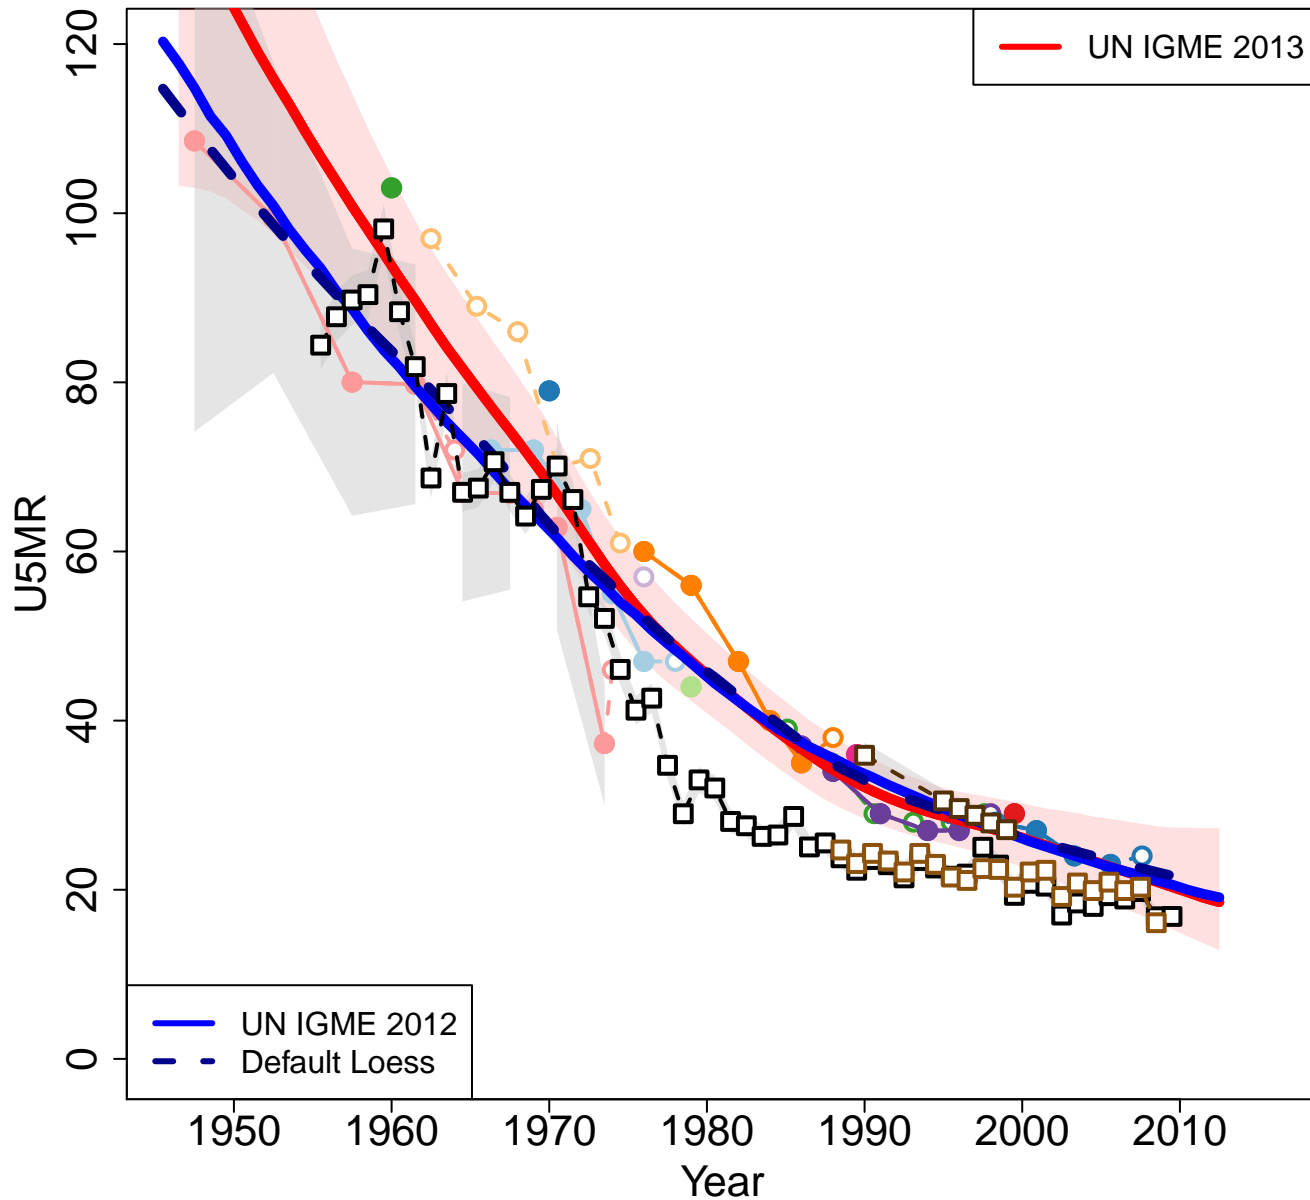

# Zoomed in

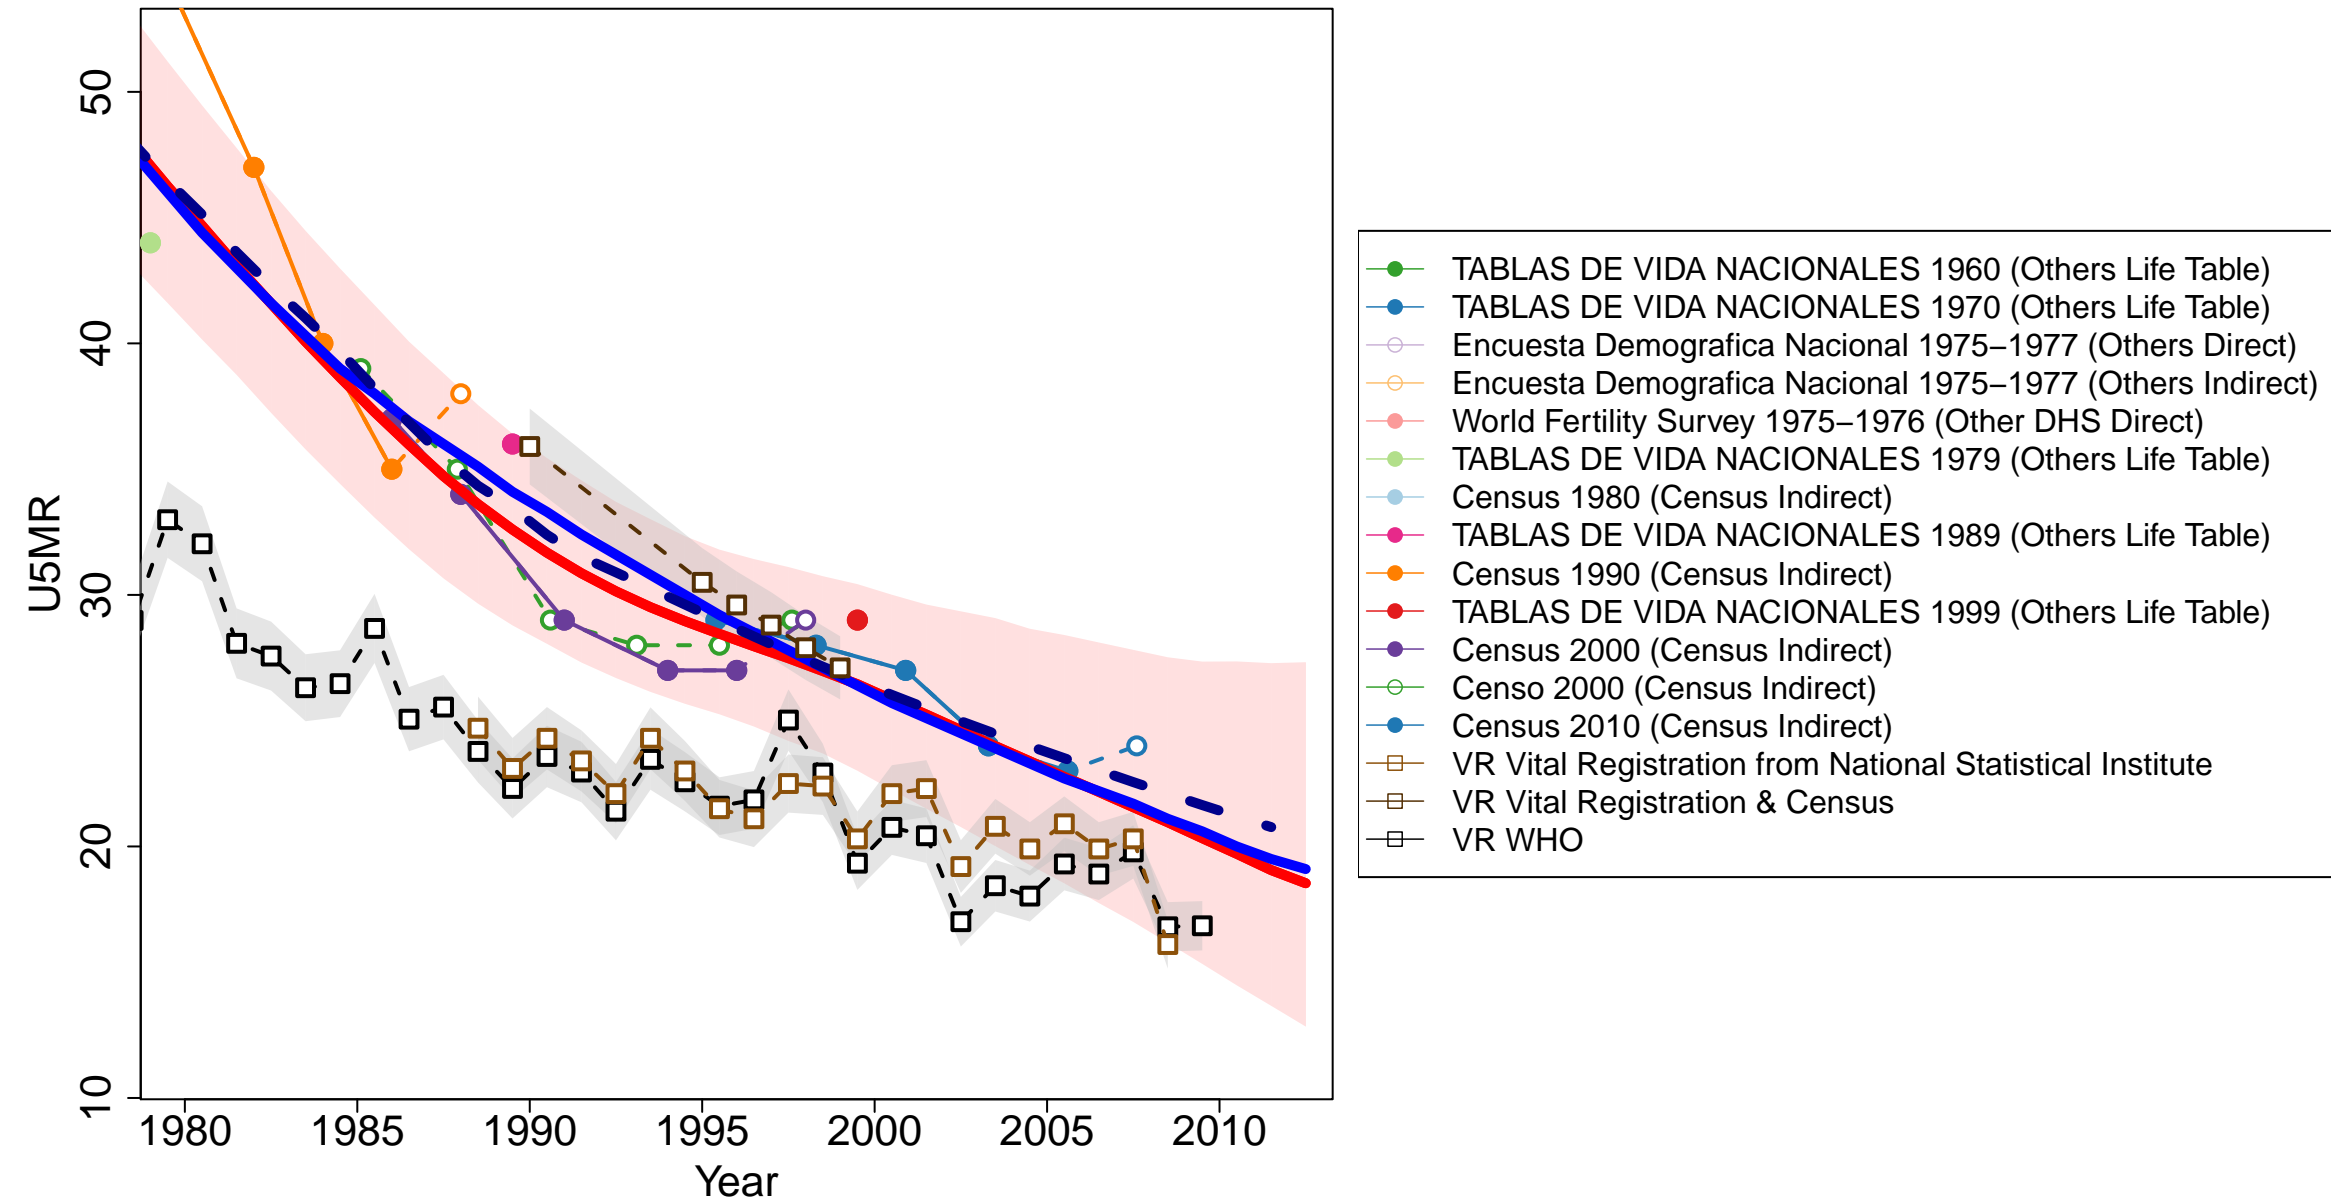

# Papua New Guinea

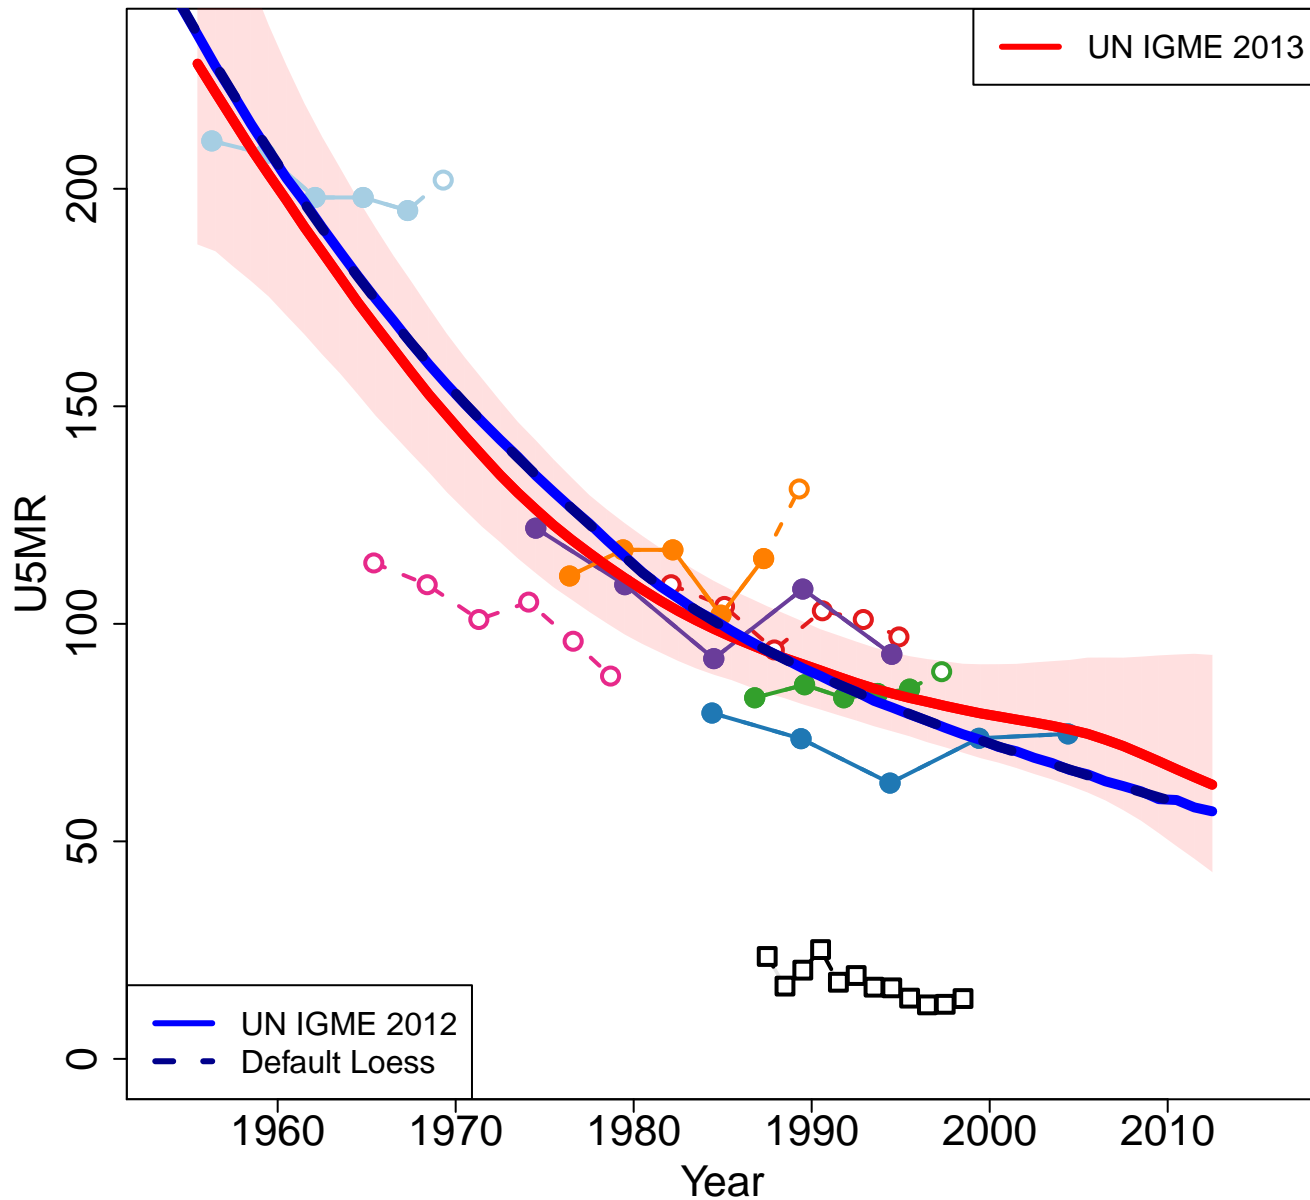

# Zoomed in

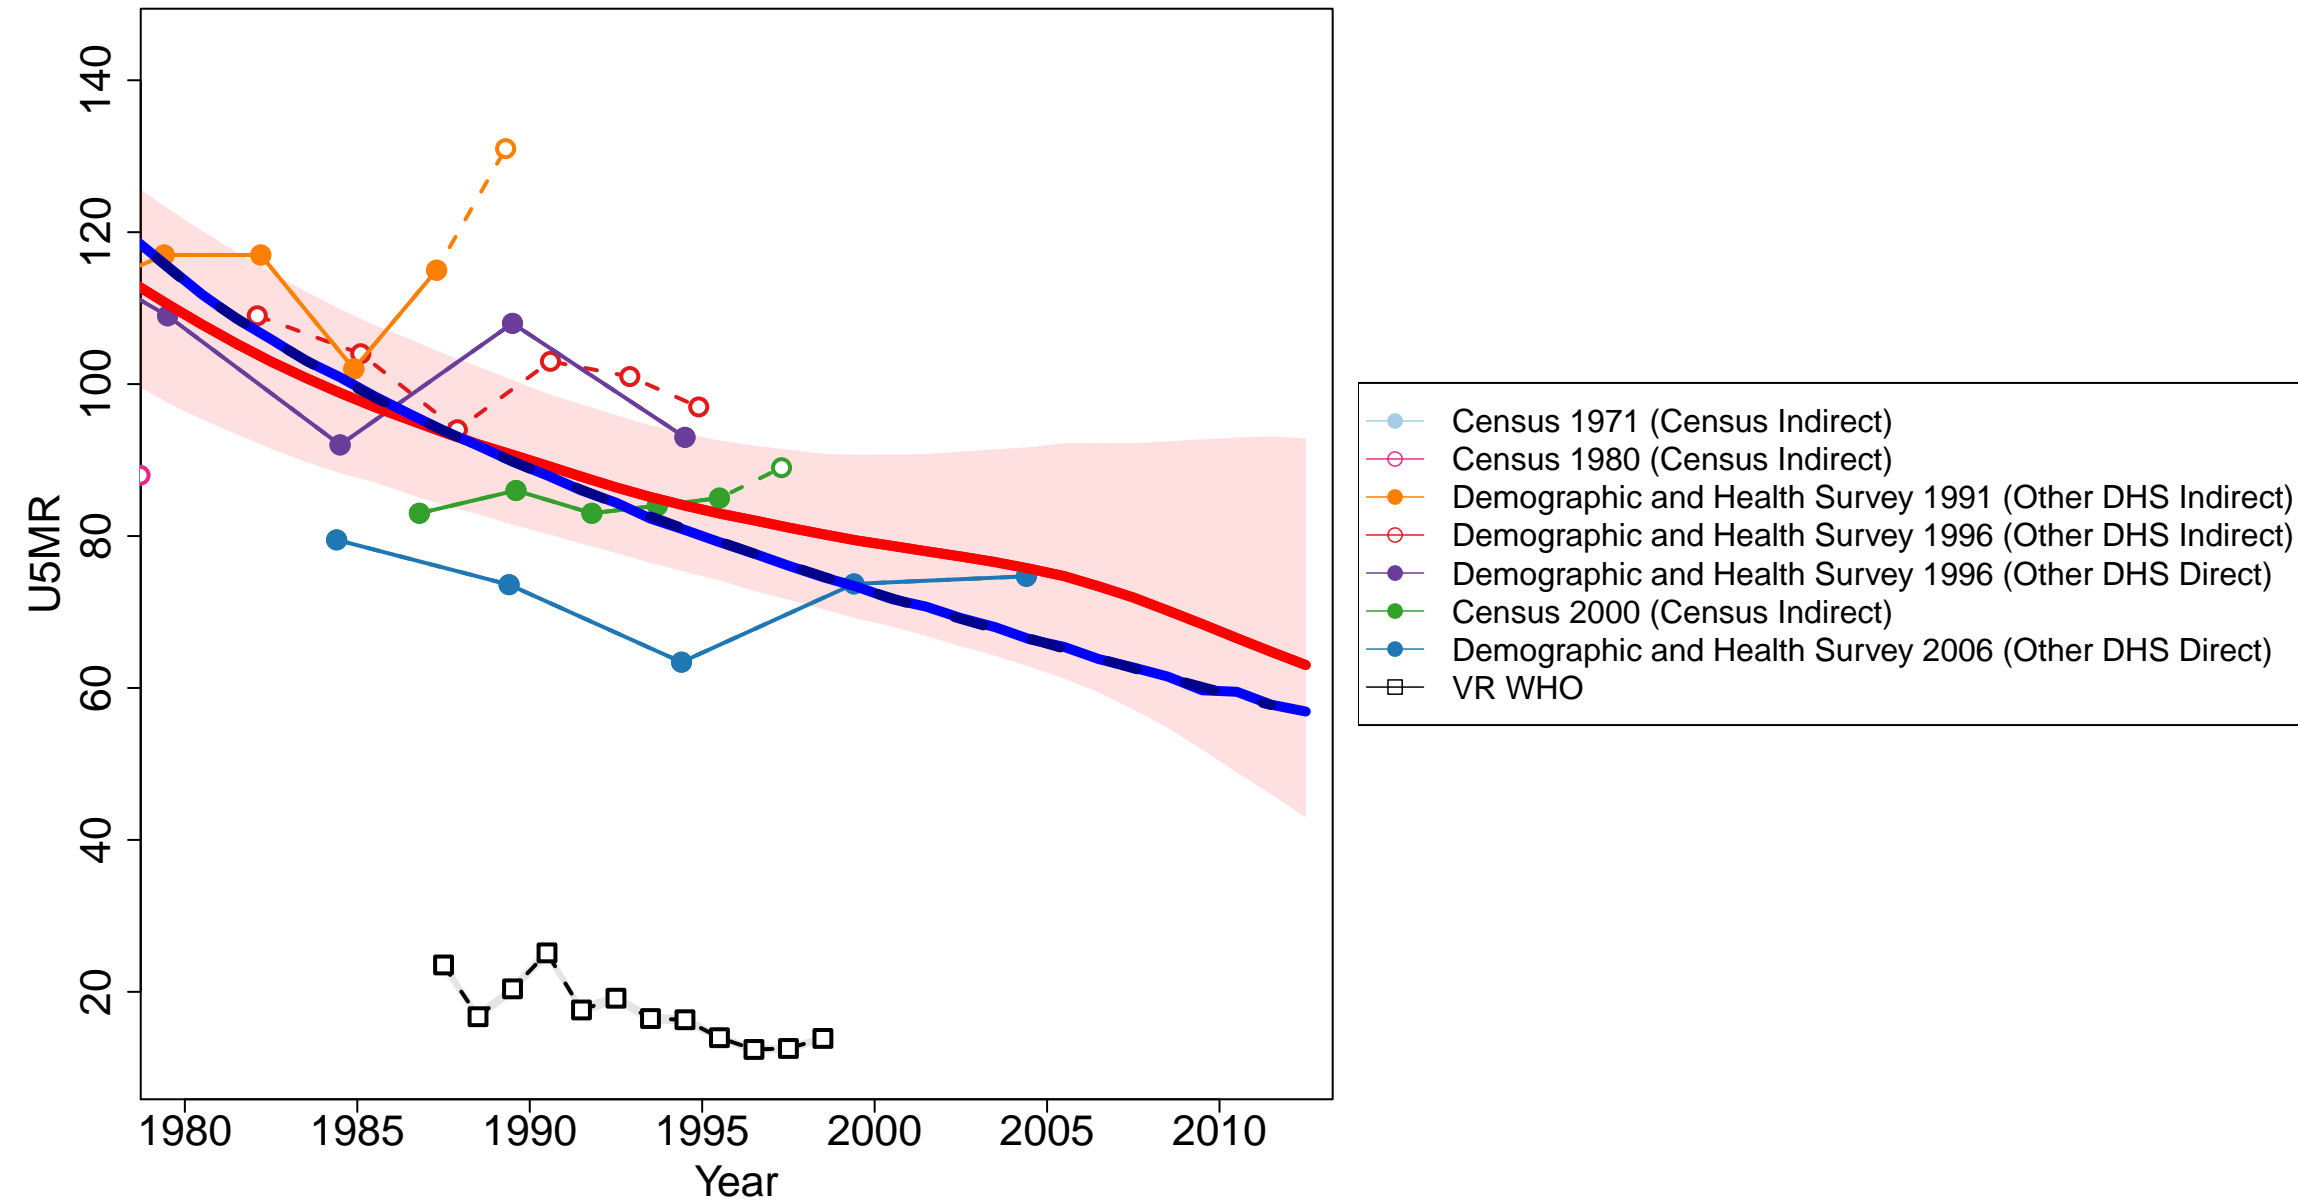

# Paraguay

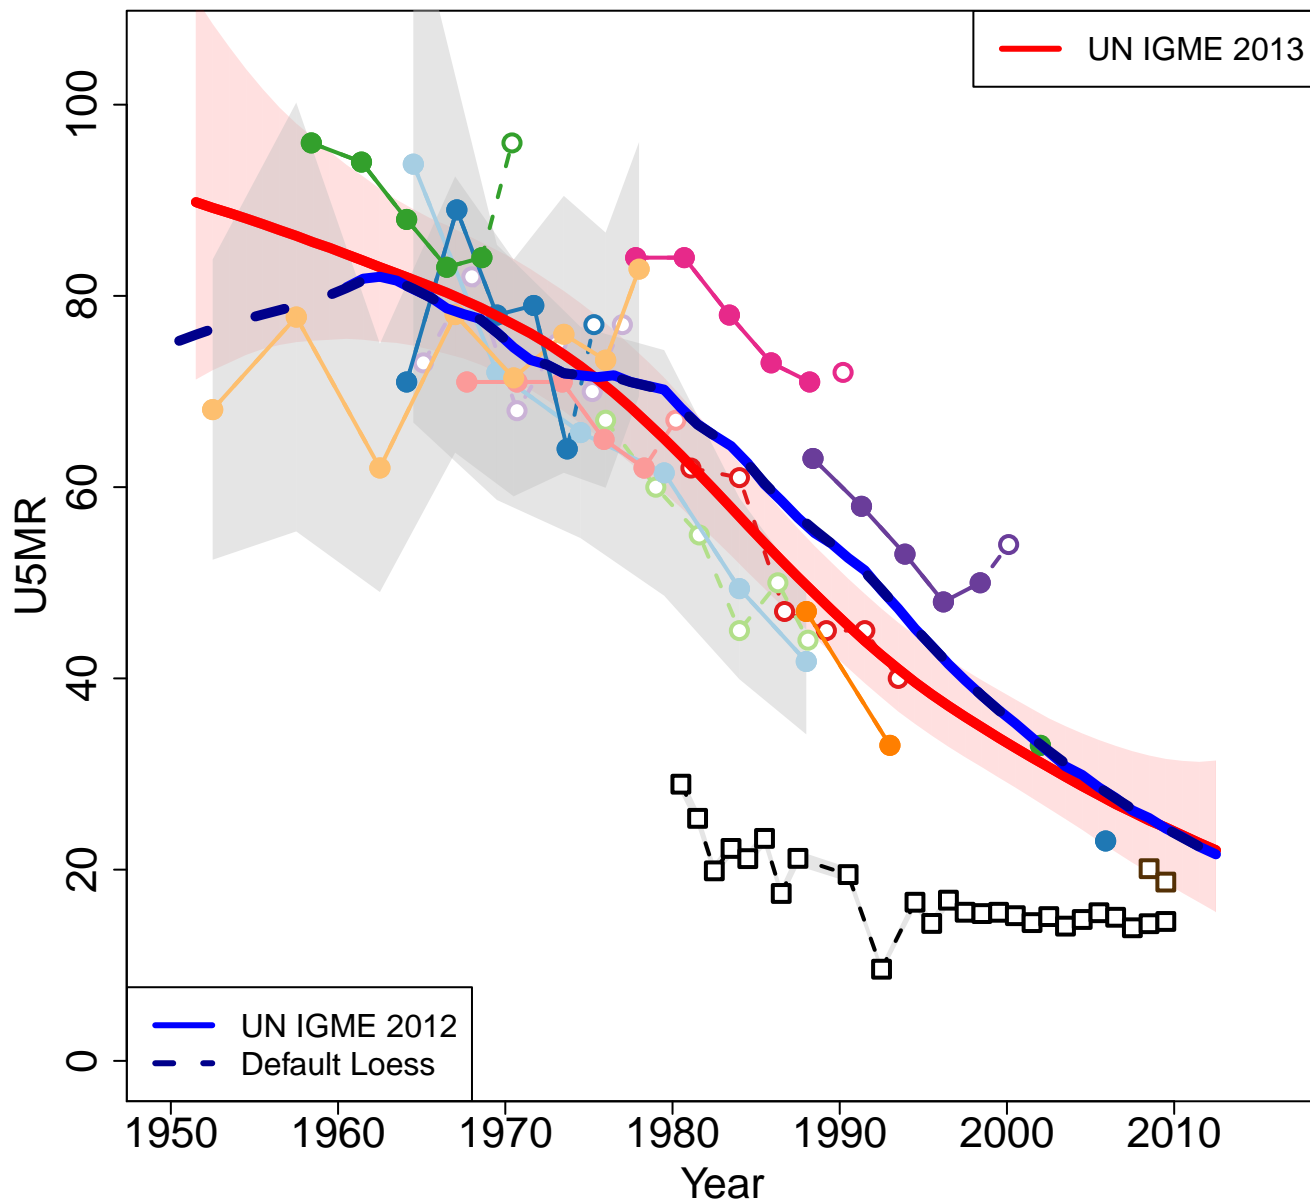

# Zoomed in

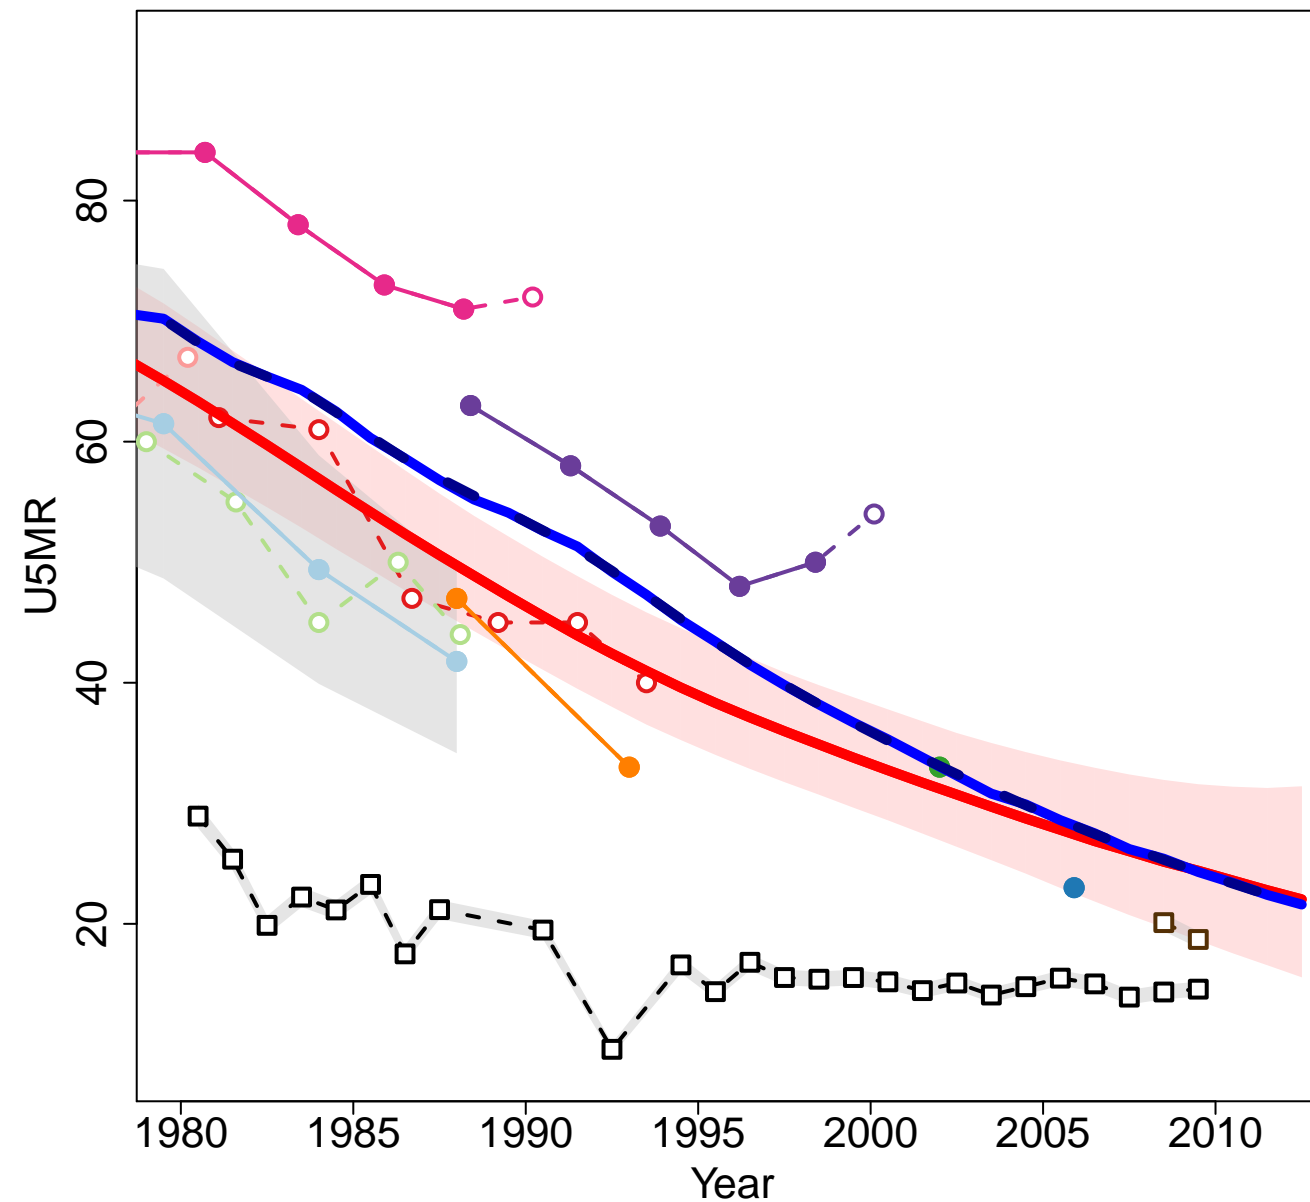

- Census 1972 (Census Indirect)
- Encuesta Nacional de Uso de Anticonceptivos 1977 (Others Indirect)
- Encuesta Nacional de Fecundidad 1979 (Other DHS Indirect)
- World Fertility Survey 1979 (Other DHS Direct)
- Census 1982 (Census Indirect)
- Demographic and Health Survey 1990 (DHS Indirect)
- Demographic and Health Survey 1990 (DHS Direct)
- Census 1992 (Census Indirect)
- Encuesta Nacional de Demografia y Salud Reproductiva (ENDSR) 1995–1996 (Others)
- Encuesta Nacional de Demografia y Salud Reproductiva (ENDSR) 1995–1996 (Others)
- Census 2002 (Census Indirect)
- RHS–CDC 2004 (Others Direct)
- Encuesta Nacional de Demografia y Salud Sexual y Reproductiva (ENDSSR) 2008 (Ot)
- VR VR Ministerio de Salud Pulblica y Bienestar Social – Departamento de Bioestadisiti
- VR WHO



# Peru

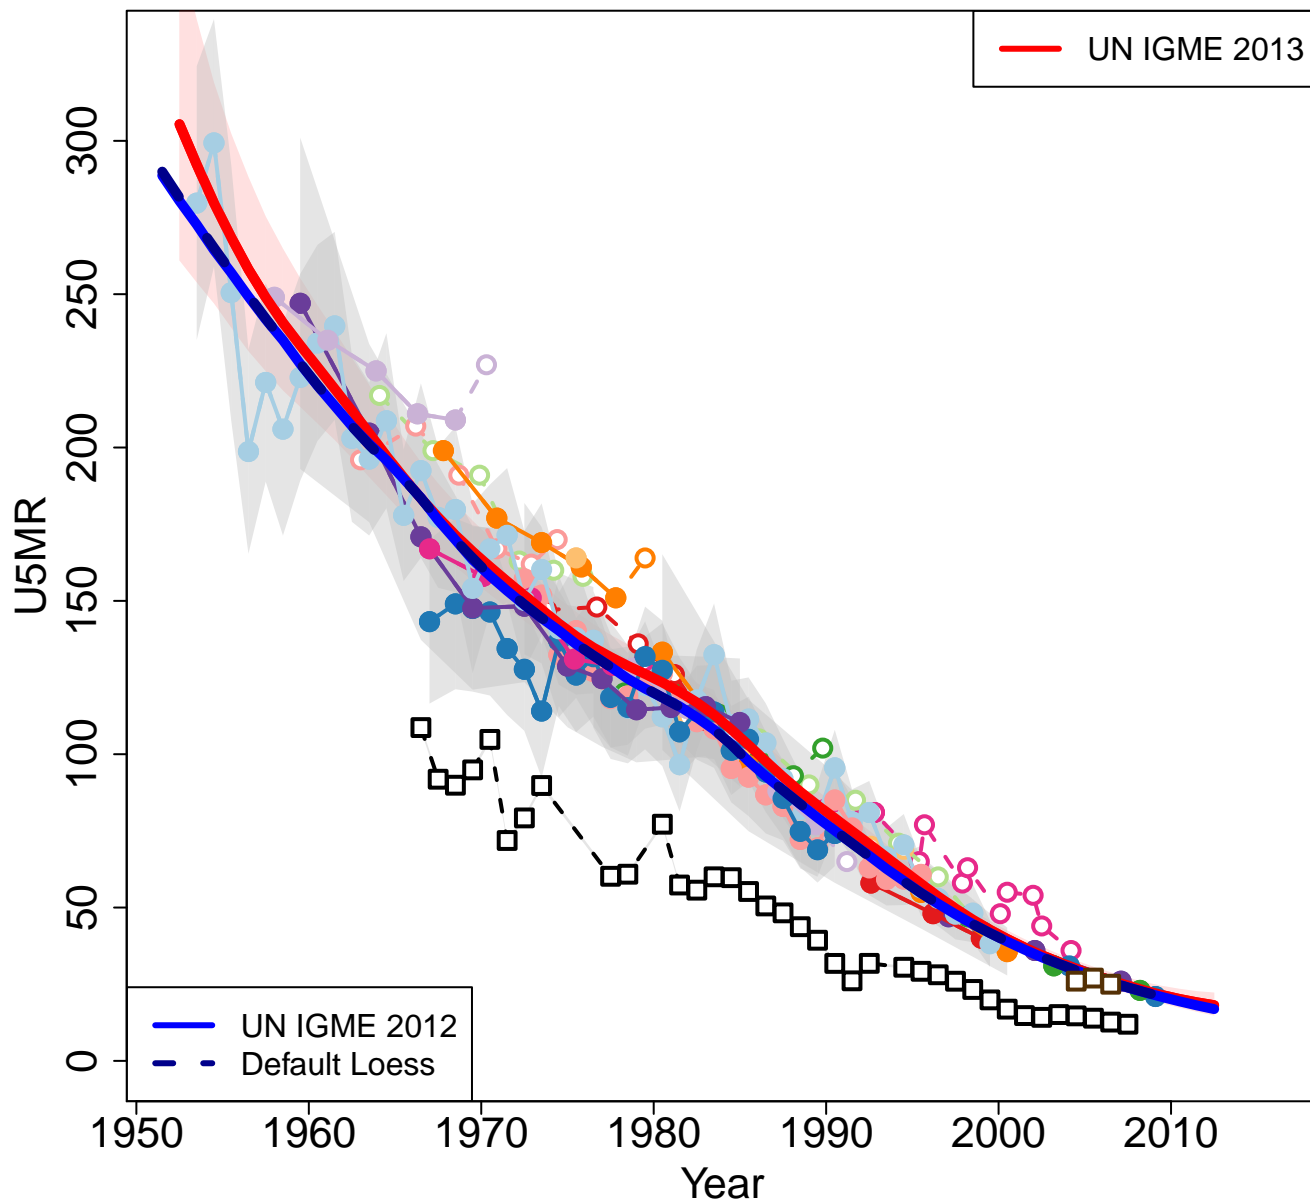

# Zoomed in

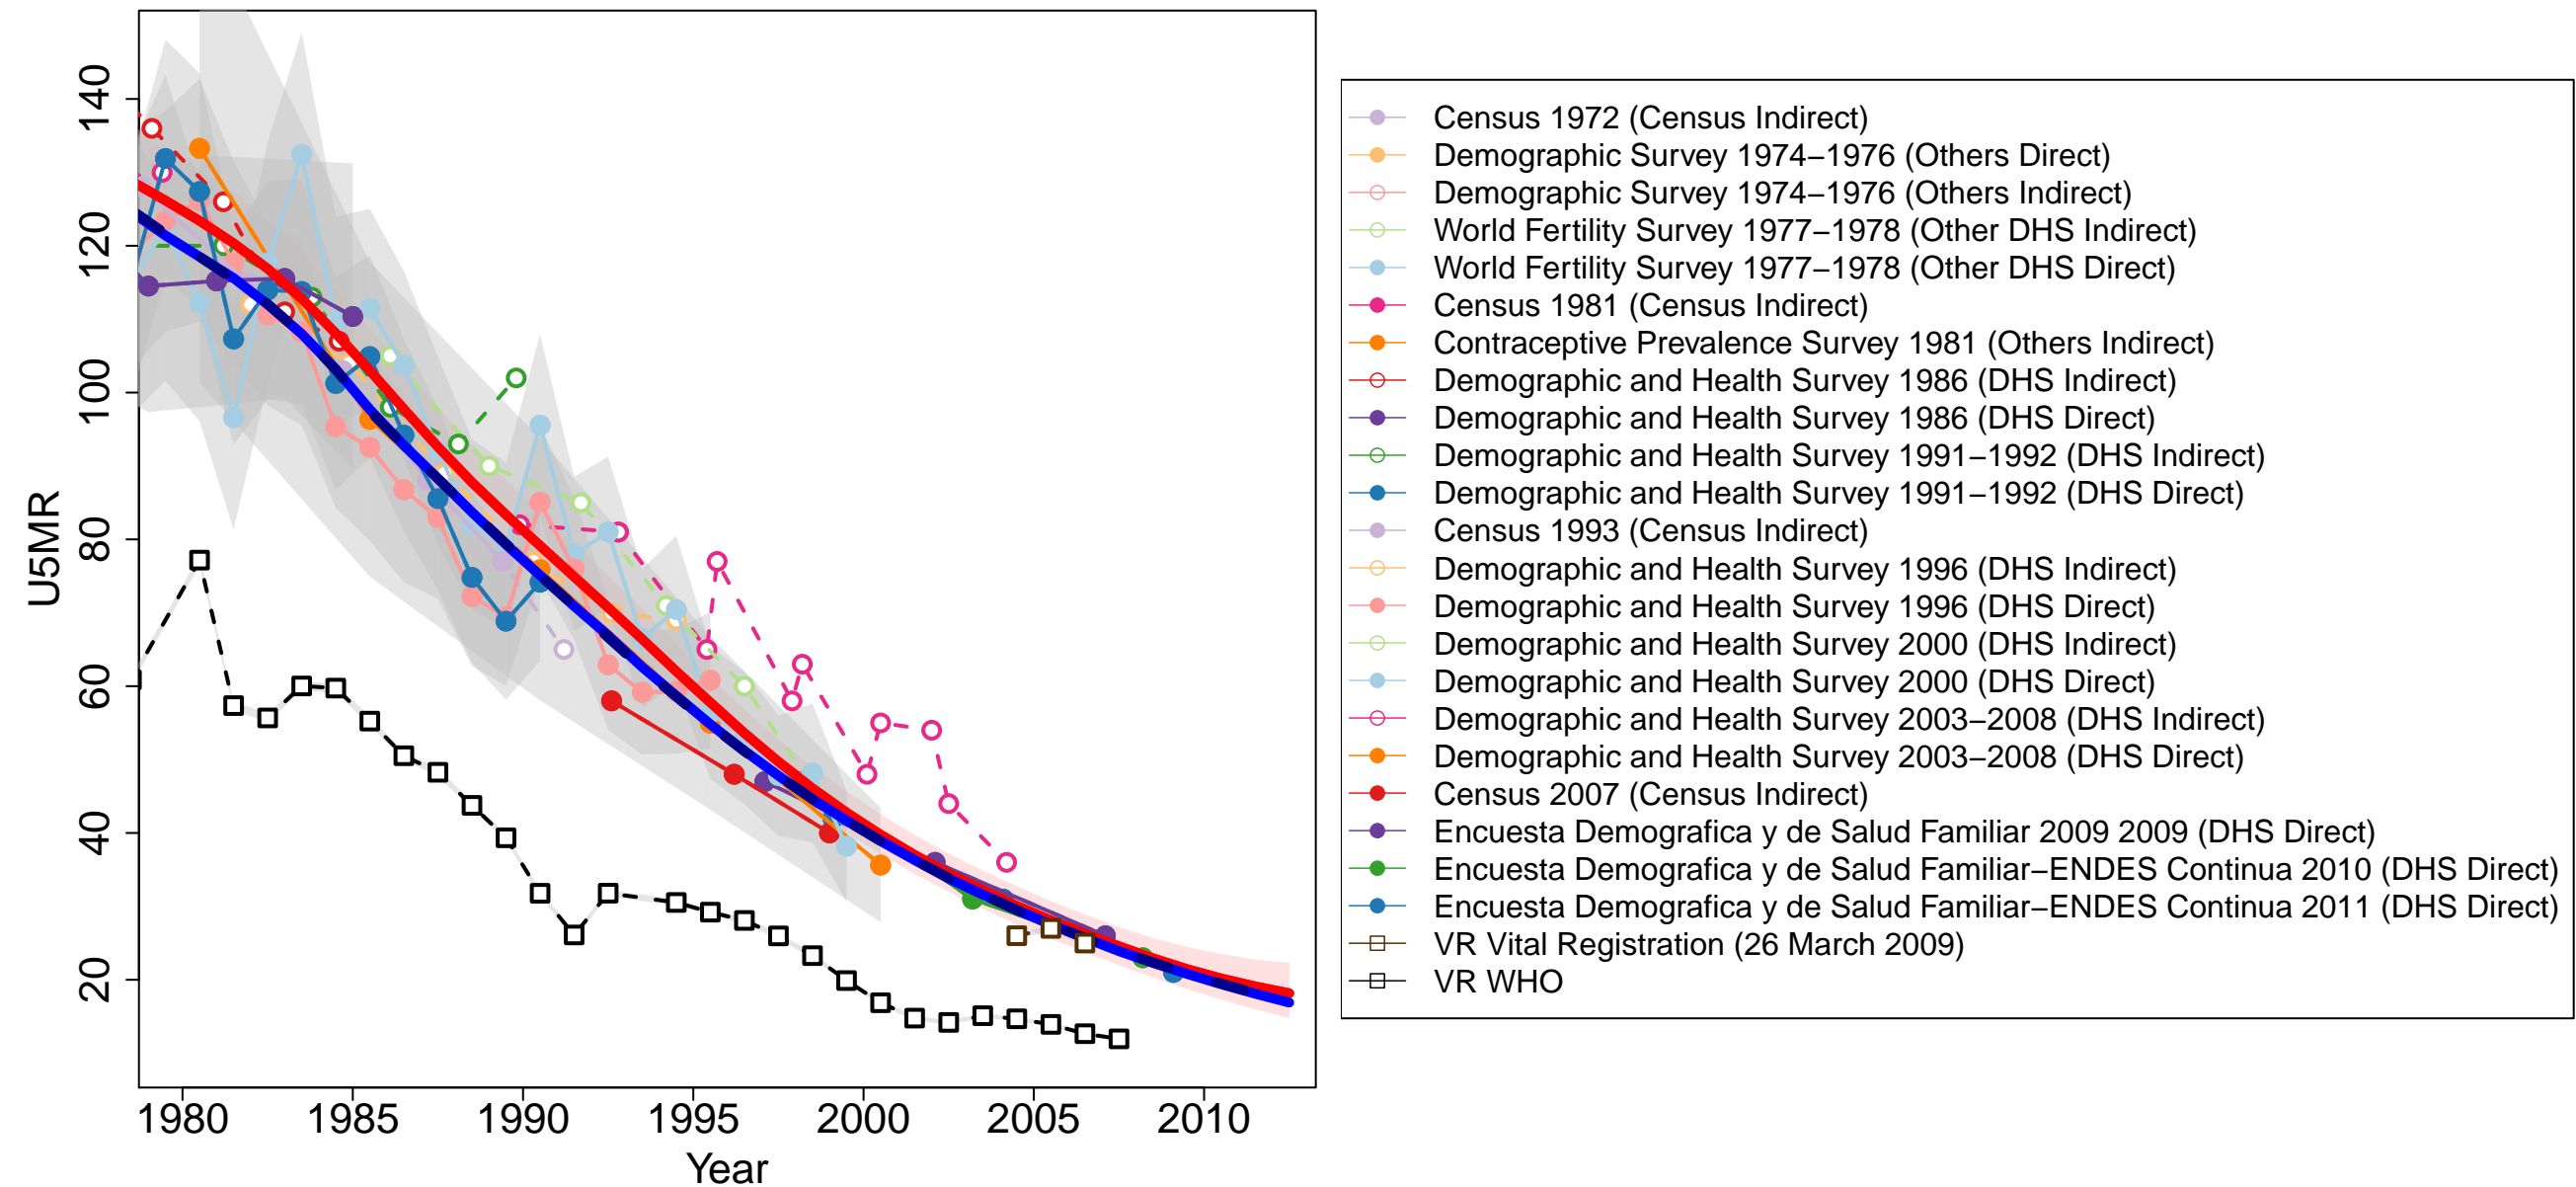

# Philippines

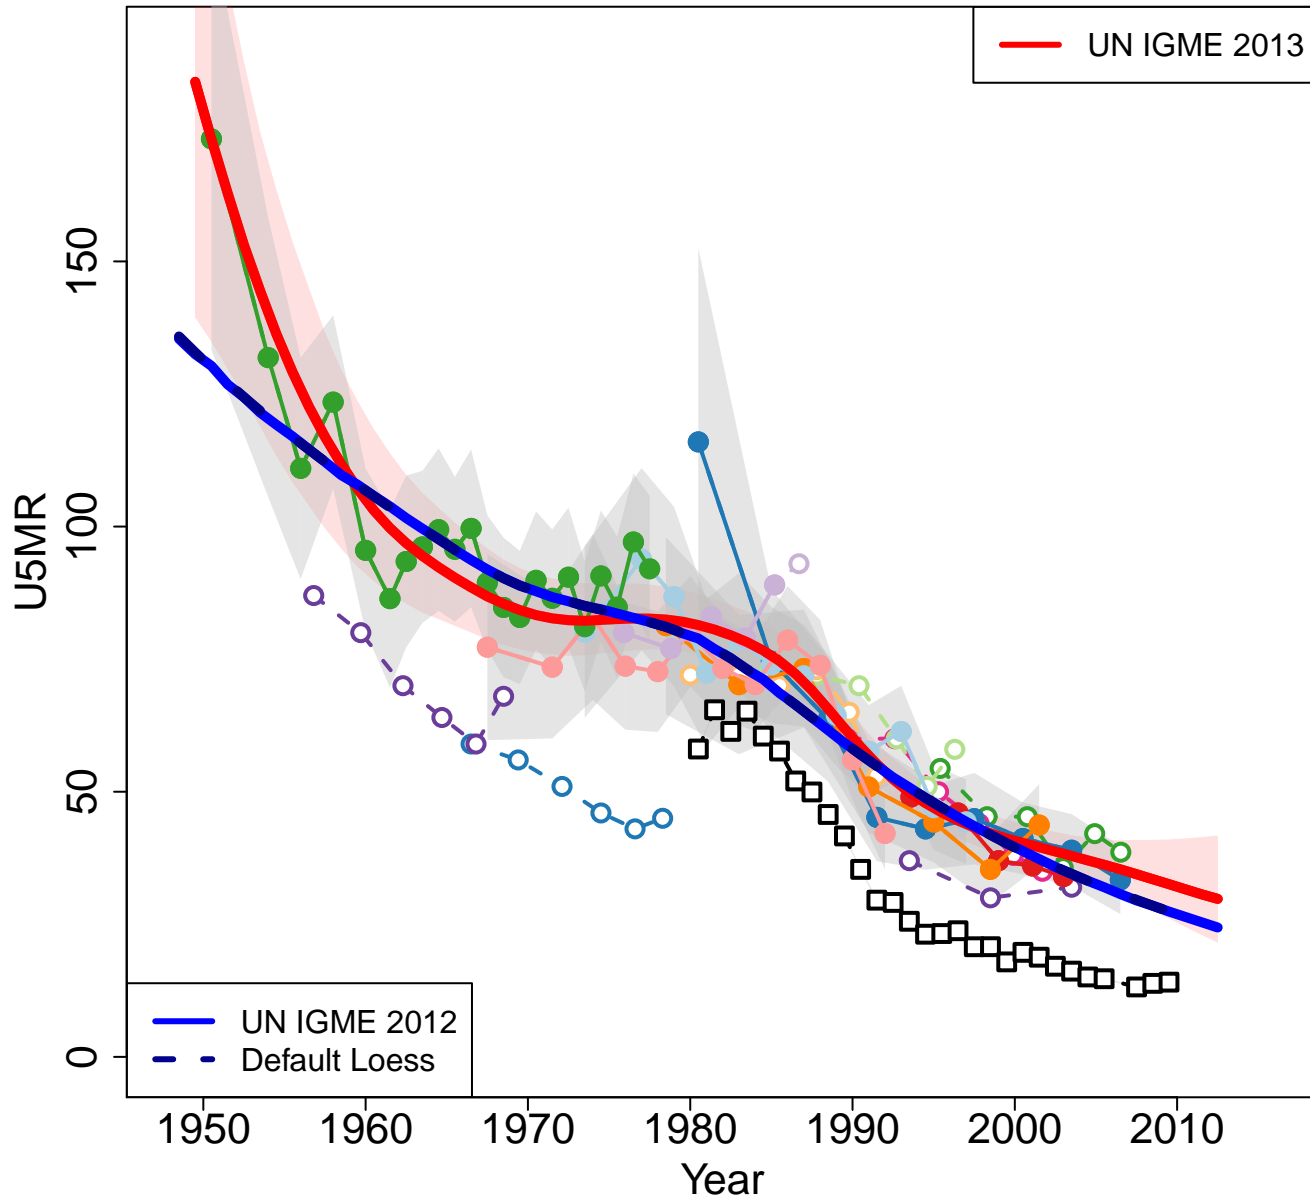

# Zoomed in

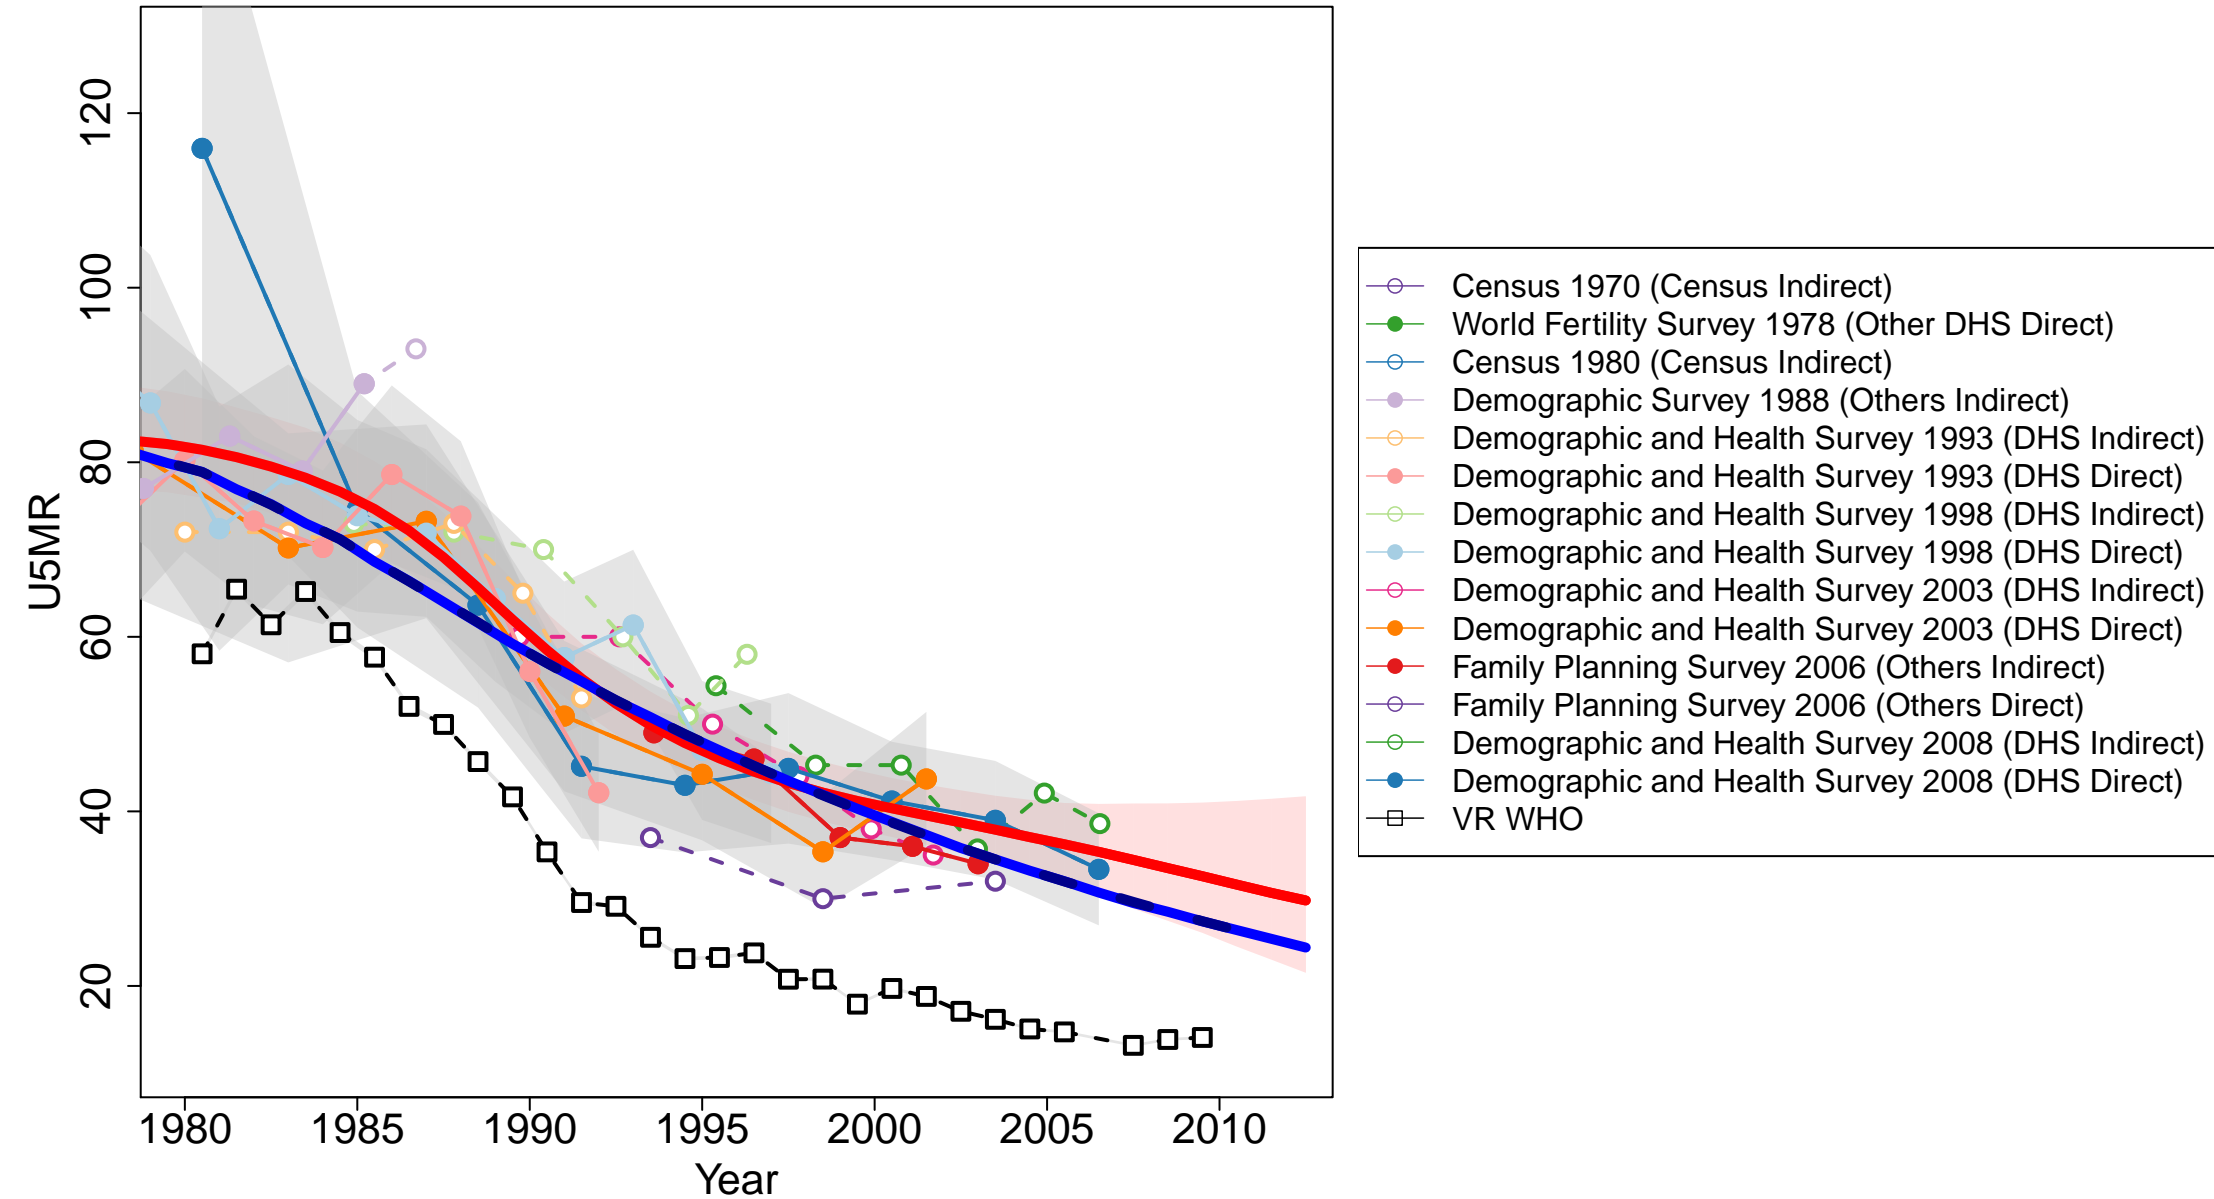

# Qatar

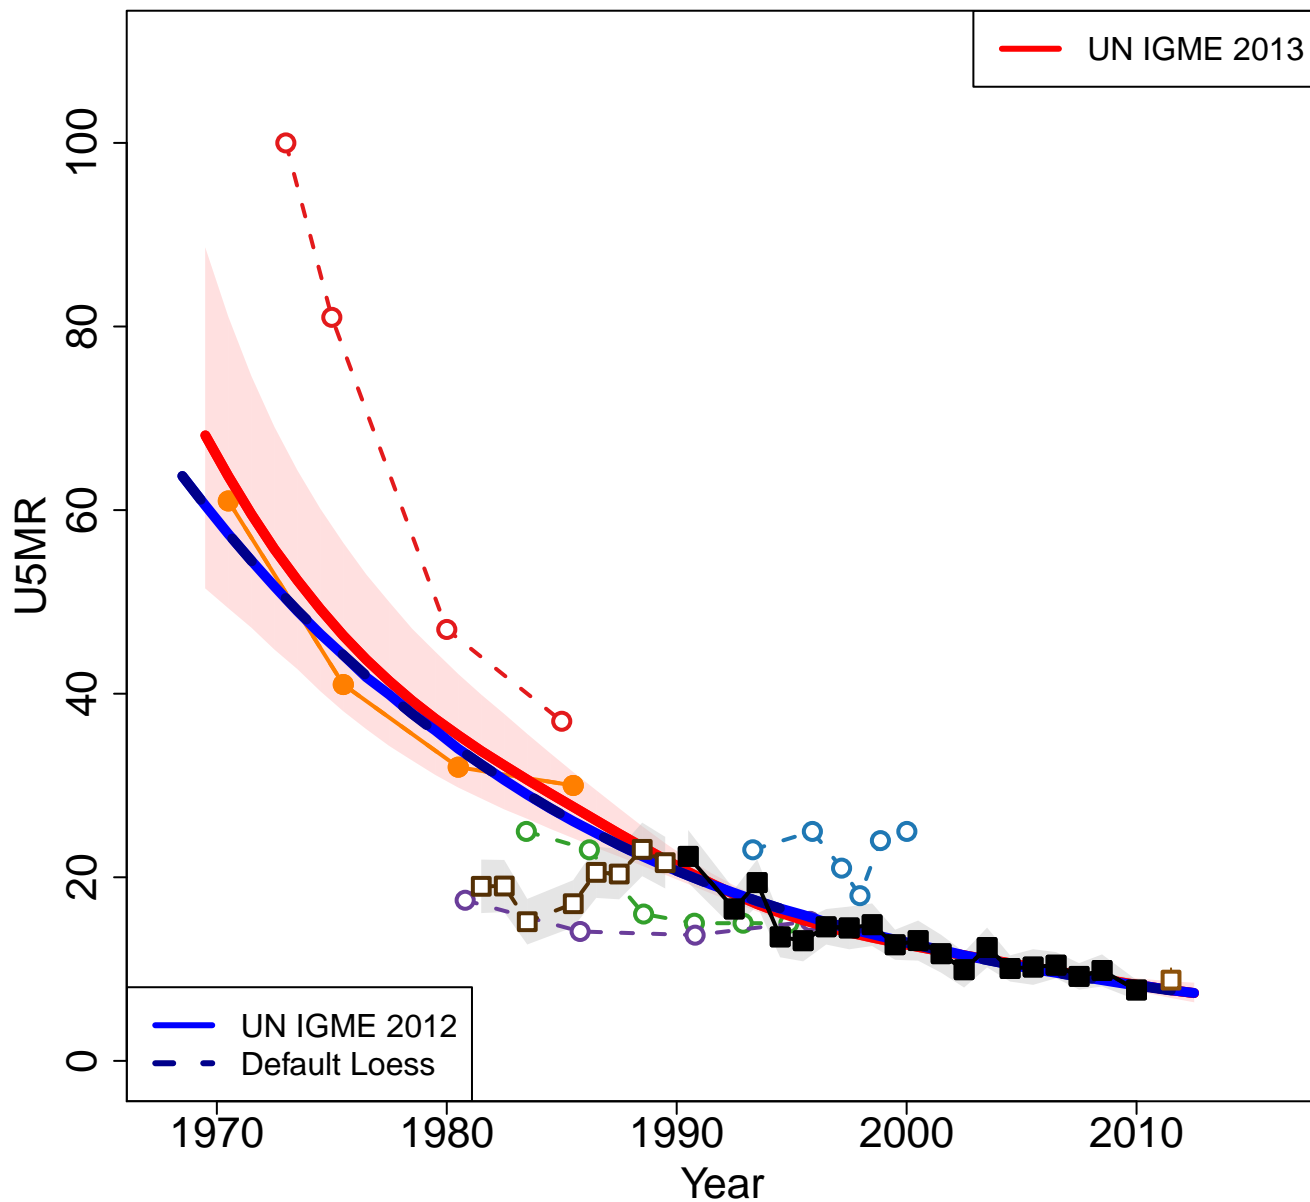

# Zoomed in

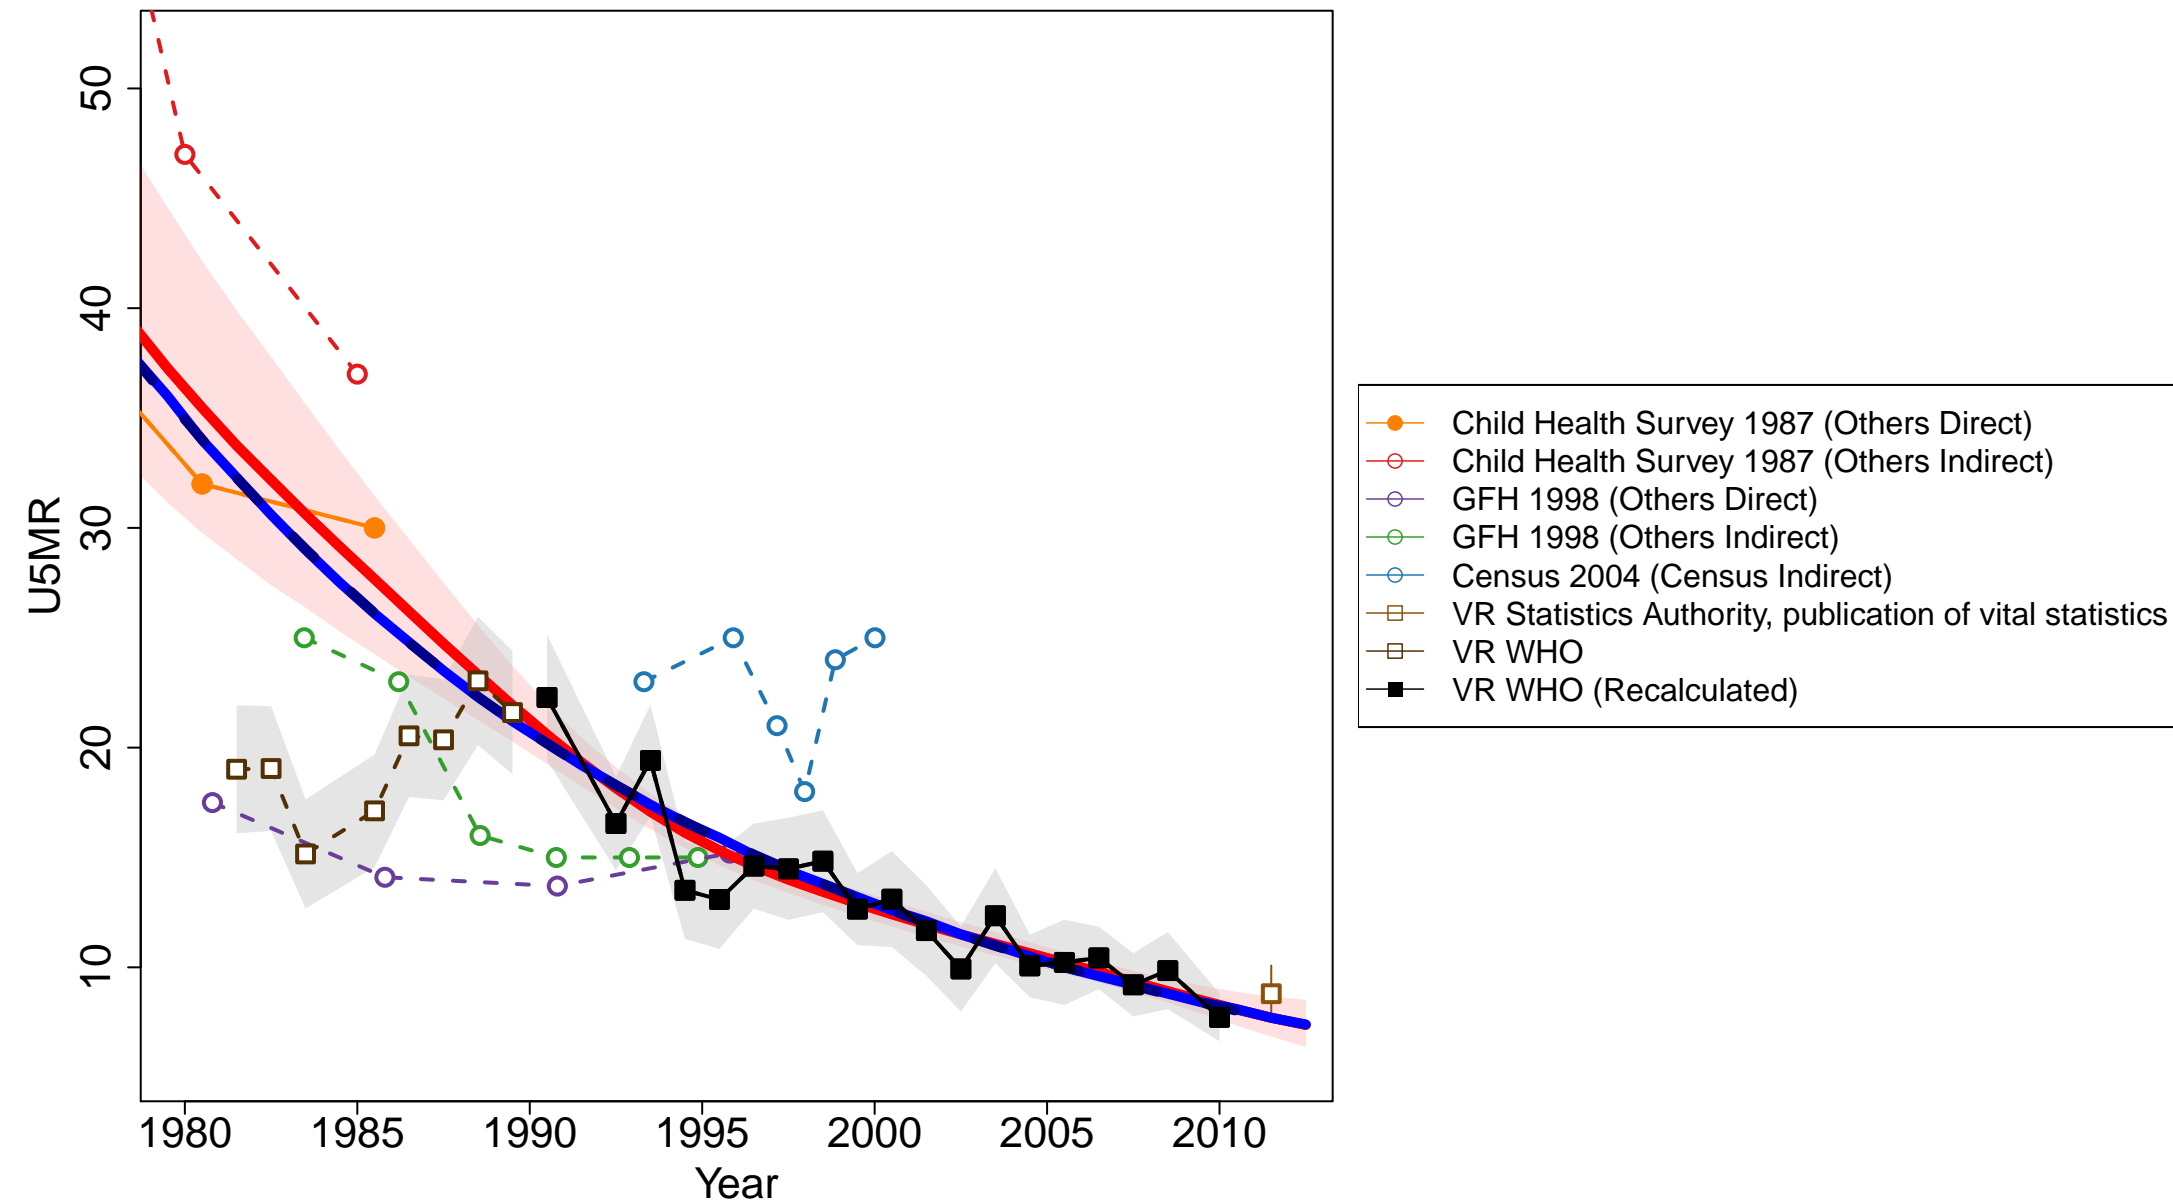

# Korea Rep

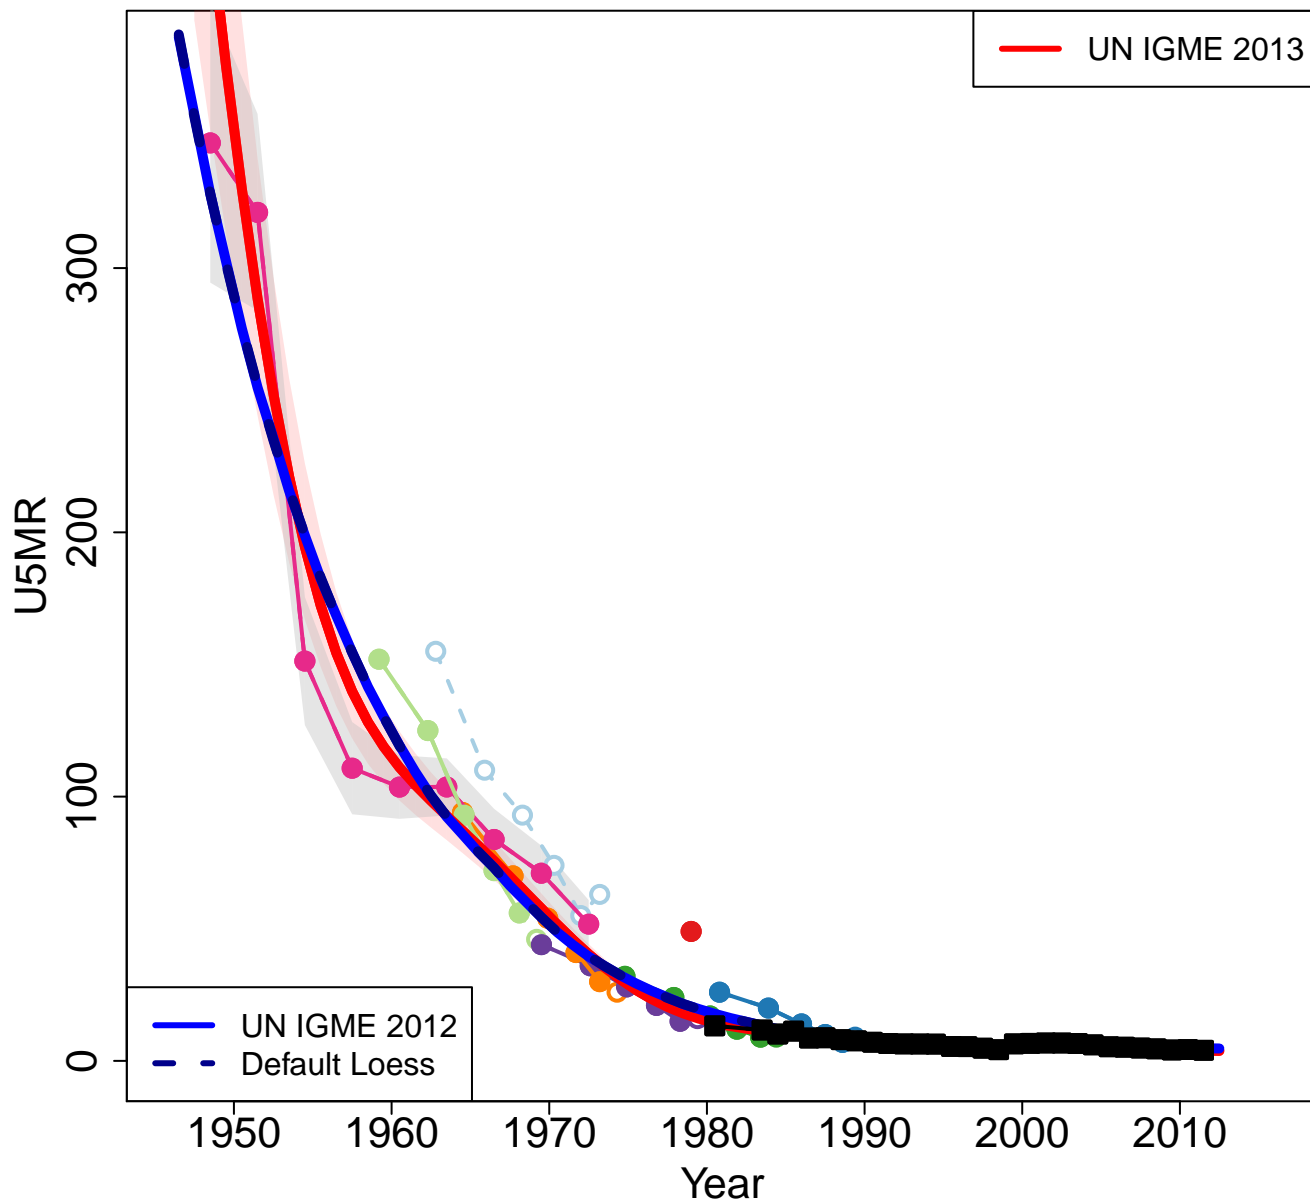

# Zoomed in

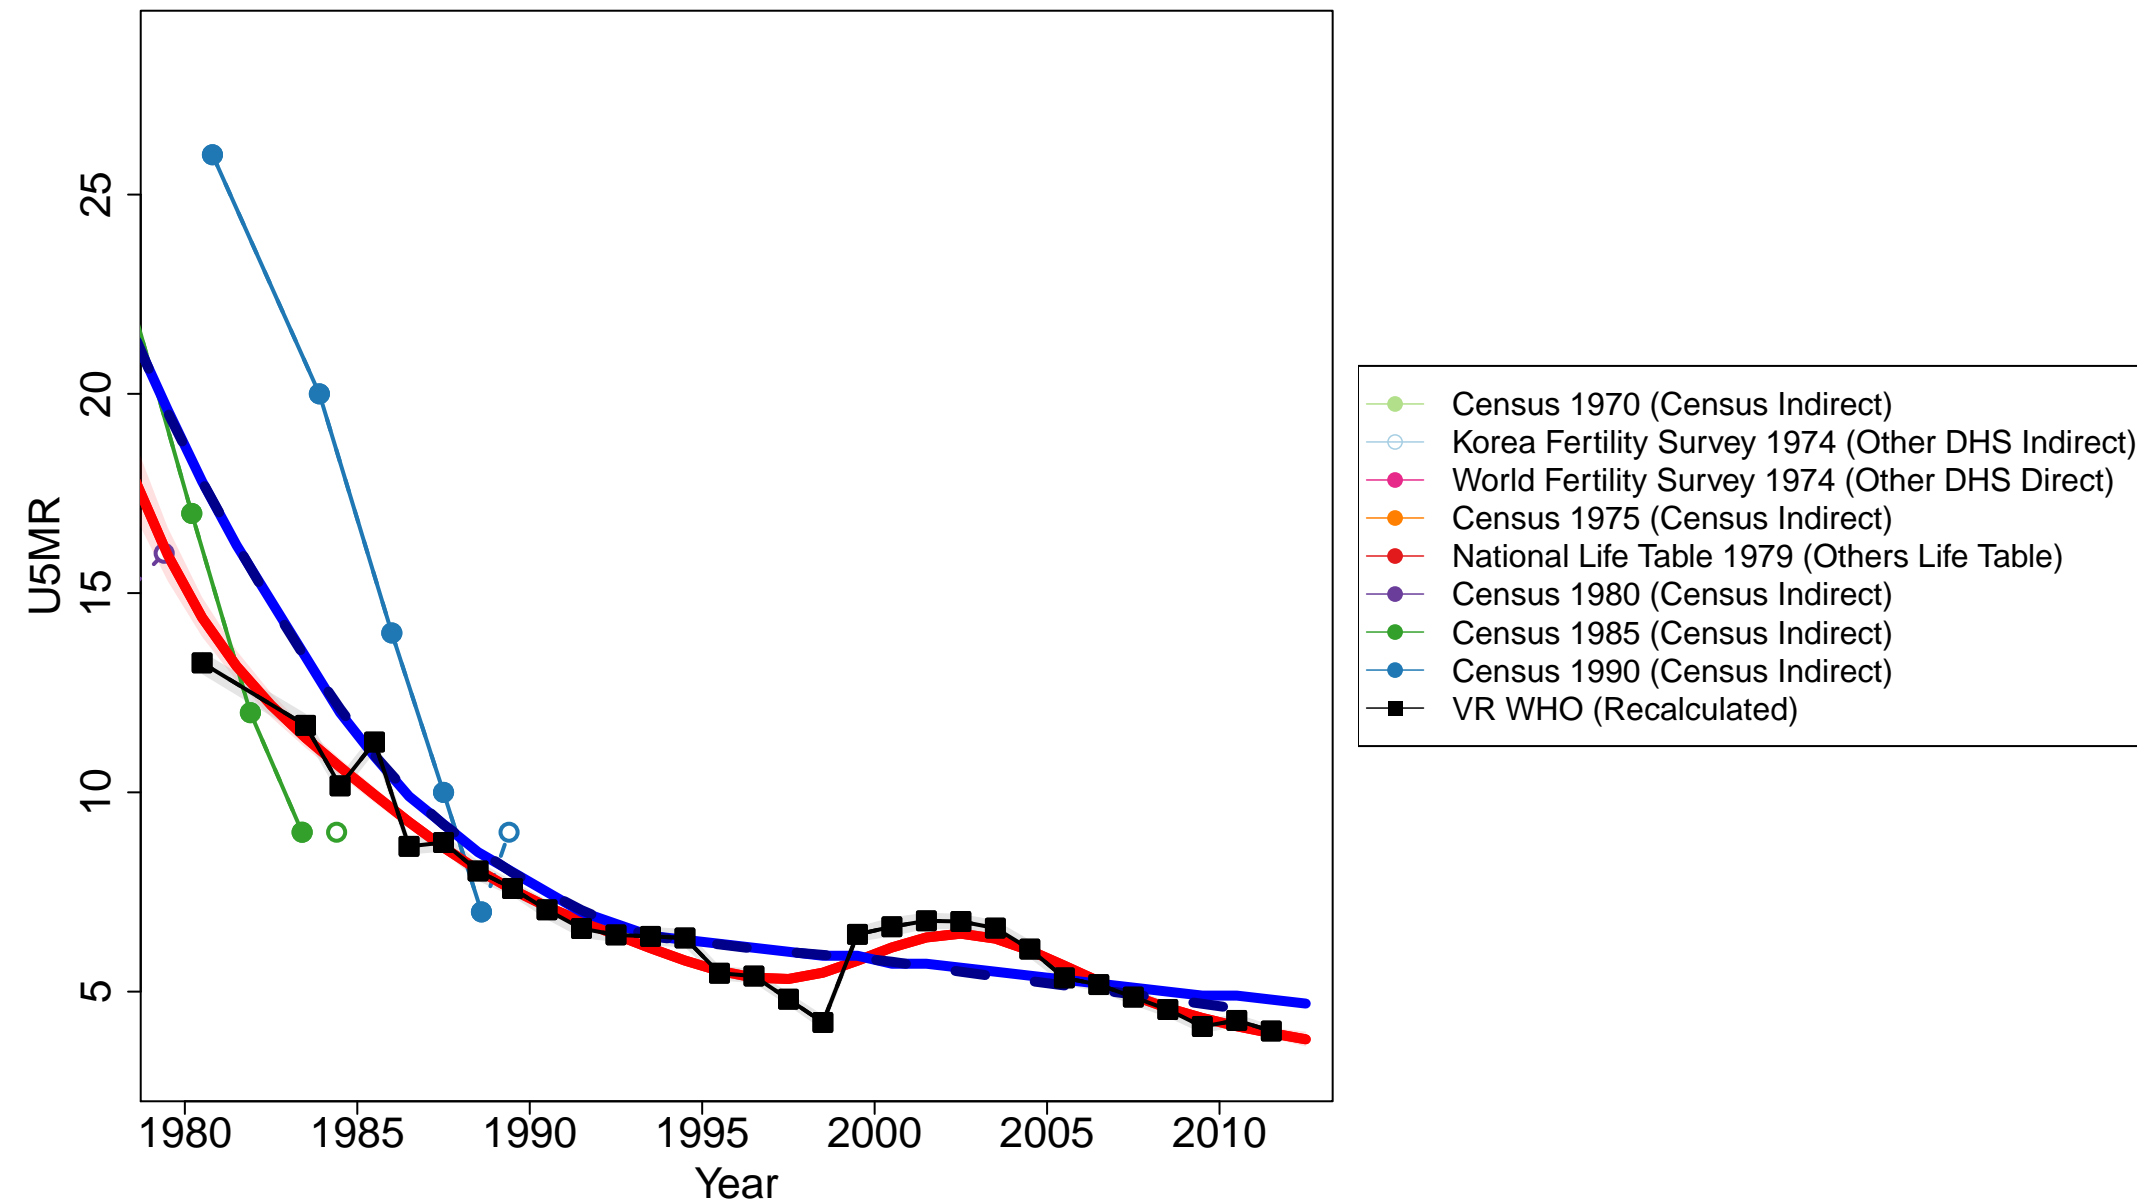

# Moldova

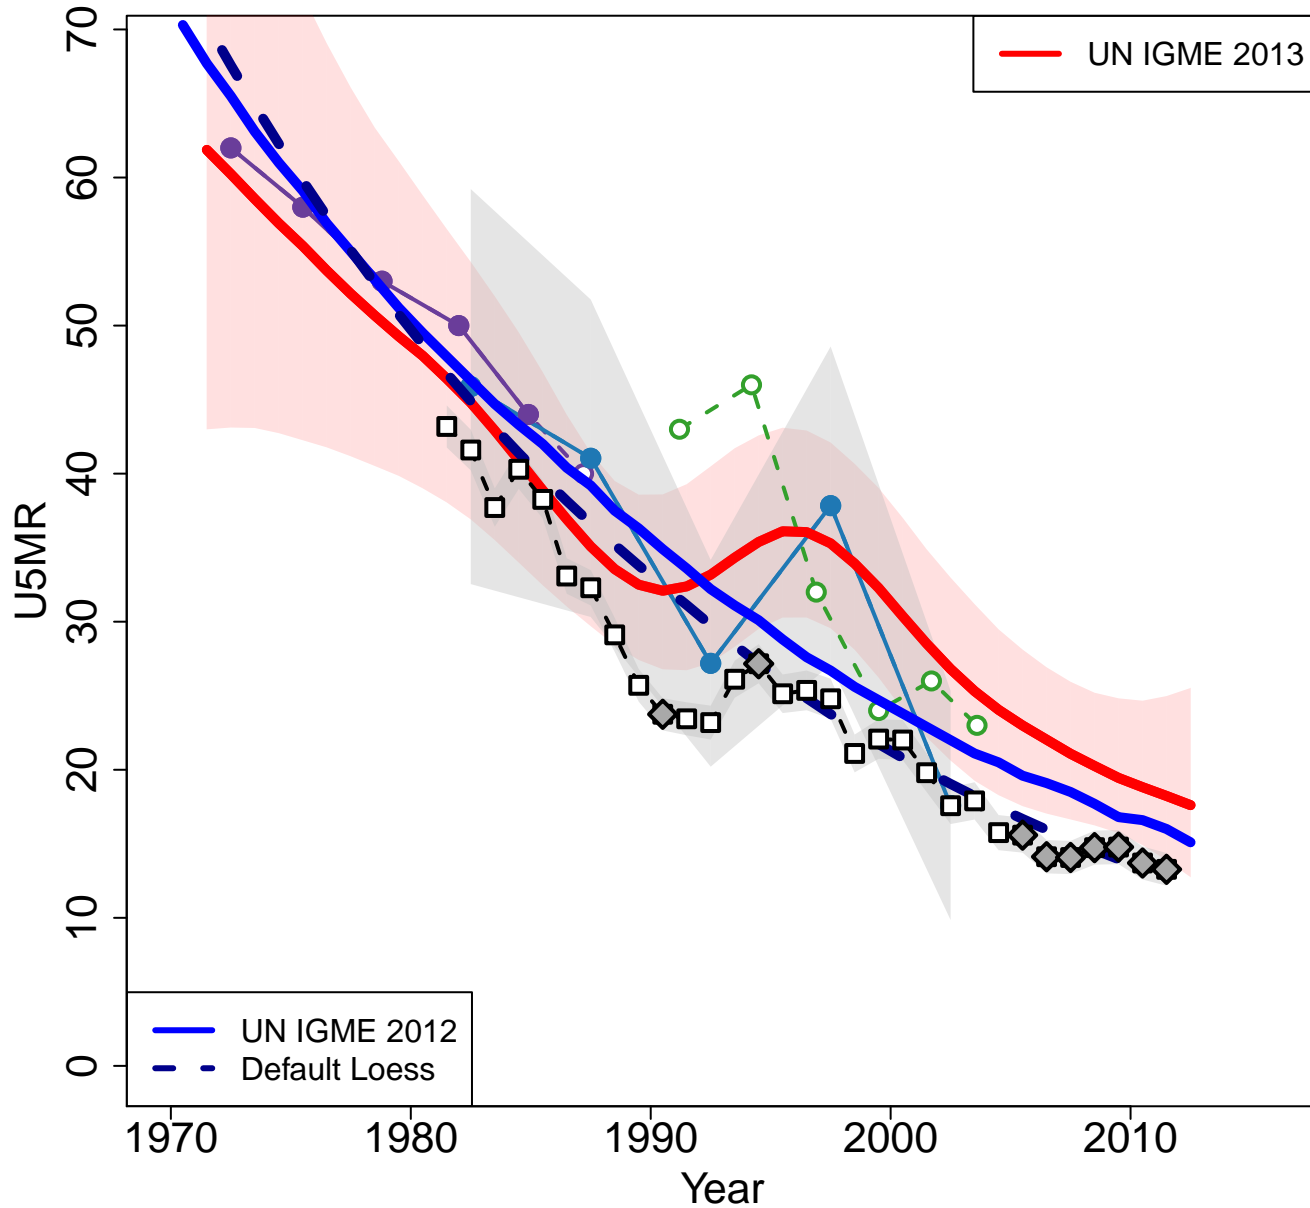

# Zoomed in

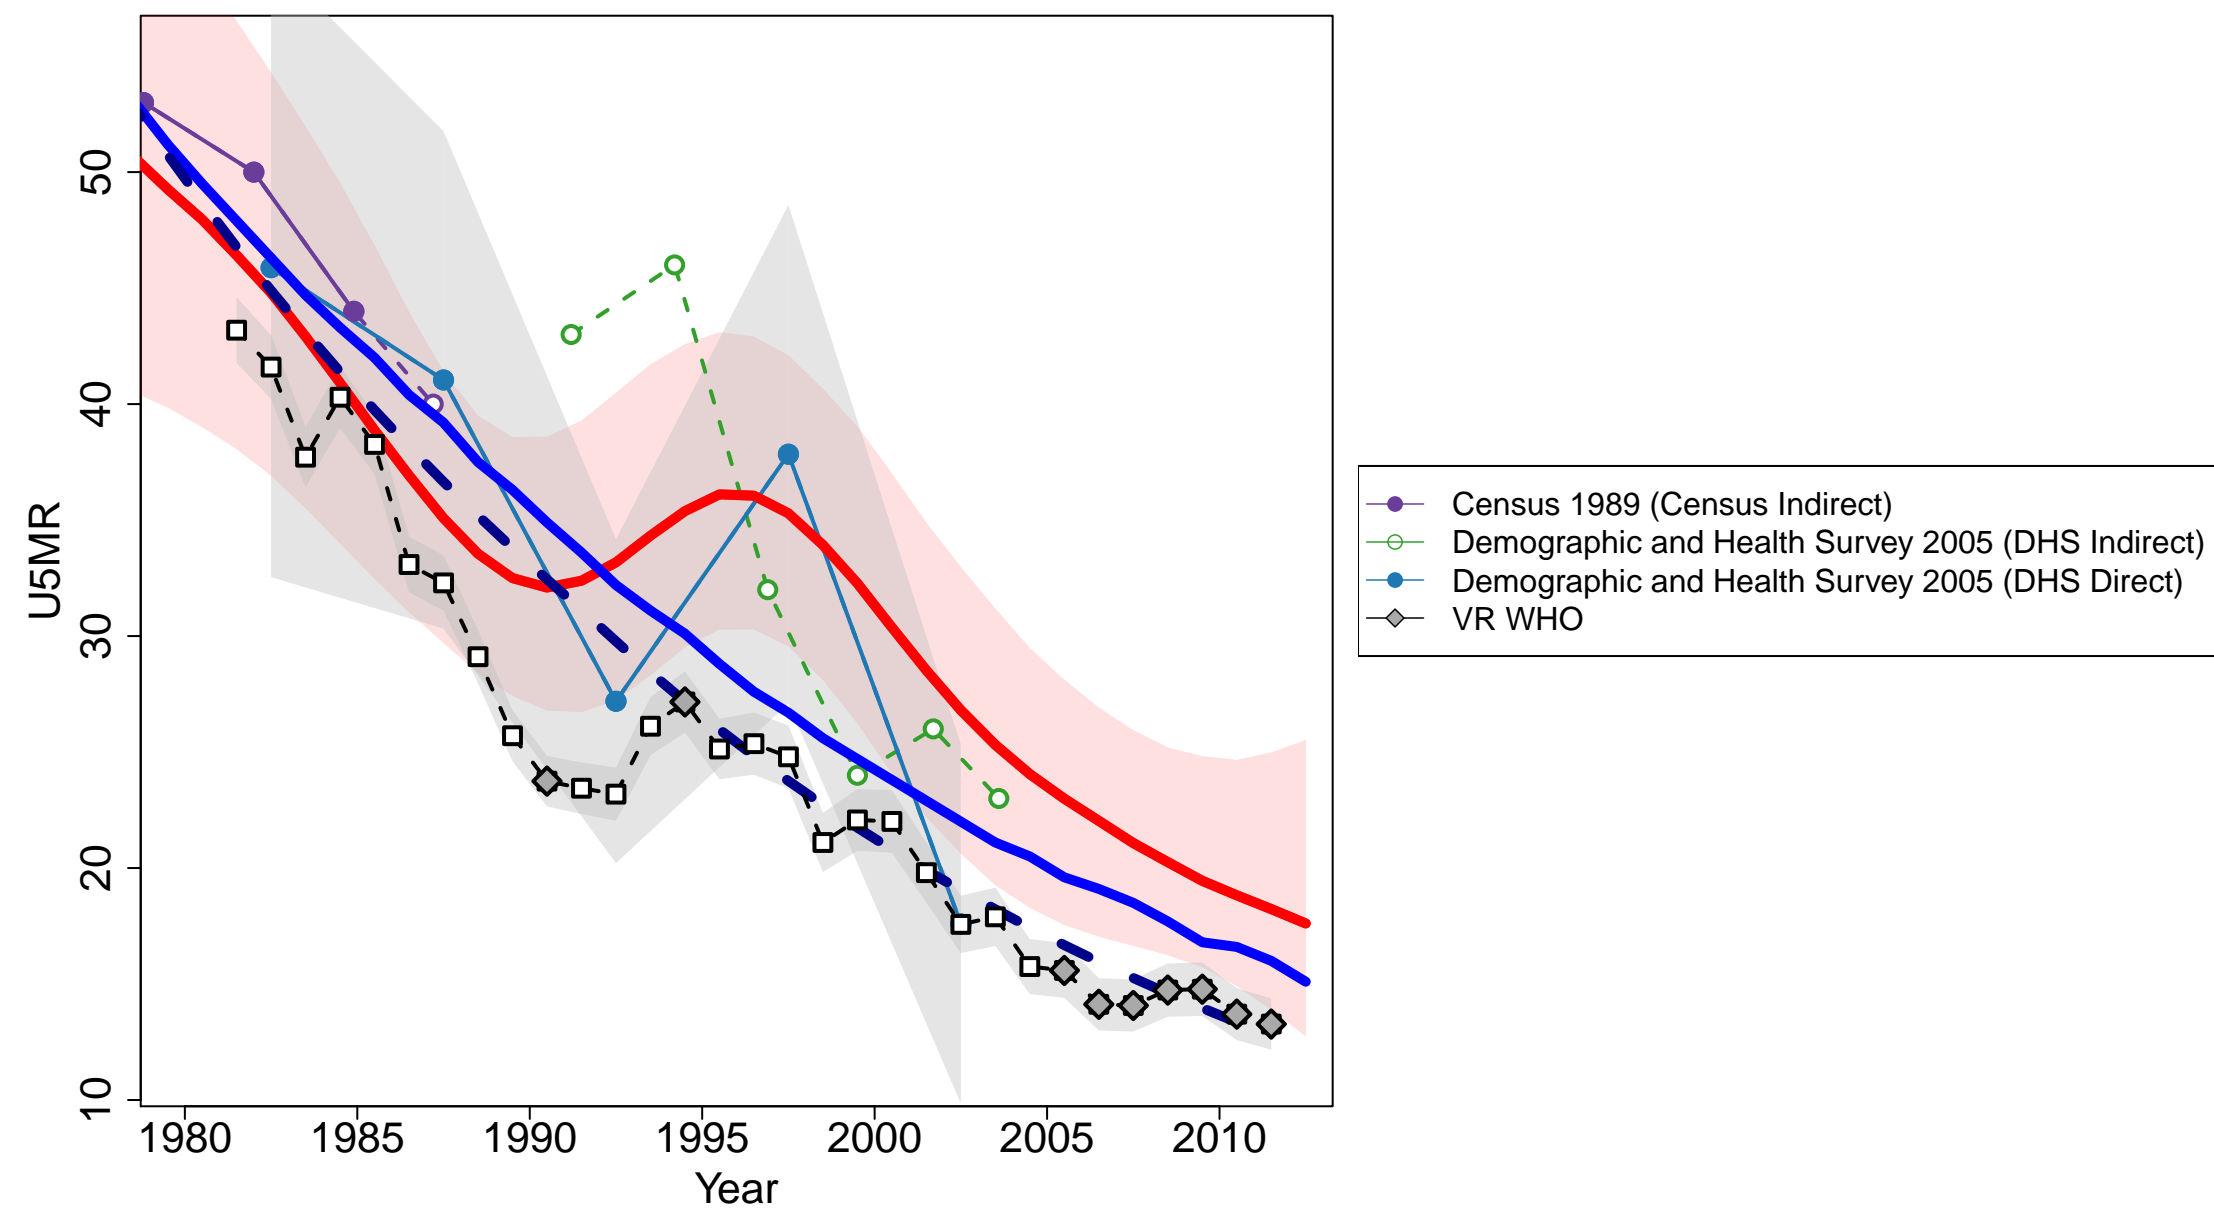

# Russian Federation

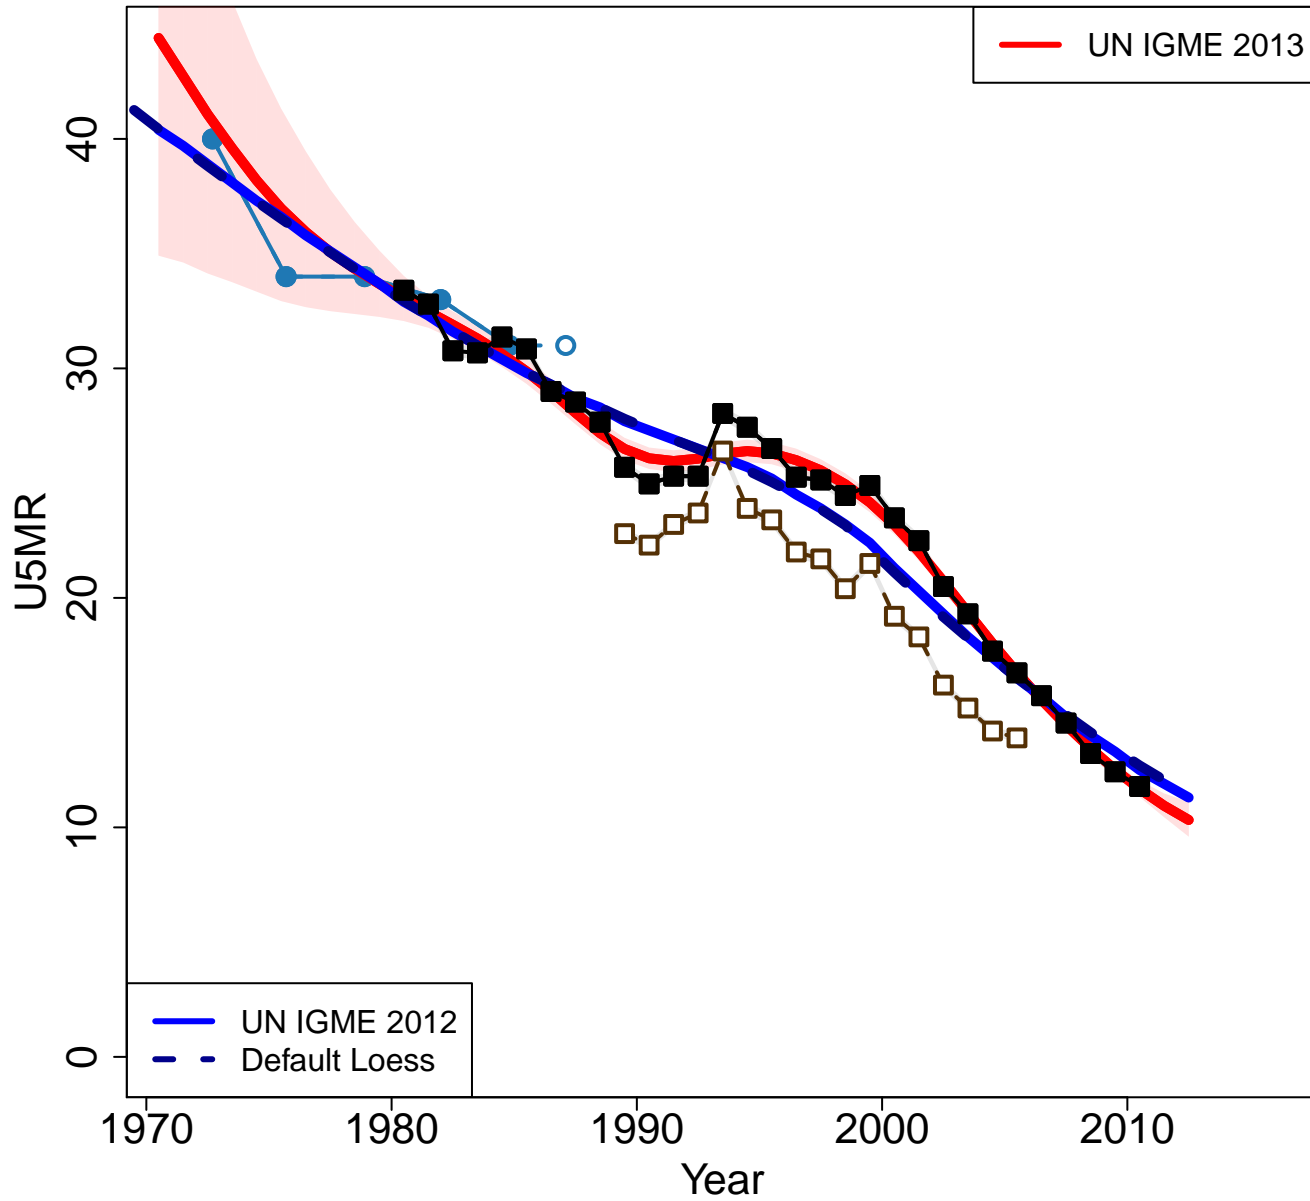

# Zoomed in

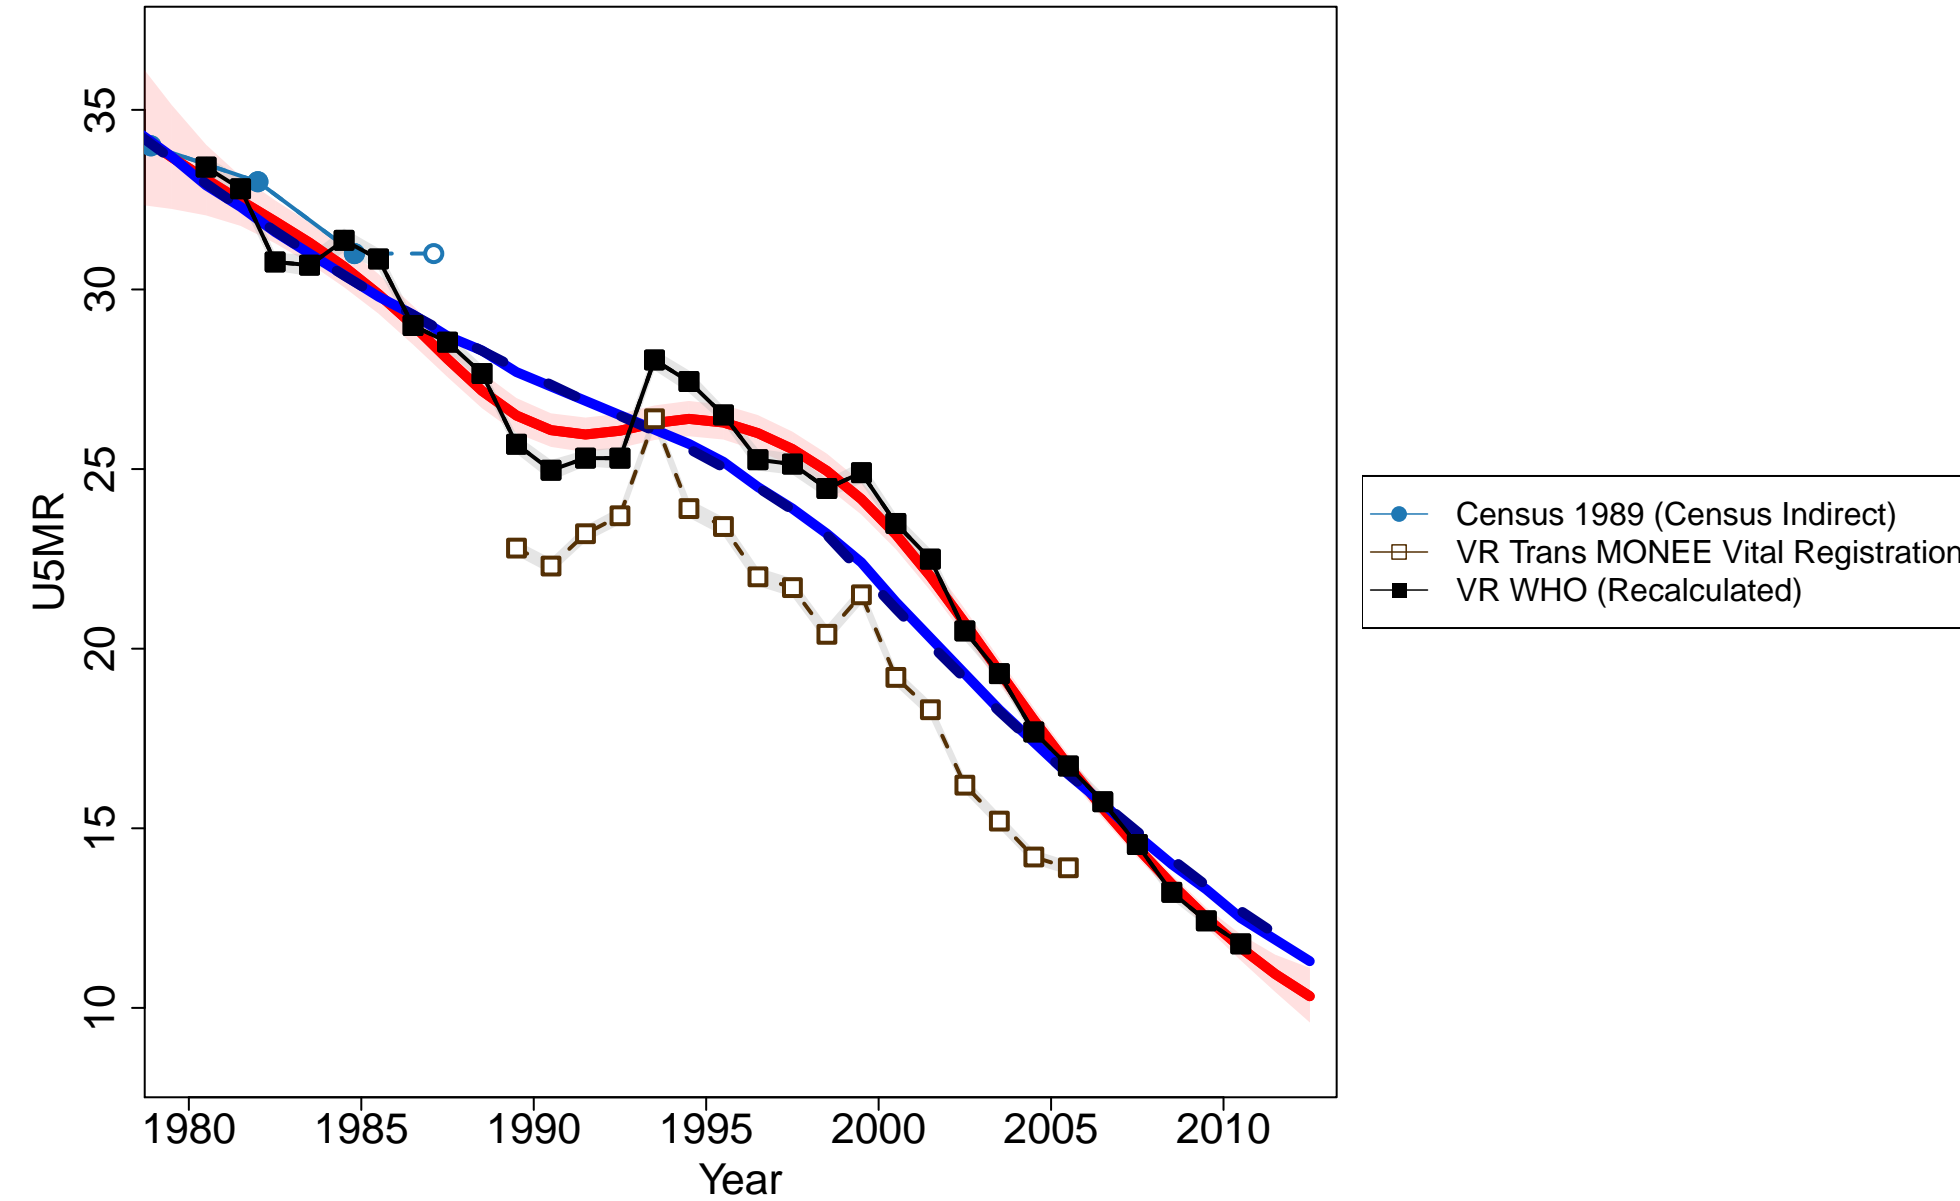

# Saint Kitts & Nevis

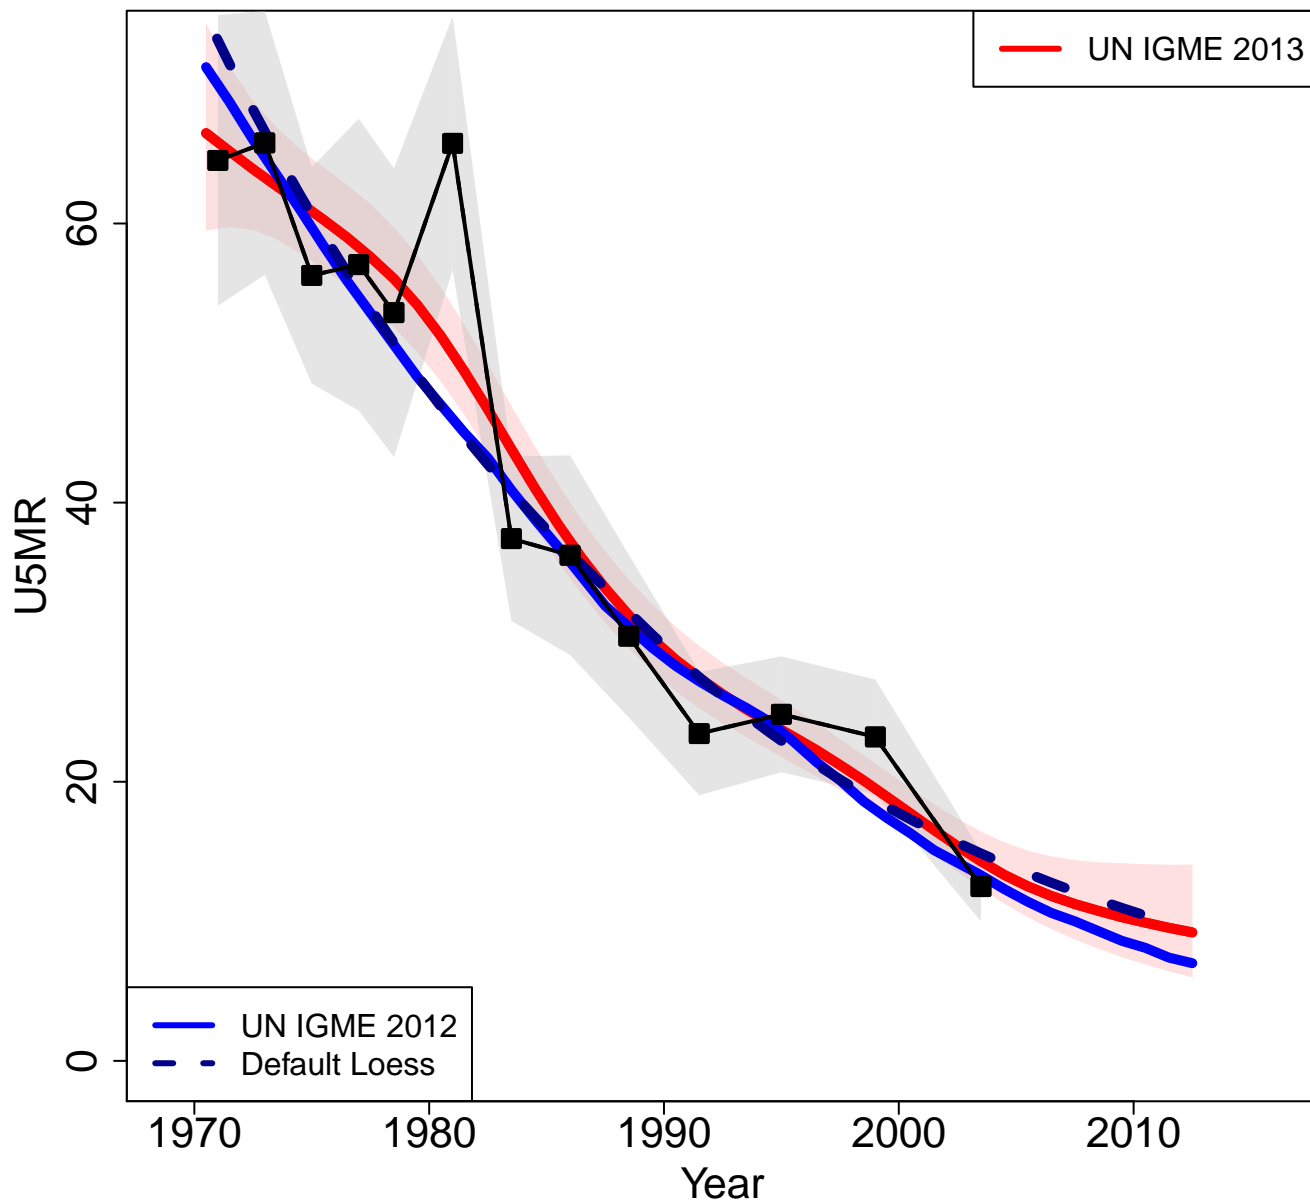

# Zoomed in

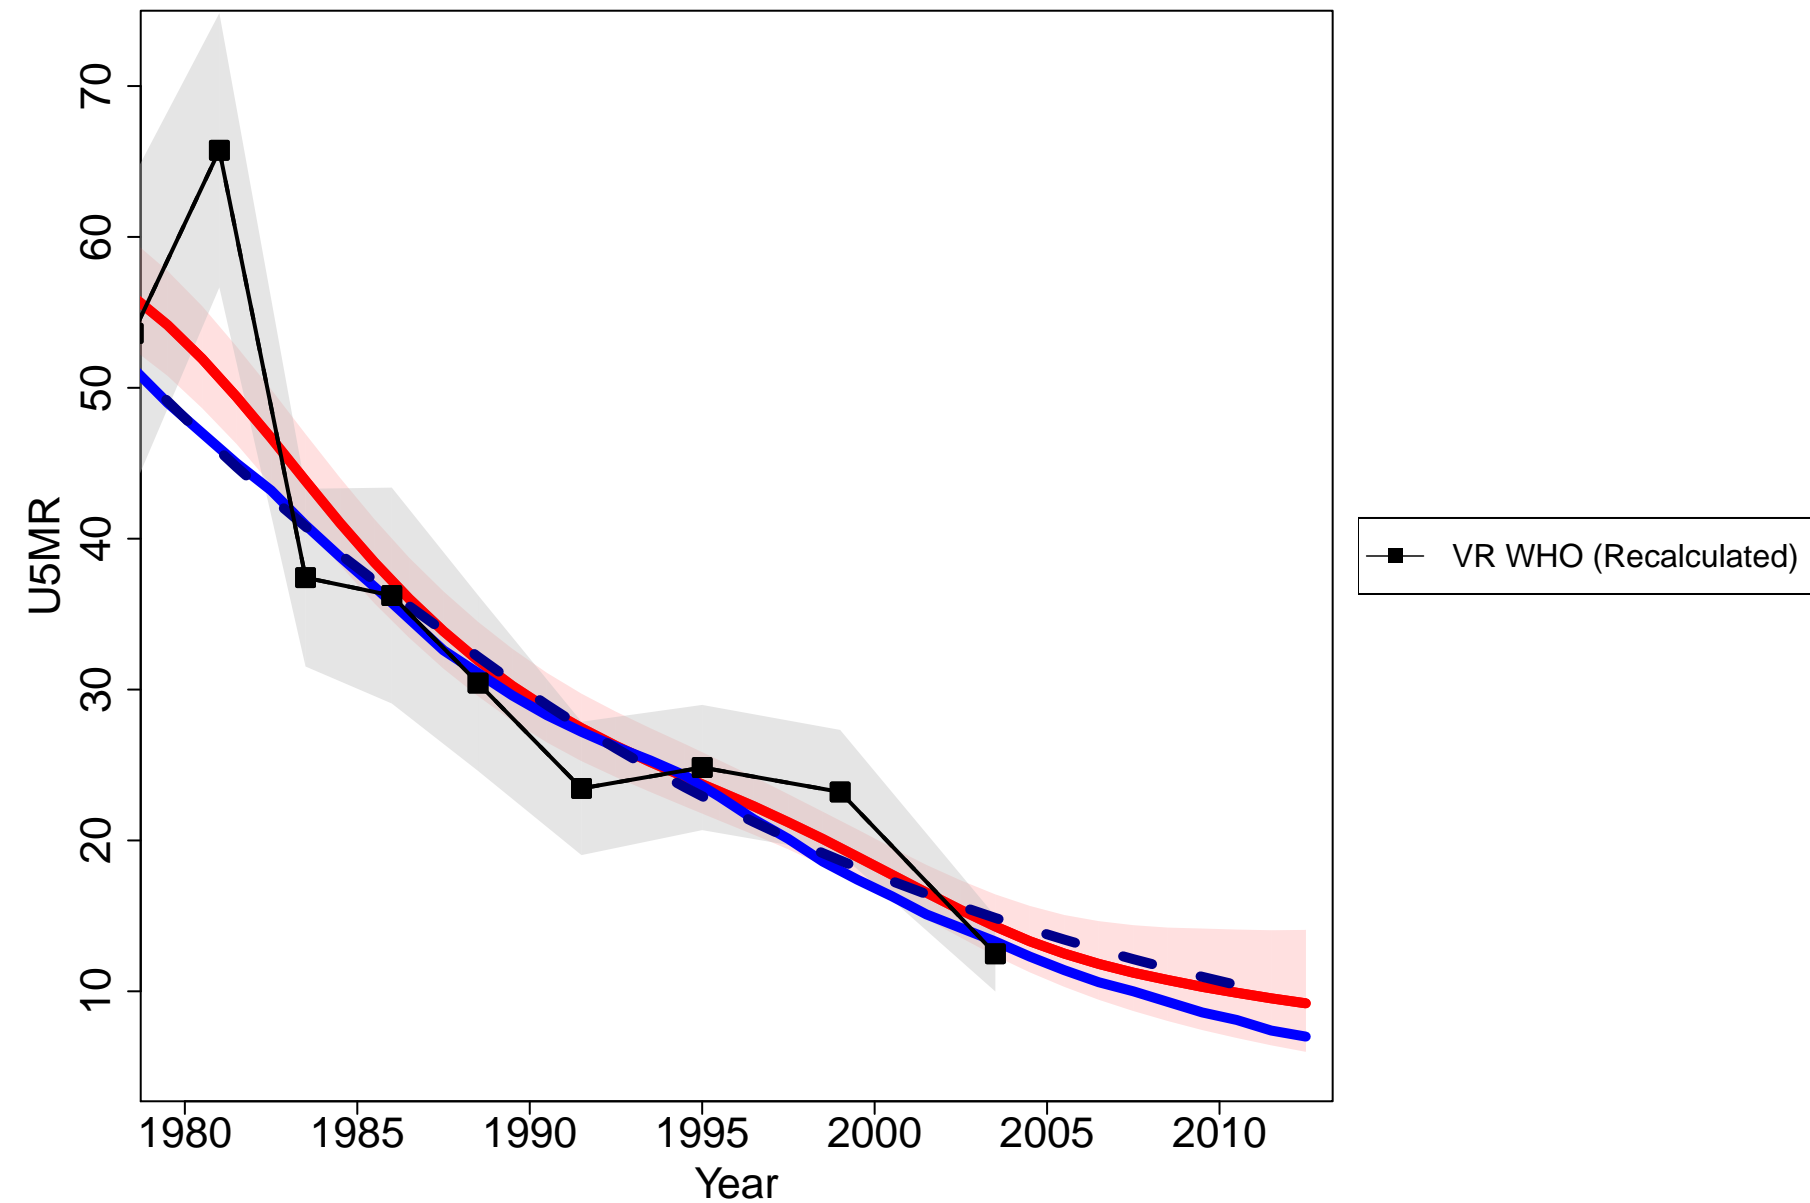



# Samoa

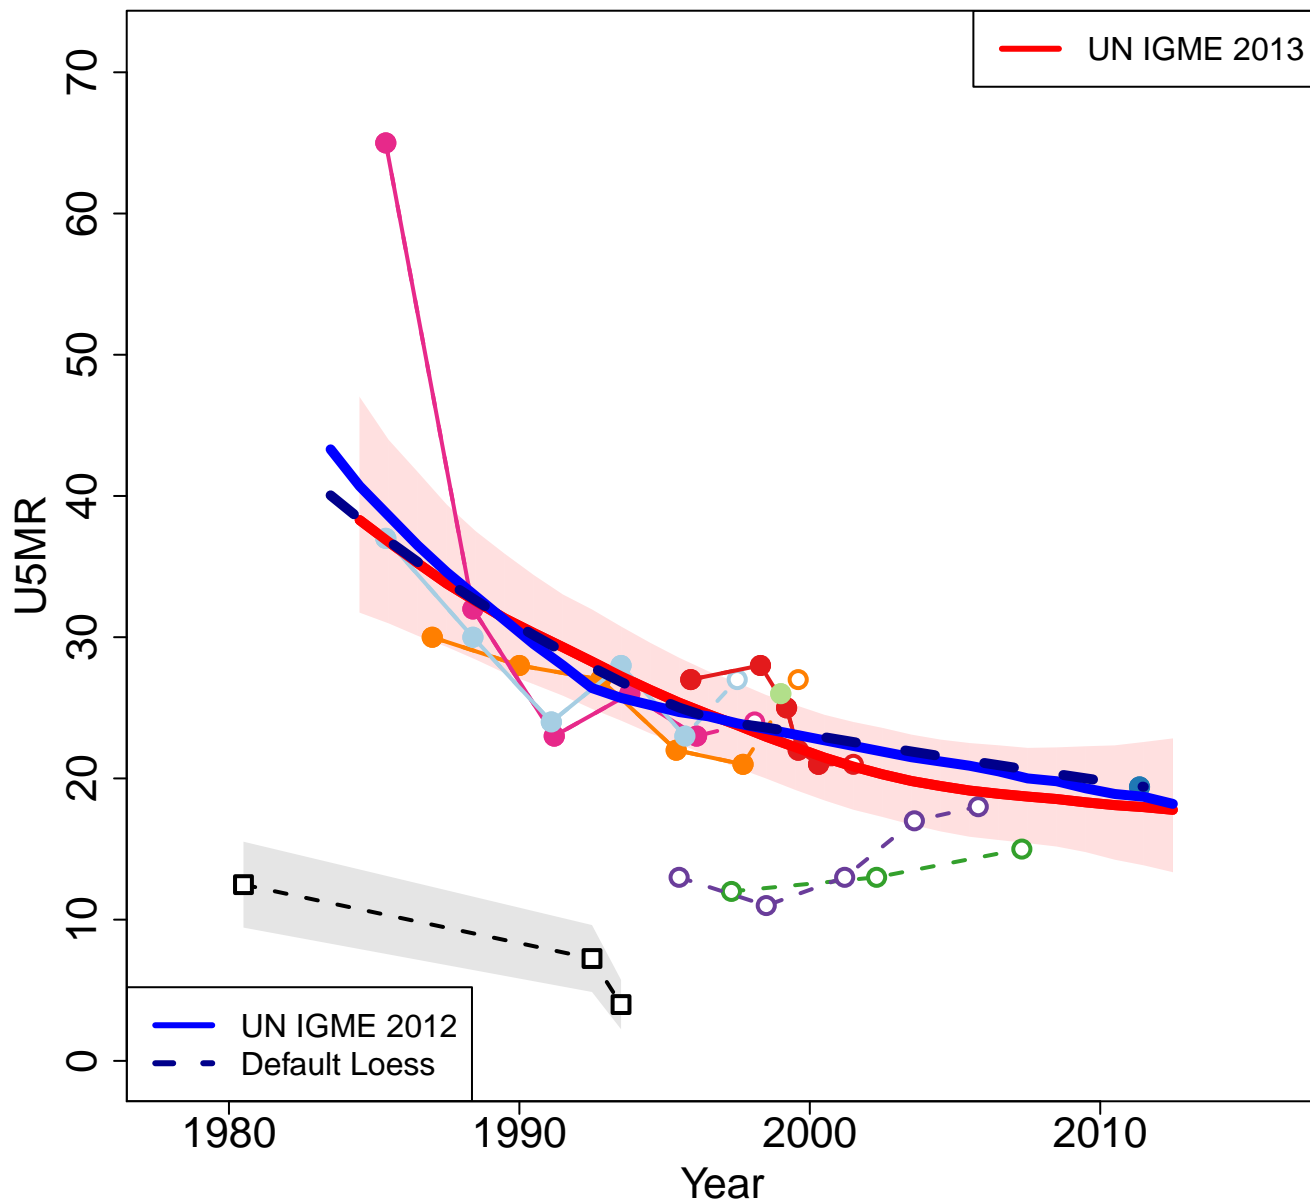

# Zoomed in

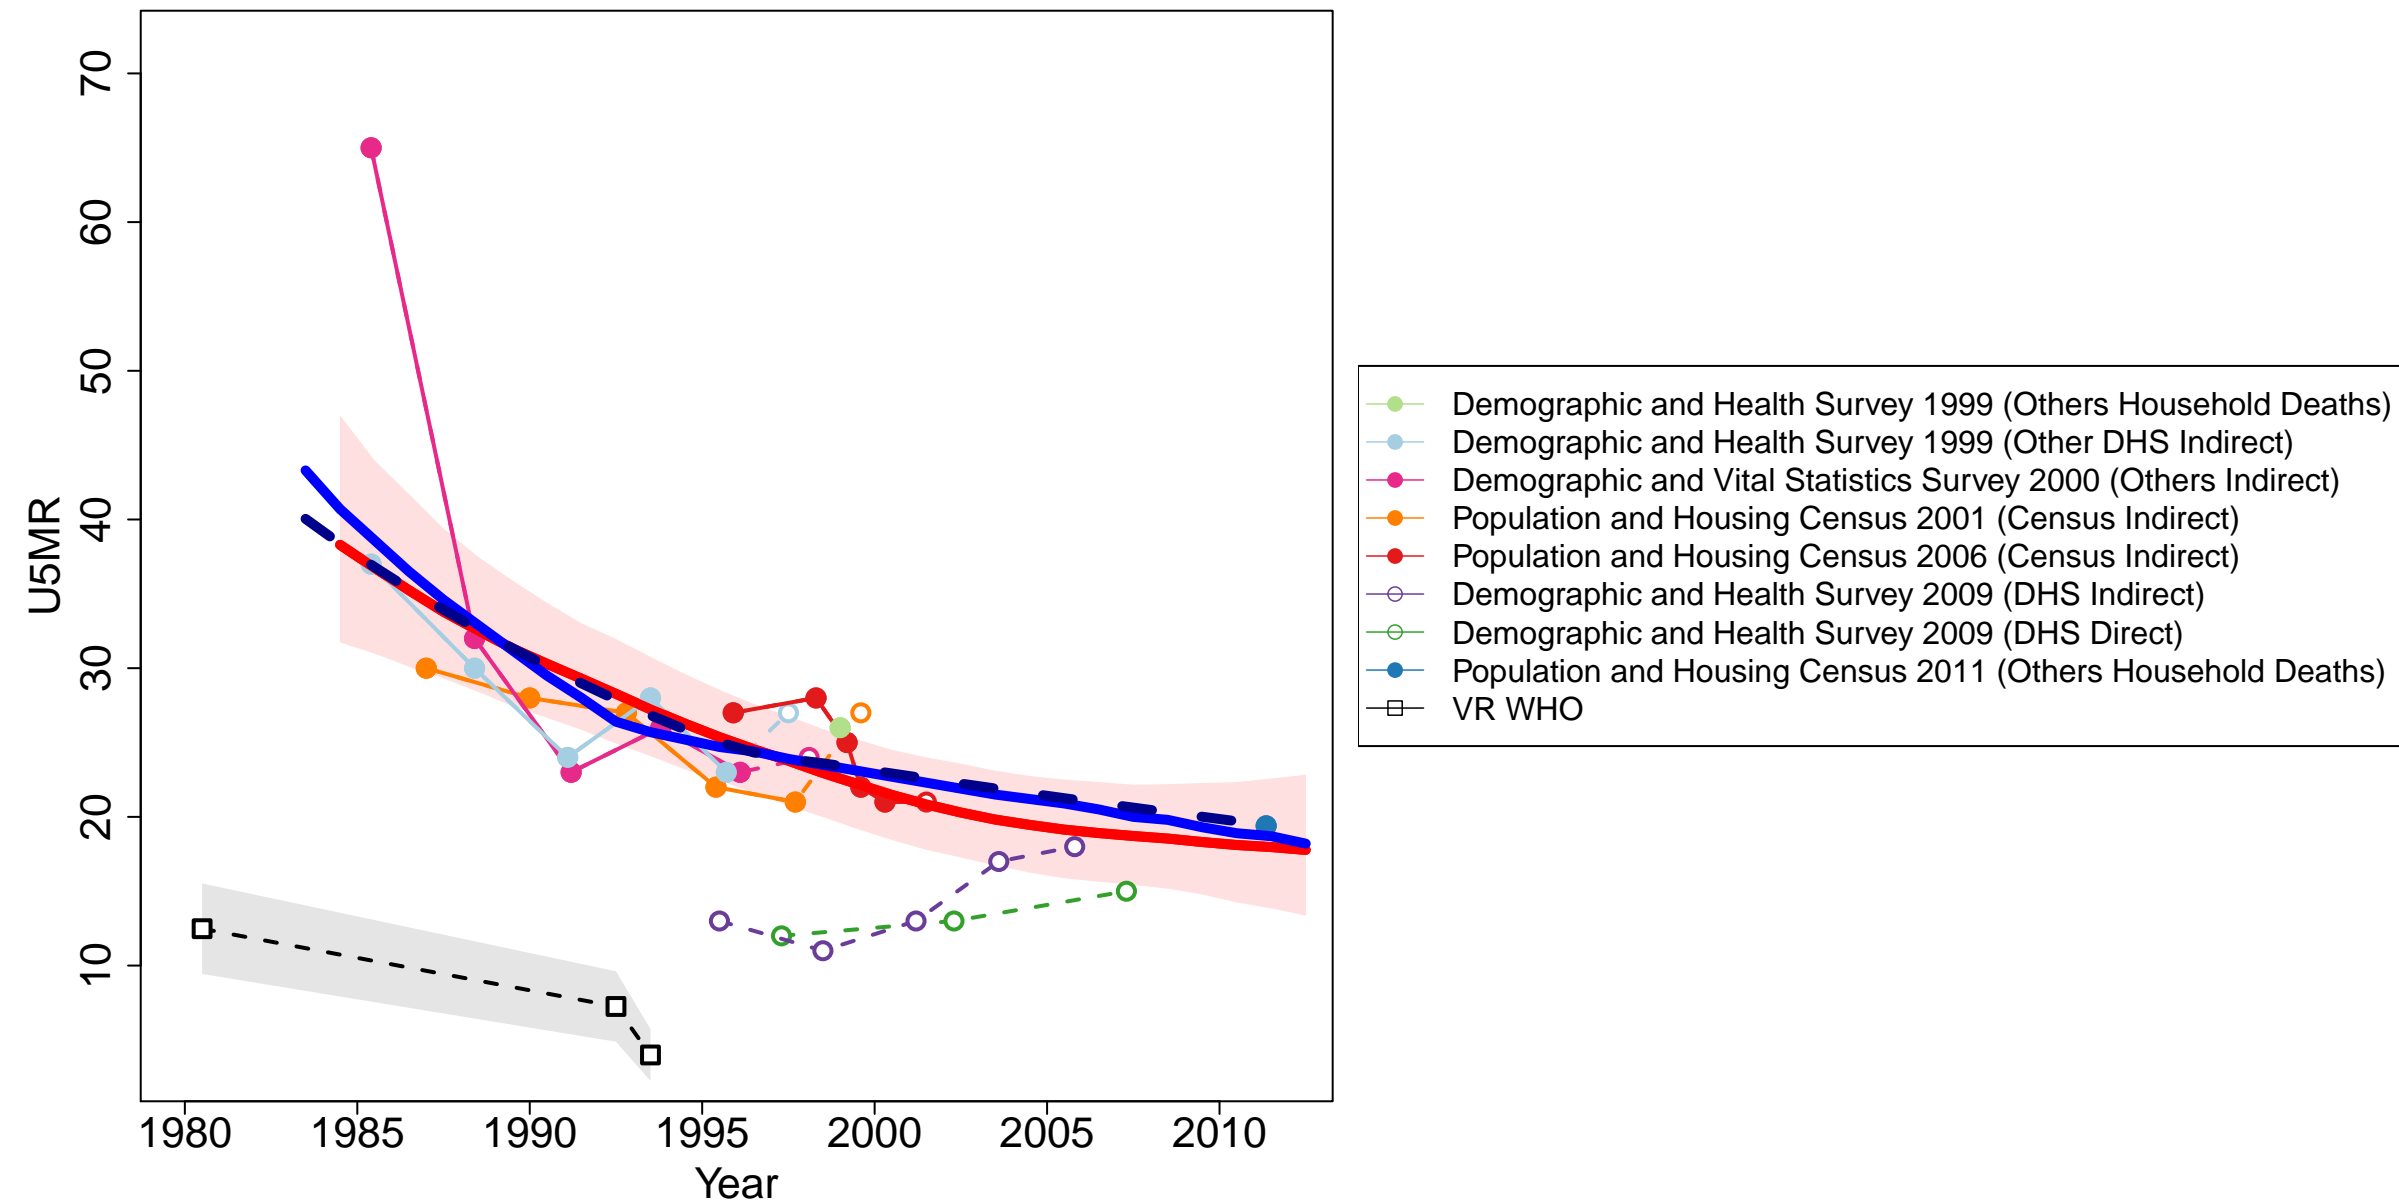

# Sao Tome & Principe

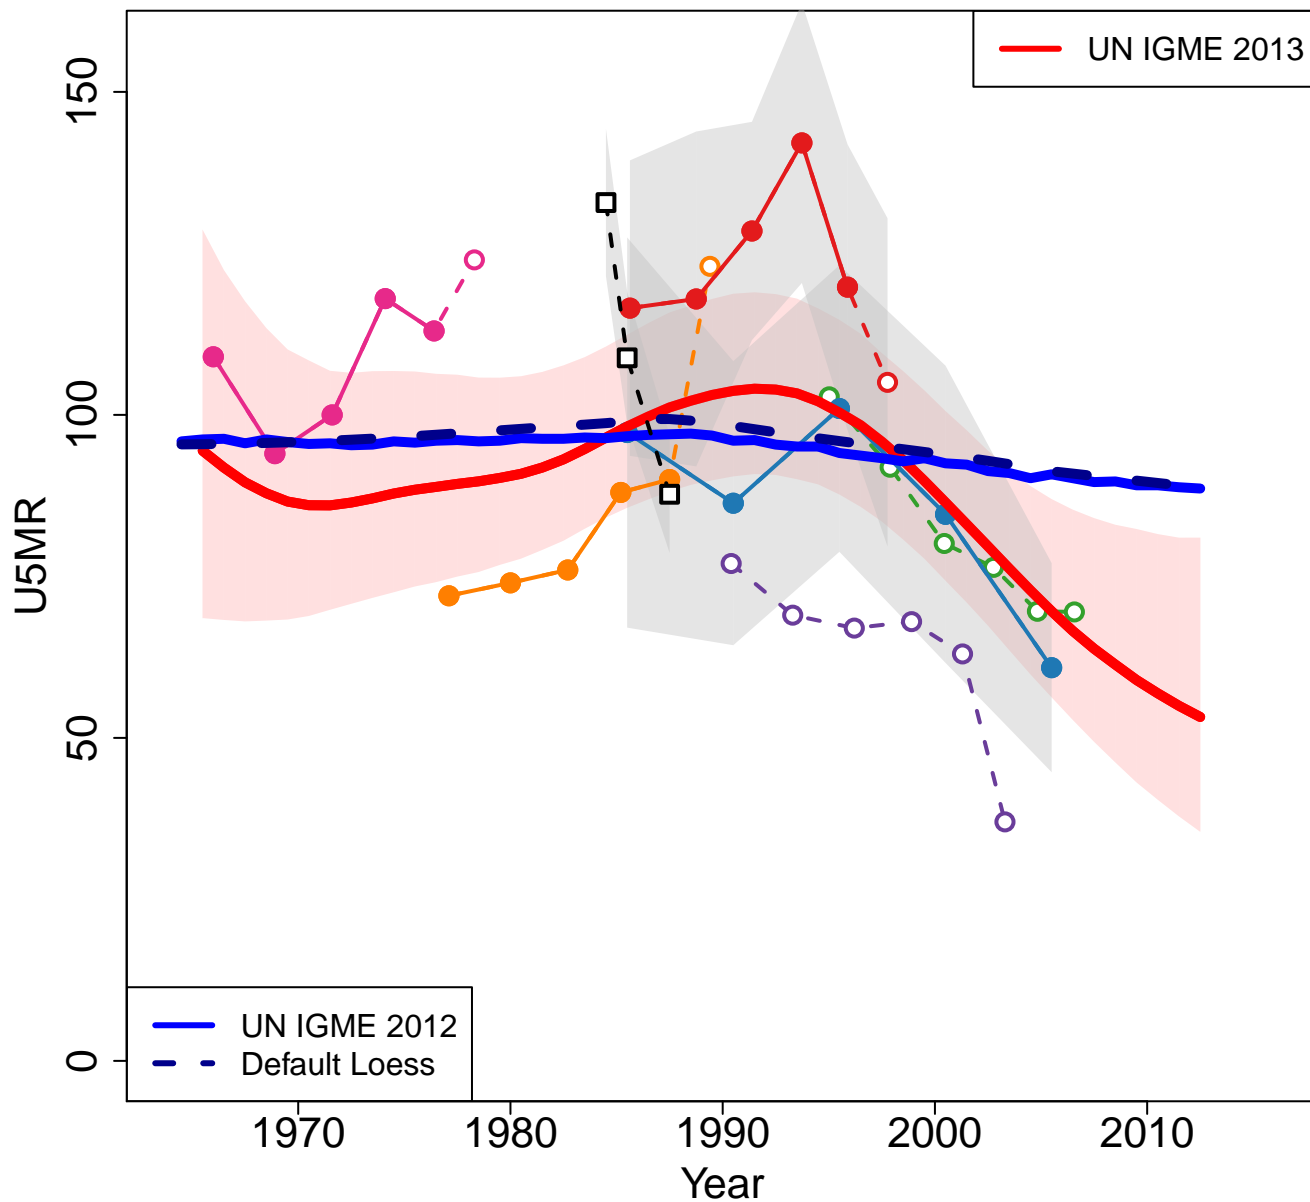

# Zoomed in

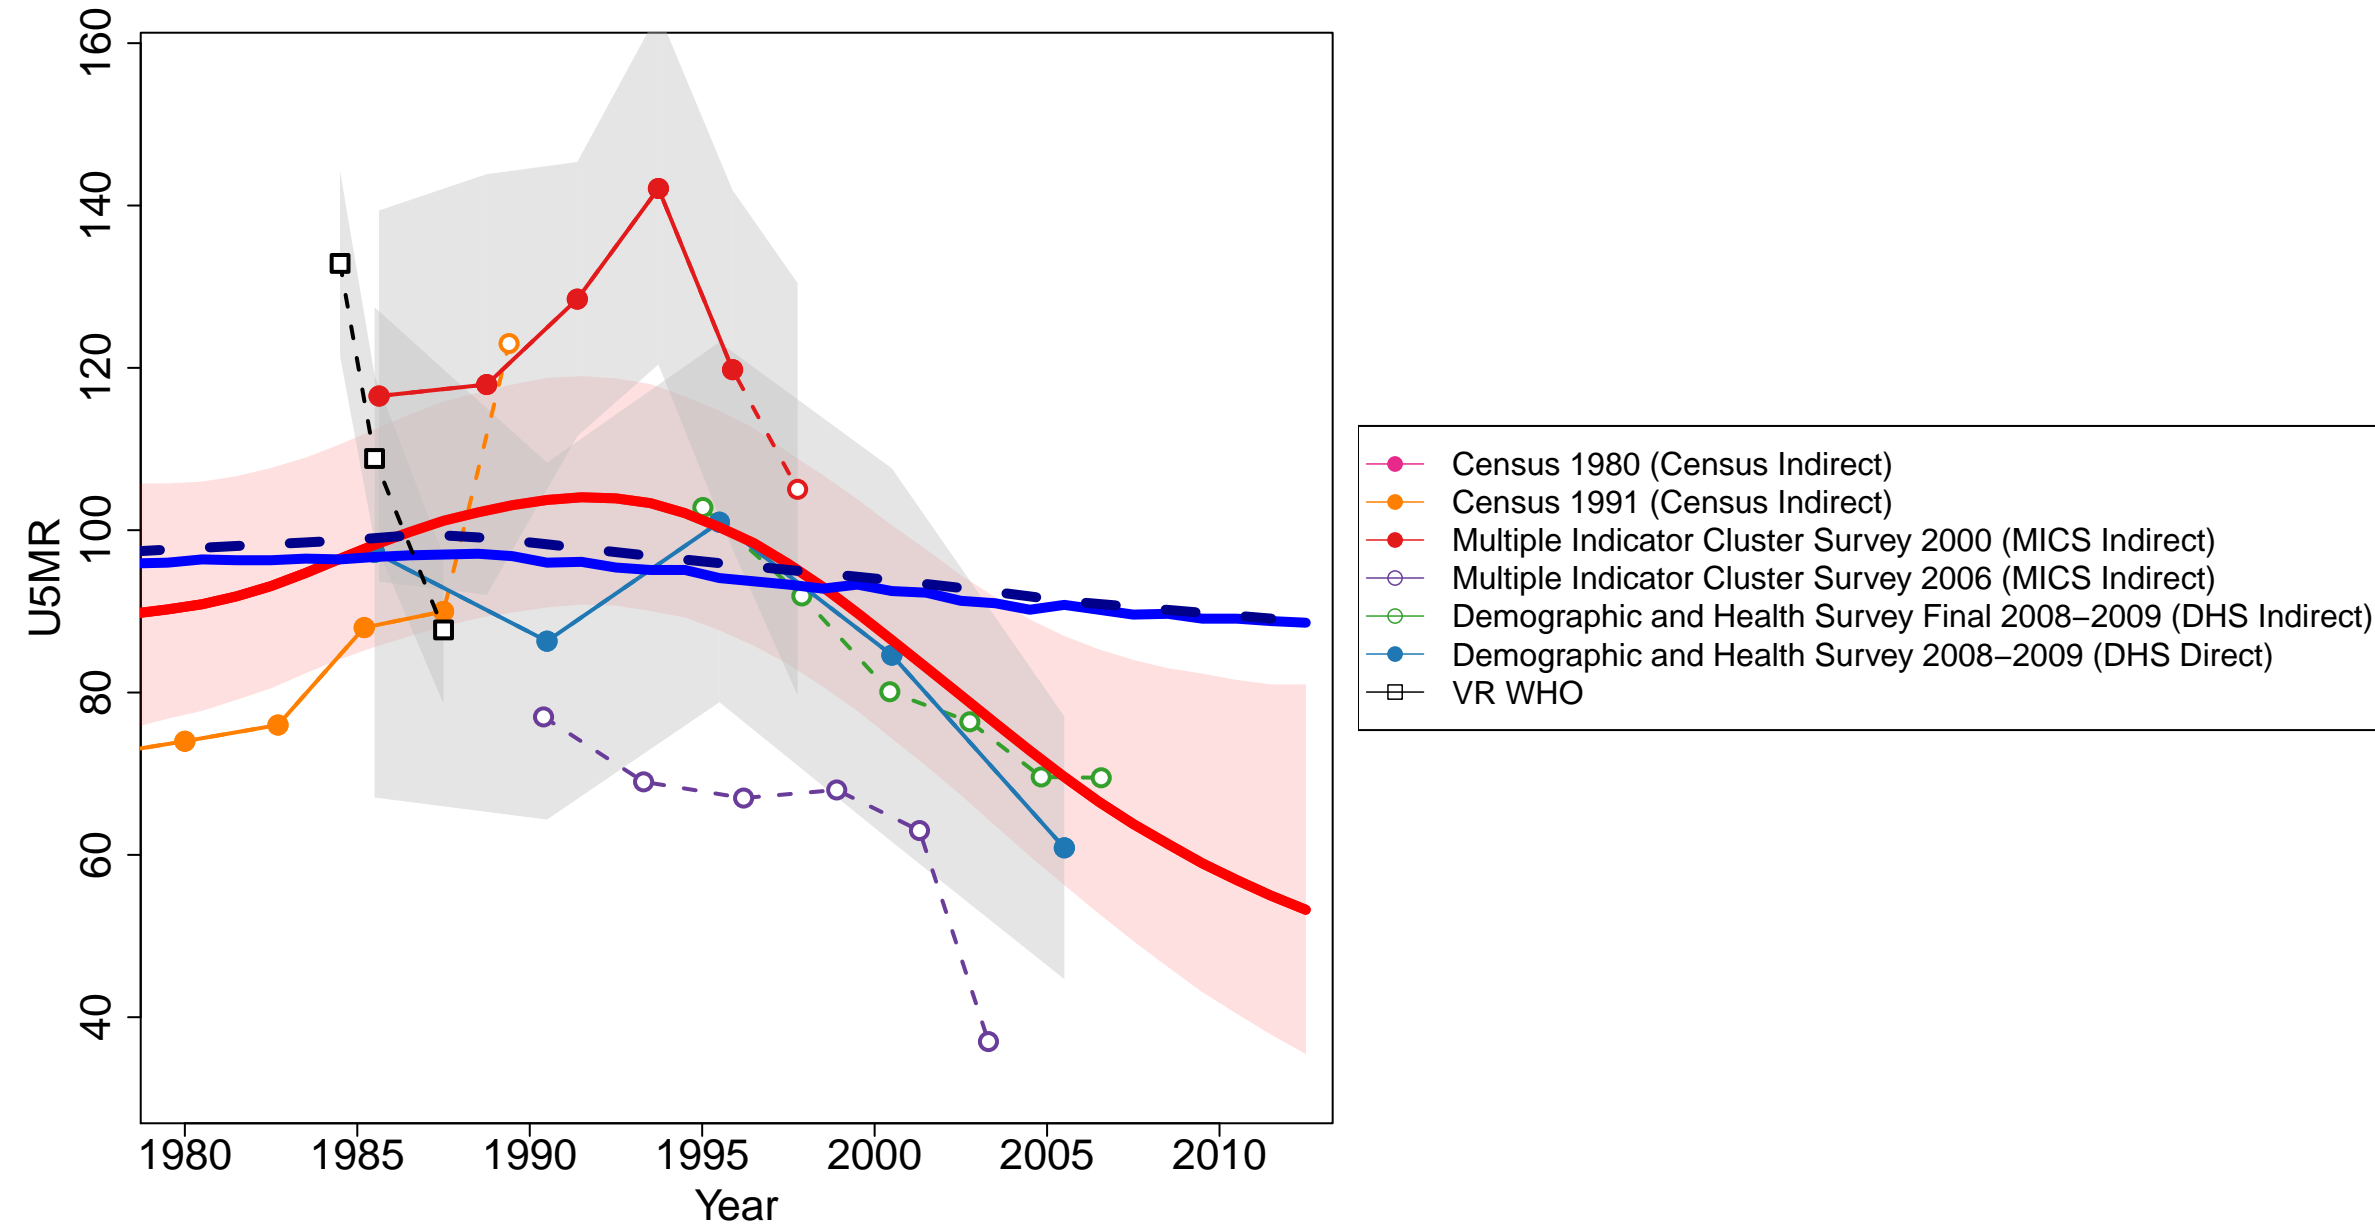

# Saudi Arabia

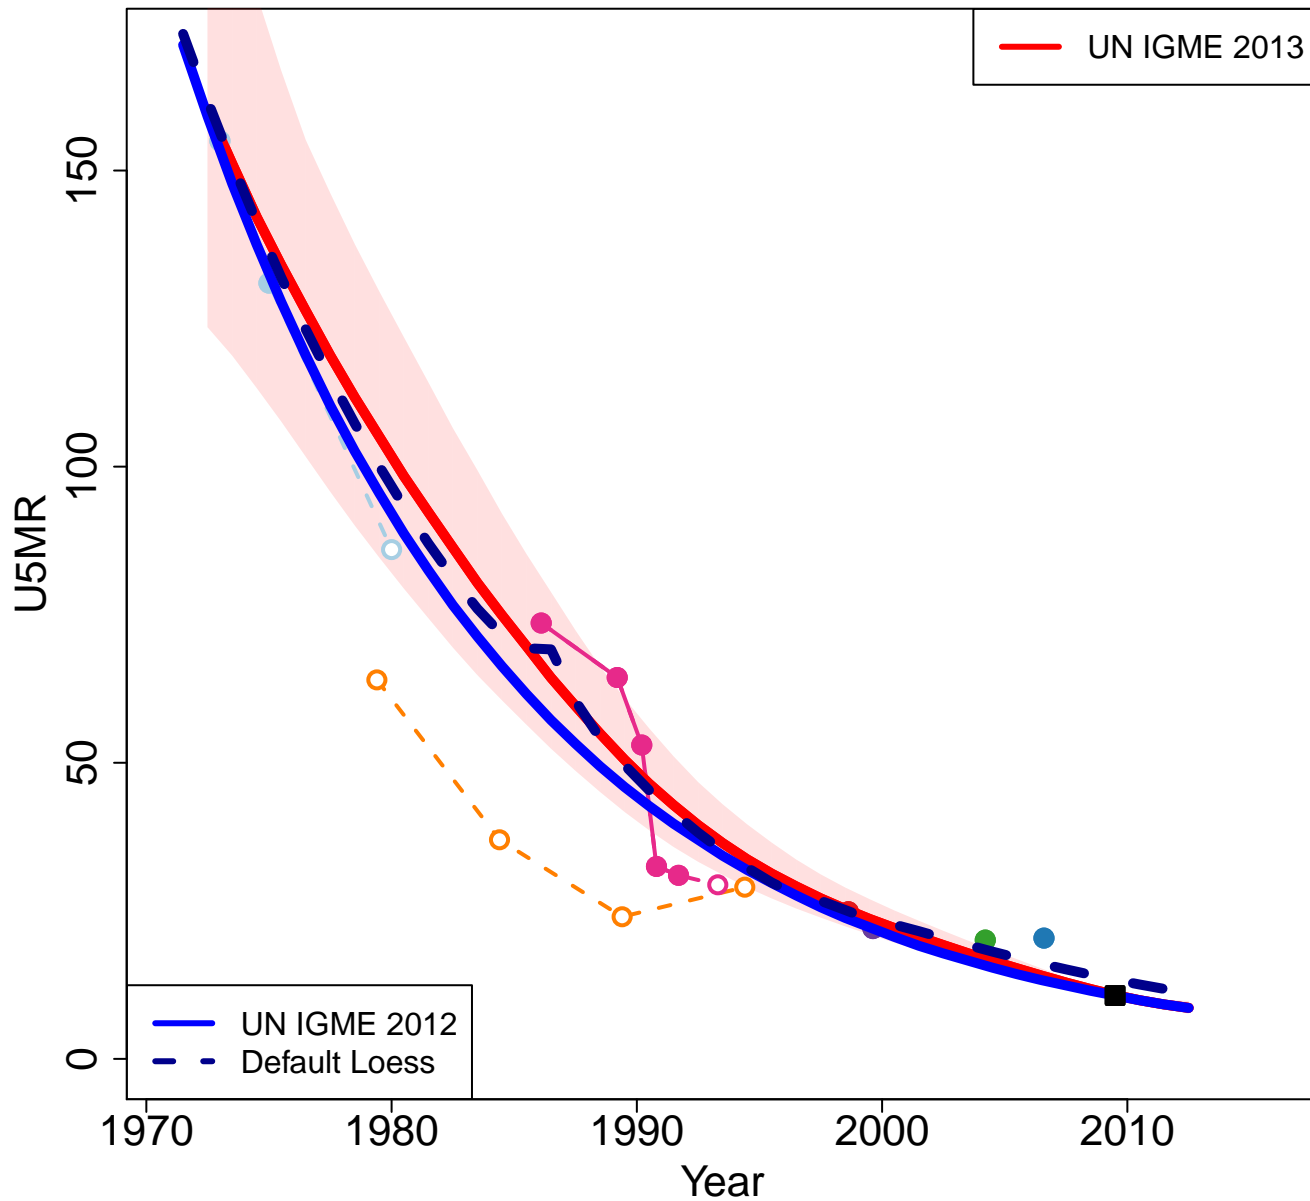

## Zoomed in

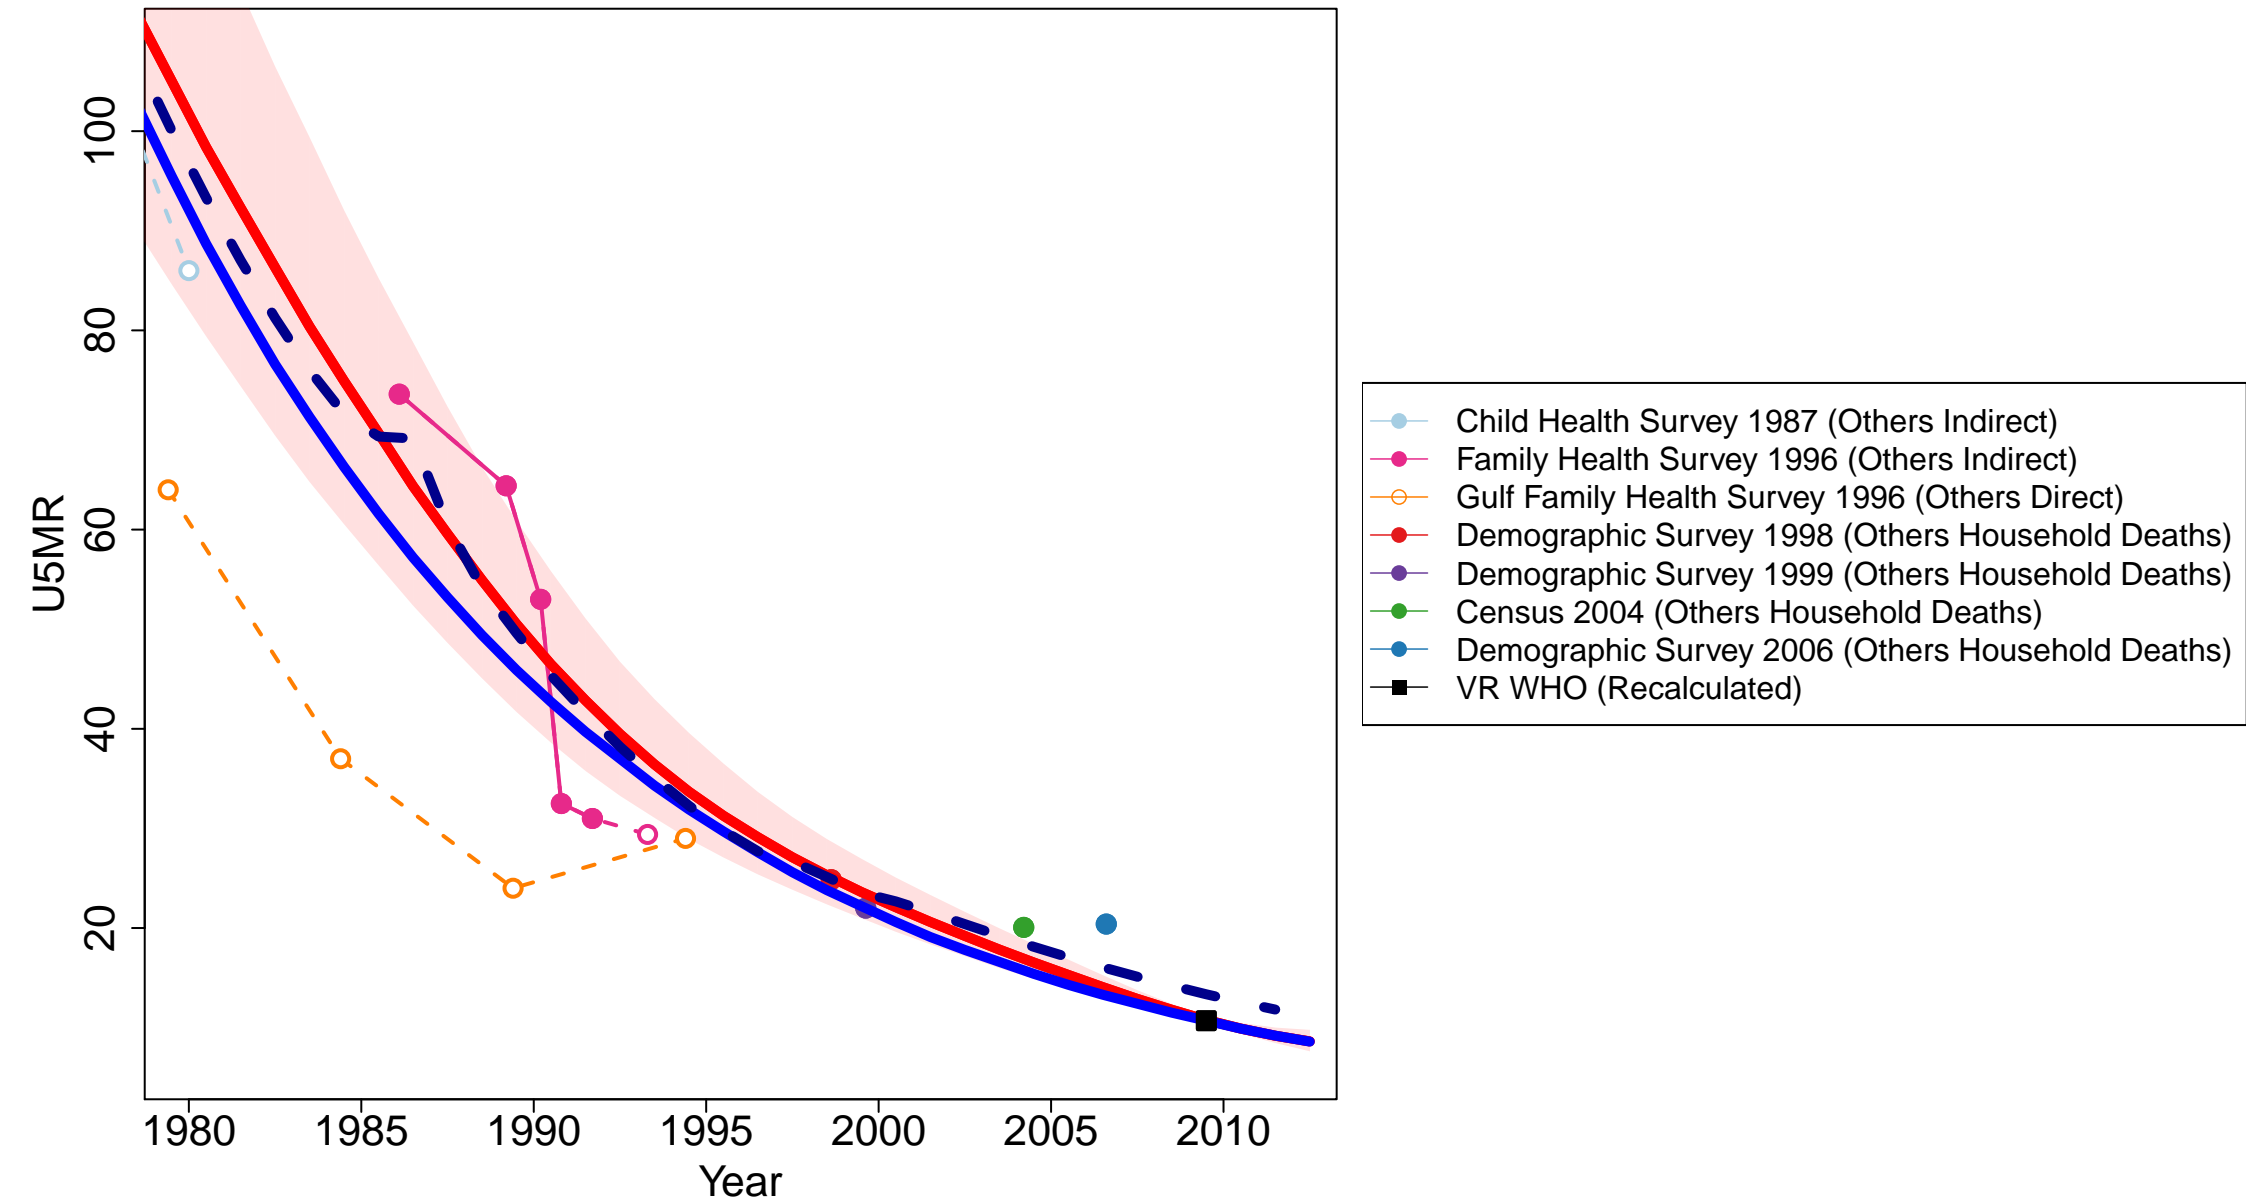

# Senegal

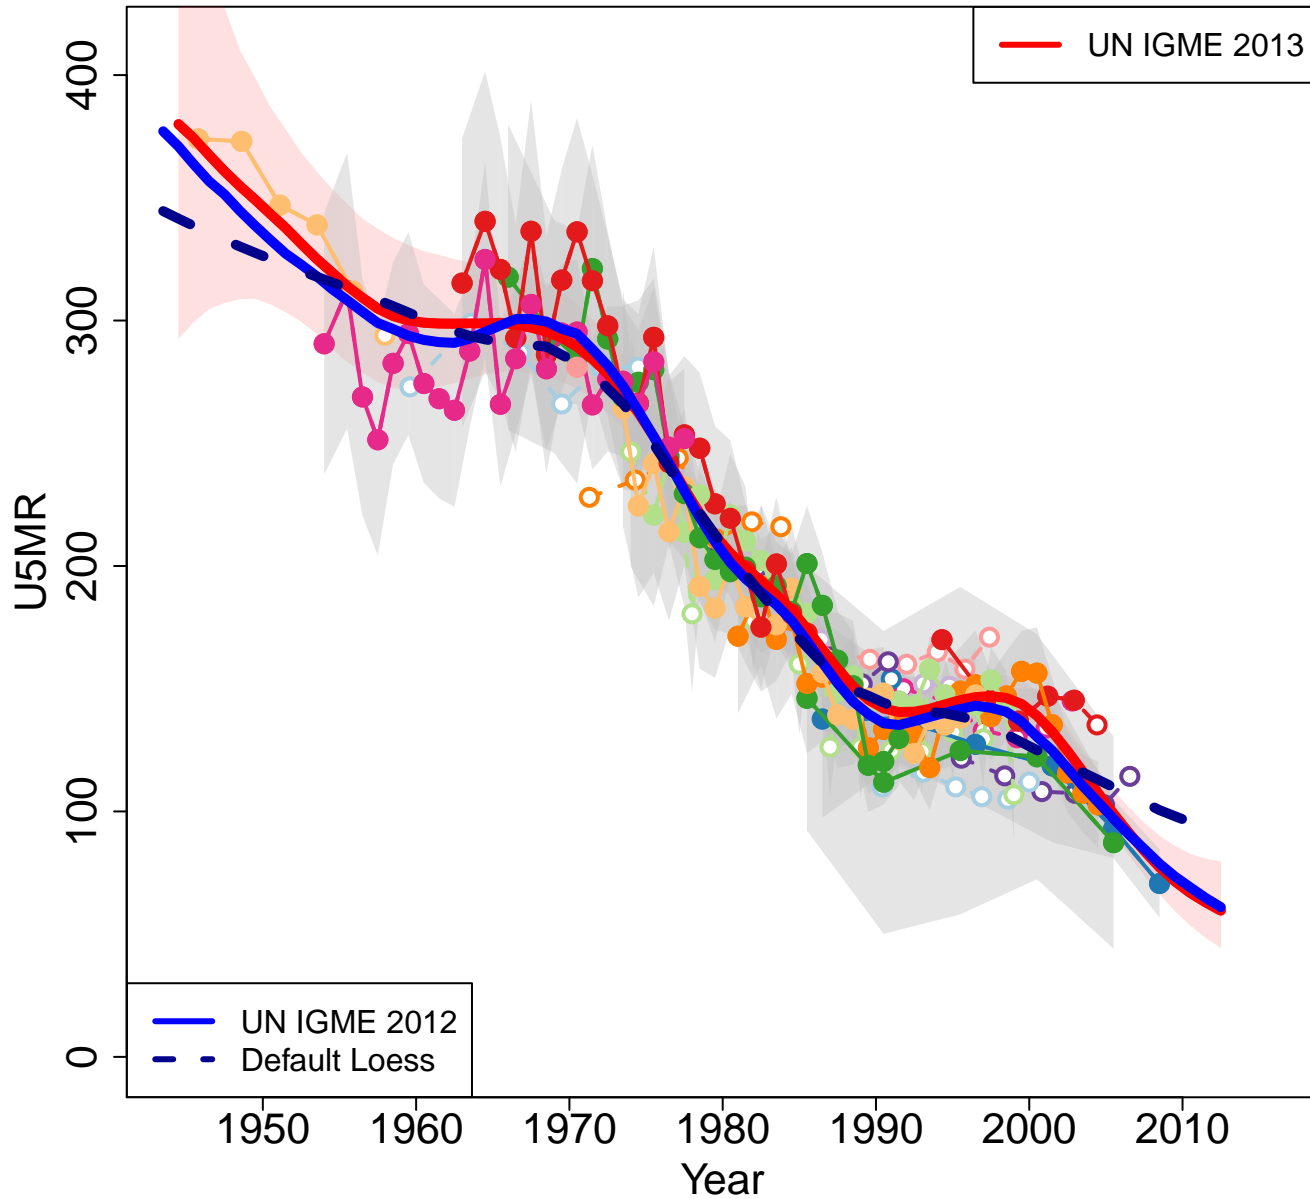

# Zoomed in

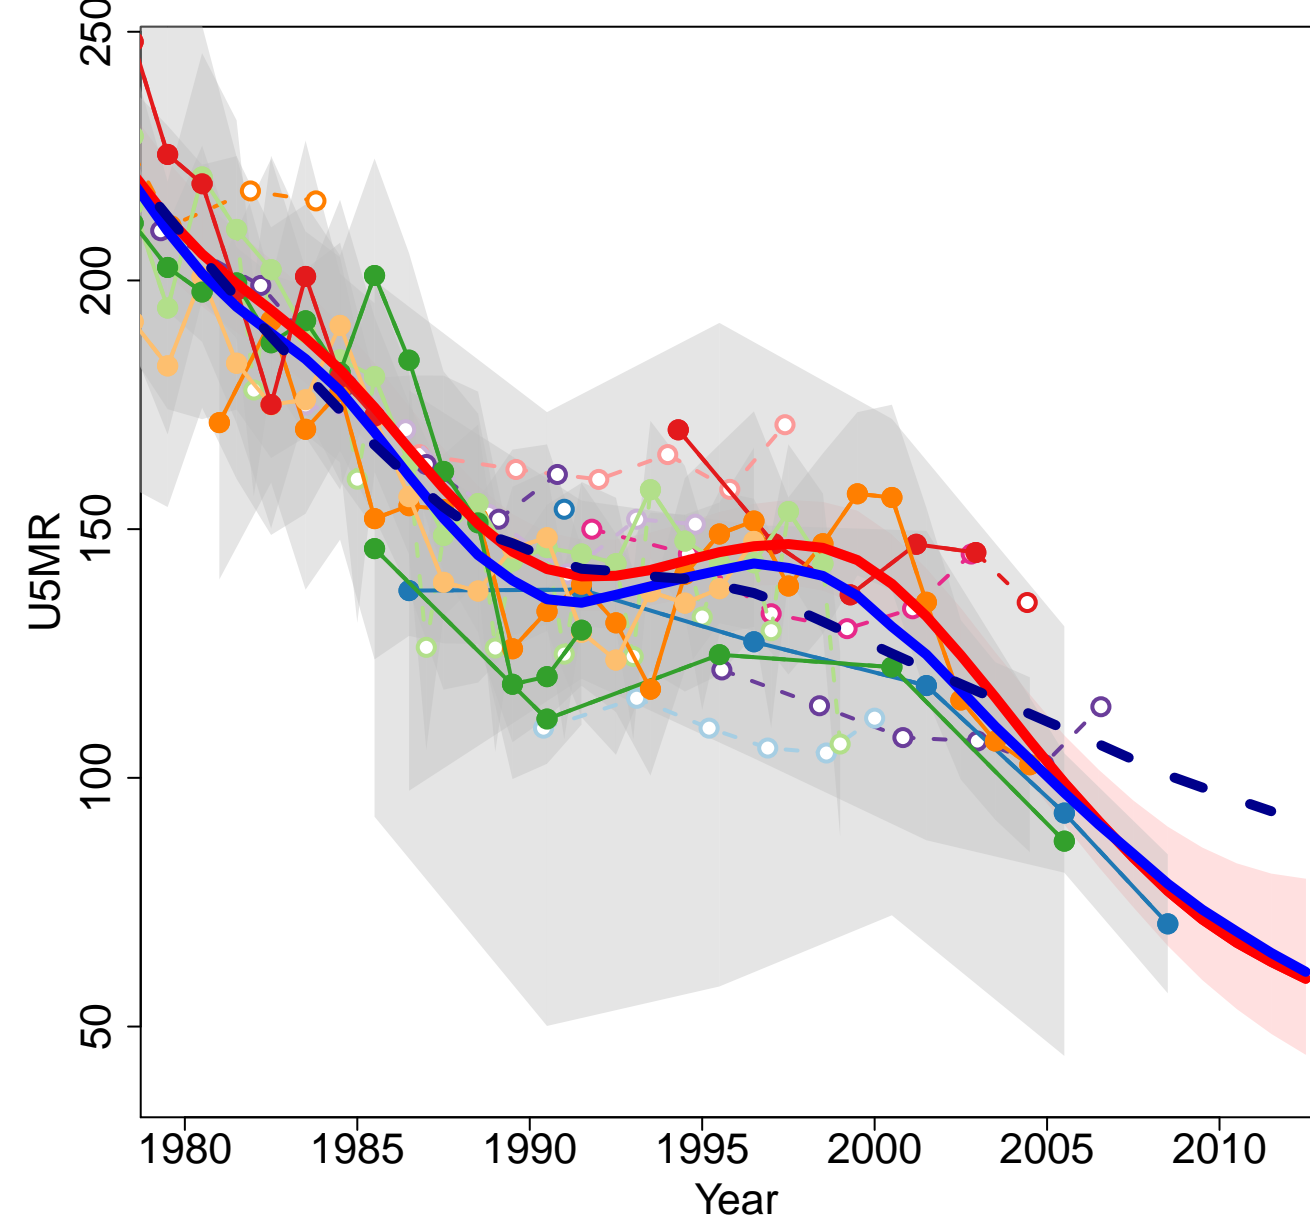

- Survey 1960–1961 (Others Indirect)
- Multiround Survey 1970 (Others Household Deaths)
- Multiround Survey 1978 (Others Household Deaths)
- World Fertility Survey 1978 (Other DHS Indirect)
- World Fertility Survey 1978 (Other DHS Direct)
- Demographic and Health Survey 1986 (DHS Indirect)
- Demographic and Health Survey 1986 (DHS Direct)
- Demographic and Health Survey 1992–1993 (DHS Indirect)
- Demographic and Health Survey 1992–1993 (DHS Direct)
- Multiple Indicator Cluster Survey 1996 (MICS Indirect)
- Demographic and Health Survey 1997 (DHS Indirect)
- Demographic and Health Survey 1997 (DHS Direct)
- Demographic and Health Survey 1999–2000 (DHS Indirect)
- Demographic and Health Survey 1999–2000 (DHS Direct)
- Census 2002 (Census Indirect)
- Demographic and Health Survey 2005 (DHS Indirect)
- Demographic and Health Survey 2005 (DHS Direct)
- Malaria Indicator Survey 2006 (Other DHS Indirect)
- Malaria Indicator Survey 2008–2009 (Other DHS Indirect)
- Malaria Indicator Survey 2008–2009 (Other DHS Direct)
- Demographic and Health Survey 2010–2011 (DHS Direct)

# Seychelles

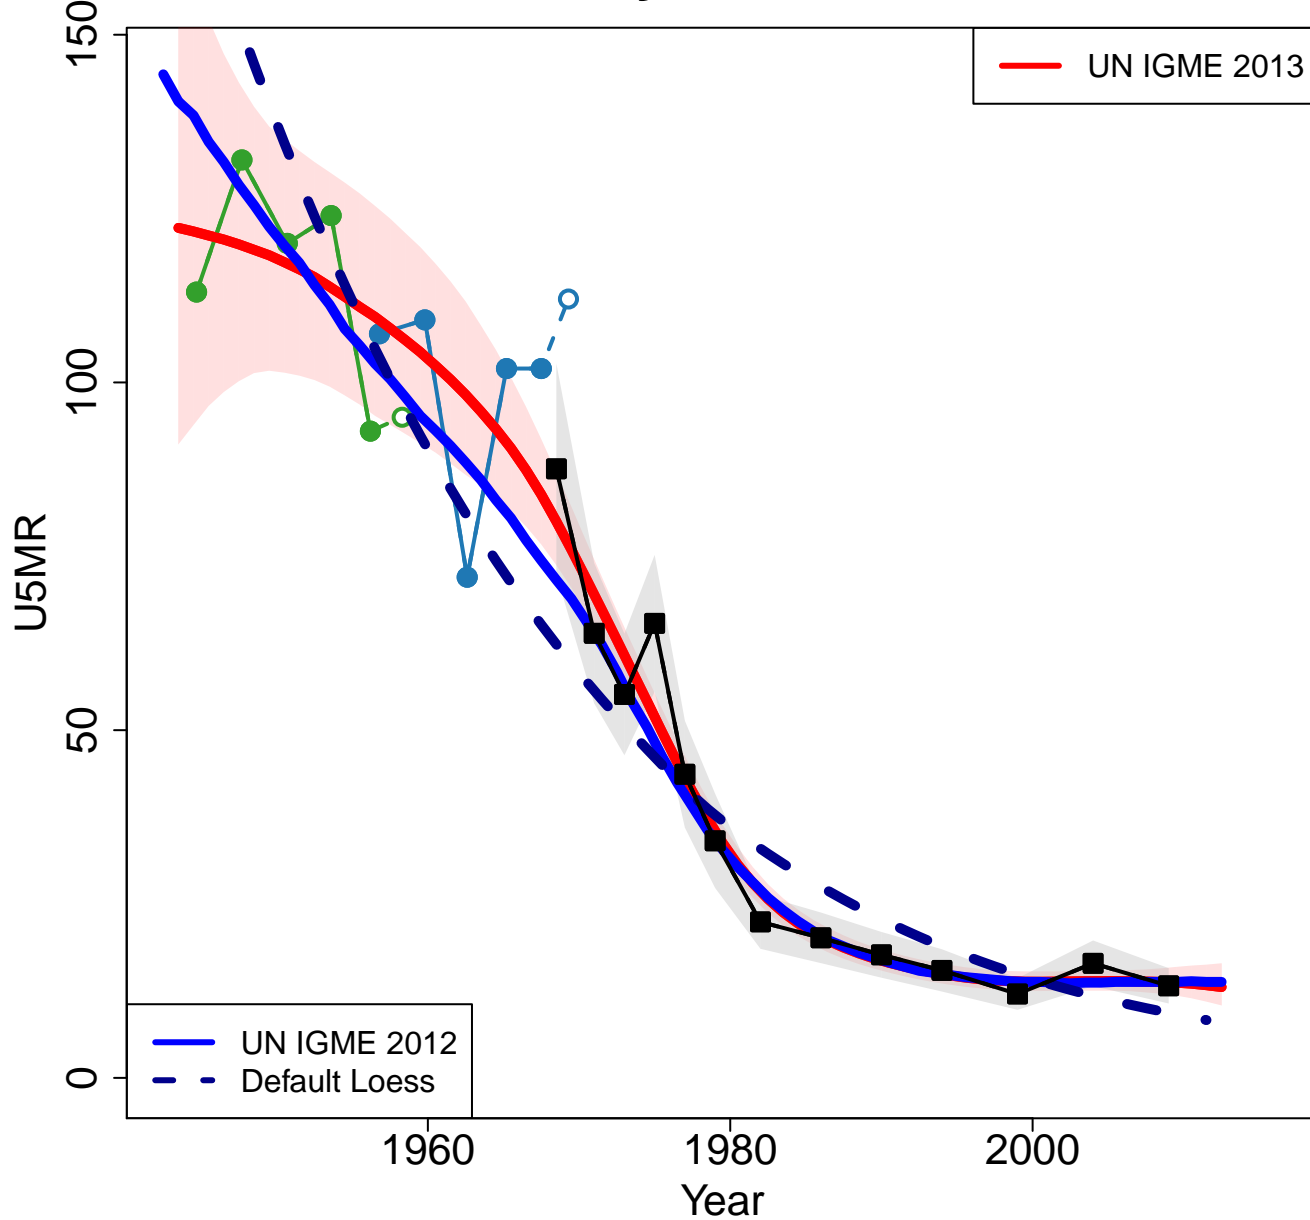

# Zoomed in

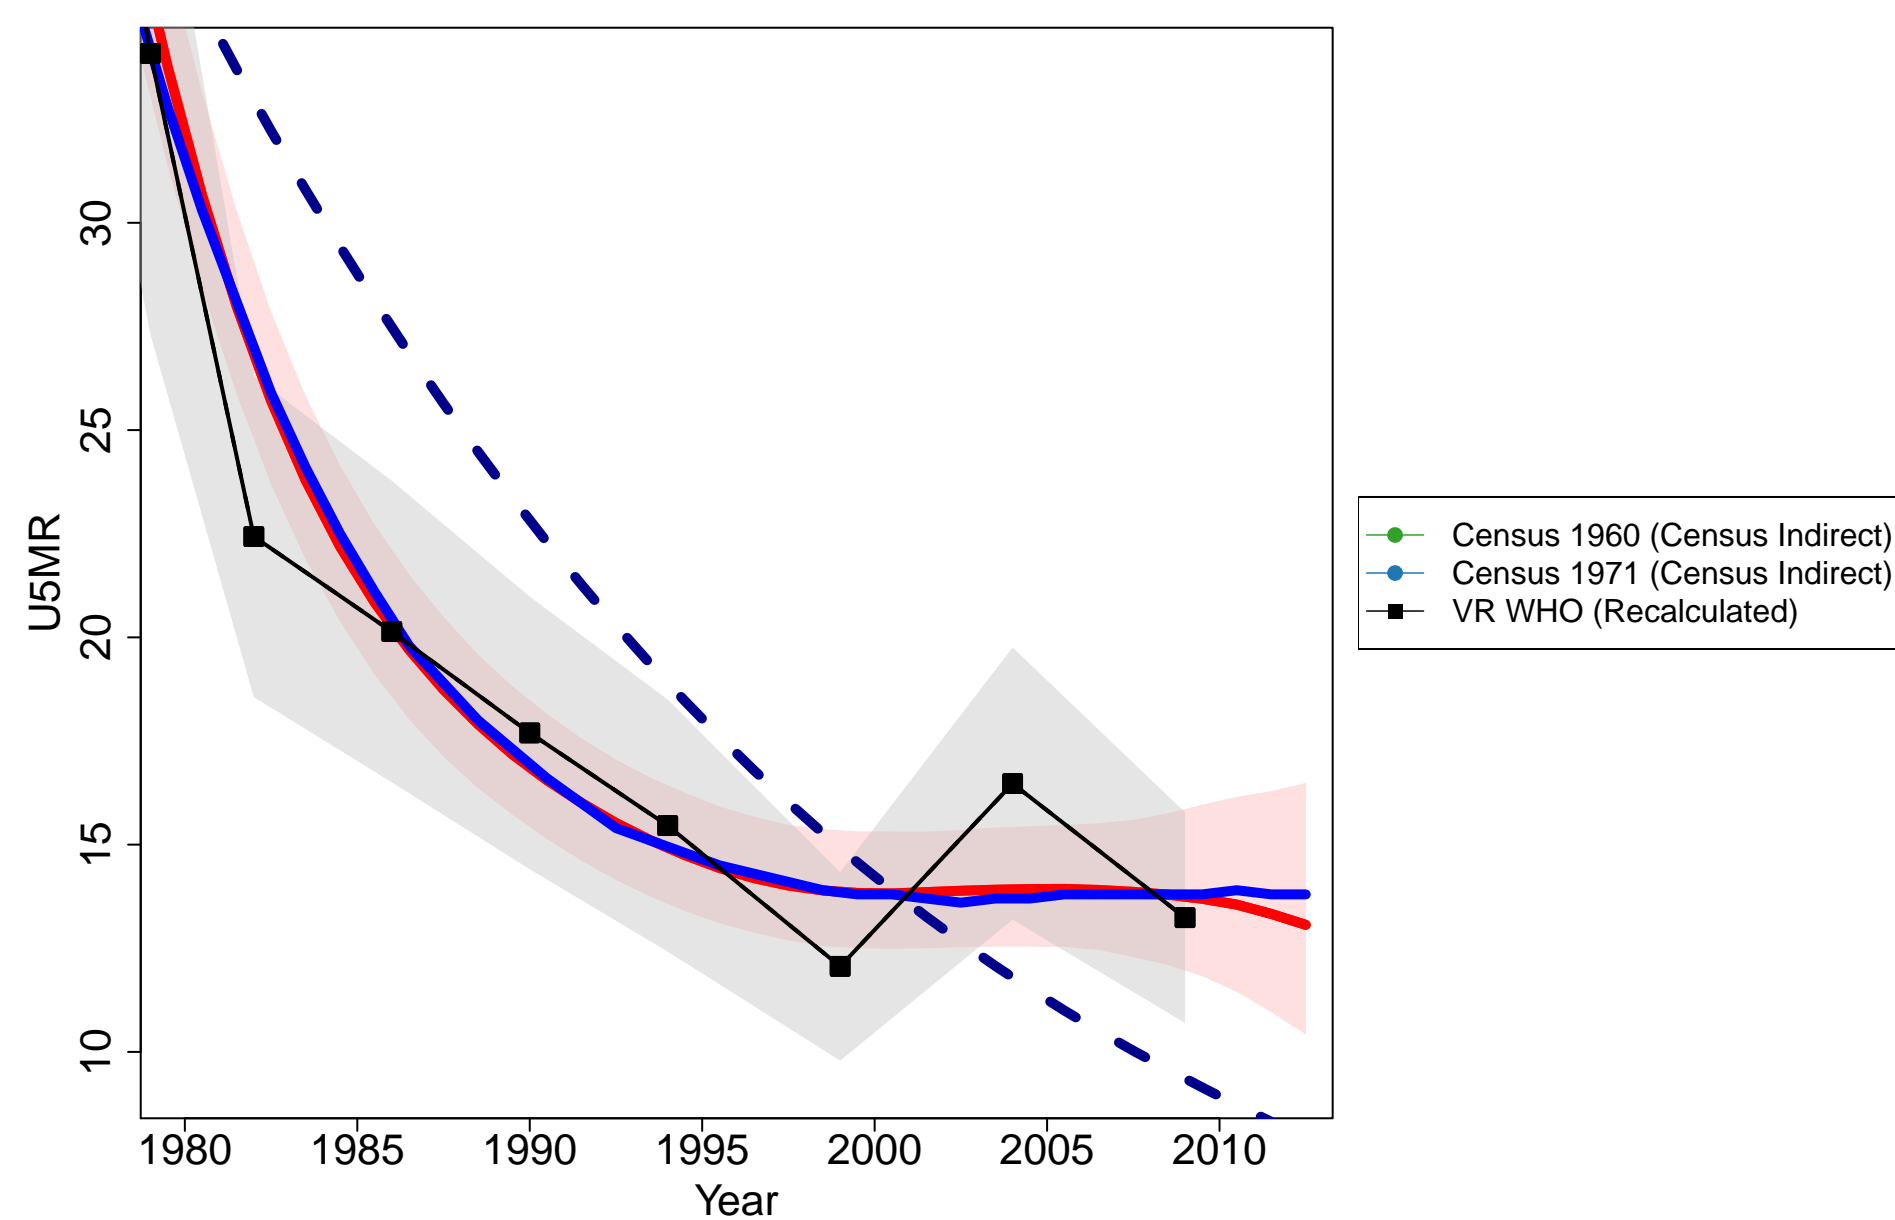

# Sierra Leone

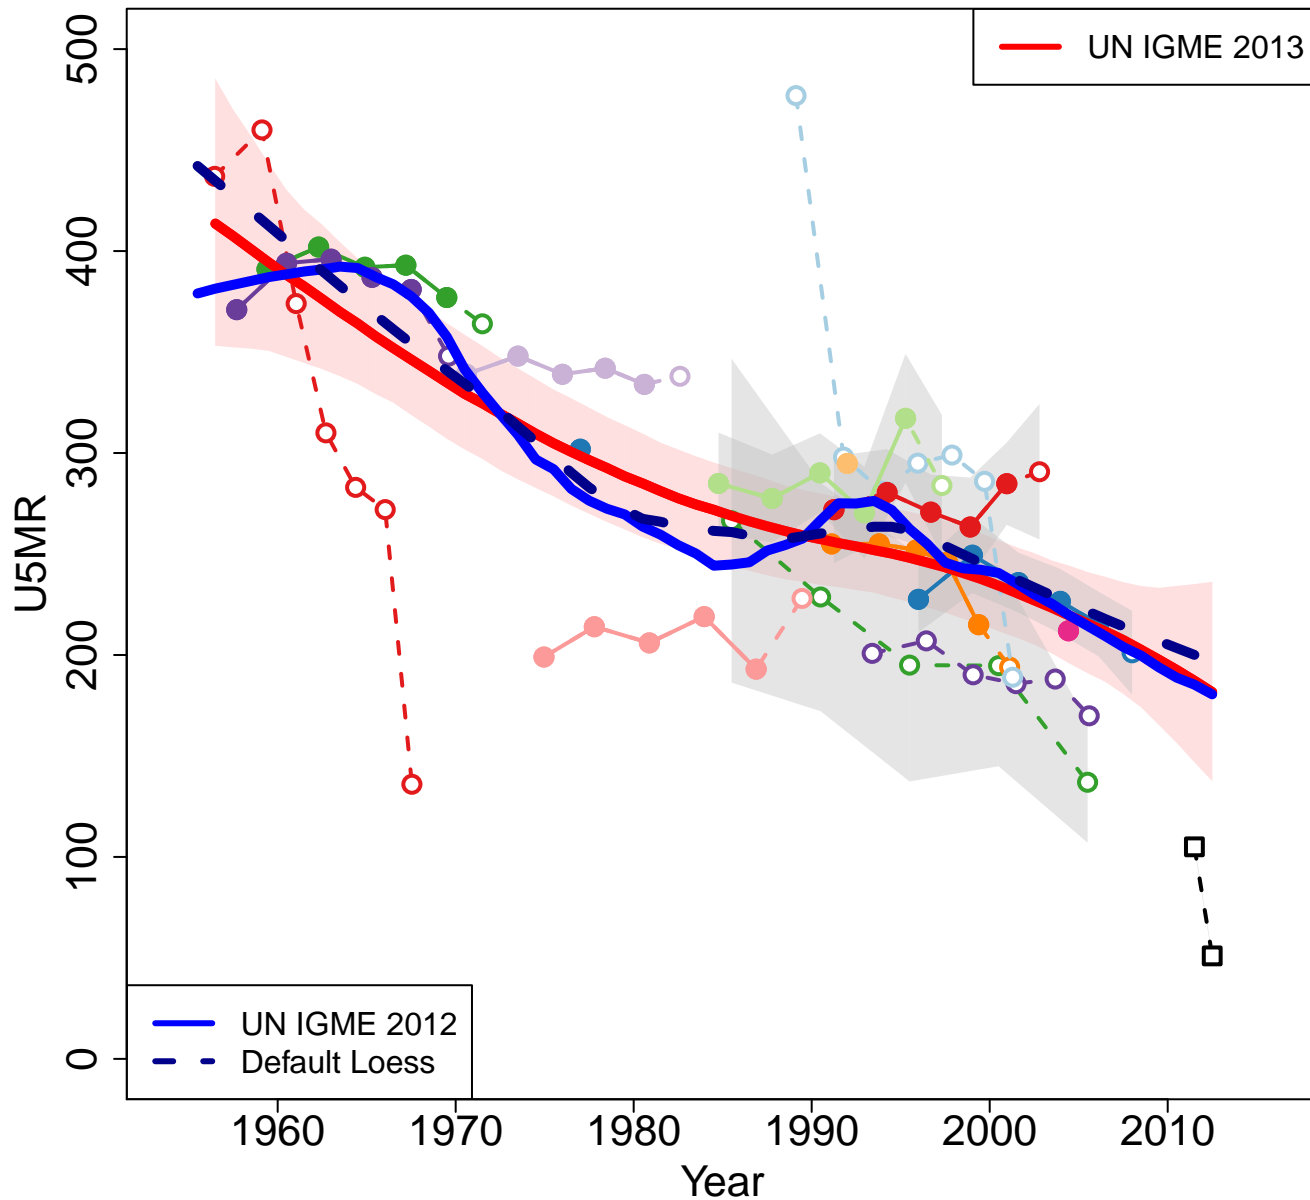

# Zoomed in

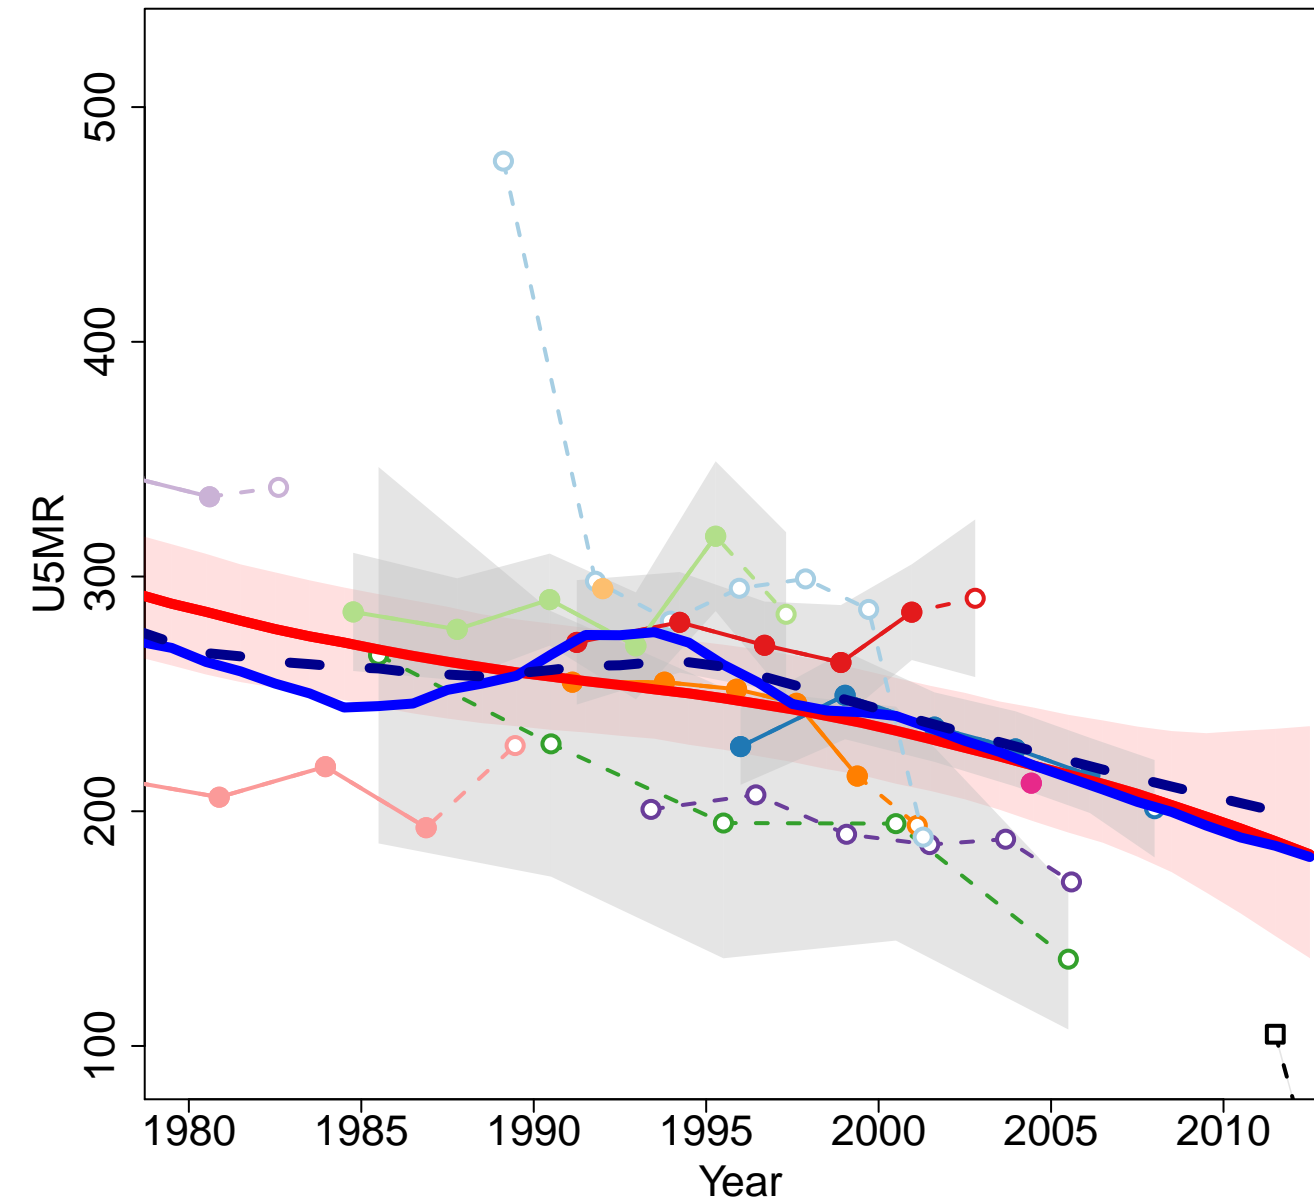

# Solomon Islands

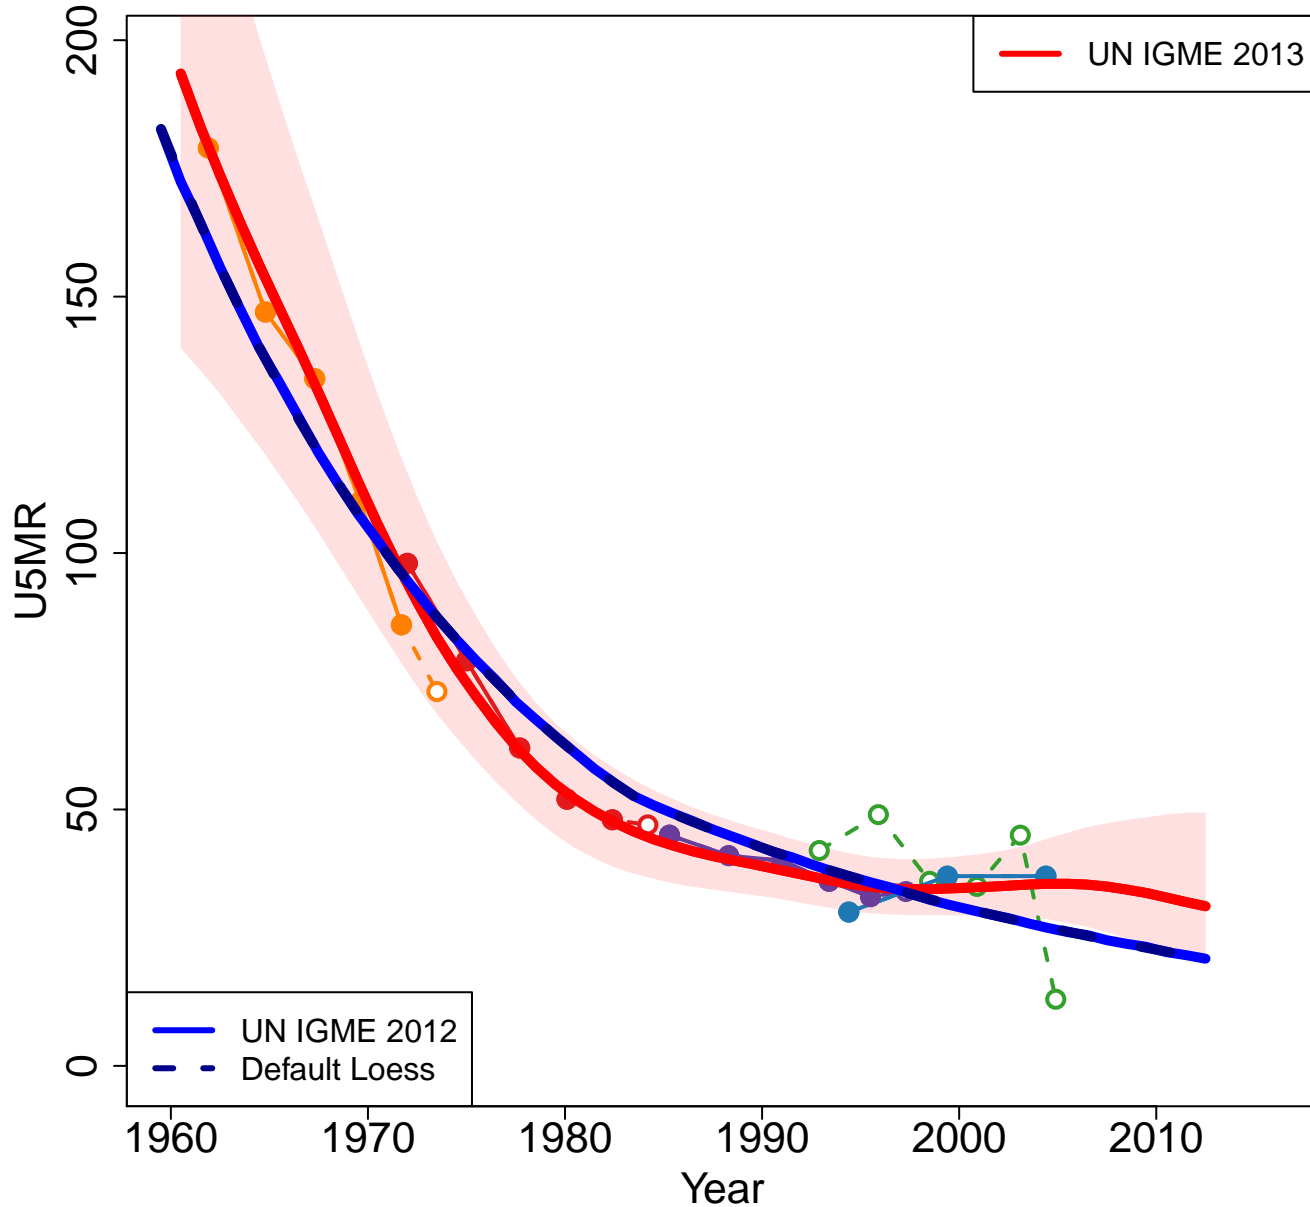

# Zoomed in

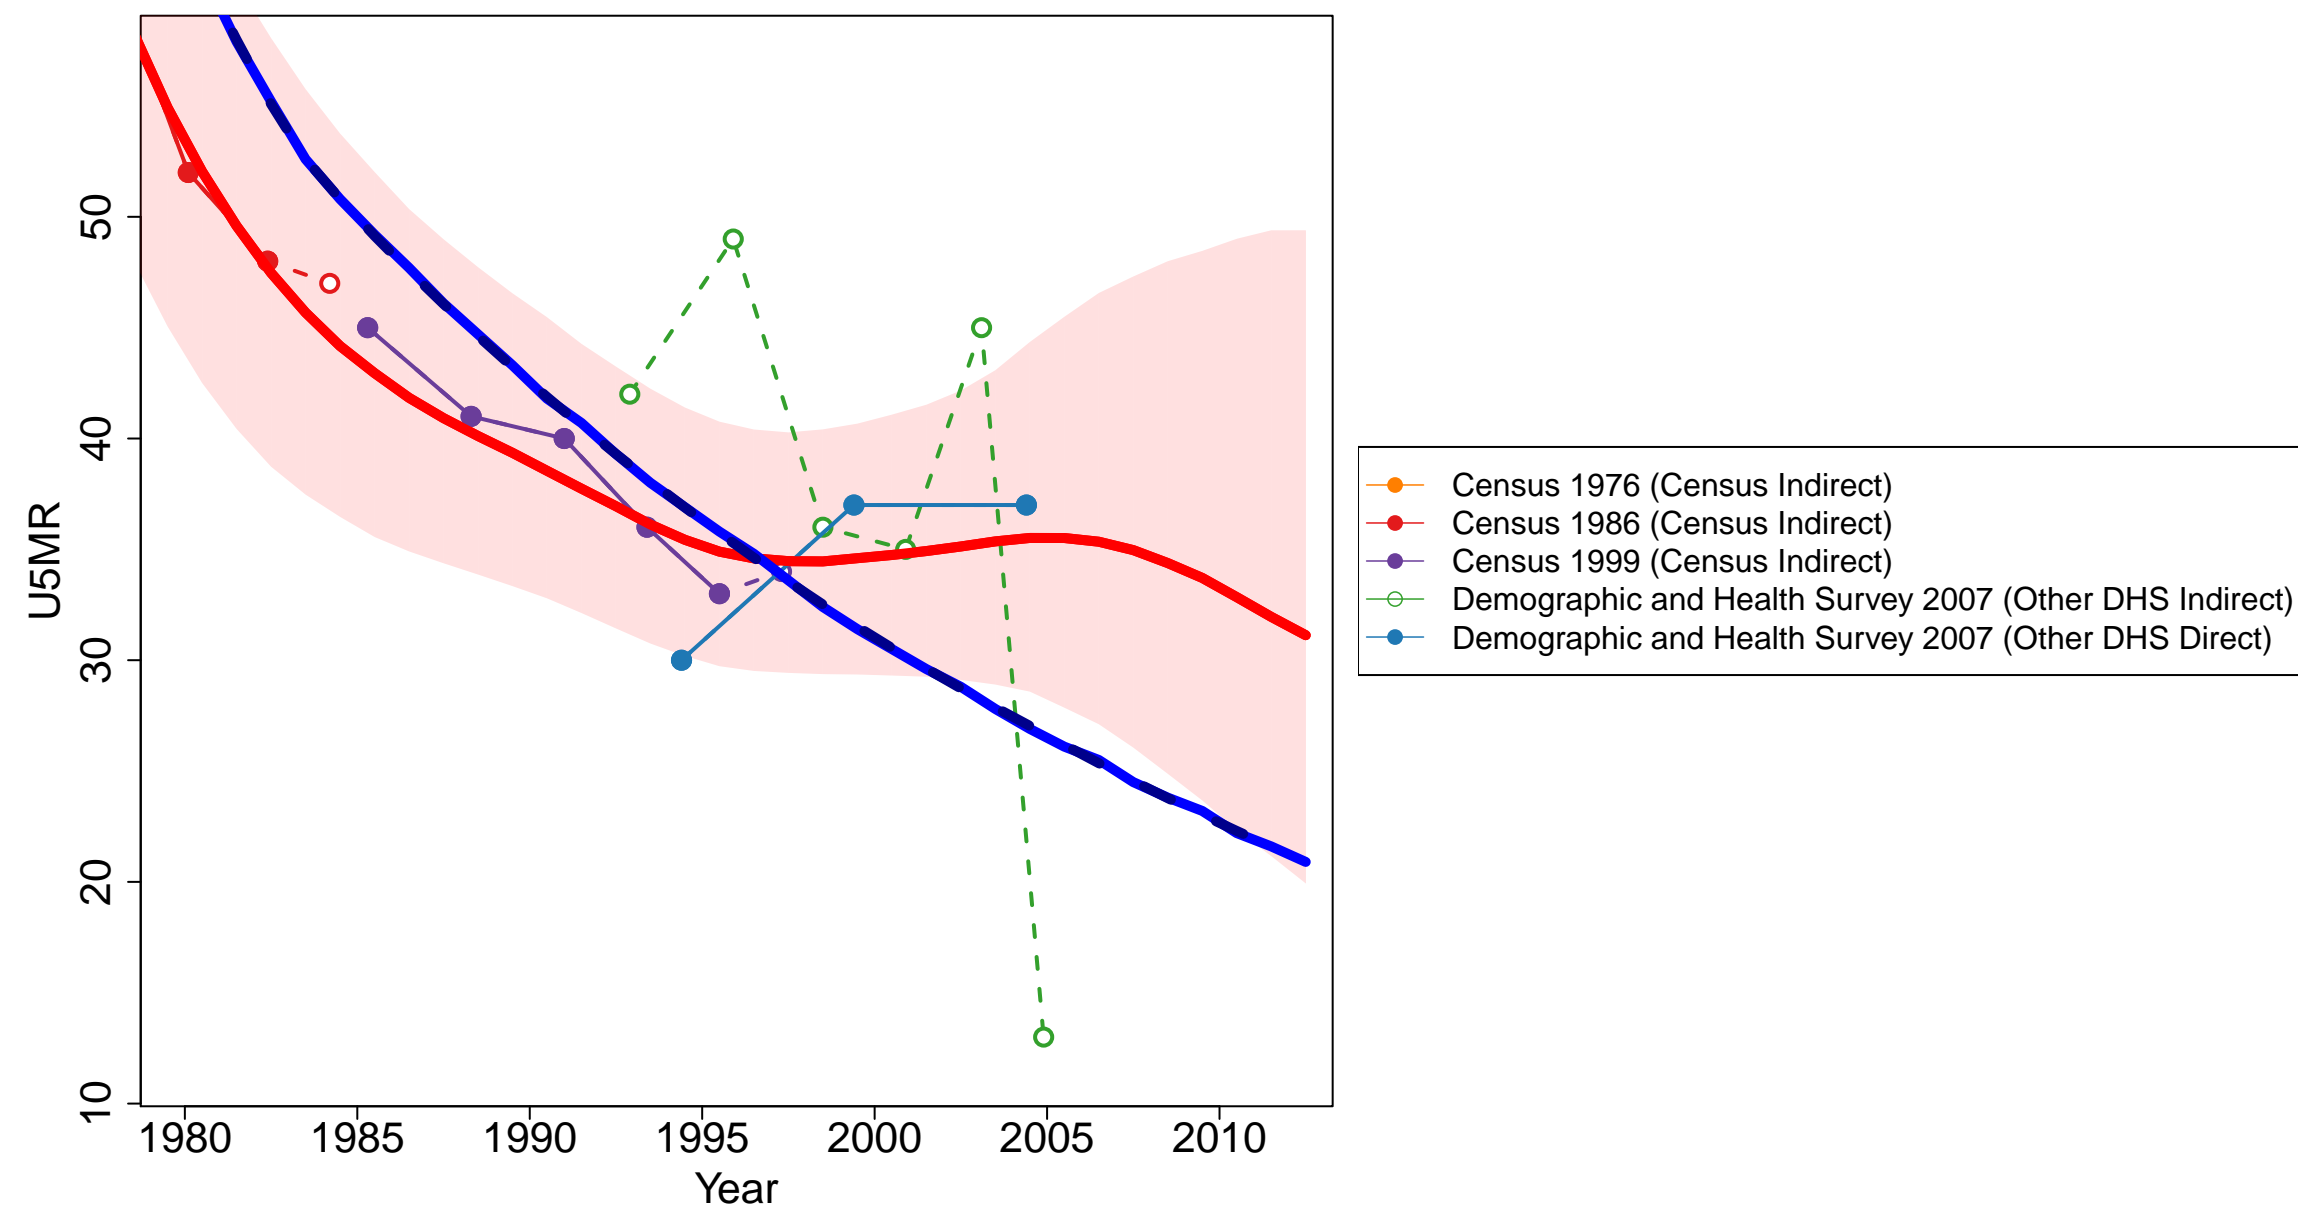



# Sri Lanka

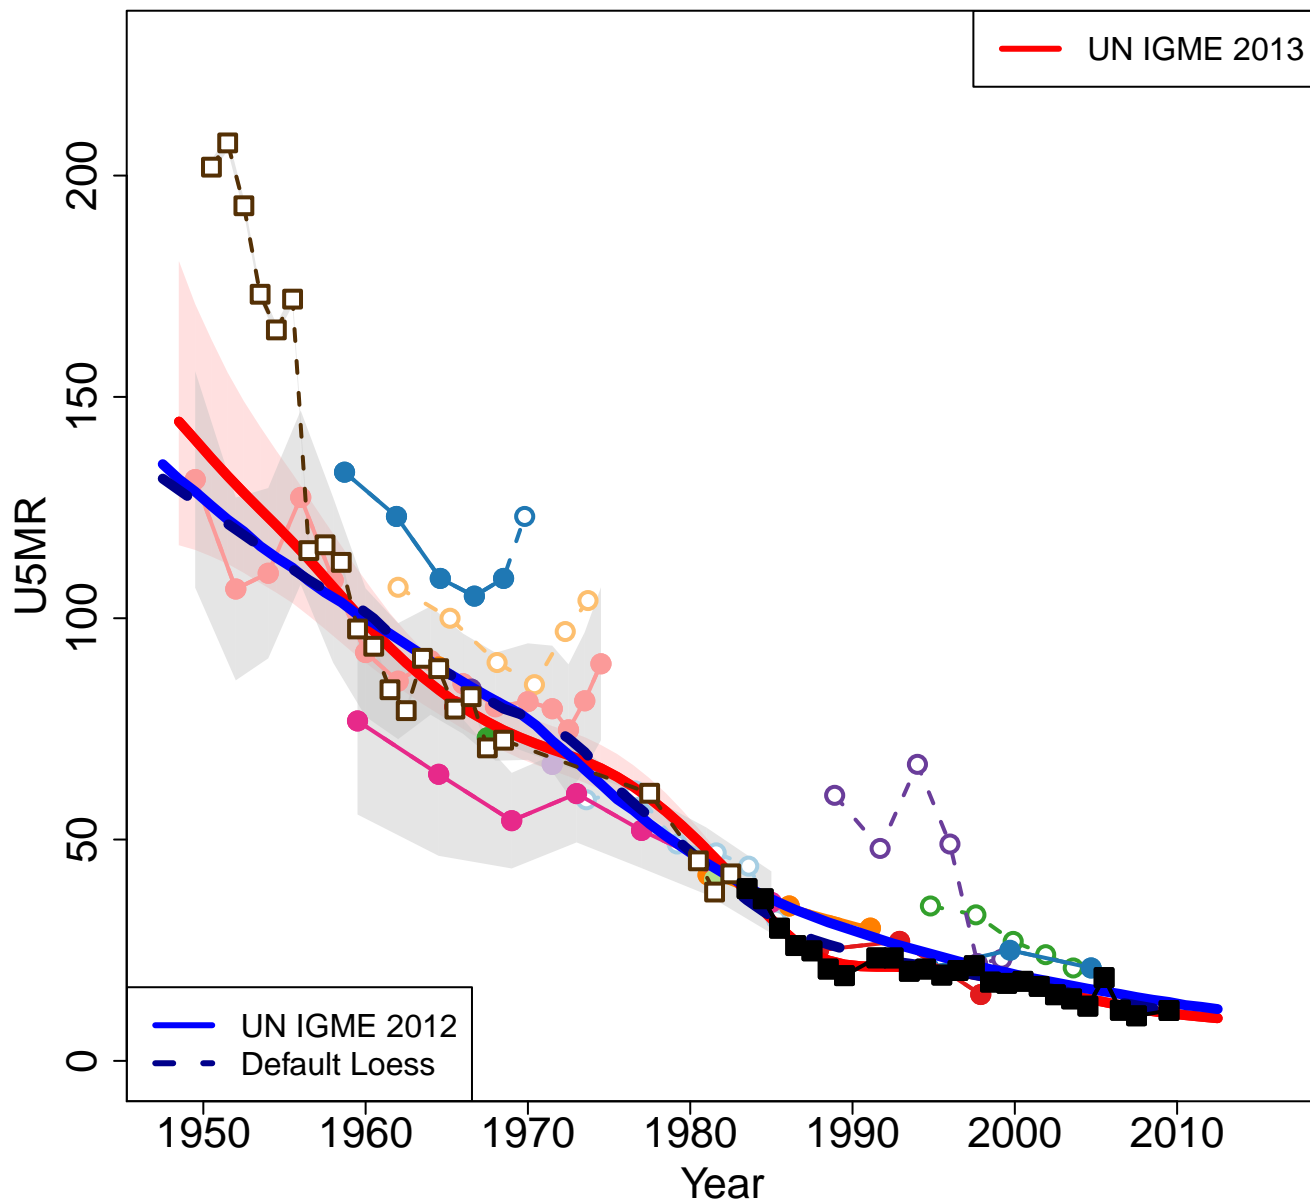

# Zoomed in

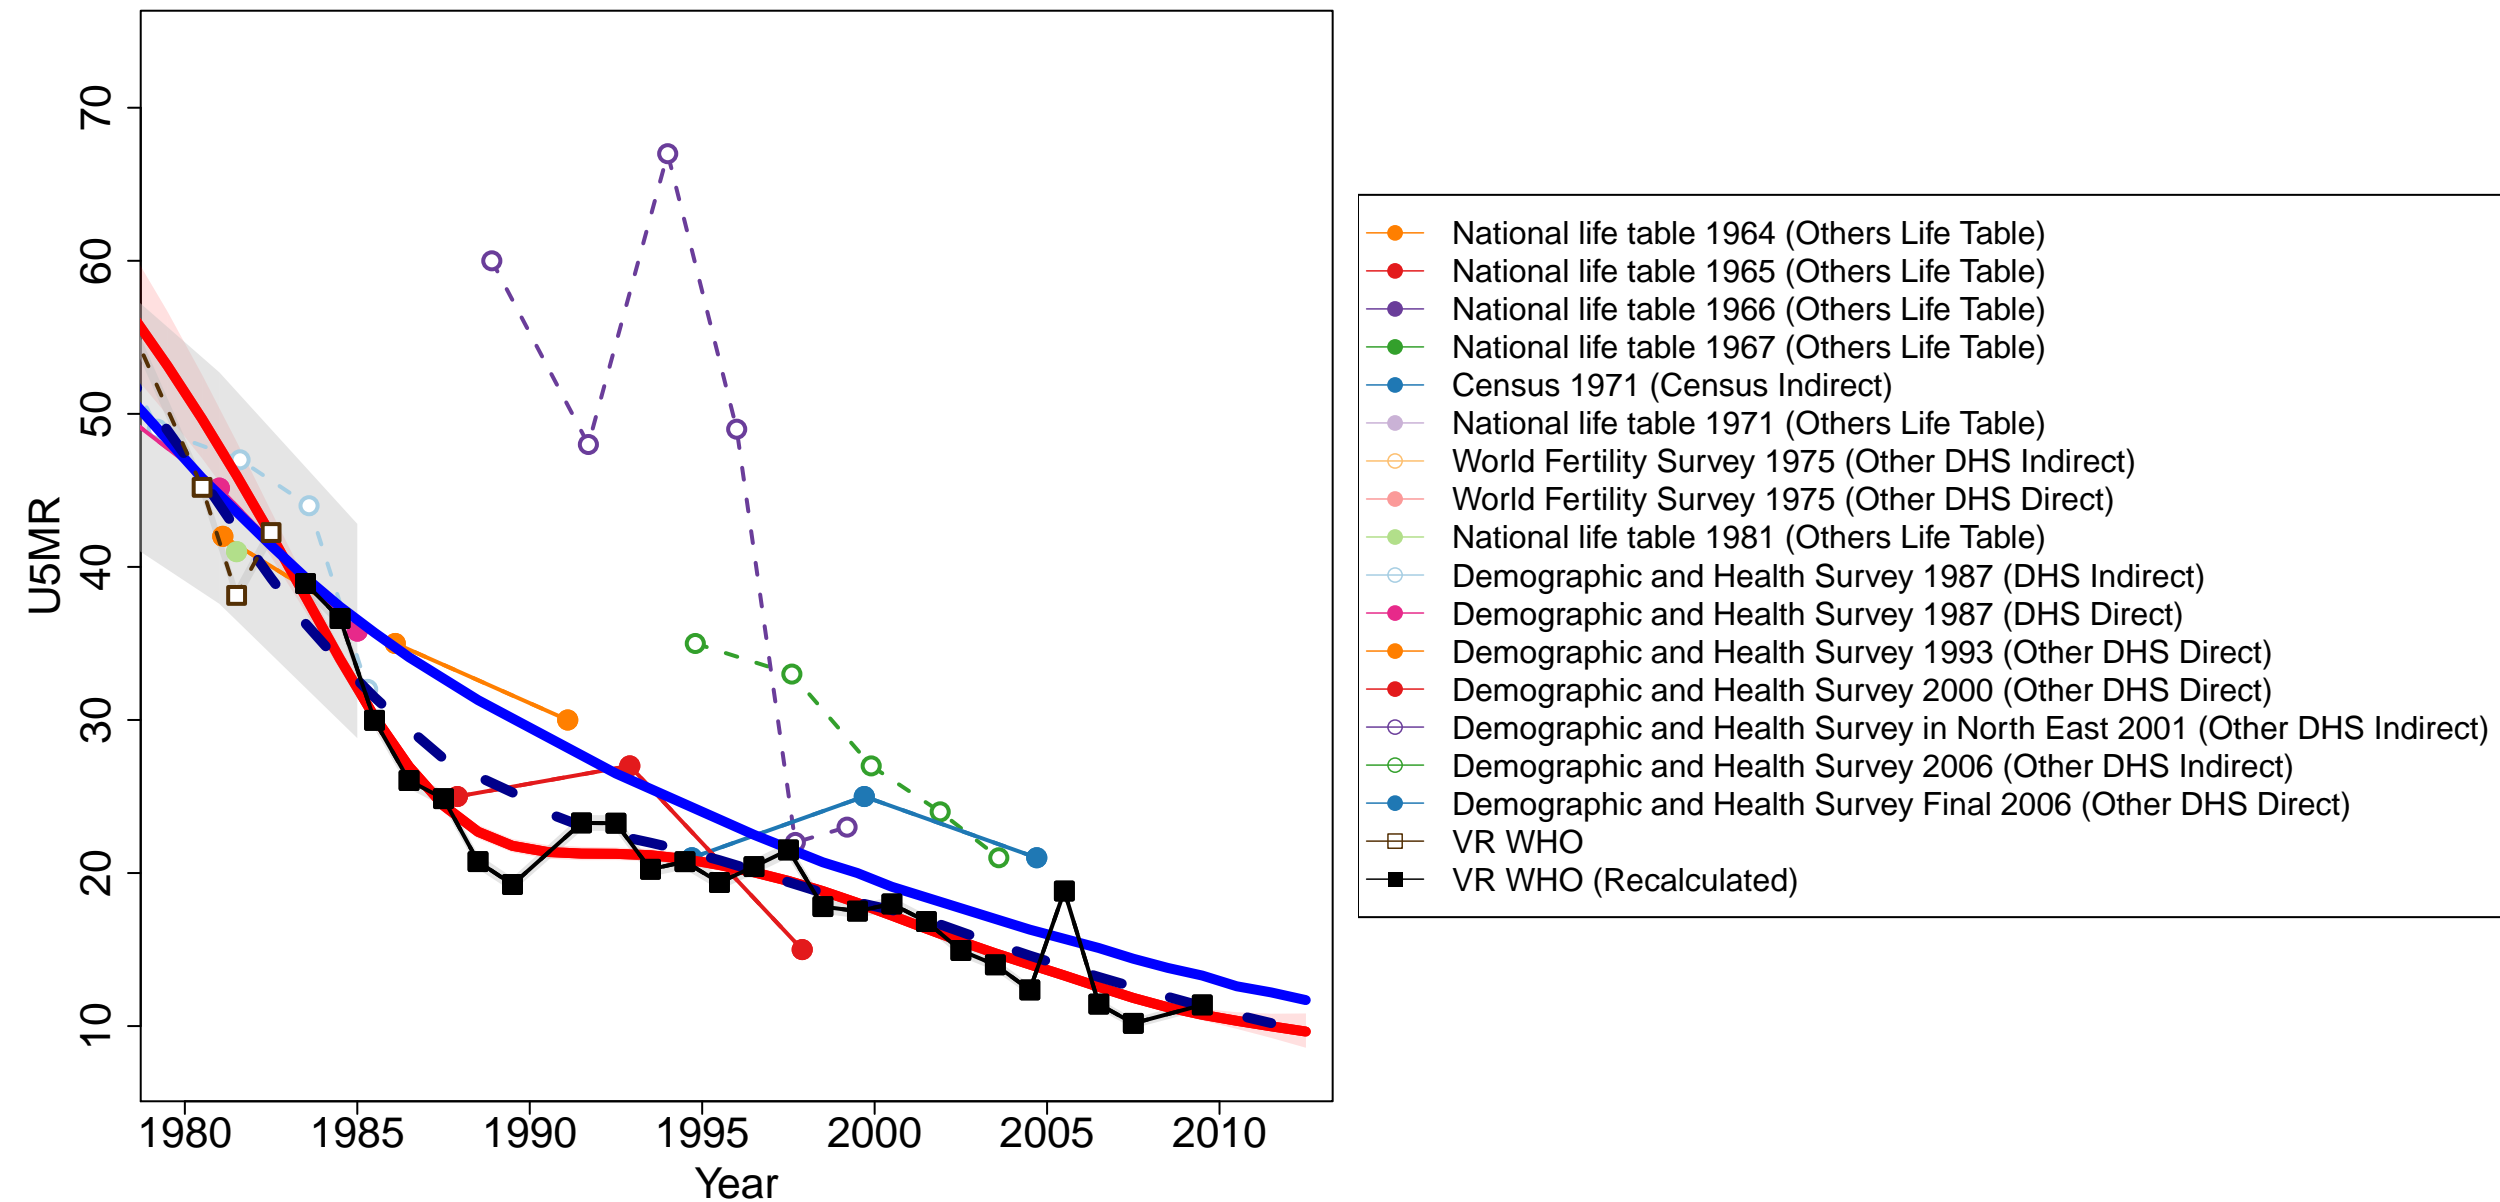

# Sudan

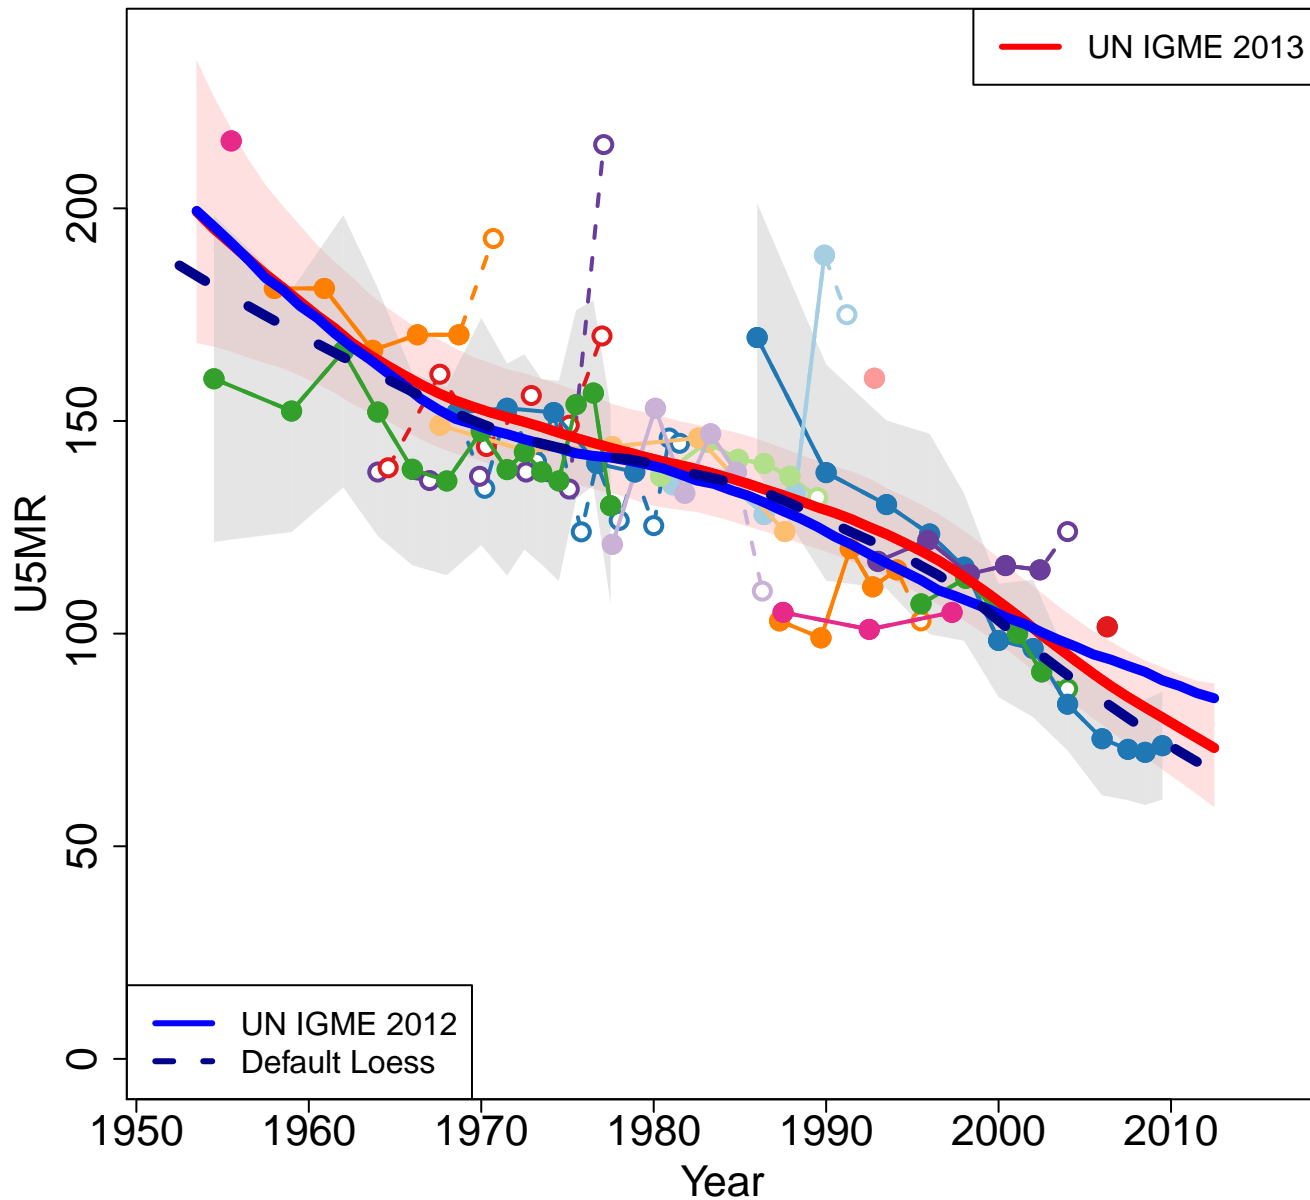

# Zoomed in

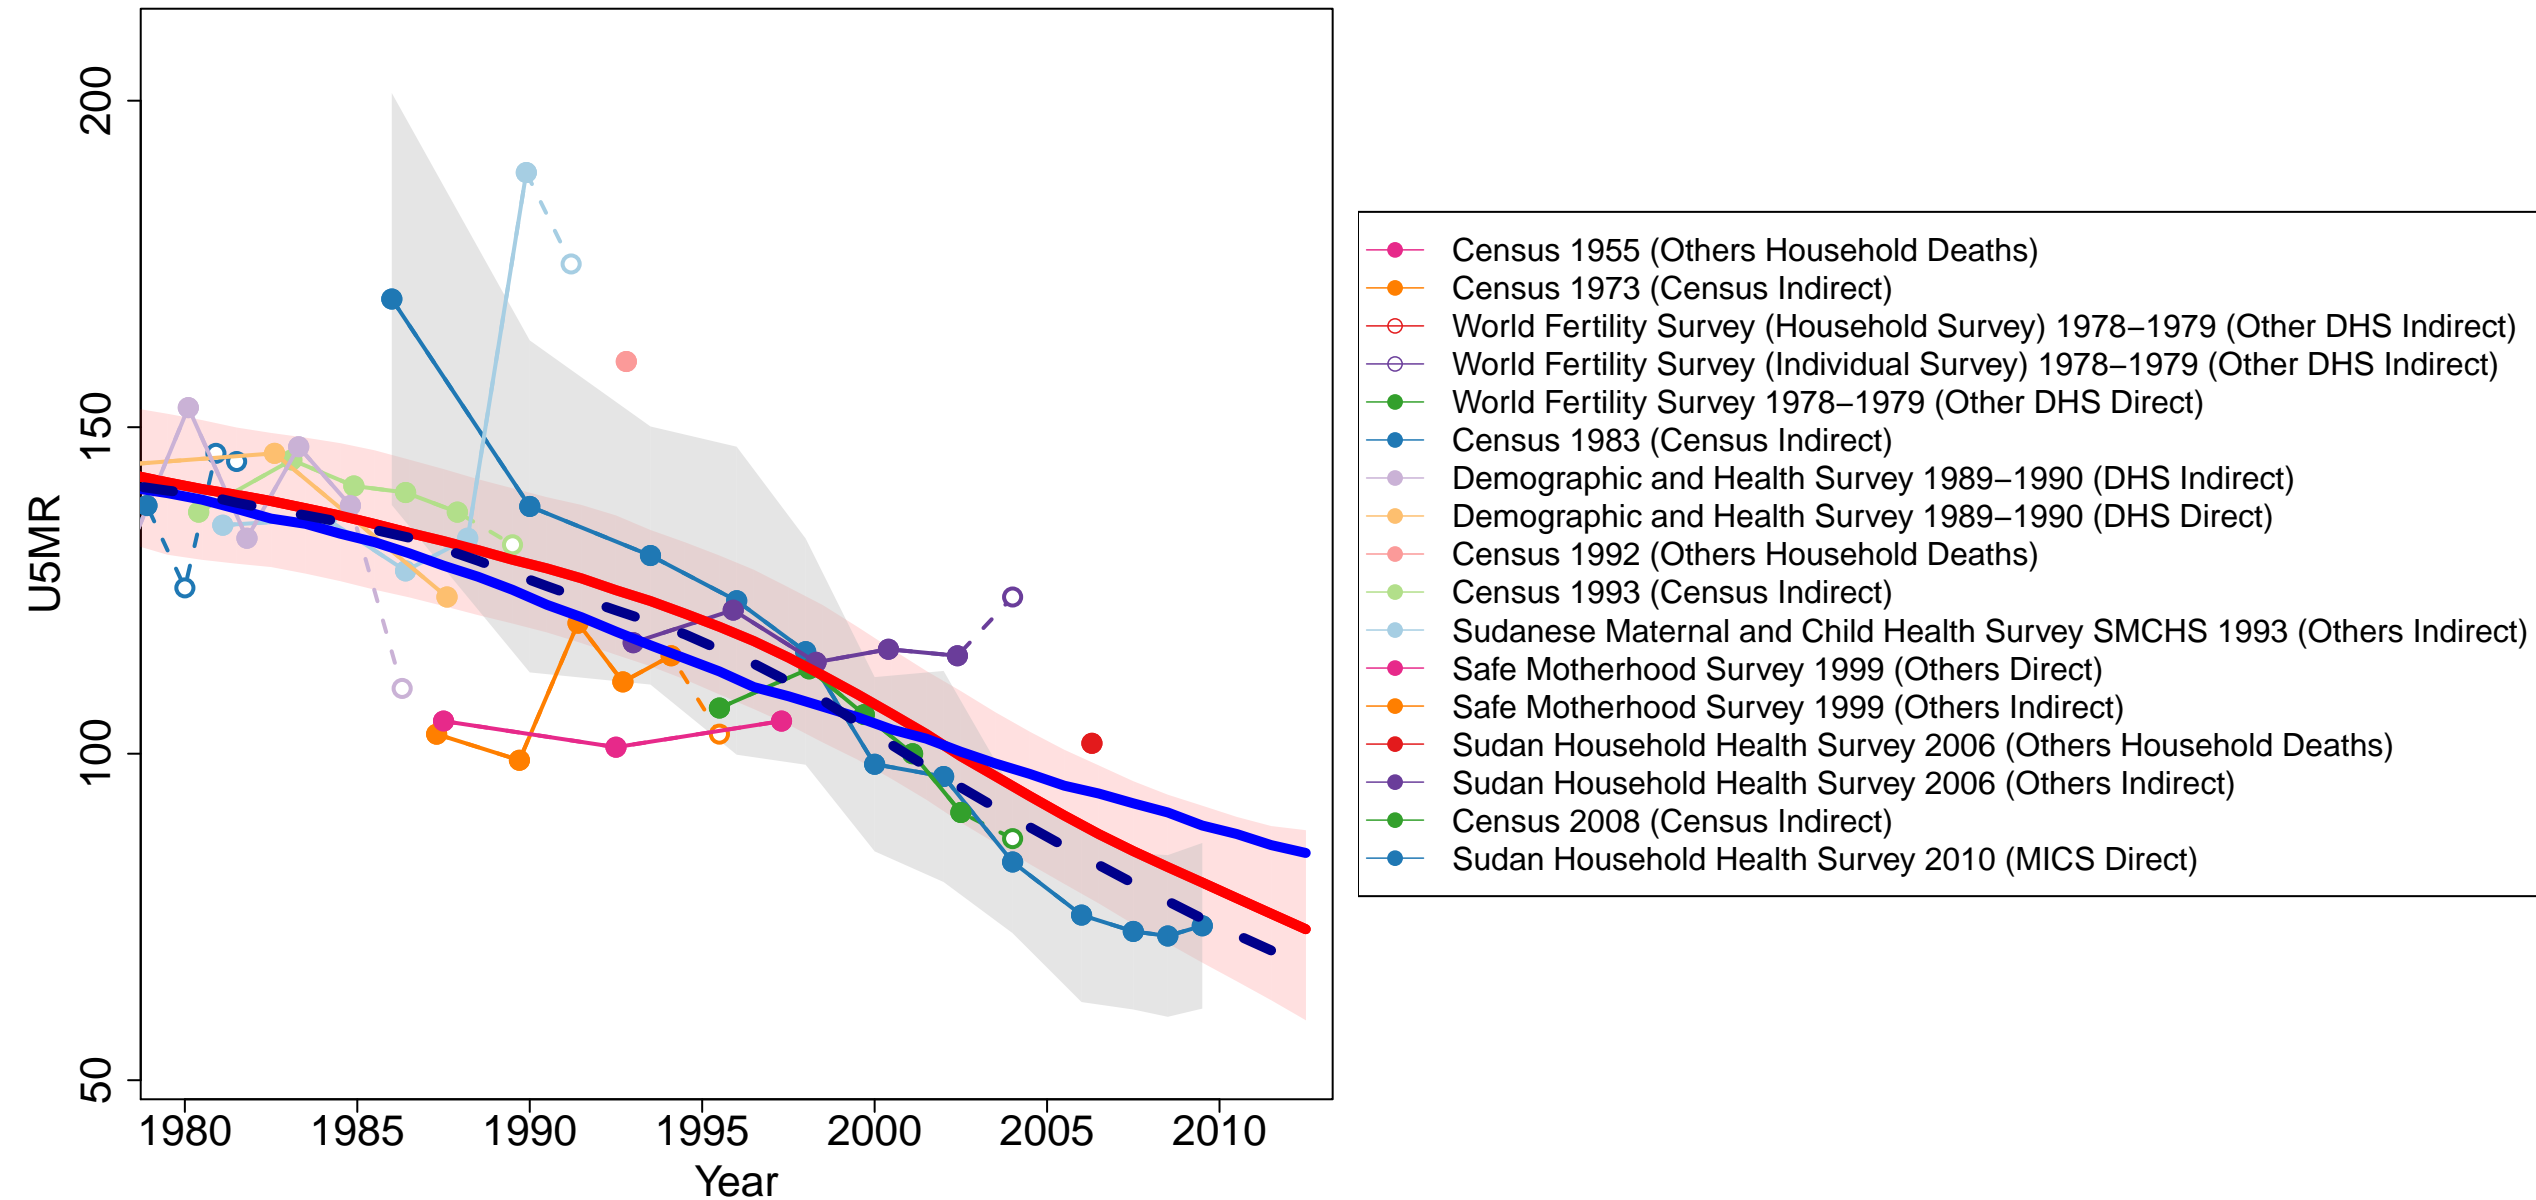

# South Sudan

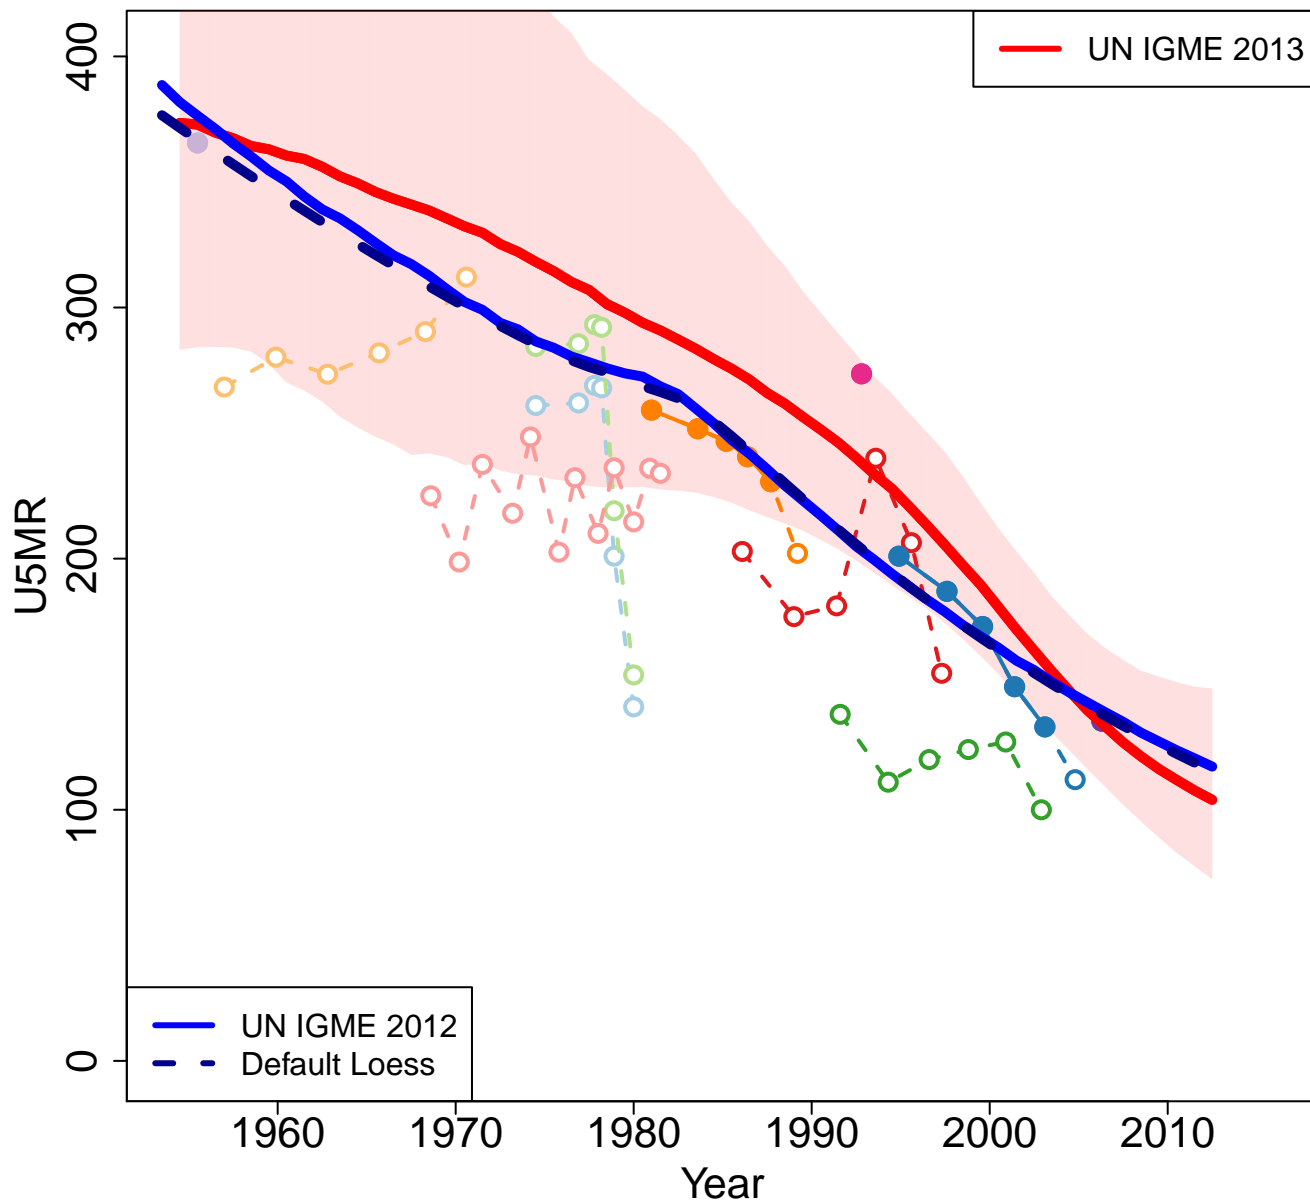

# Zoomed in

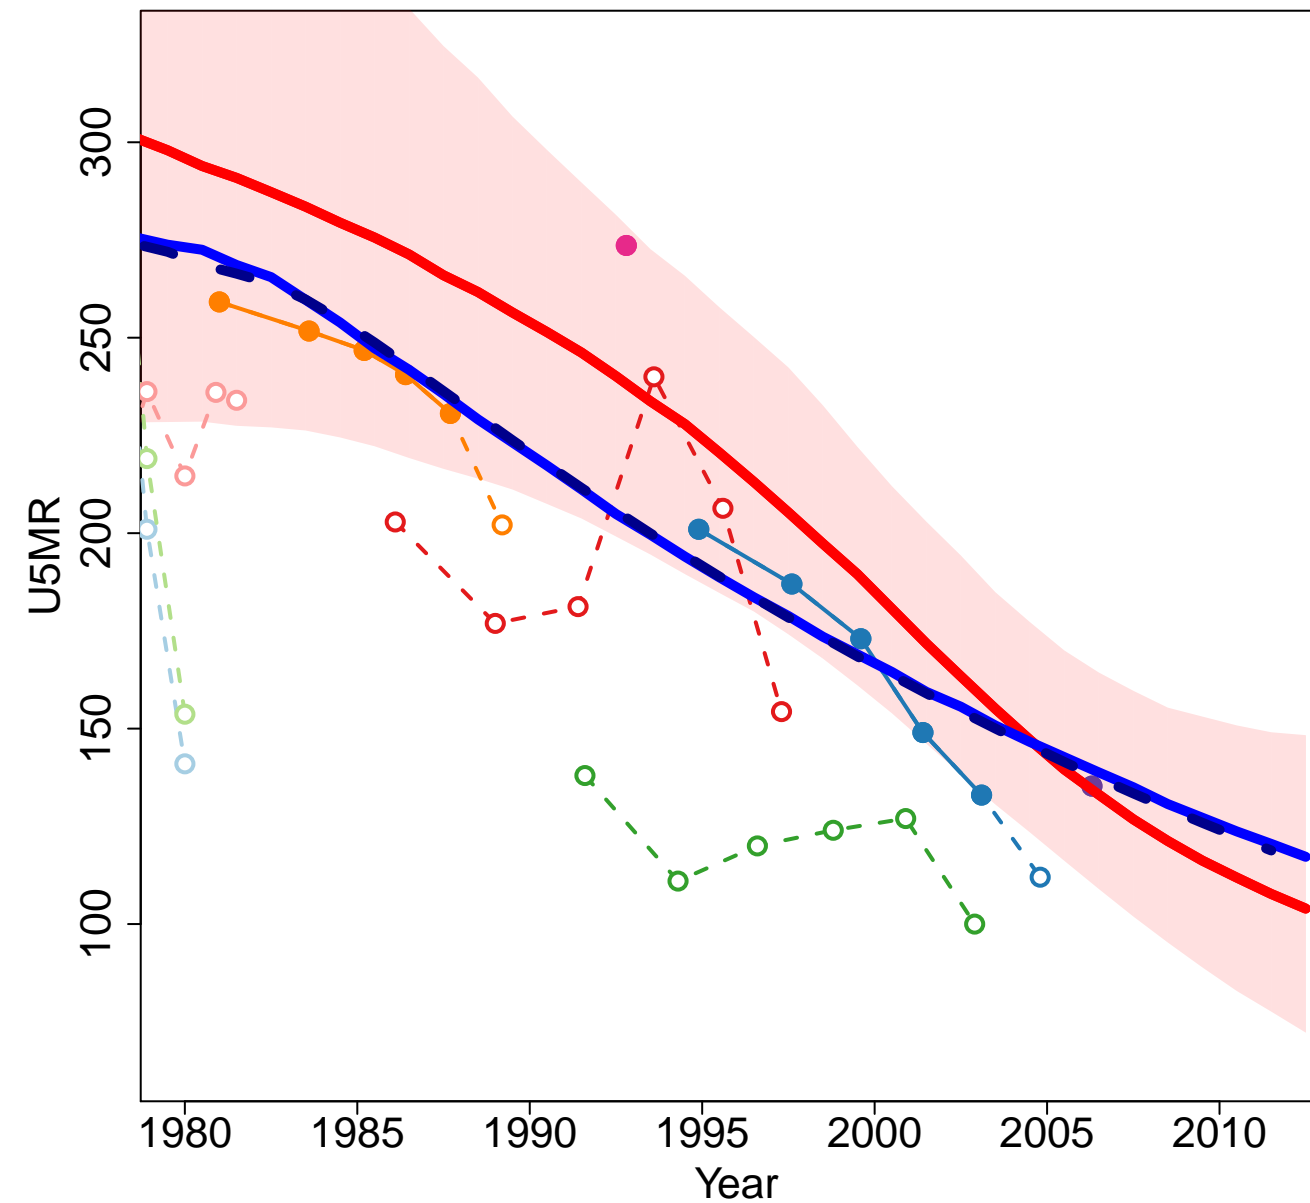

- Census 1955 (Others Household Deaths)
- Census 1973 (Census Indirect)
- Census 1983 (Census Indirect)
- UNICEF Survey 1985 (Others Indirect)
- UNICEF Survey (Urban) 1985 (Others Indirect)
- Census 1992 (Others Household Deaths)
- Census 1993 (Census Indirect)
- Demography of Forced Migration Project DFMP survey 1999 (Others Indirect)
- Sudan Household Health Survey 2006 (Others Household Deaths)
- Sudan Household Health Survey 2006 (Others Indirect)
- Census 2008 (Census Indirect)

# Suriname

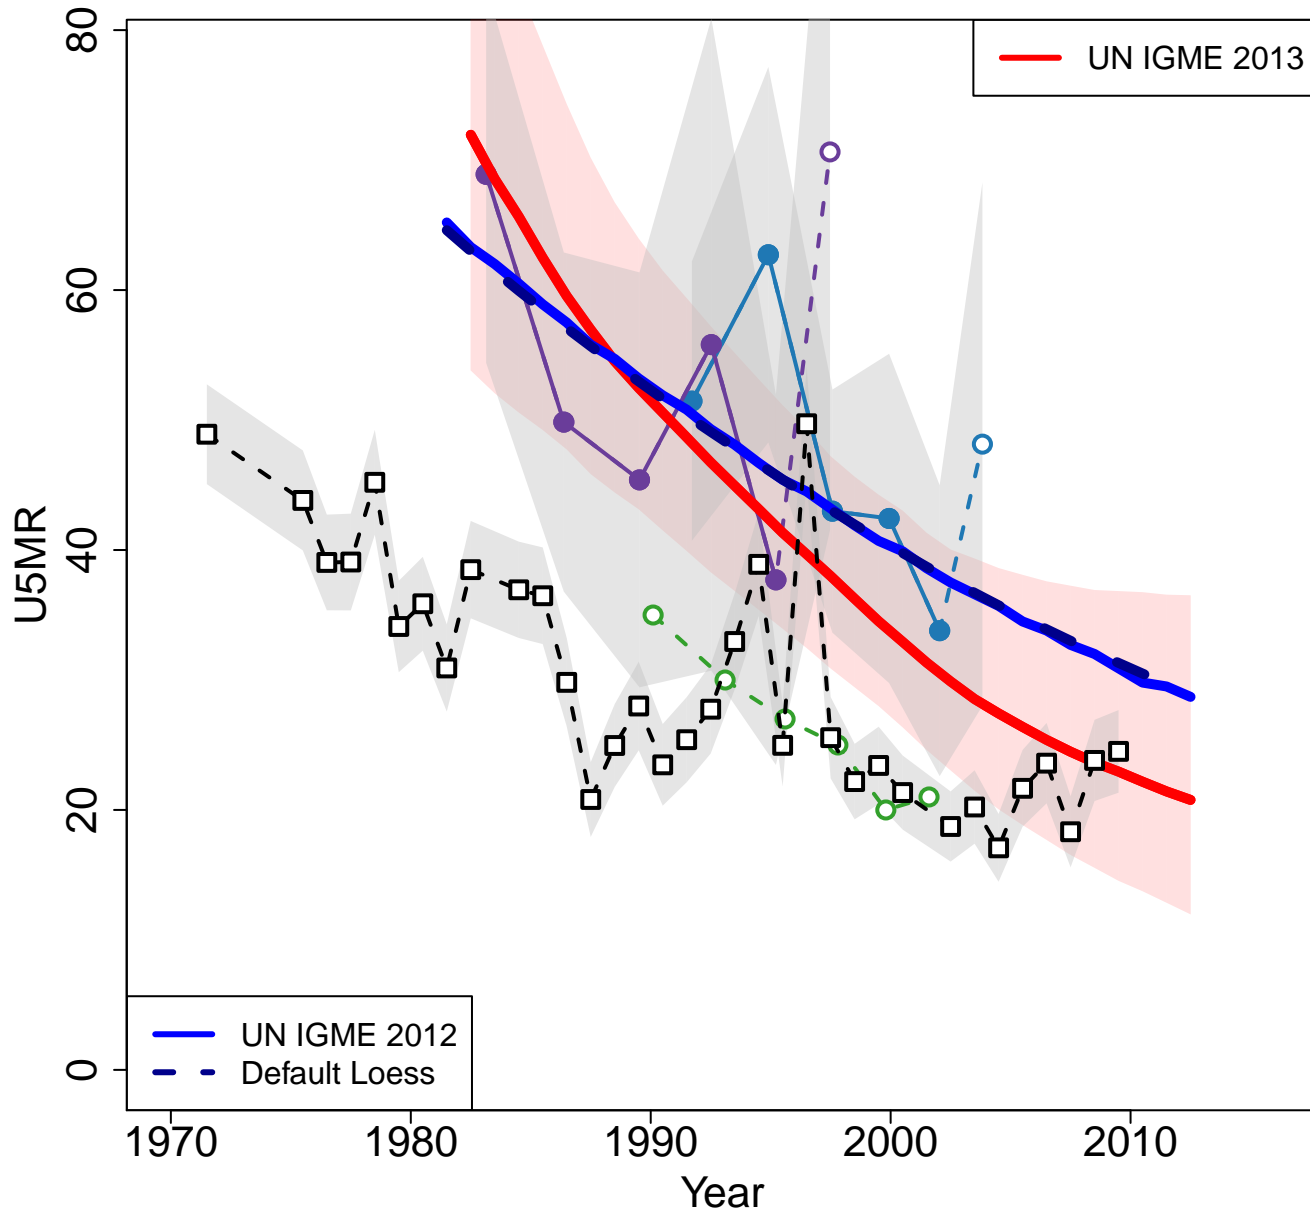

# Zoomed in

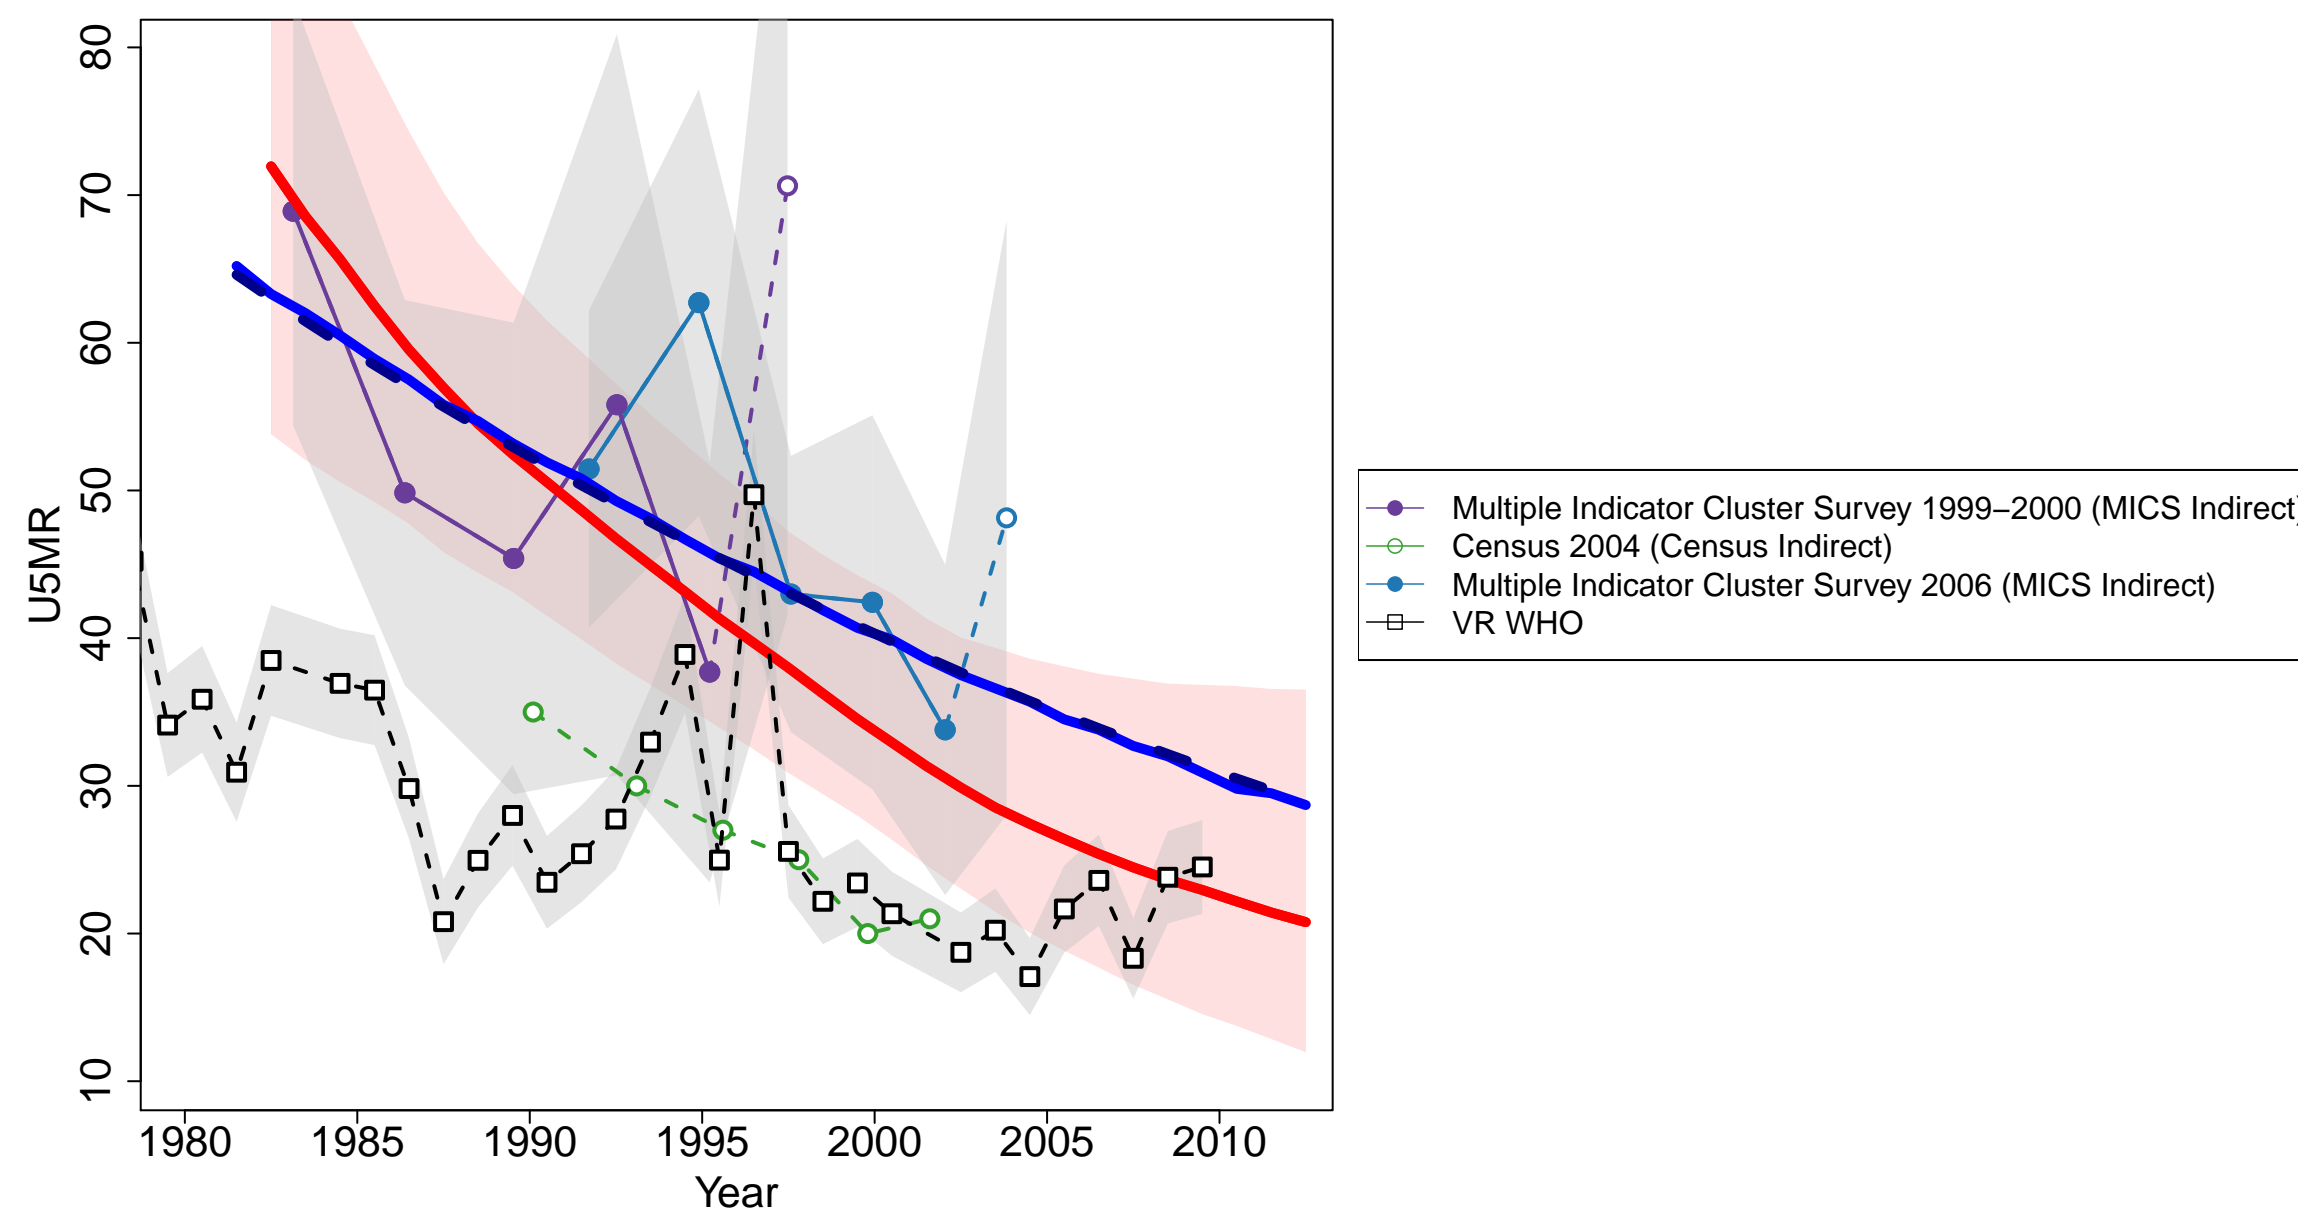

# Syria

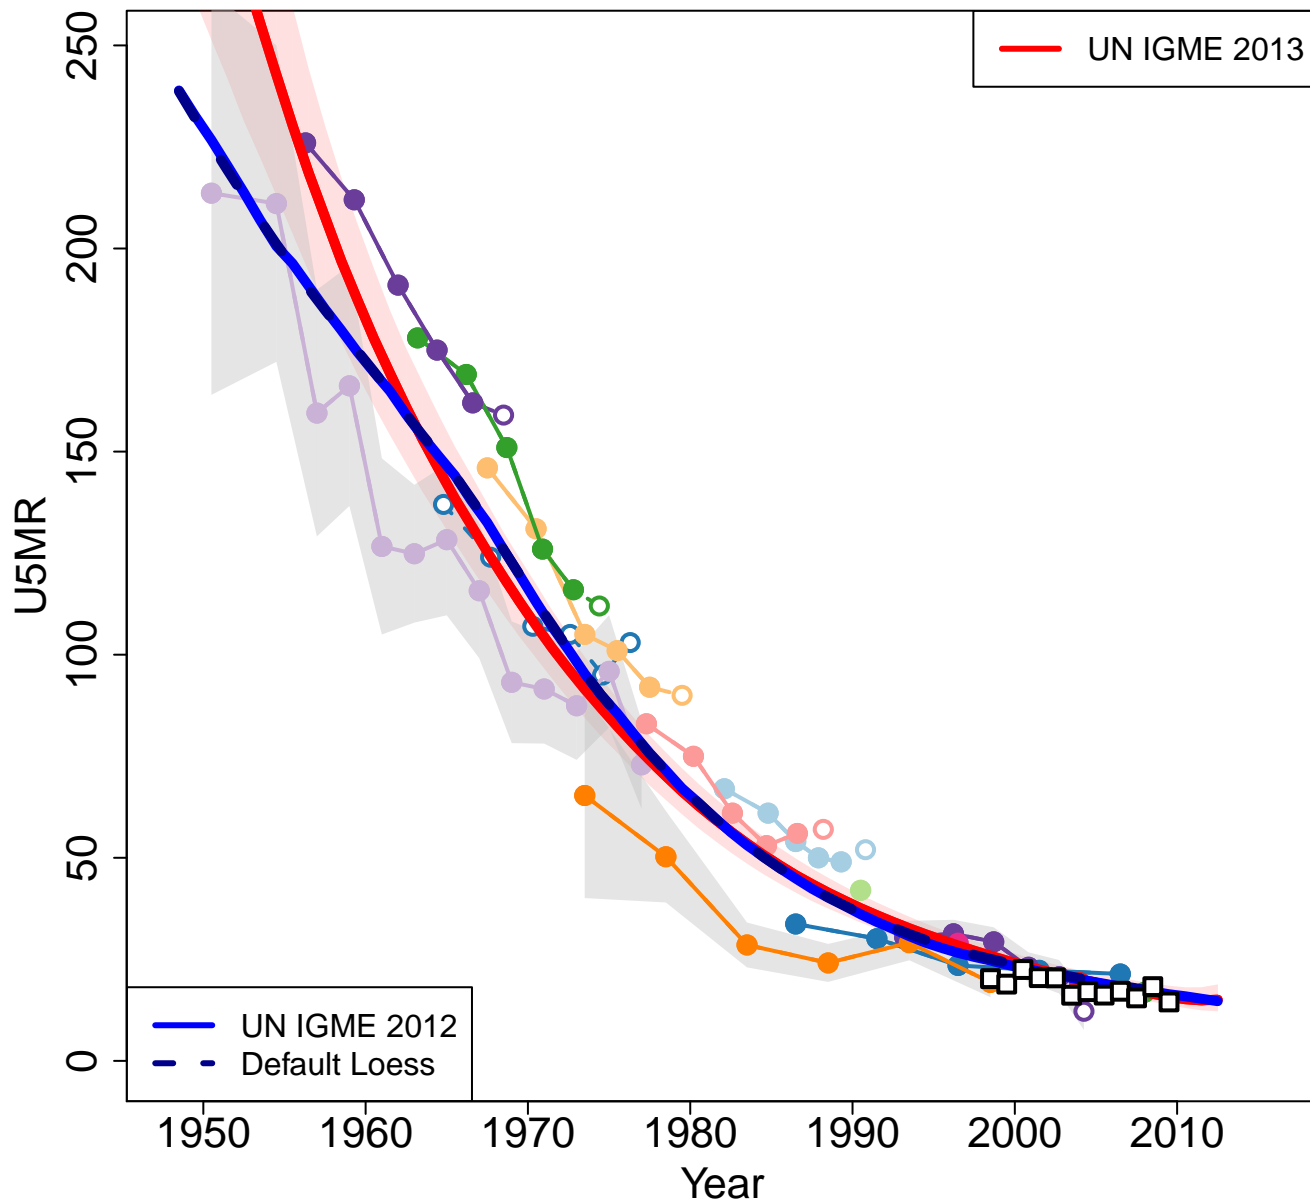

# Zoomed in

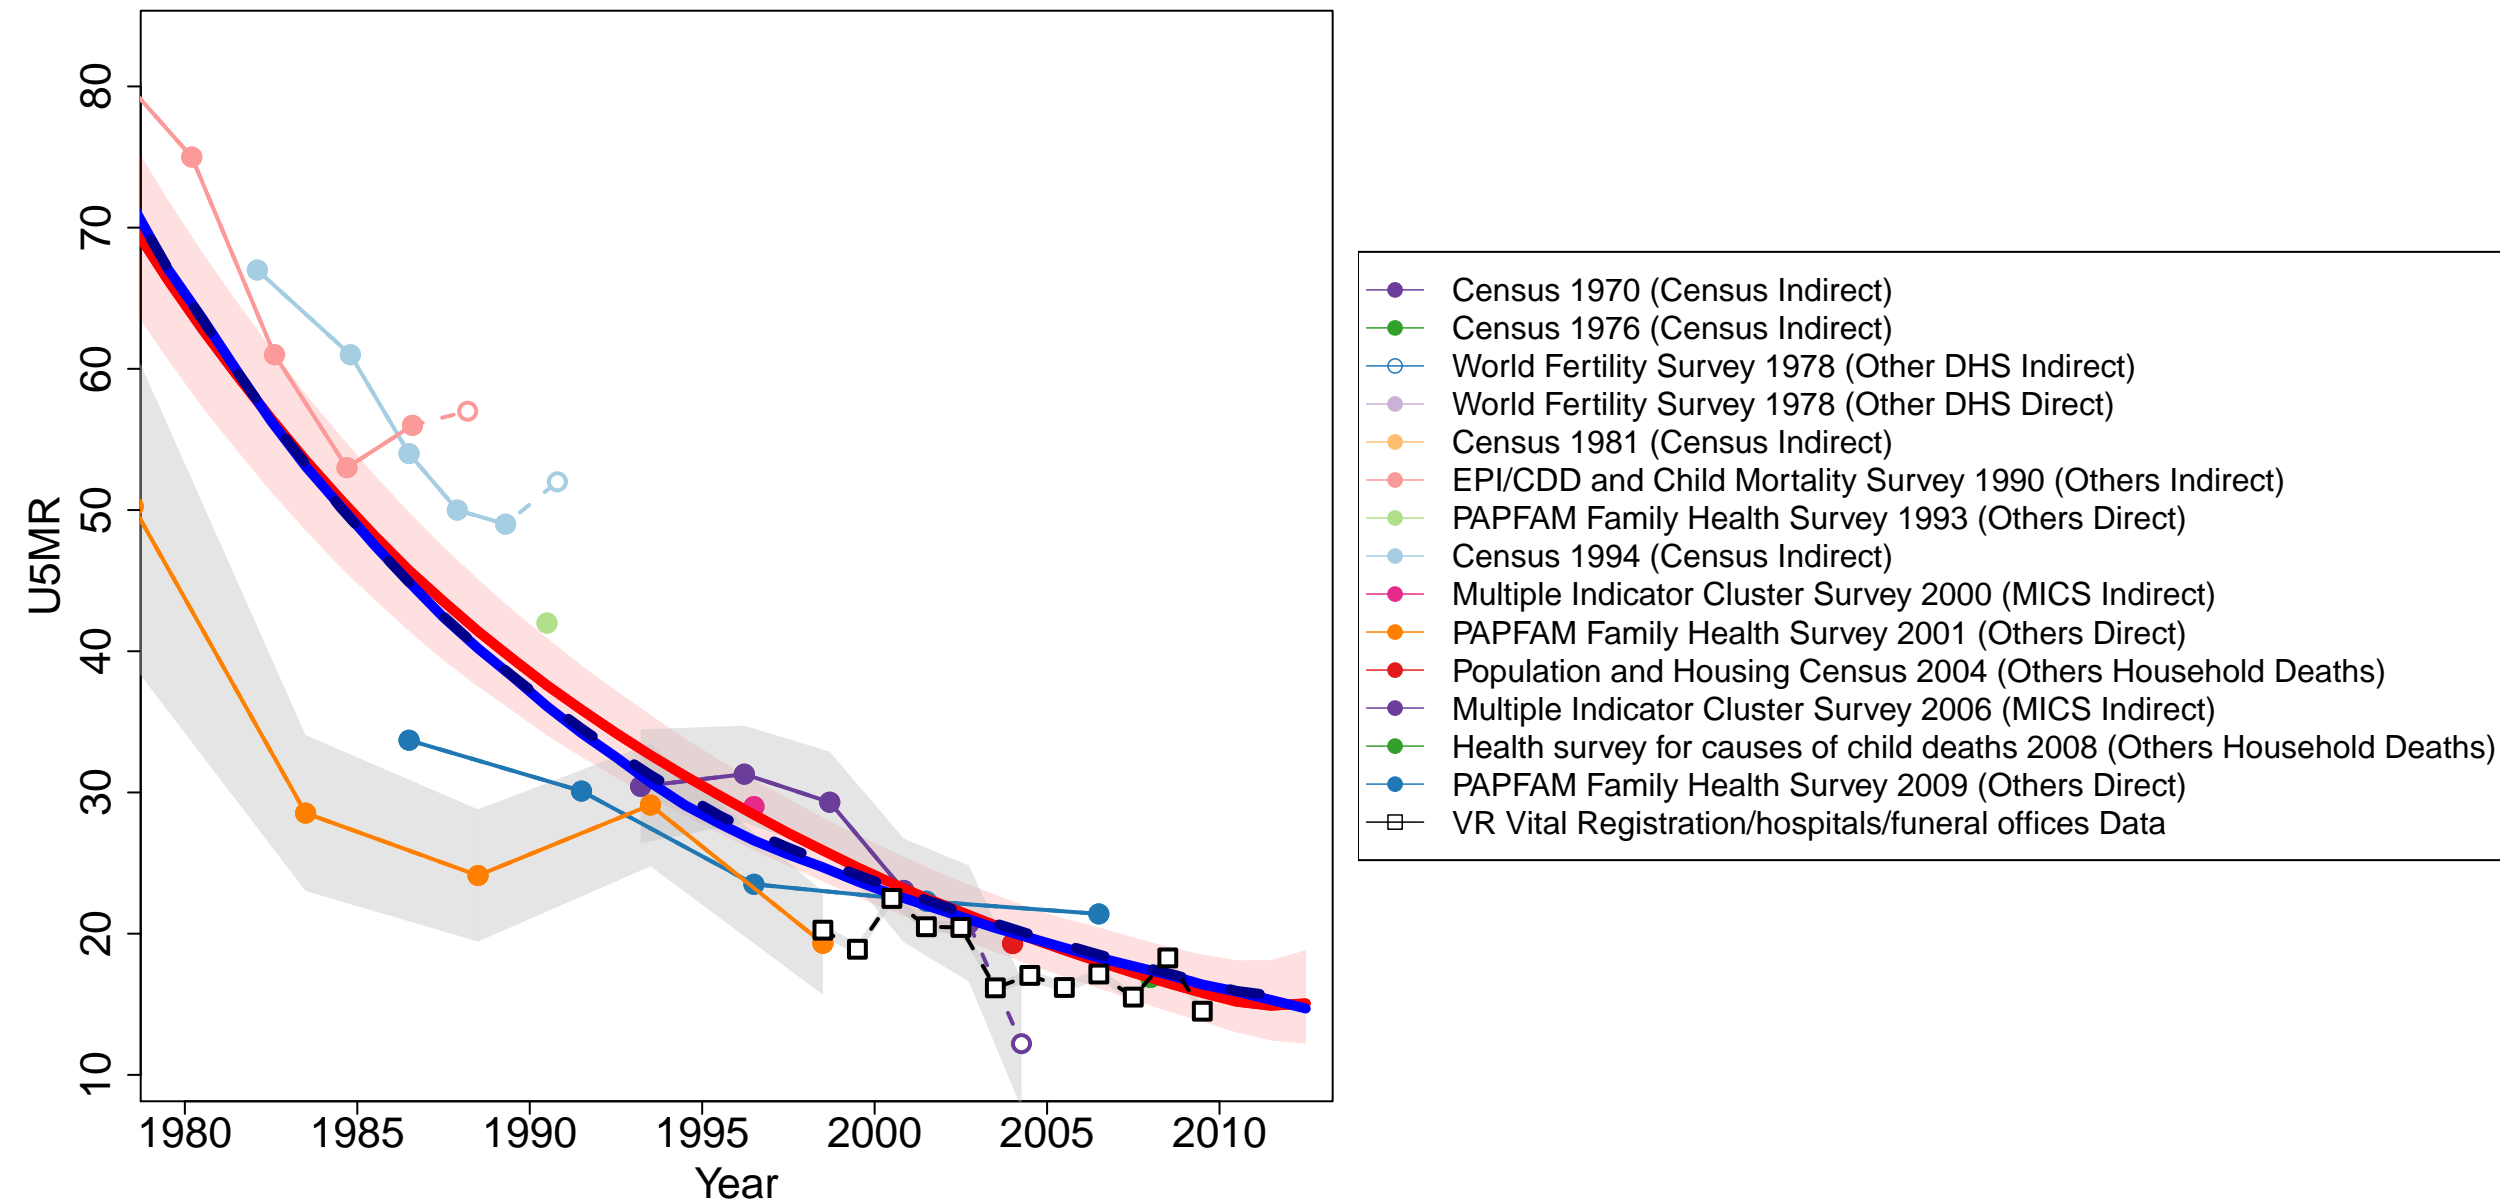

# Tajikistan

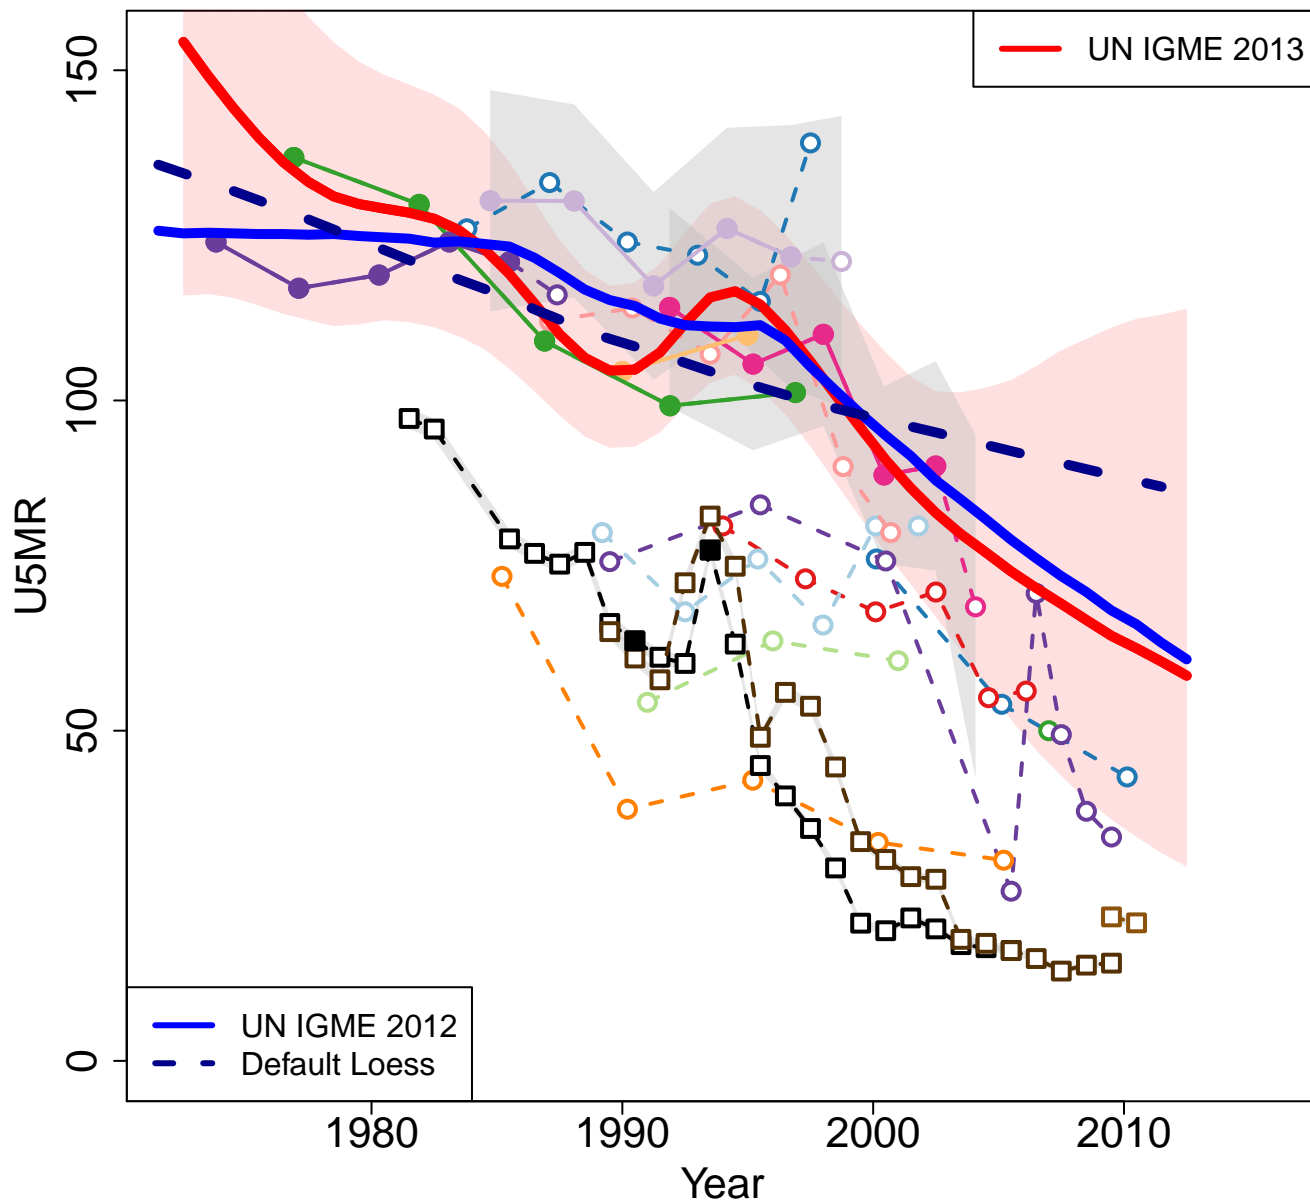

# Zoomed in

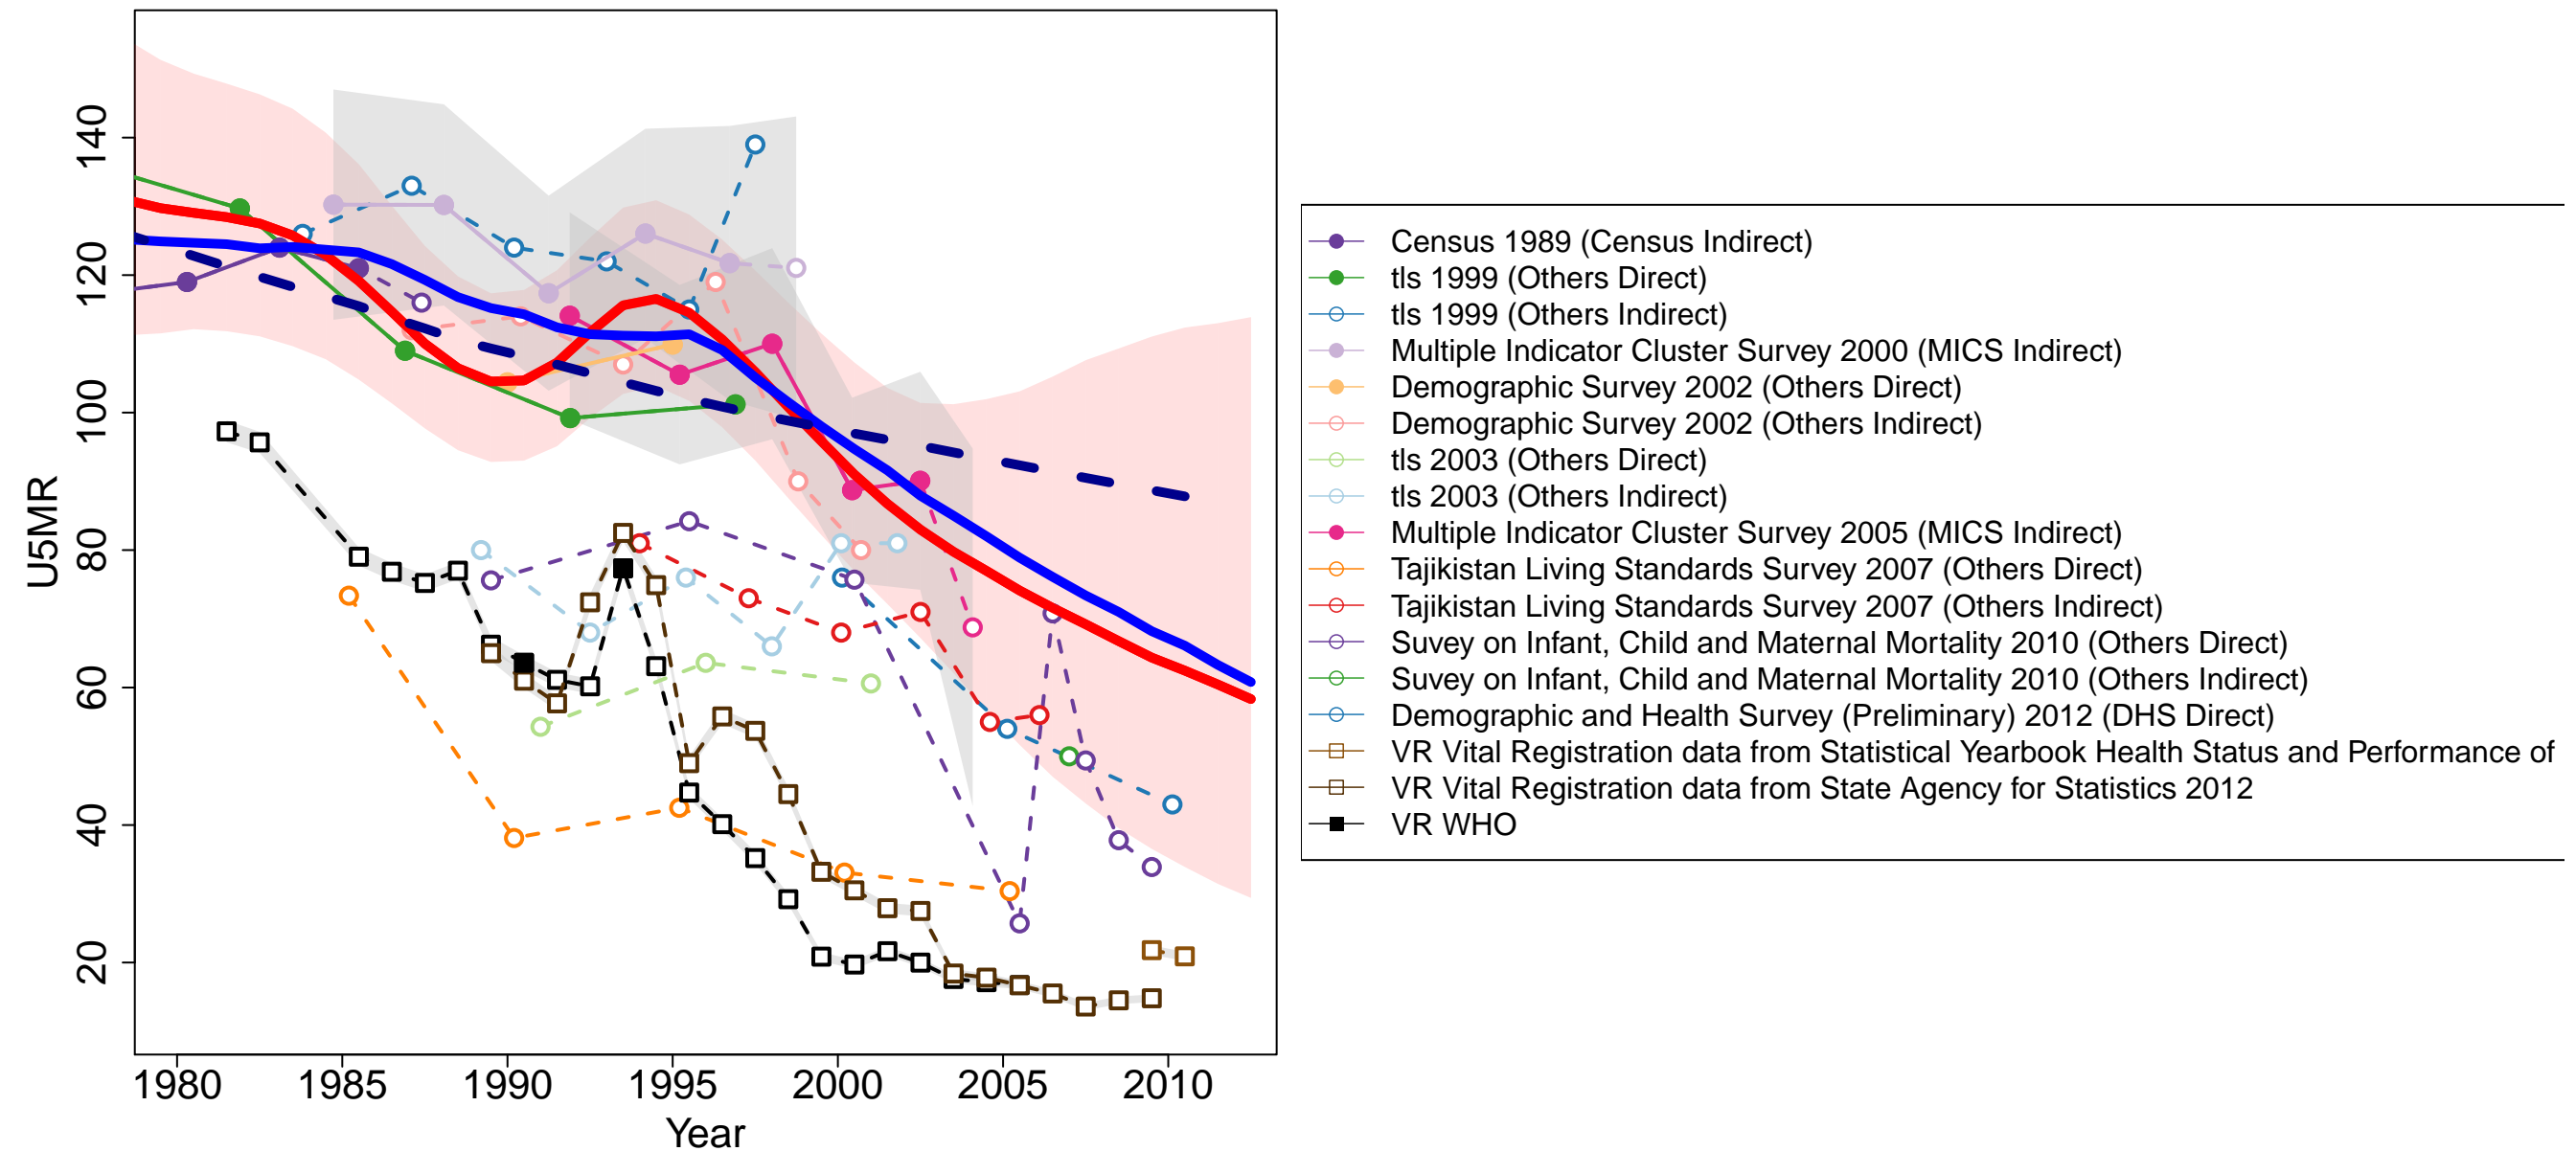

# Macedonia

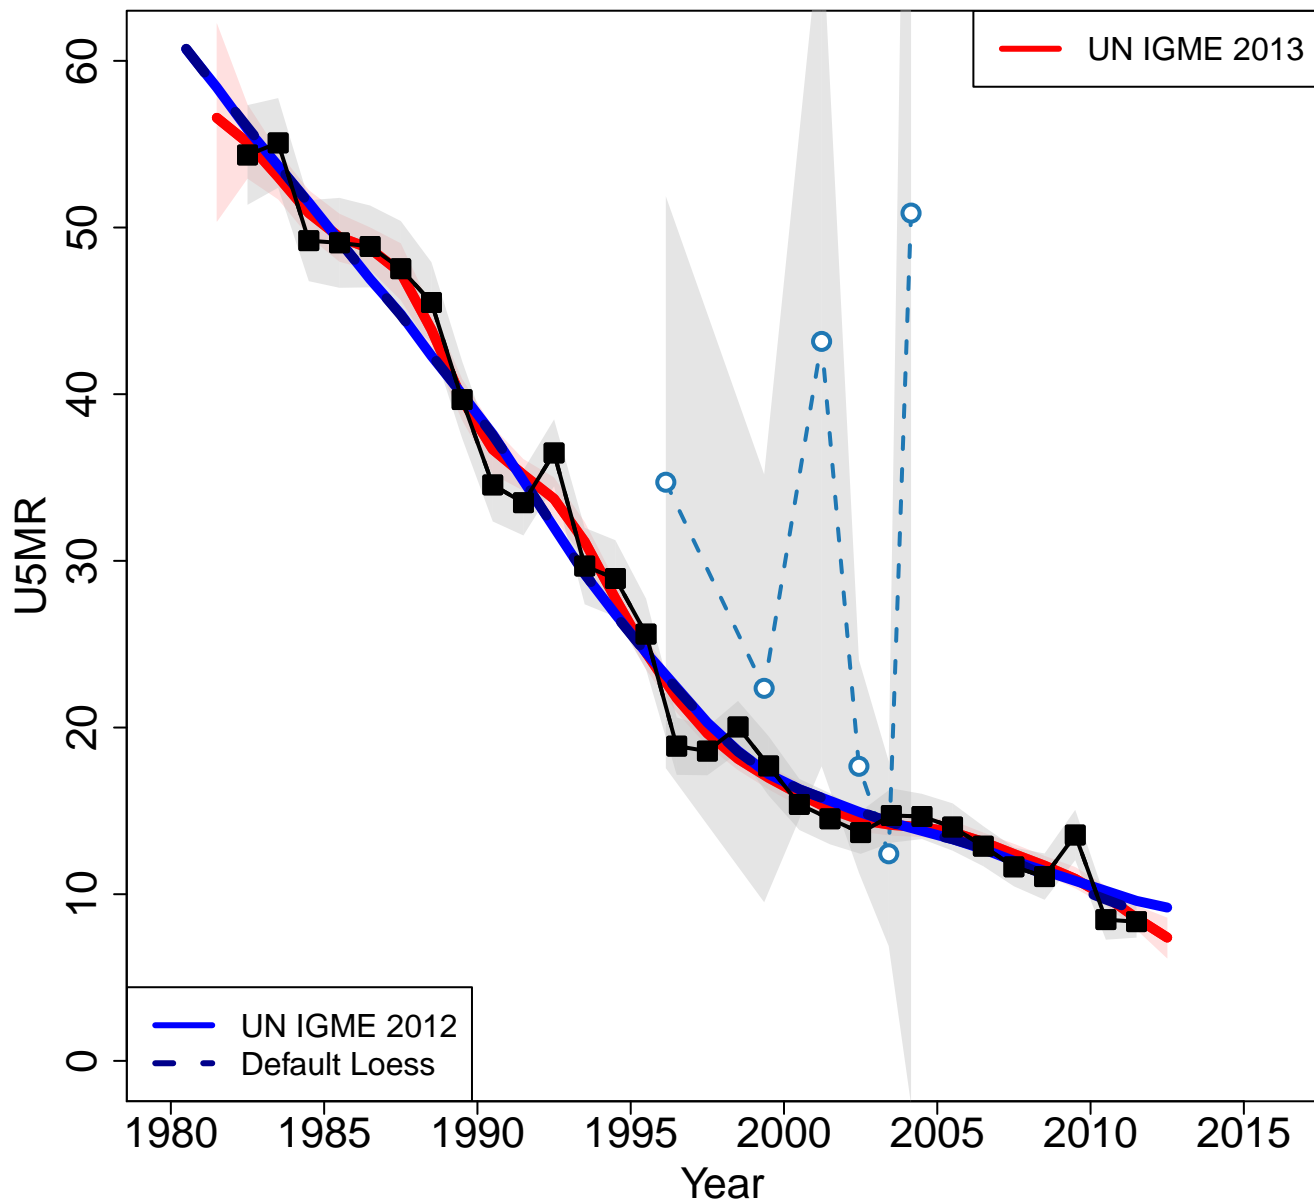

# Zoomed in

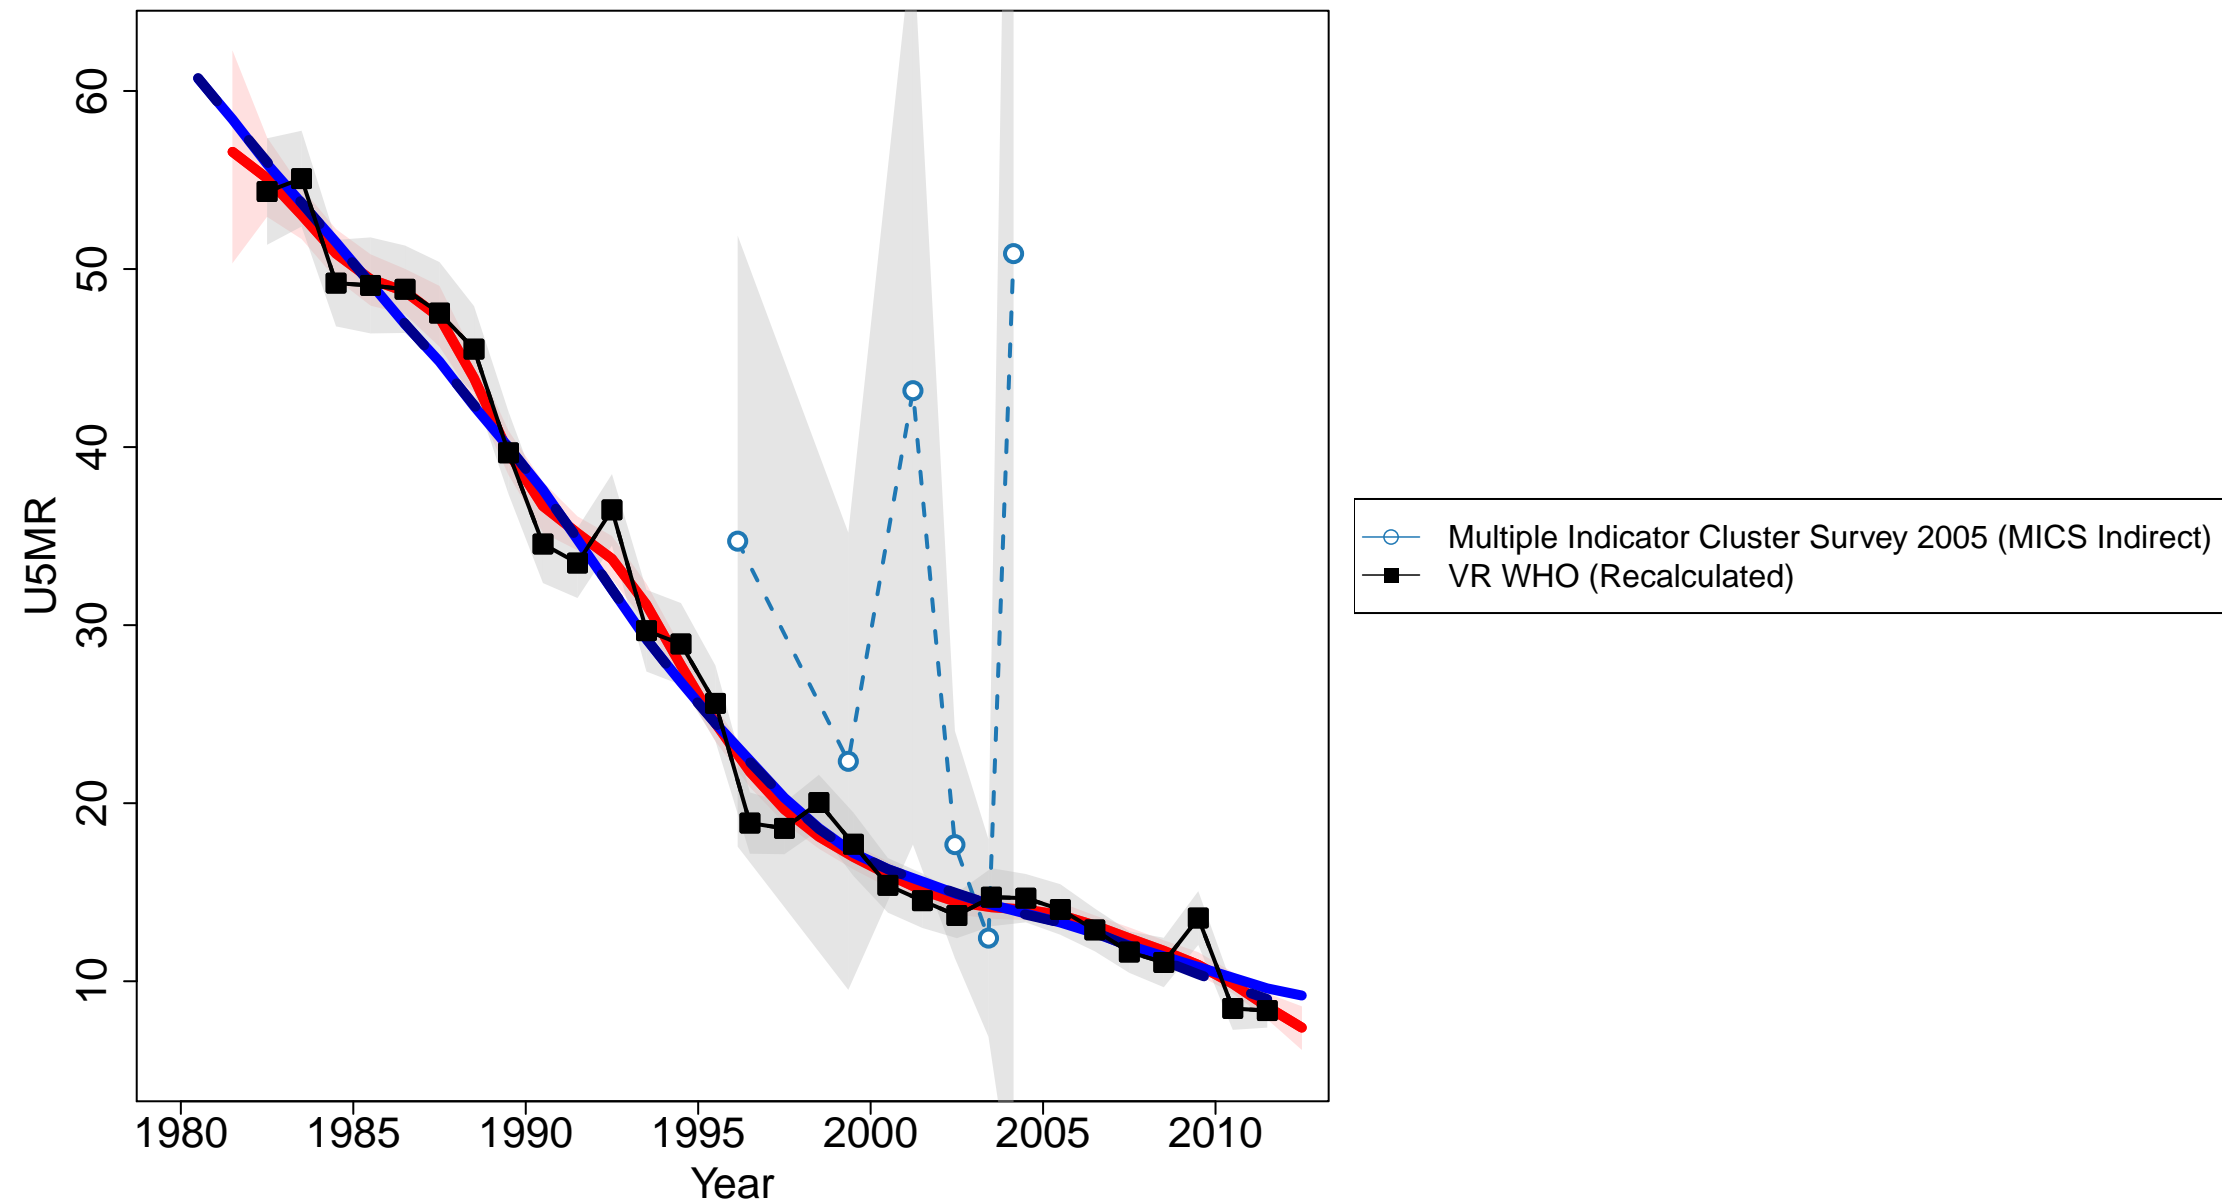



# Thailand

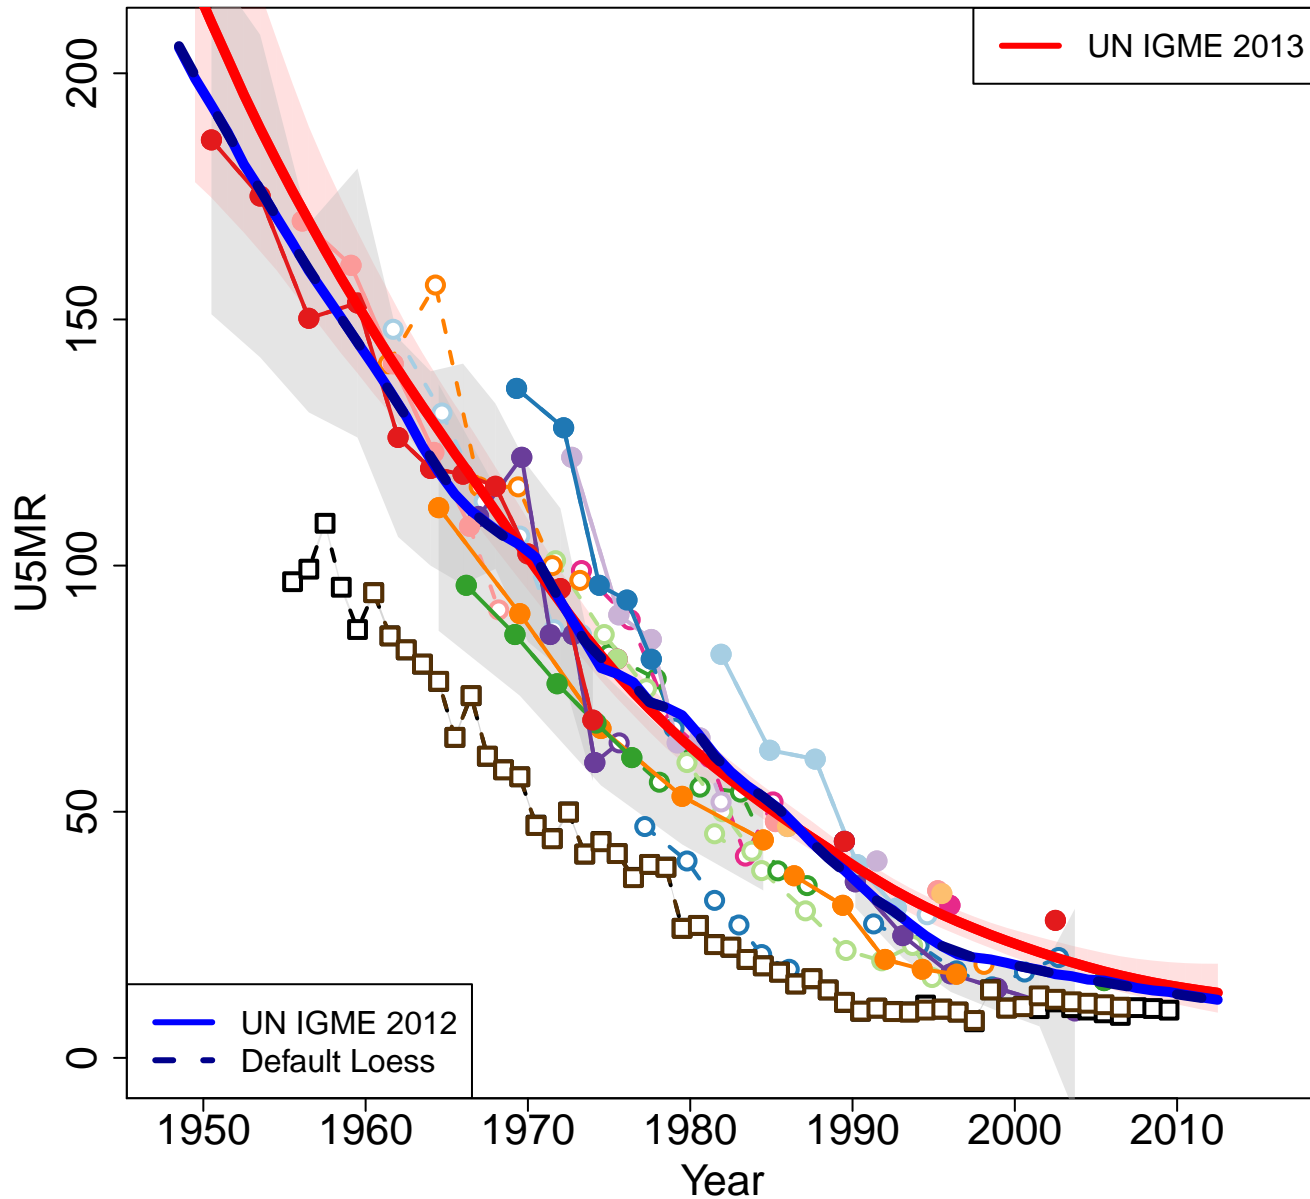

# Zoomed in

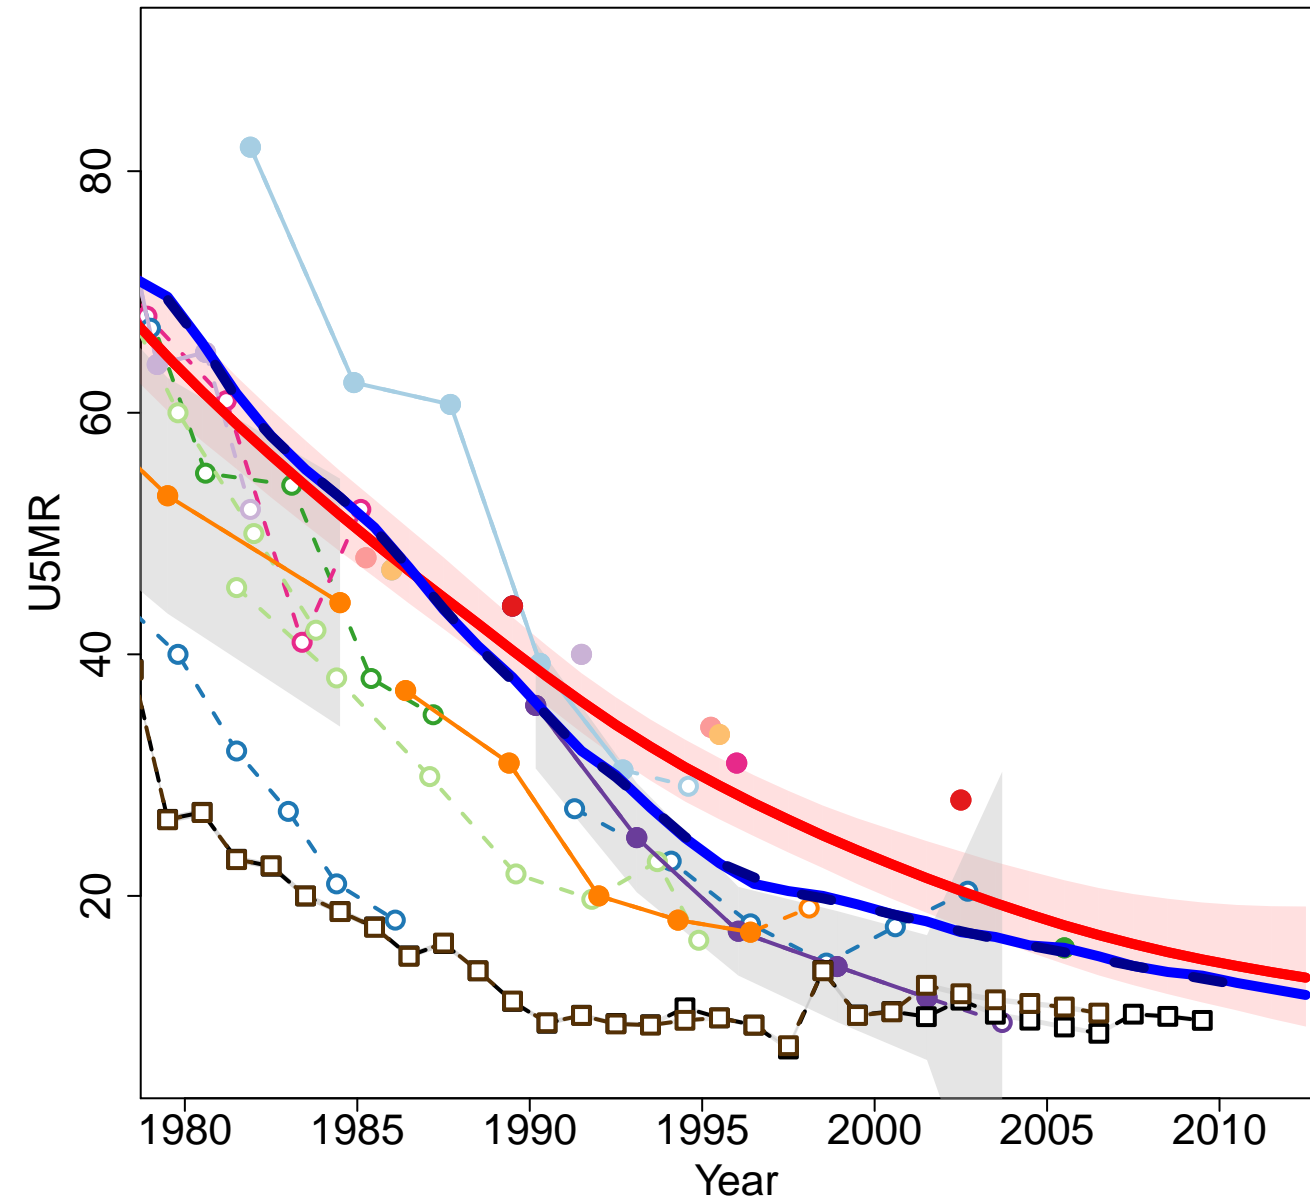

- Census 1970 (Census Indirect)
- Survey of Population Change 1974–1975 (Others Direct)
- Survey of Population Change 1974–1975 (Others Indirect)
- National Life Tables 1975 (Others Life Table)
- World Fertility Survey 1975 (Other DHS Indirect)
- World Fertility Survey 1975 (Other DHS Direct)
- National Fertility Survey 1979 (Others Indirect)
- Census 1980 (Census Indirect)
- Contraceptive Prevalence Survey 1981 (Others Indirect)
- Contraceptive Prevalence Survey 1984 (Others Indirect)
- Survey of Population Change 1985–1986 (Others Direct)
- Life Table by Hill 1980–1990 Intercensal Death 1985 (Others Life Table)
- Survey of Population Change 1985–1986 (Others Indirect)
- National Life Tables 1986 (Others Life Table)
- Demographic and Health Survey 1987 (DHS Indirect)
- Demographic and Health Survey 1987 (DHS Direct)
- Survey of Population Change 1989 (Others Direct)
- National Life Tables 1989 (Others Life Table)
- Survey of Population Change 1989 (Others Indirect)
- Census 1990 (Census Indirect)
- National Life Tables 1991 (Others Life Table)
- Survey of Population Change 1995 (Others Direct)
- Life Table by Hill 1990–2000 Intercensal Death 1995 (Others Life Table)
- Survey of Population Change 1995 (Others Indirect)
- Contraceptive Prevalence Survey 1996 (Others Indirect)
- National Life Tables 1996 (Others Life Table)
- Census 2000 (Census Indirect)
- Life Table in 2002 by Hill 2002 (Others Life Table)
- Multiple Indicator Cluster Survey 2005–2006 (MICS Indirect)
- Survey of Population Change 2005–2006 (Others Direct)
- Survey of Population Change 2005–2006 (Others Indirect)
- VR Vital Registration
- VR WHO

# Timor Leste

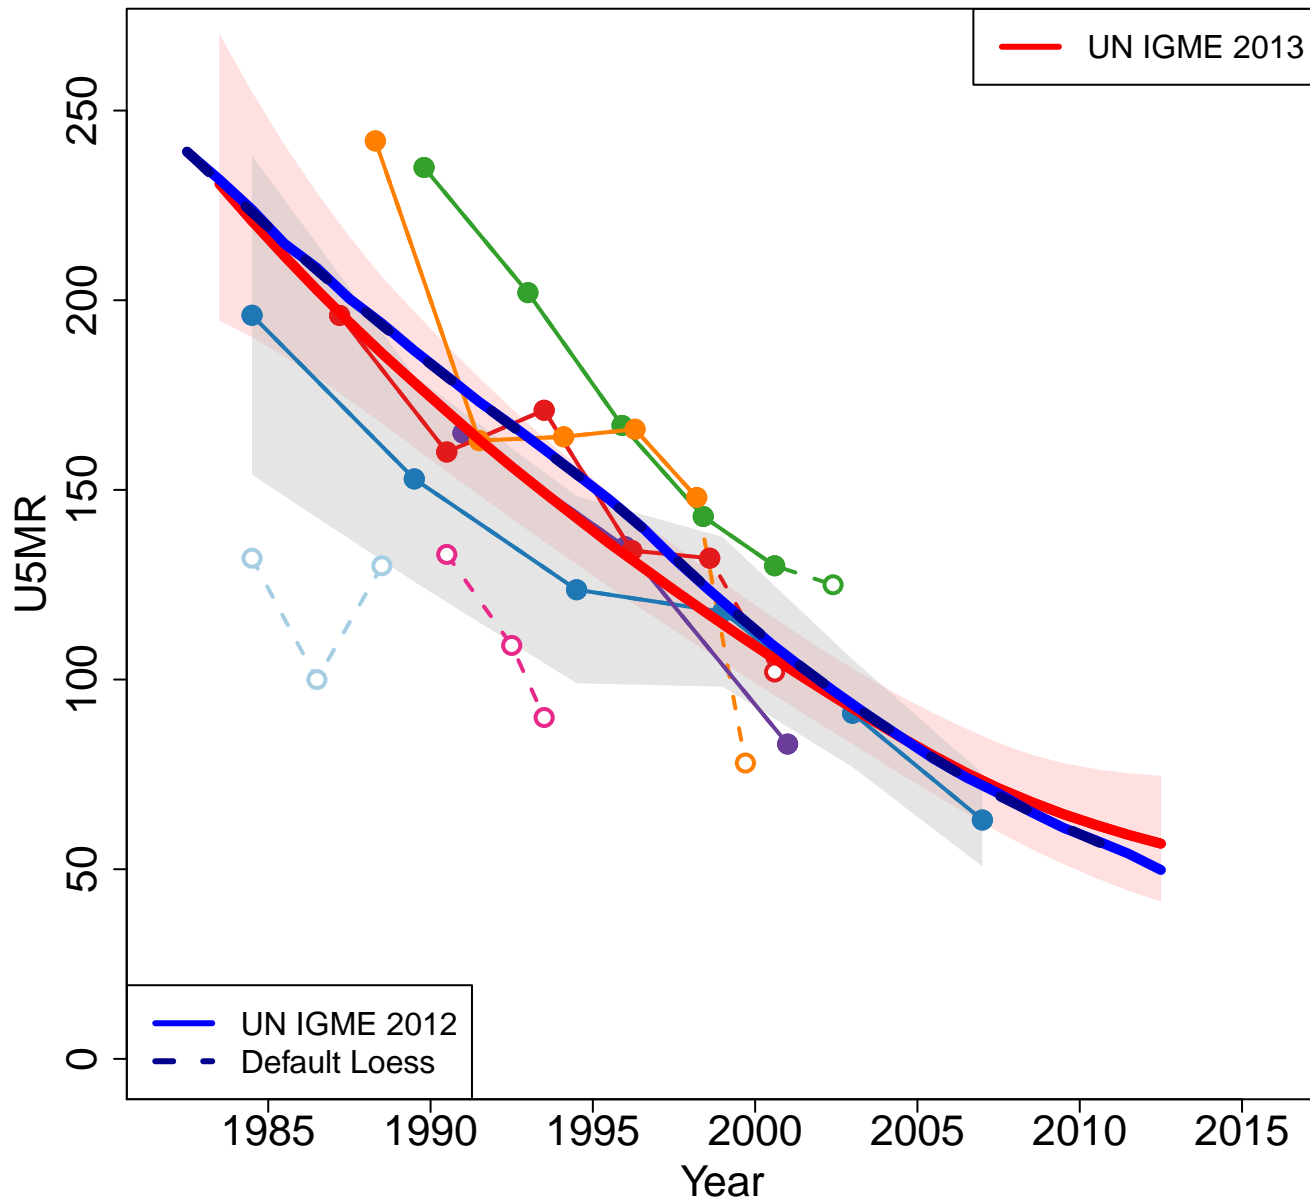

# Zoomed in

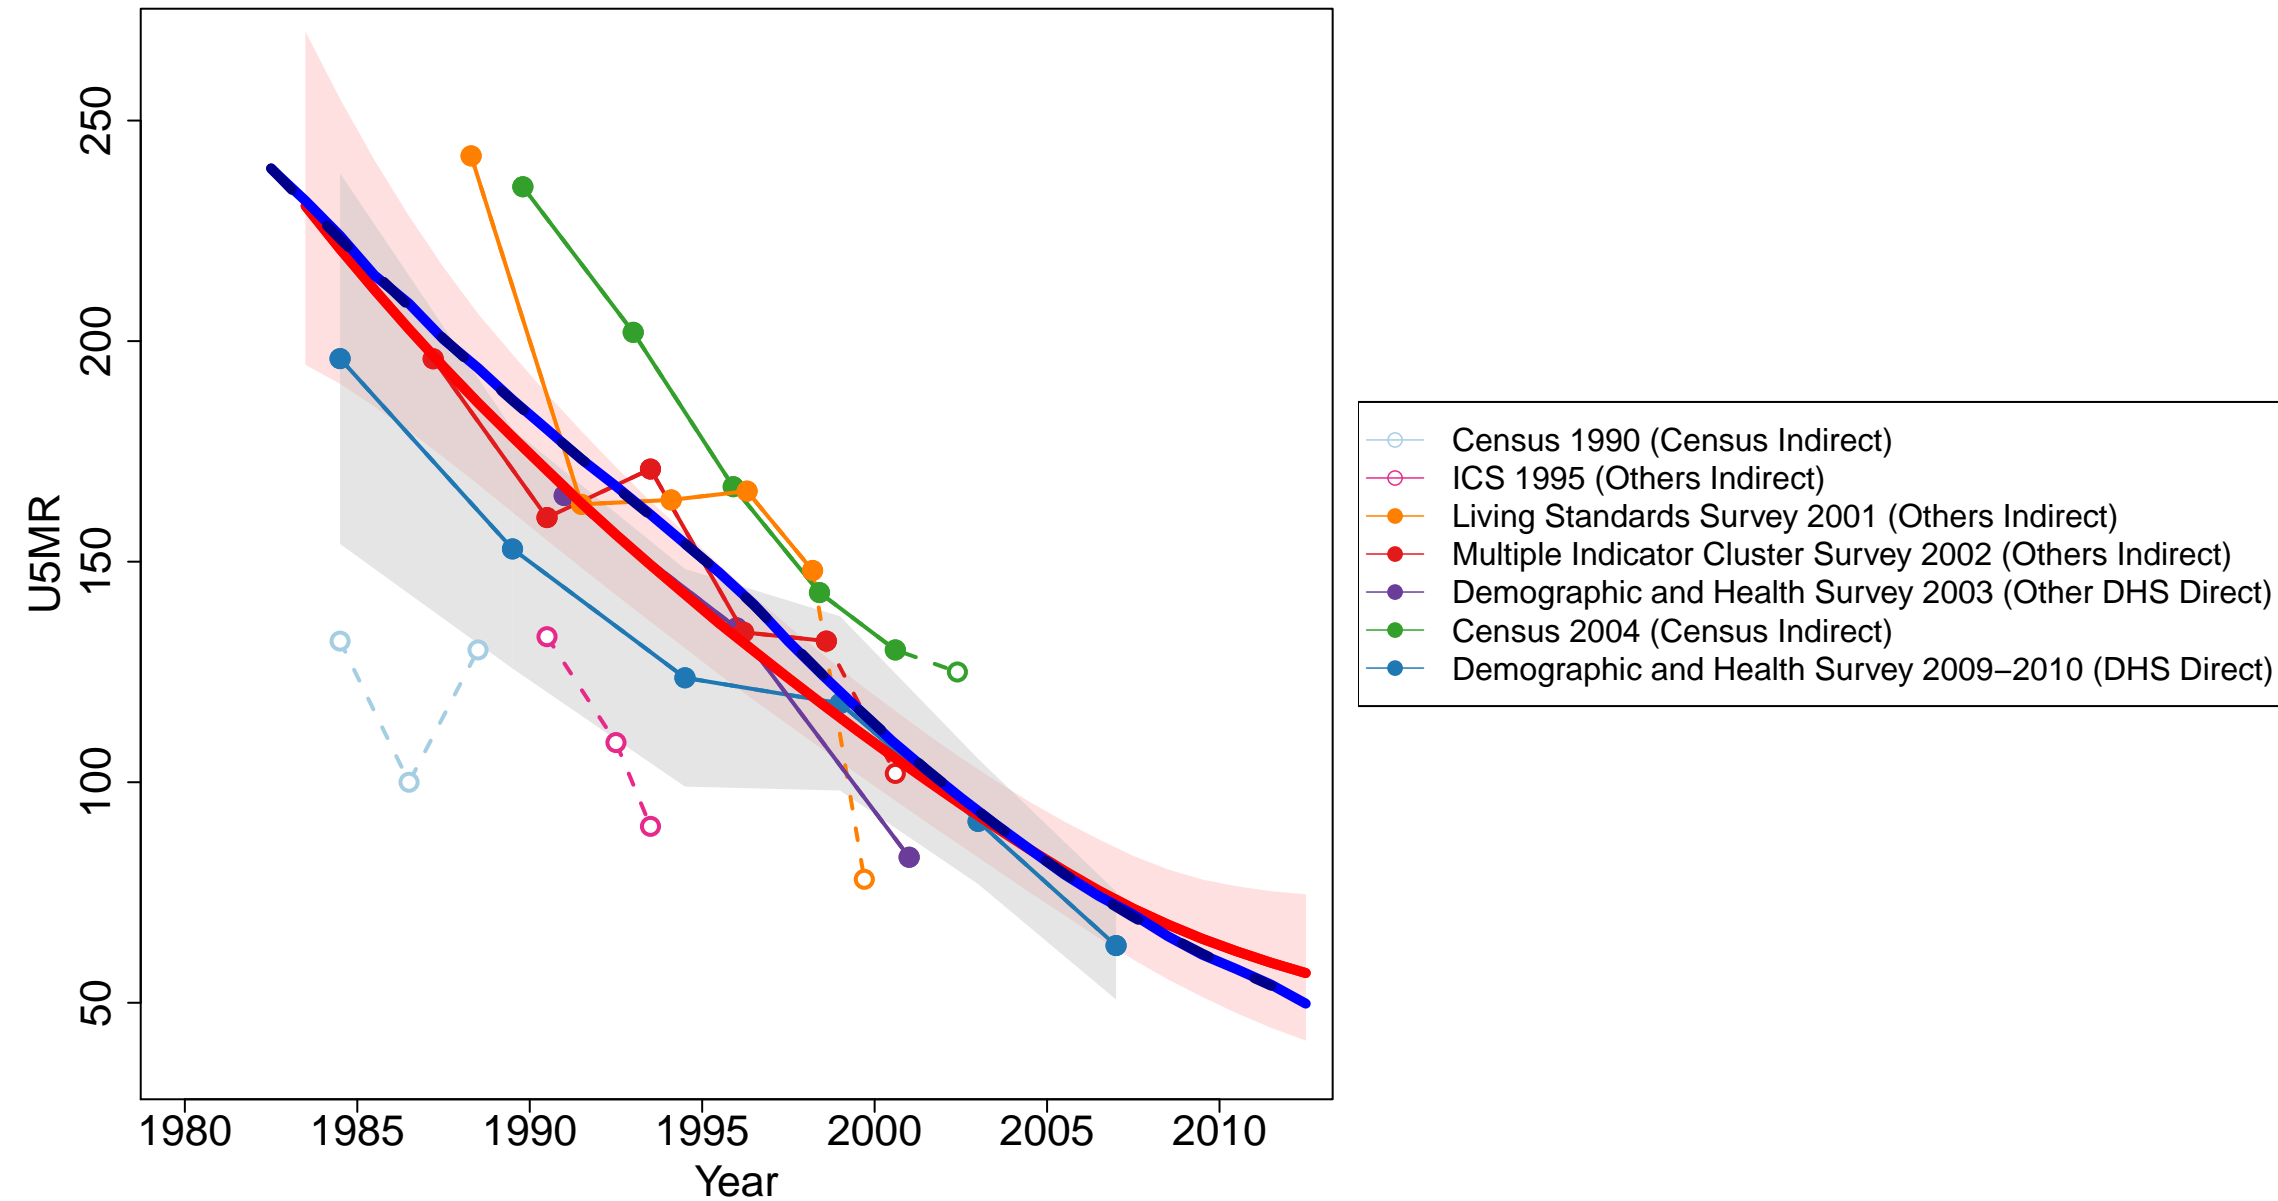

# Togo

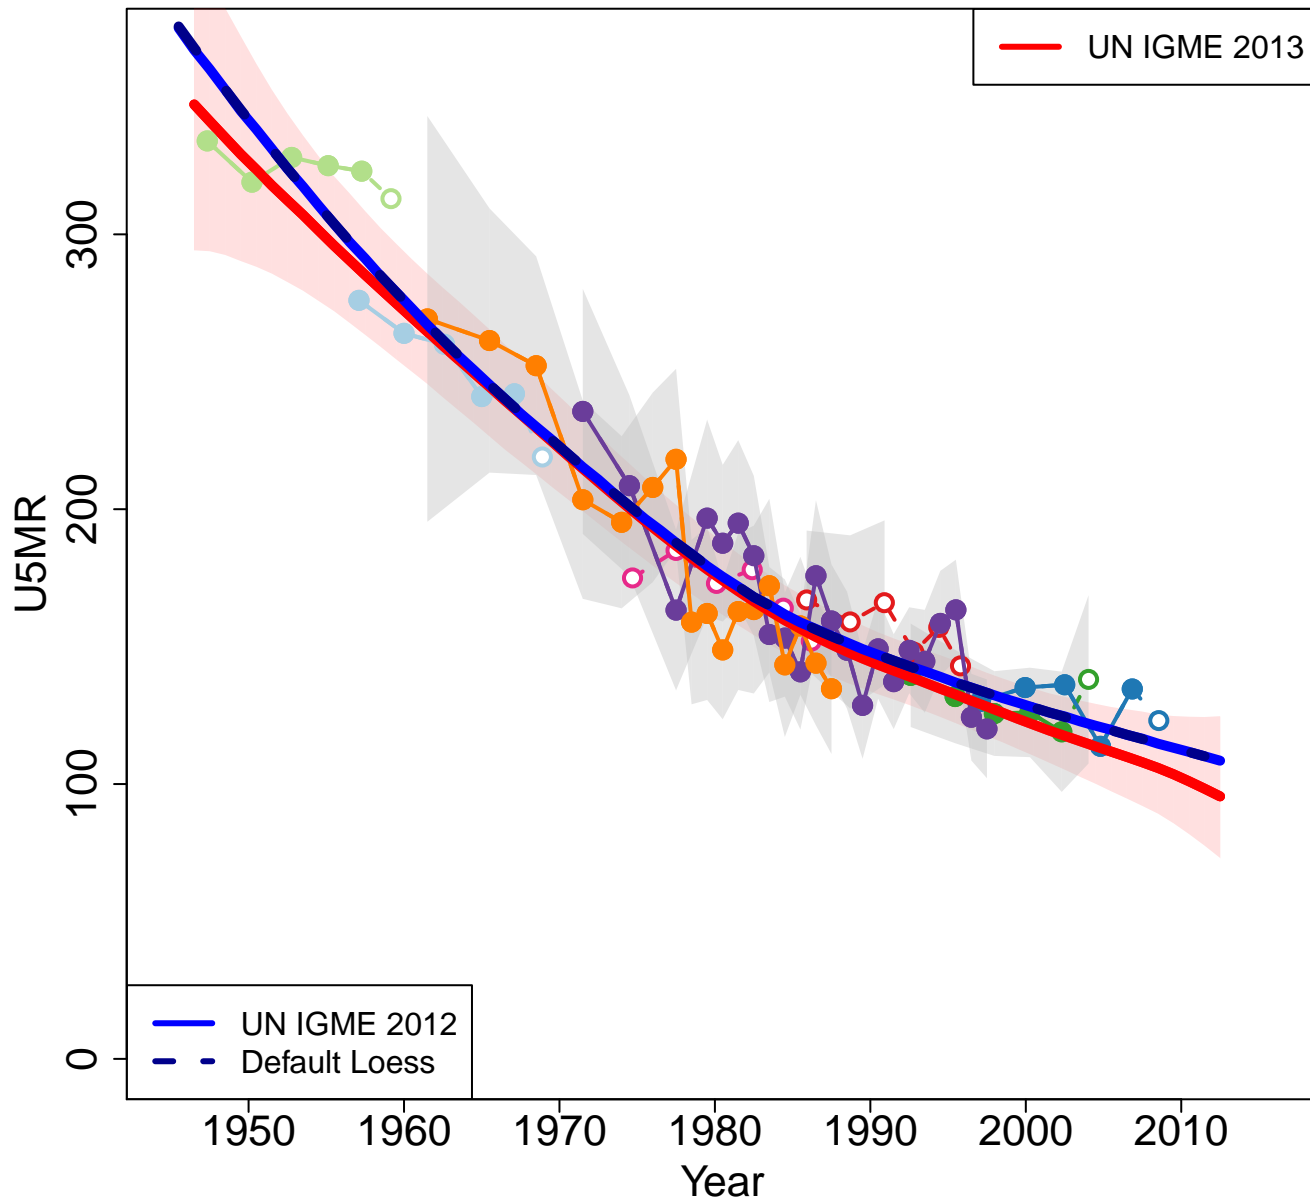

# Zoomed in

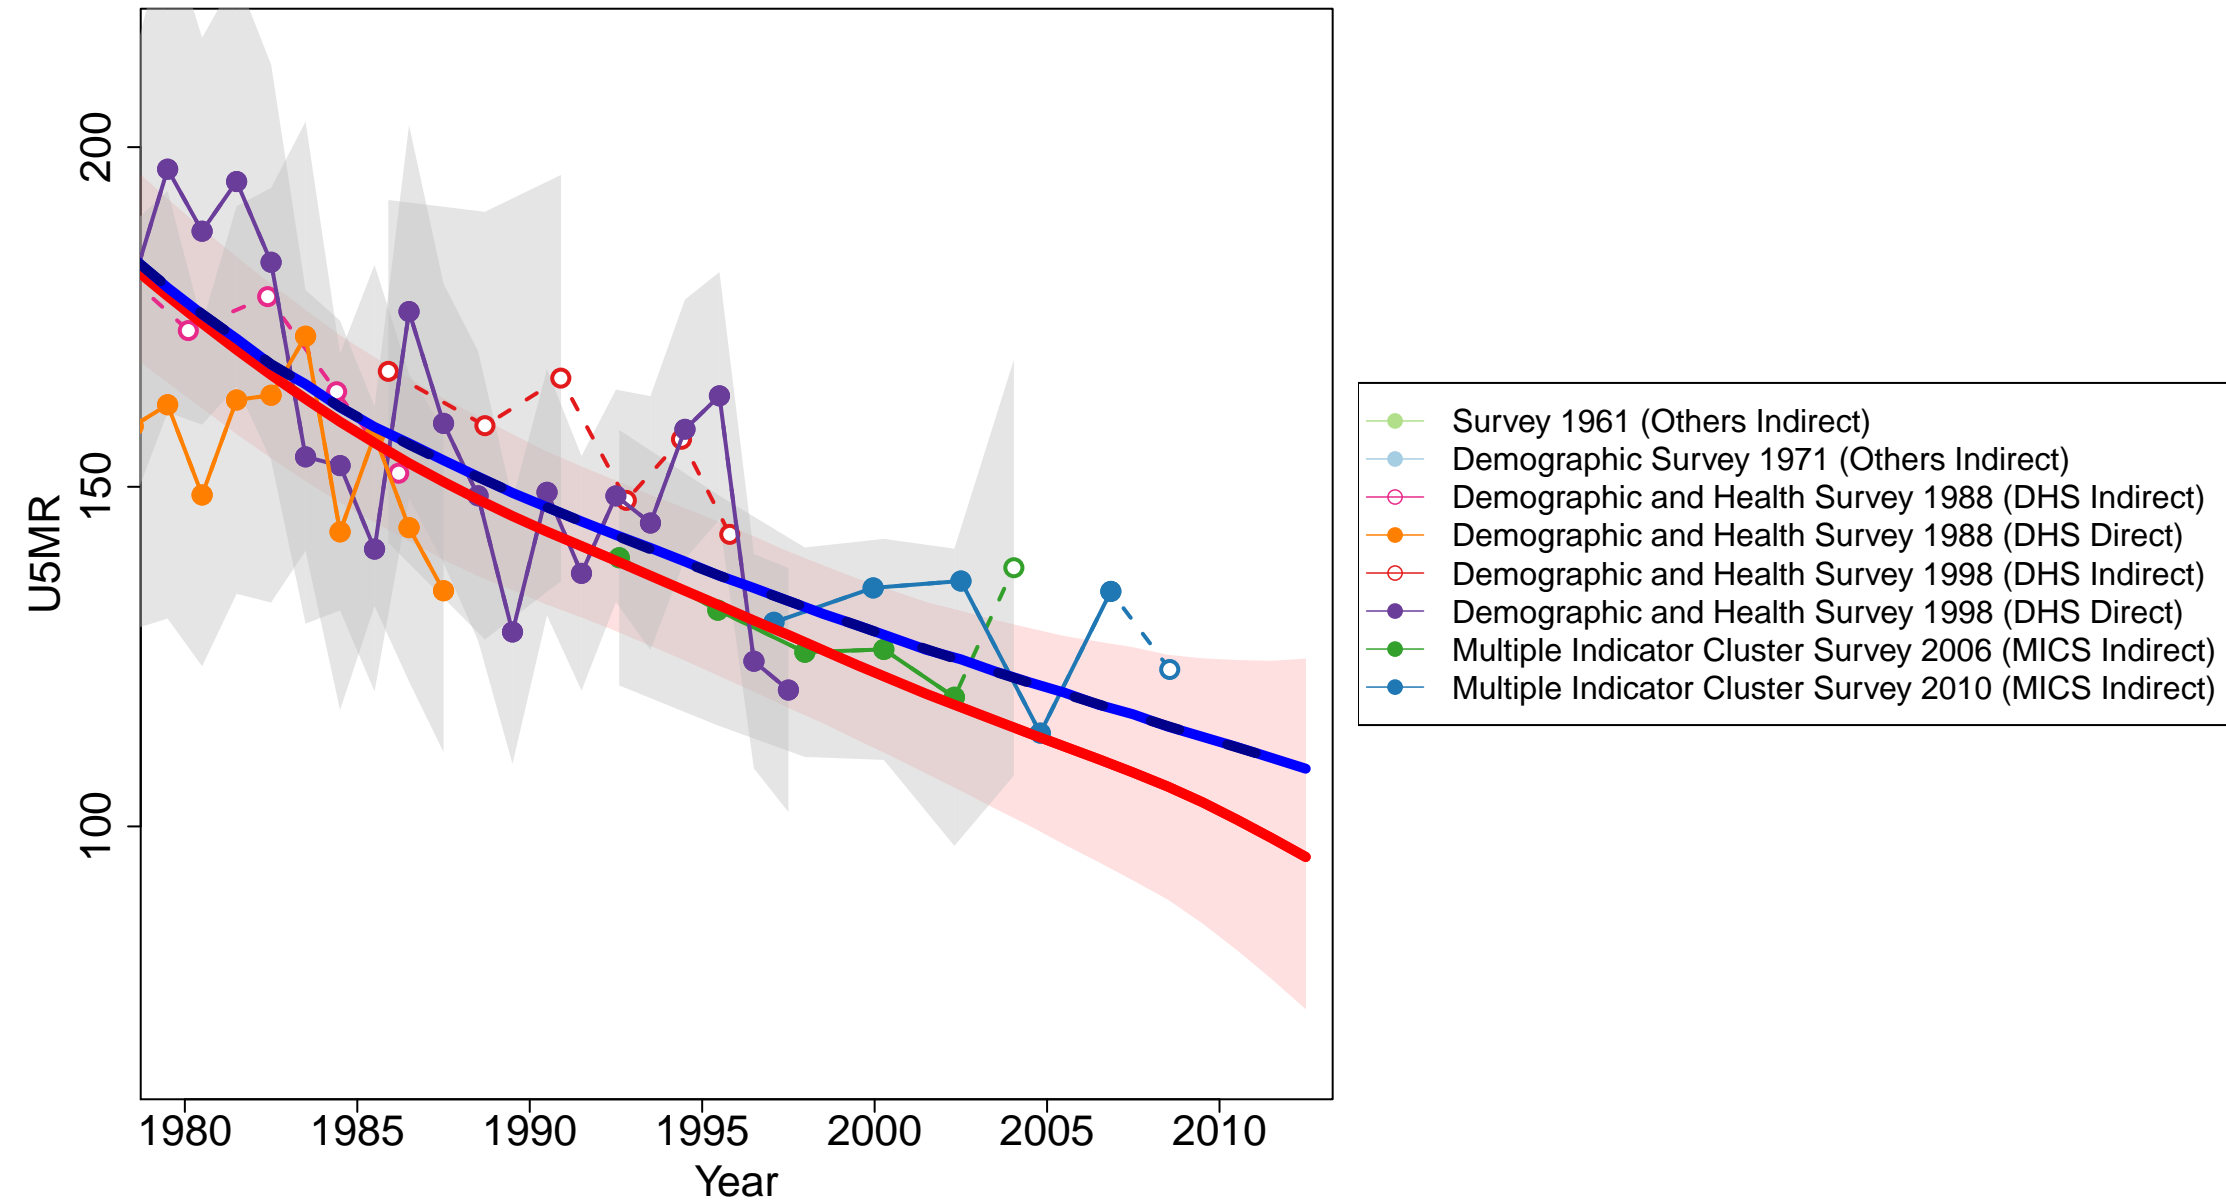

# Tonga

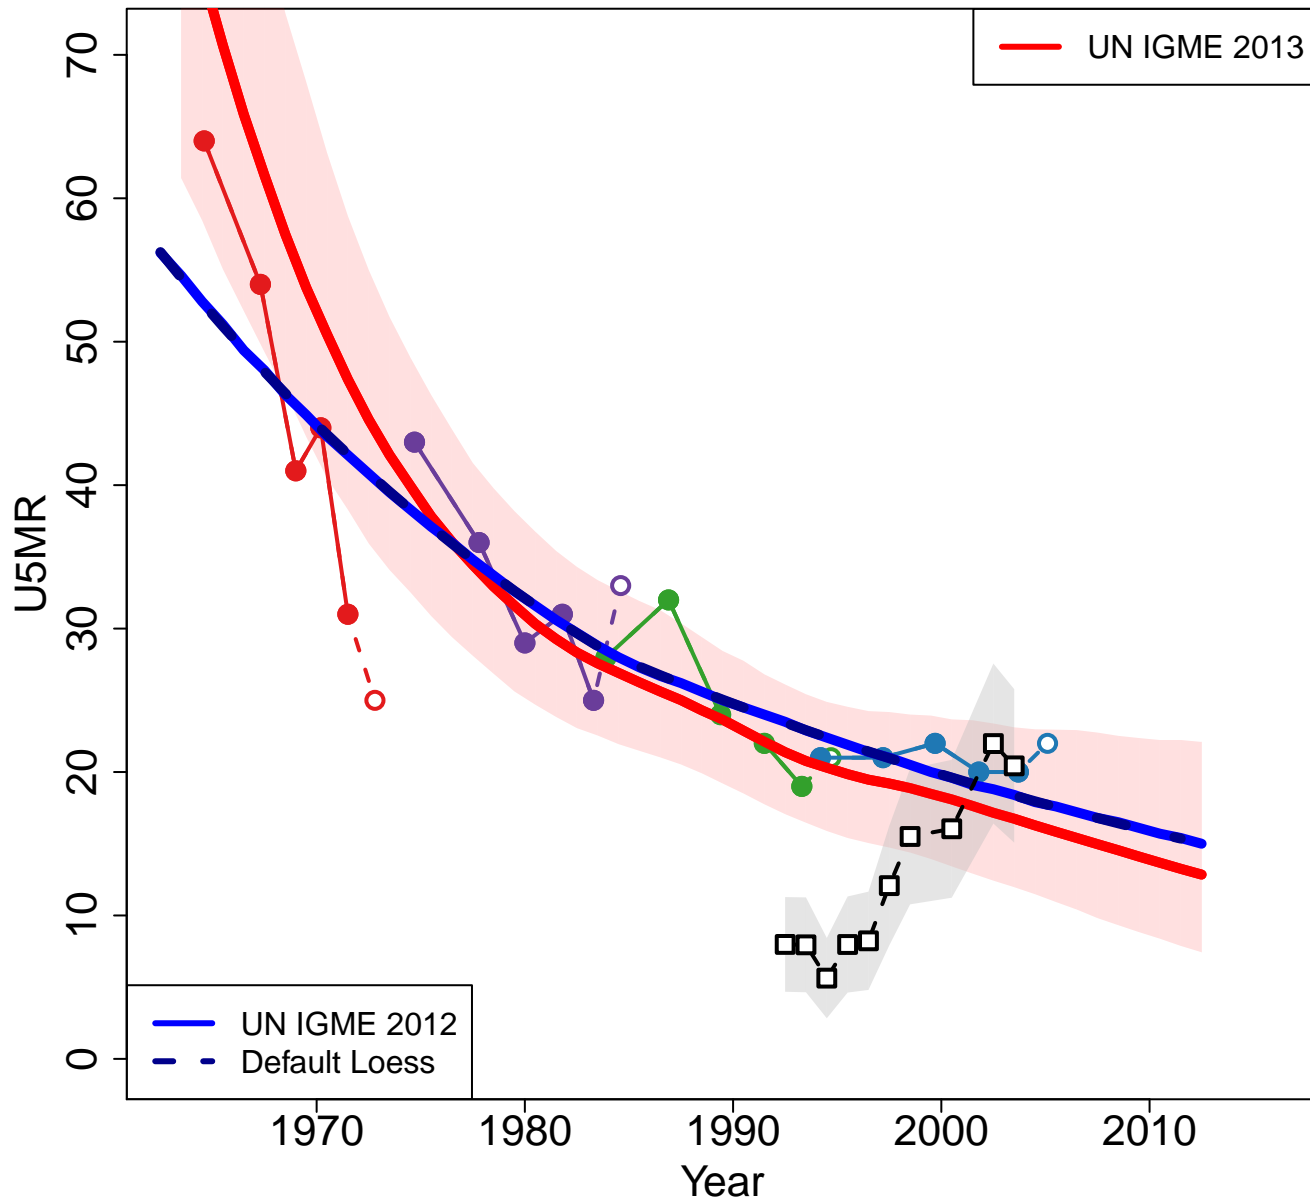

# Zoomed in

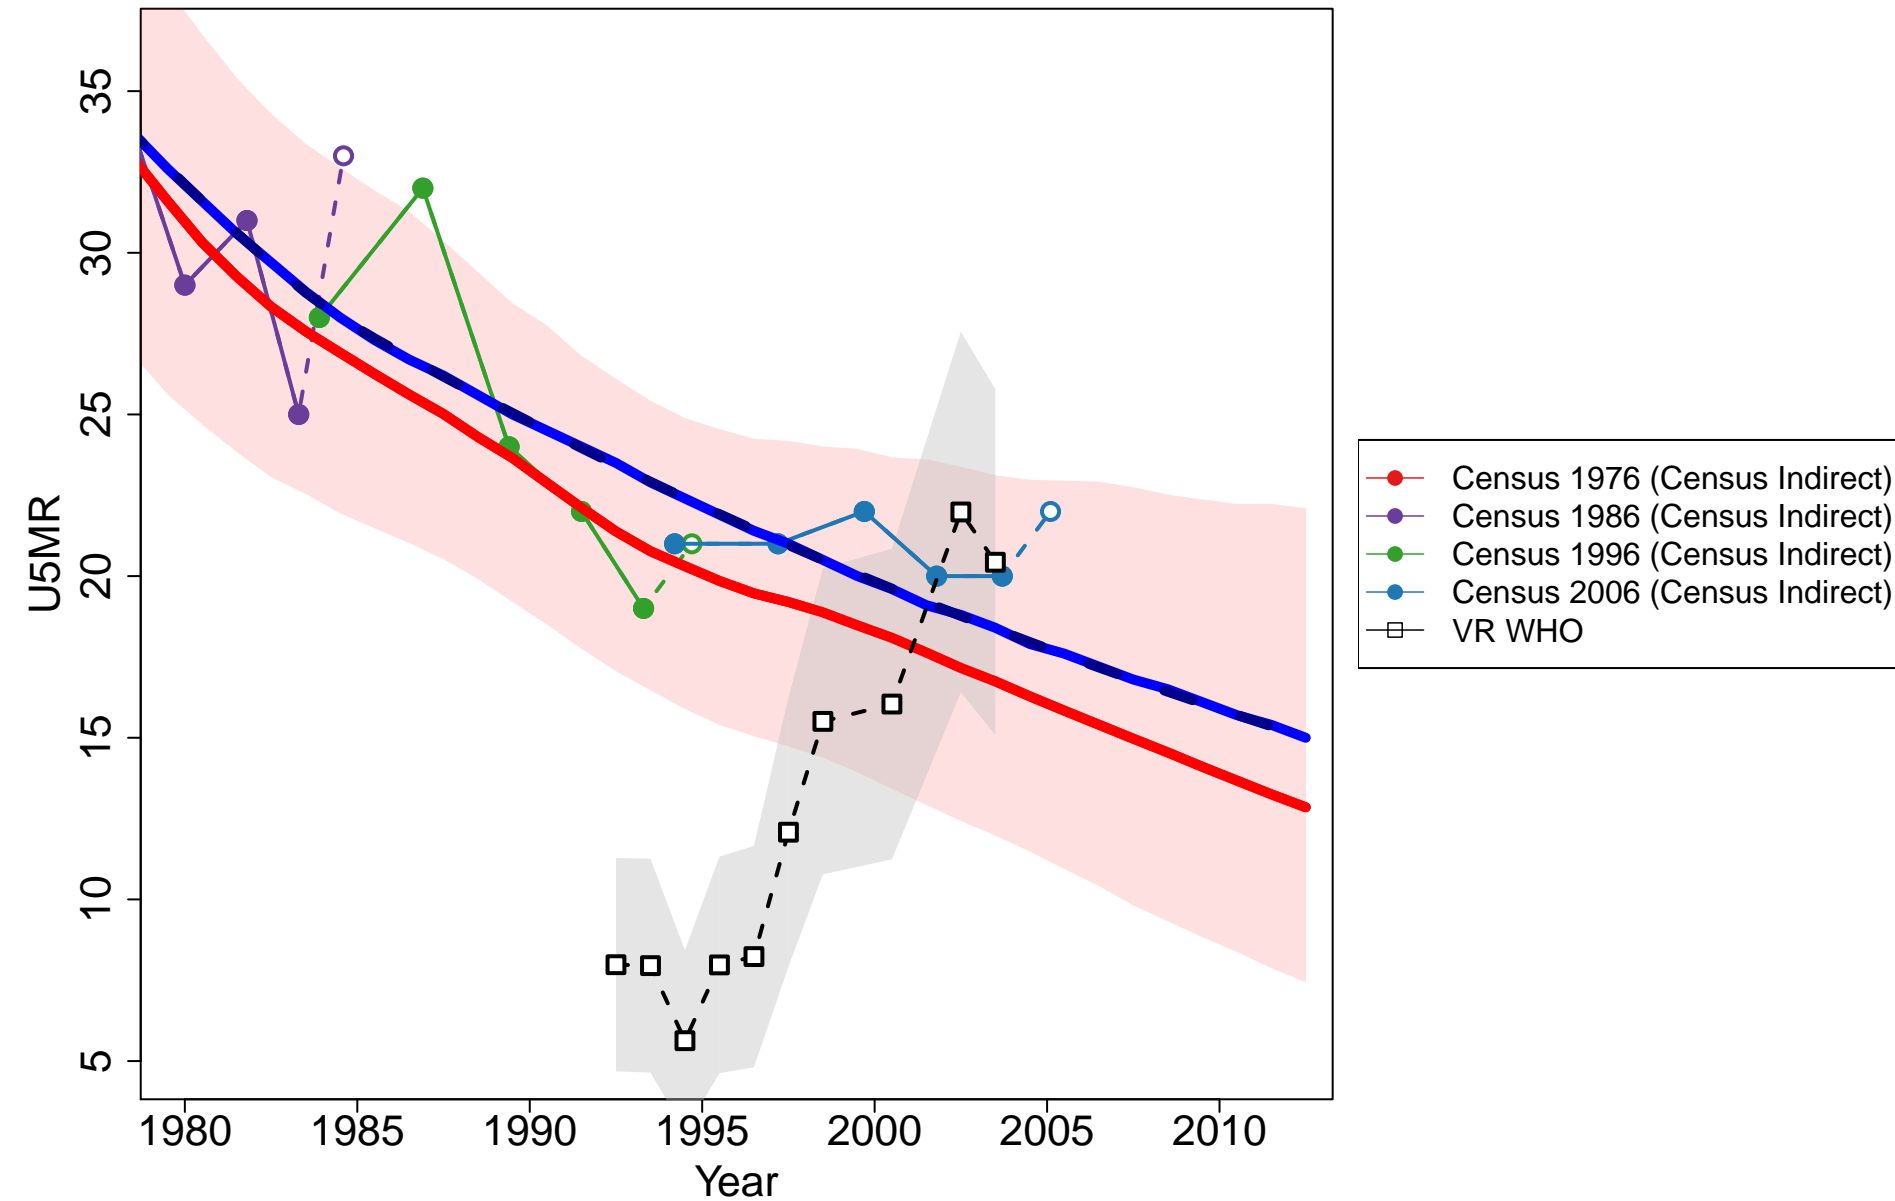

# Trinidad & Tobago

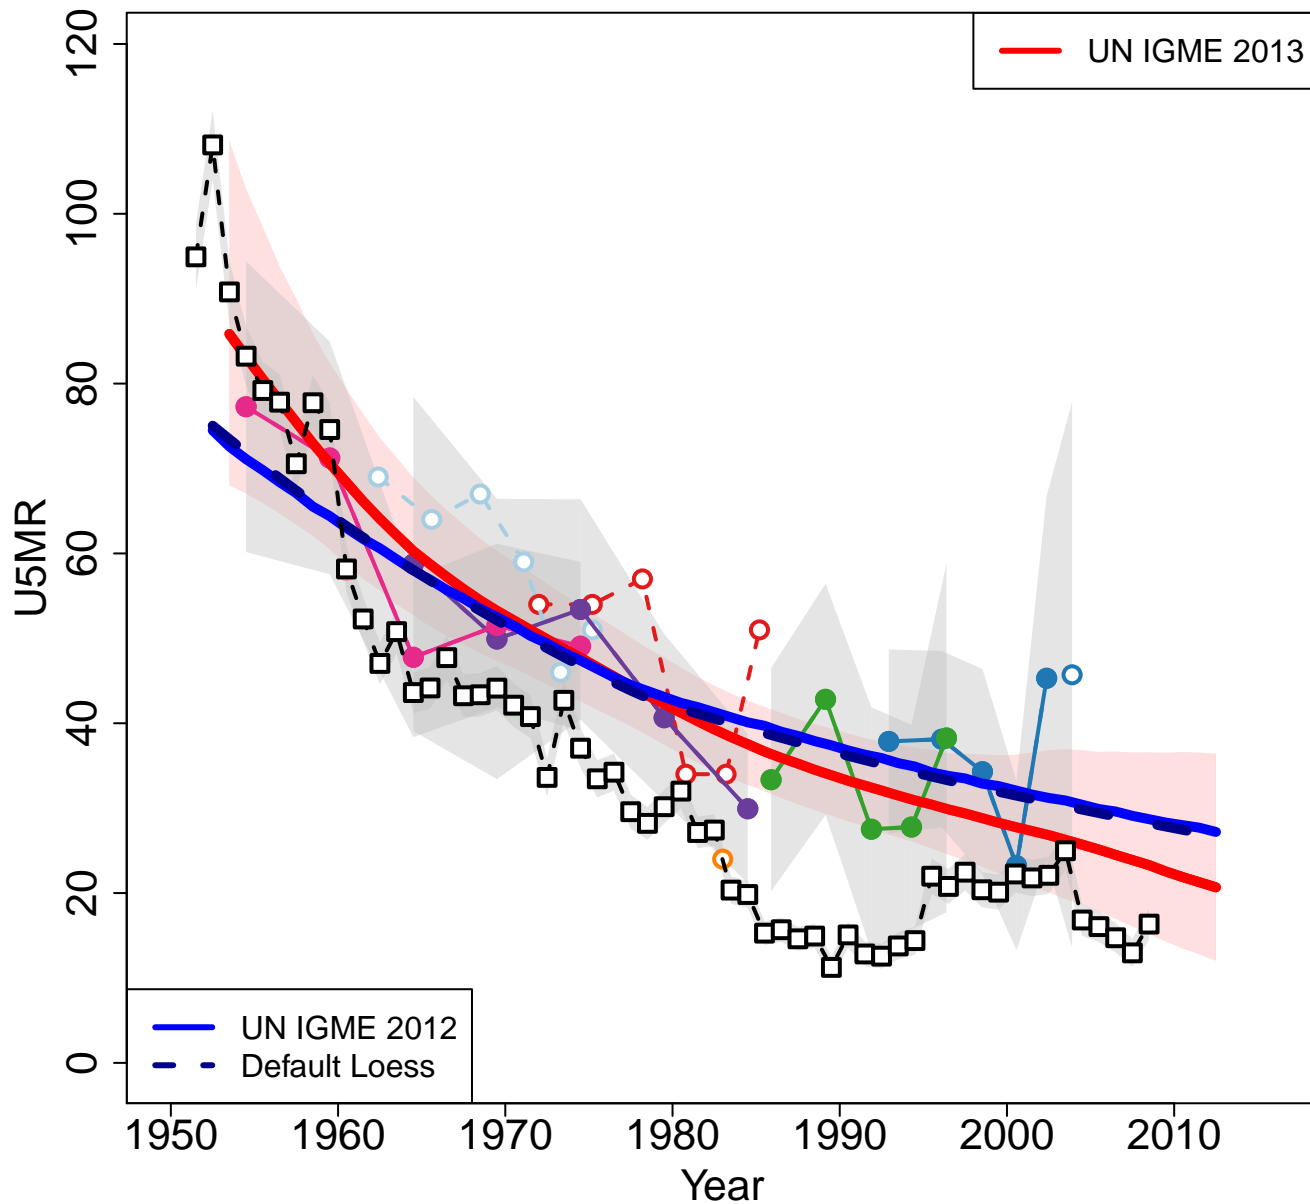

# Zoomed in

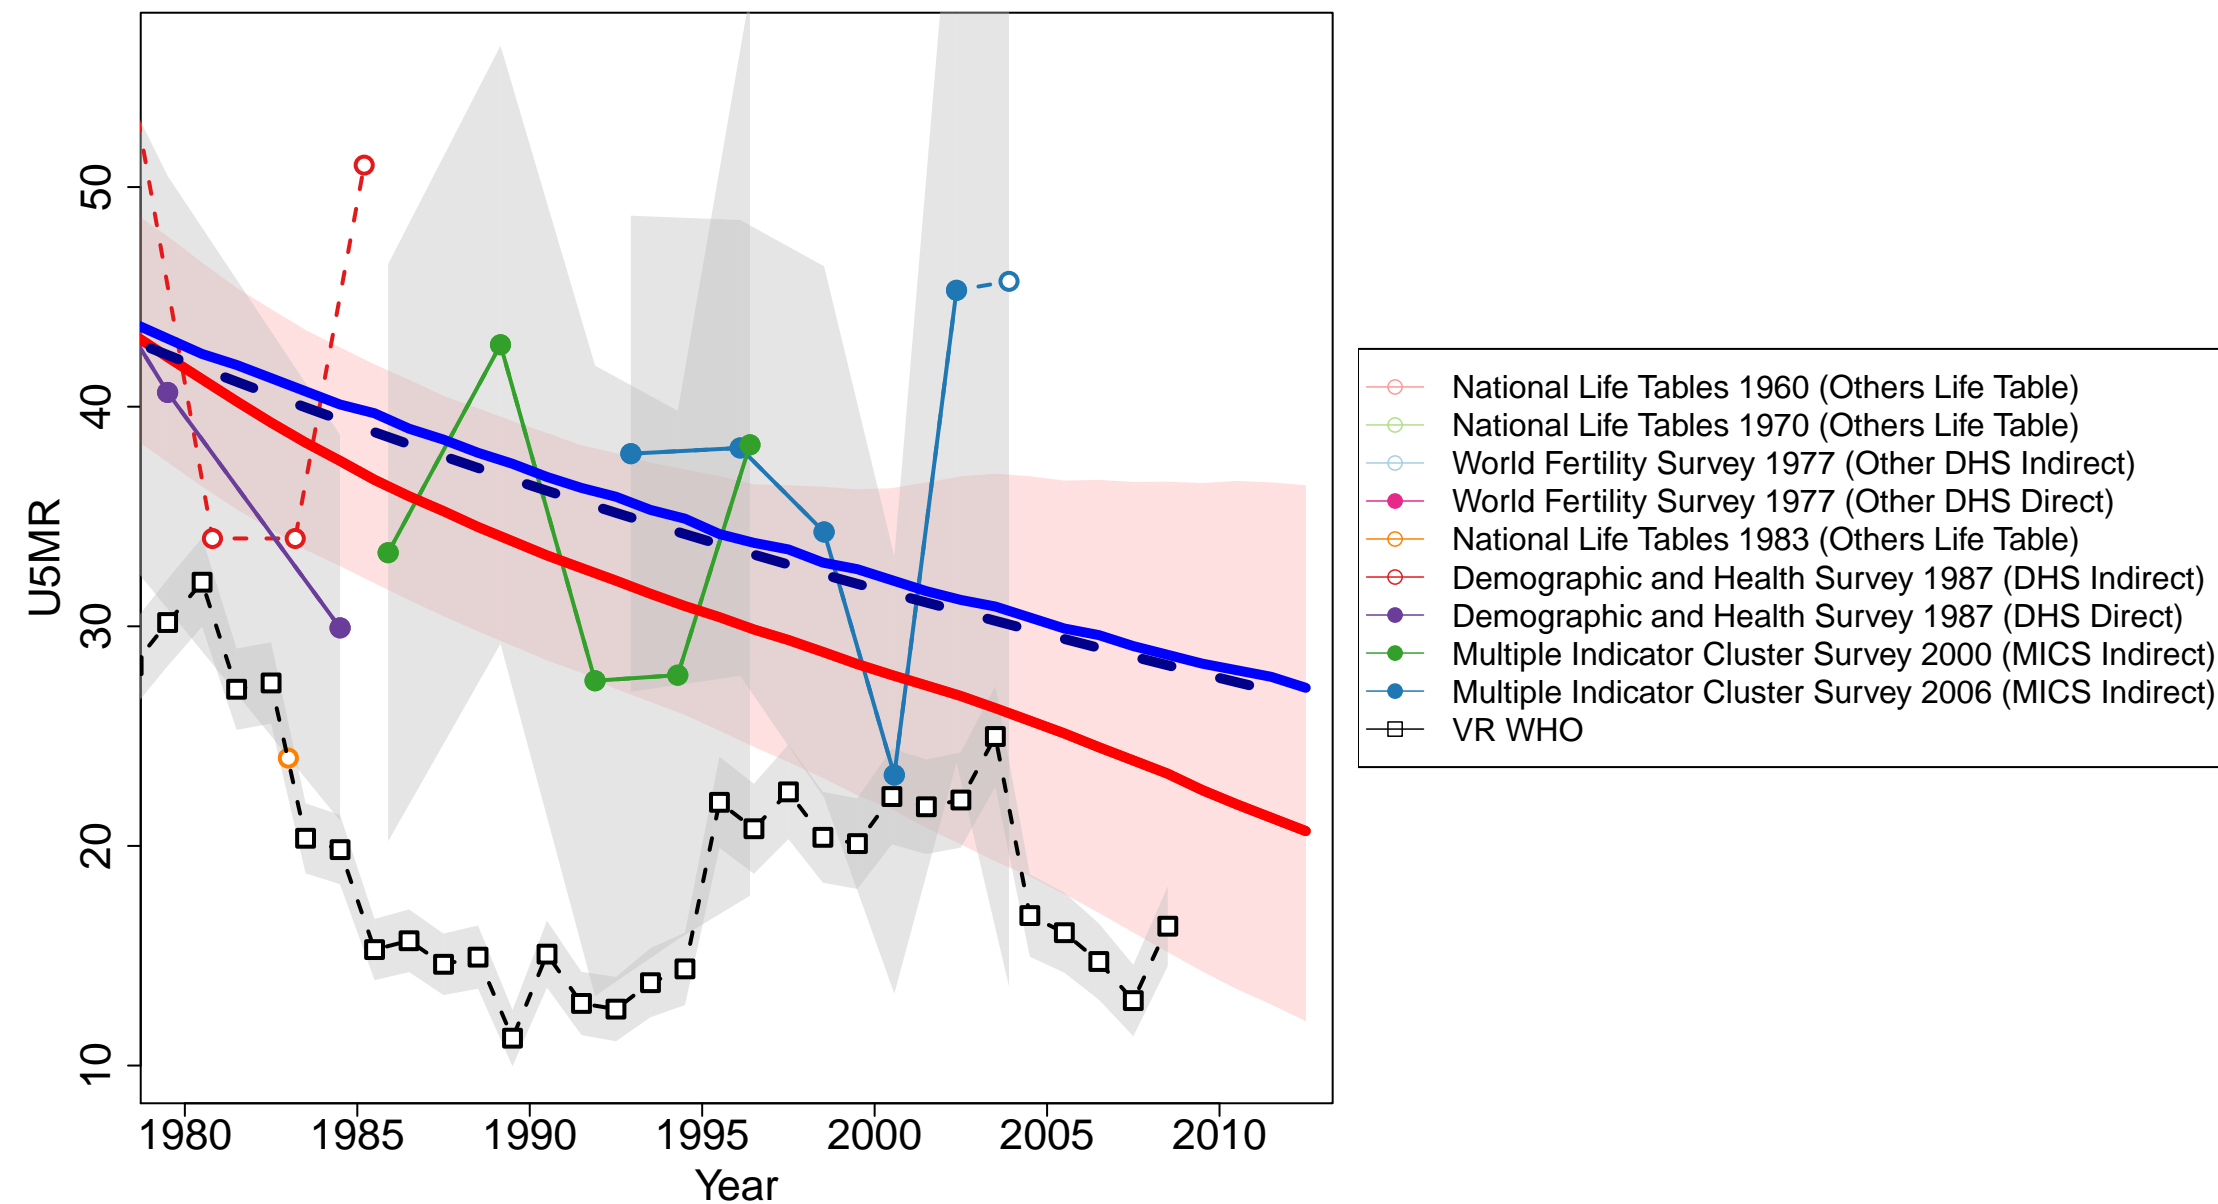

# Tunisia

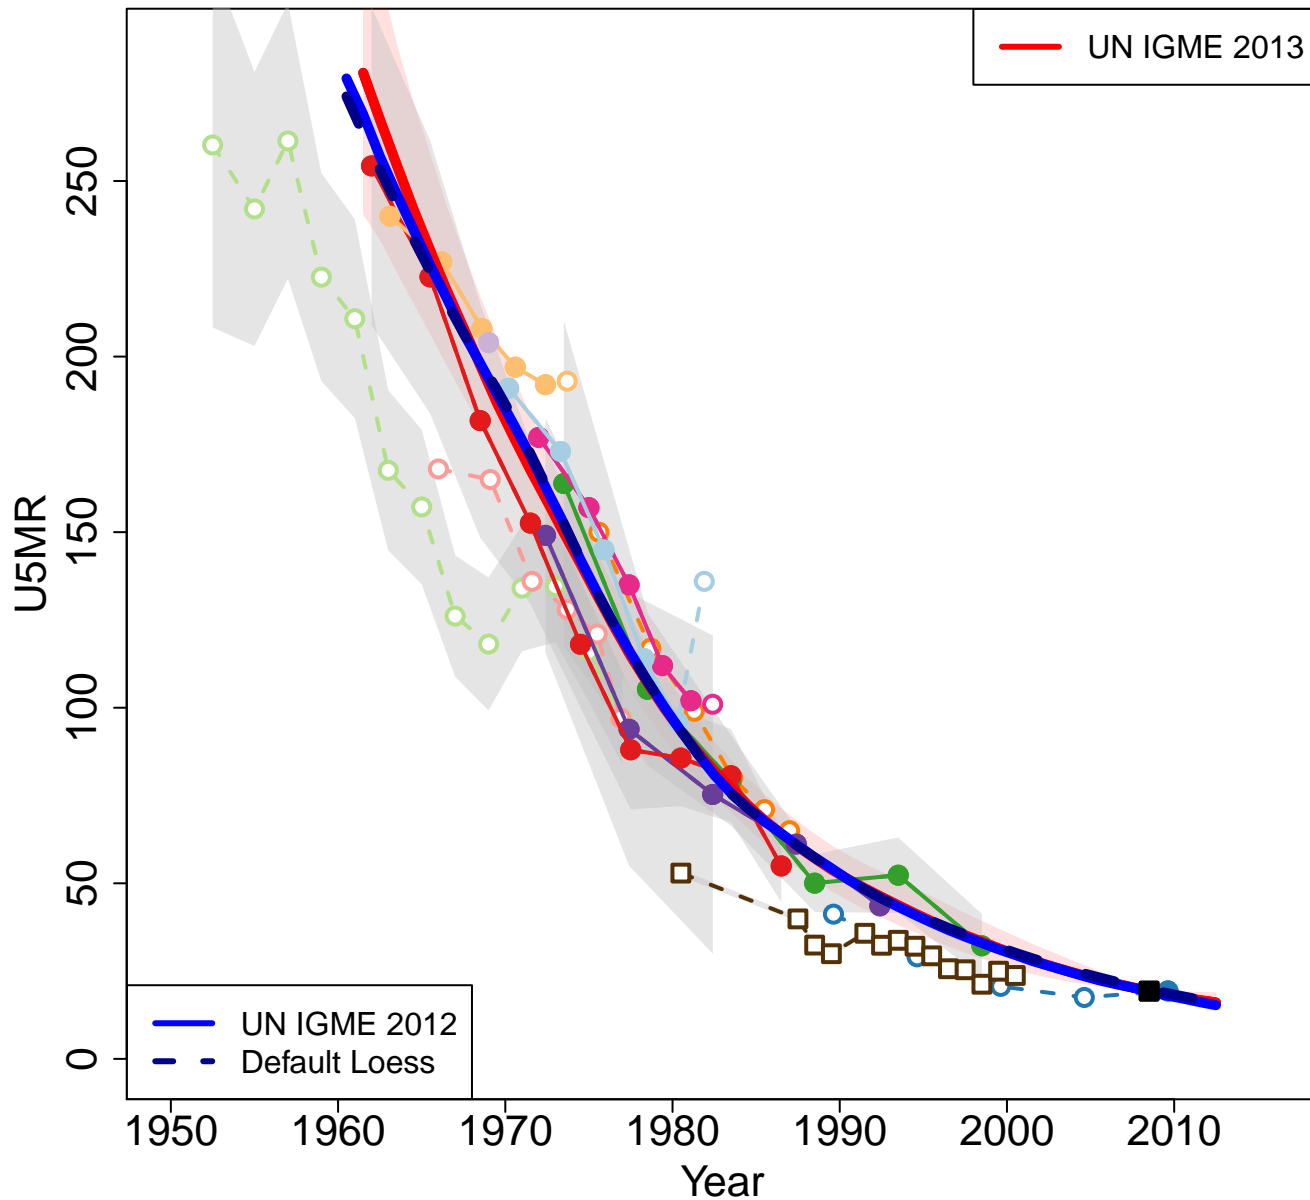

# Zoomed in

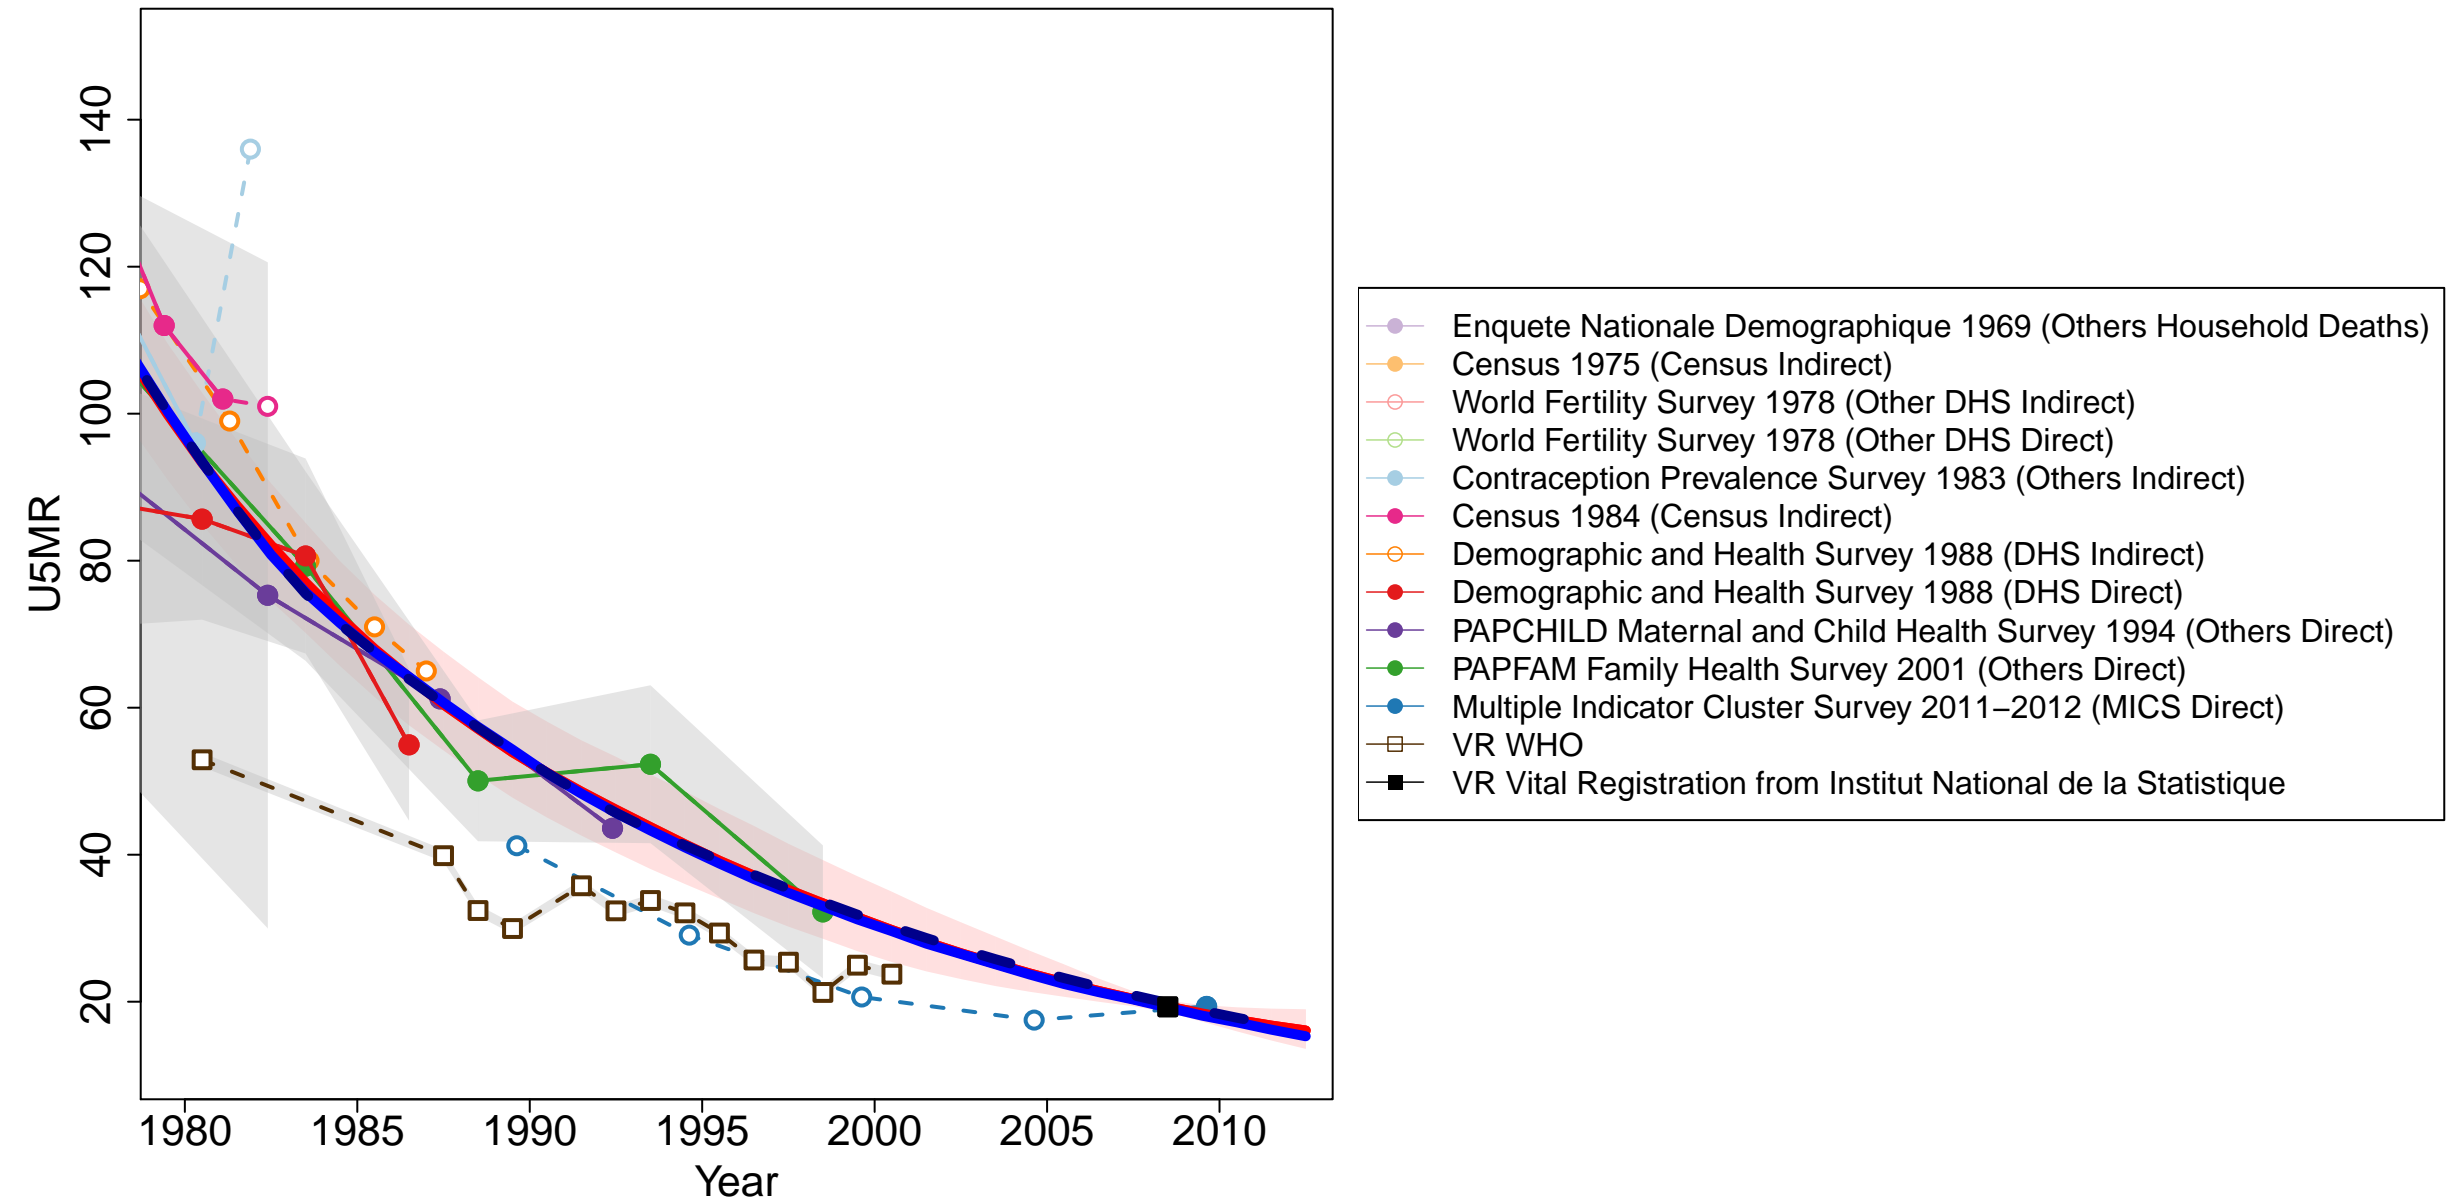

# Turkey

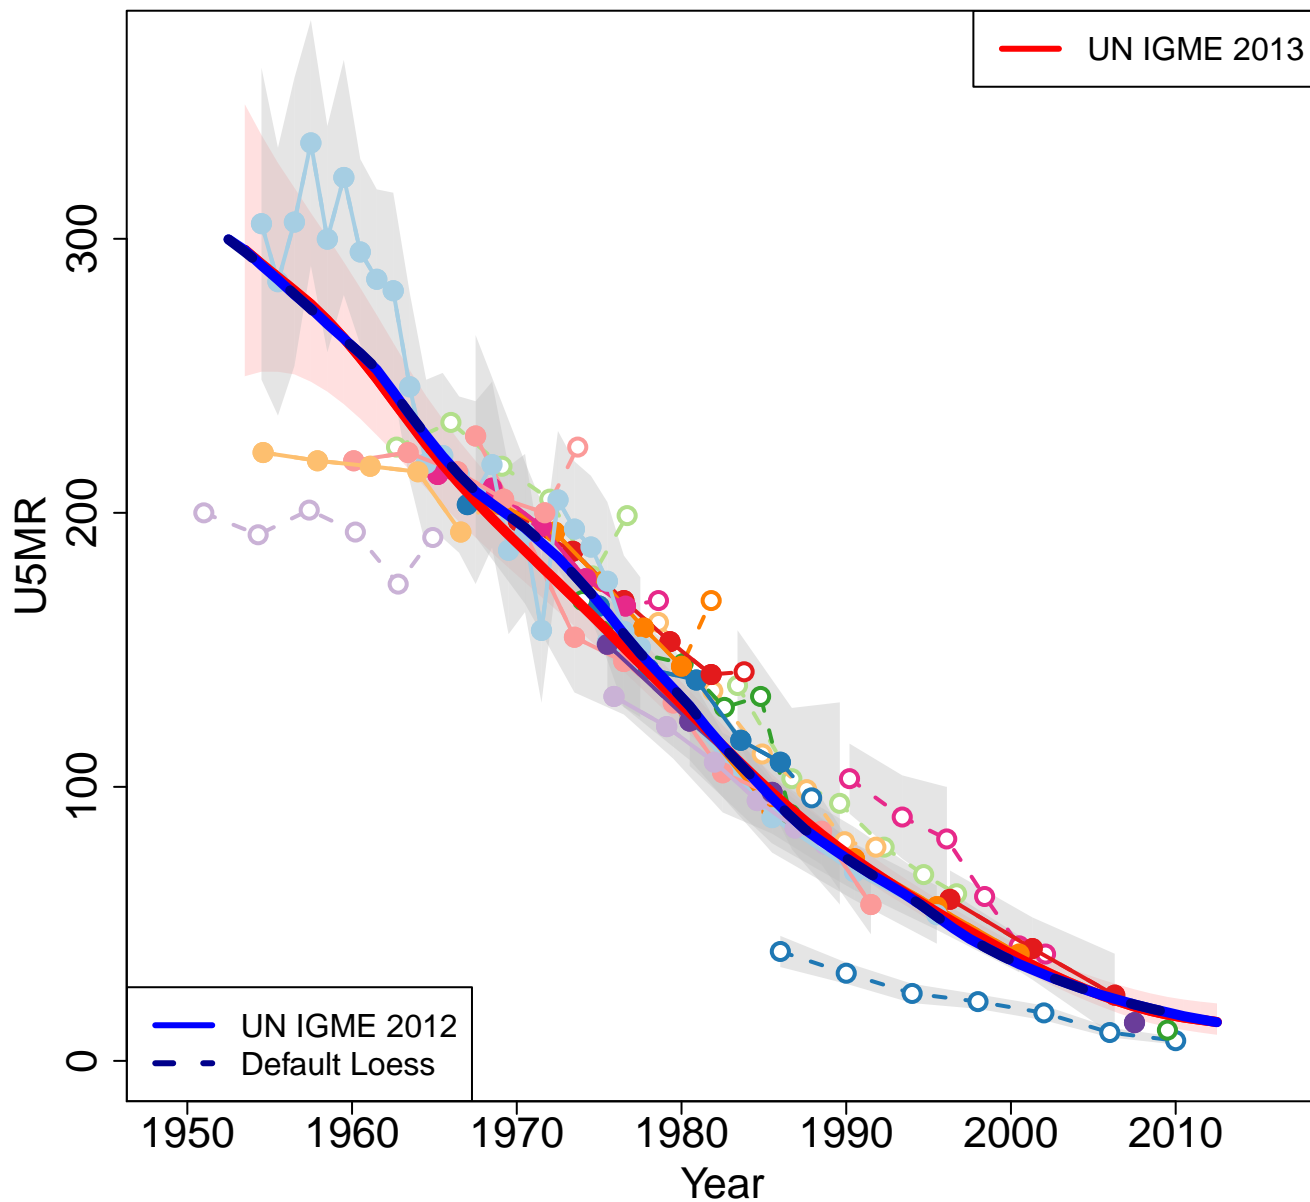

# Zoomed in

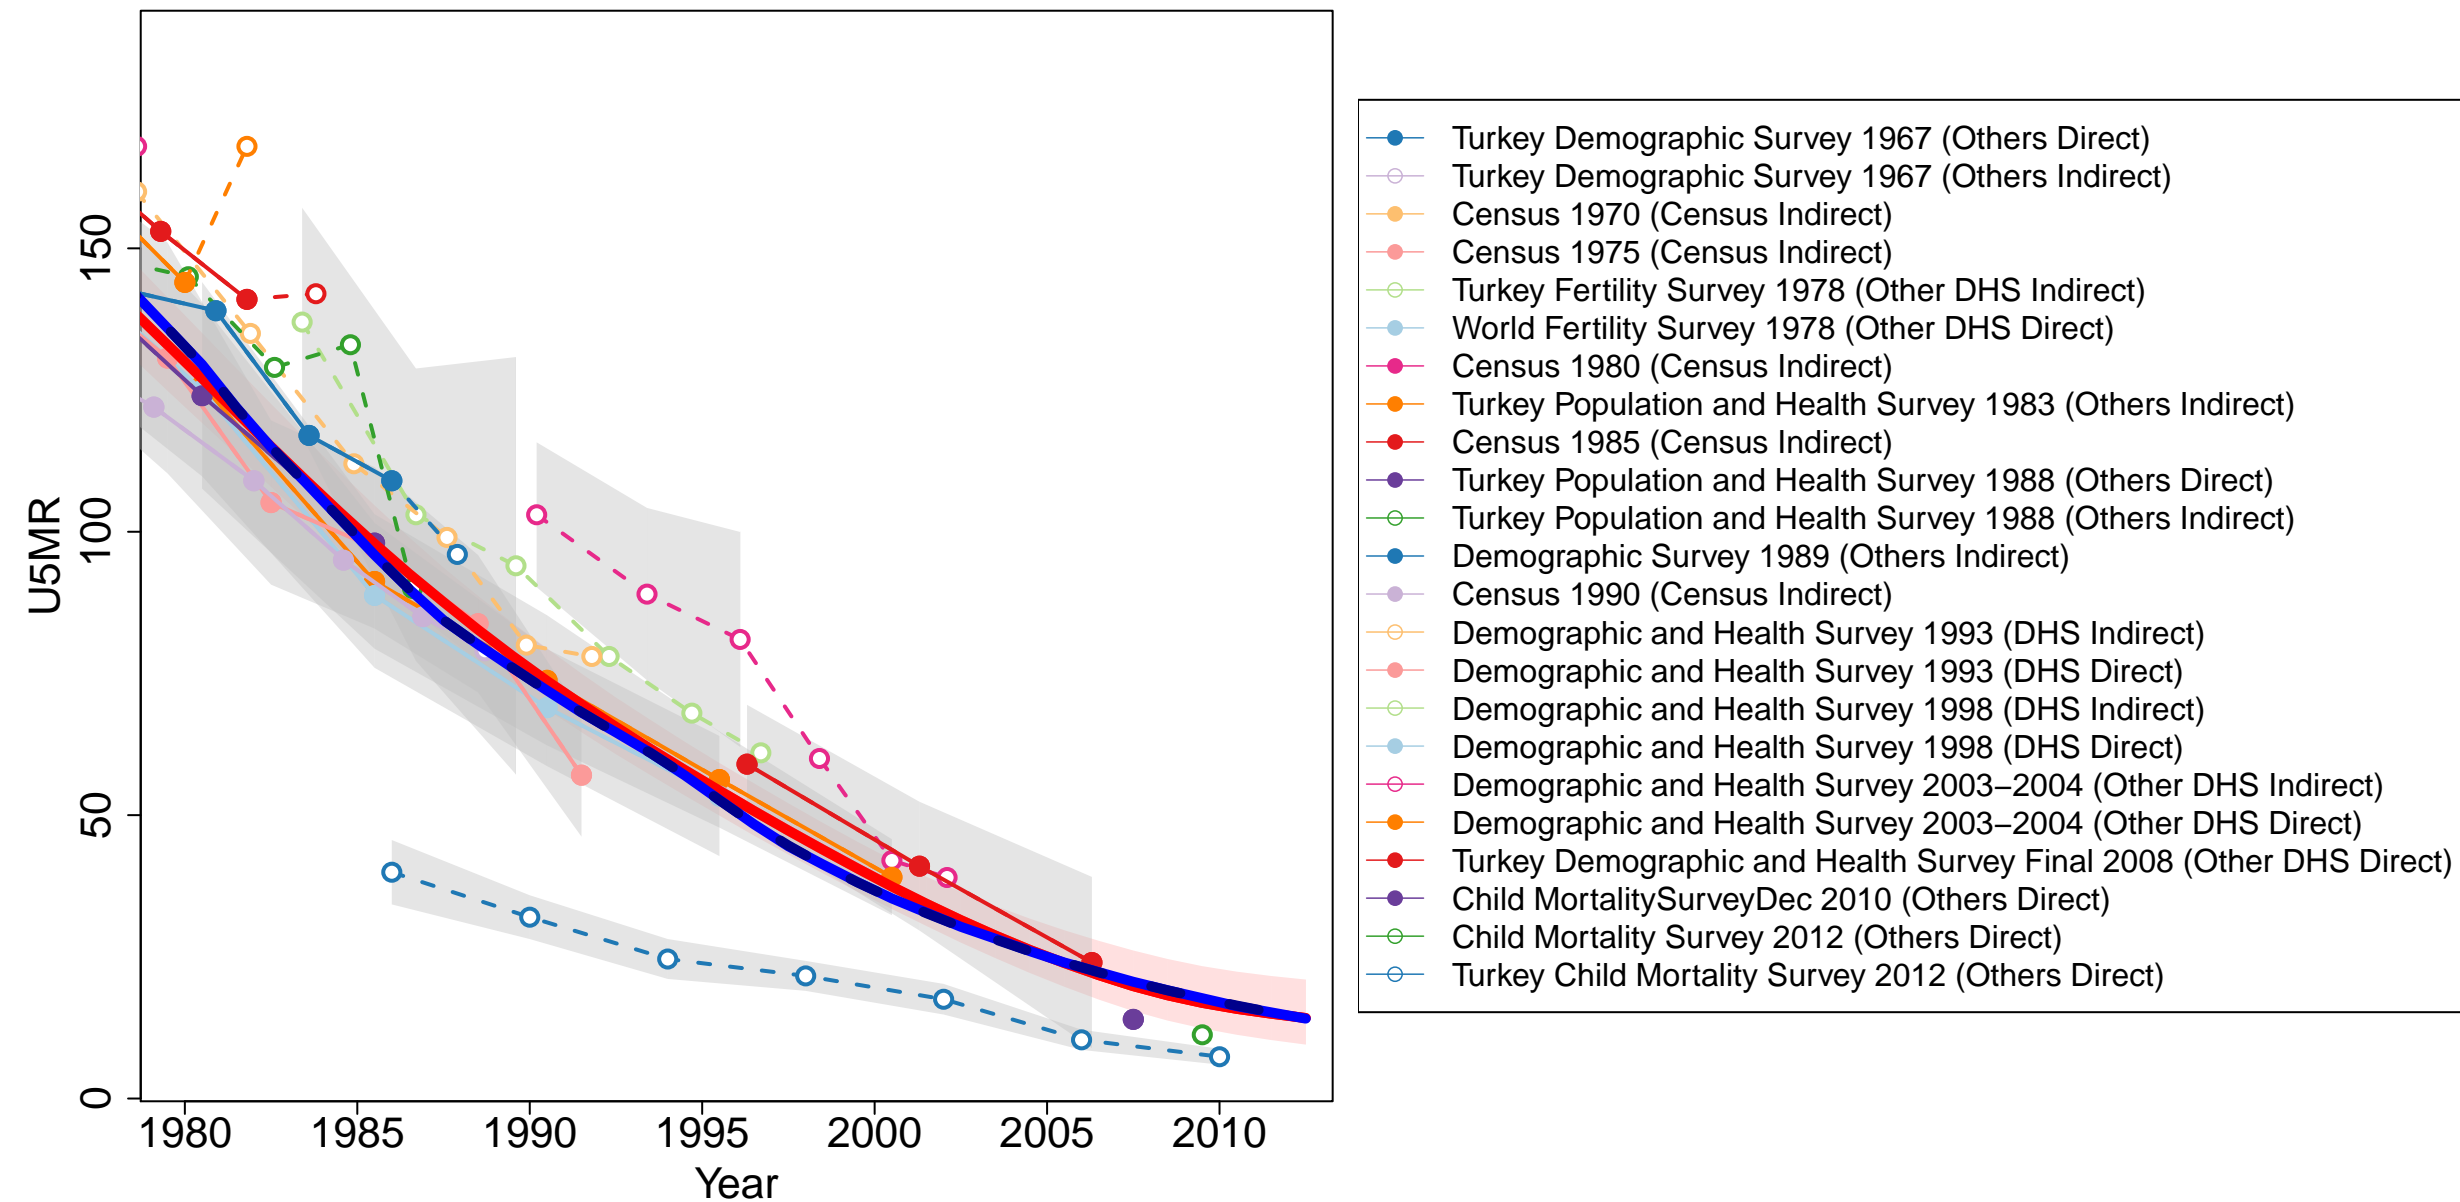



# Turkmenistan

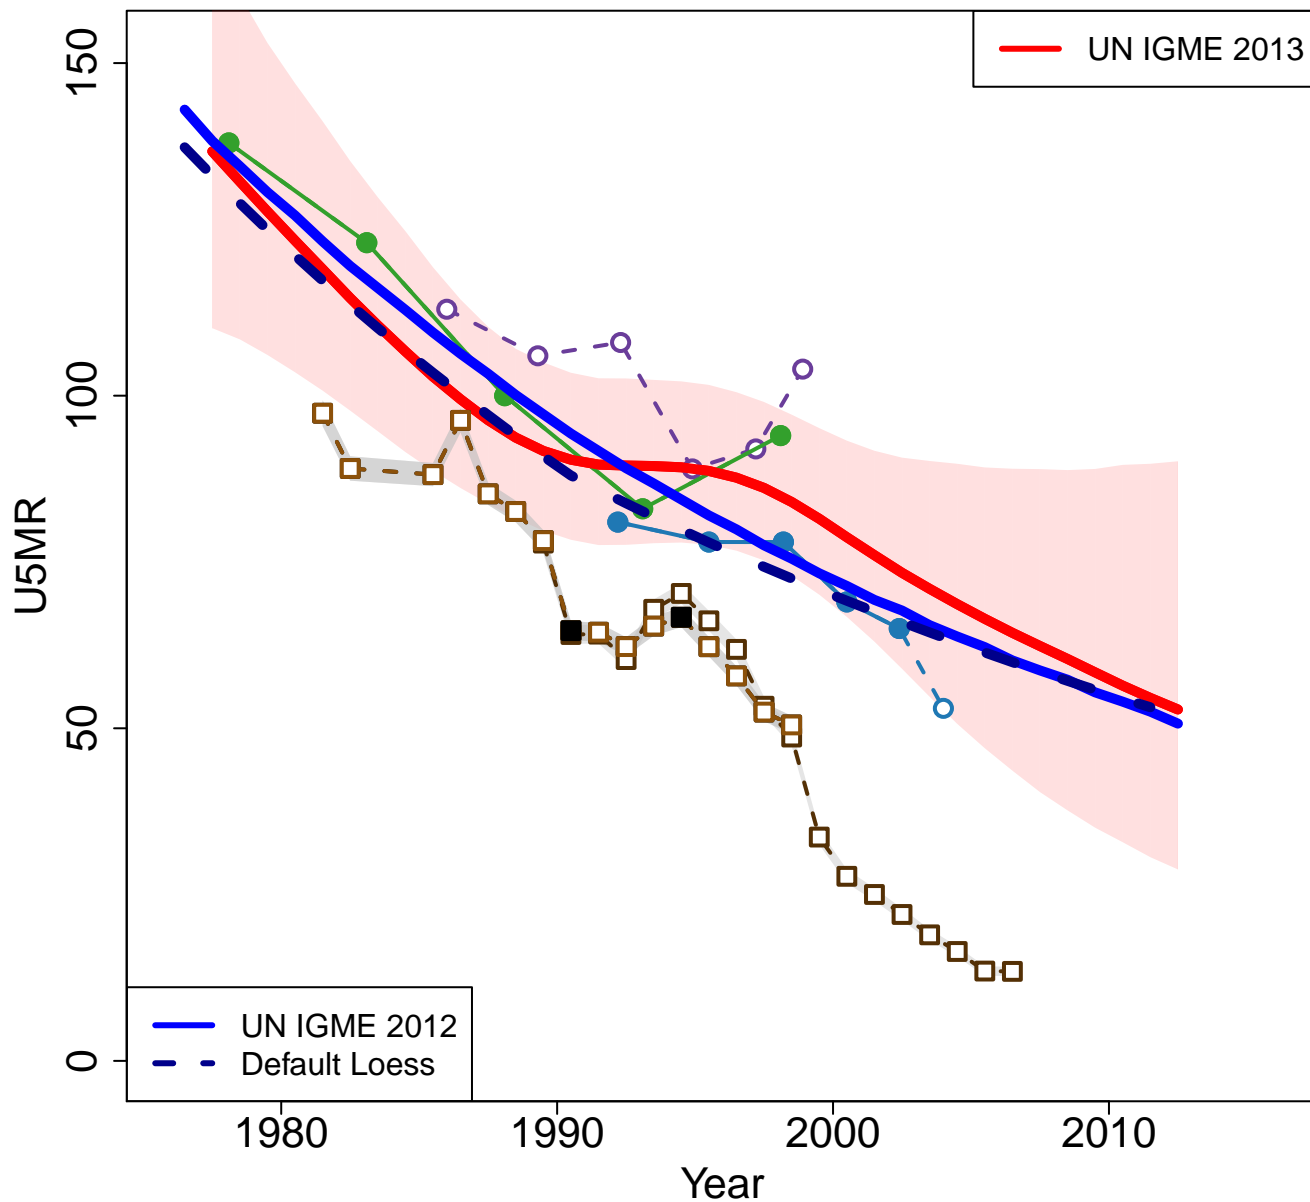

# Zoomed in

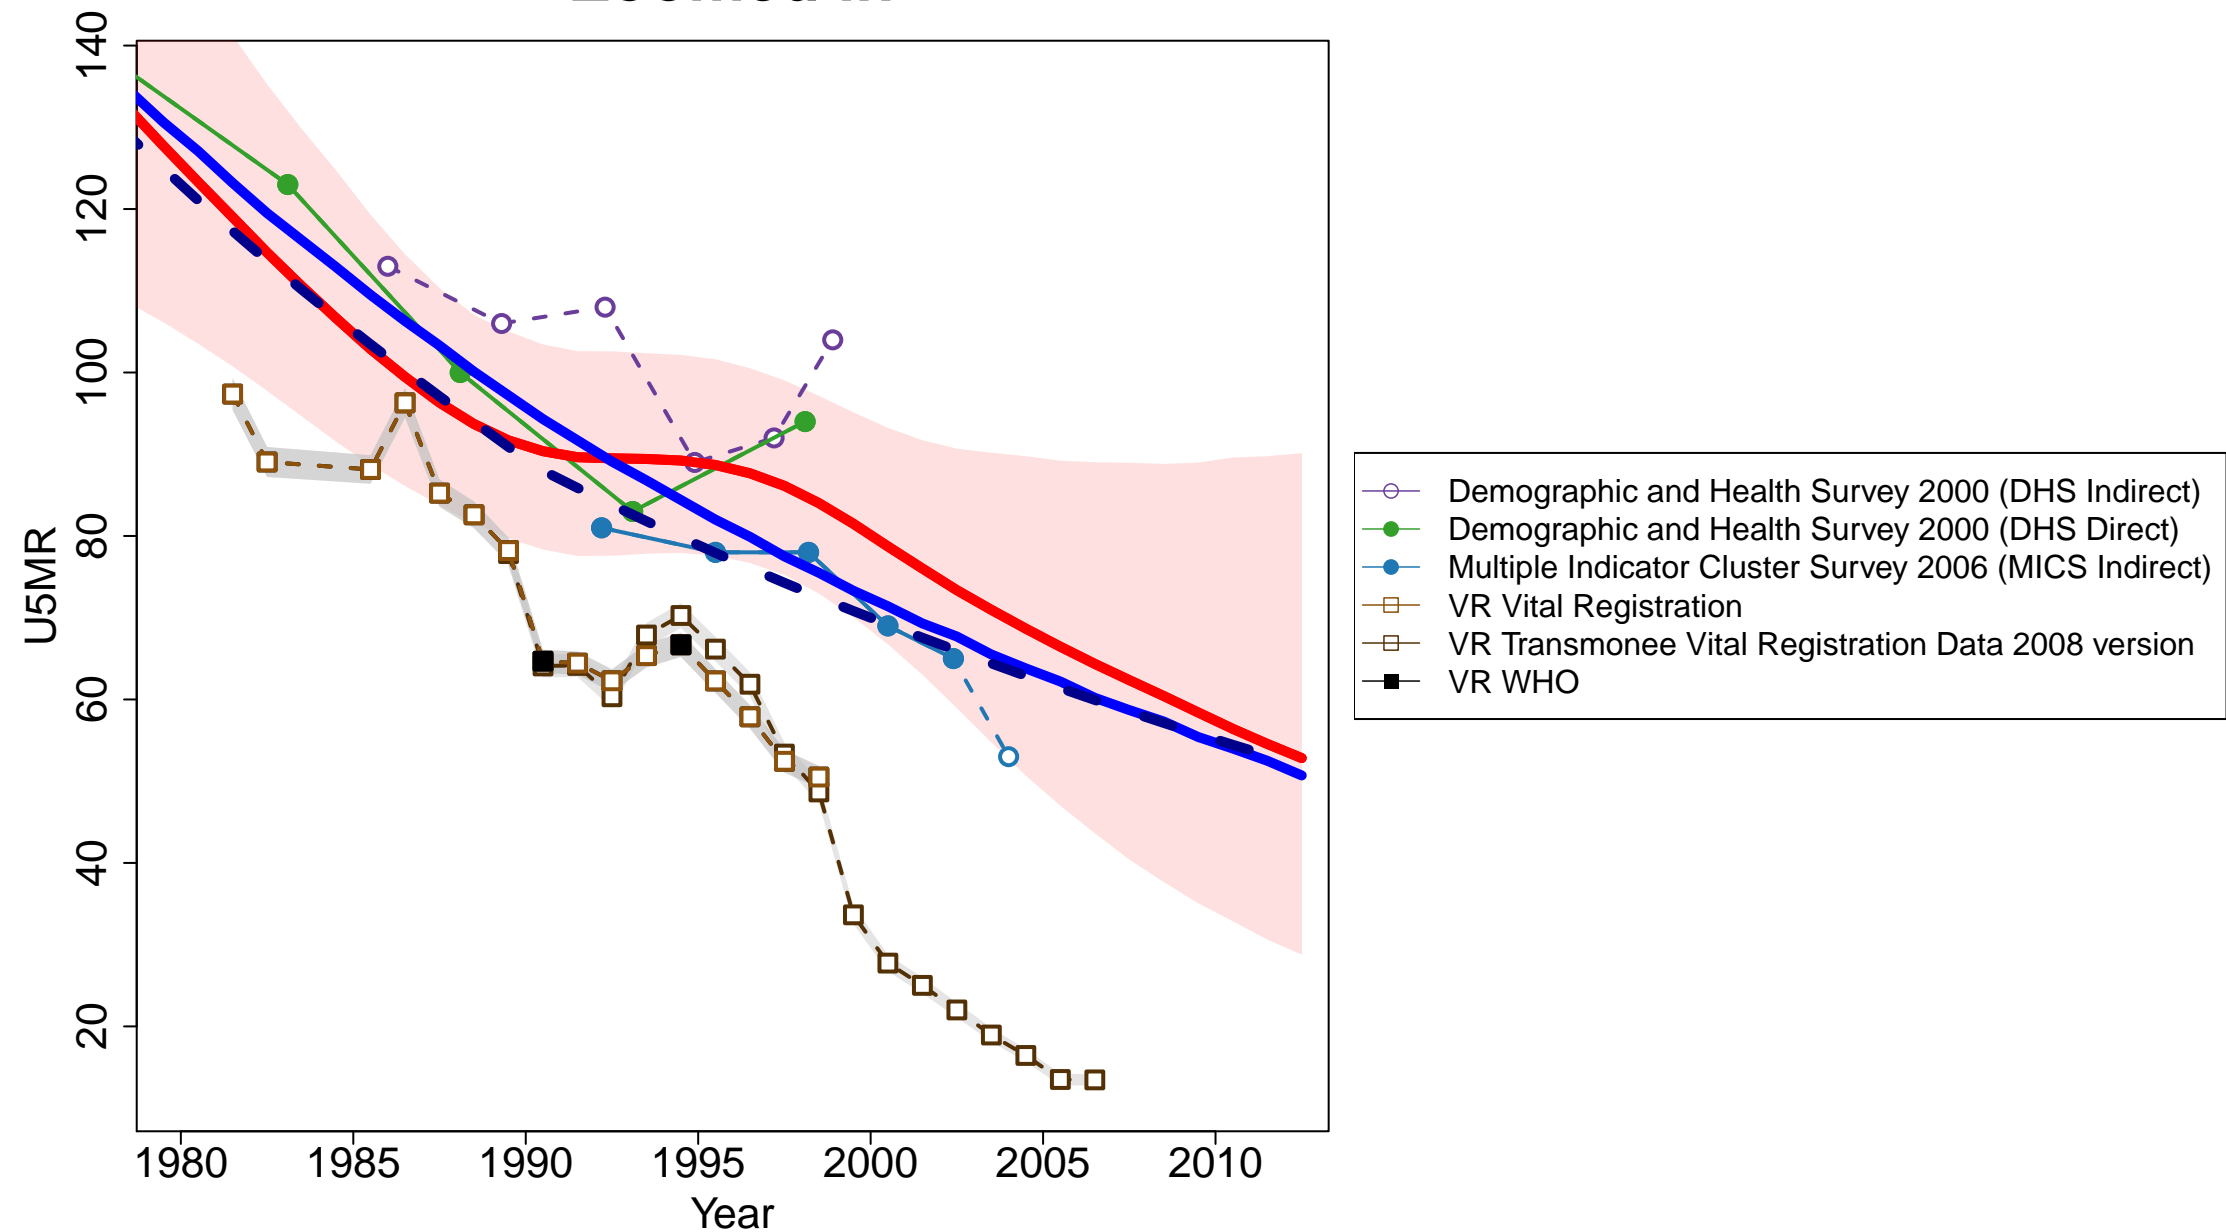

Tuvalu

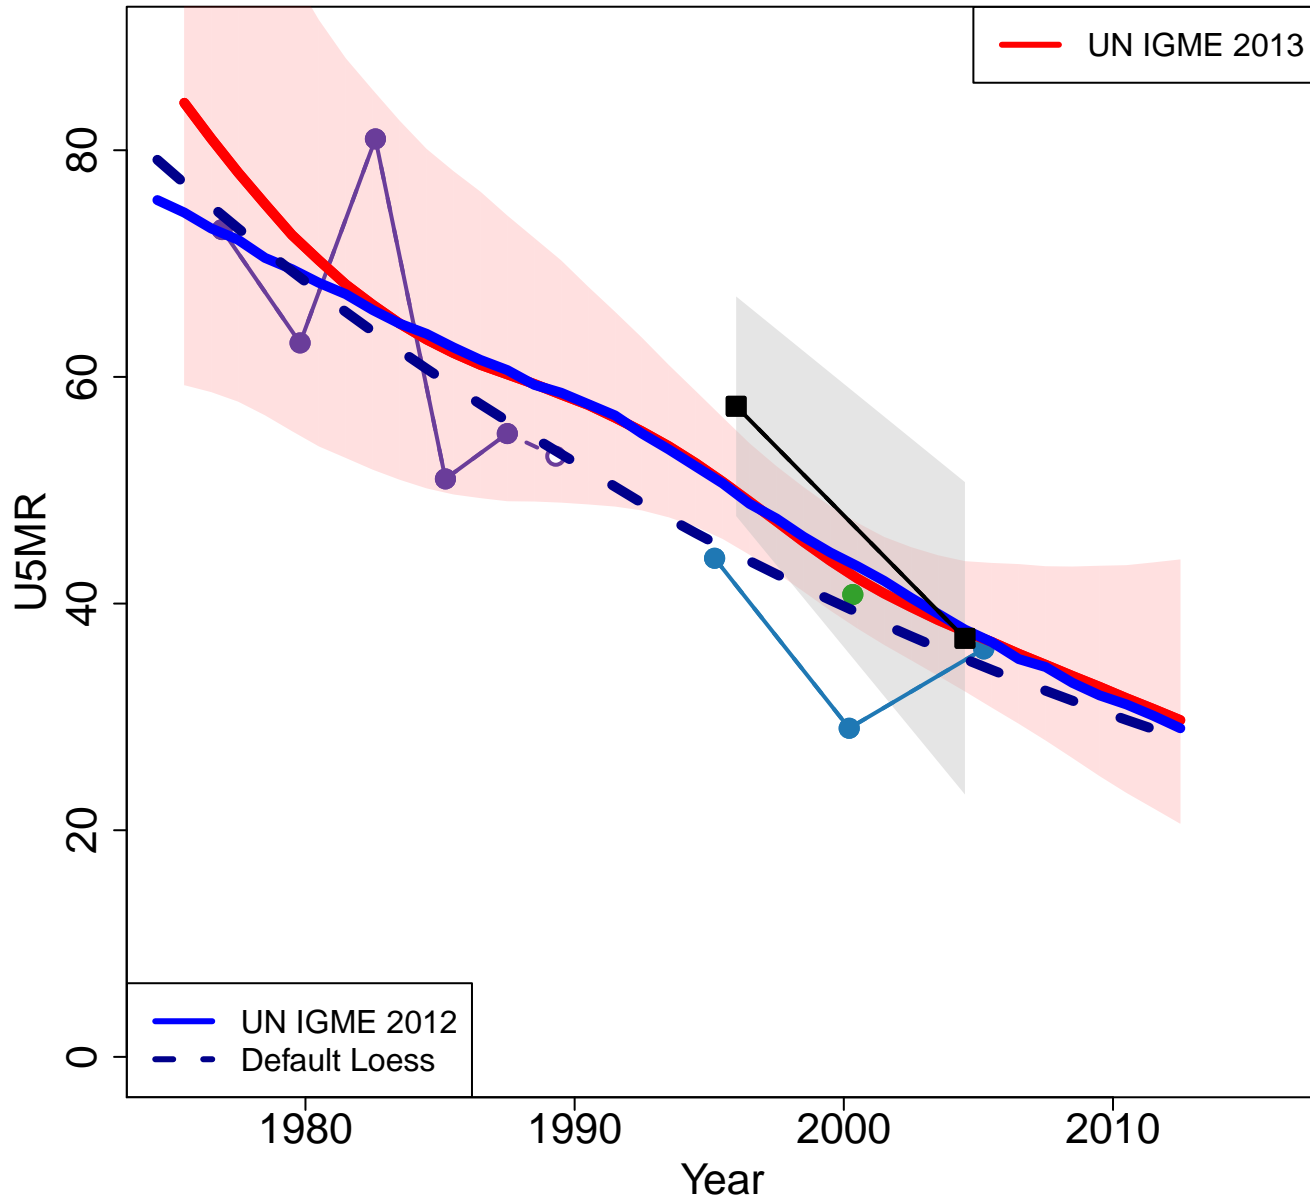

Zoomed in

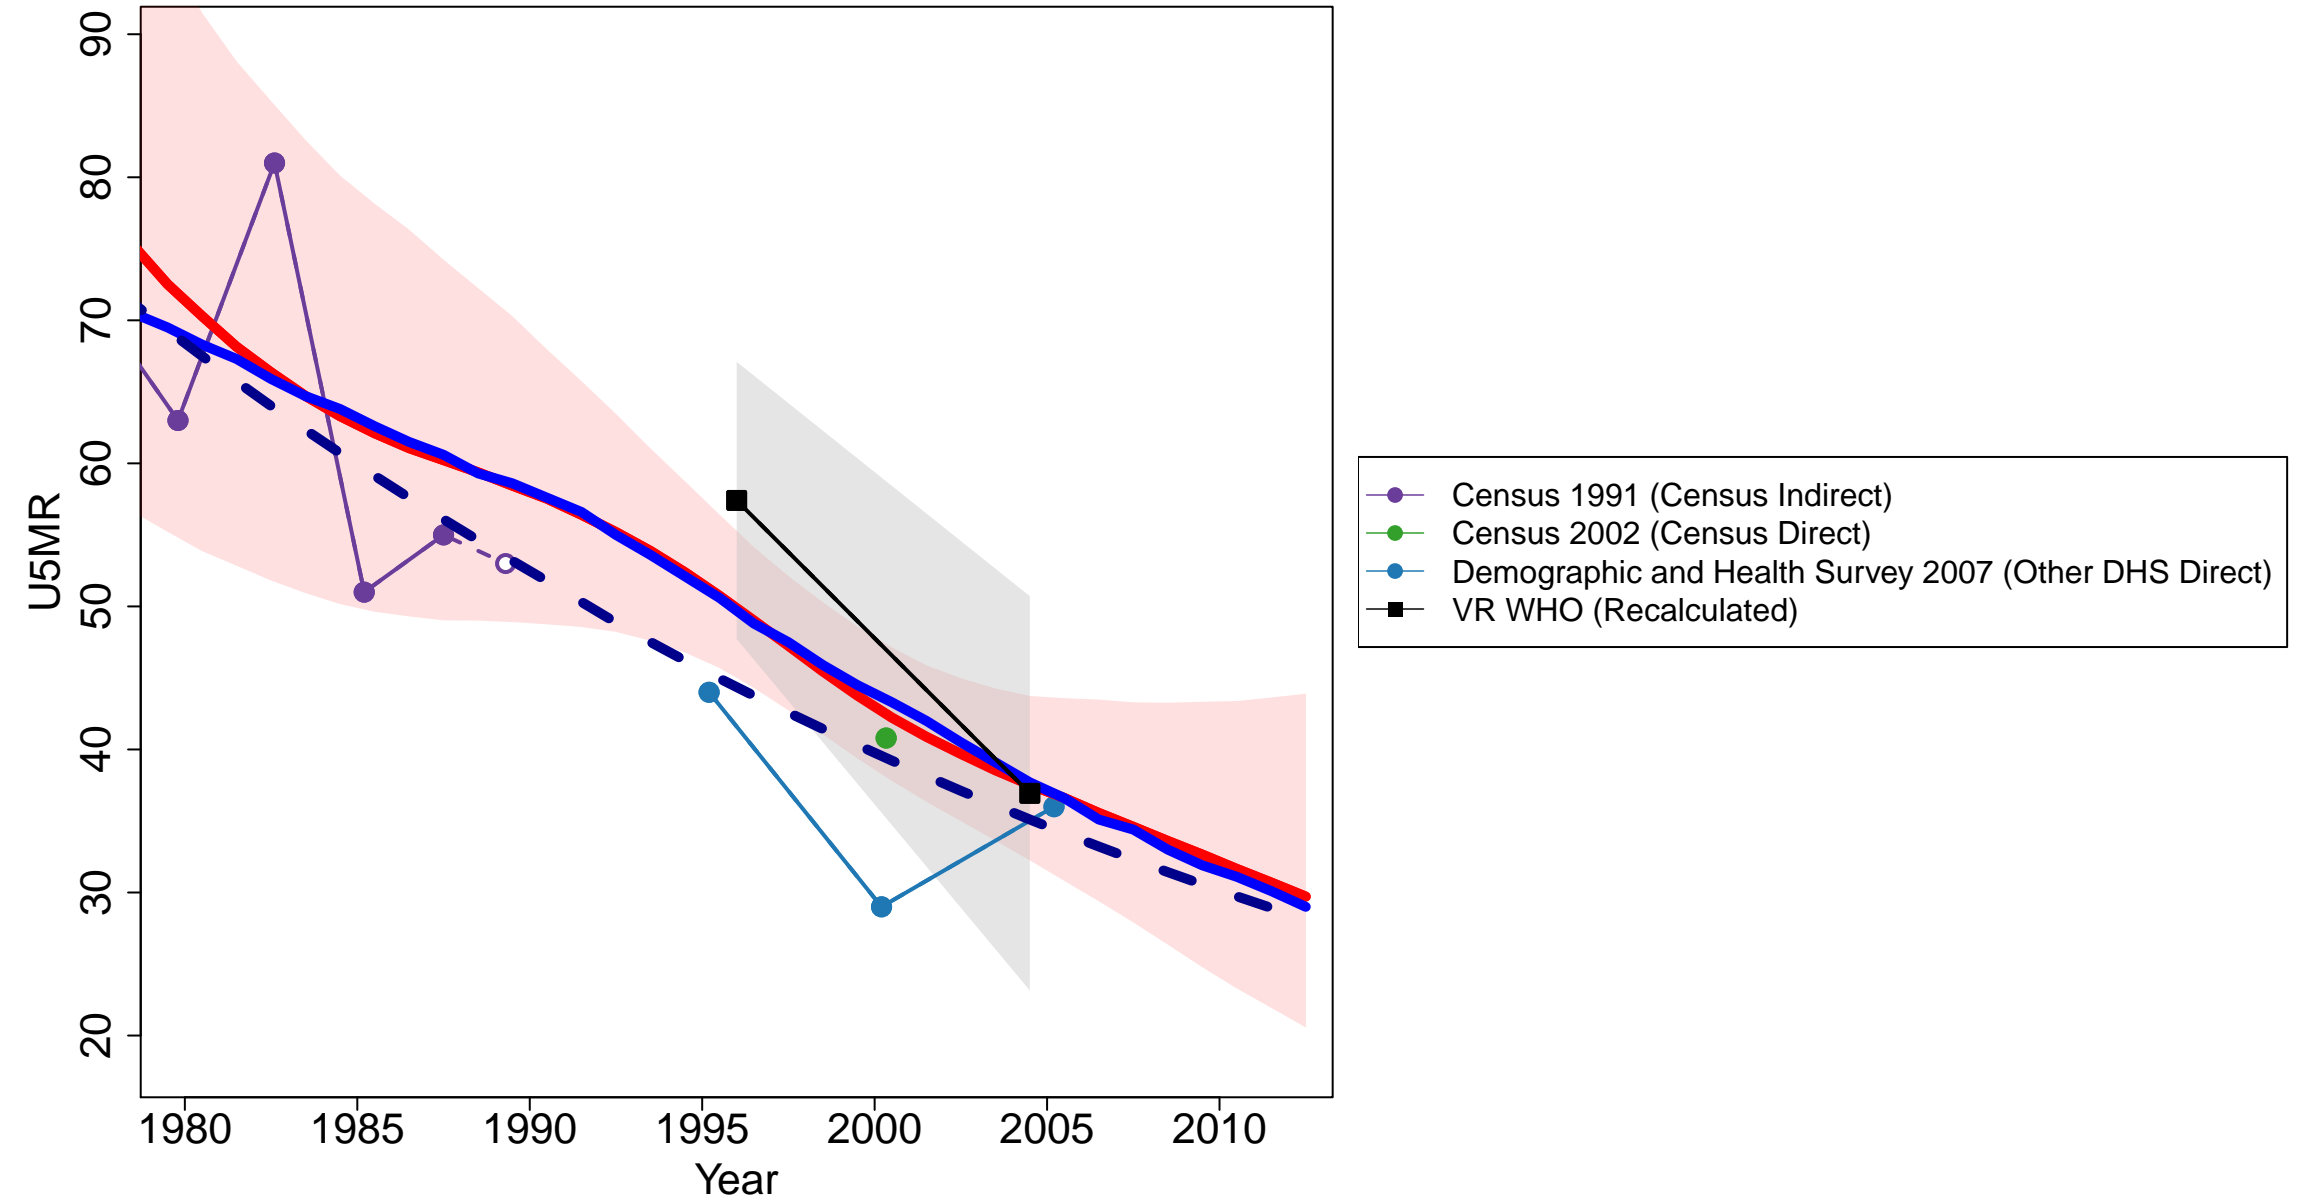

# Ukraine

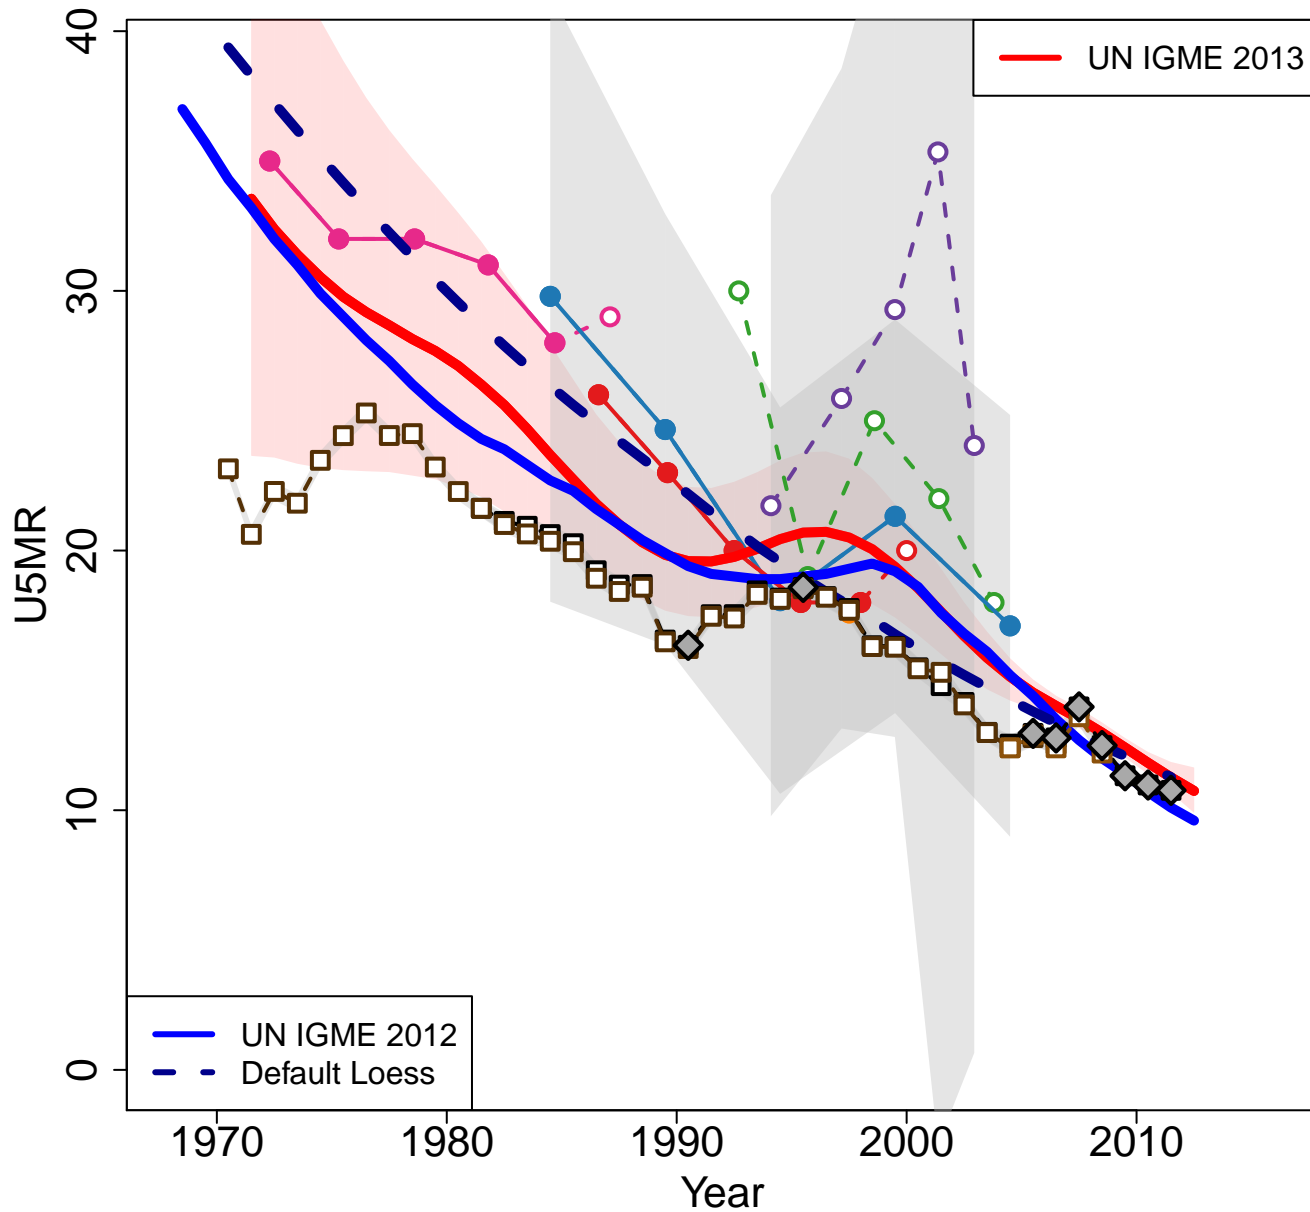

# Zoomed in

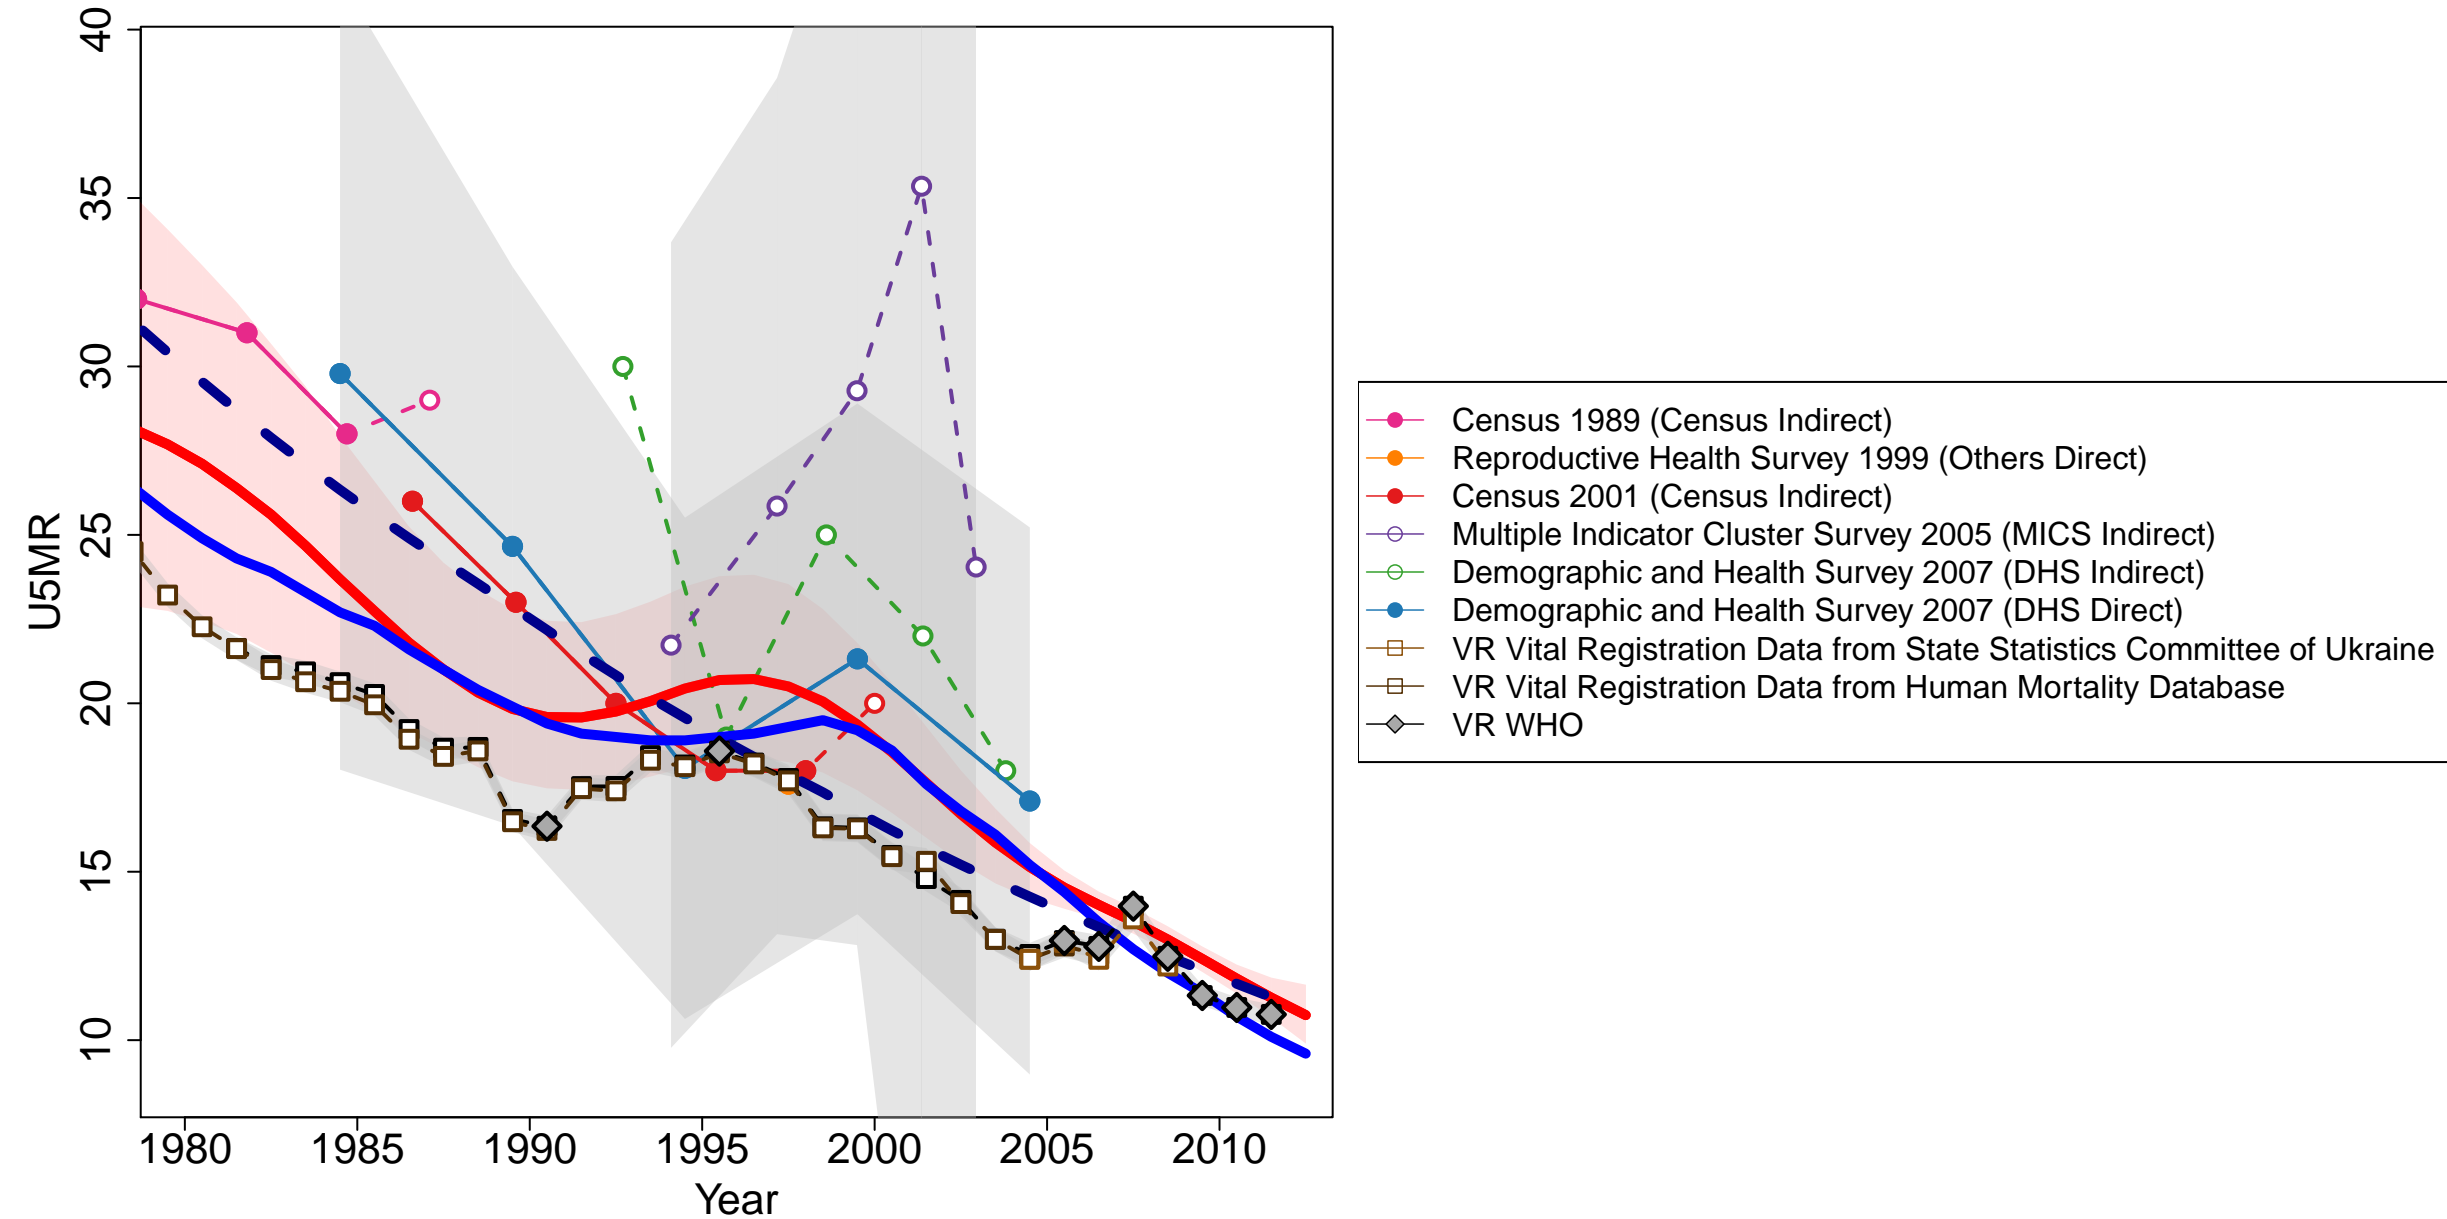

# United Arab Emirates

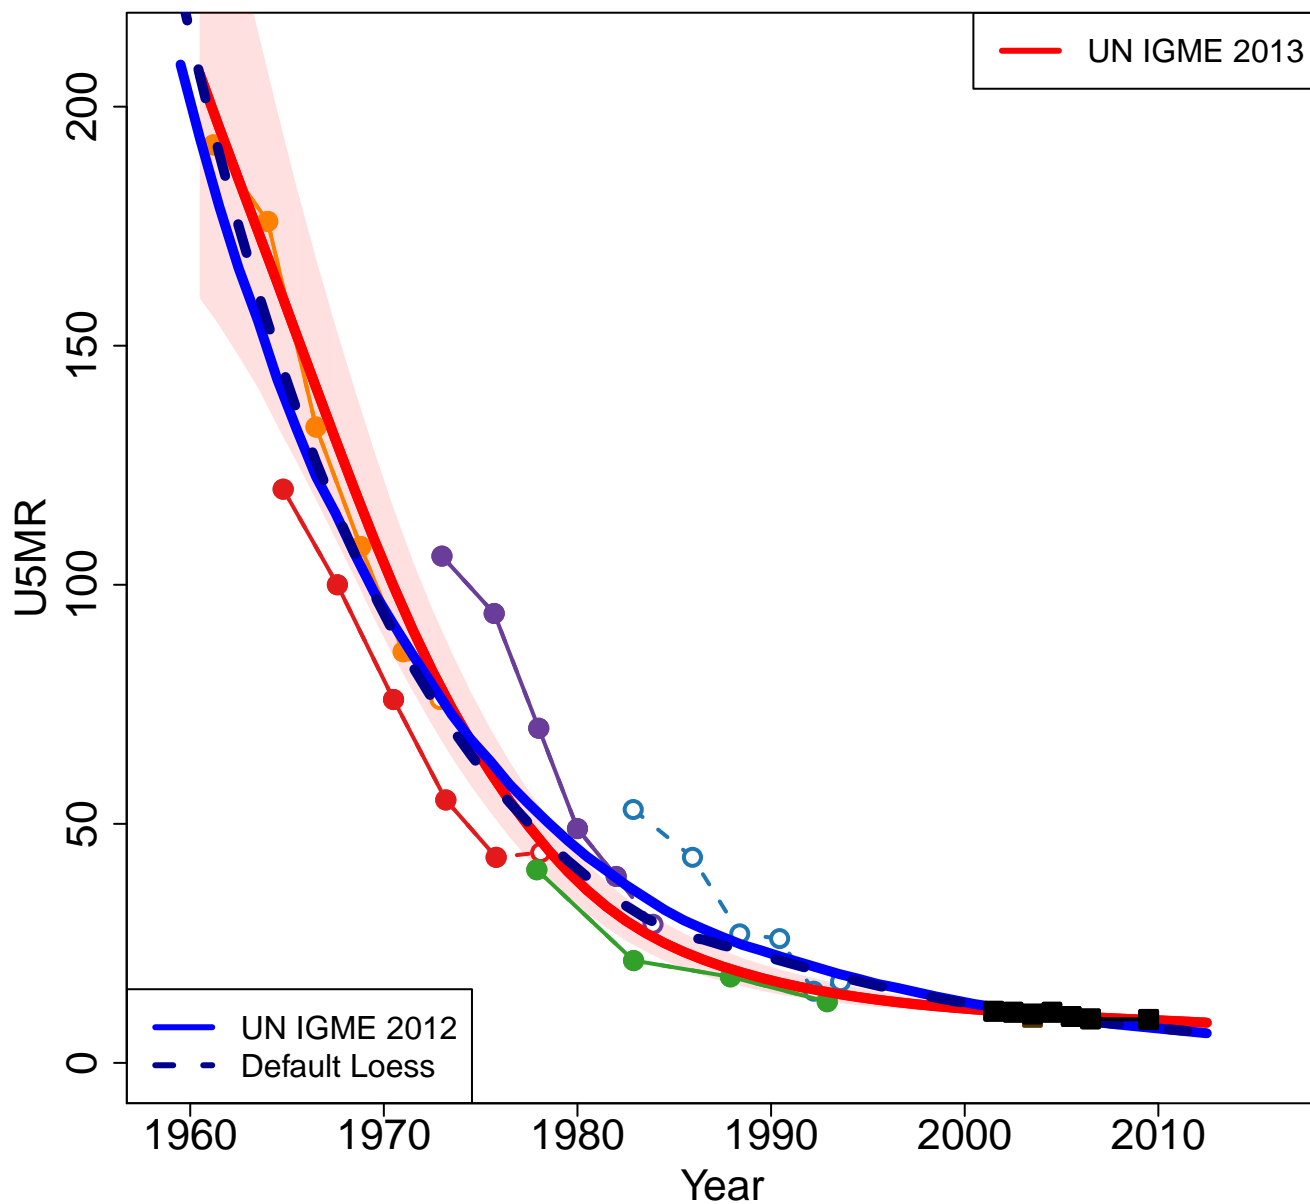

# Zoomed in

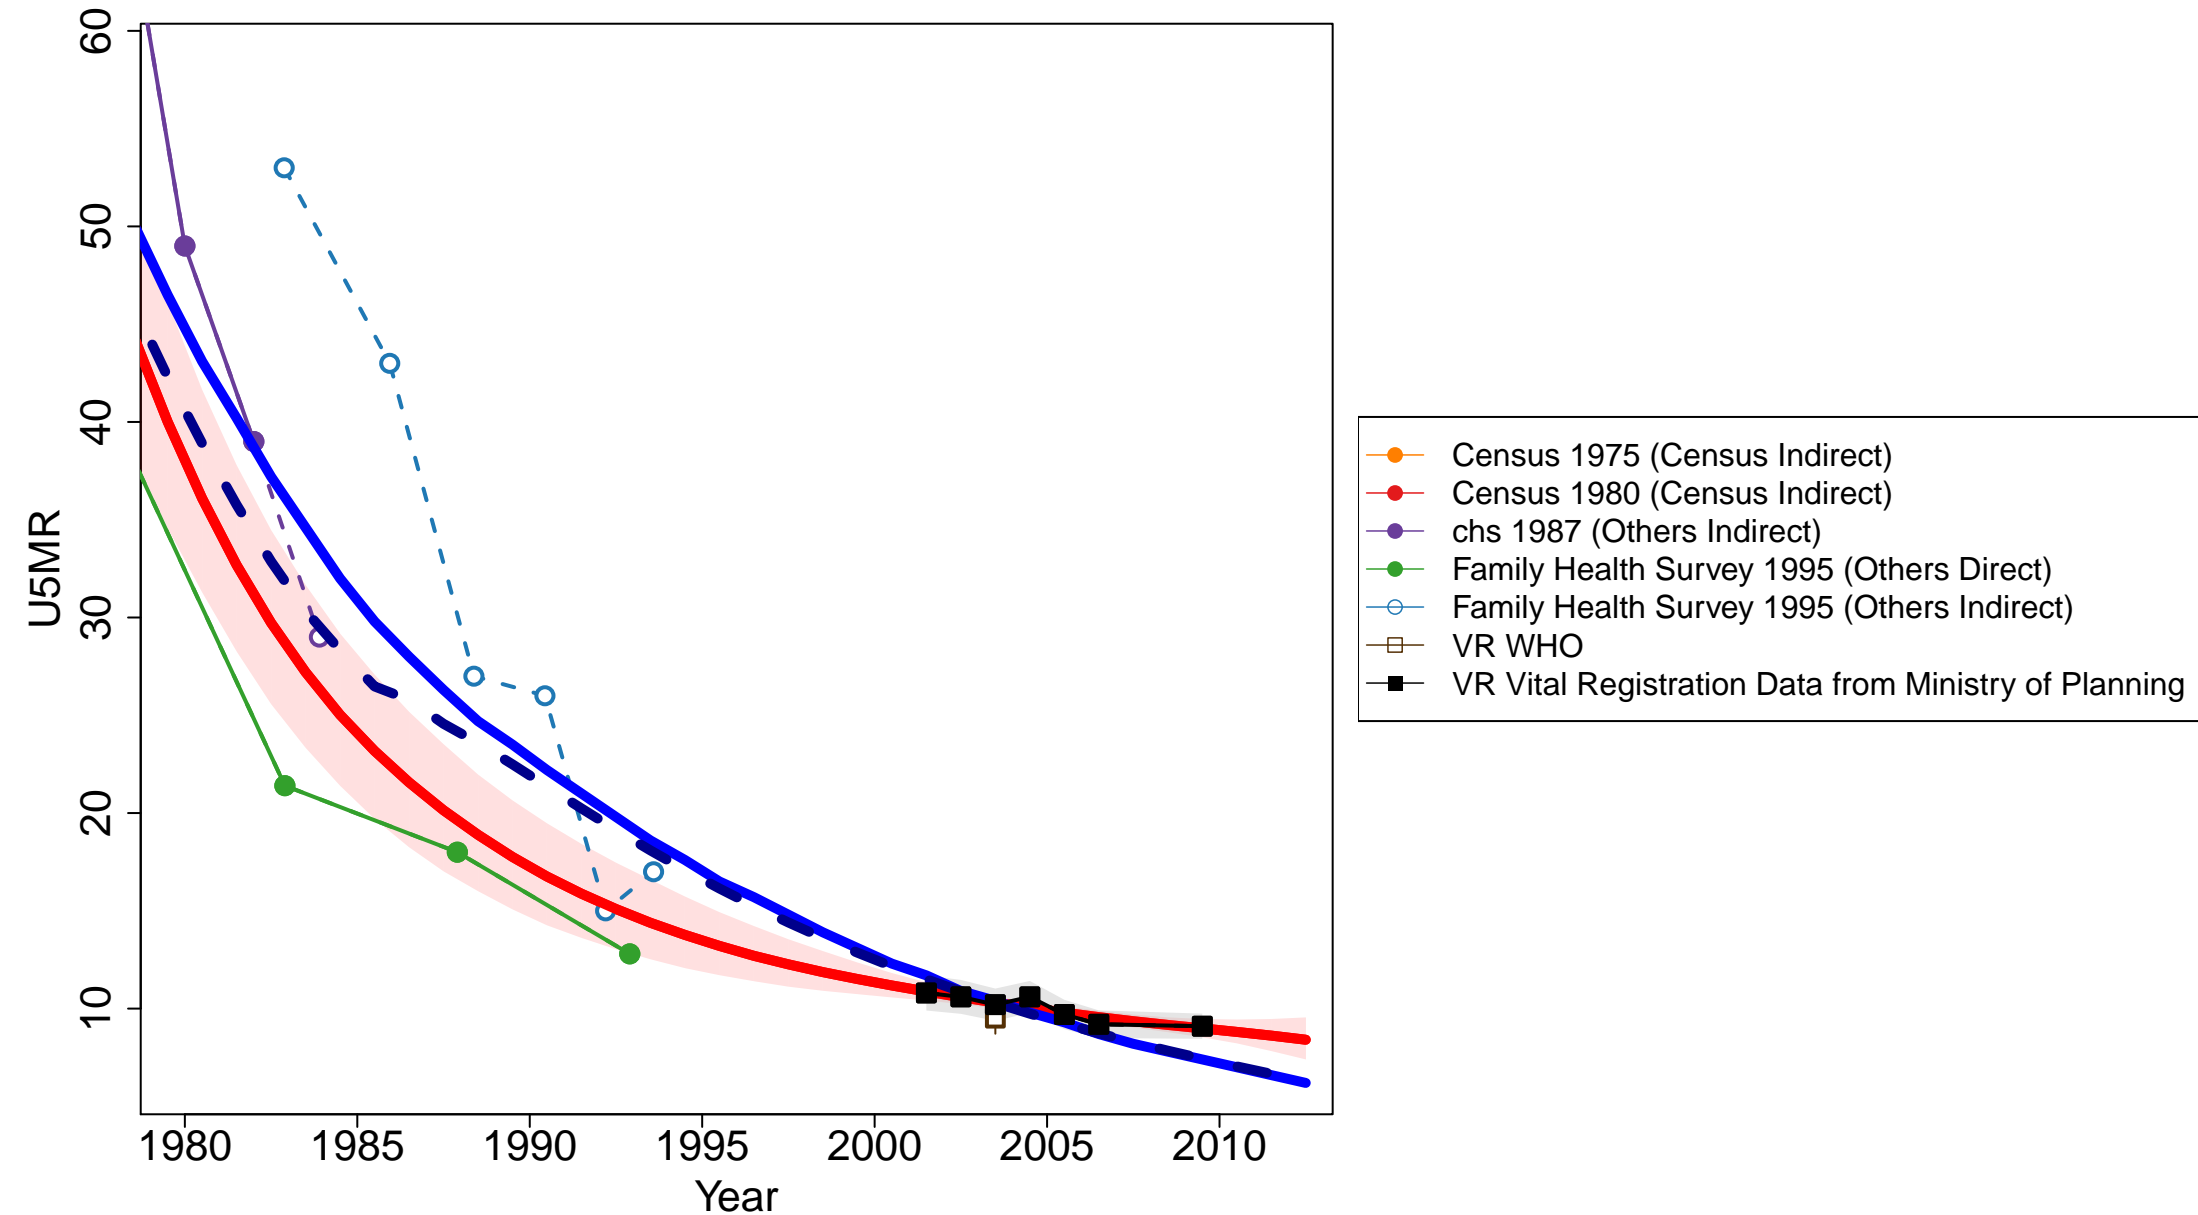

# Uruguay

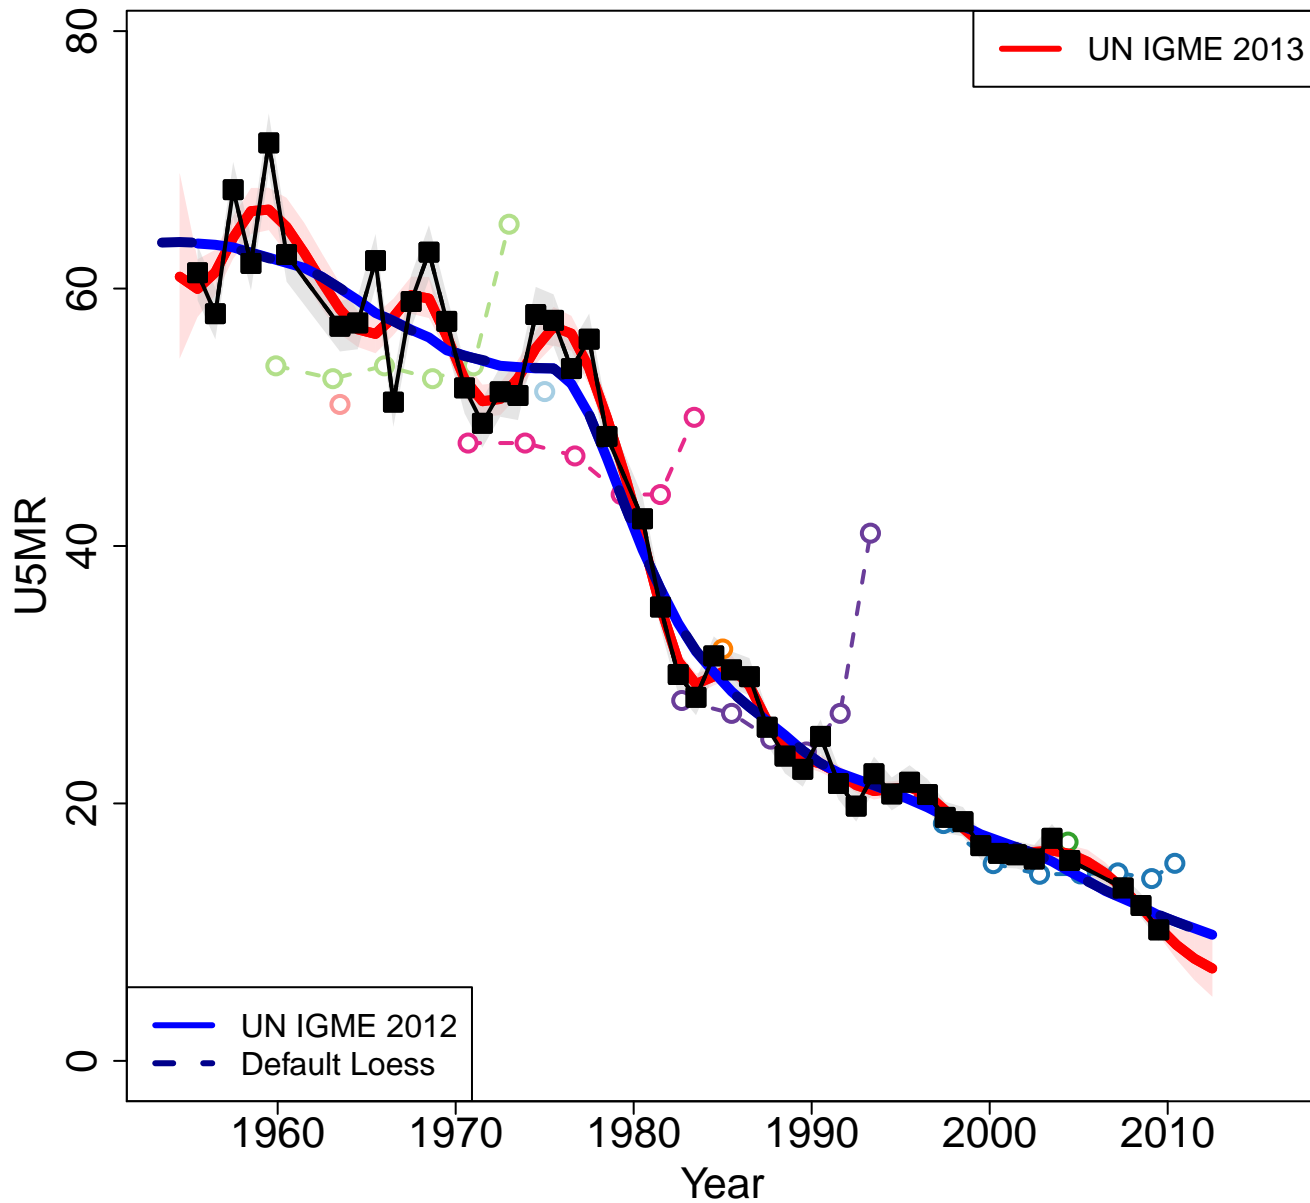

# Zoomed in

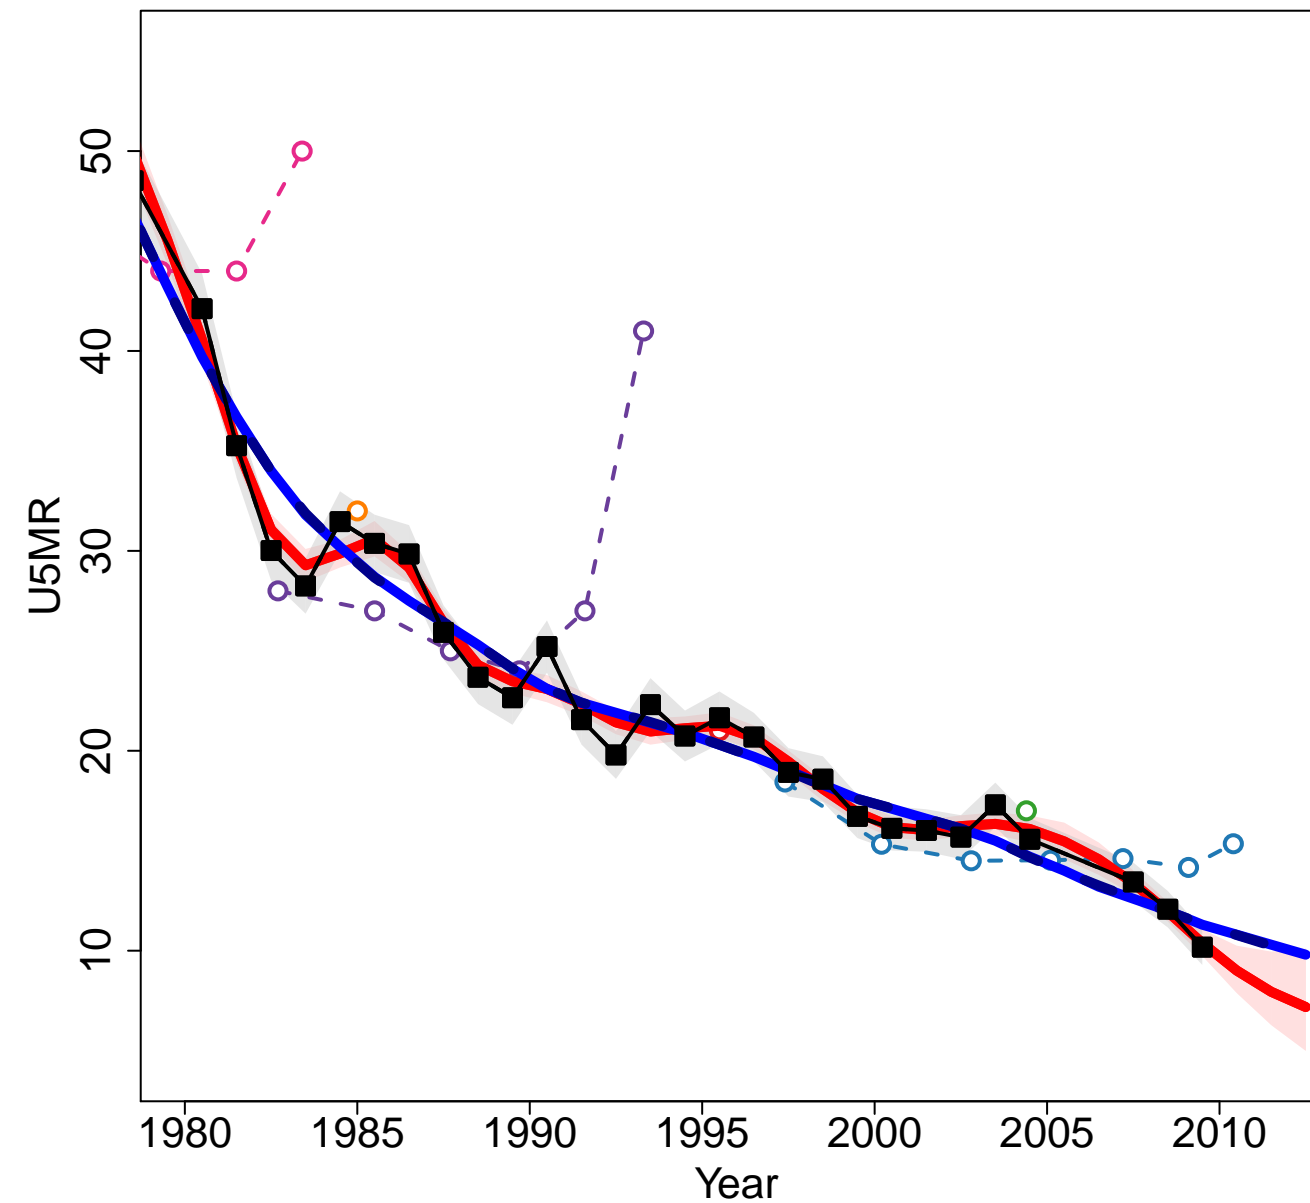

# Uzbekistan

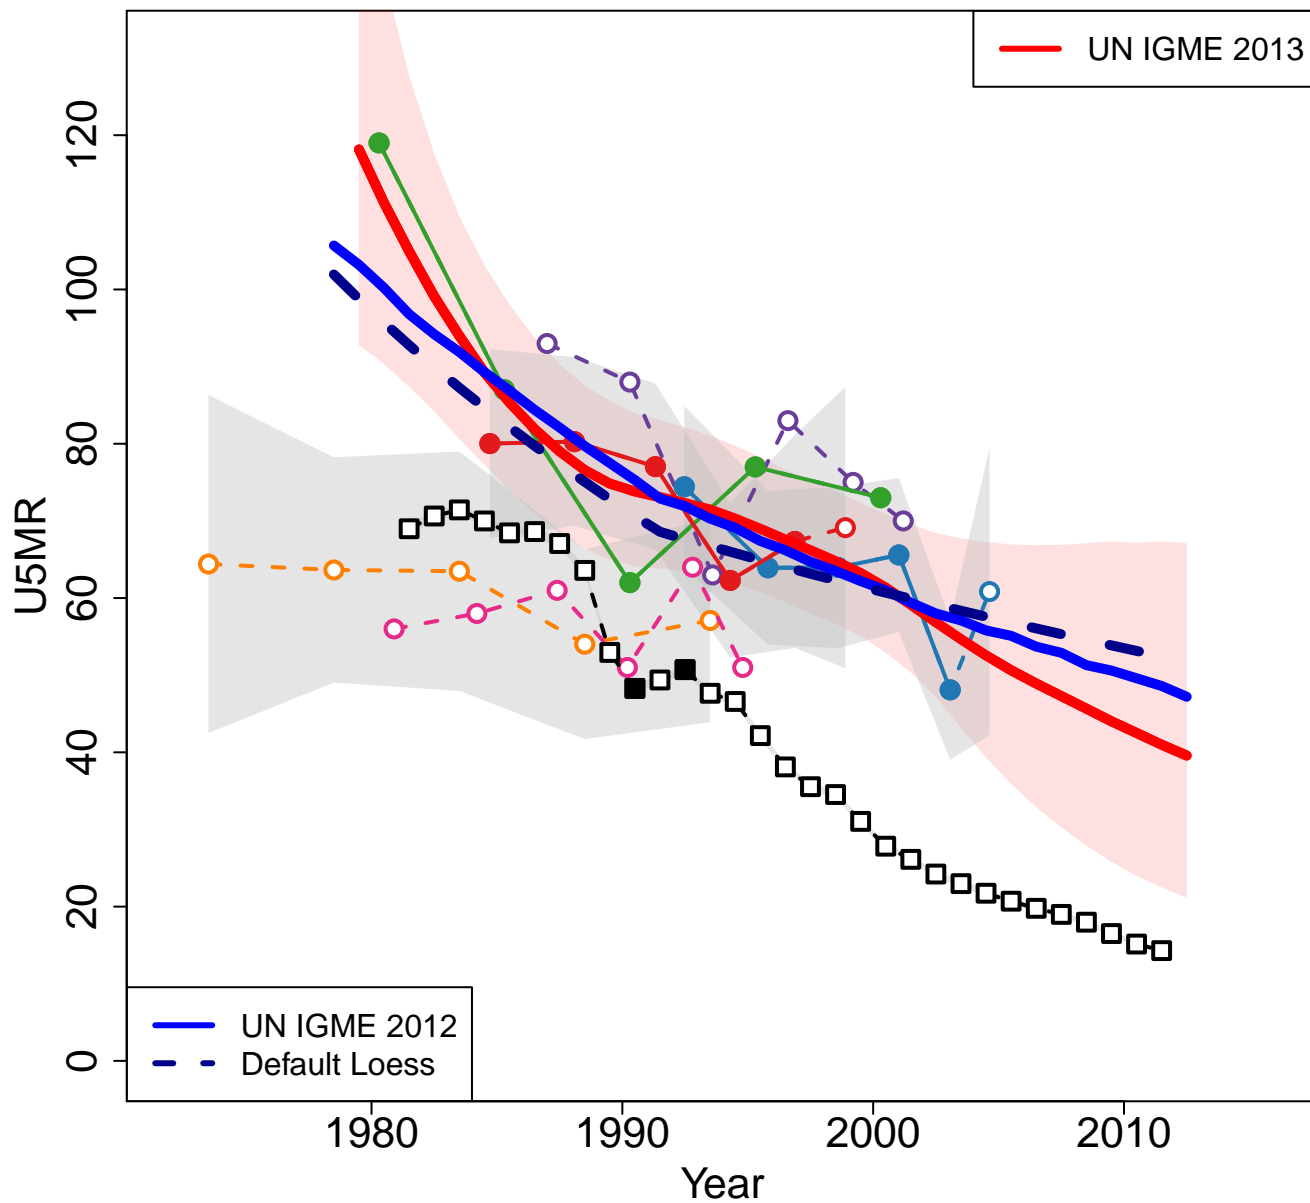

# Zoomed in

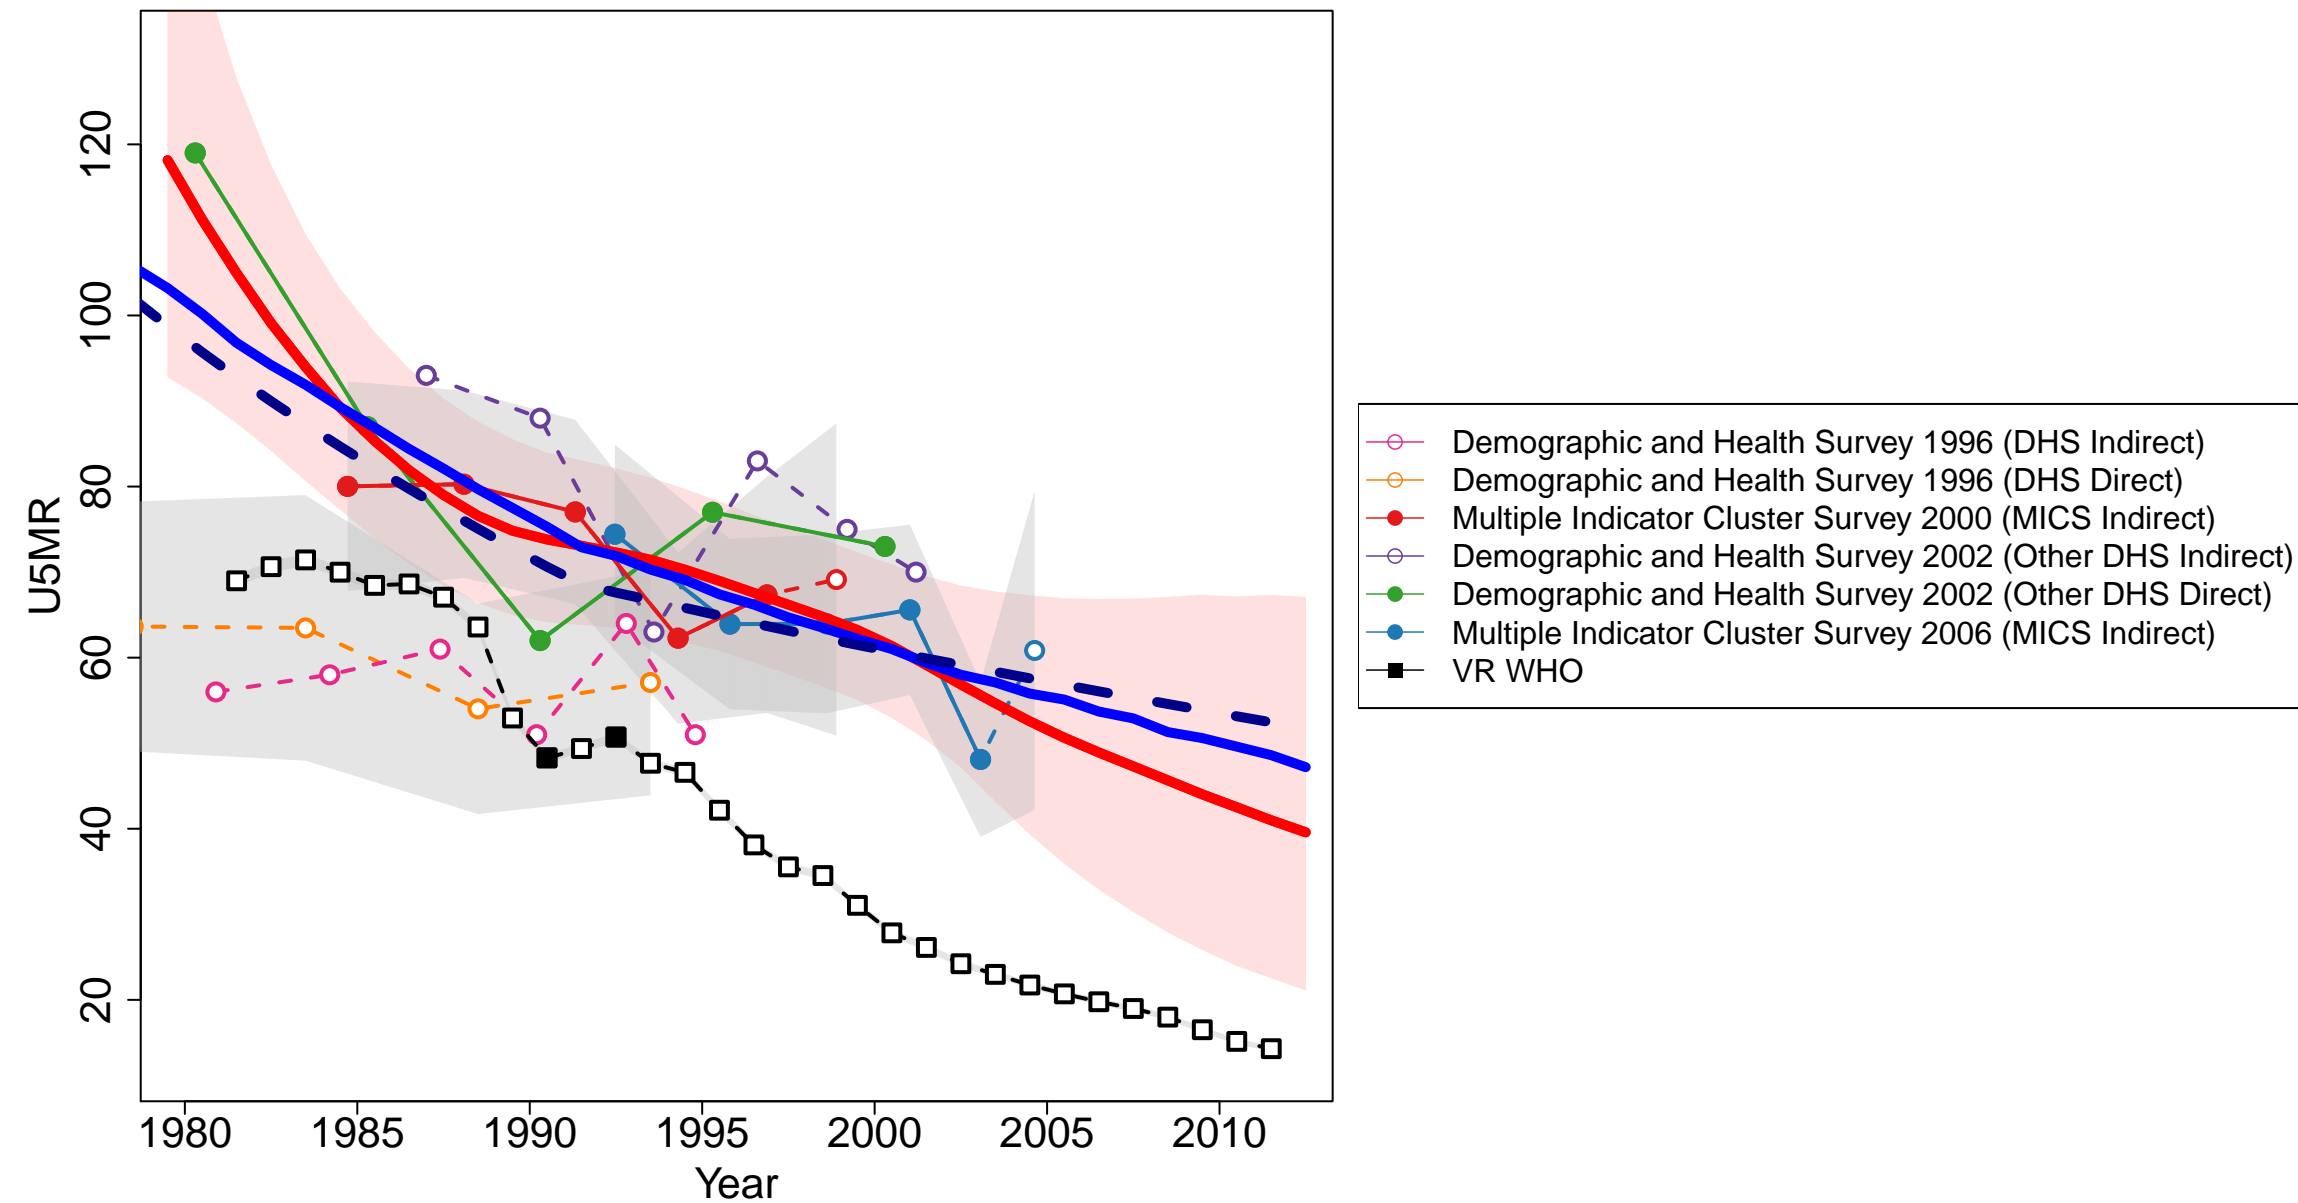

# Vanuatu

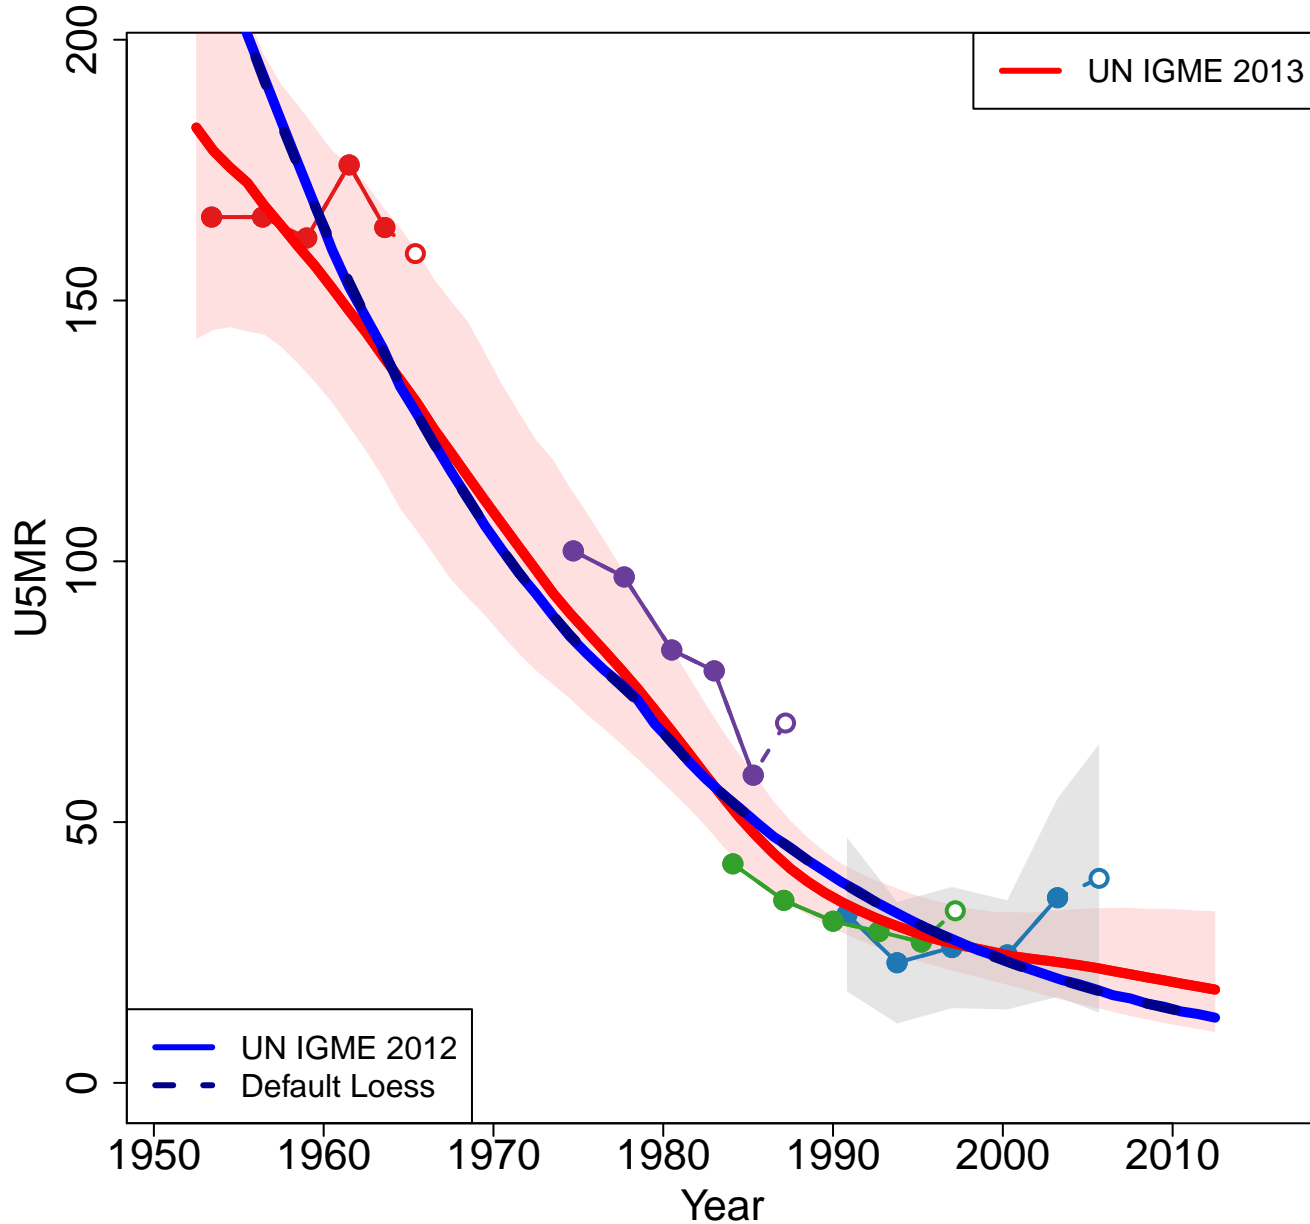

# Zoomed in

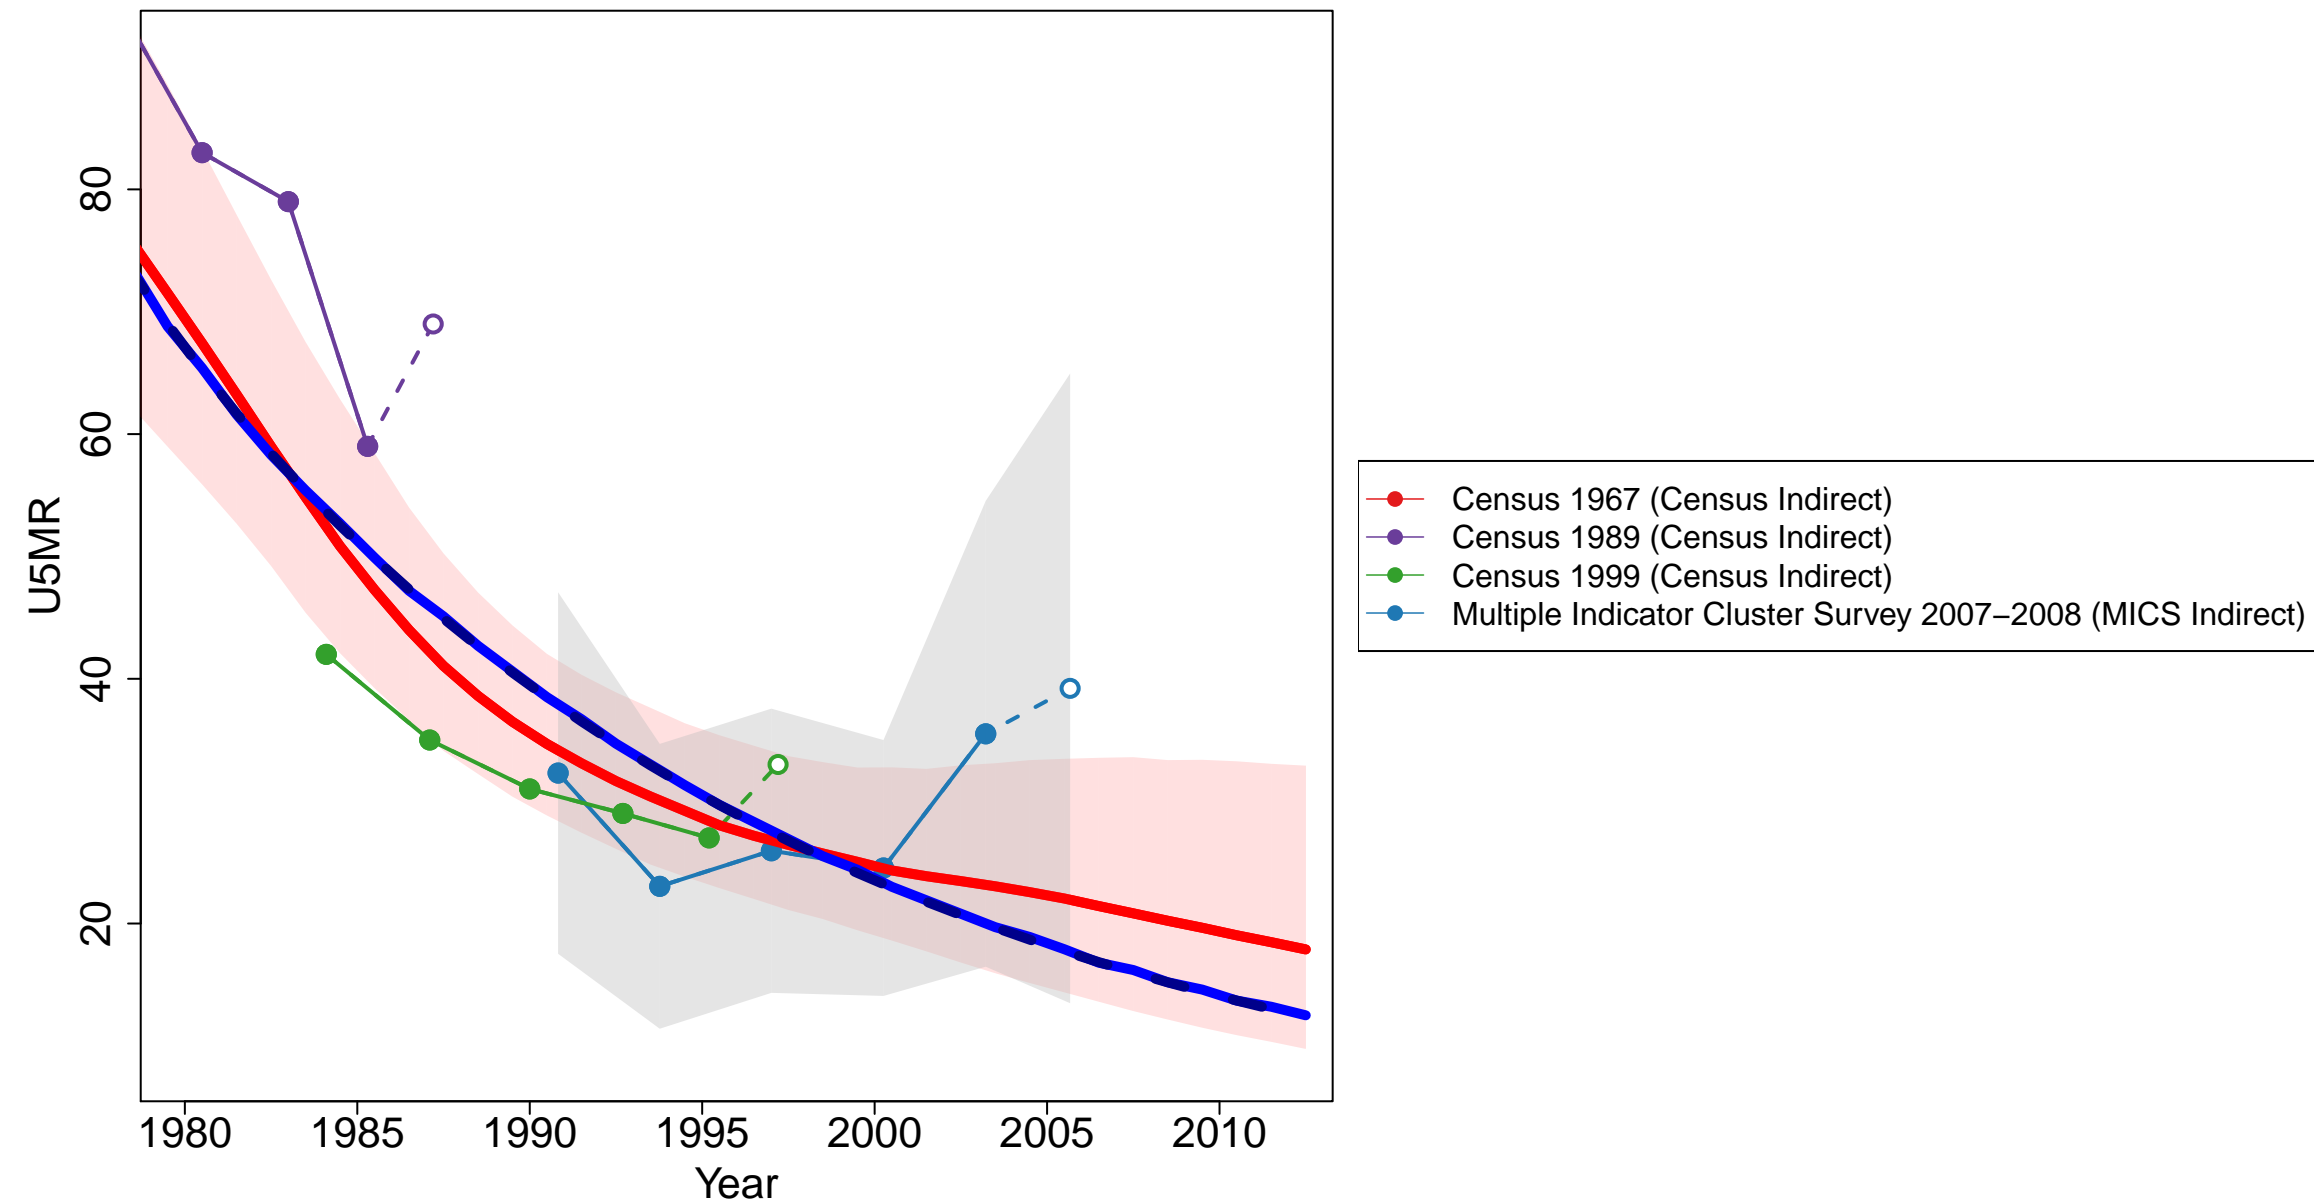



# Venezuela

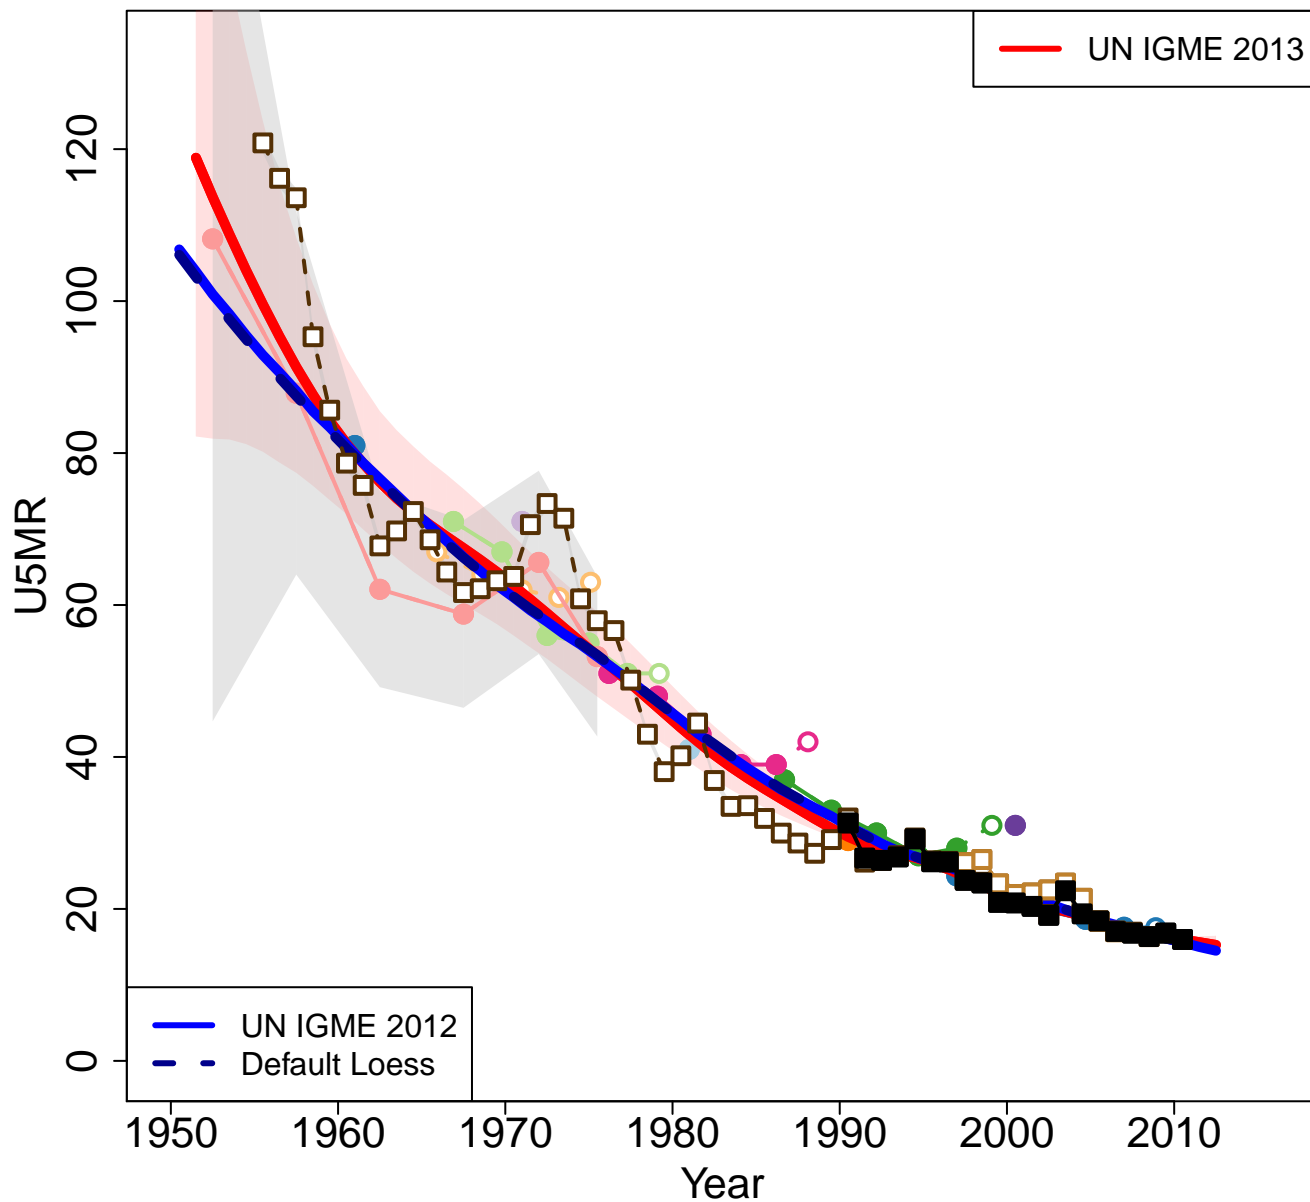

# Zoomed in

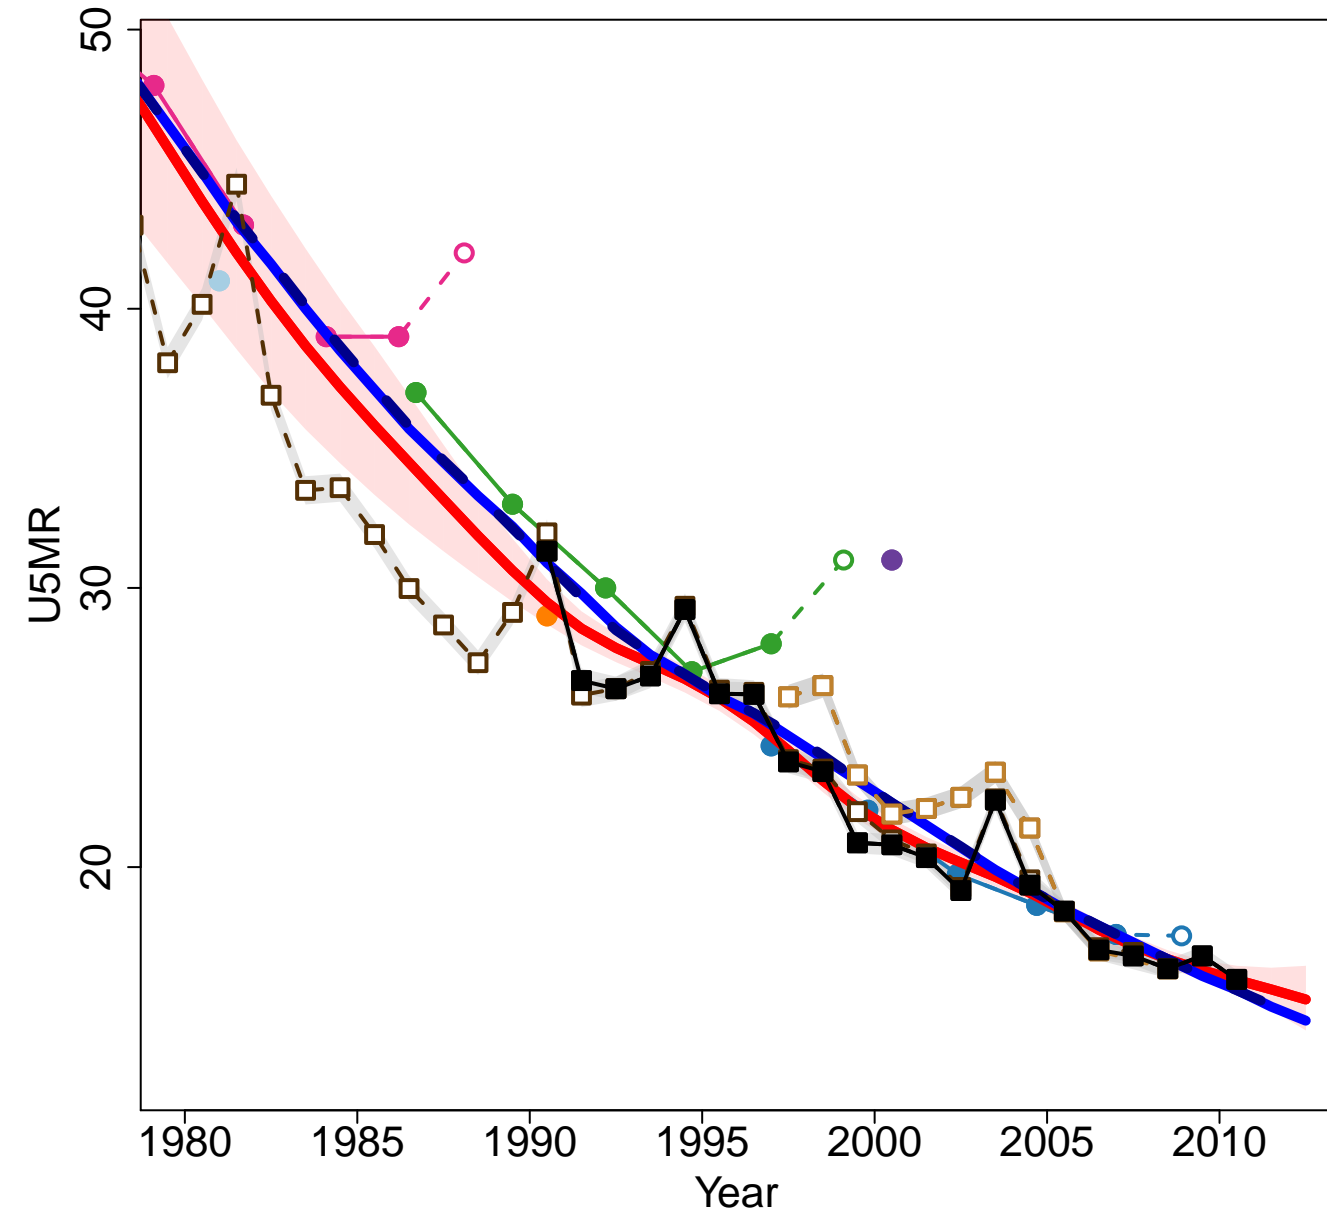

# Vietnam

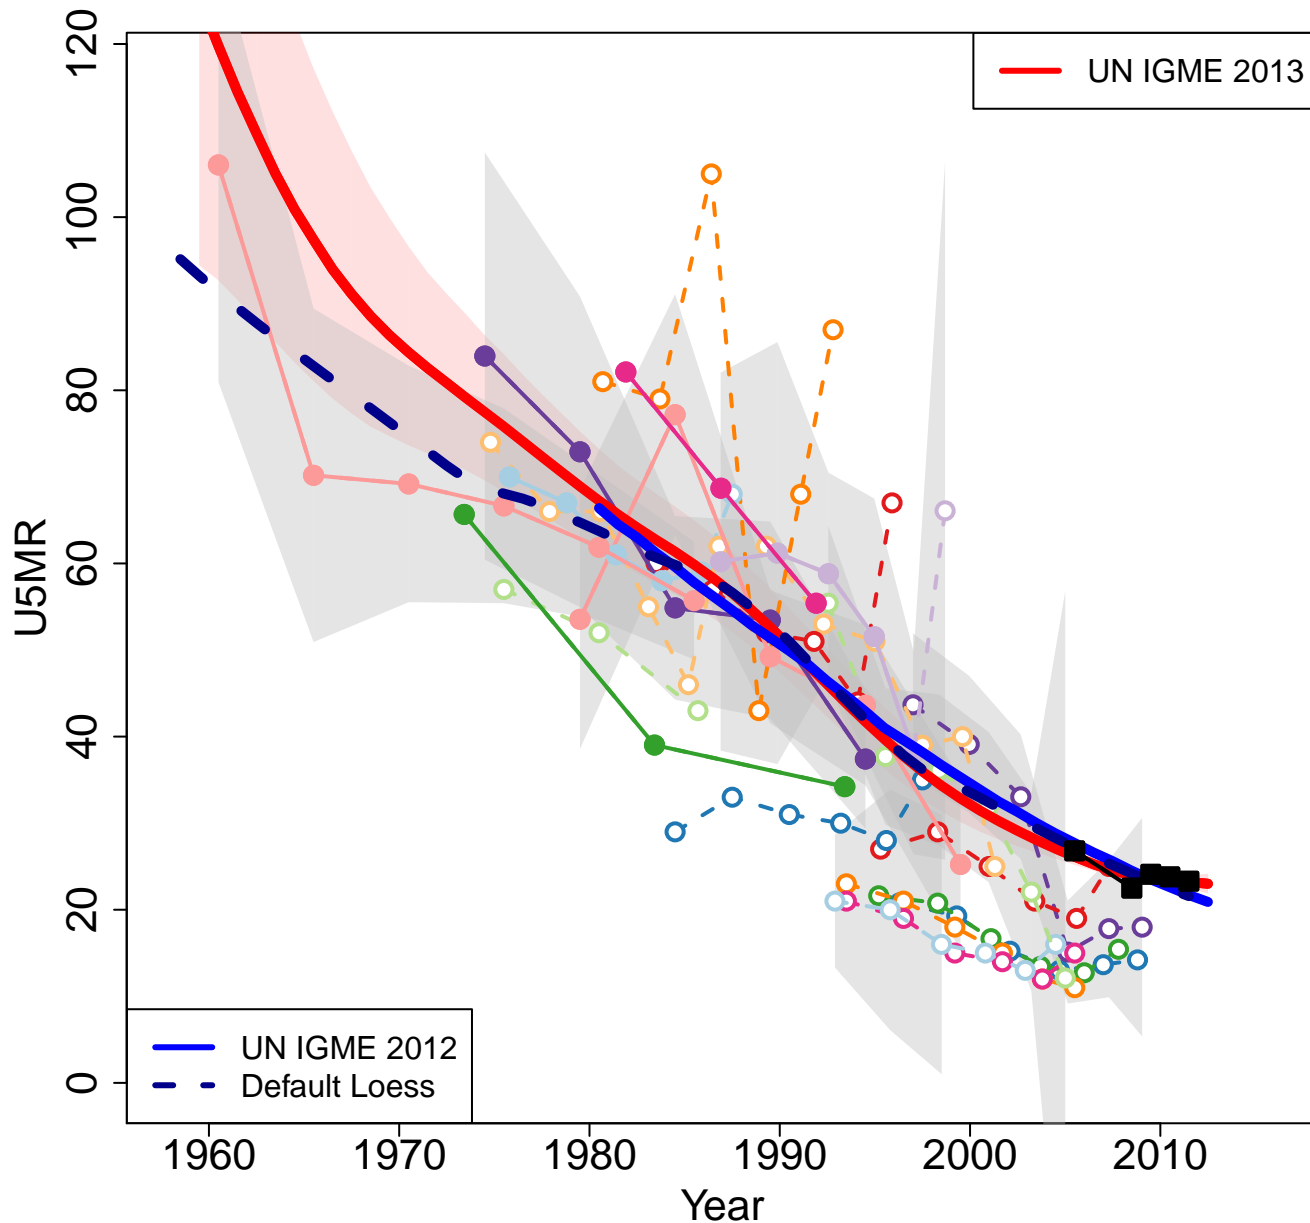

# Zoomed in

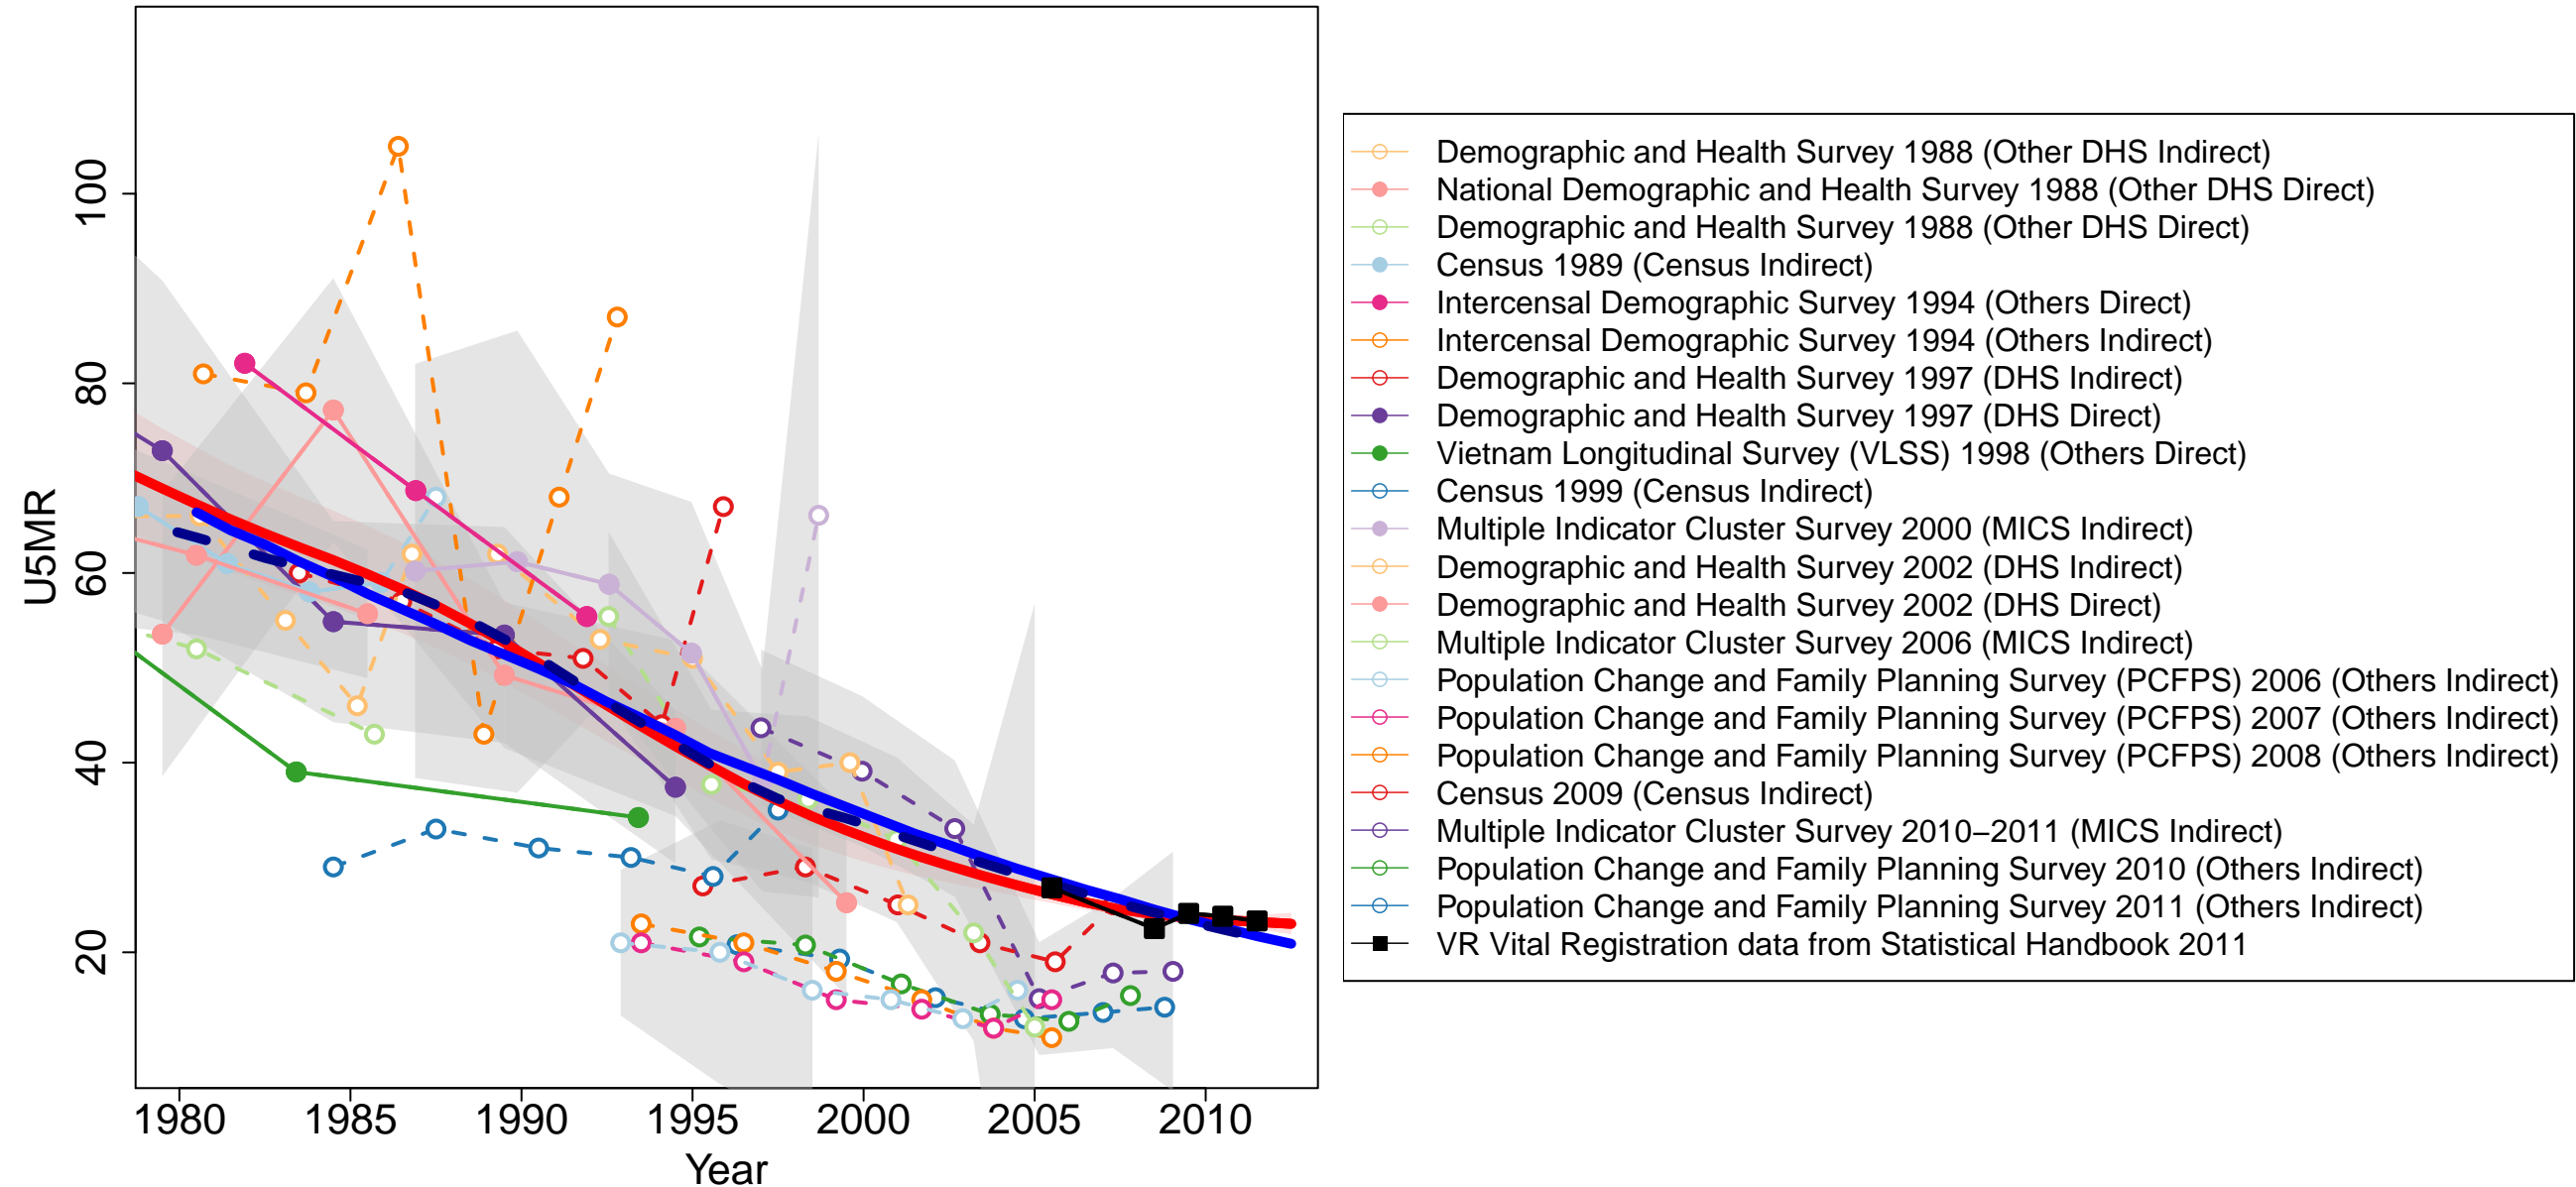

# Yemen

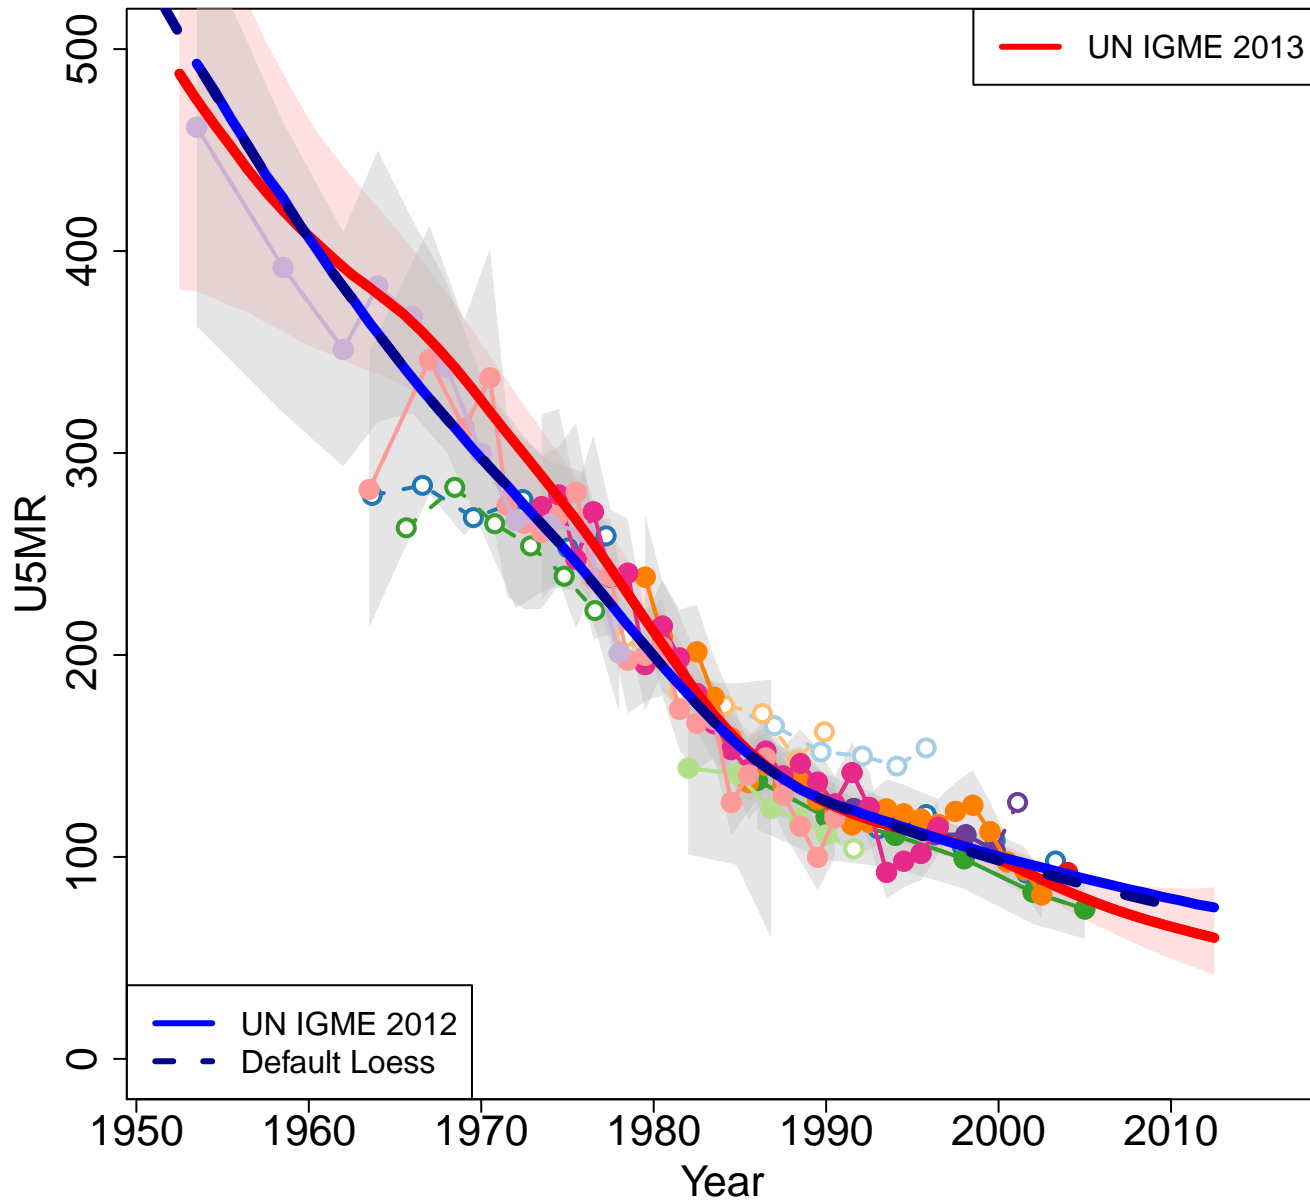

# Zoomed in

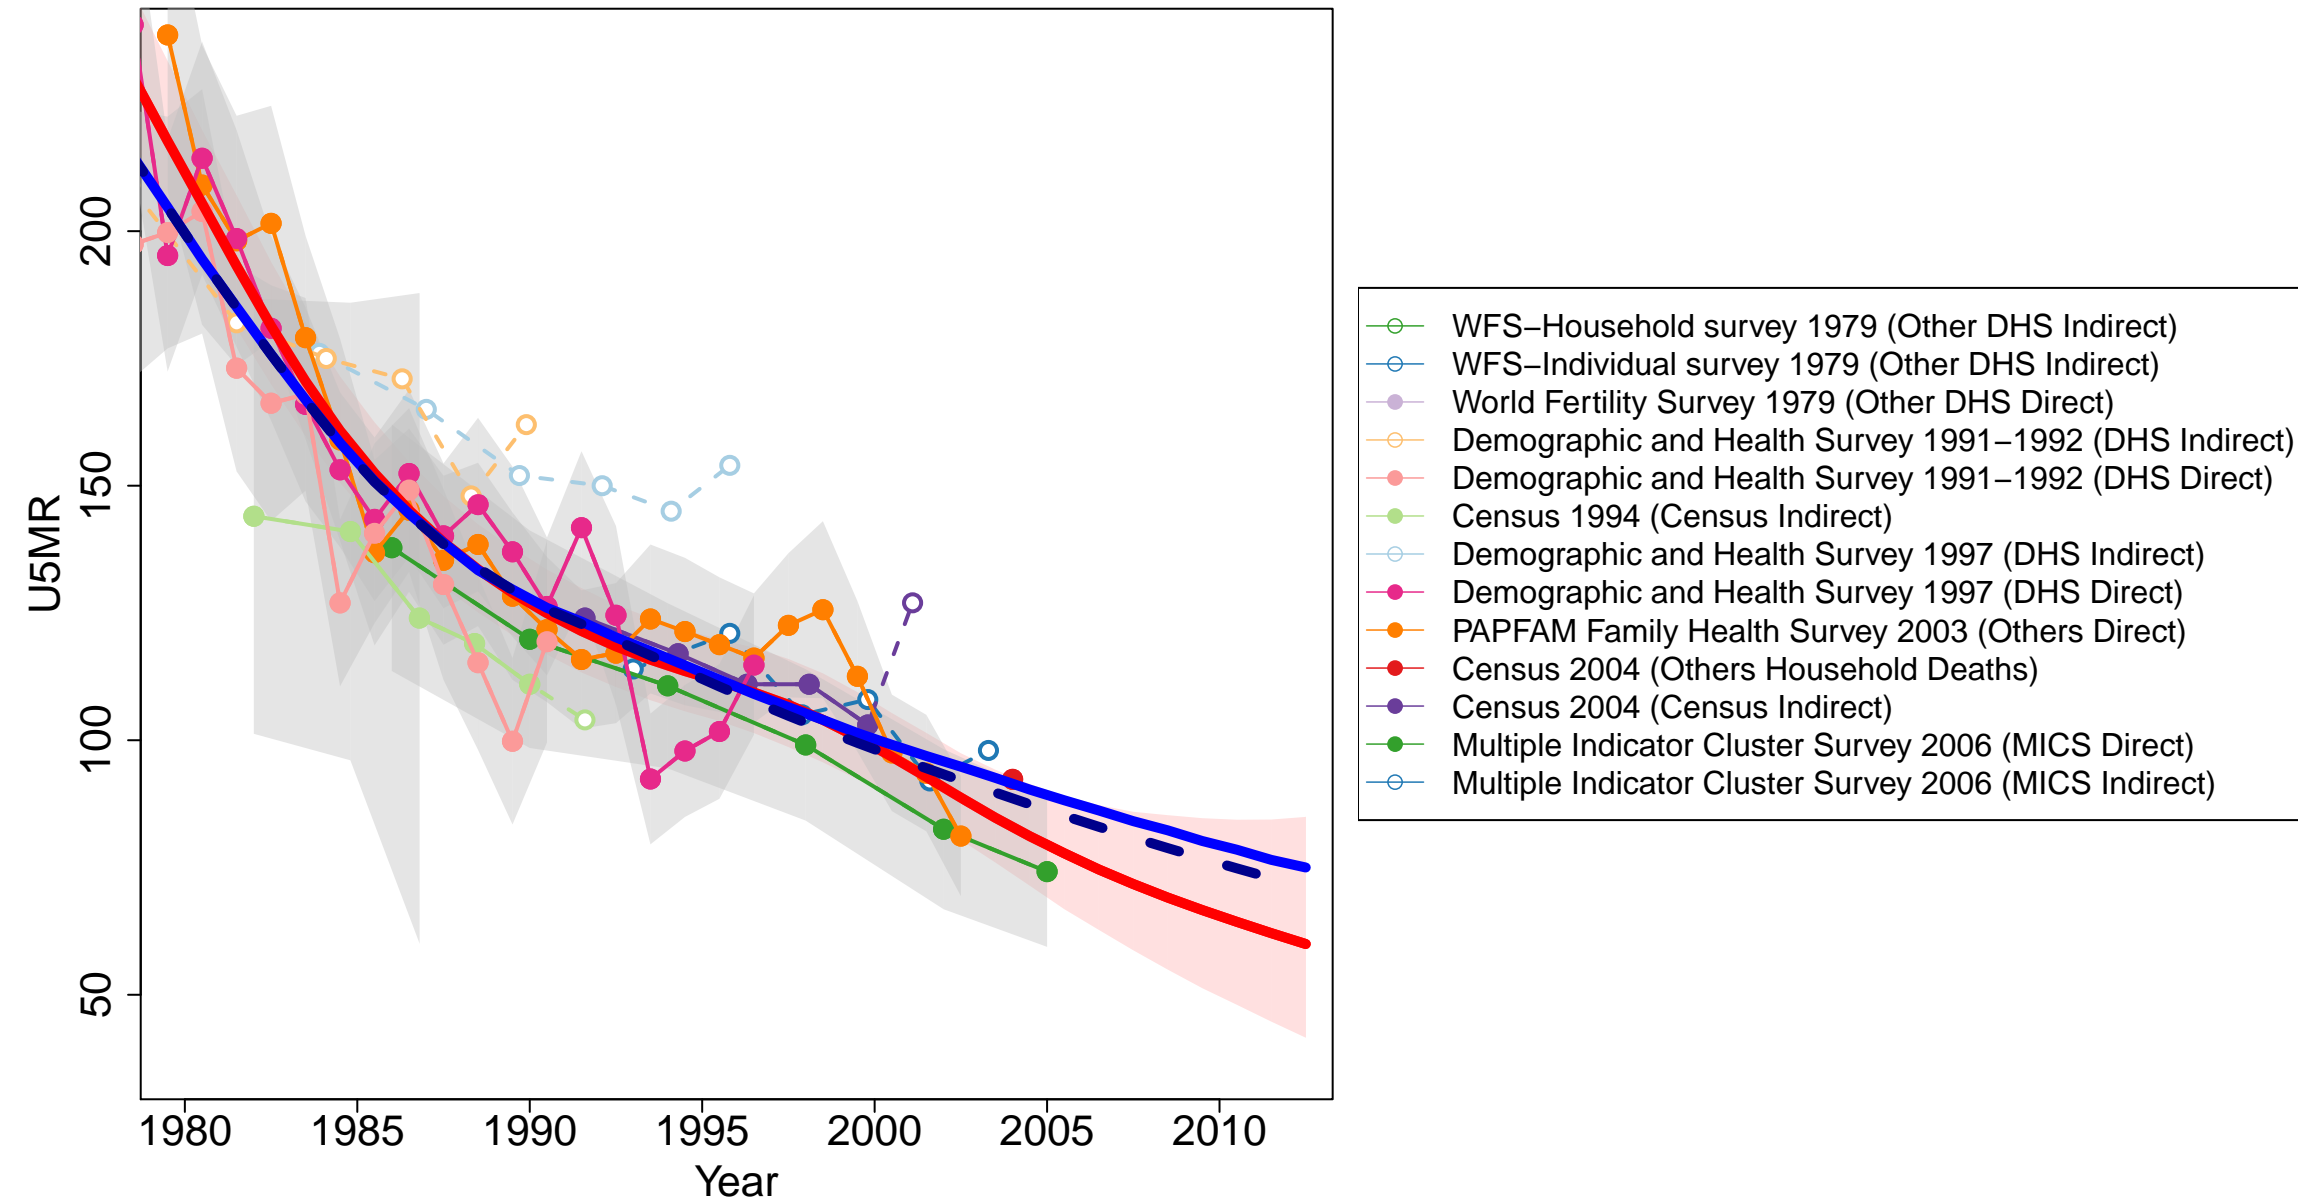

Figure 1 is a line graph showing the evolution of the global mean annual concentration of atmospheric methane (ppb) from 1960 to 2013. The x-axis represents the Year (1960 to 2010), and the y-axis represents the Methane concentration (ppb) (1500 to 2000). The graph includes data from UN IGME 2012 (solid blue line), UN IGME 2013 (solid red line), and a Default Loess fit (dashed blue line). It also shows various other data series: pink circles, green circles, brown squares, black squares, and blue circles, some connected by dashed lines. A shaded red area indicates a confidence interval around the 2013 data.

# Australia

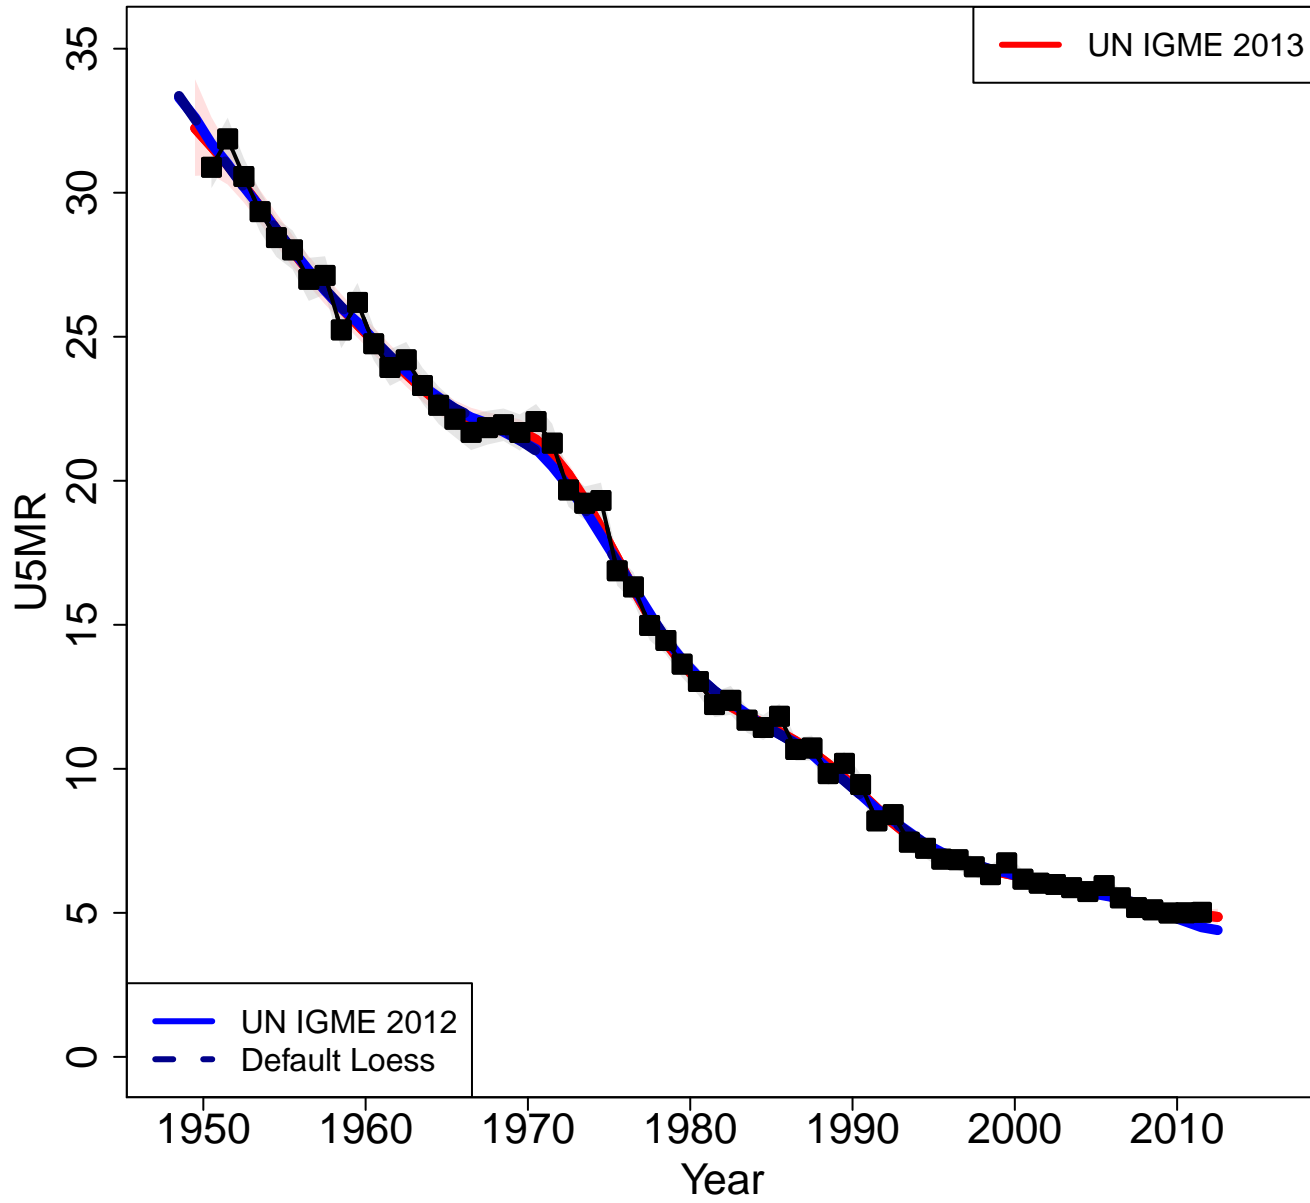

# Zoomed in

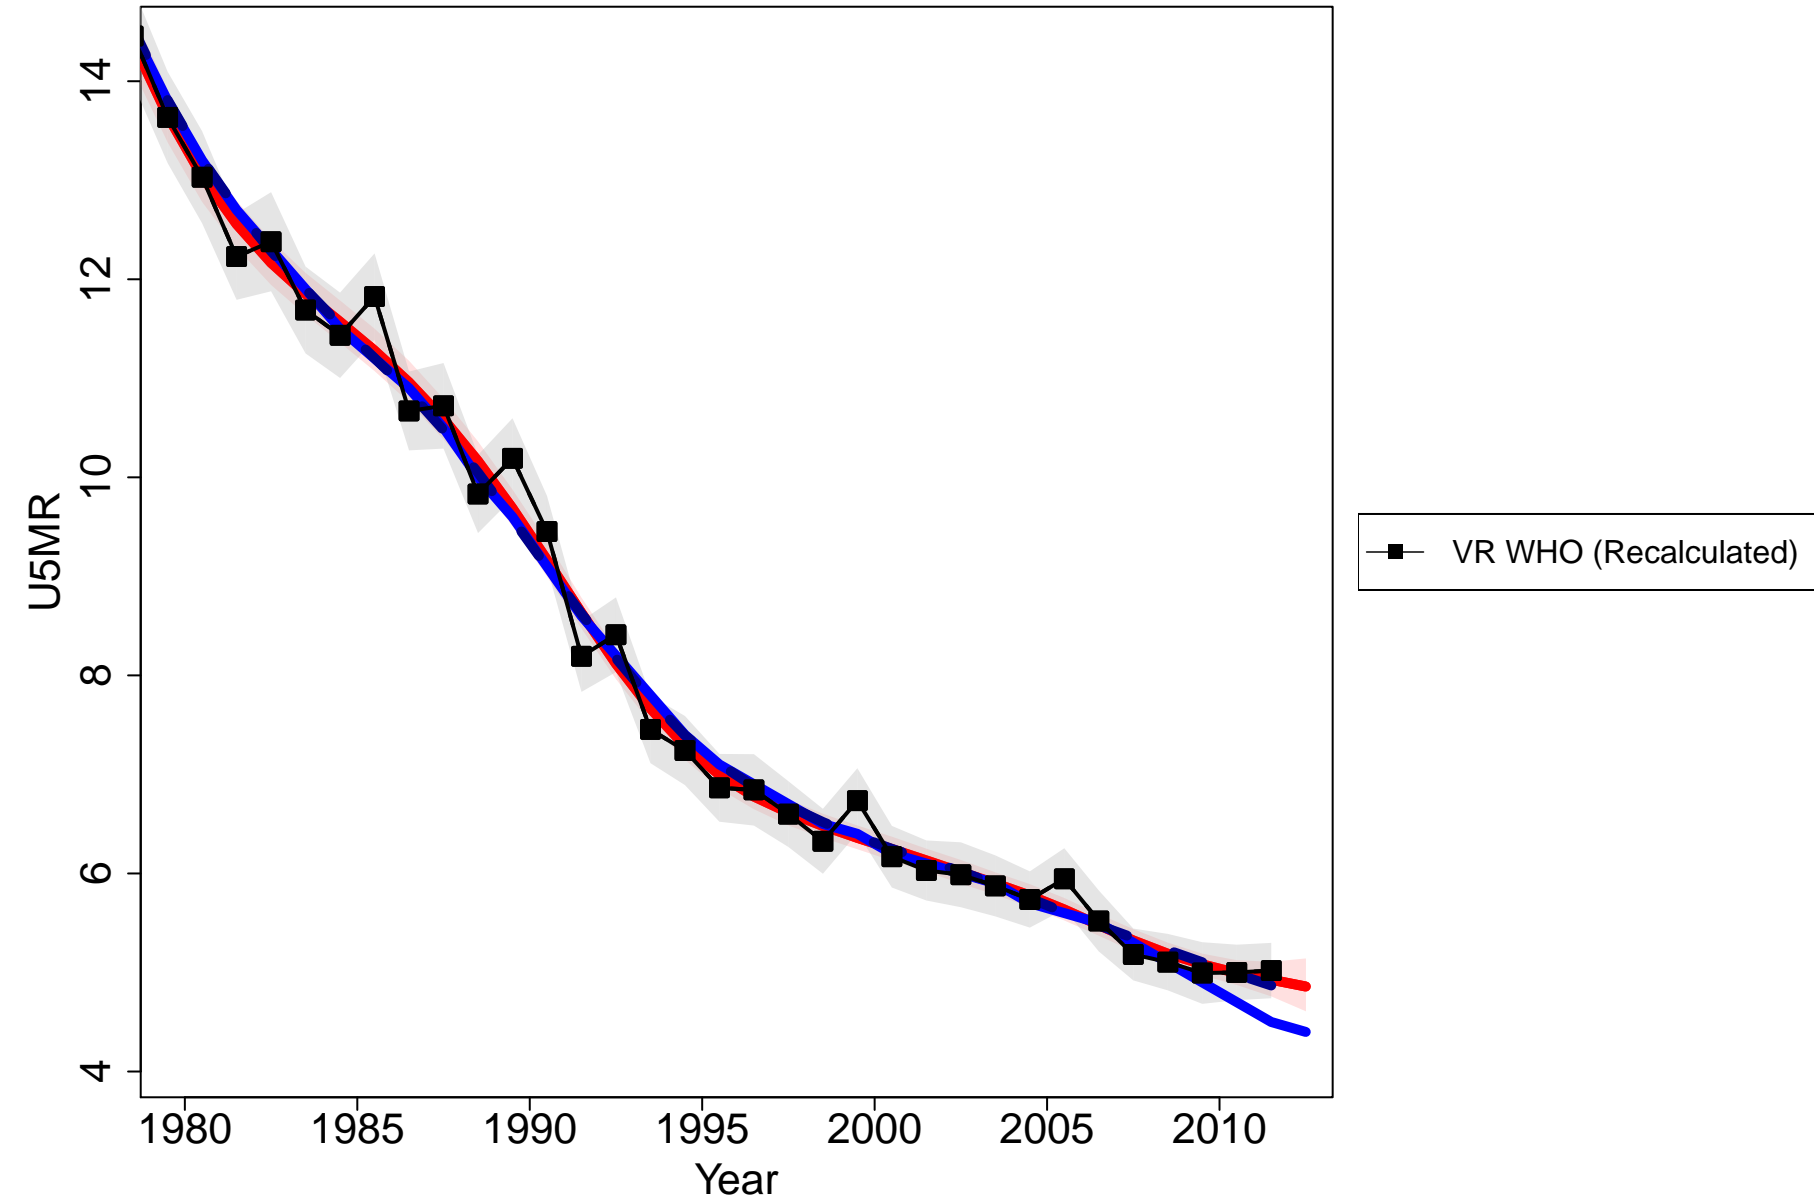

# Austria

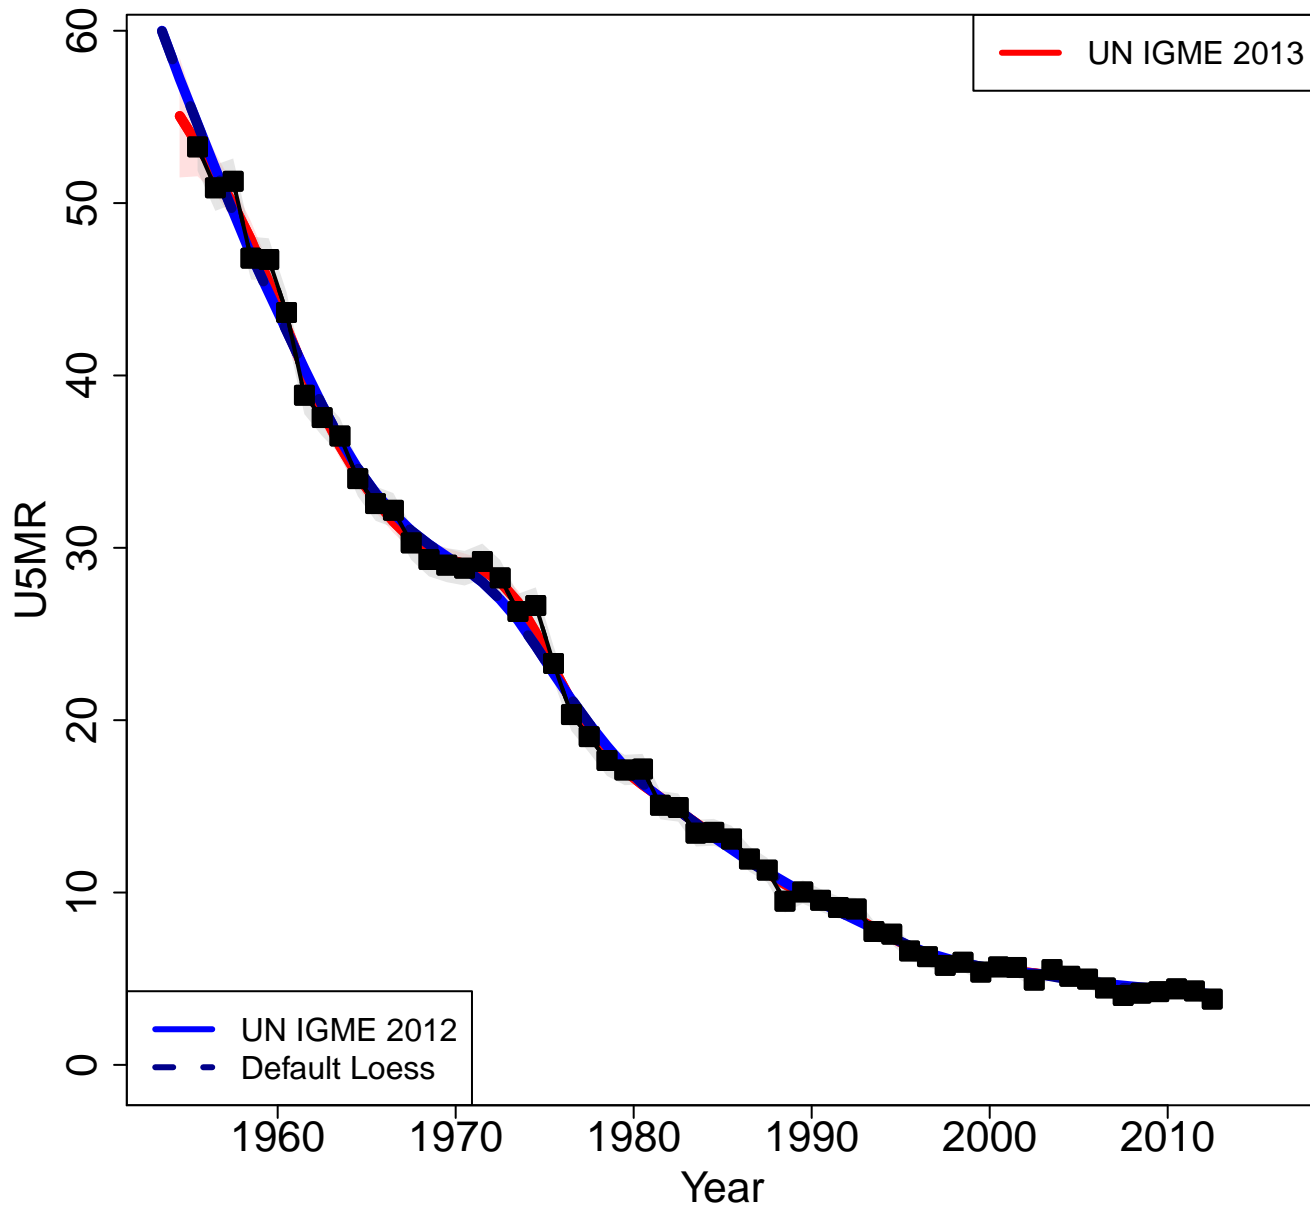

# Zoomed in

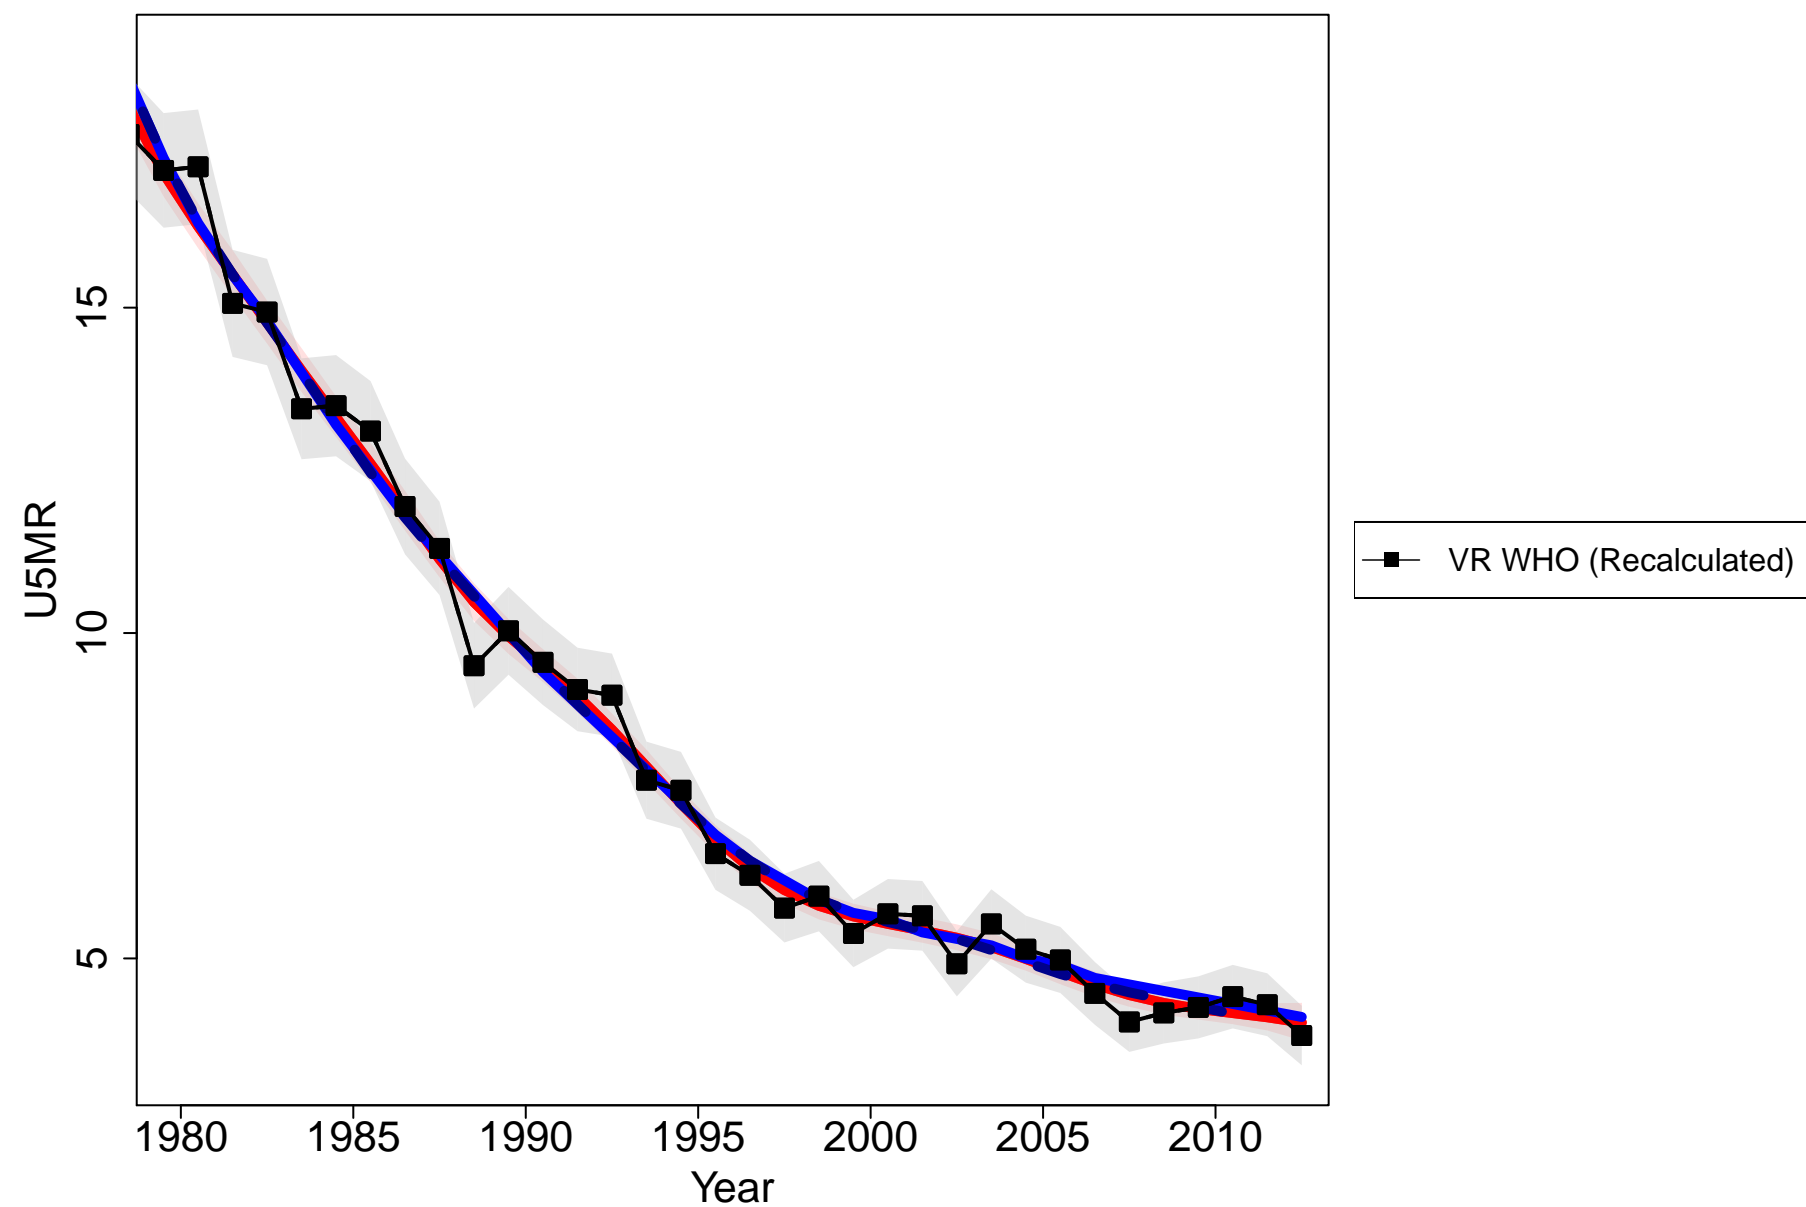

# Belgium

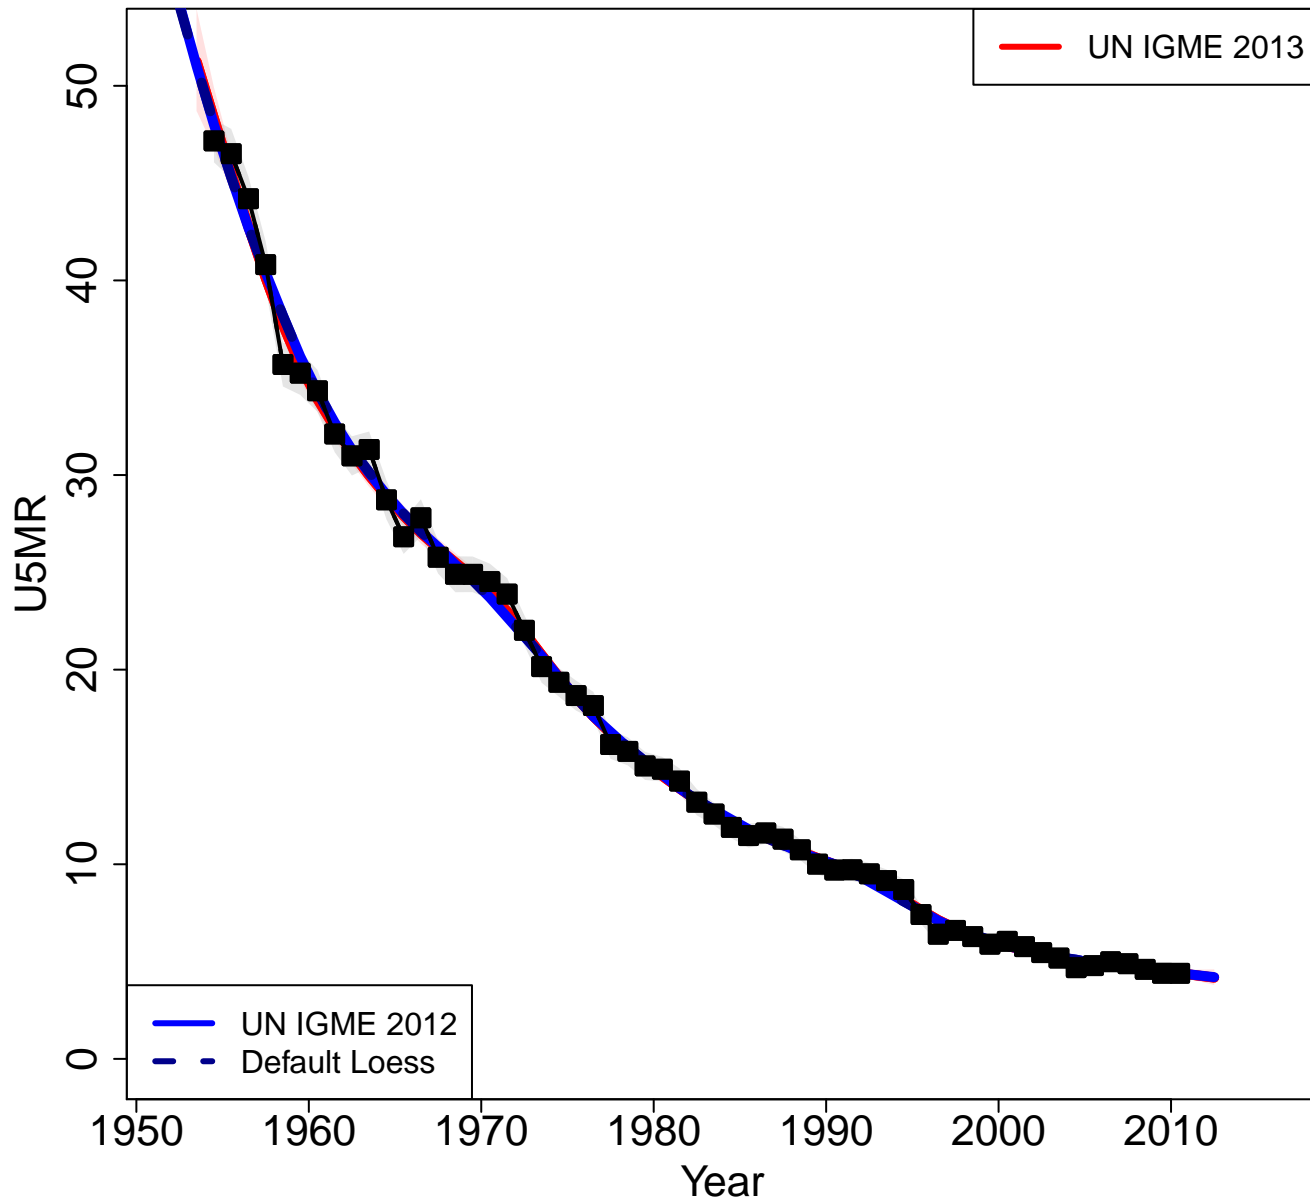

# Zoomed in

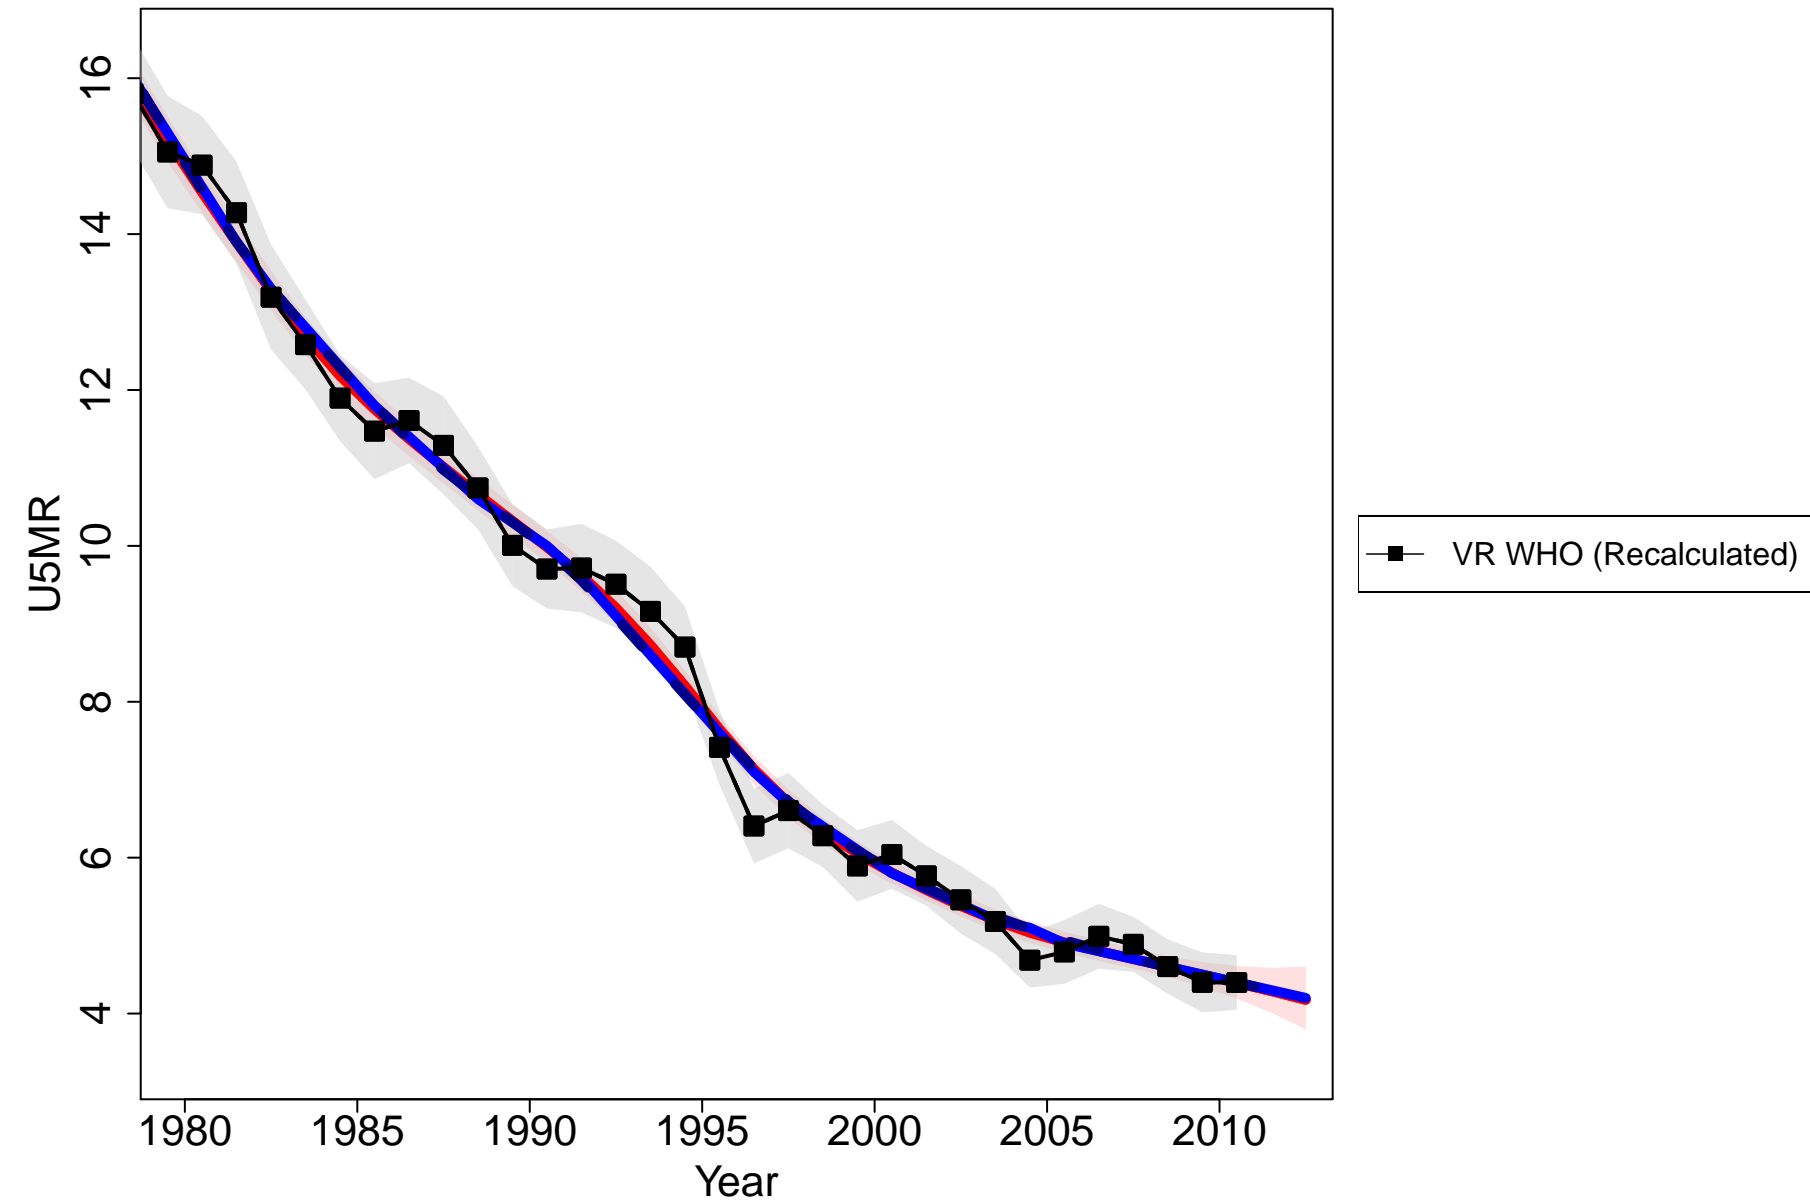



# Bulgaria

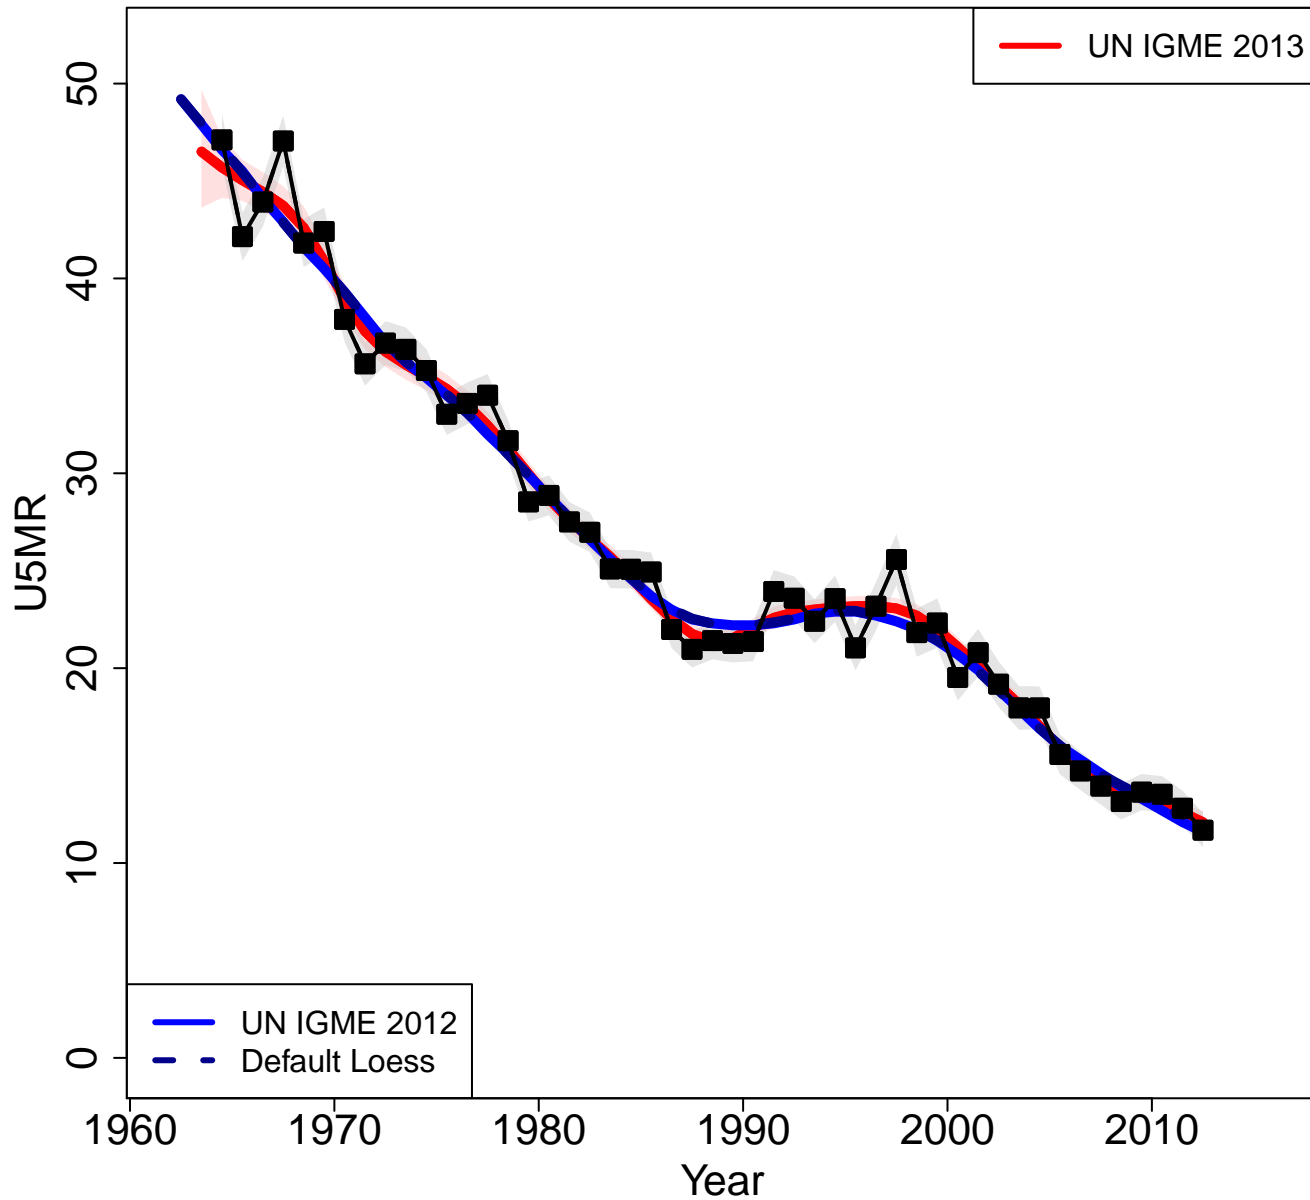

# Zoomed in

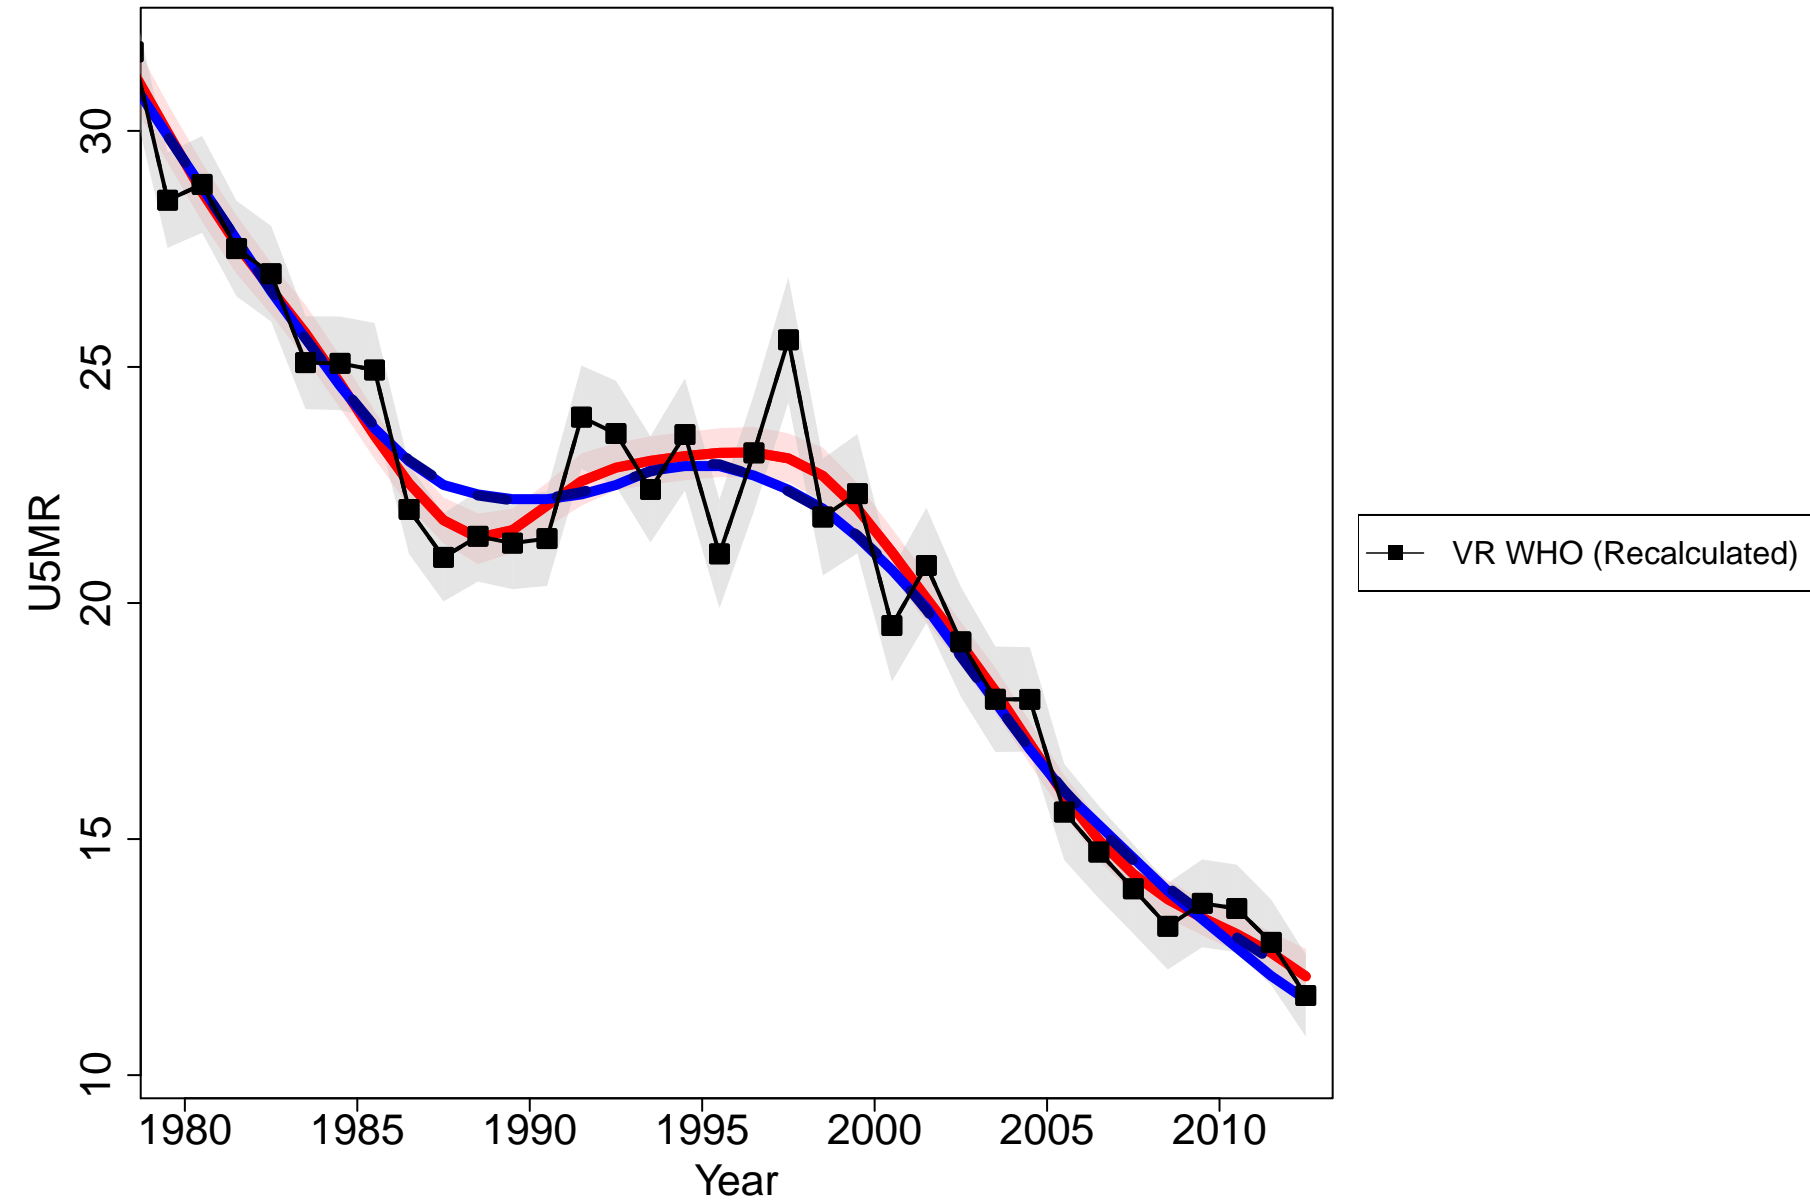

# Canada

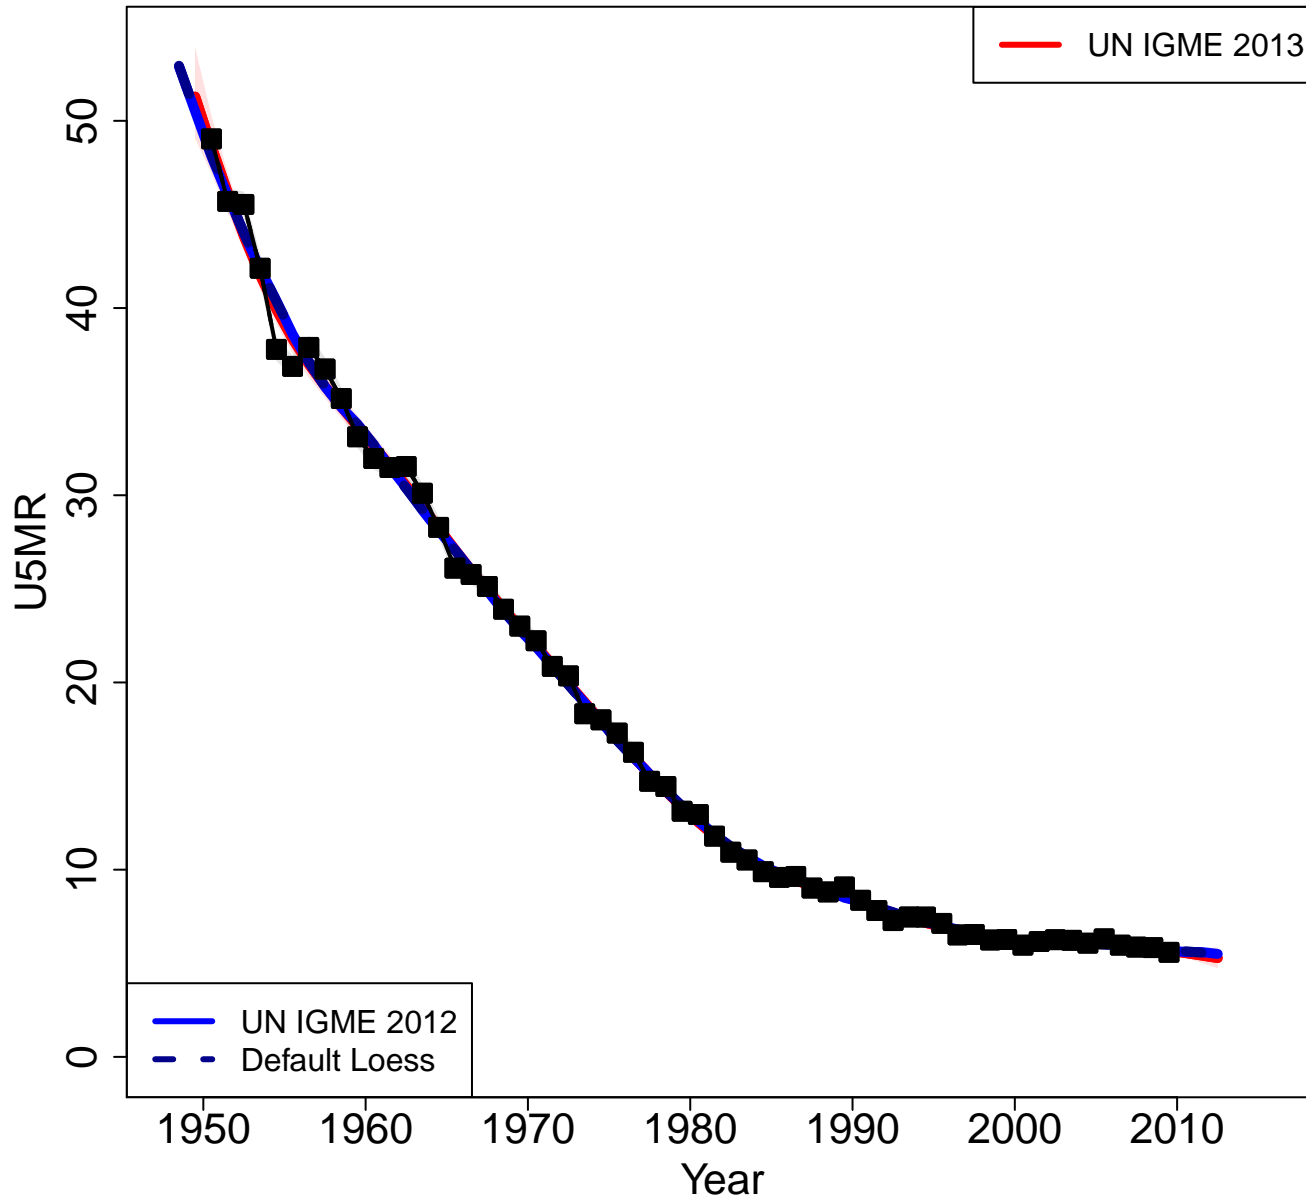

# Zoomed in

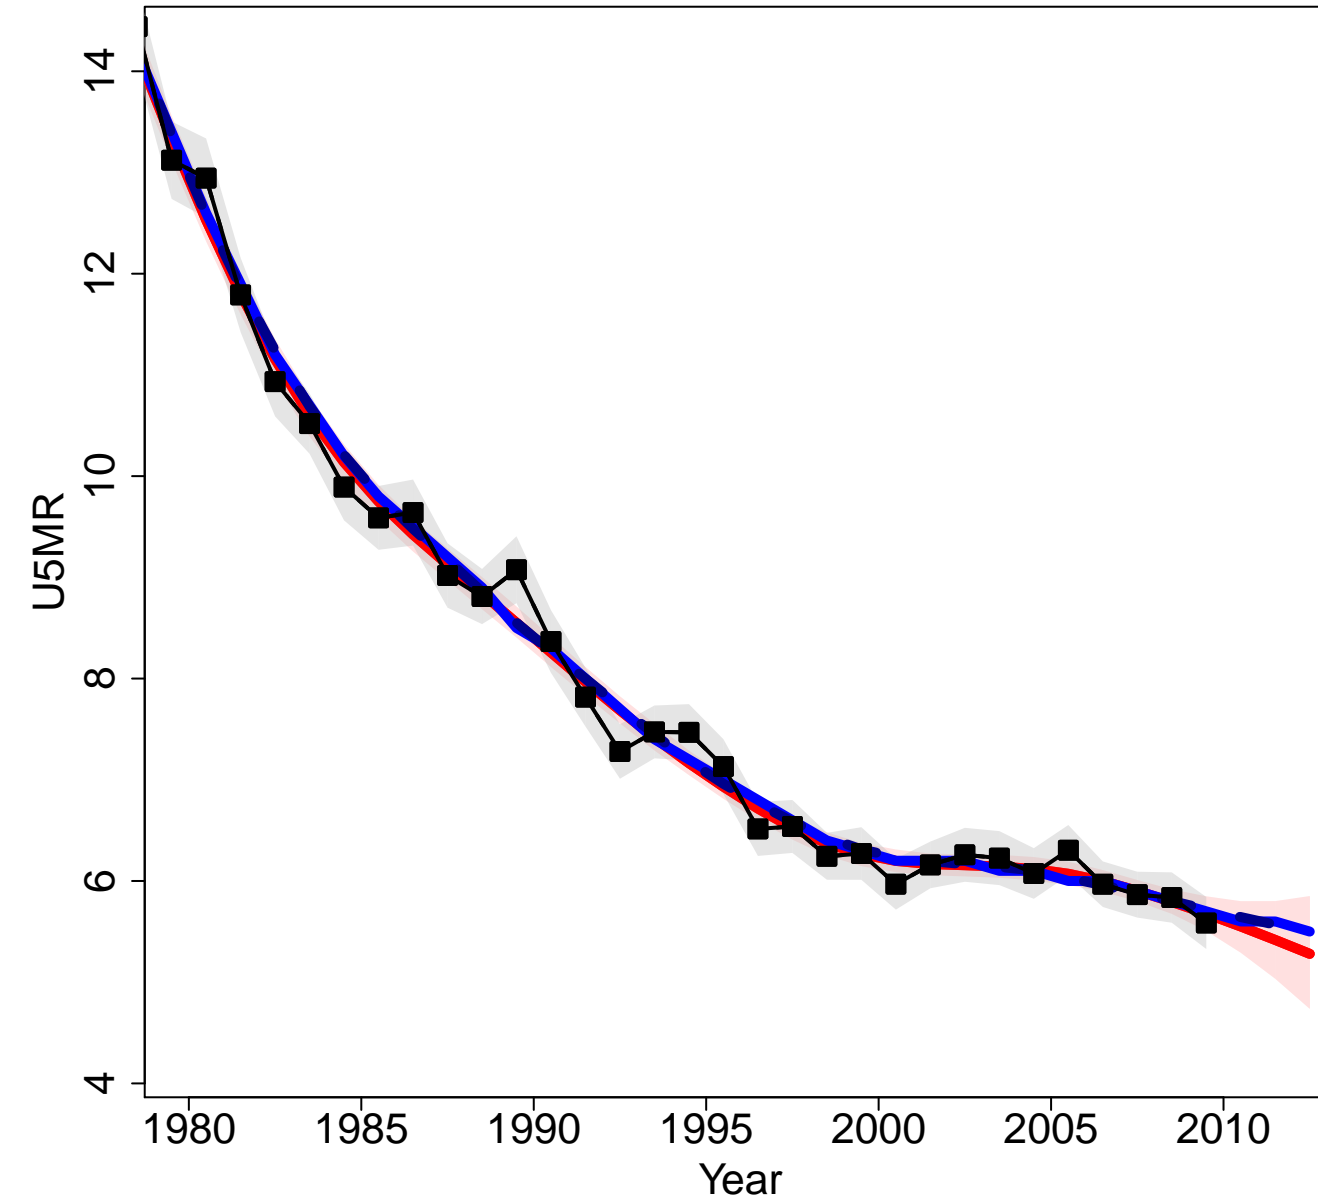

# Croatia

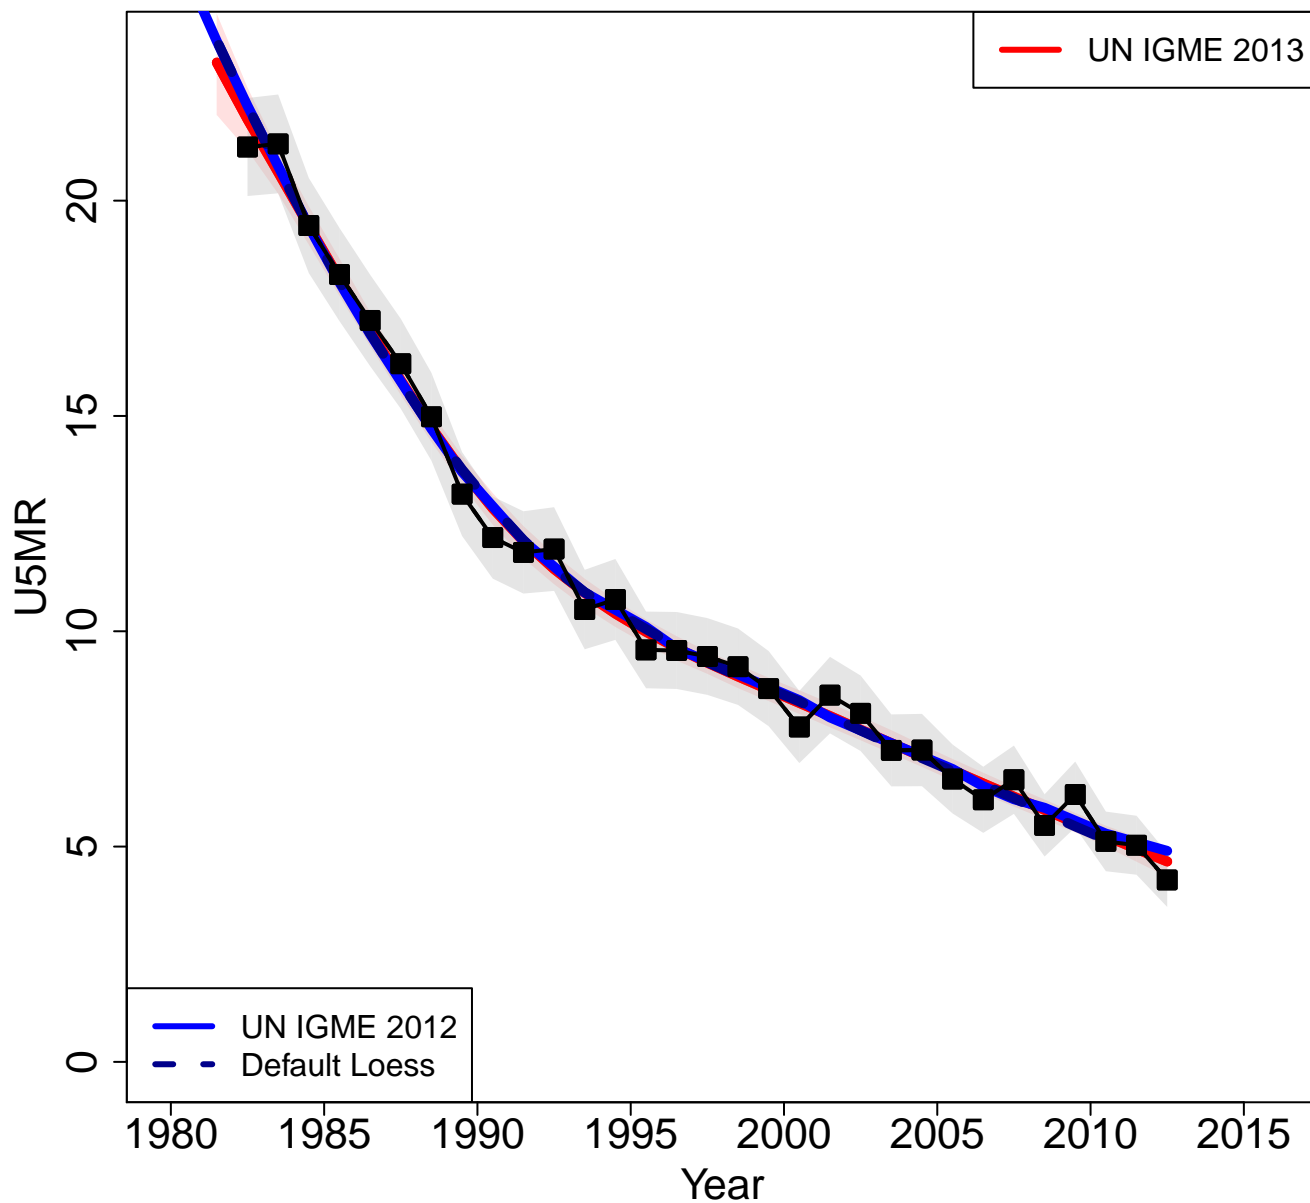

# Zoomed in

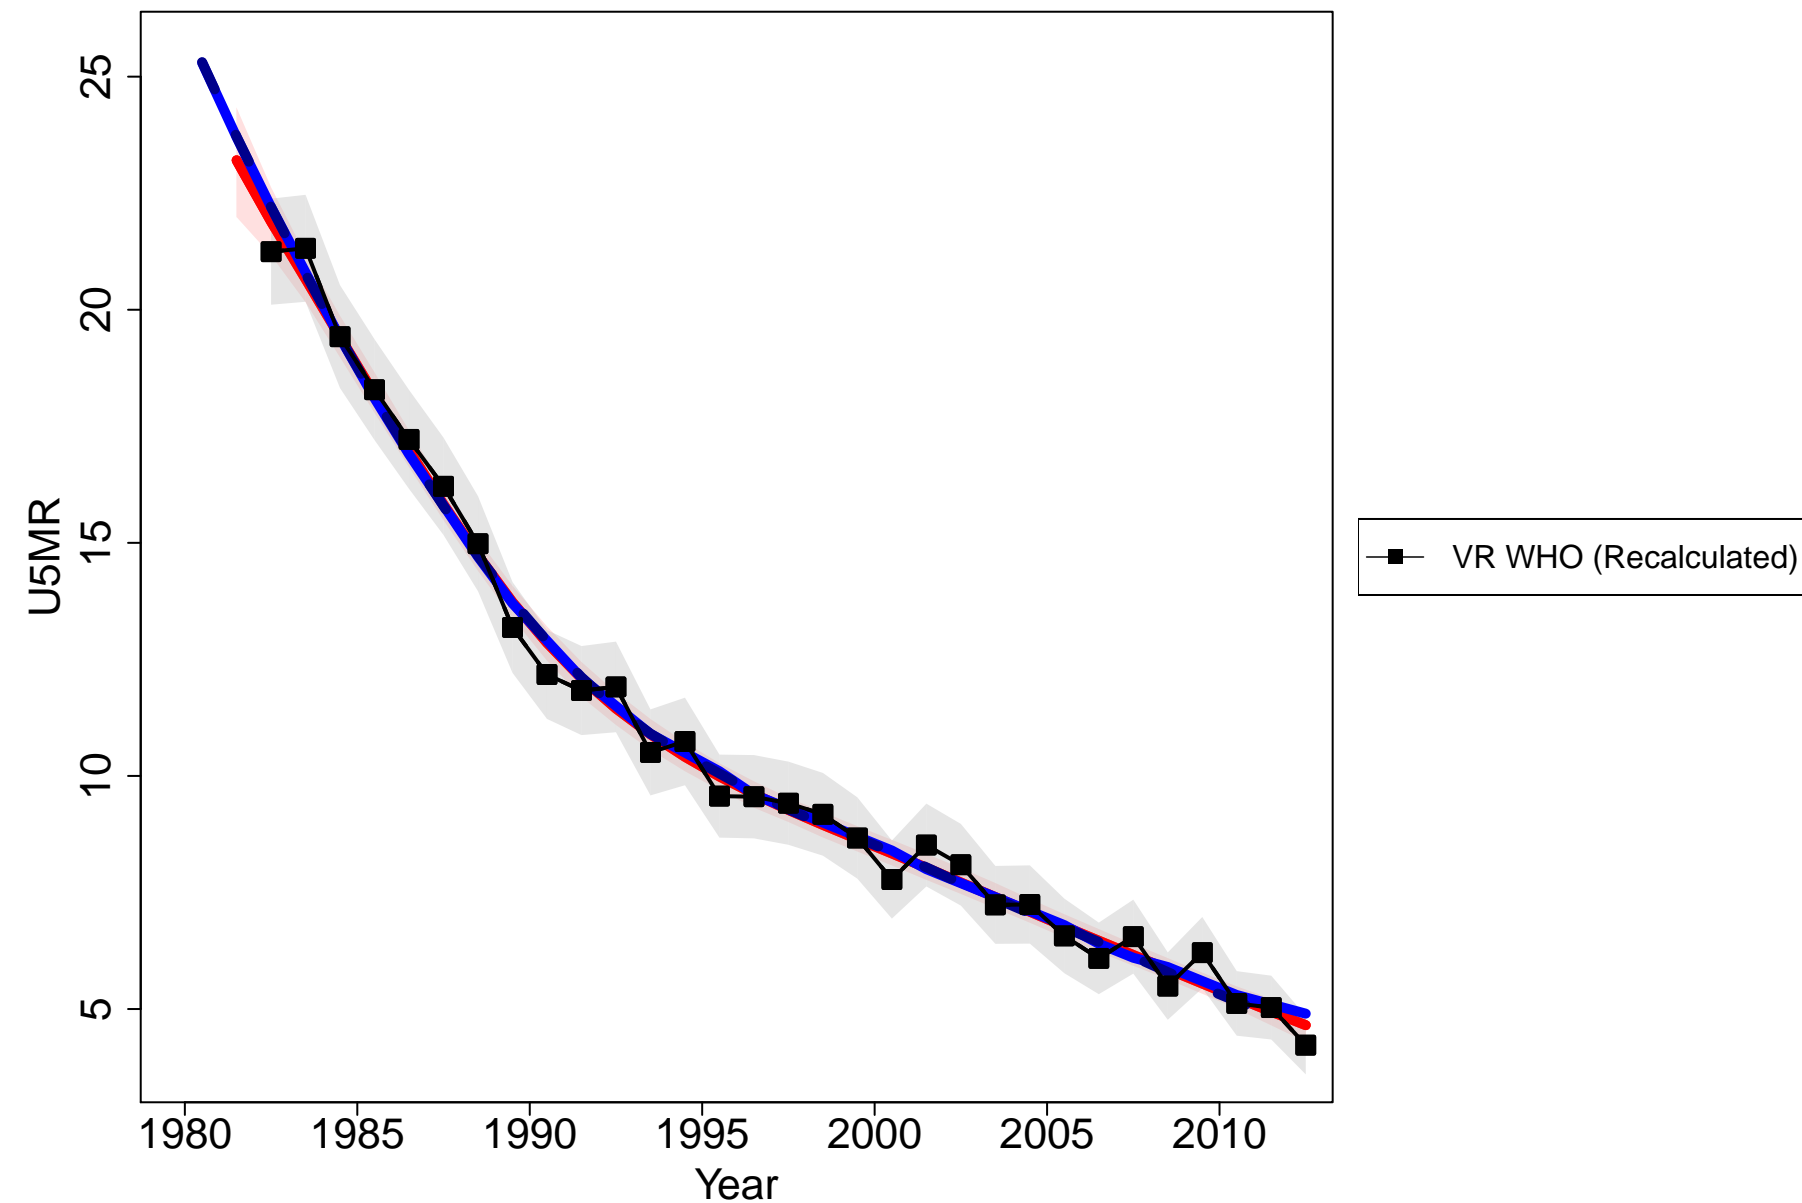

# Cyprus

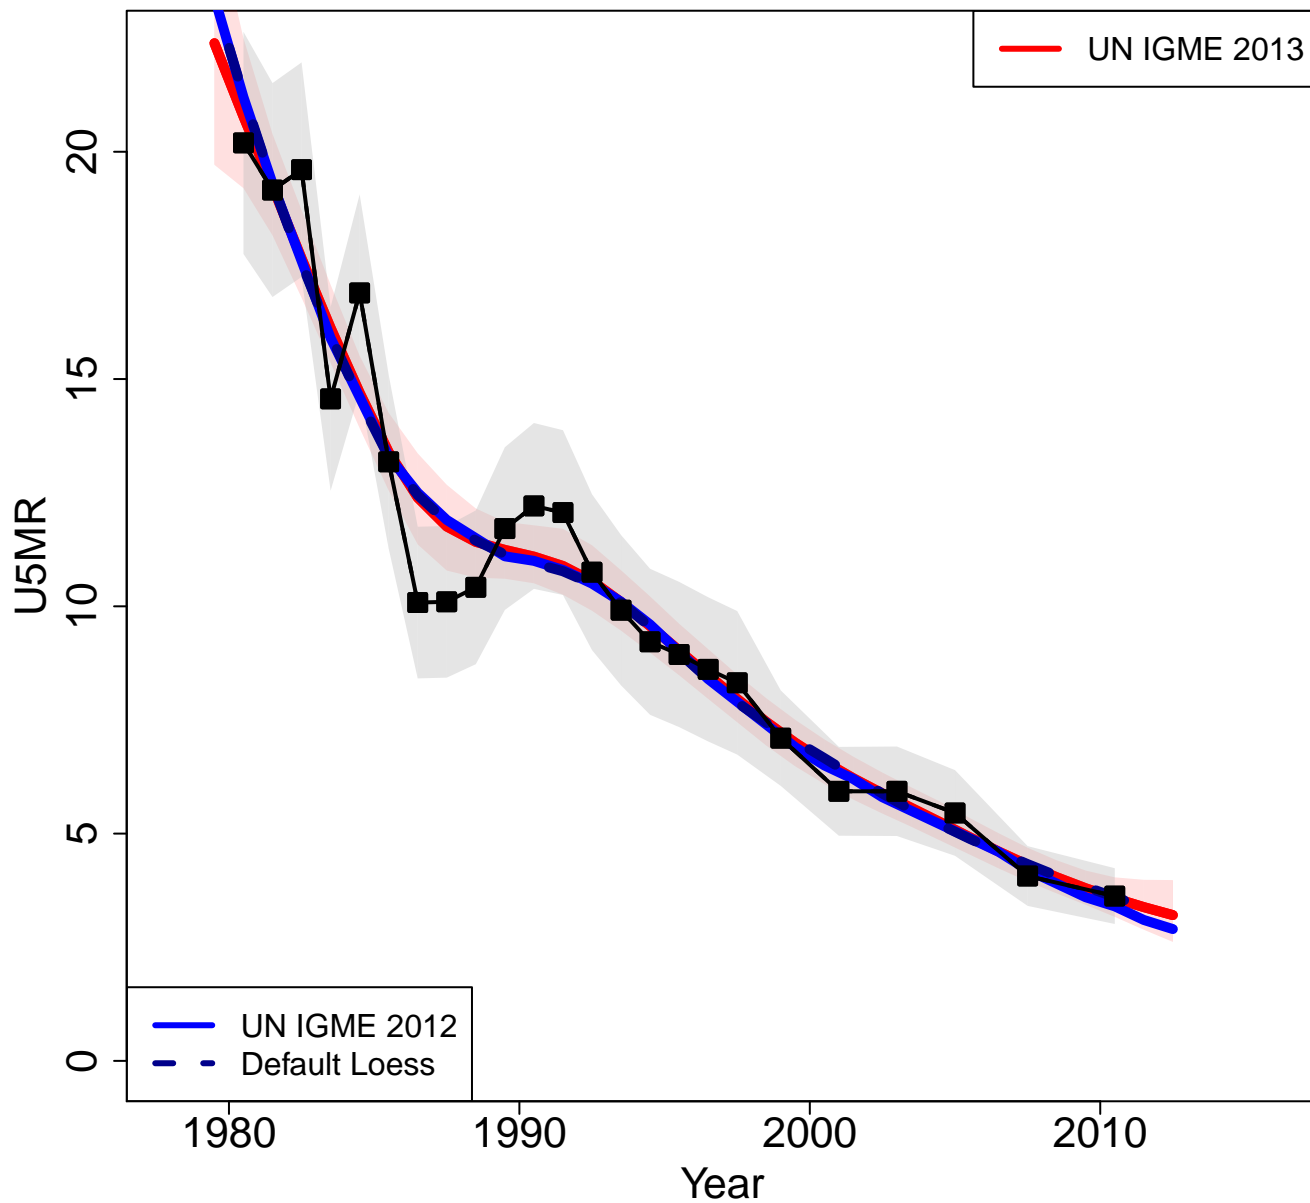

# Zoomed in

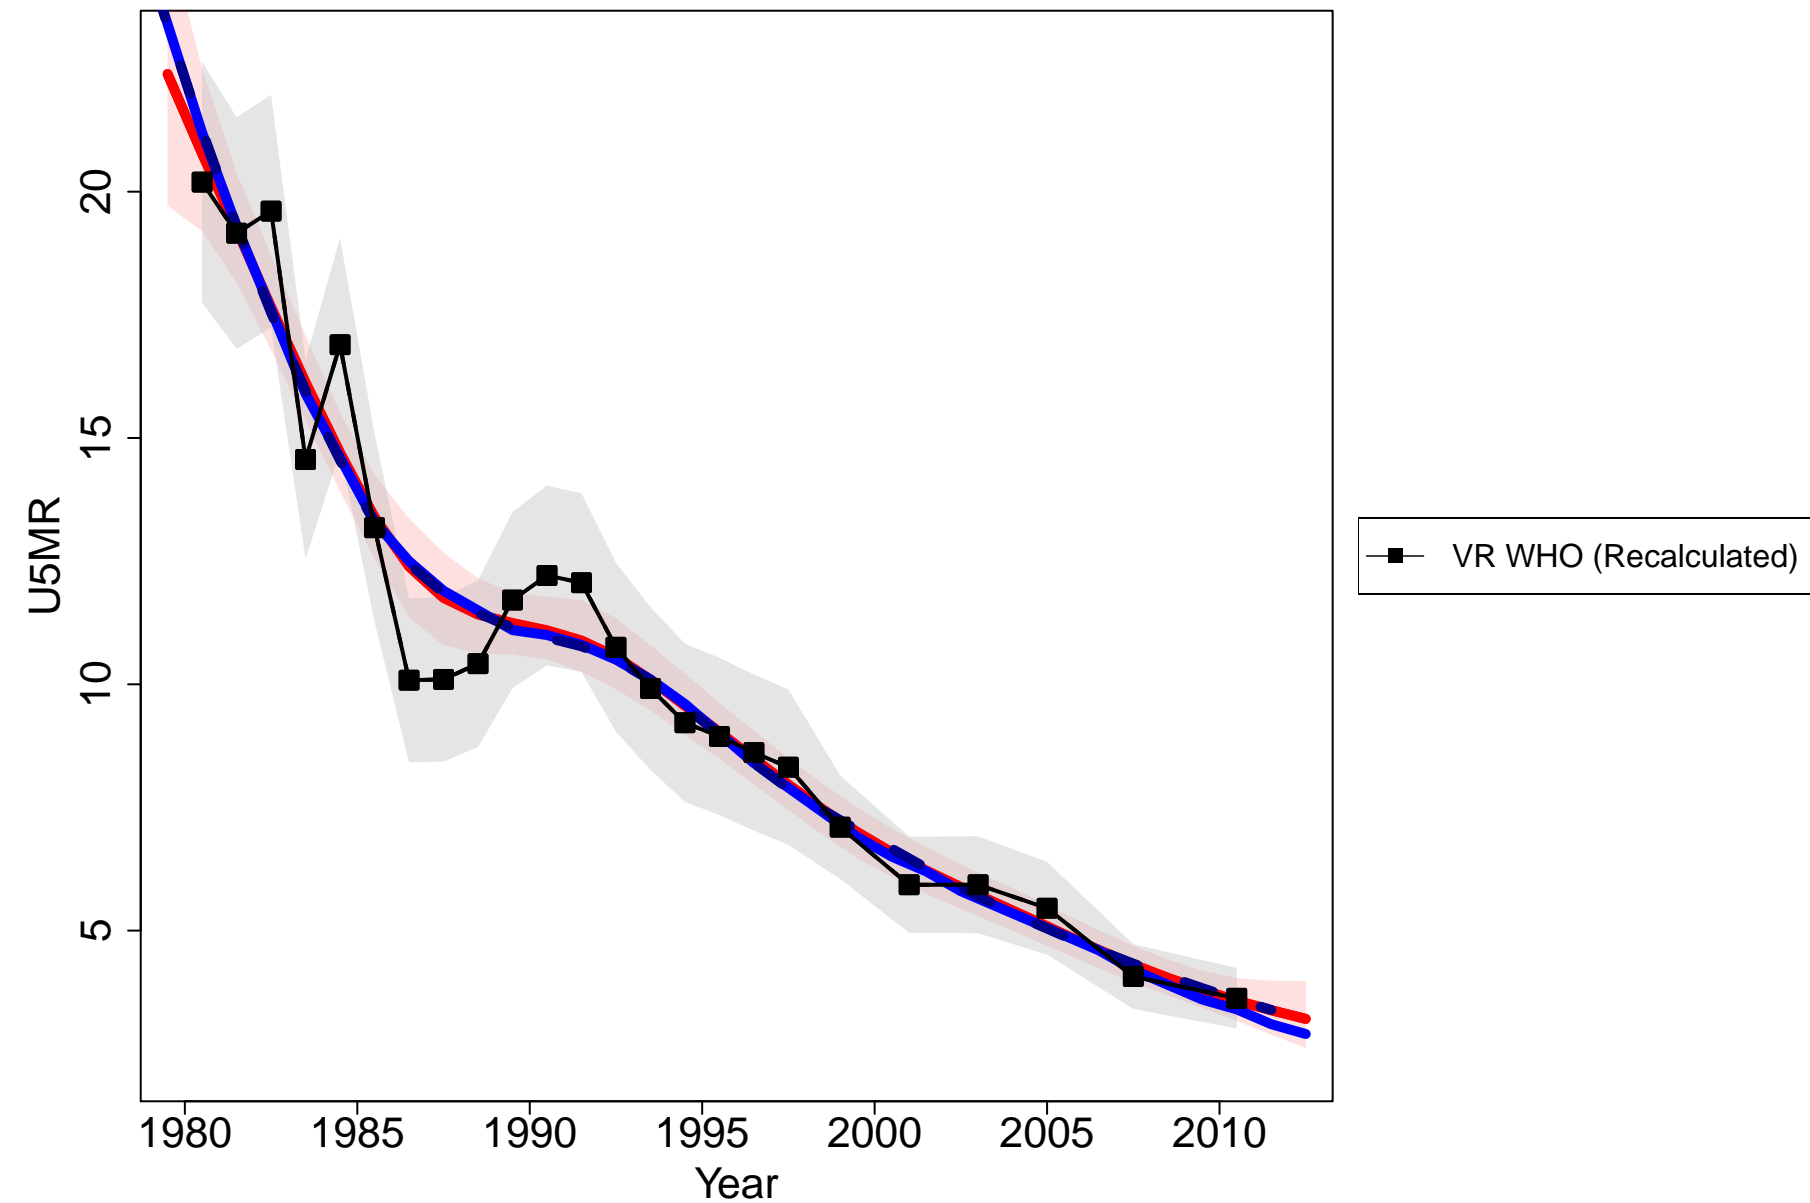

# Czech Republic

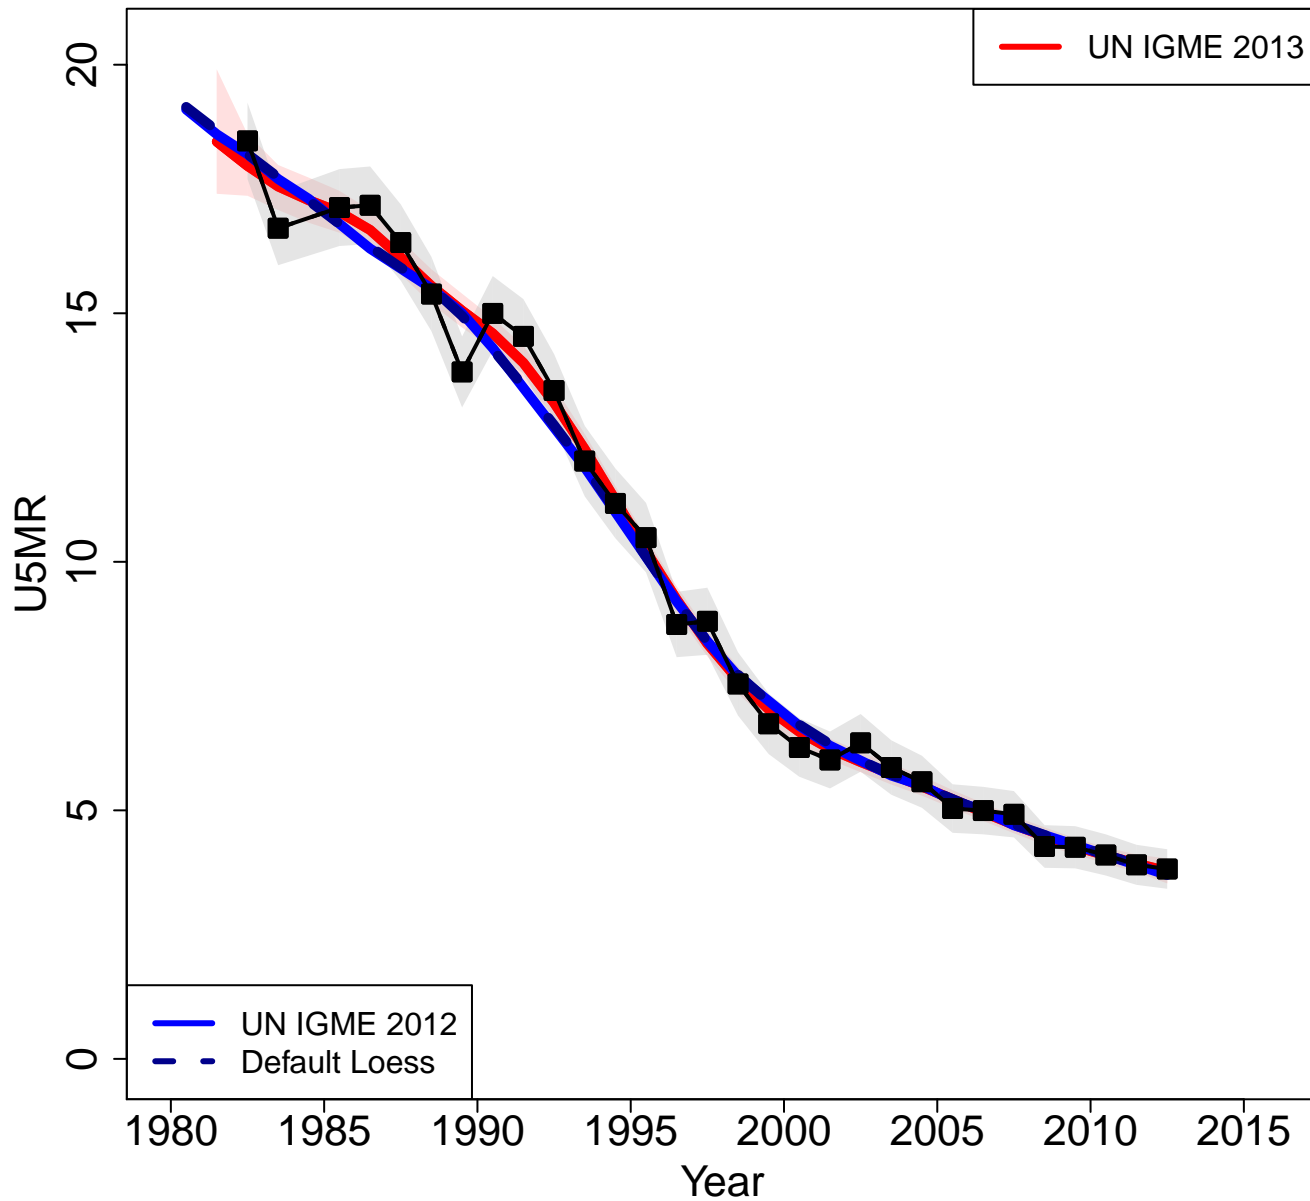

# Zoomed in

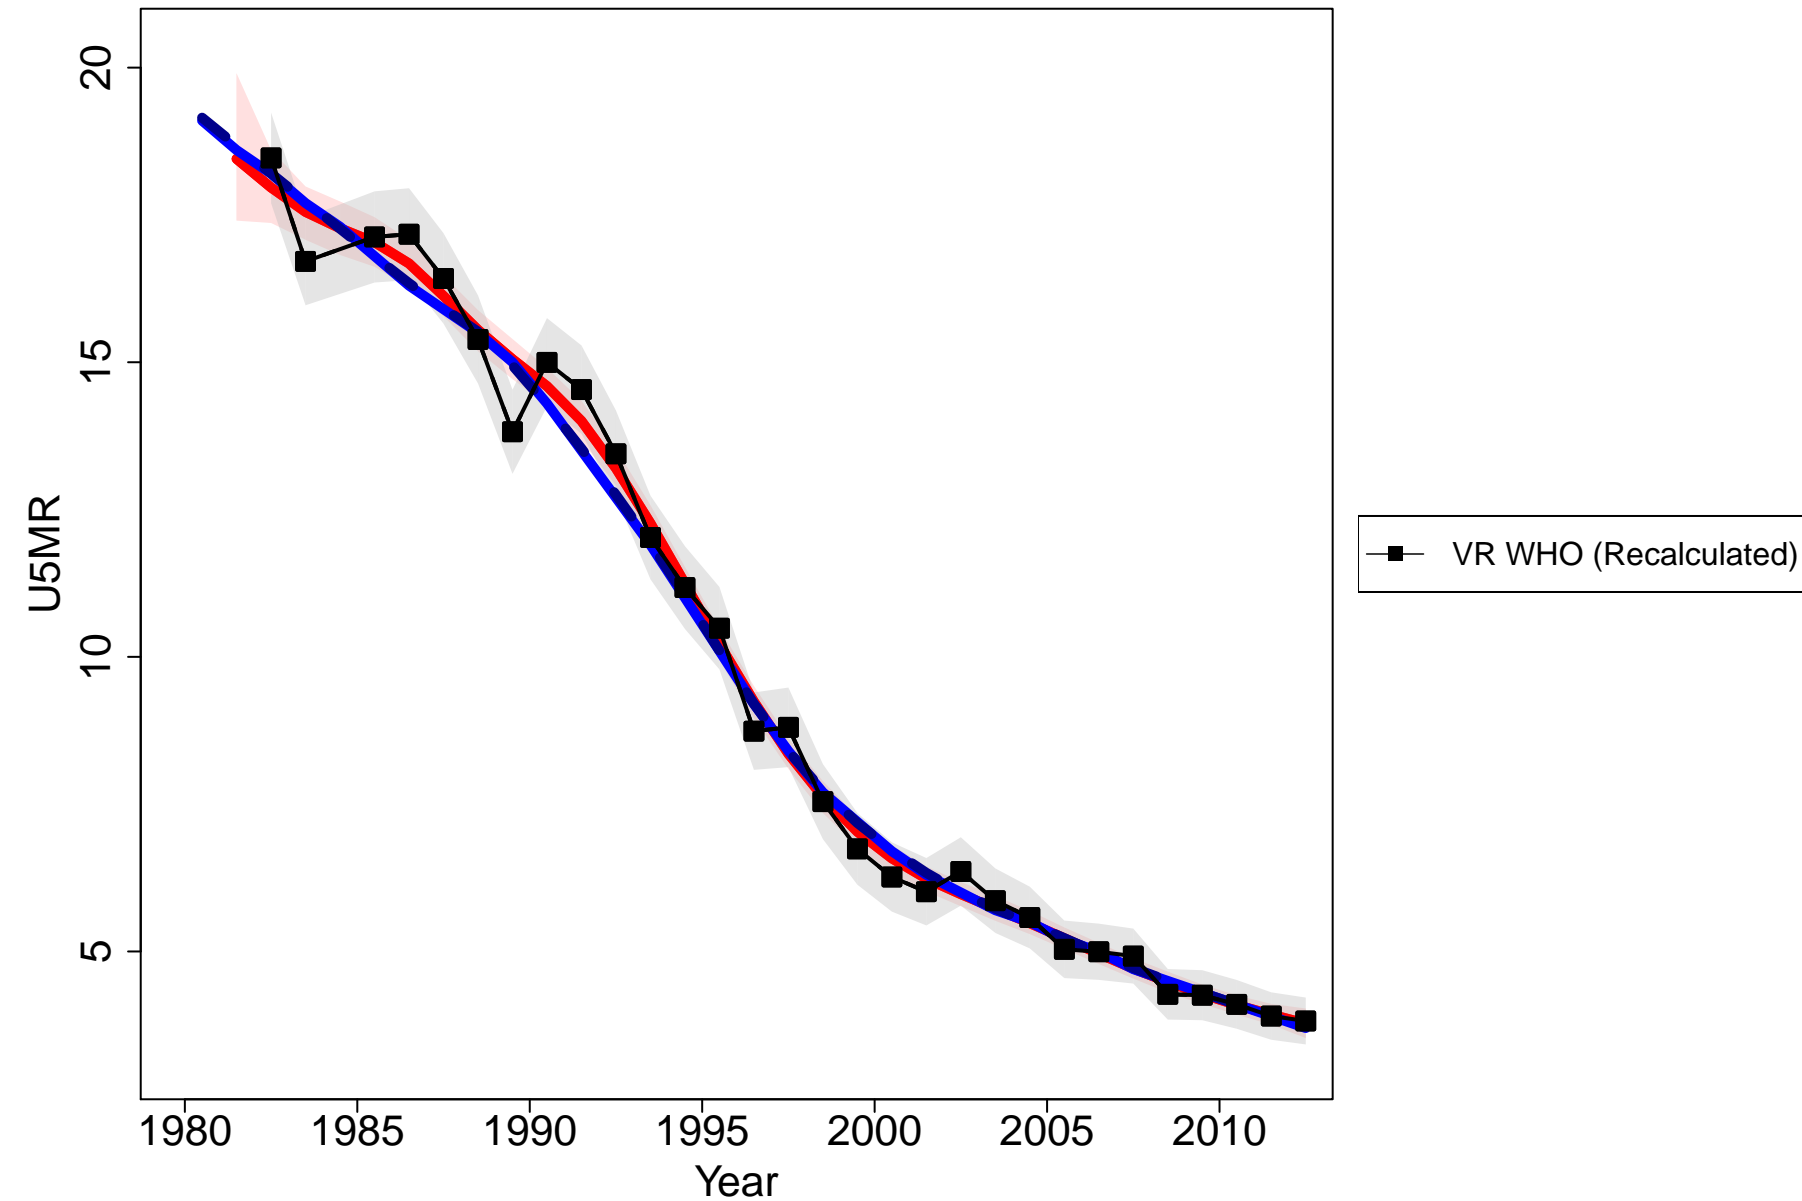

# Denmark

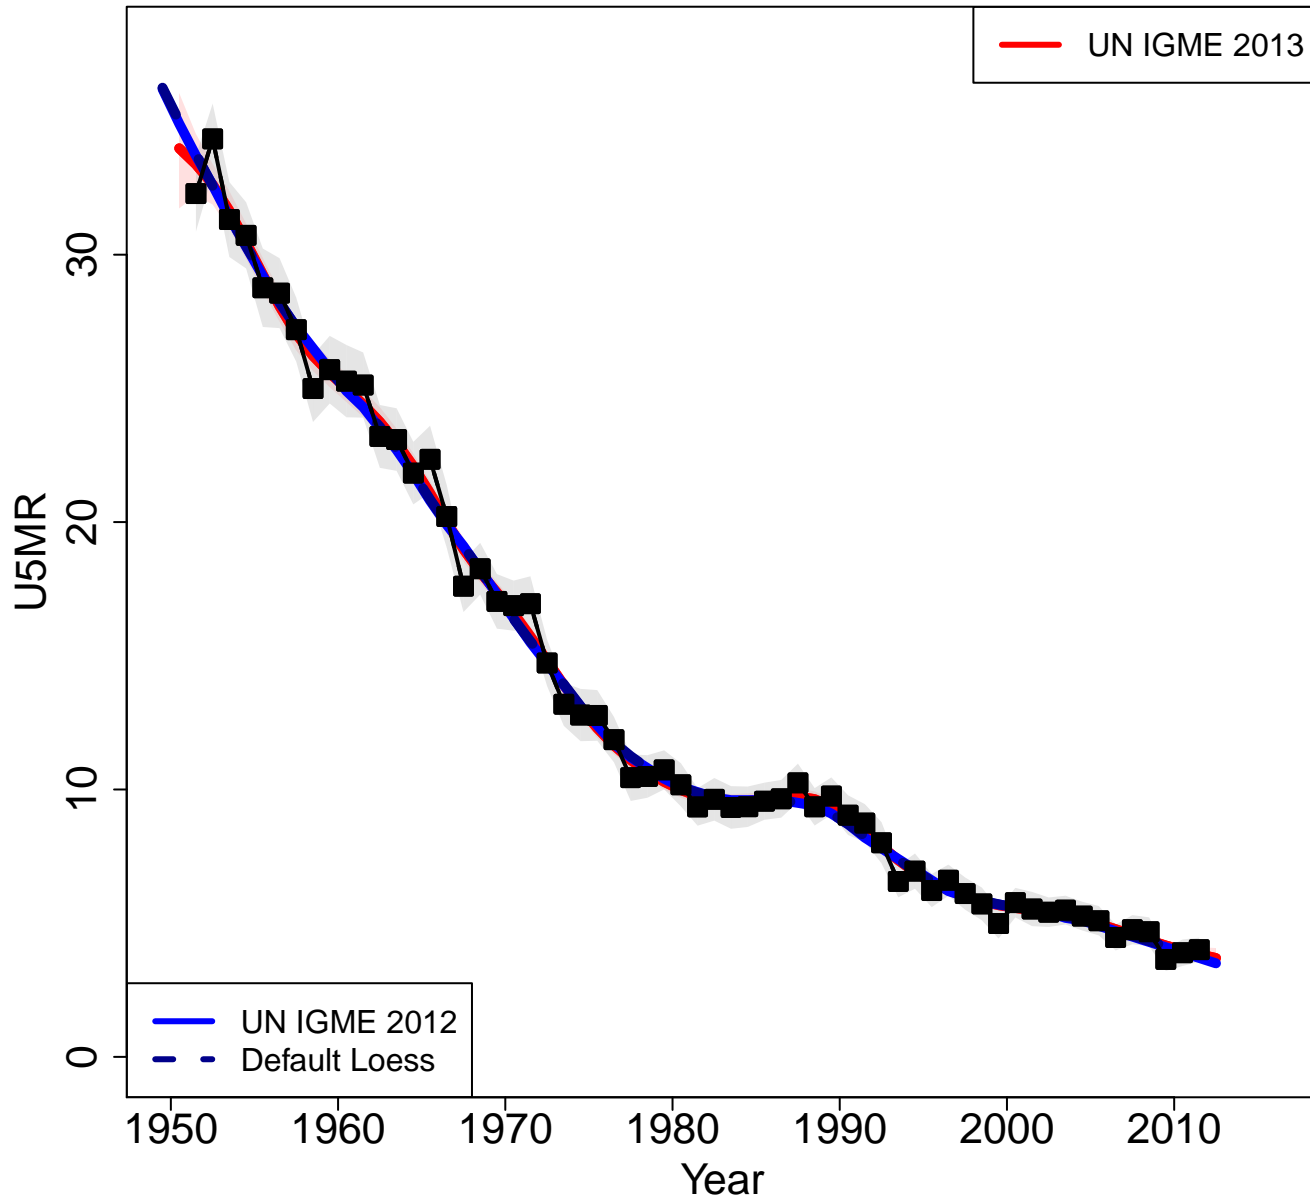

# Zoomed in

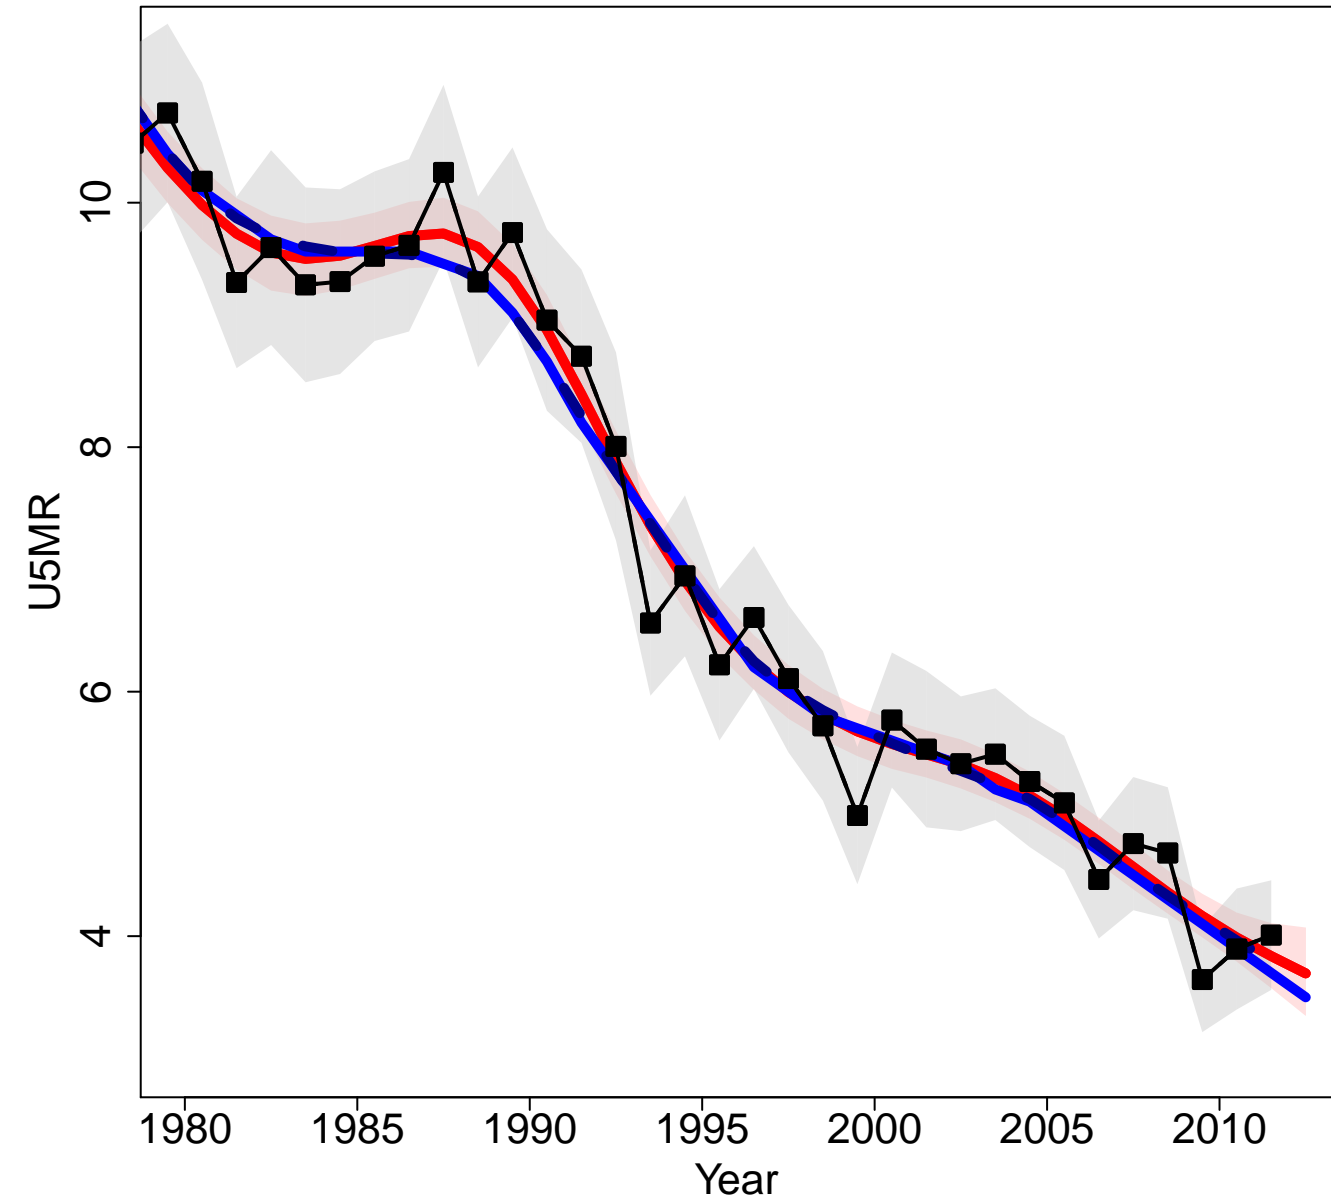

# Dominica

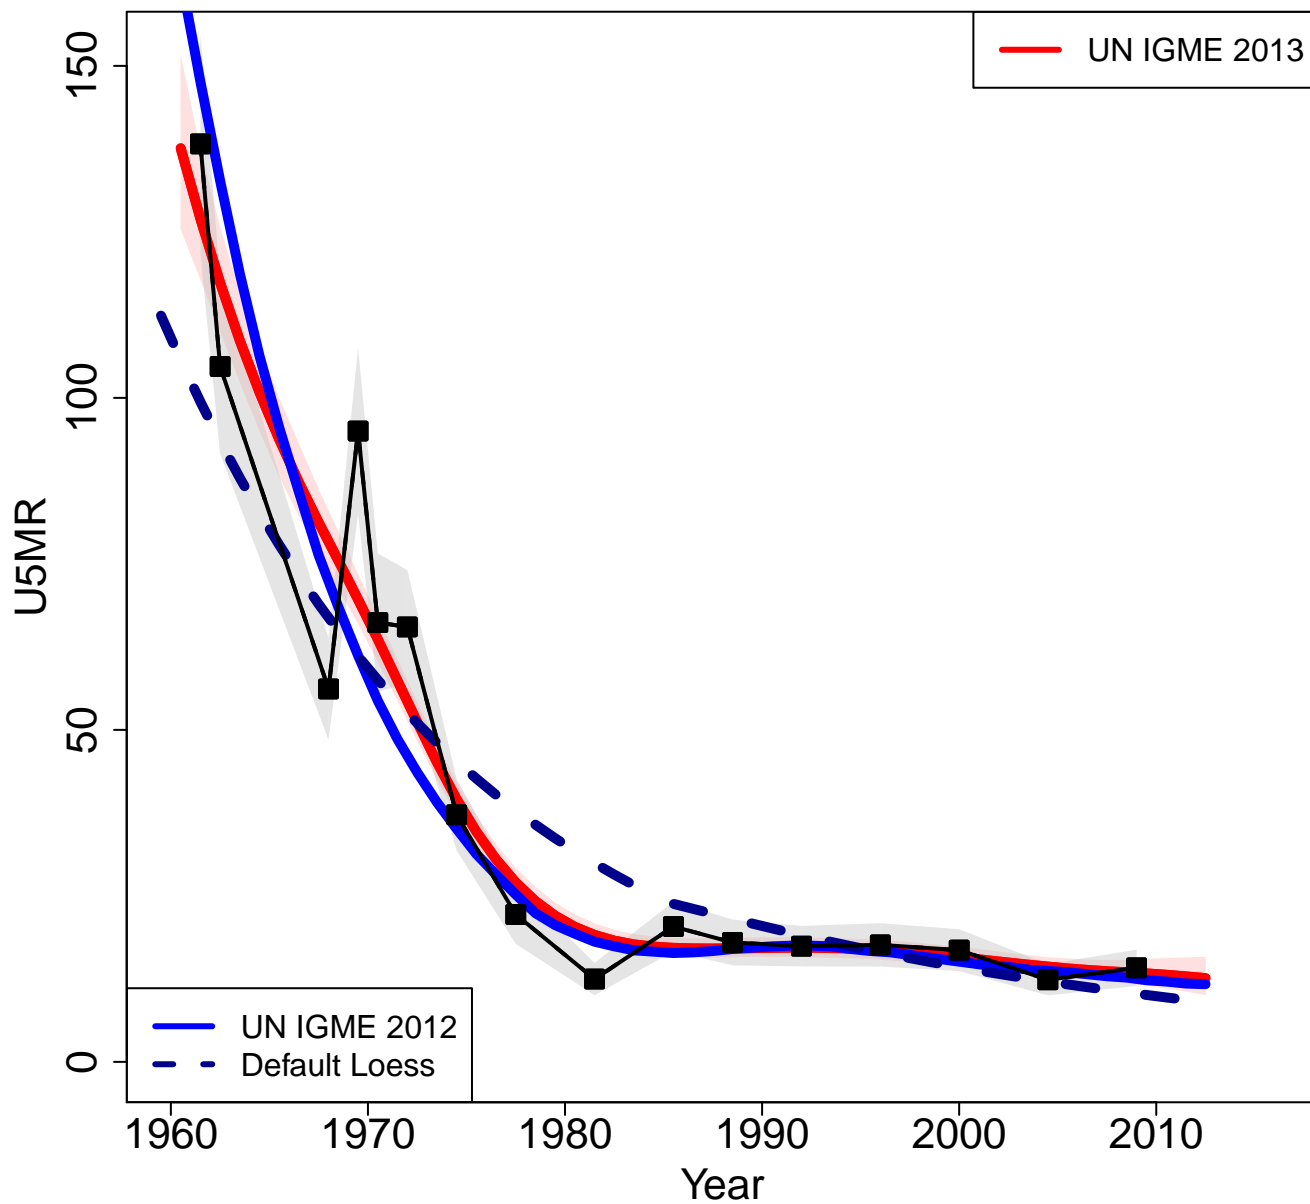

# Zoomed in

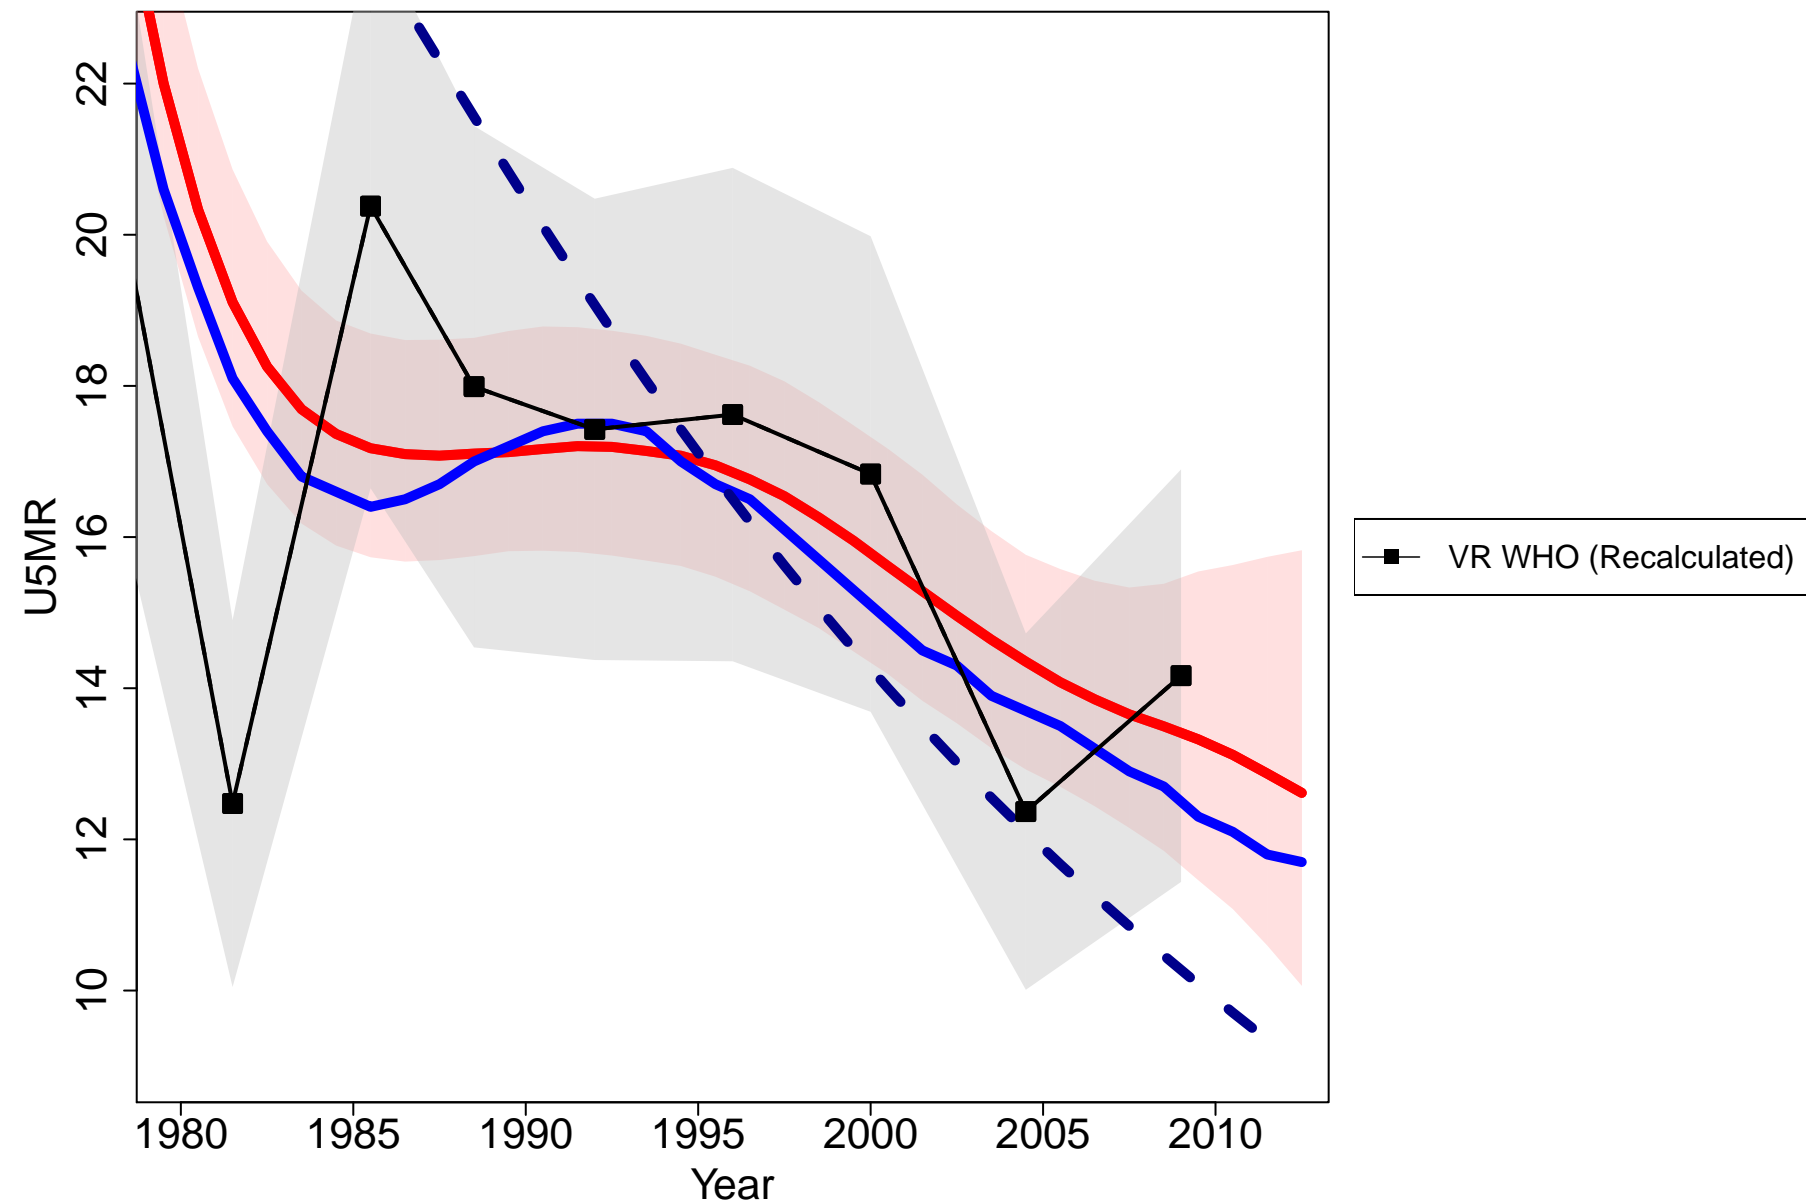



# Estonia

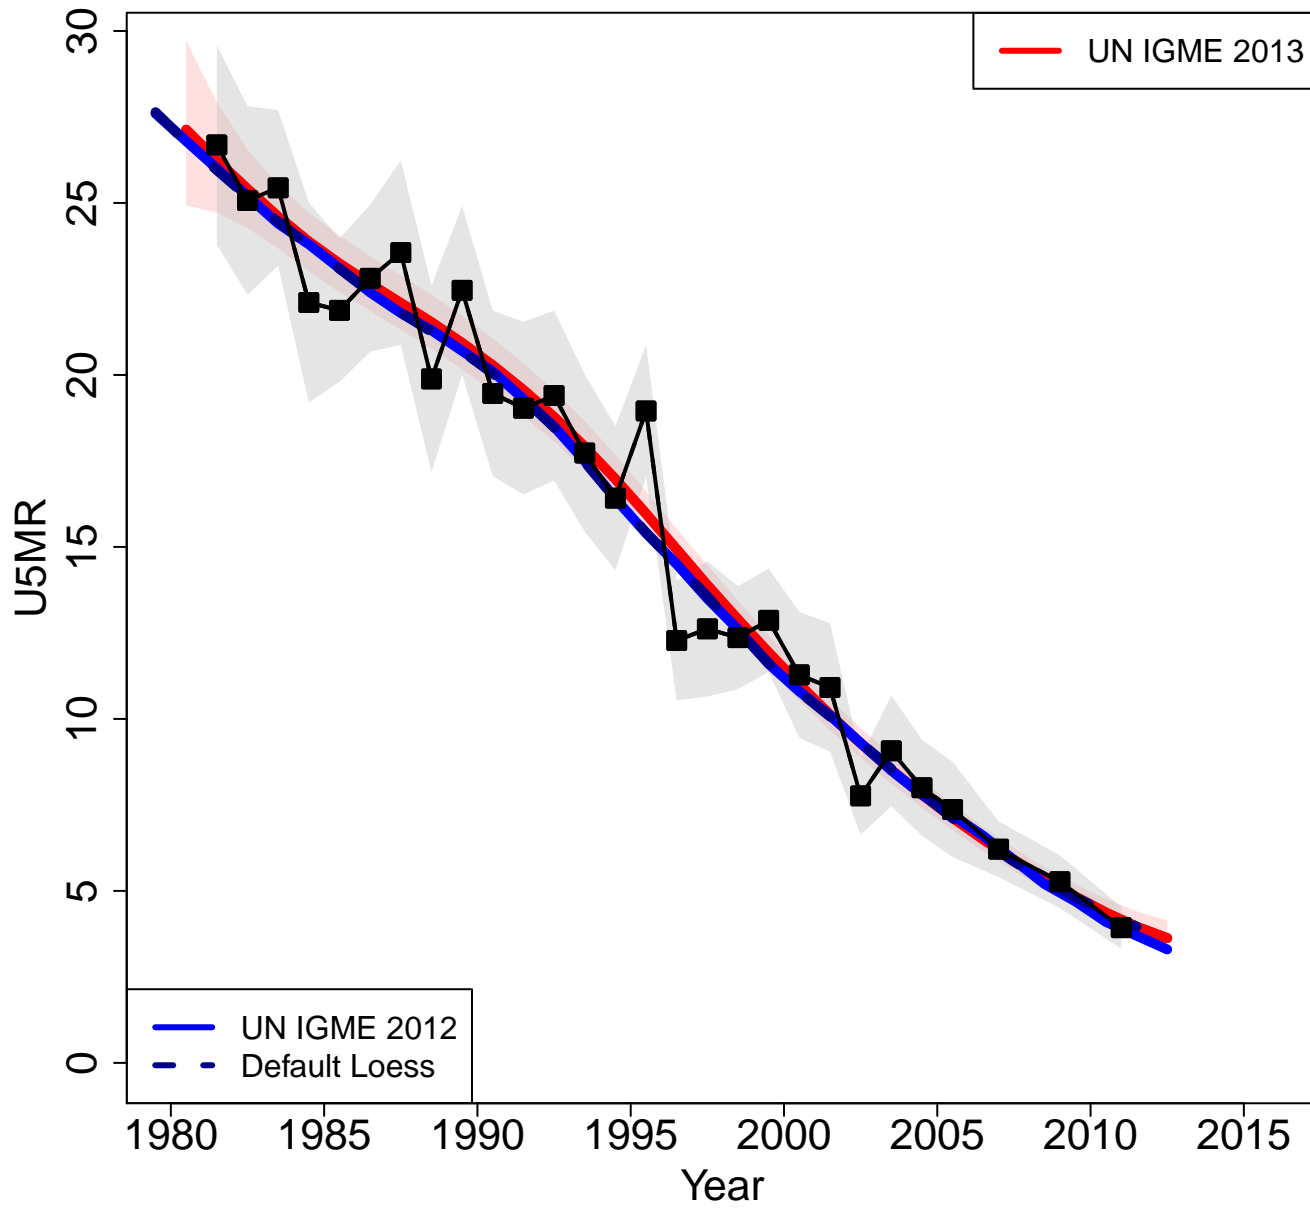

# Zoomed in

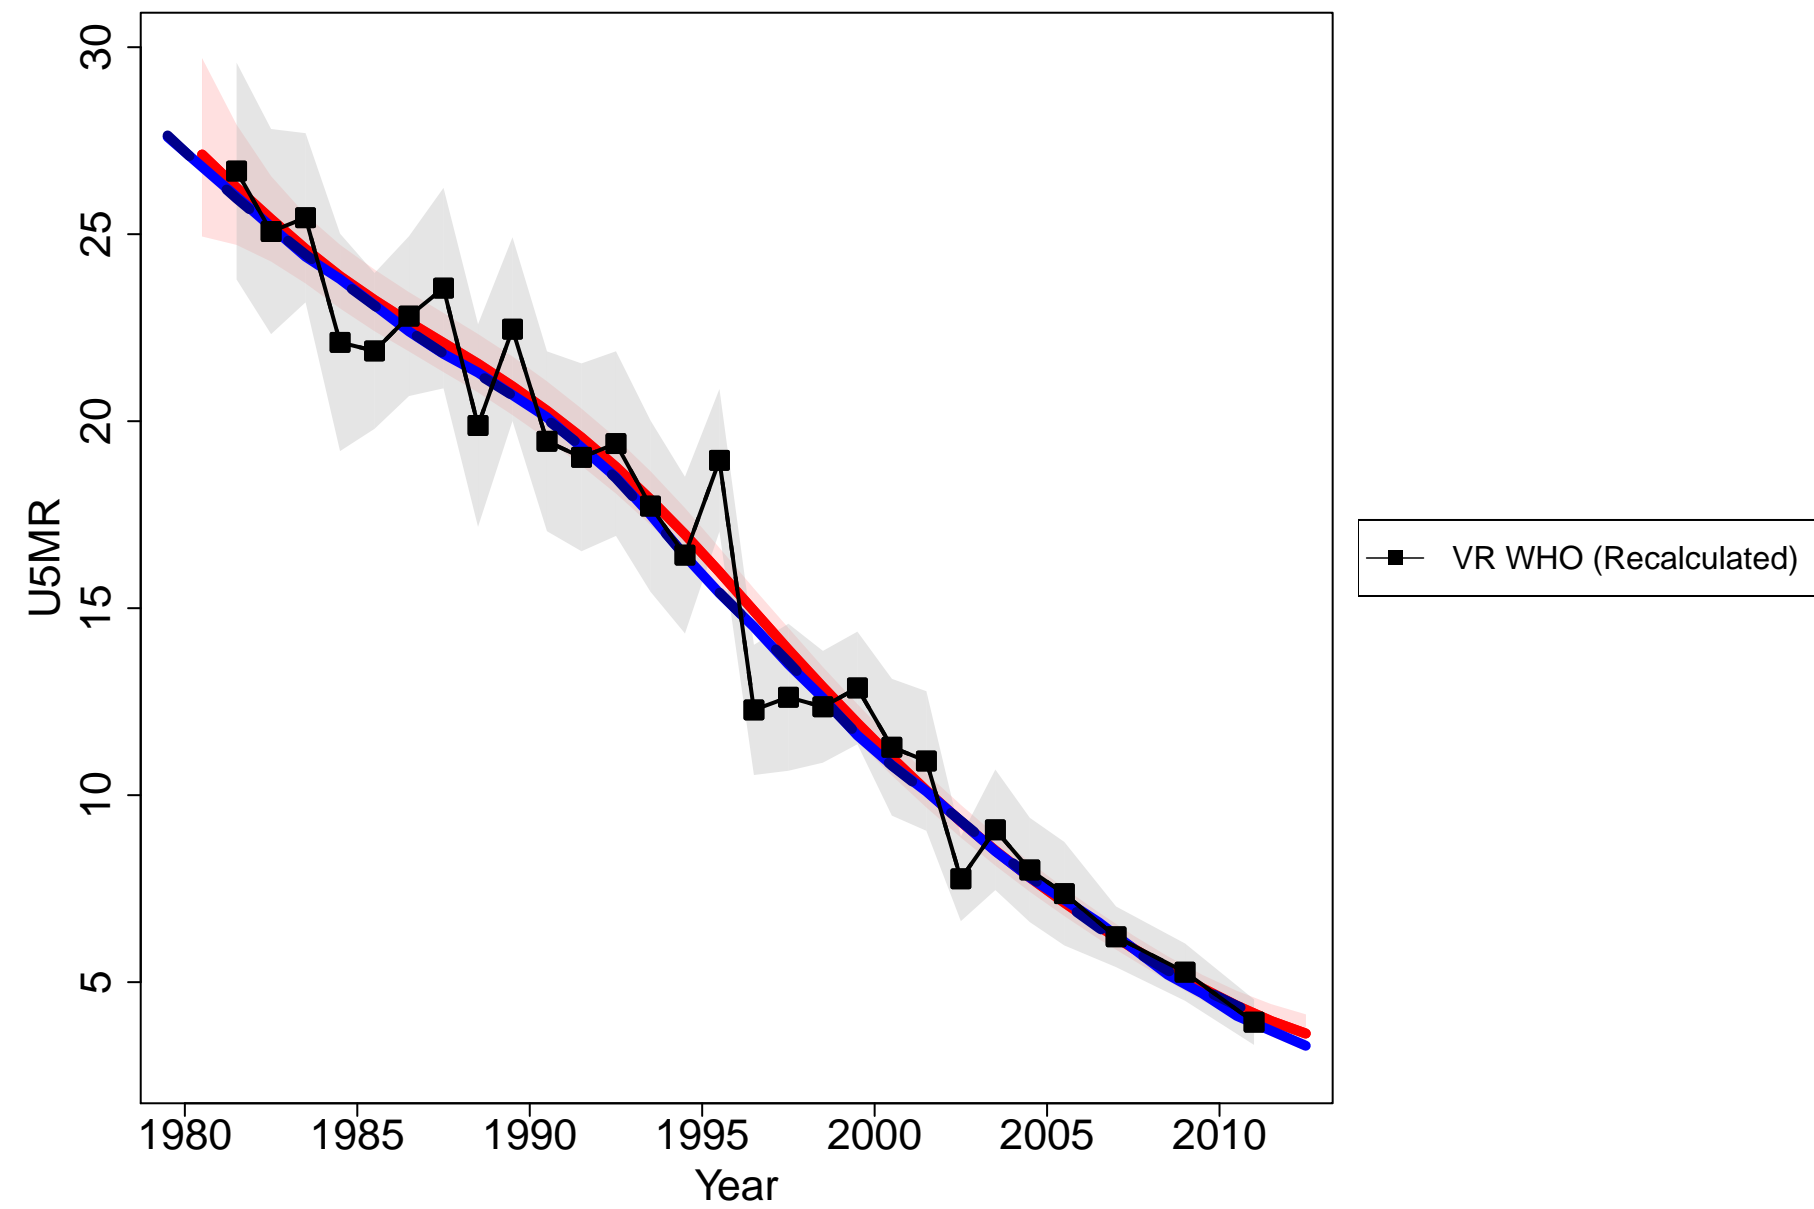

# Finland

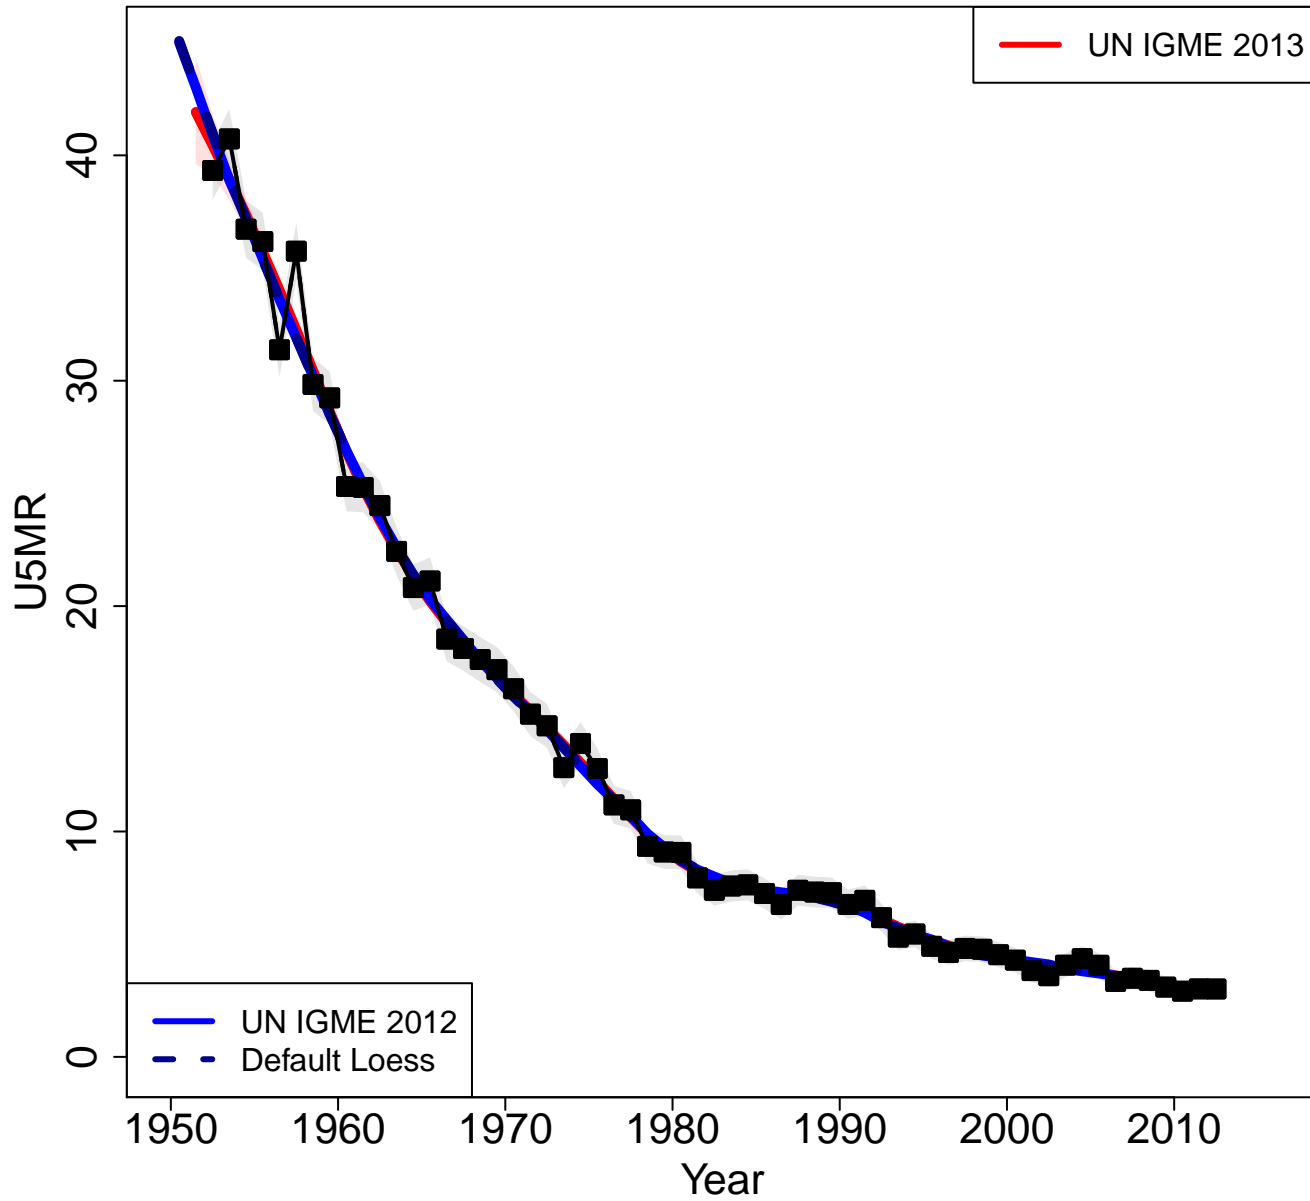

# Zoomed in

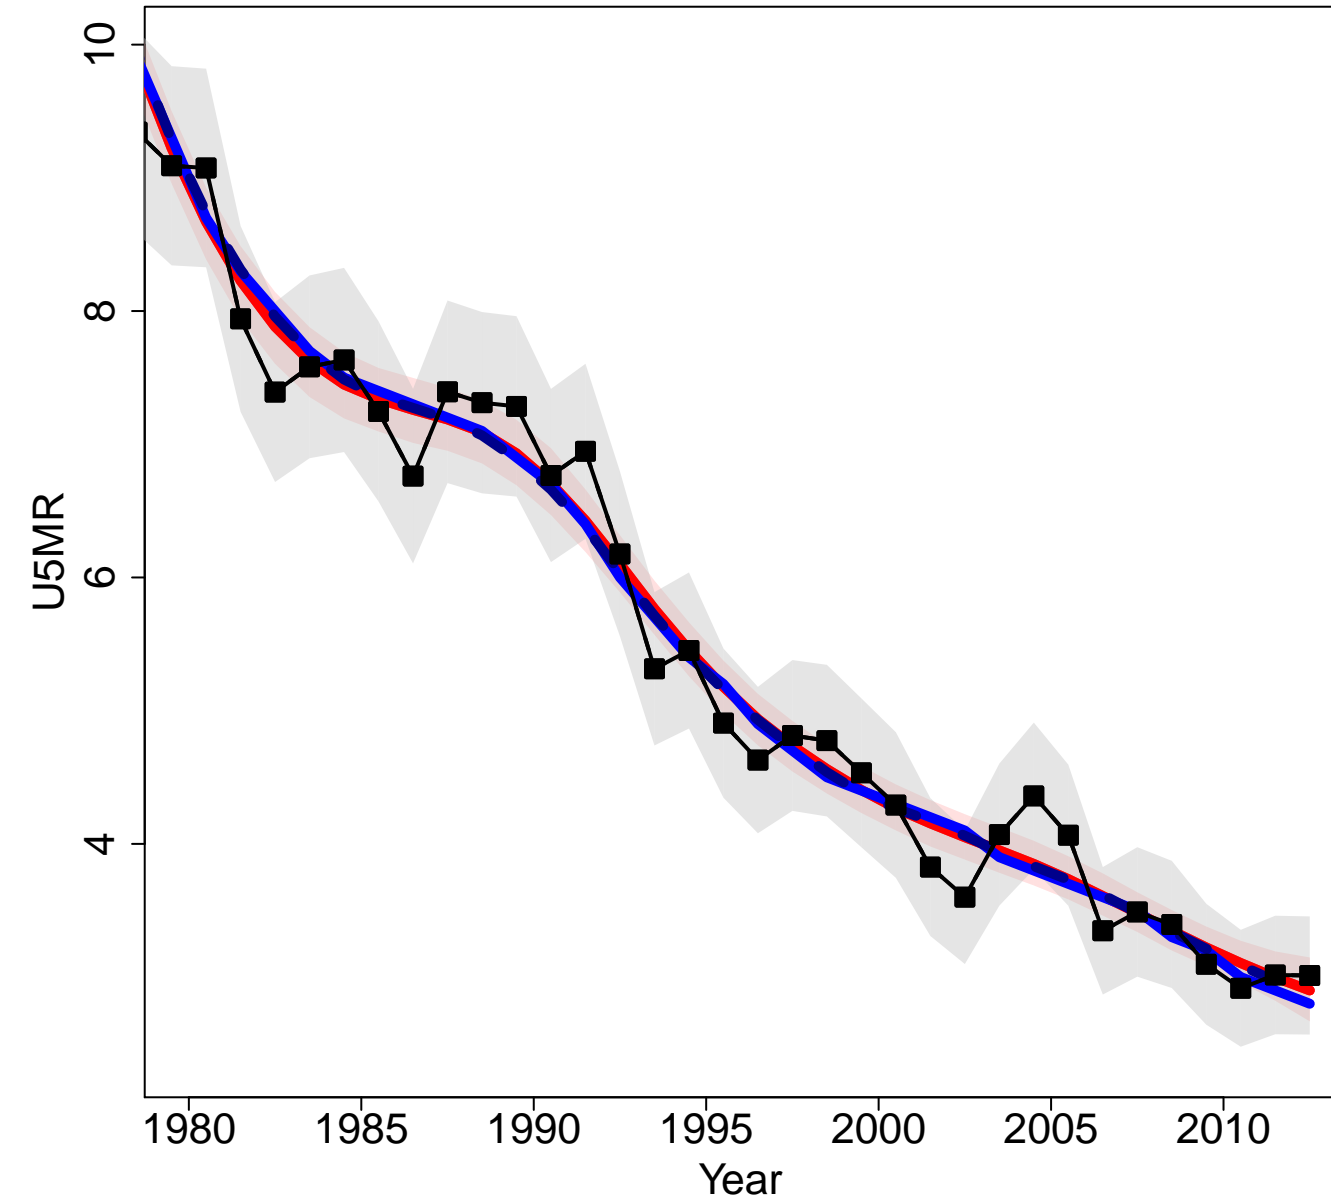

# France

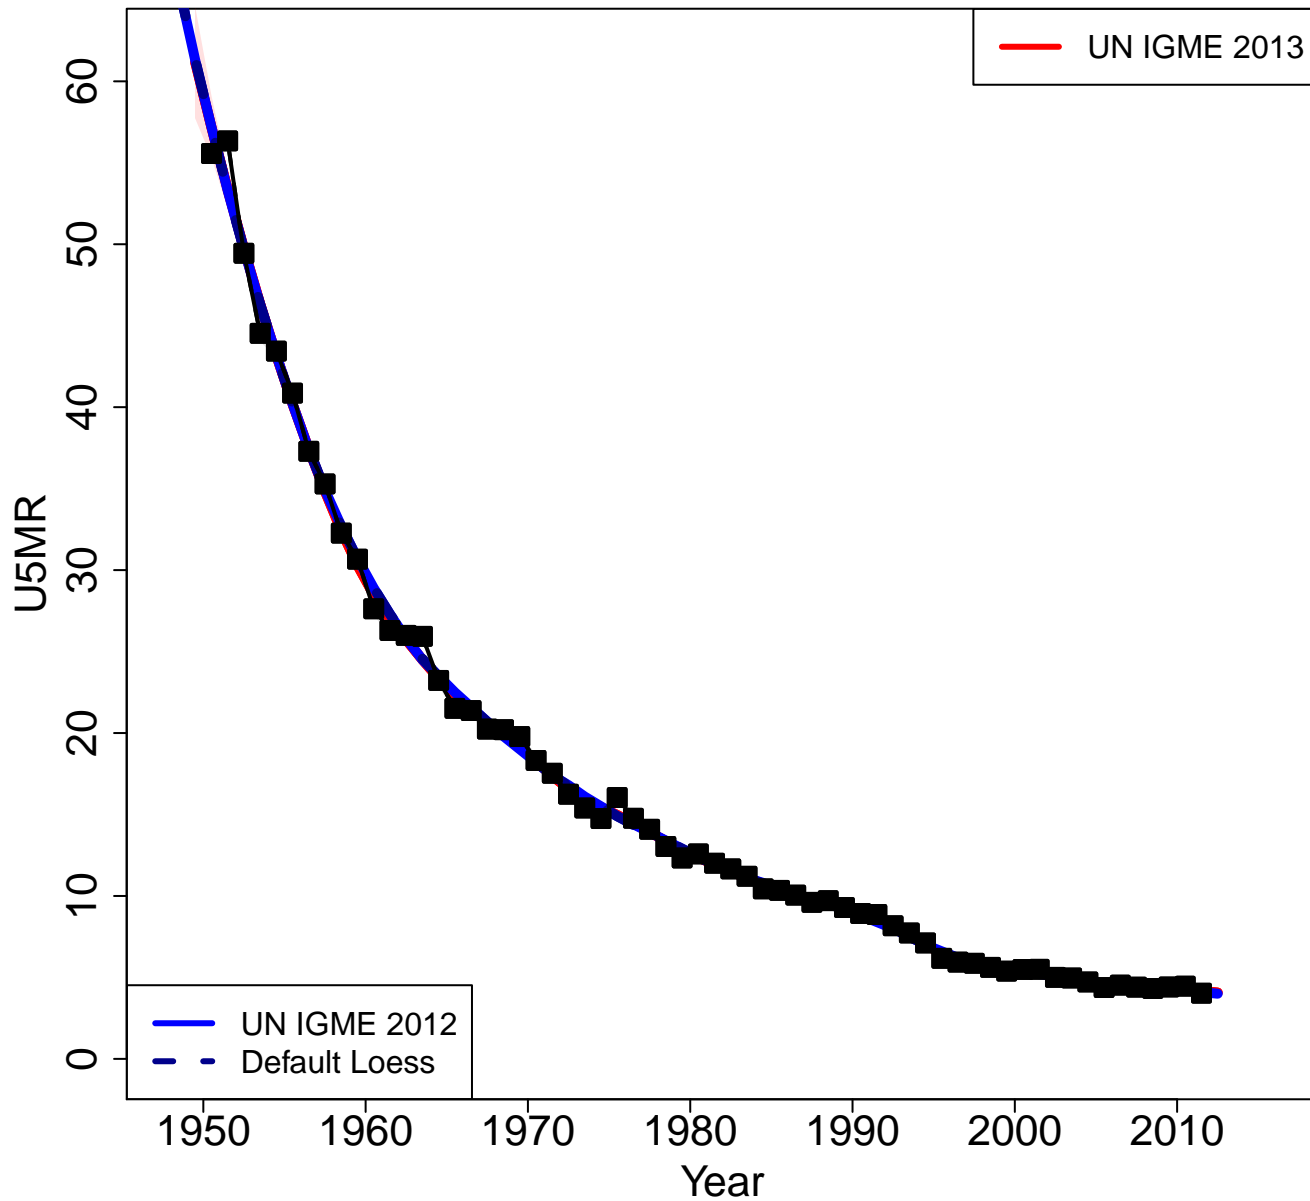

# Zoomed in

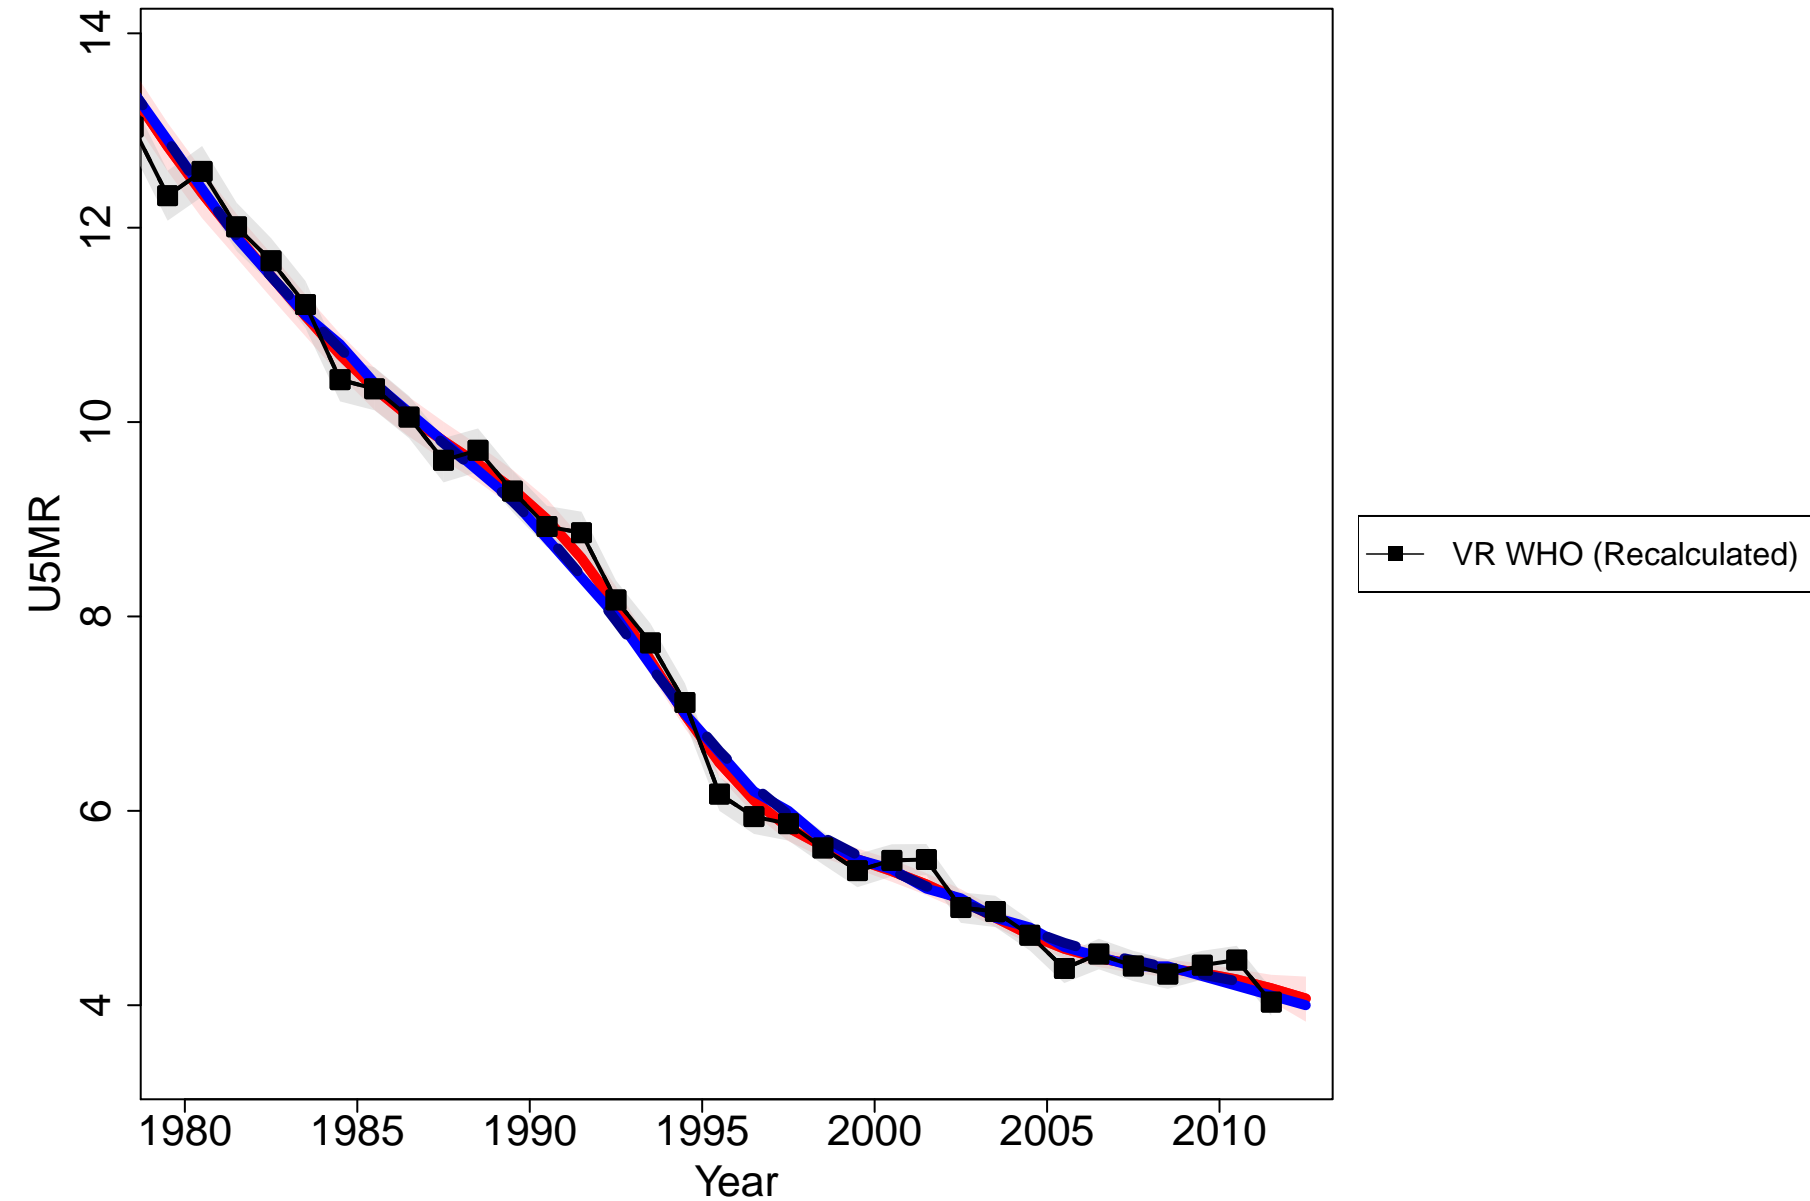

# Germany

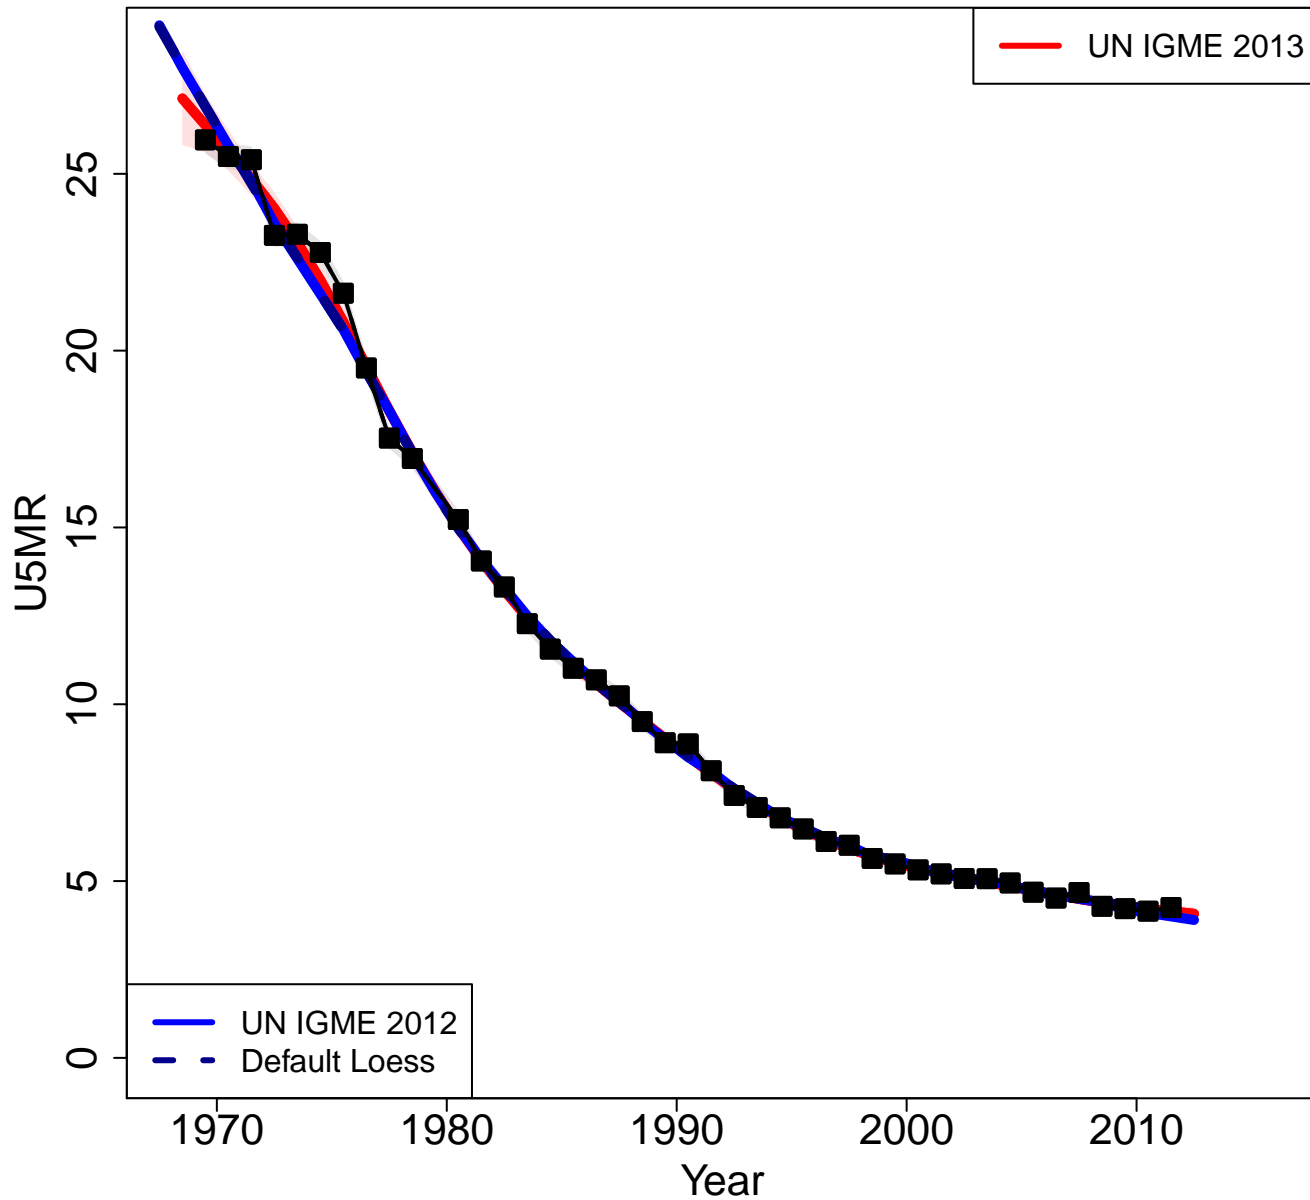

# Zoomed in

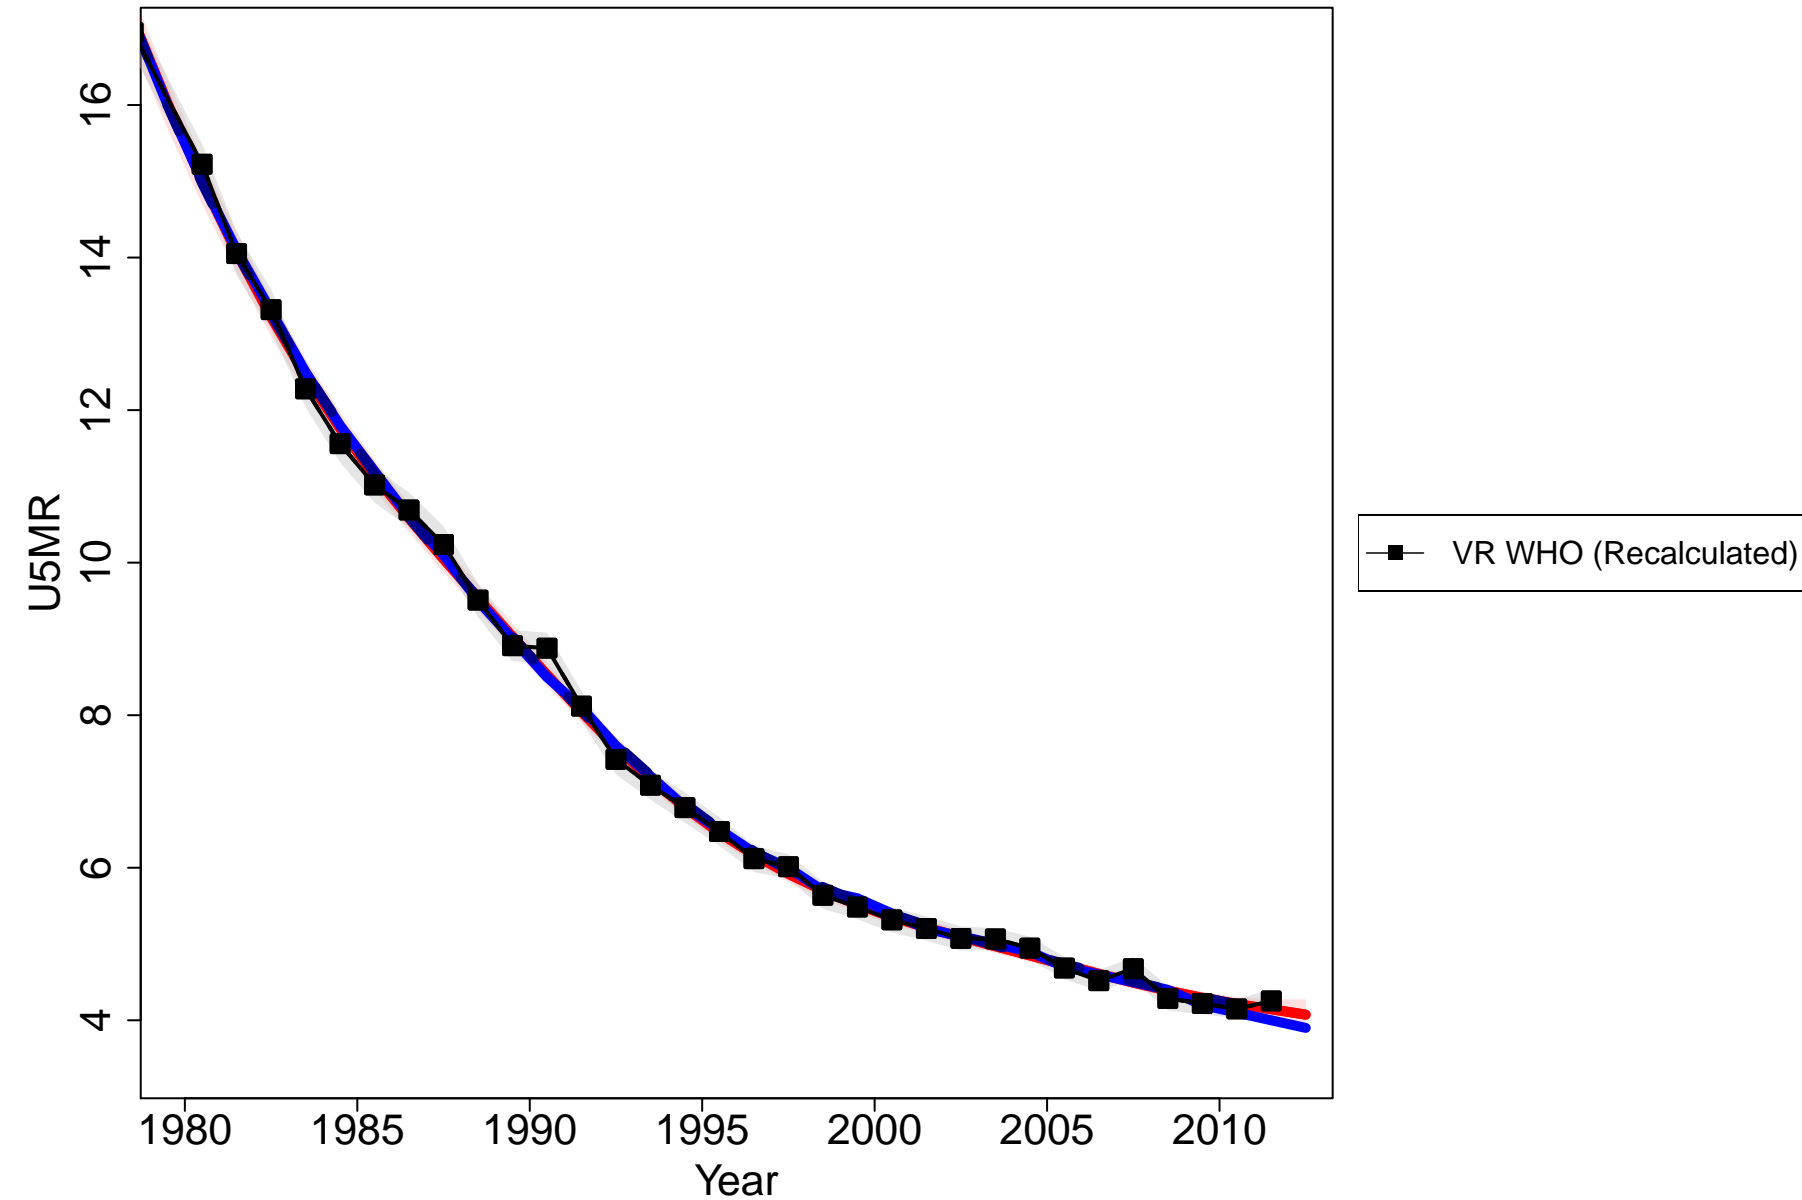

# Greece

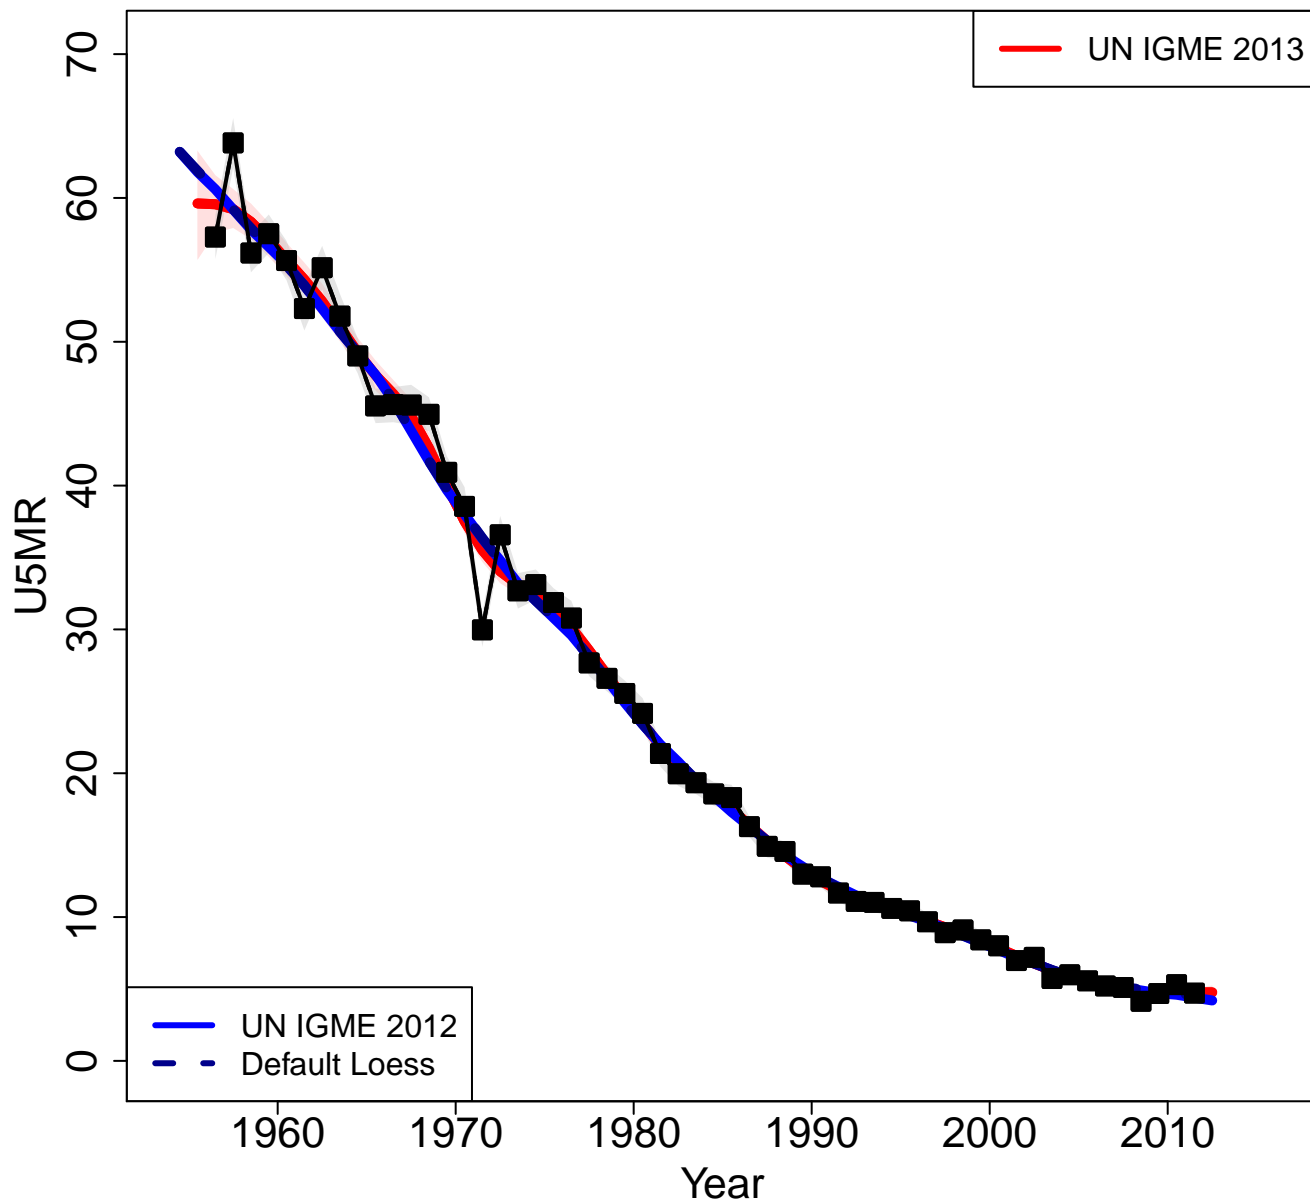

# Zoomed in

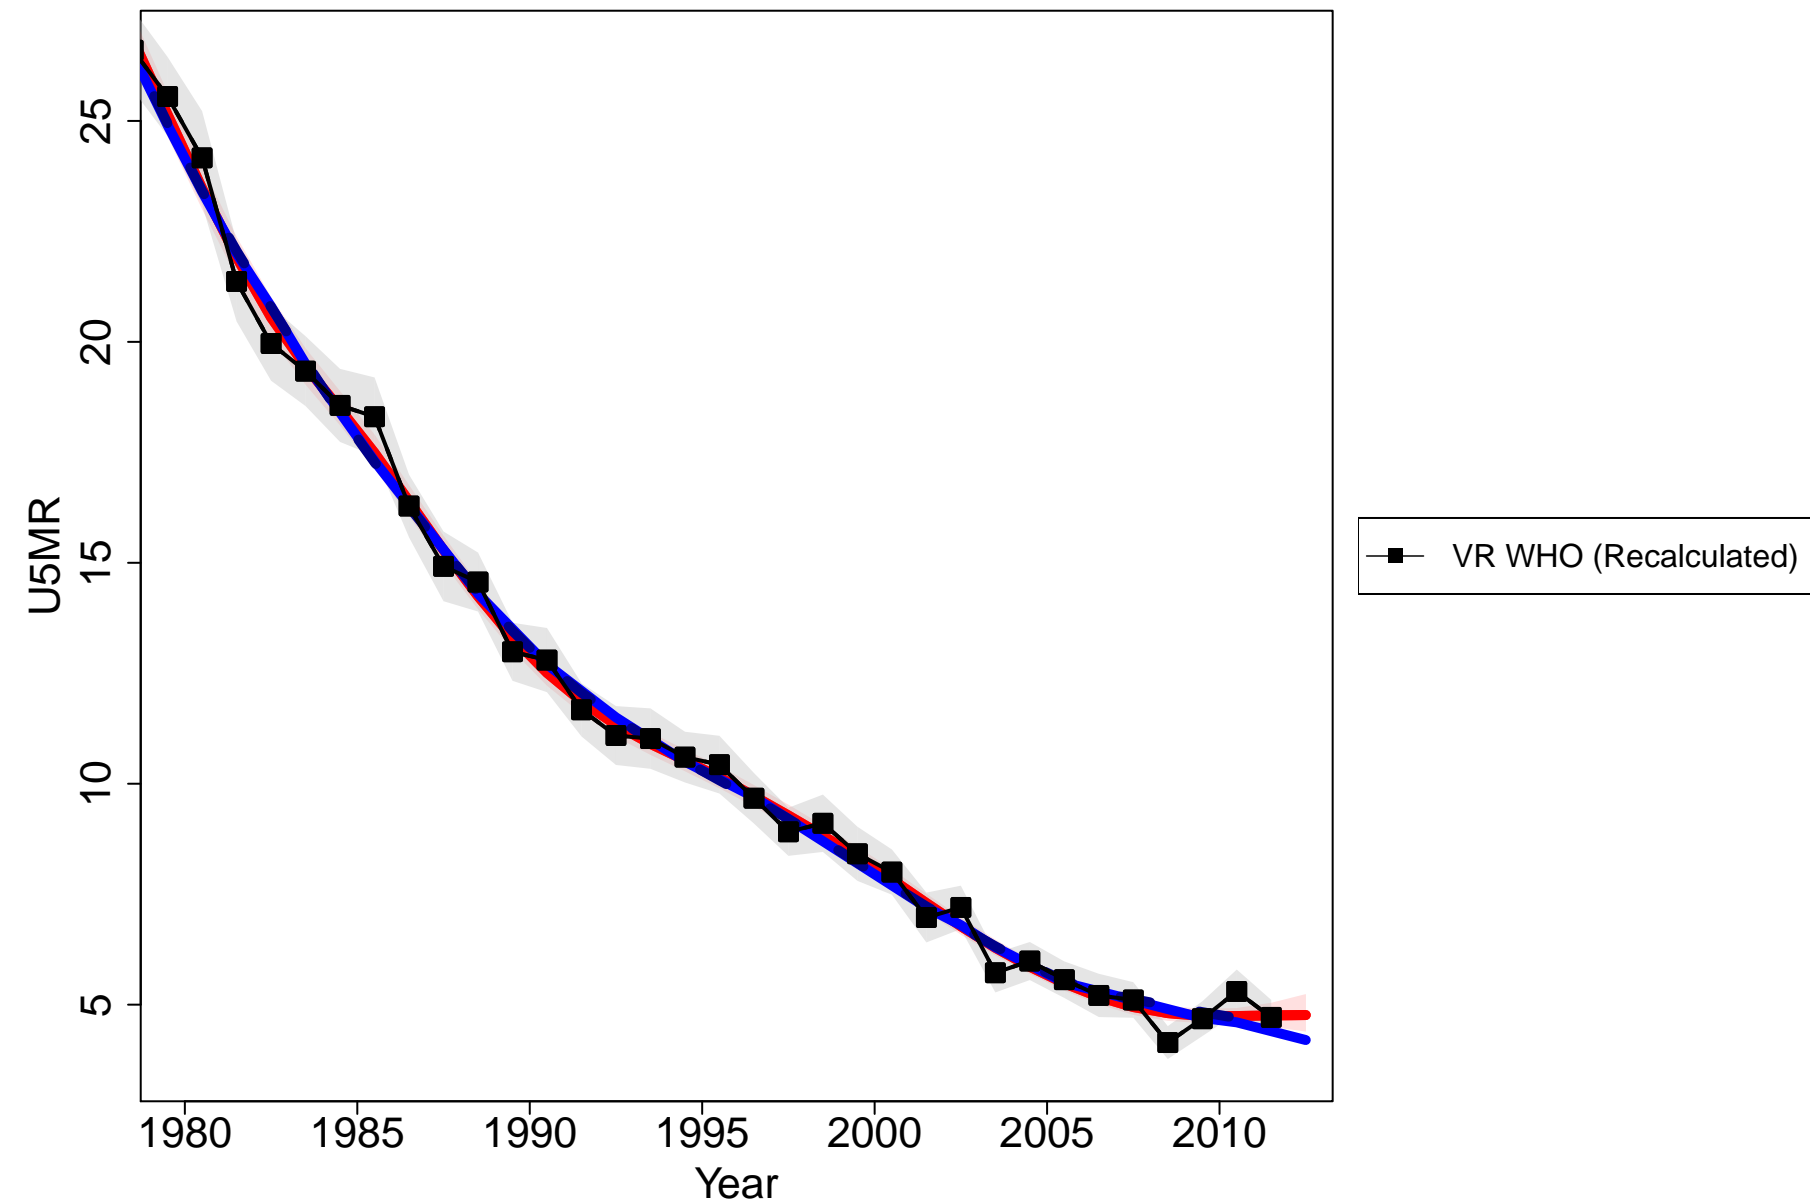

# Hungary

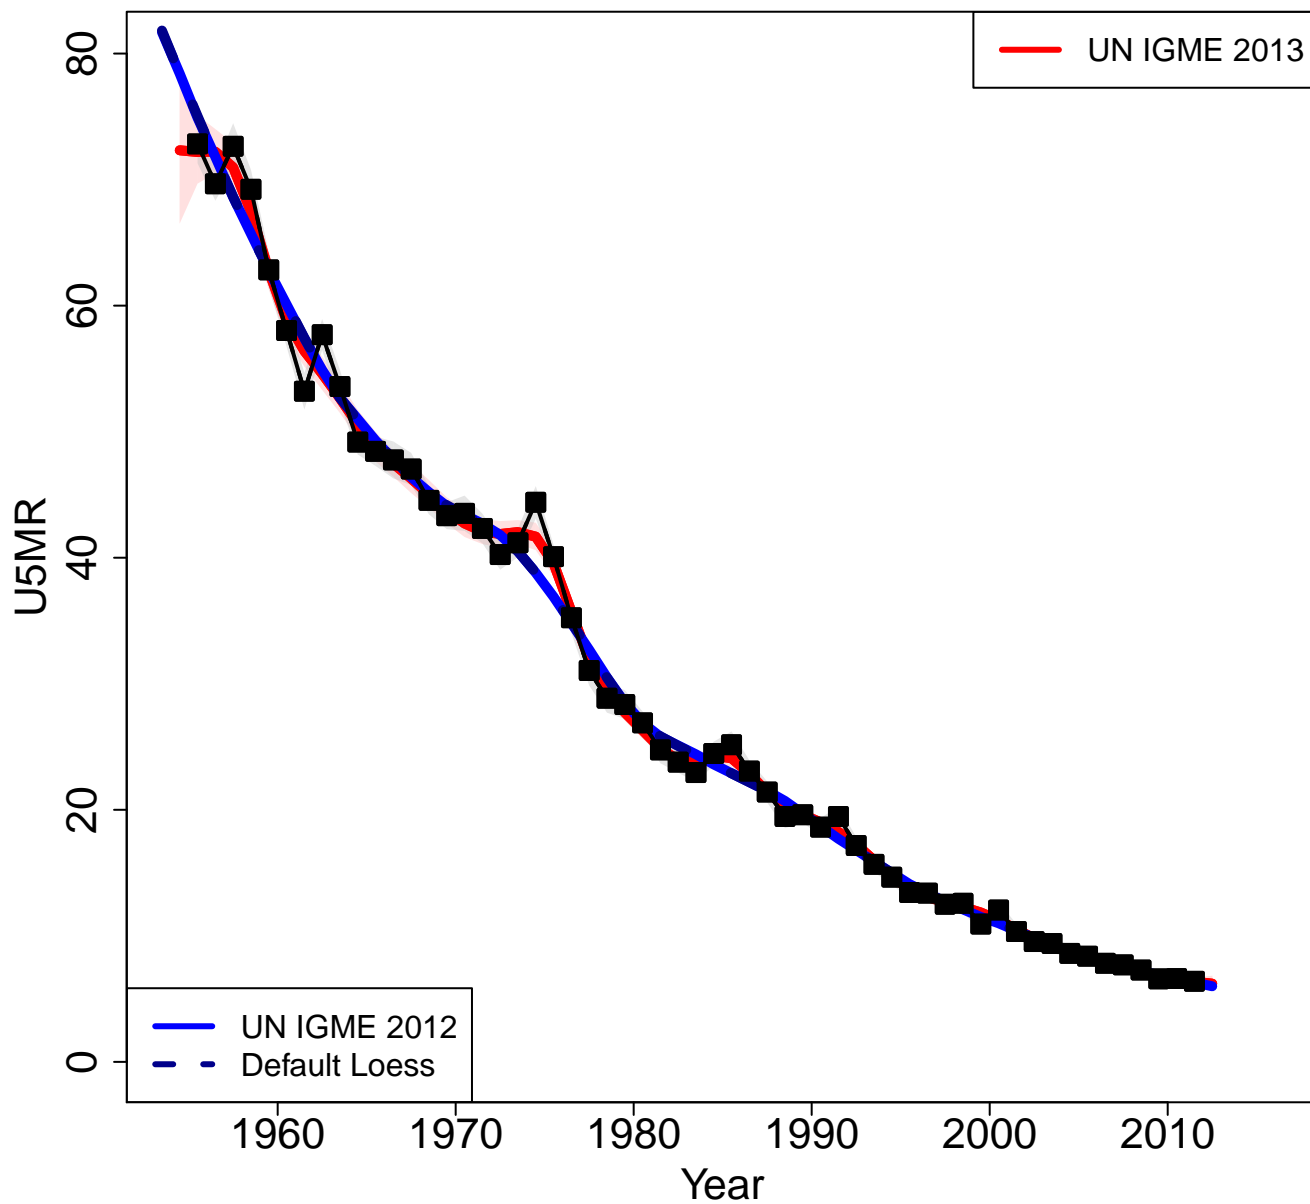

# Zoomed in

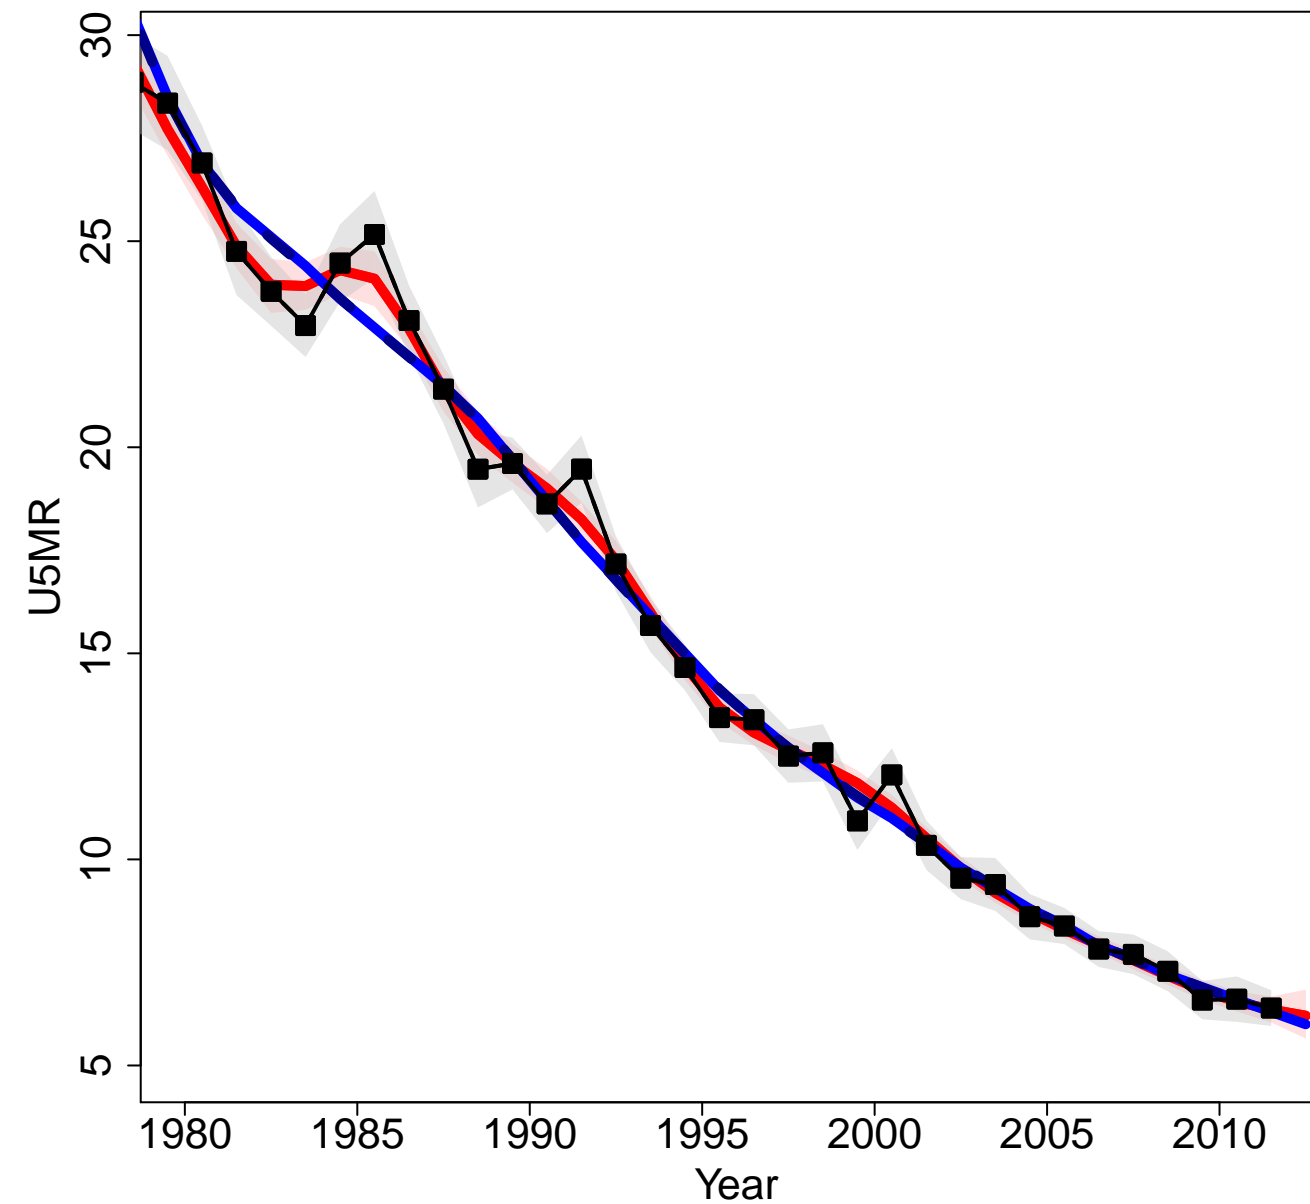

# Iceland

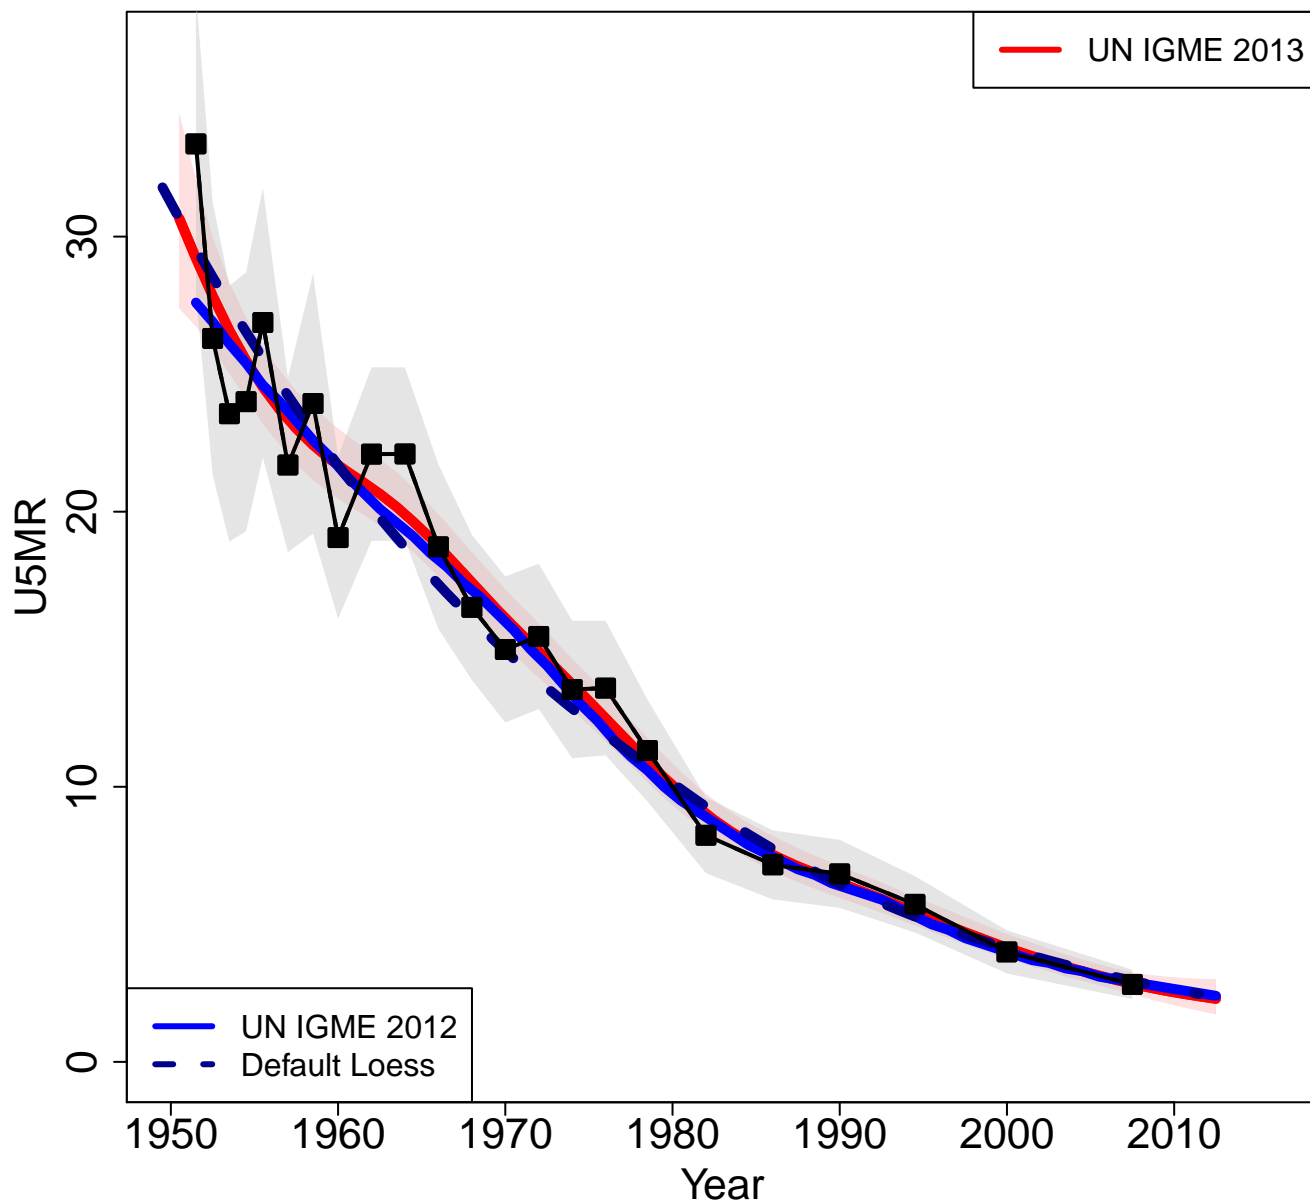

# Zoomed in

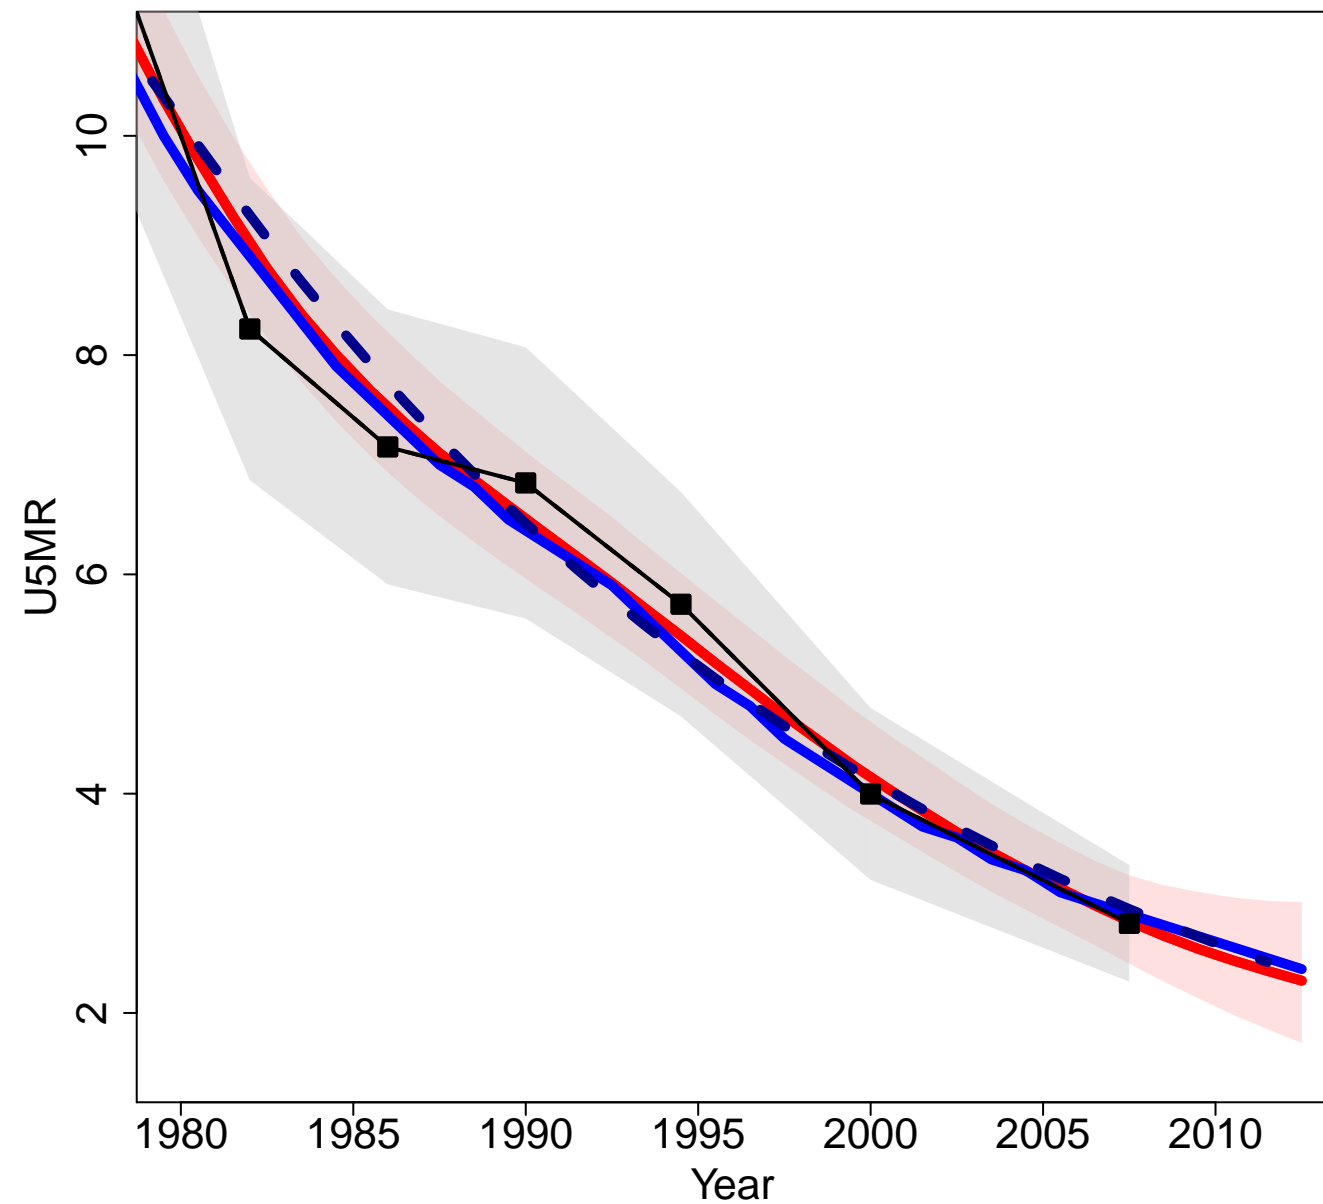

# Ireland

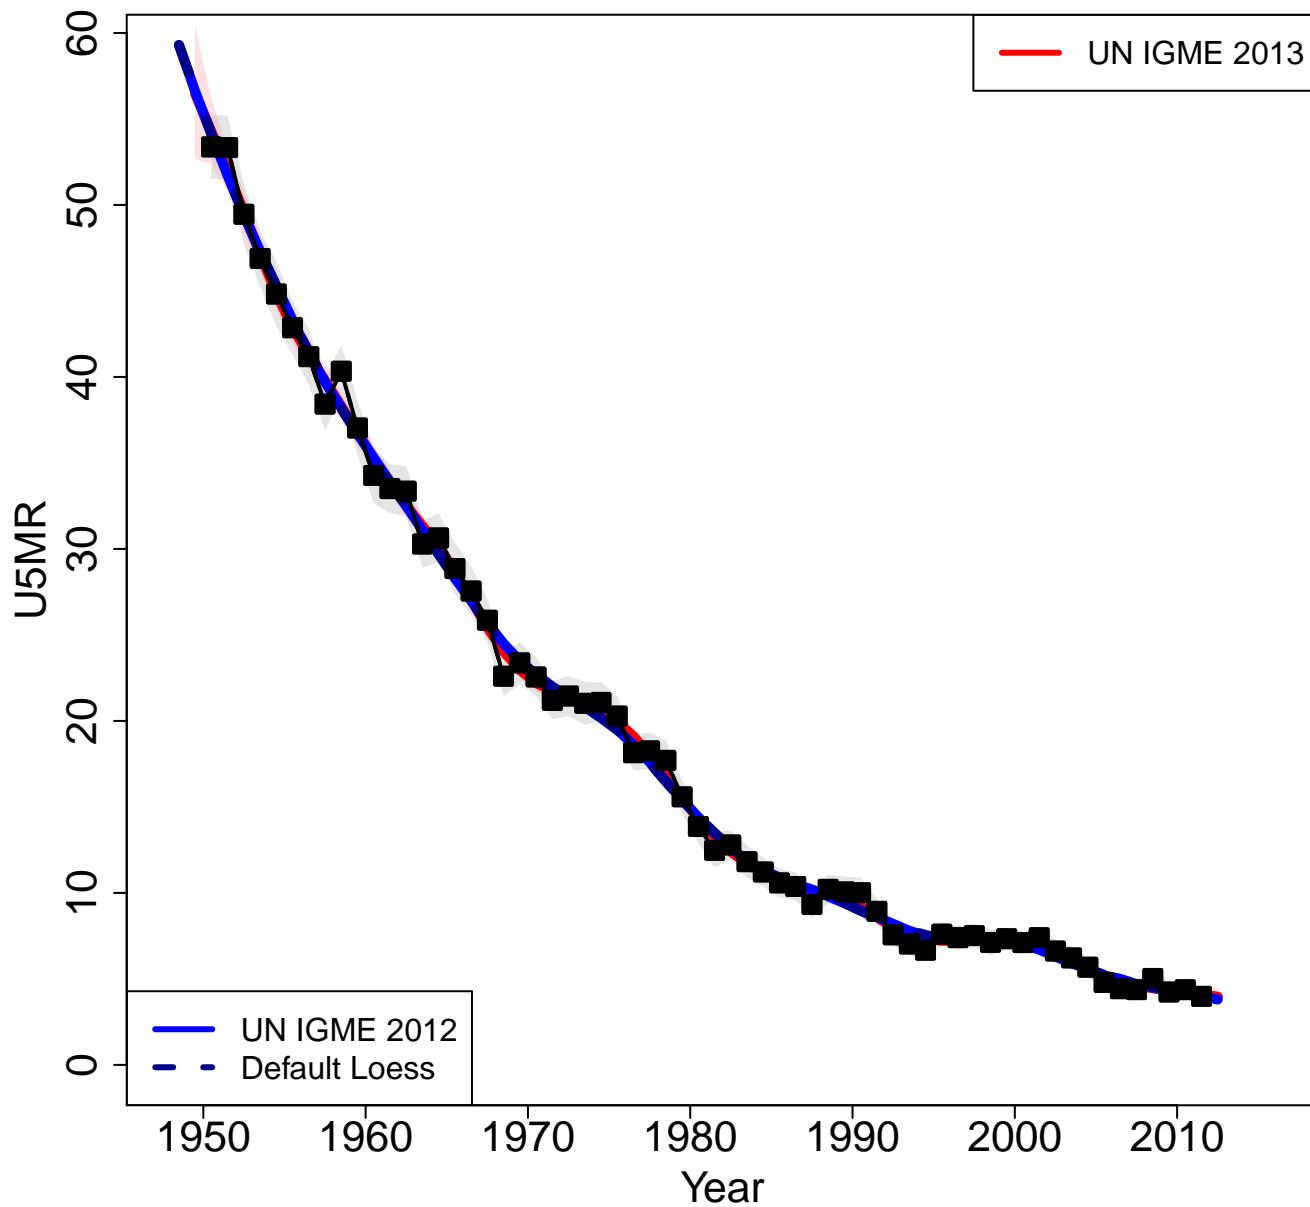

# Zoomed in

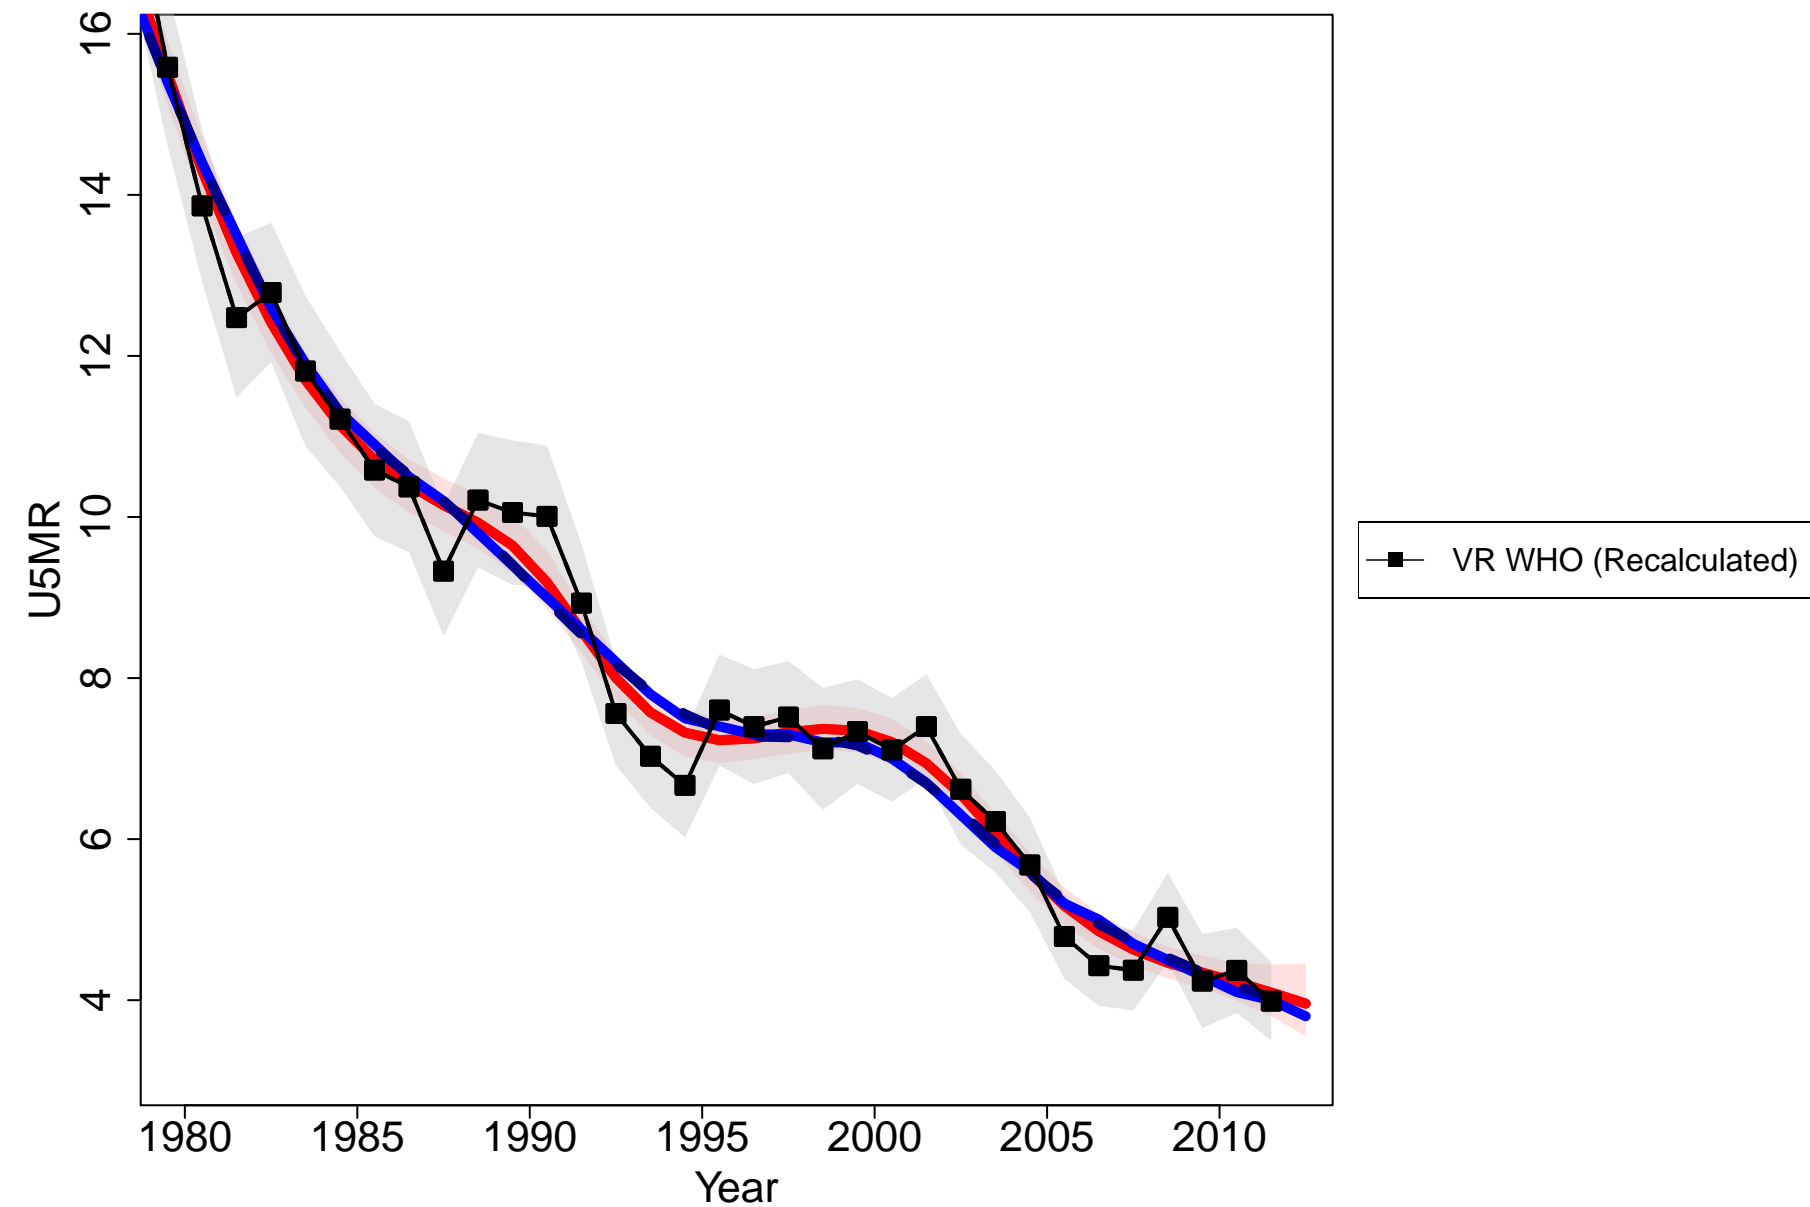



# Israel

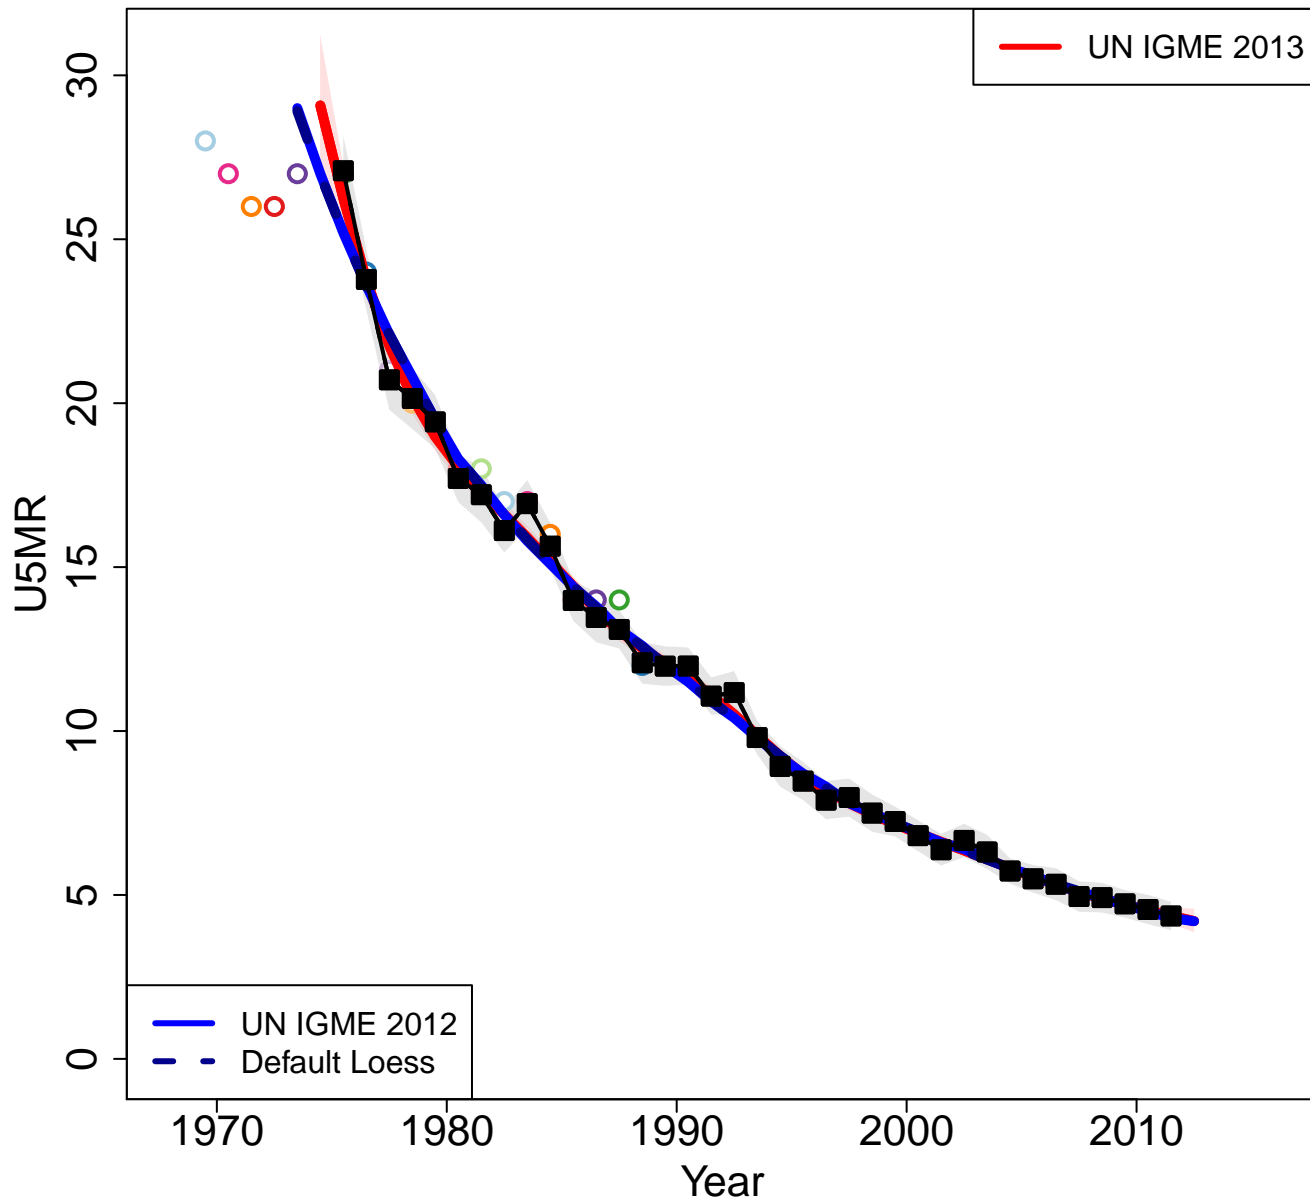

# Zoomed in

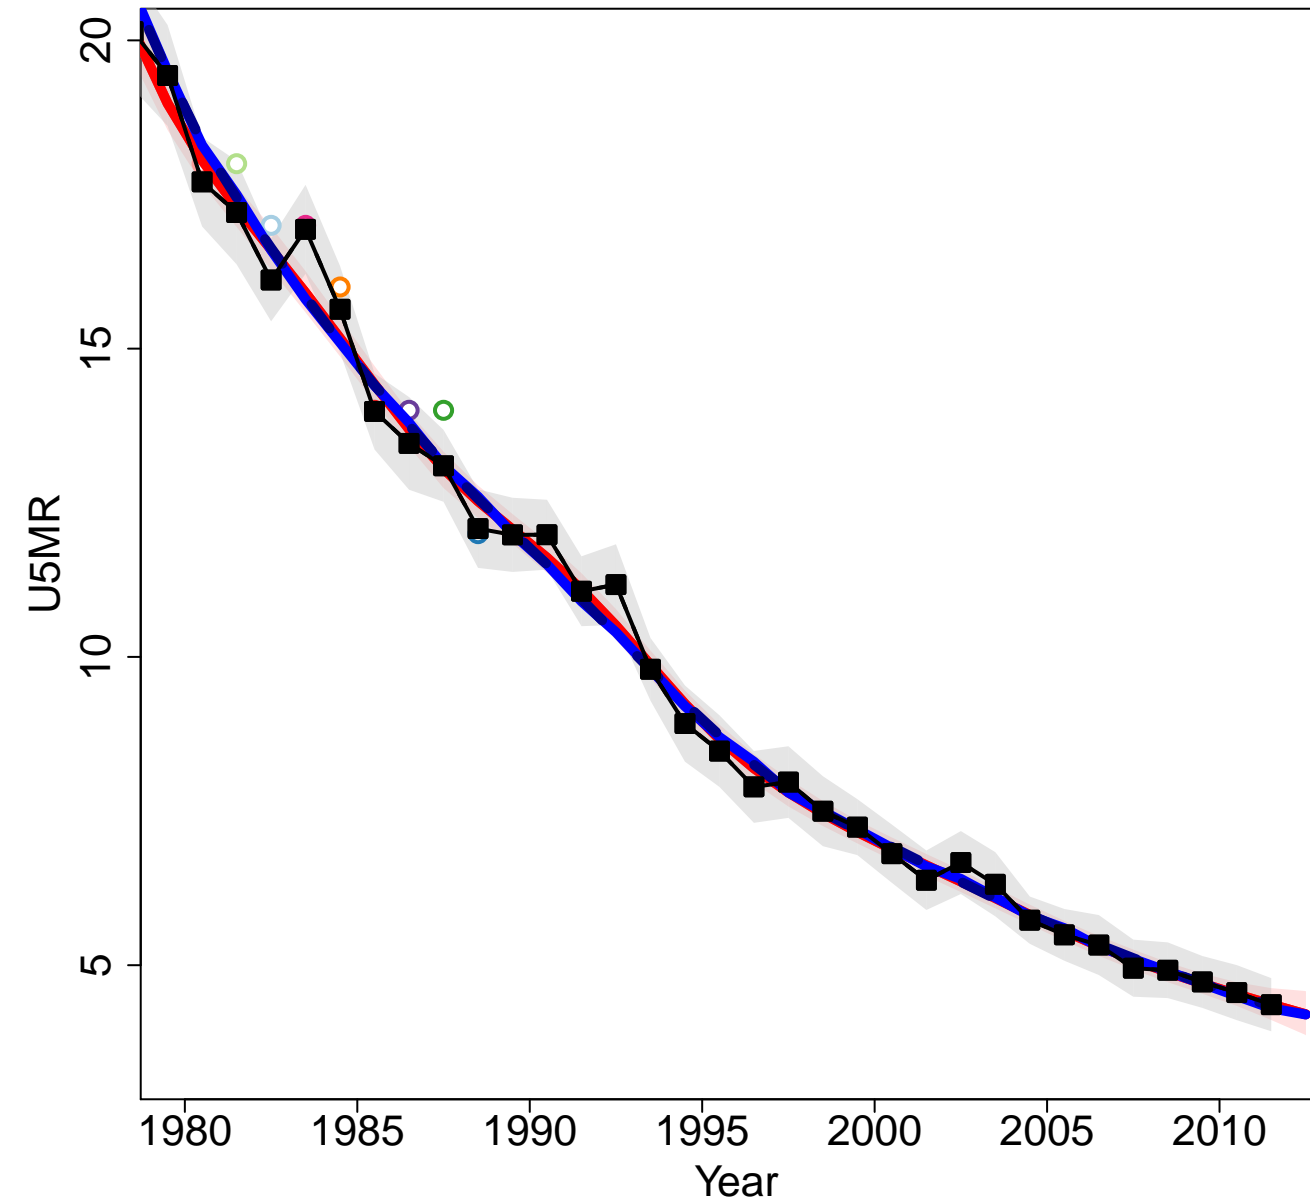

- National Life table 1969–1988 1969 (Others Life Table)
- National Life table 1969–1988 1970 (Others Life Table)
- National Life table 1969–1988 1971 (Others Life Table)
- National Life table 1969–1988 1972 (Others Life Table)
- National Life table 1969–1988 1973 (Others Life Table)
- National Life table 1969–1988 1975 (Others Life Table)
- National Life table 1969–1988 1976 (Others Life Table)
- National Life table 1969–1988 1977 (Others Life Table)
- National Life table 1969–1988 1978 (Others Life Table)
- National Life table 1969–1988 1980 (Others Life Table)
- National Life table 1969–1988 1981 (Others Life Table)
- National Life table 1969–1988 1982 (Others Life Table)
- National Life table 1969–1988 1983 (Others Life Table)
- National Life table 1969–1988 1984 (Others Life Table)
- National Life table 1969–1988 1985 (Others Life Table)
- National Life table 1969–1988 1986 (Others Life Table)
- National Life table 1969–1988 1987 (Others Life Table)
- National Life table 1969–1988 1988 (Others Life Table)
- VR WHO (Recalculated)

# Italy

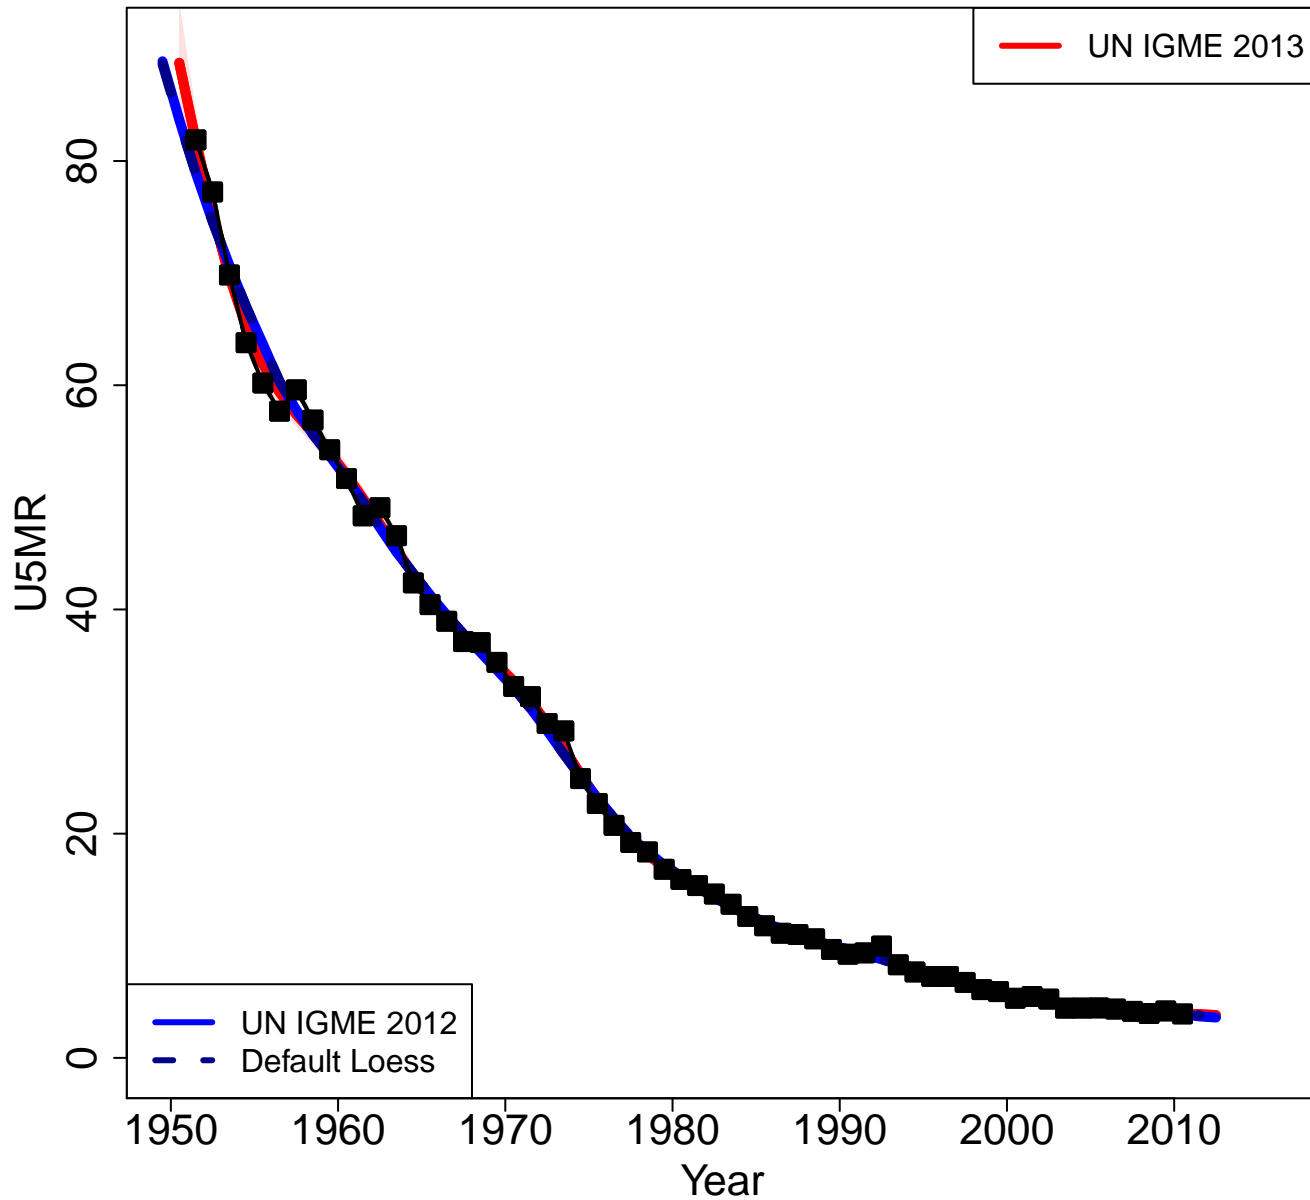

# Zoomed in

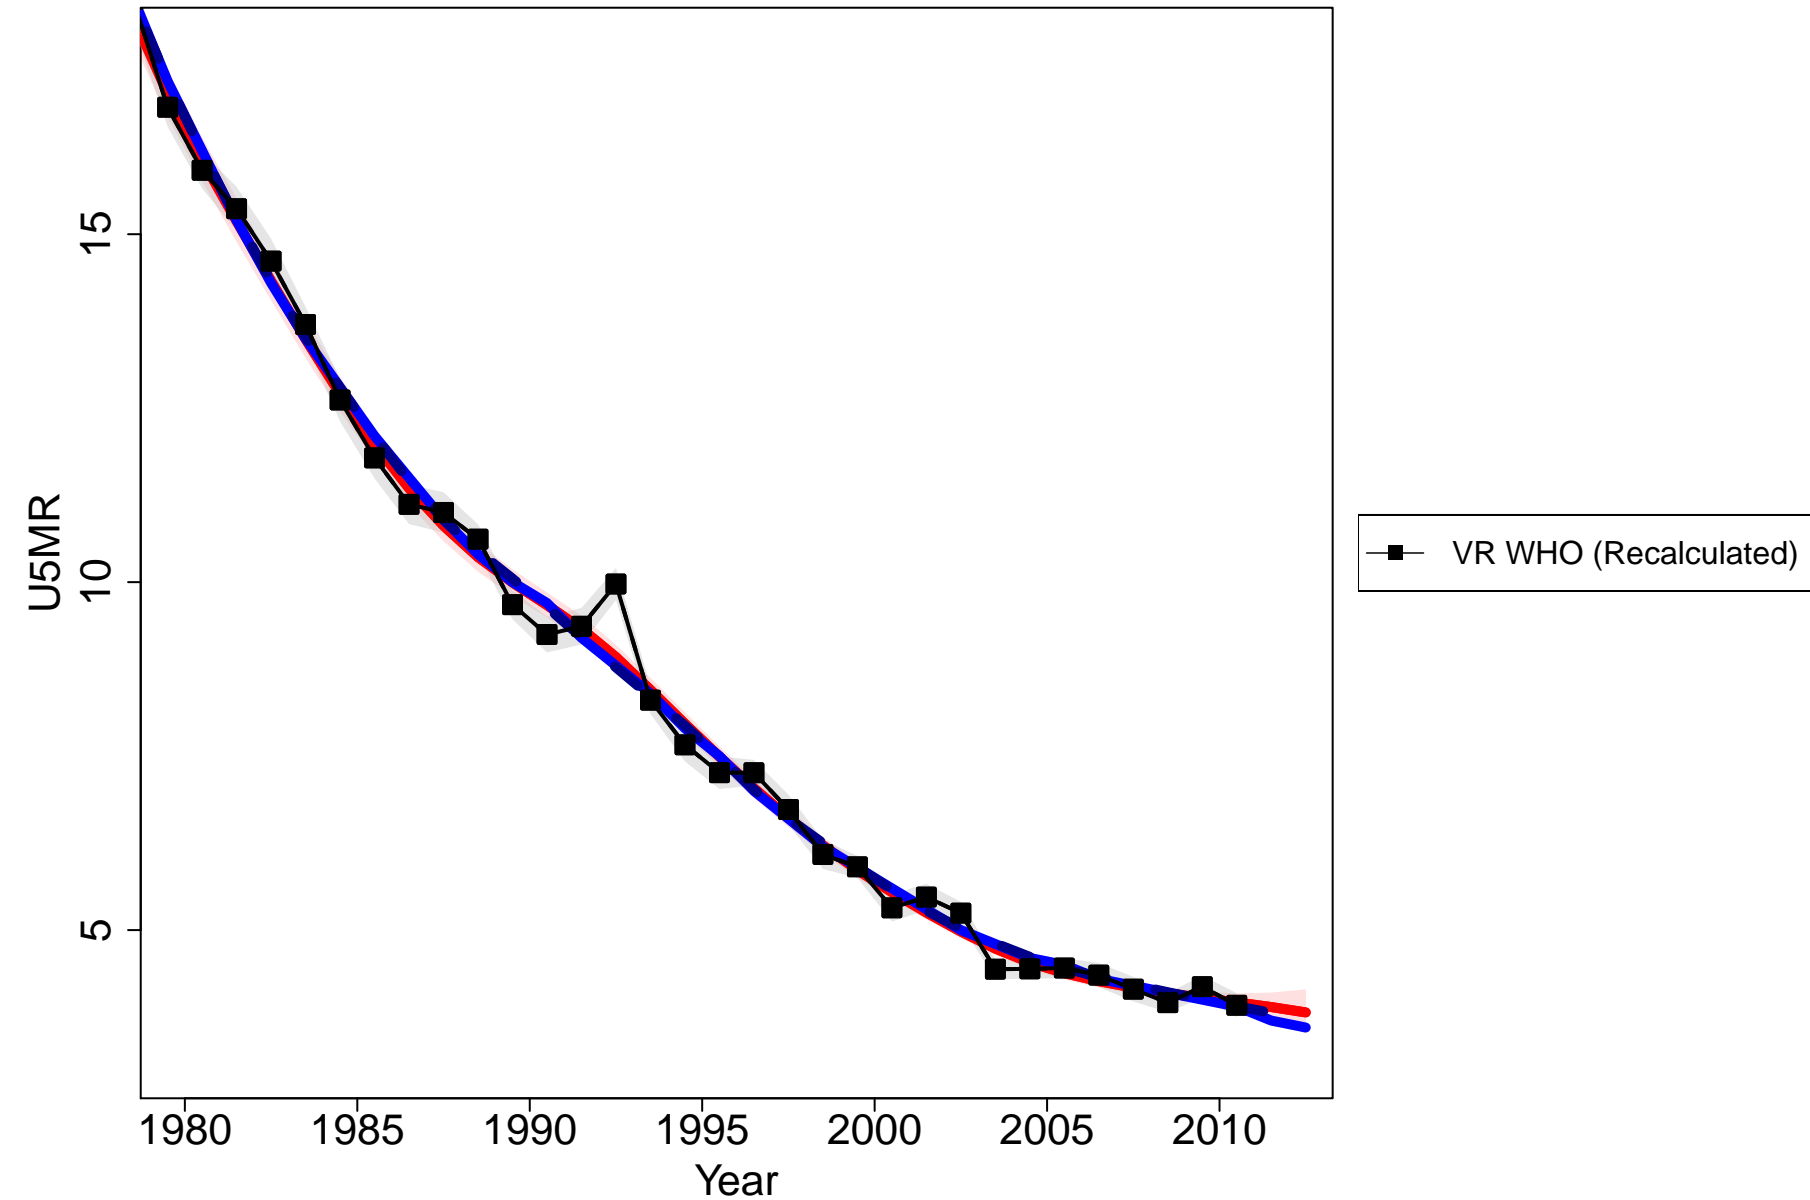

# Japan

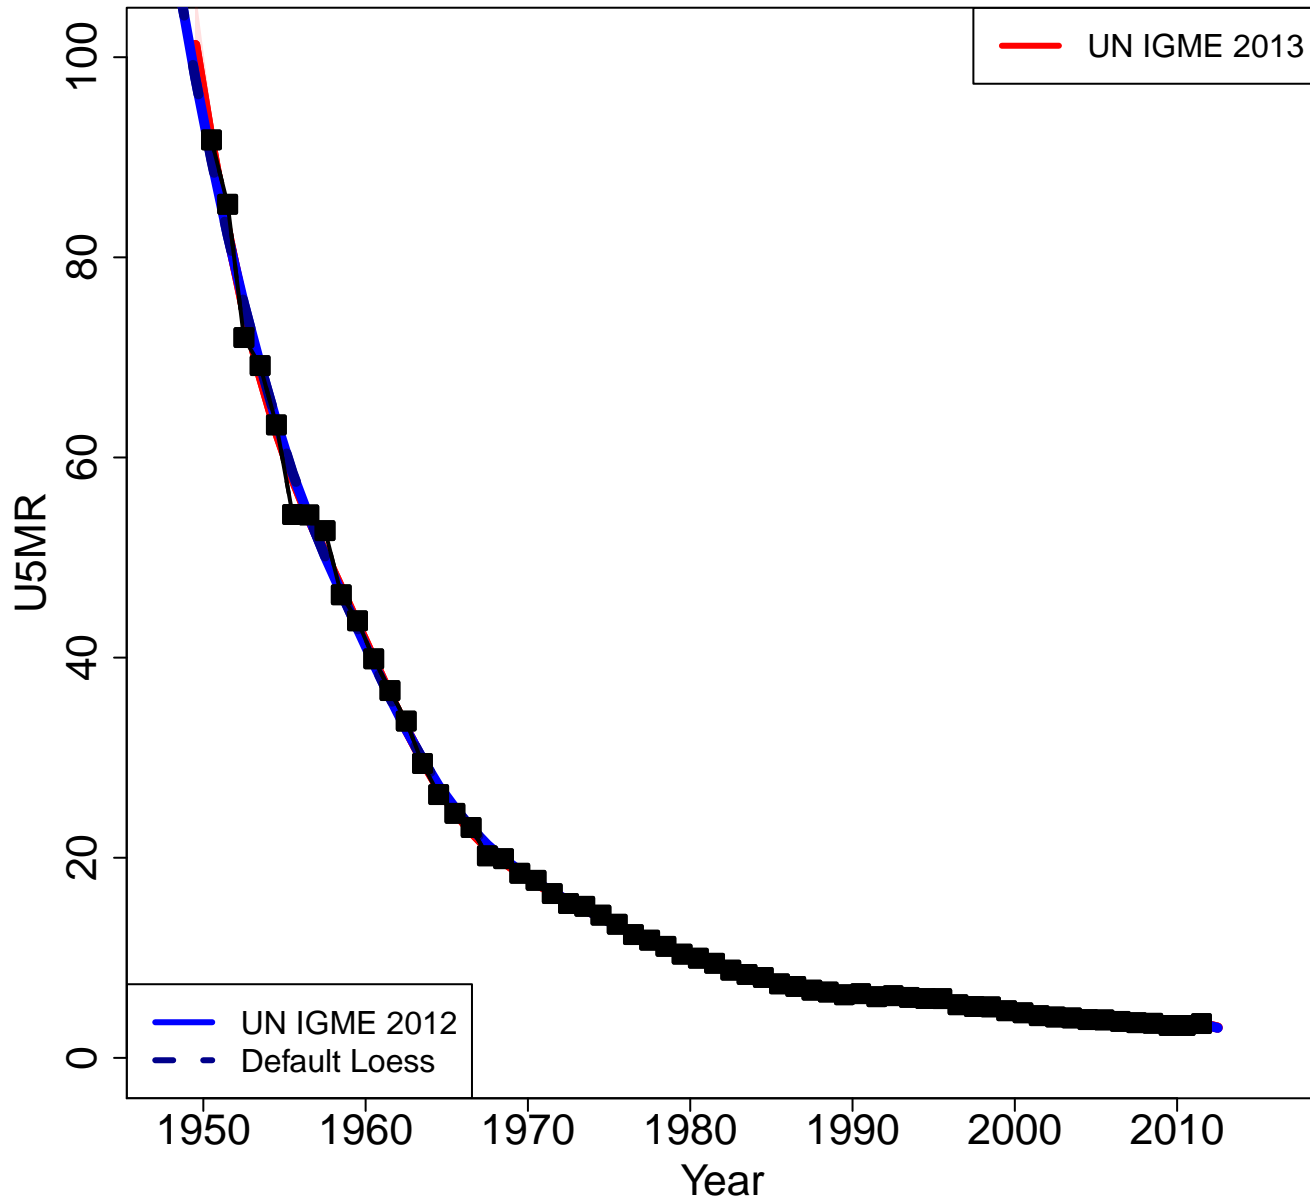

# Zoomed in

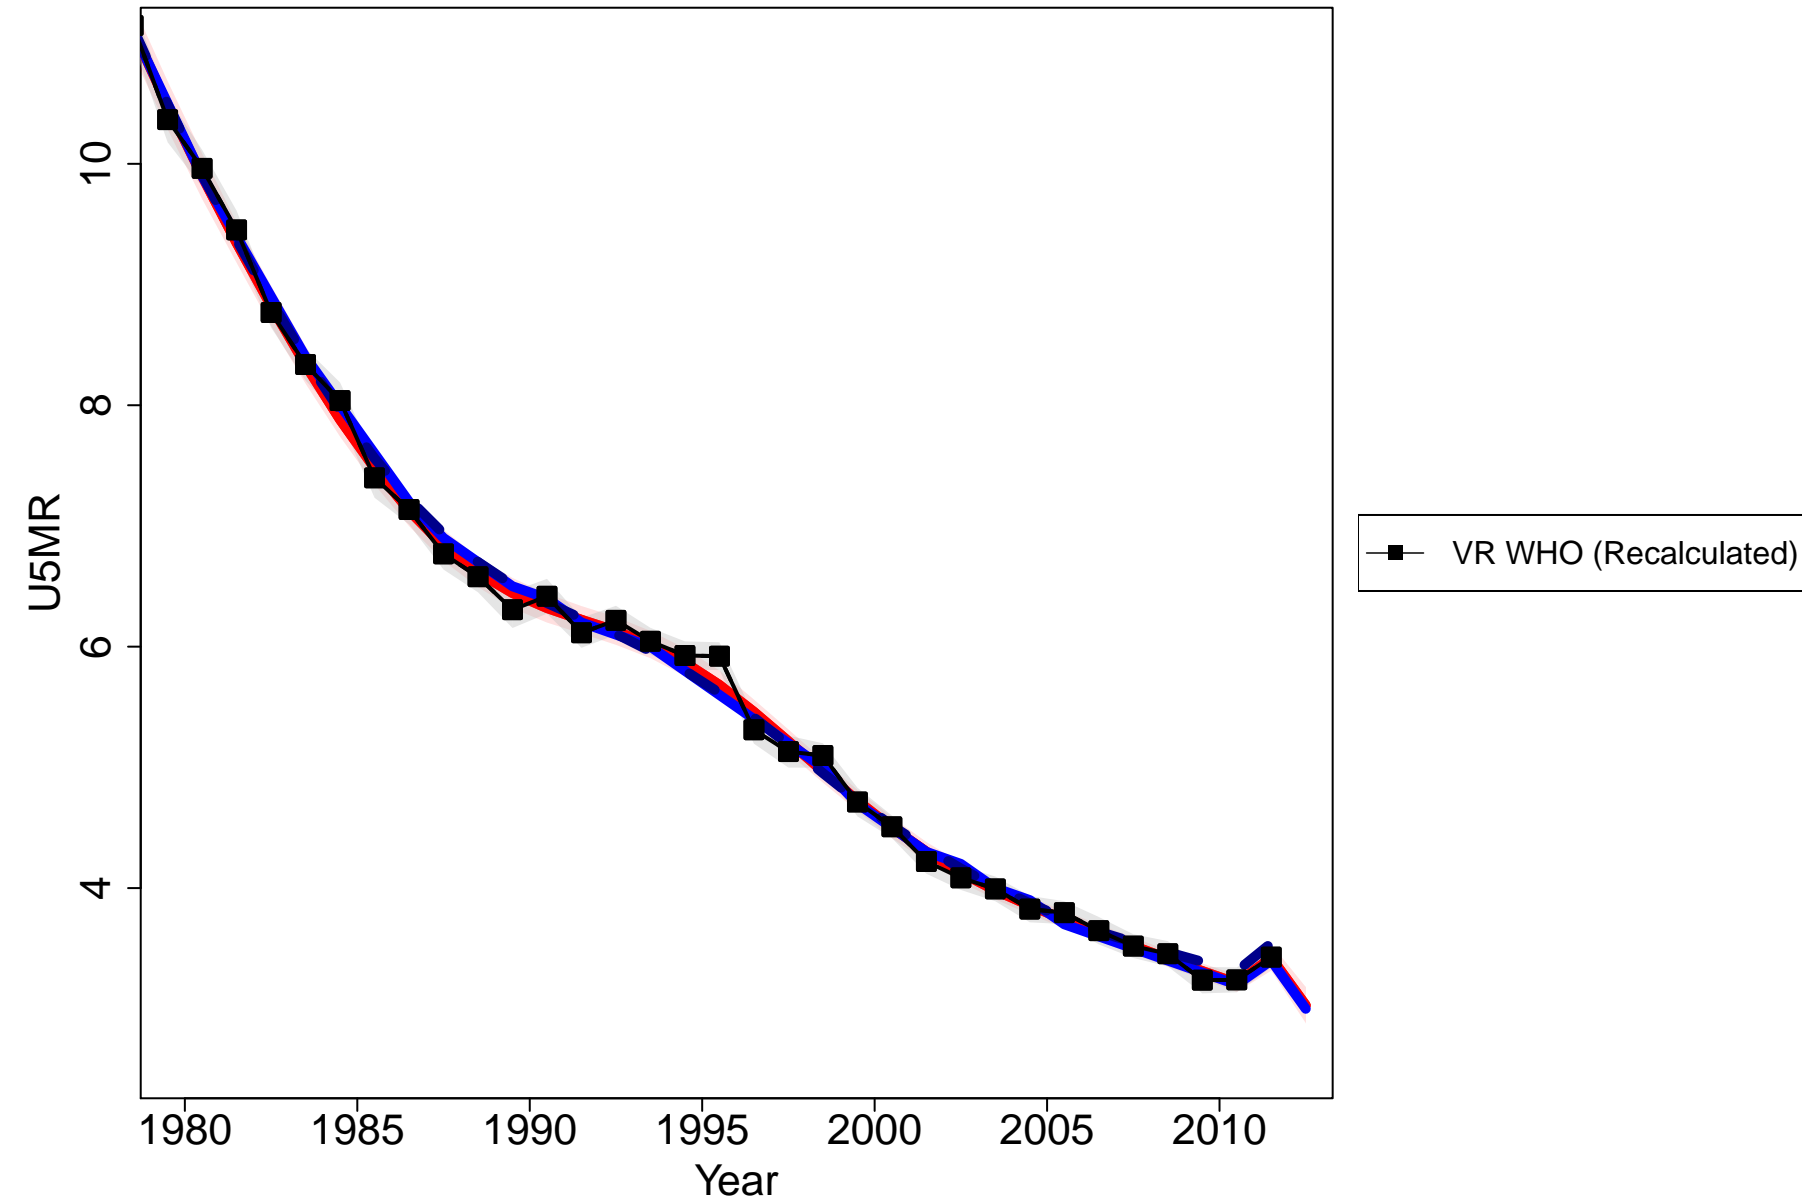

# Latvia

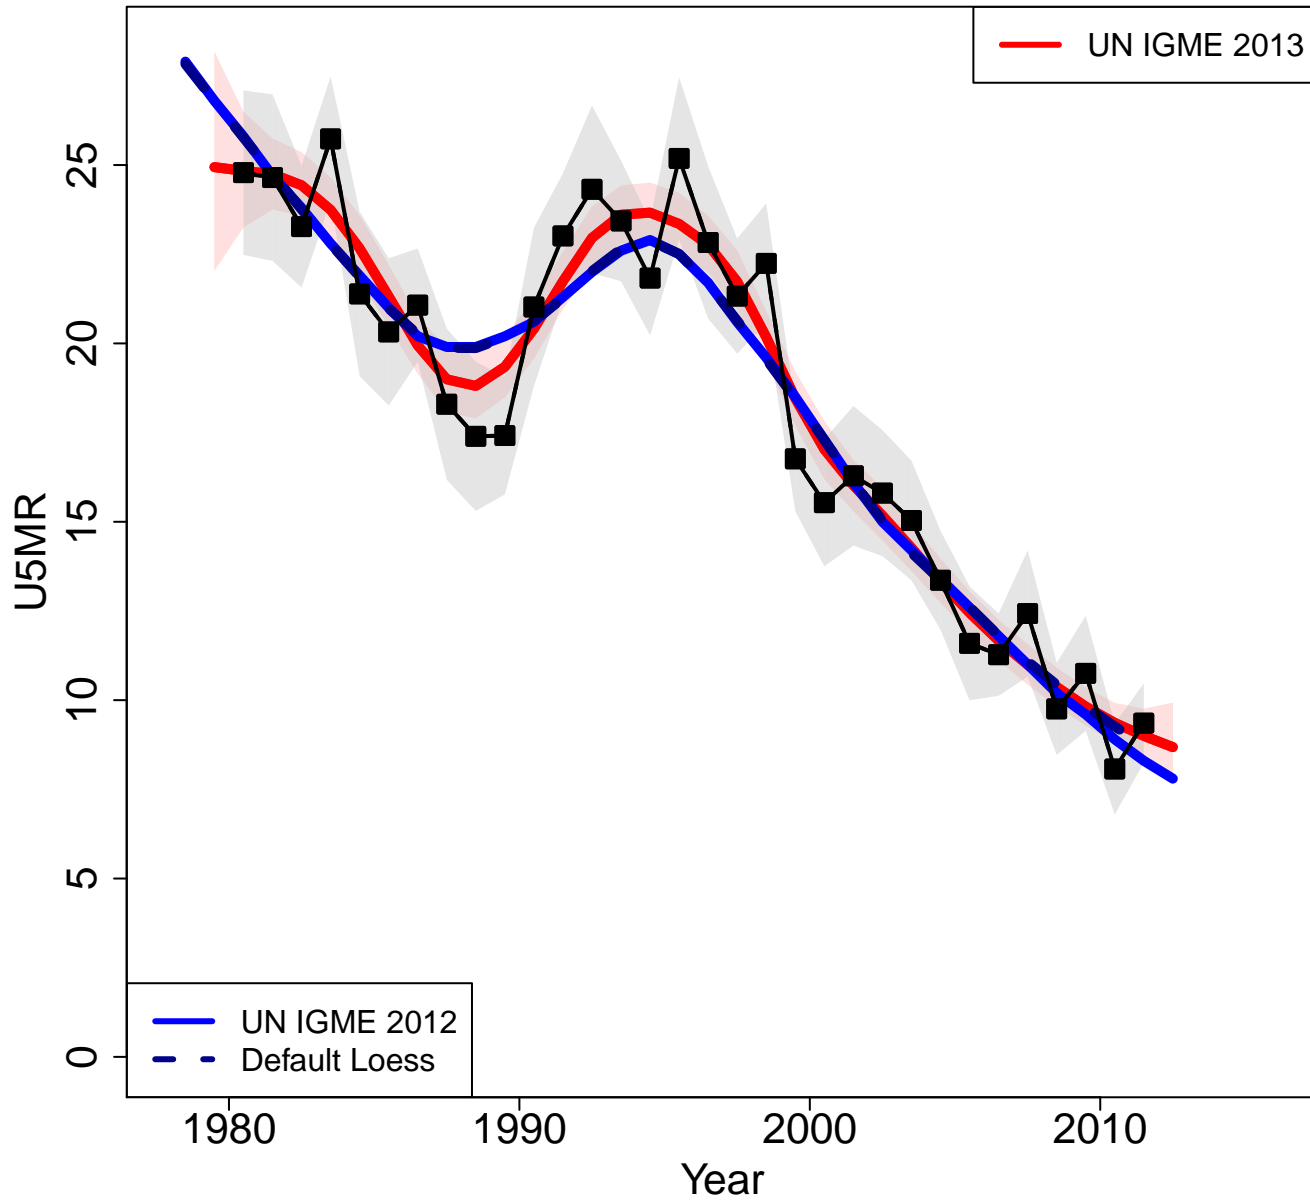

# Zoomed in

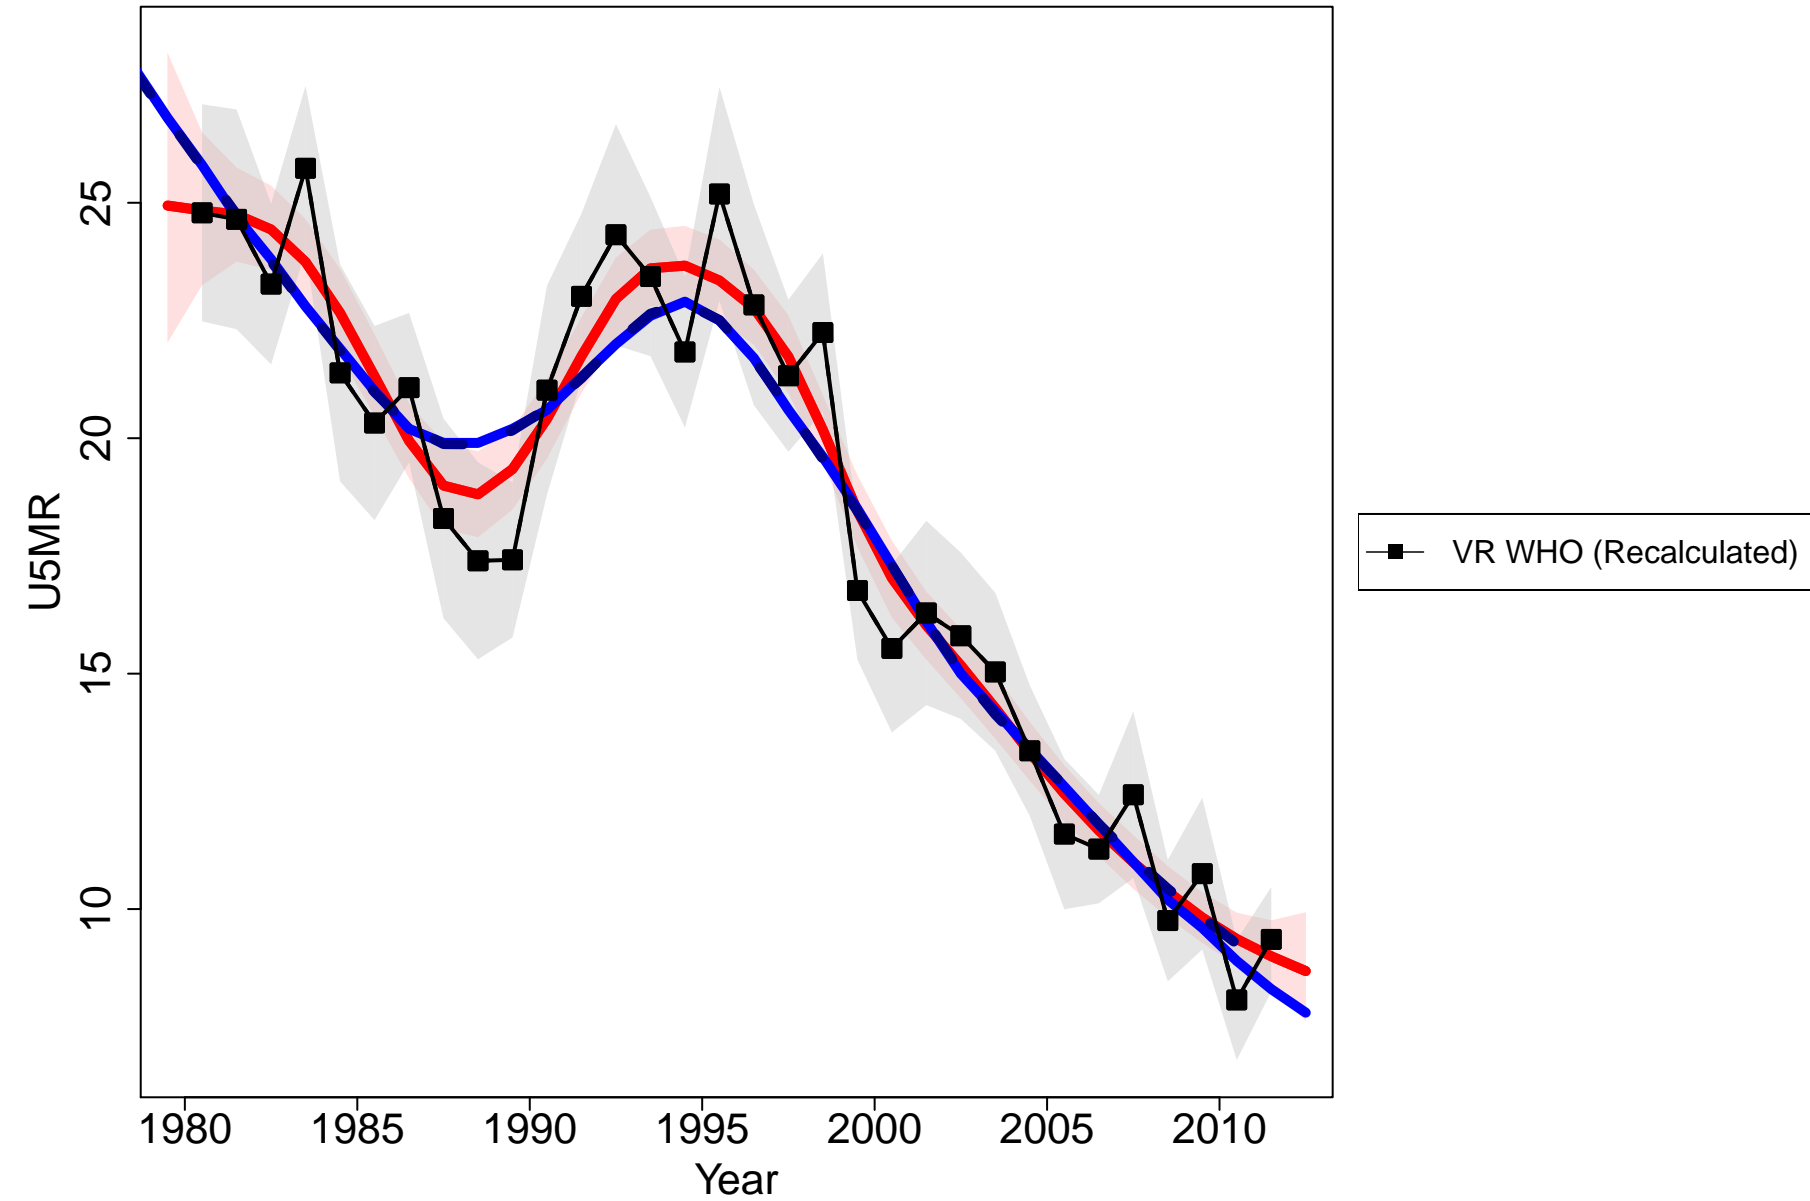

# Lithuania

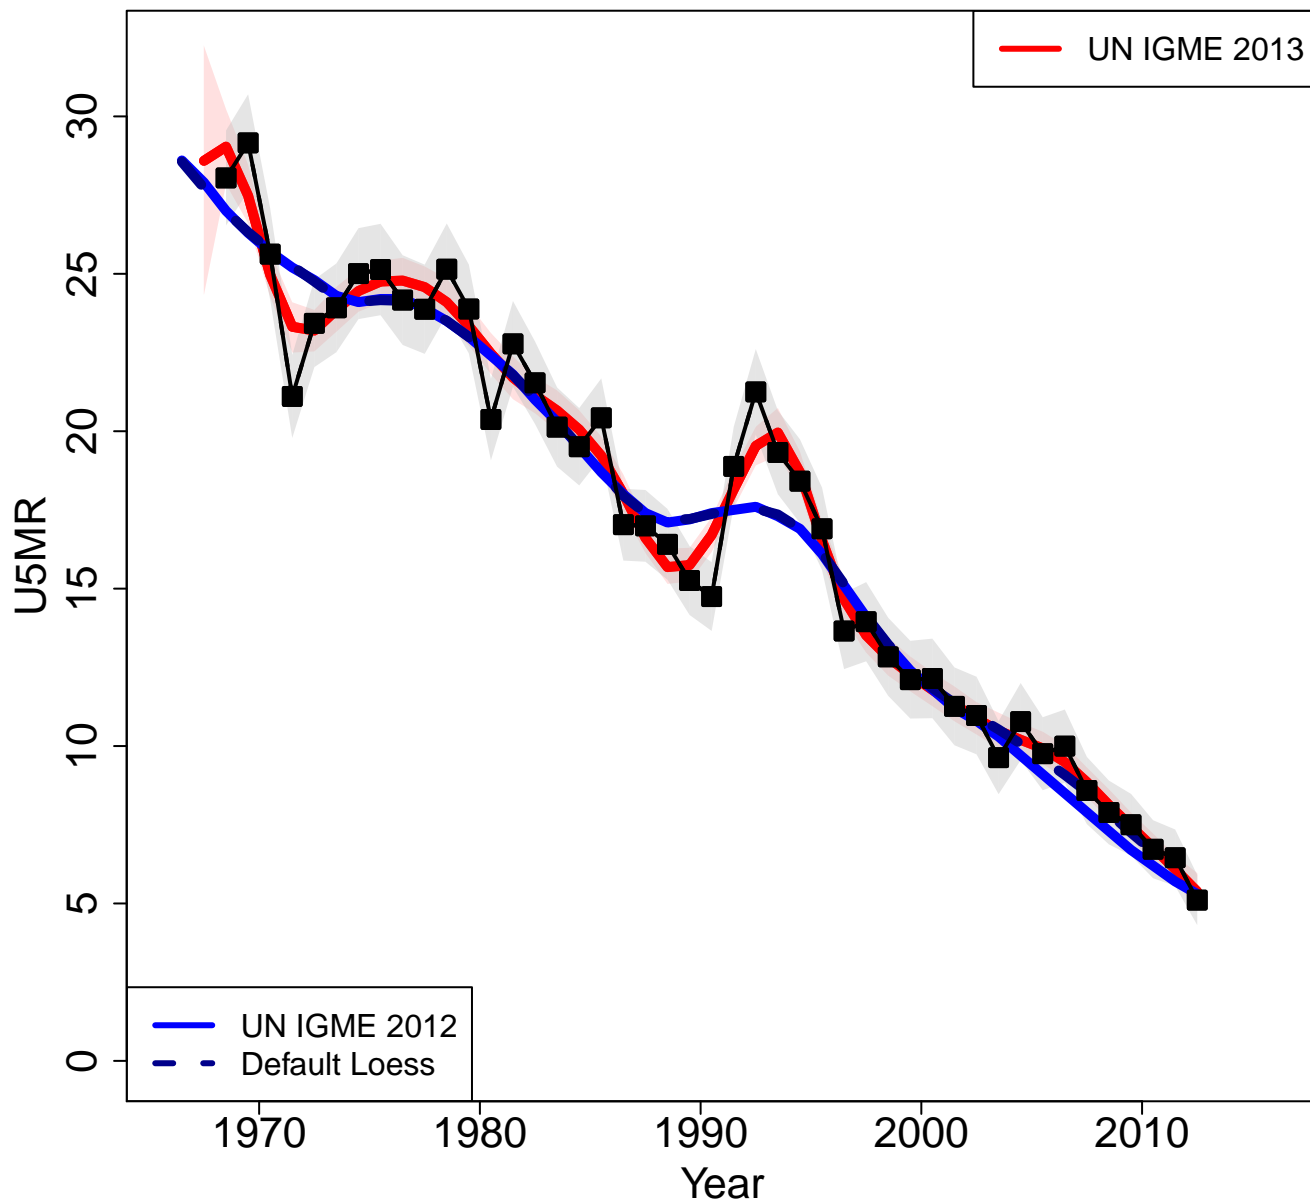

# Zoomed in

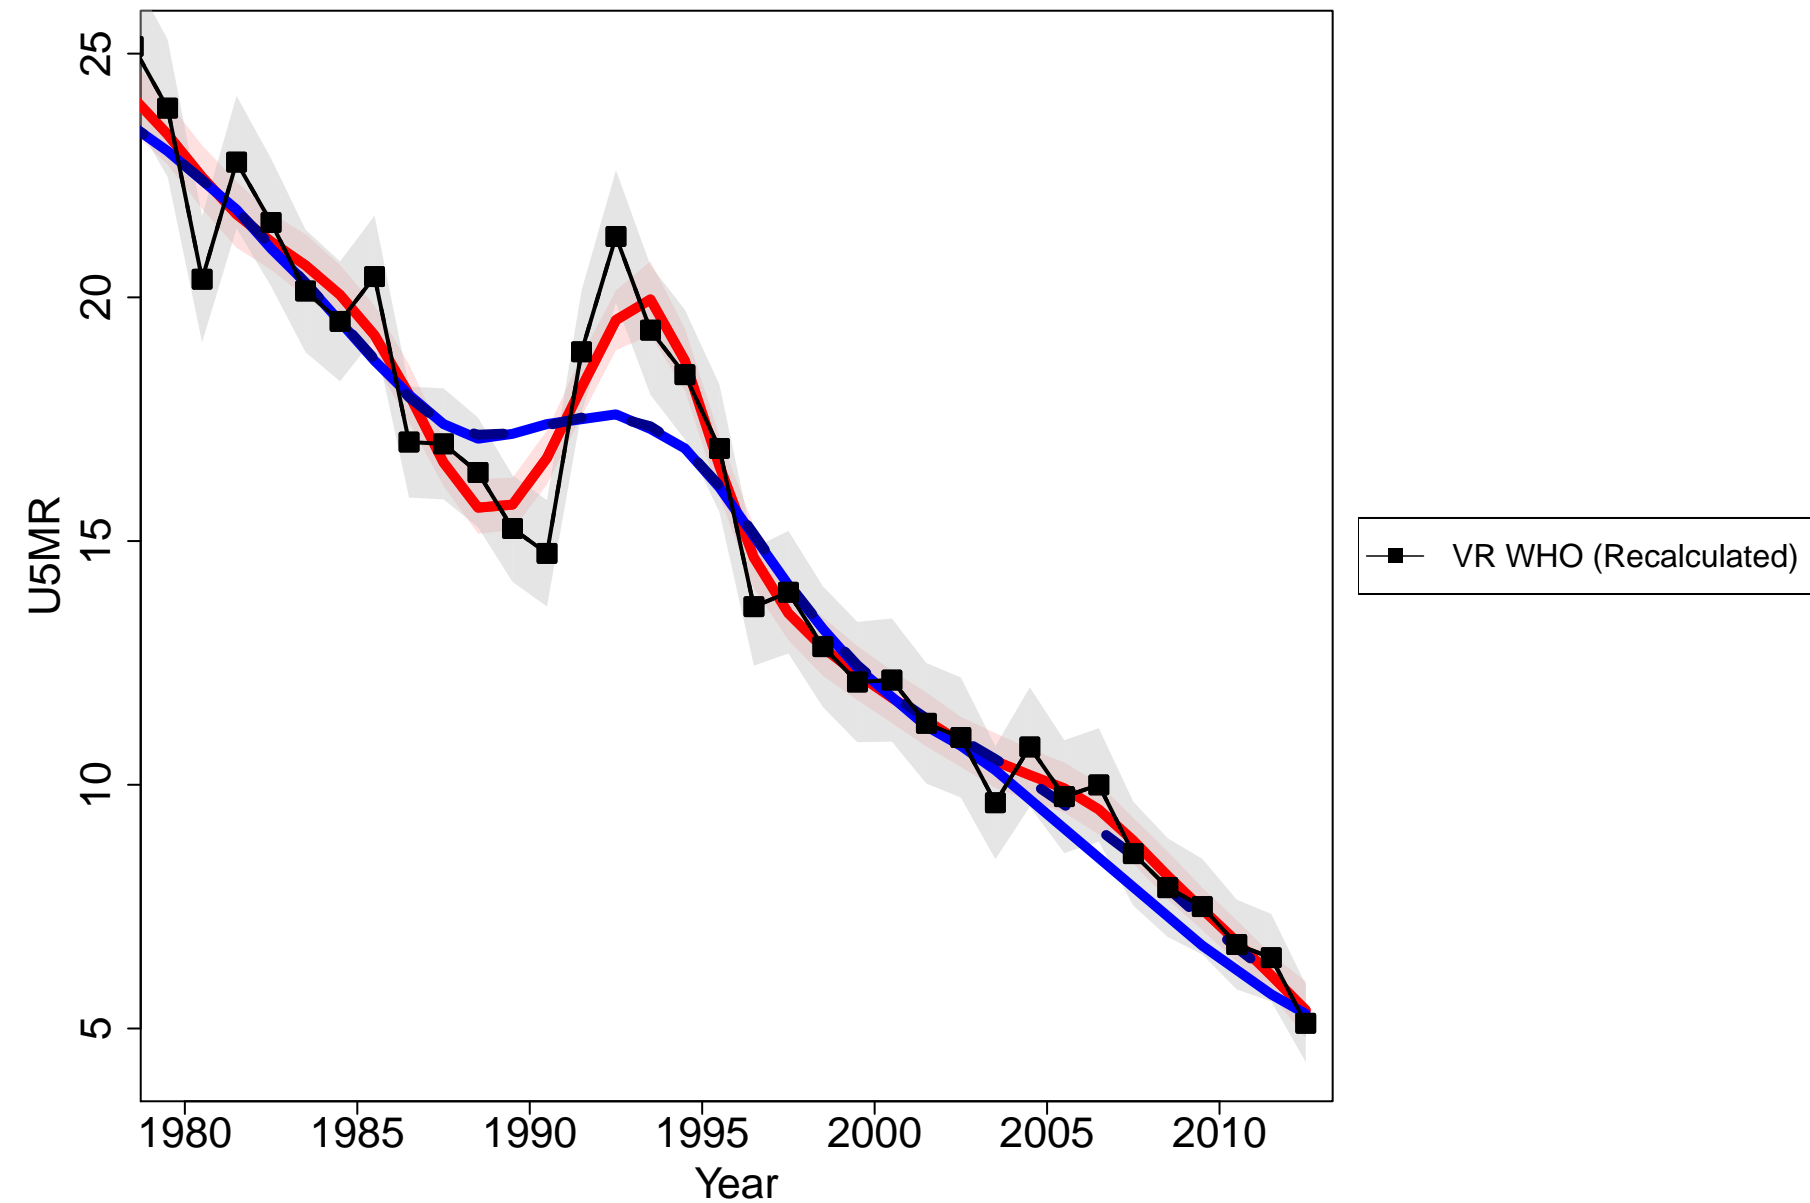

# Luxembourg

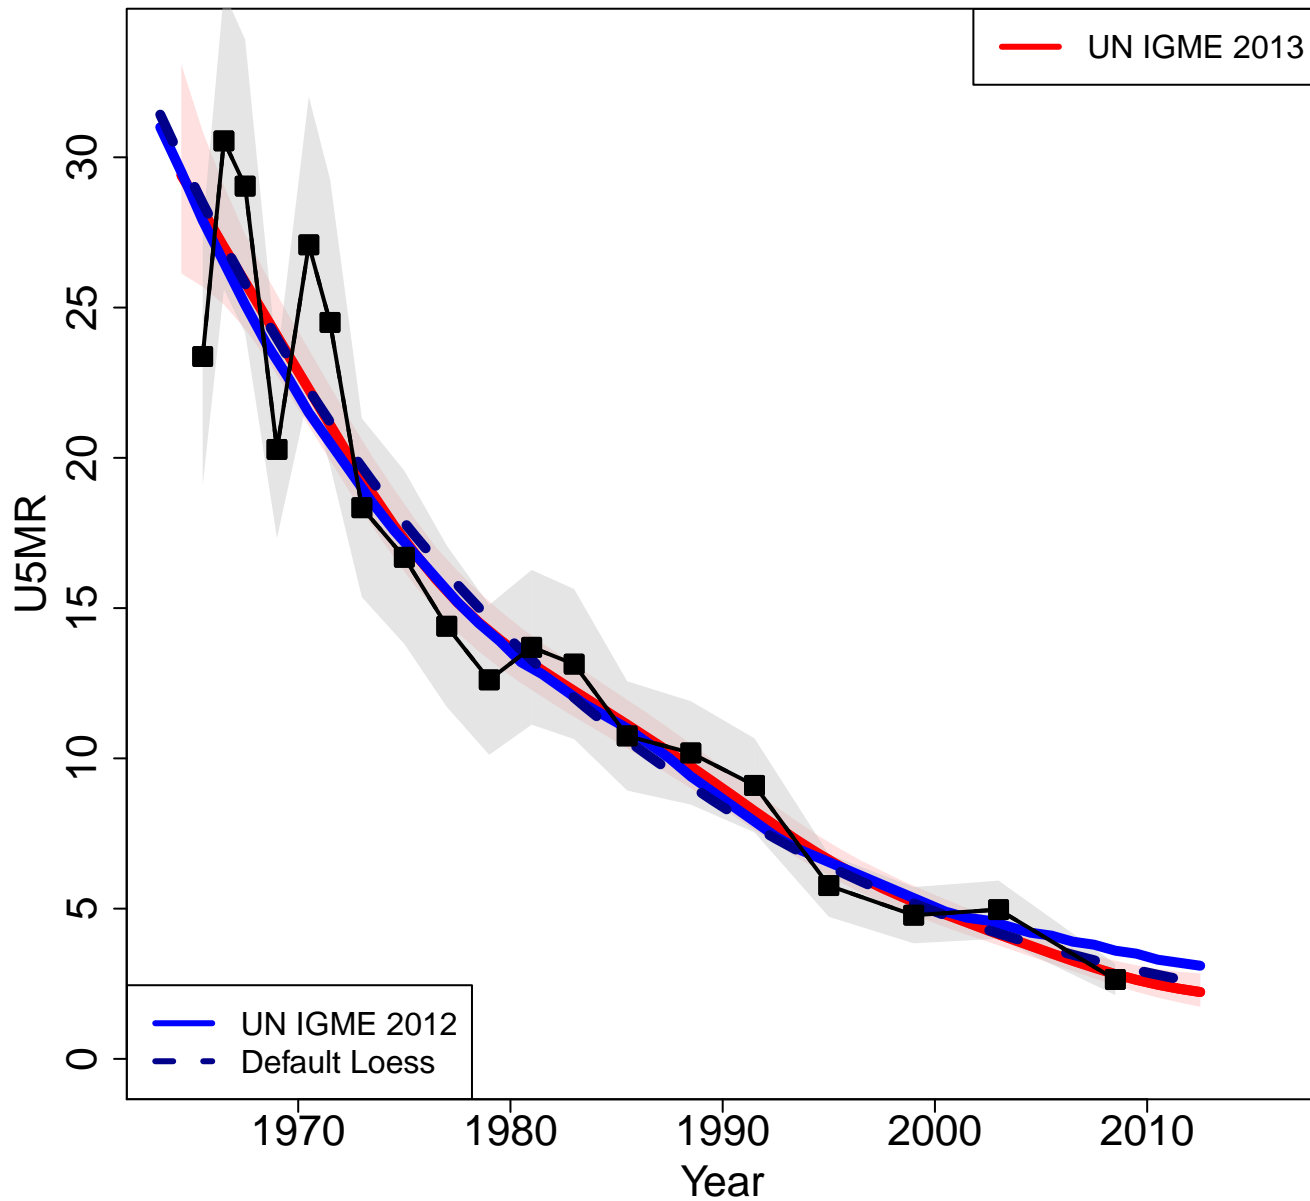

# Zoomed in

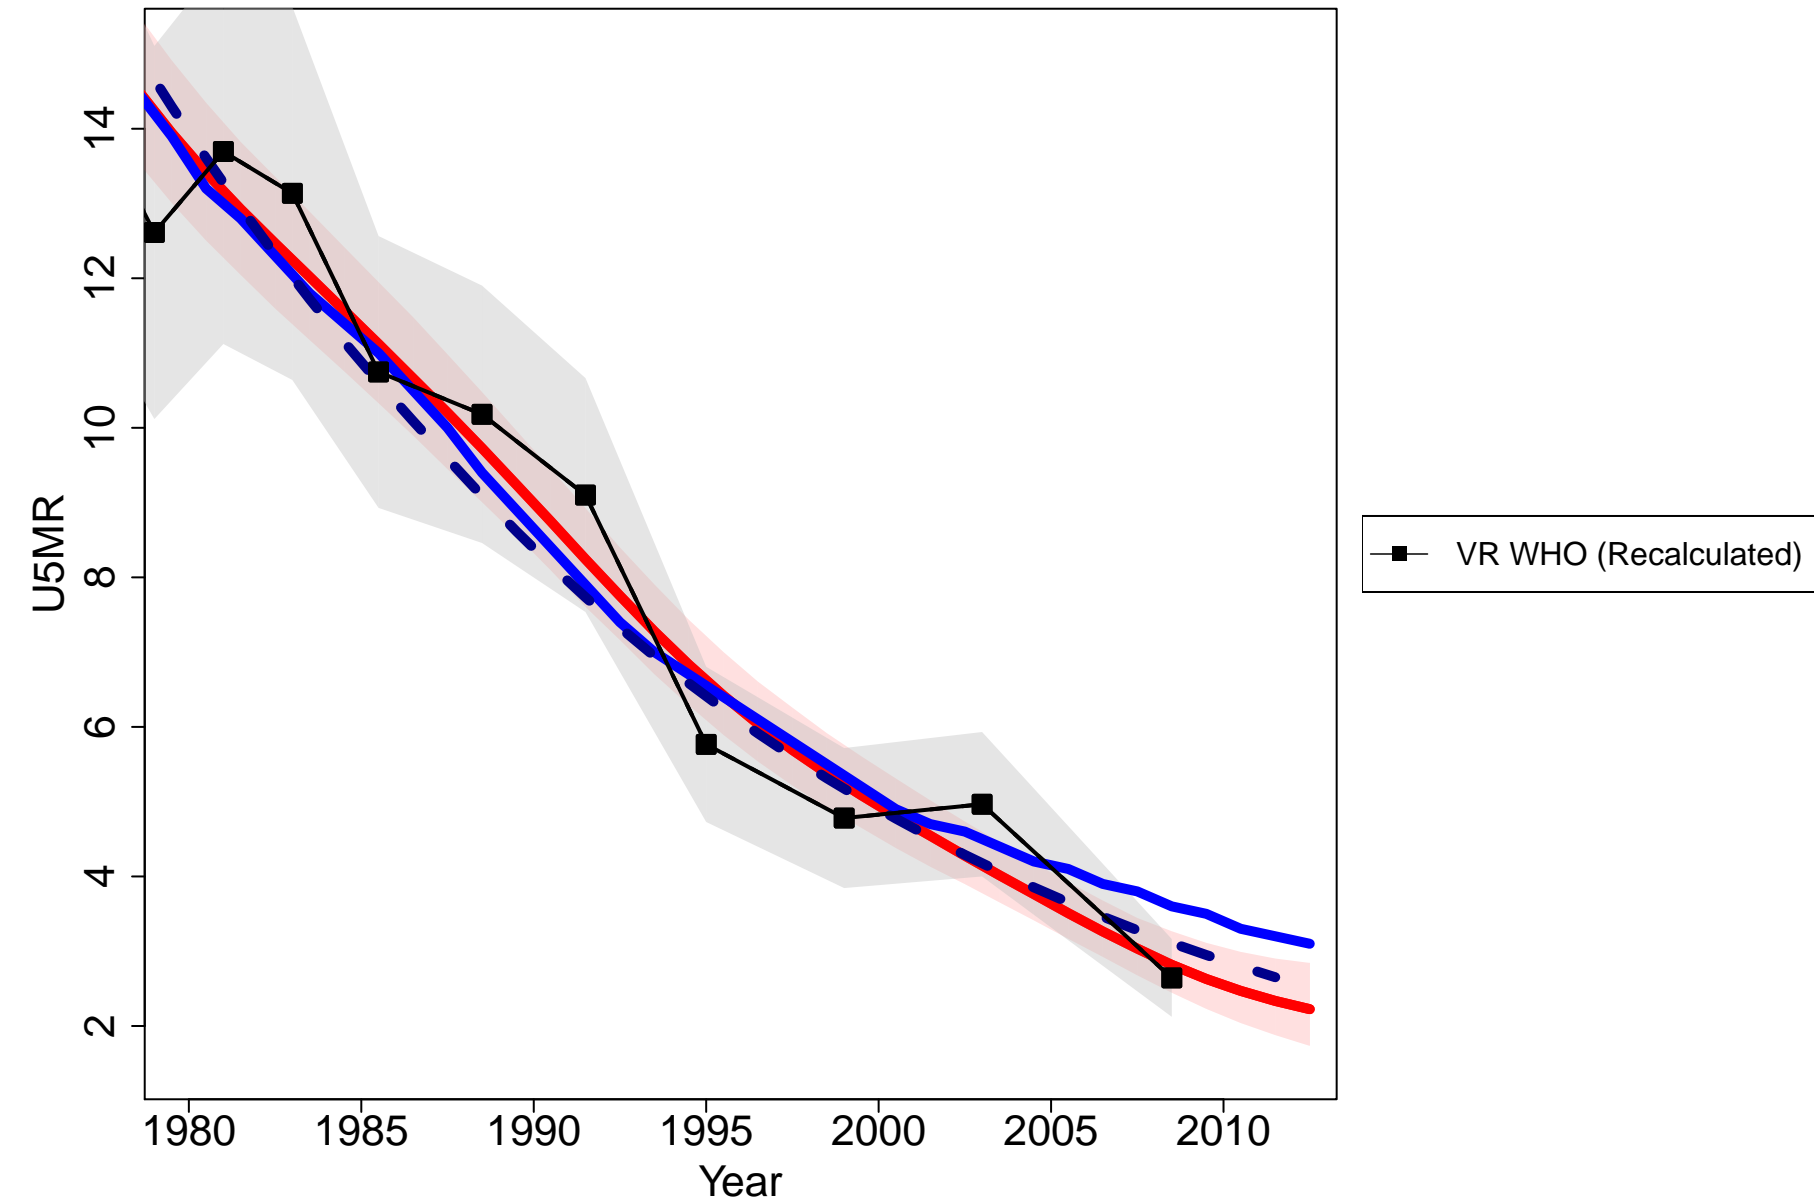

# Malta

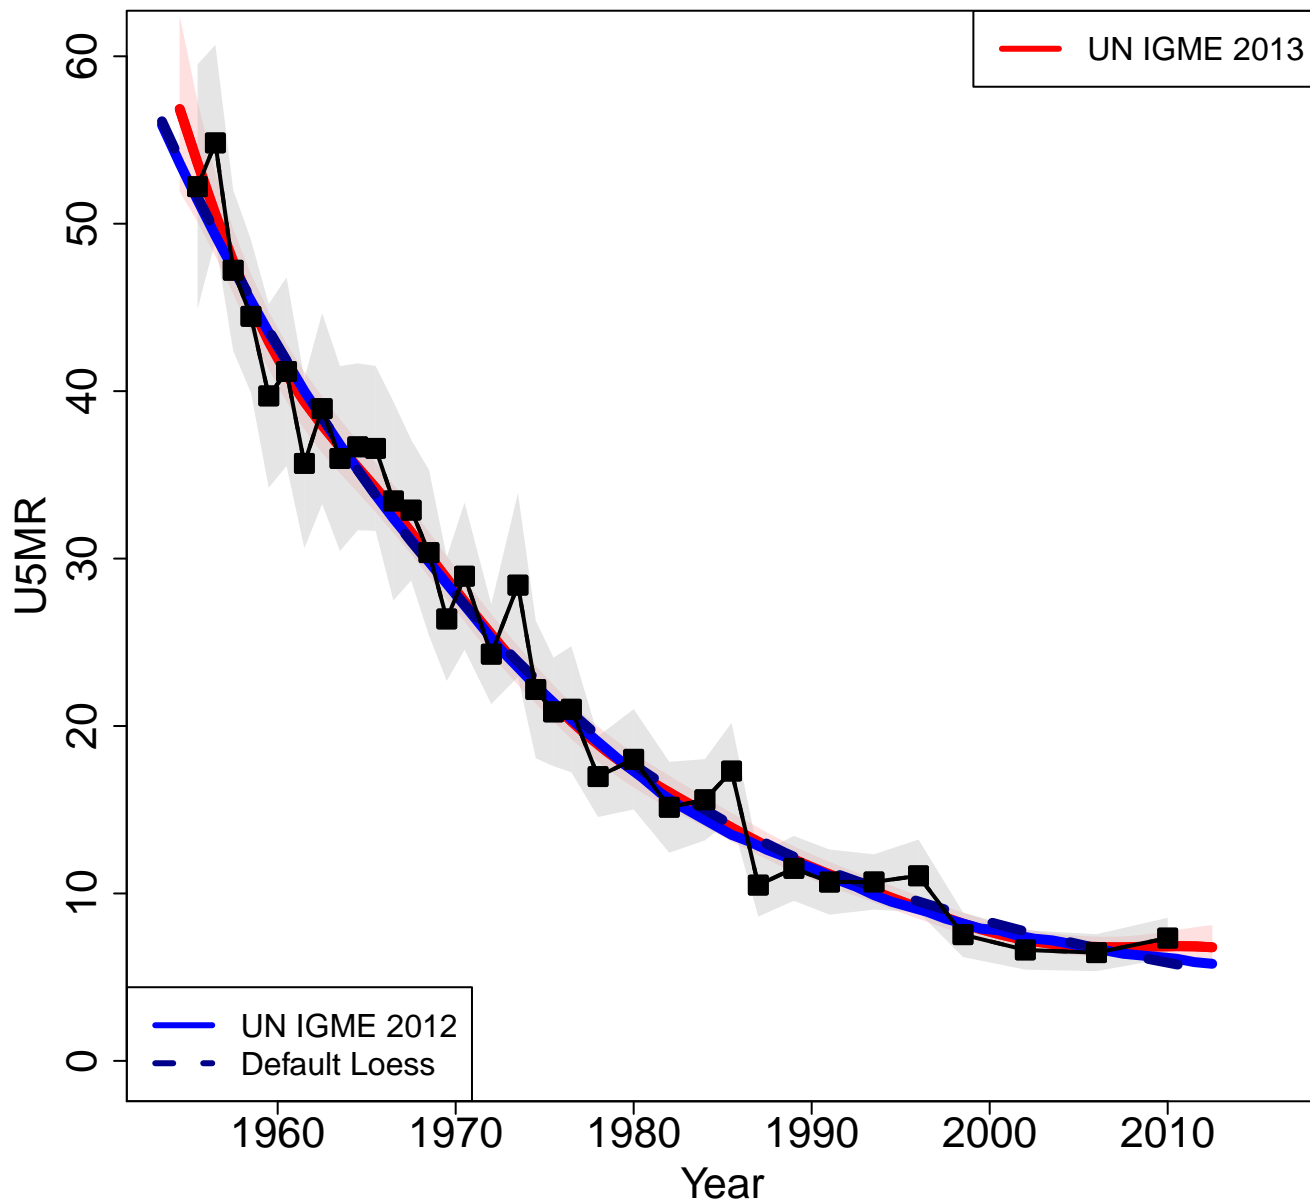

# Zoomed in

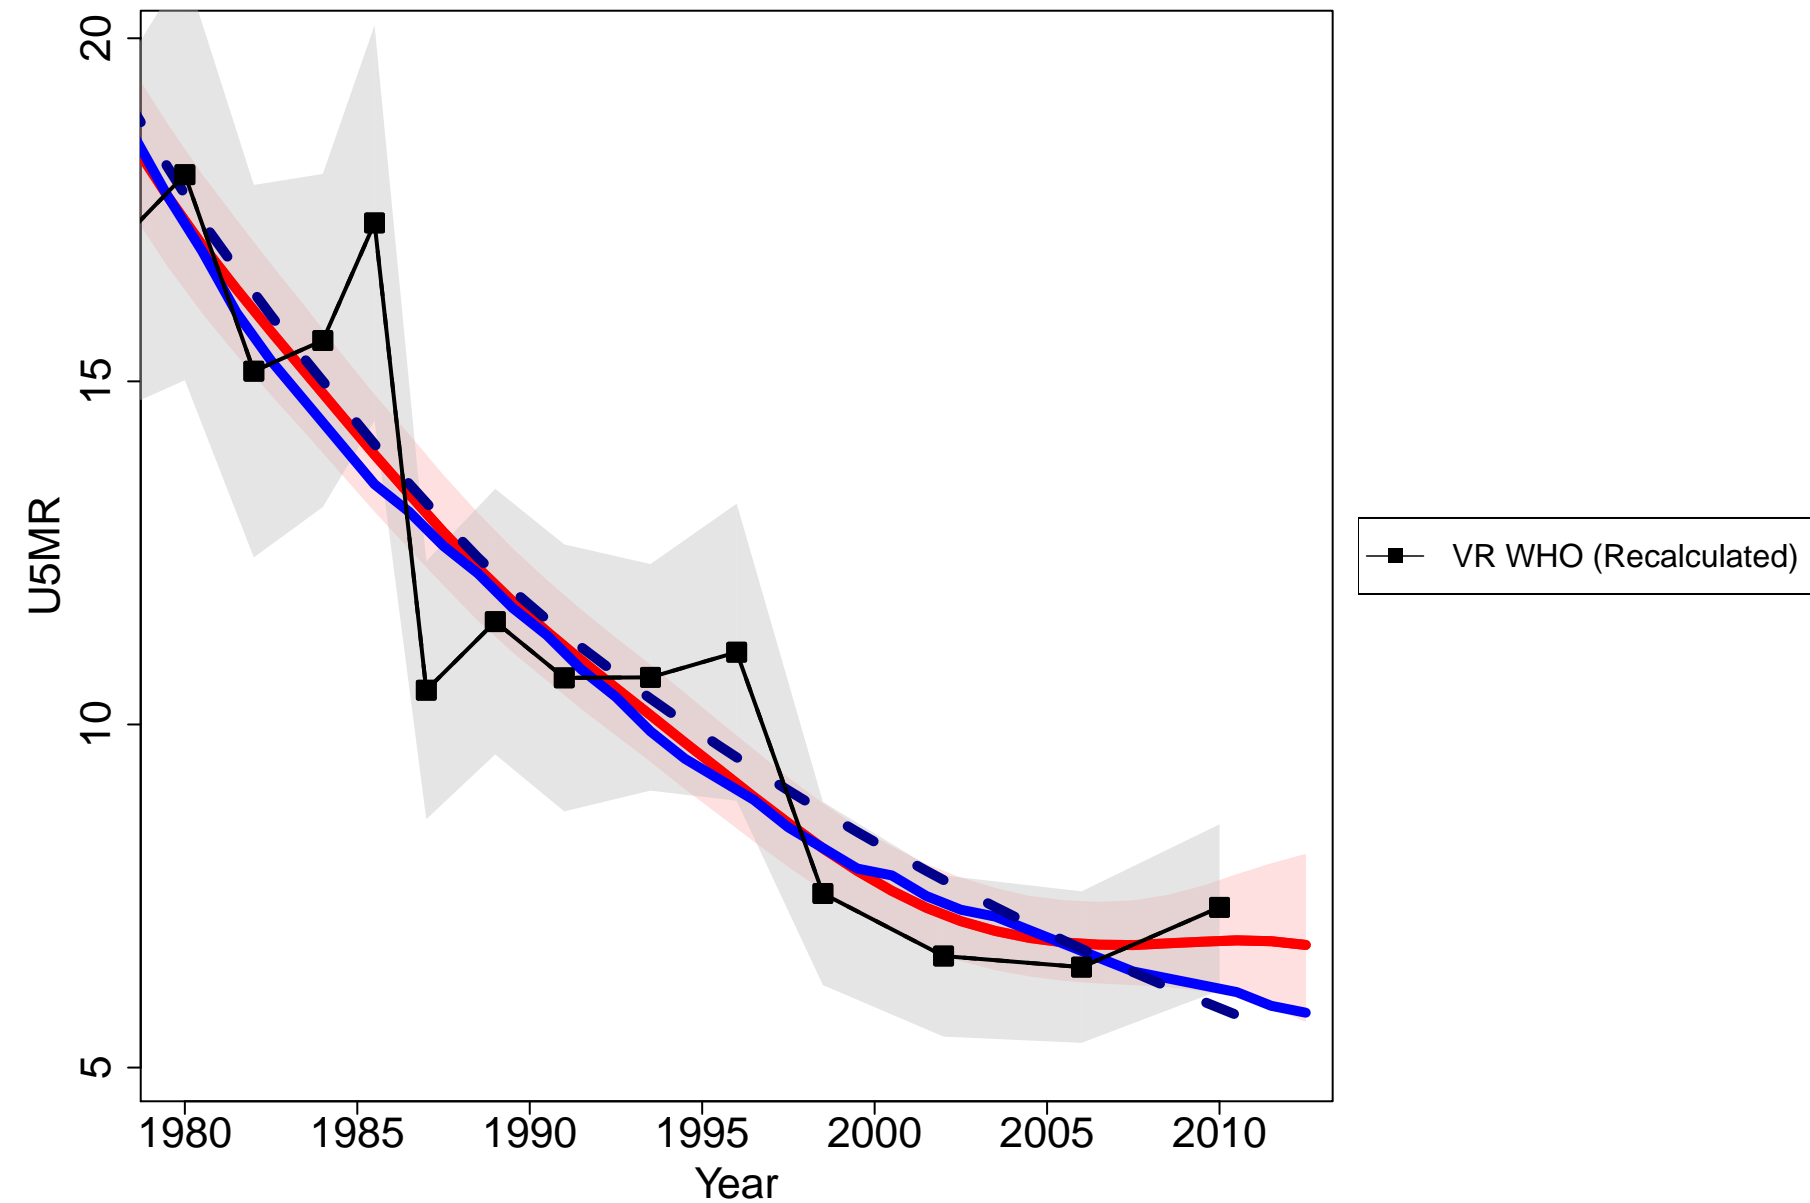

# Mauritius

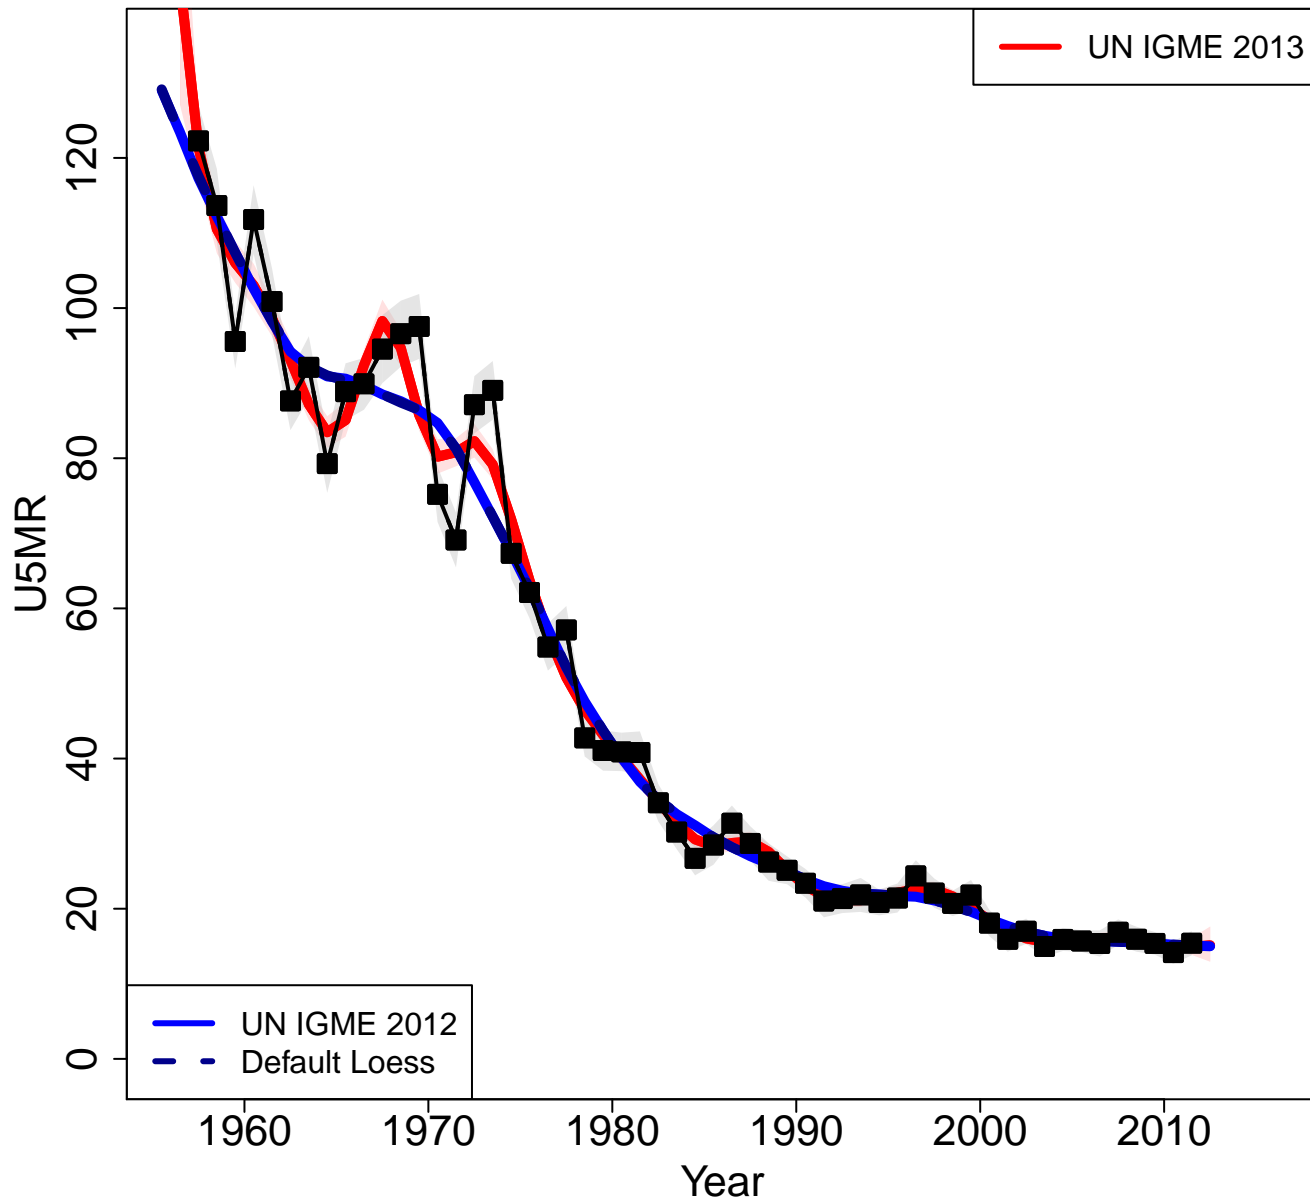

# Zoomed in

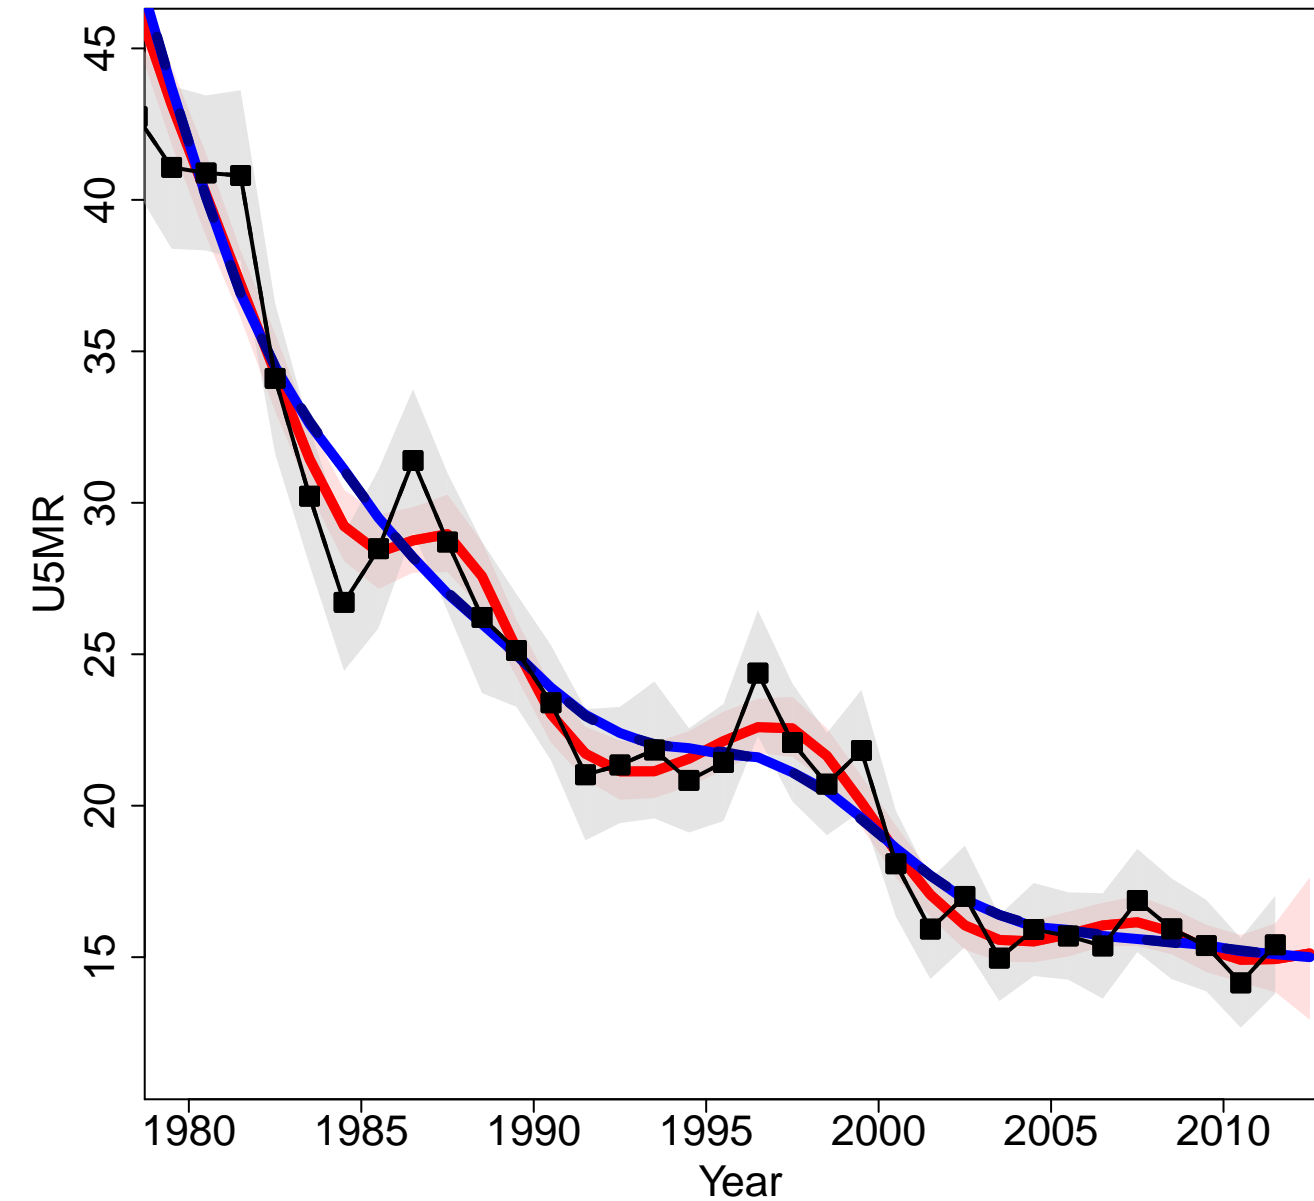



# Montenegro

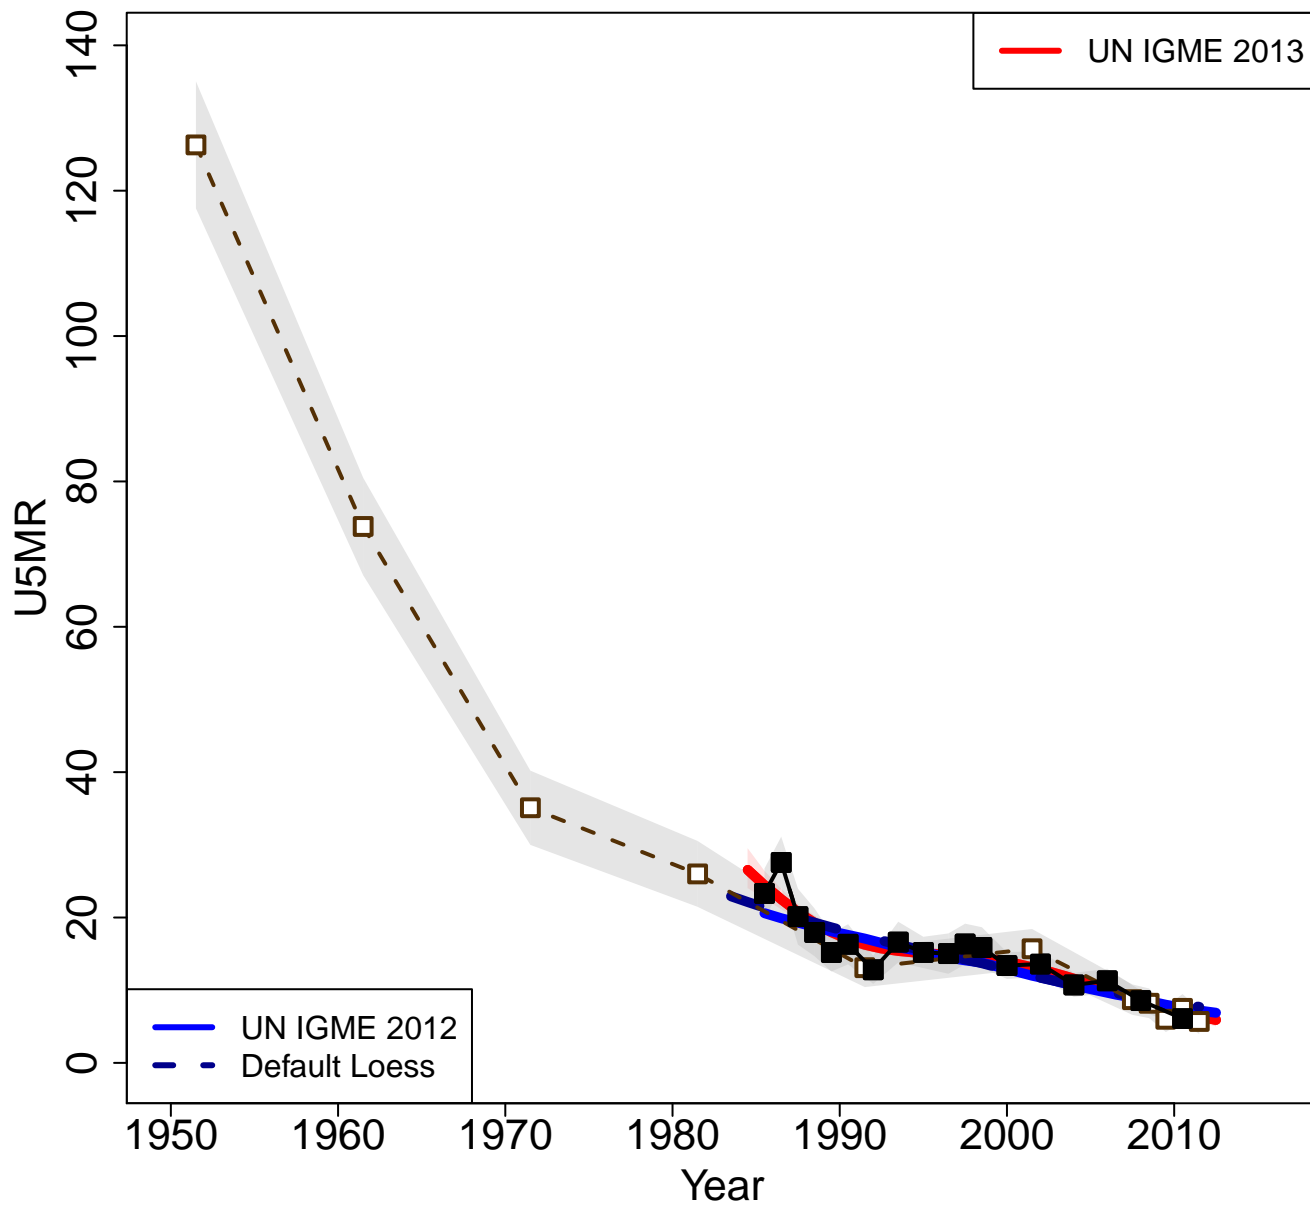

# Zoomed in

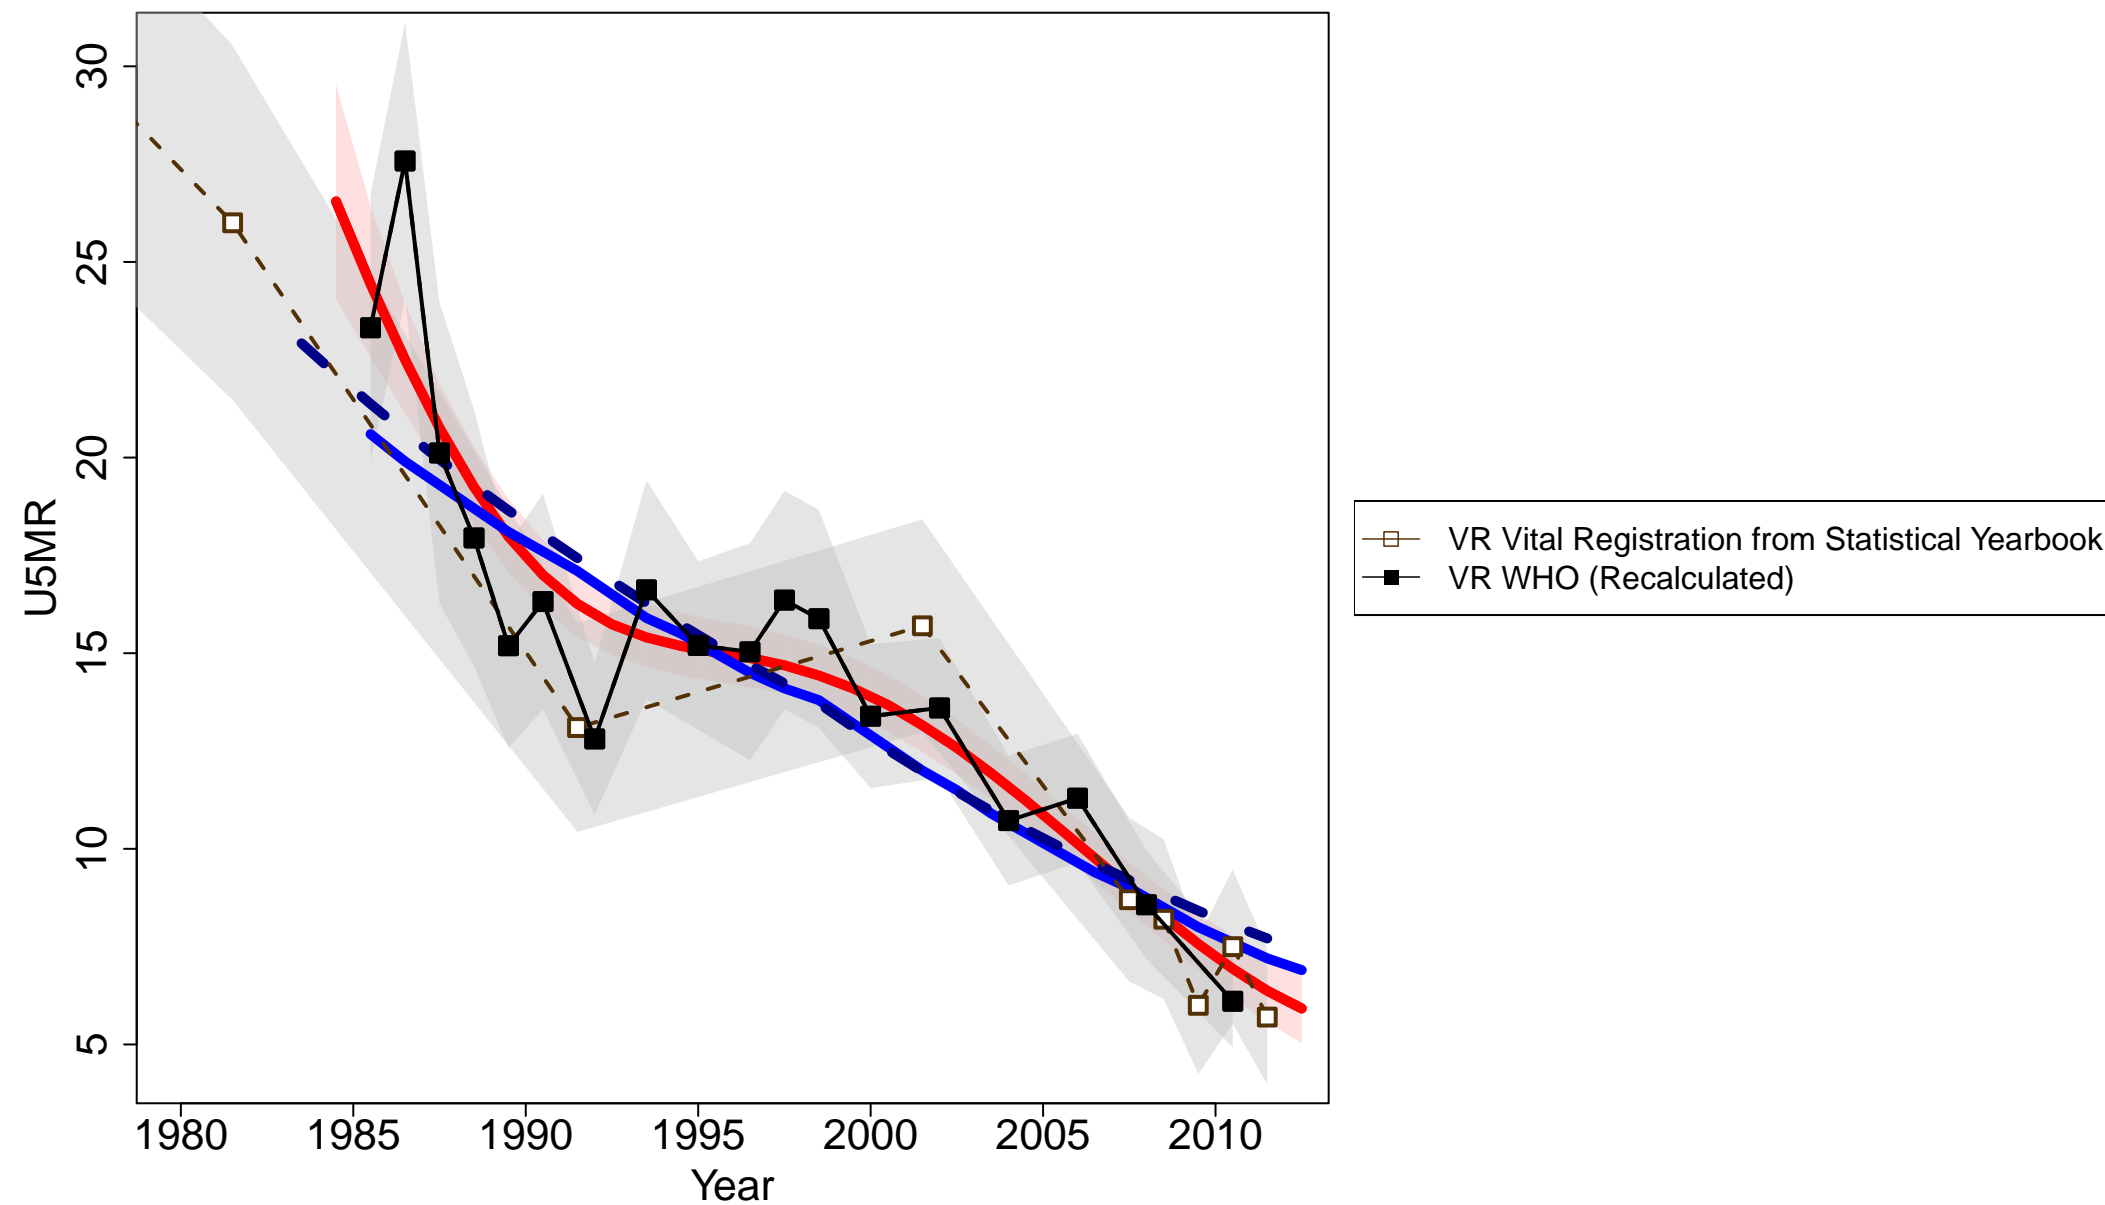

# Netherlands

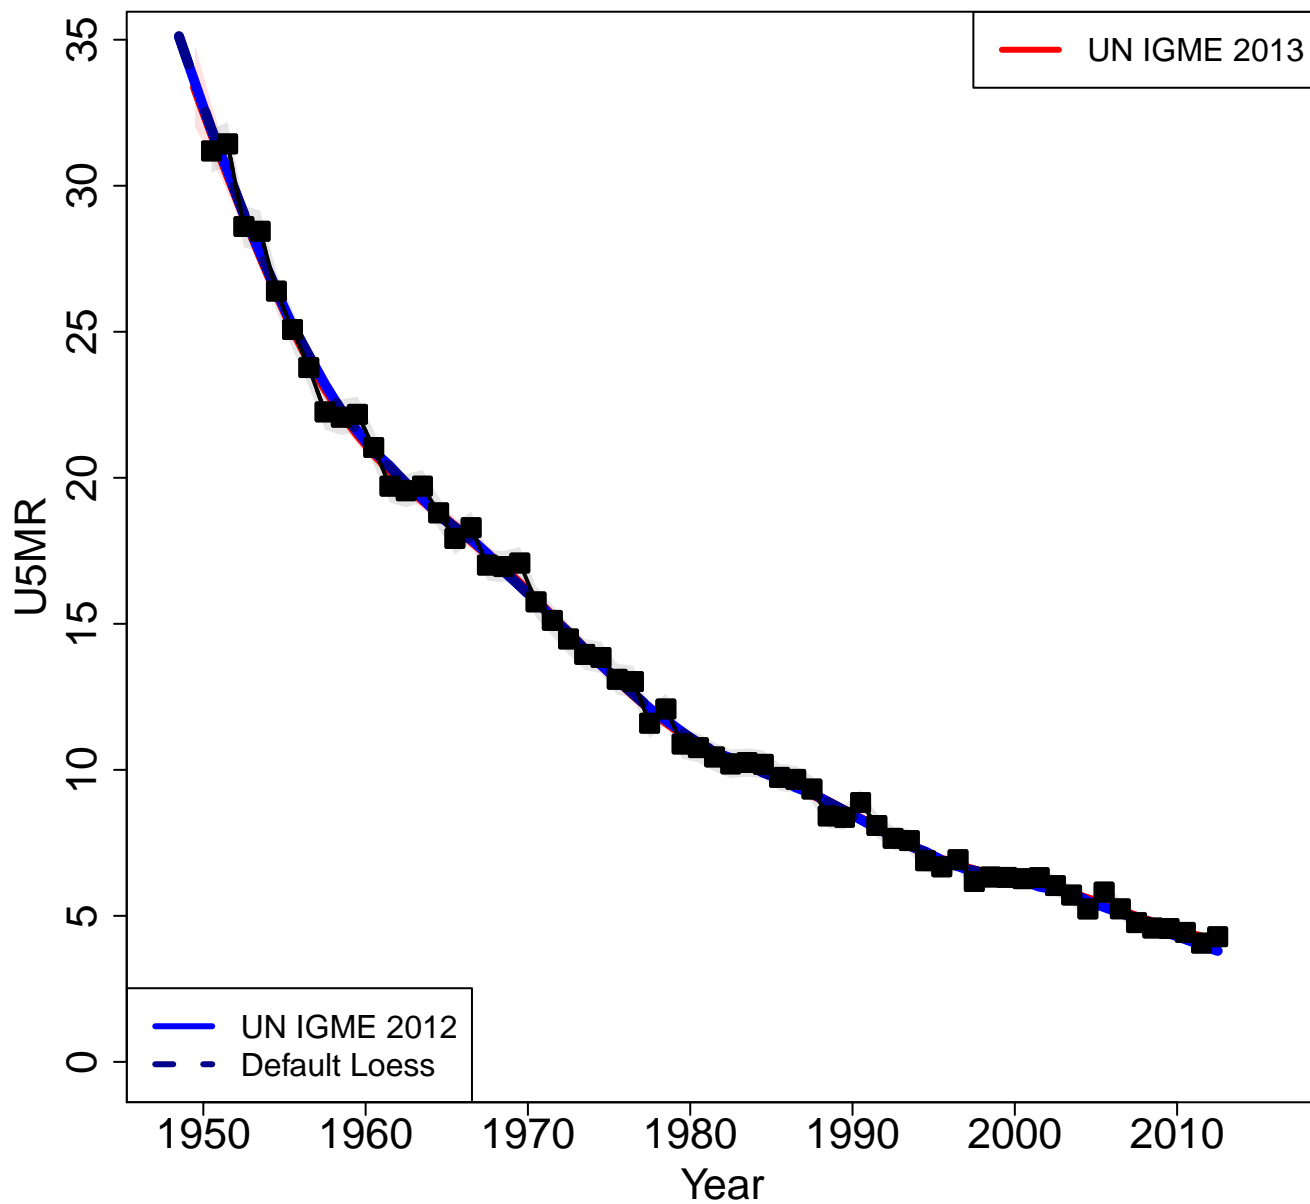

# Zoomed in

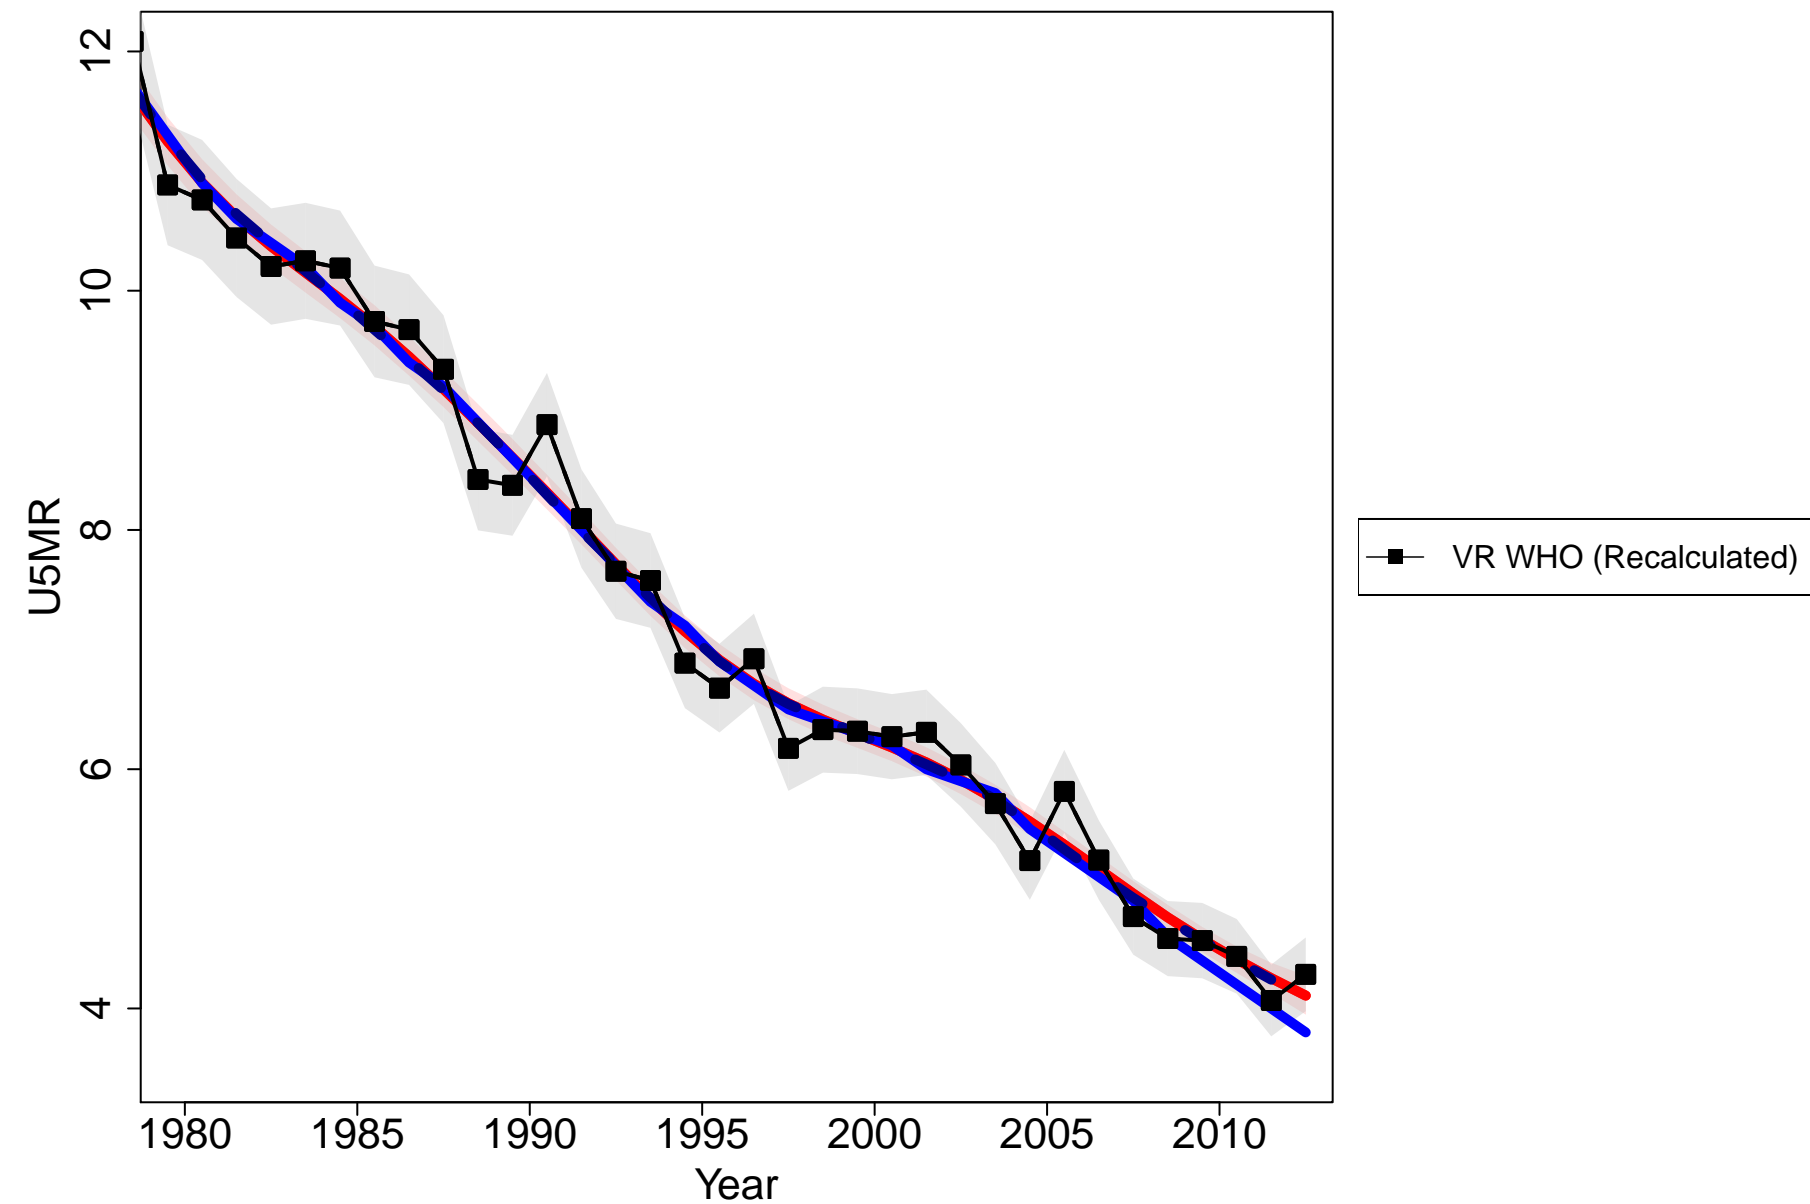

# New Zealand

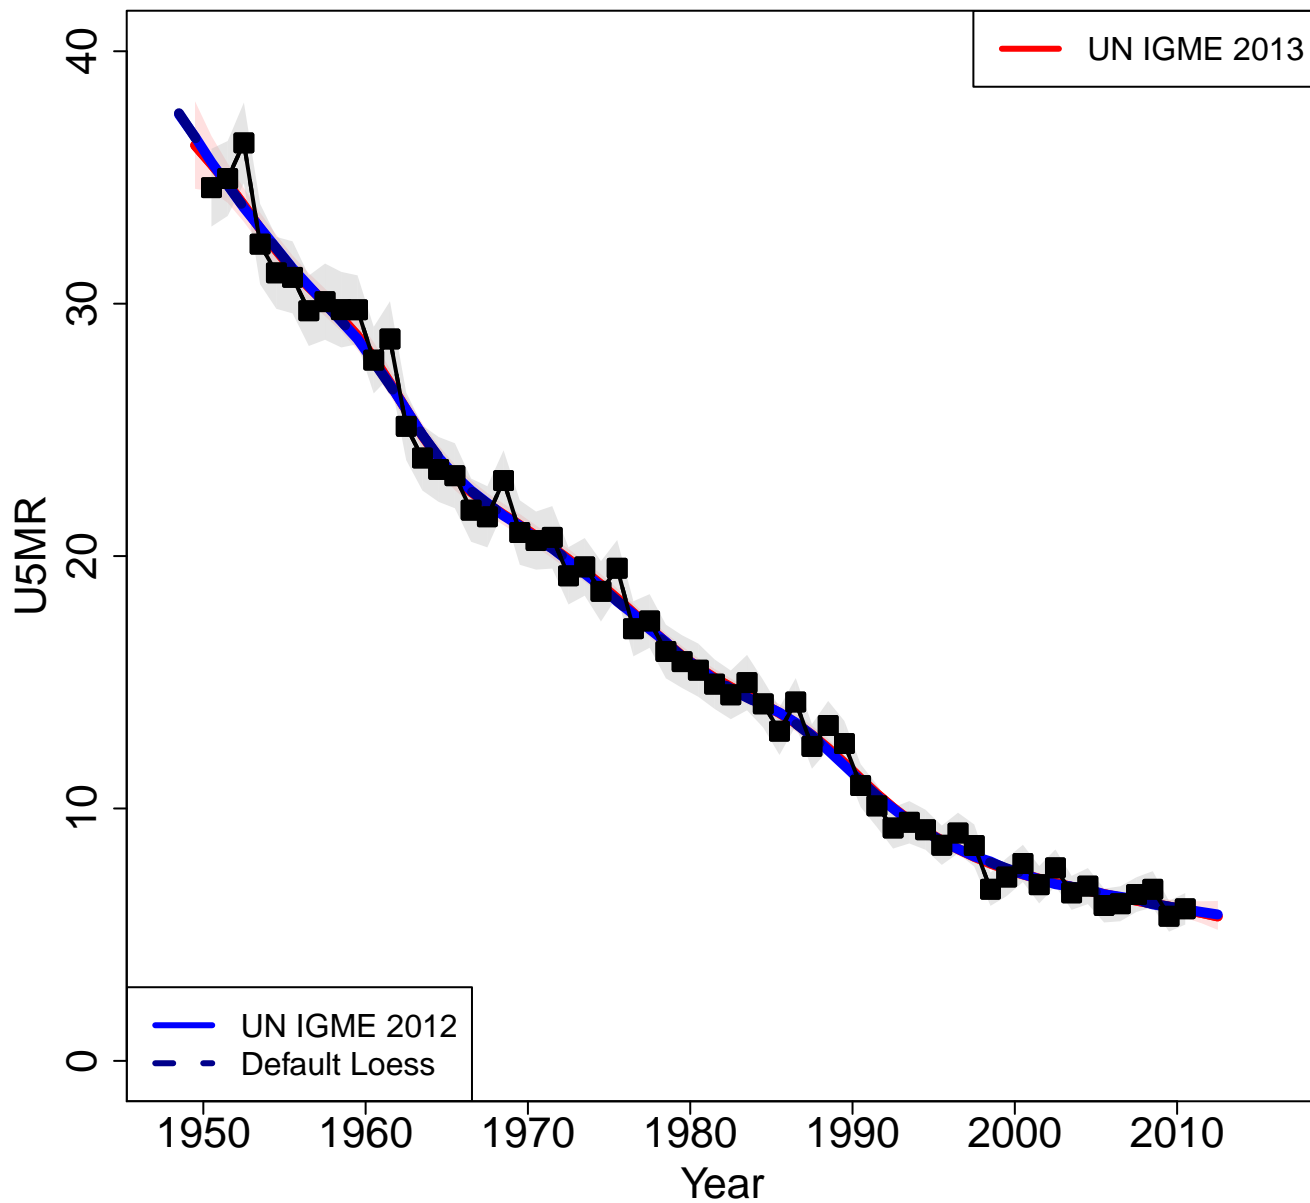

# Zoomed in

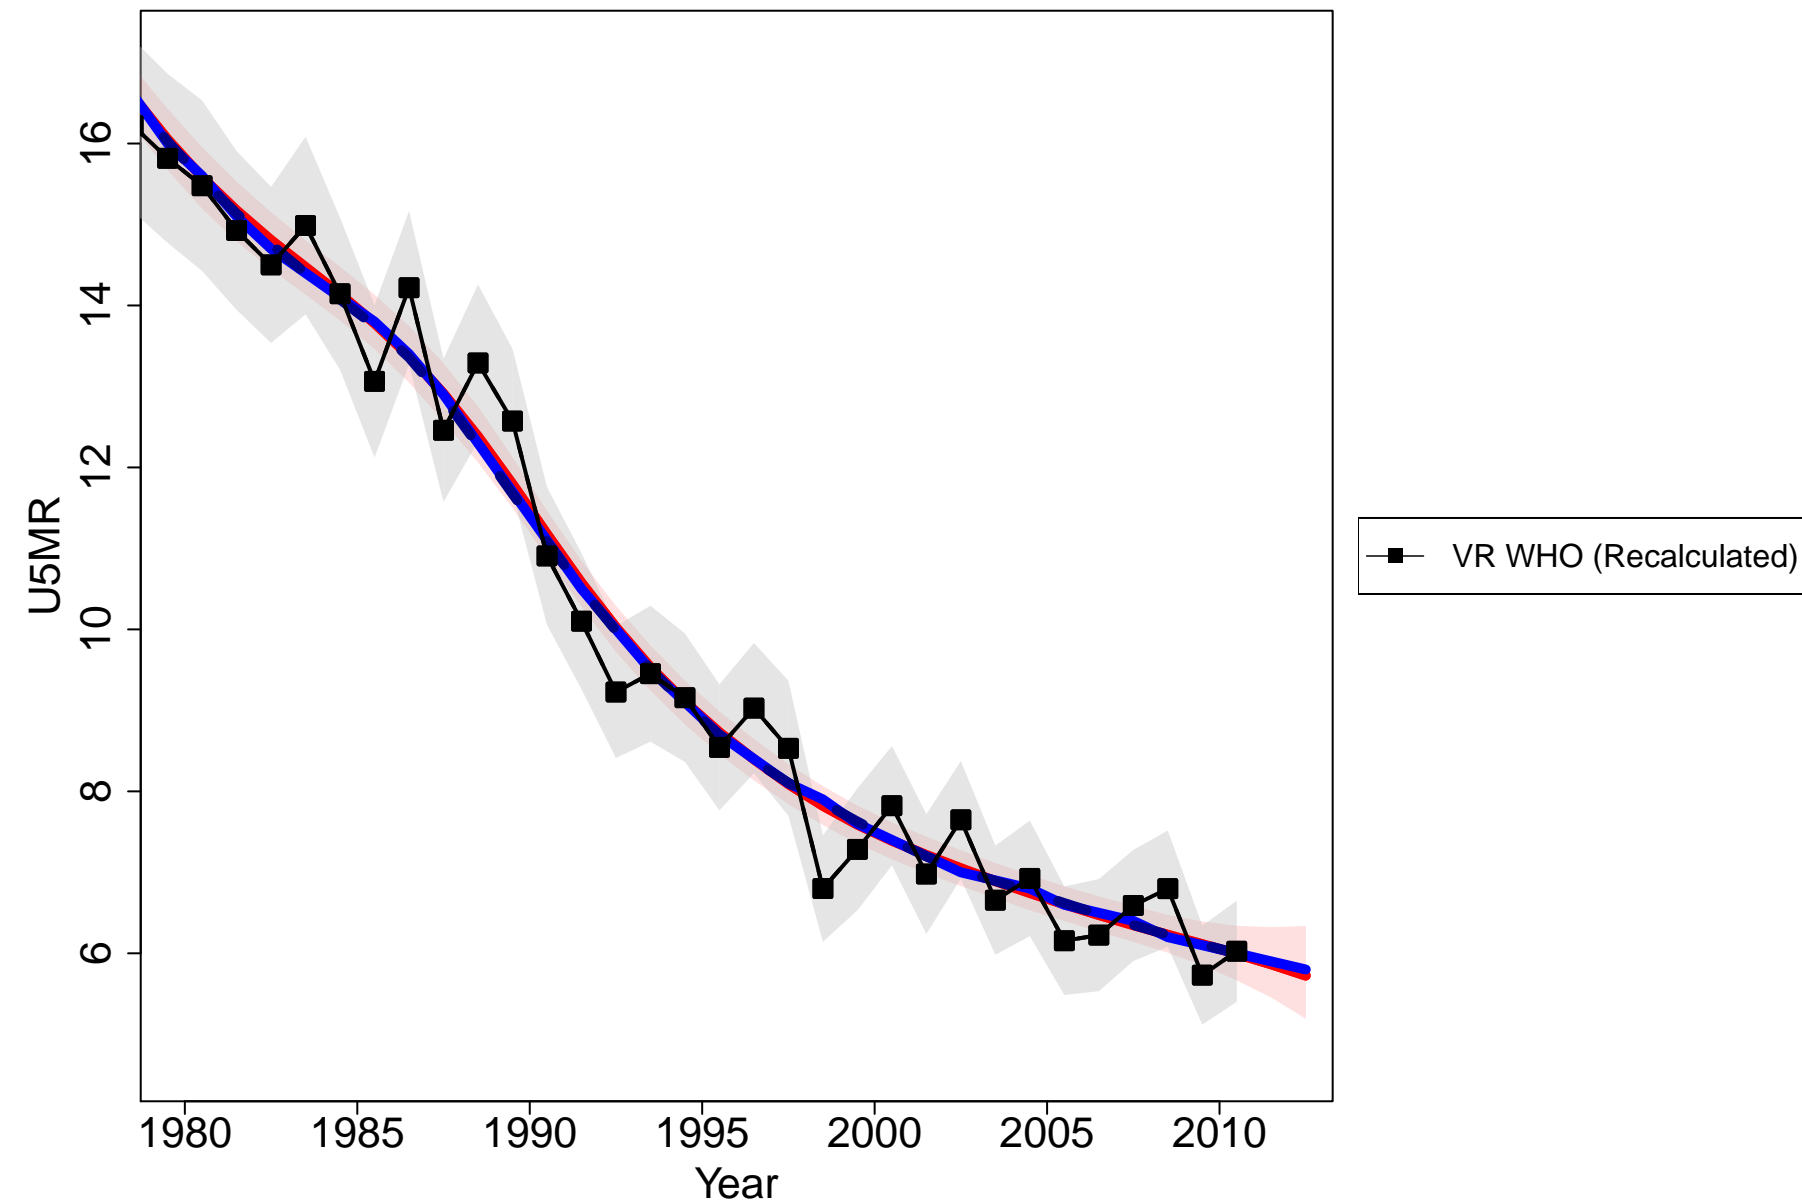

# Norway

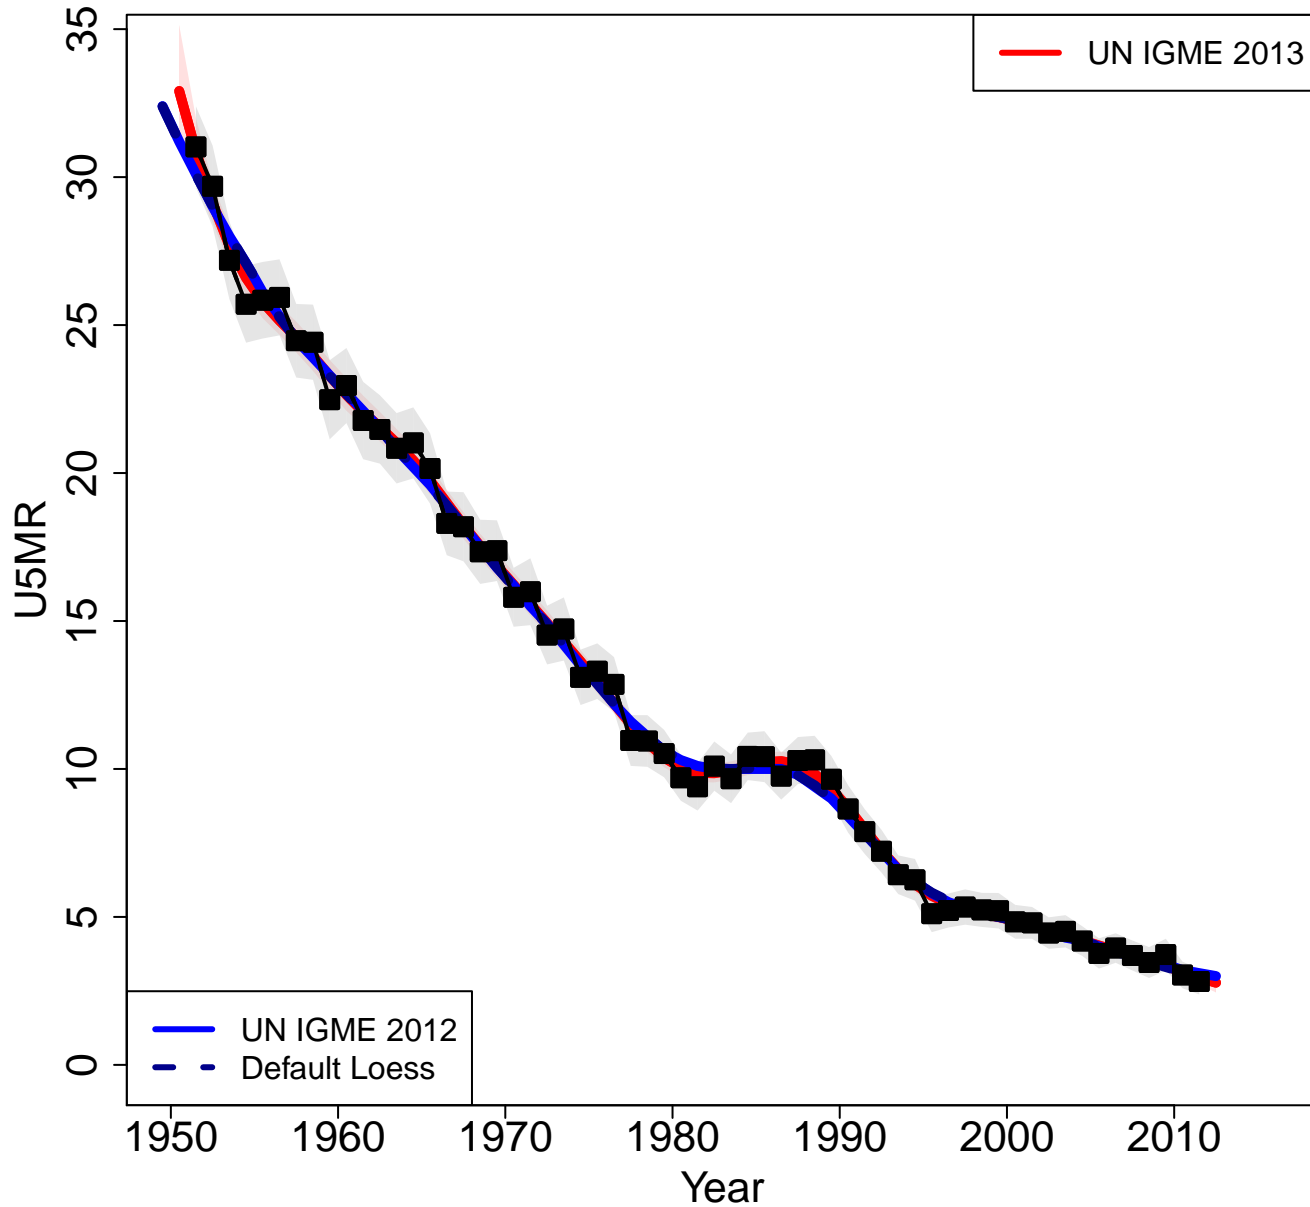

# Zoomed in

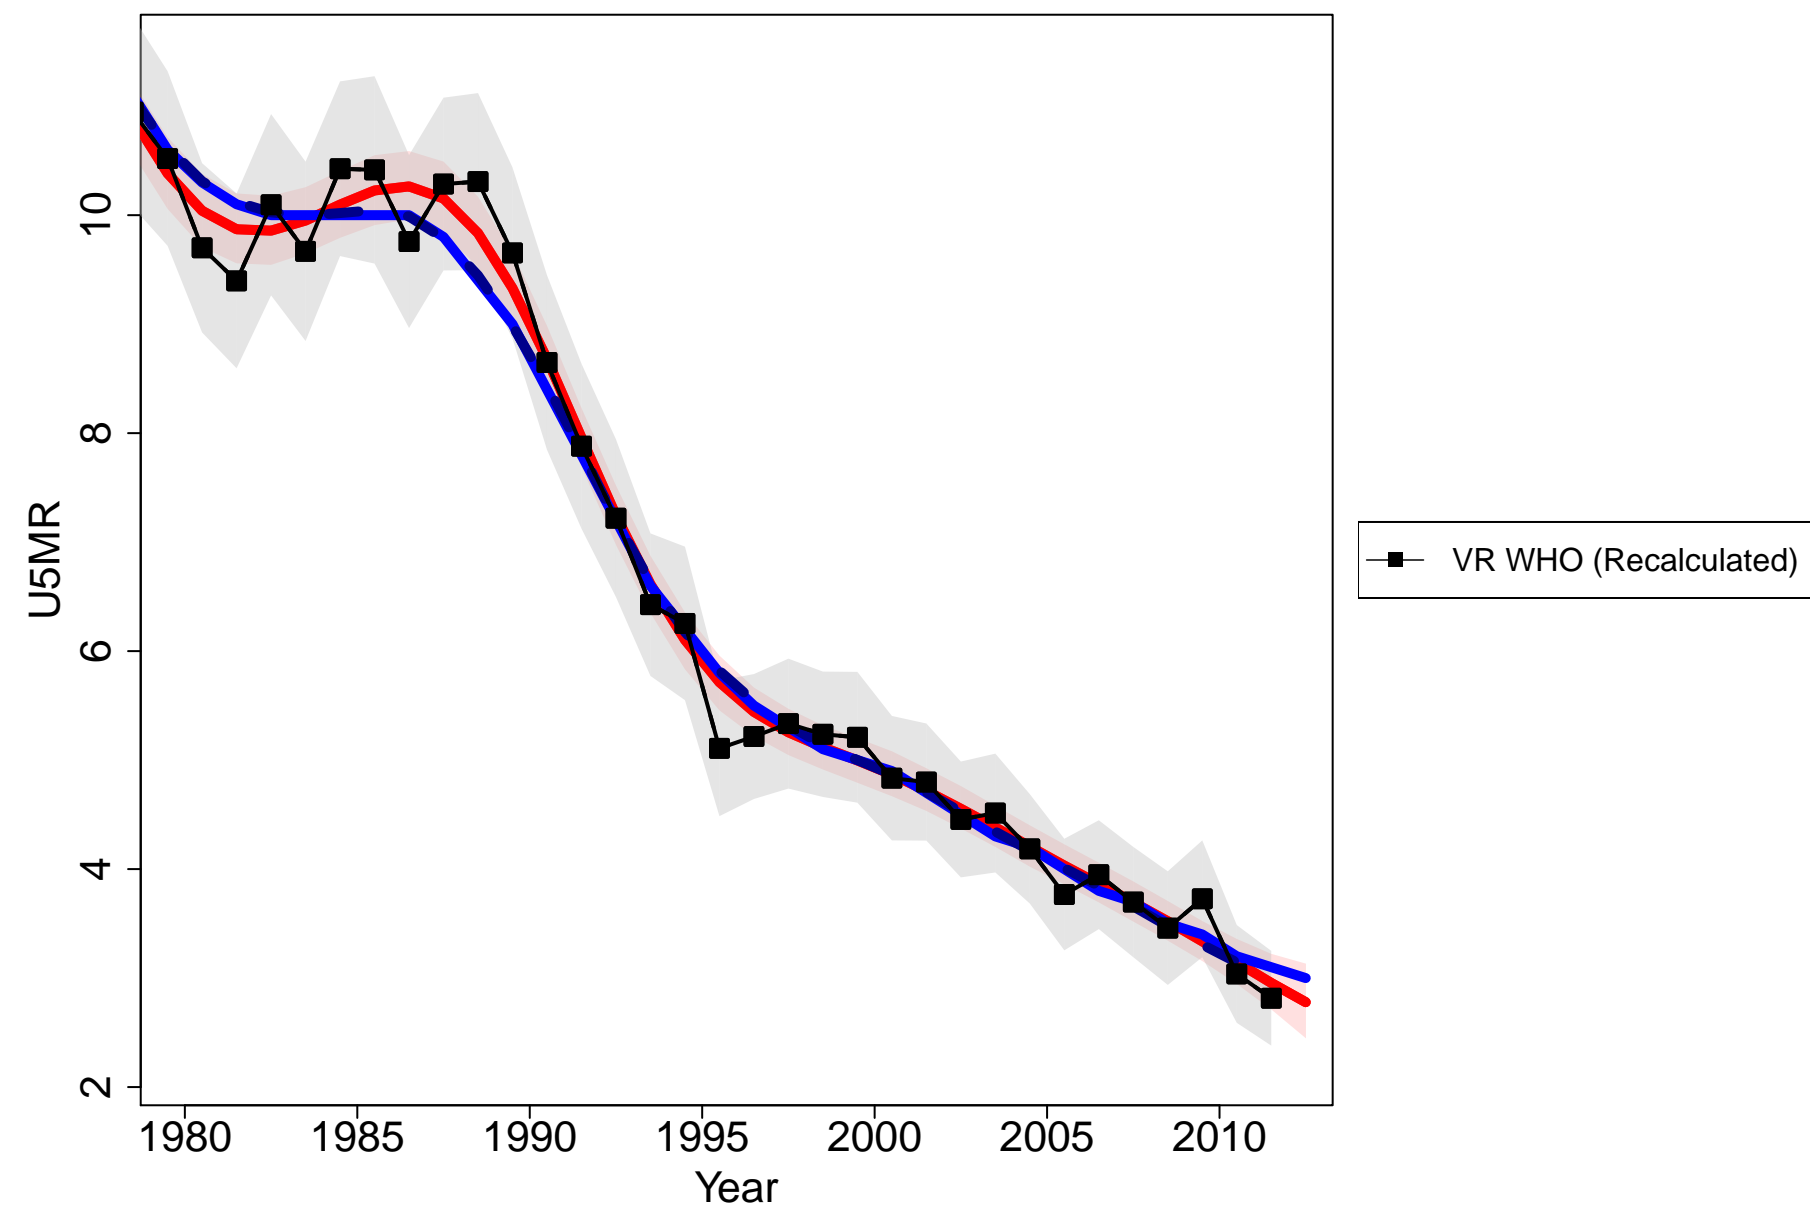

# Poland

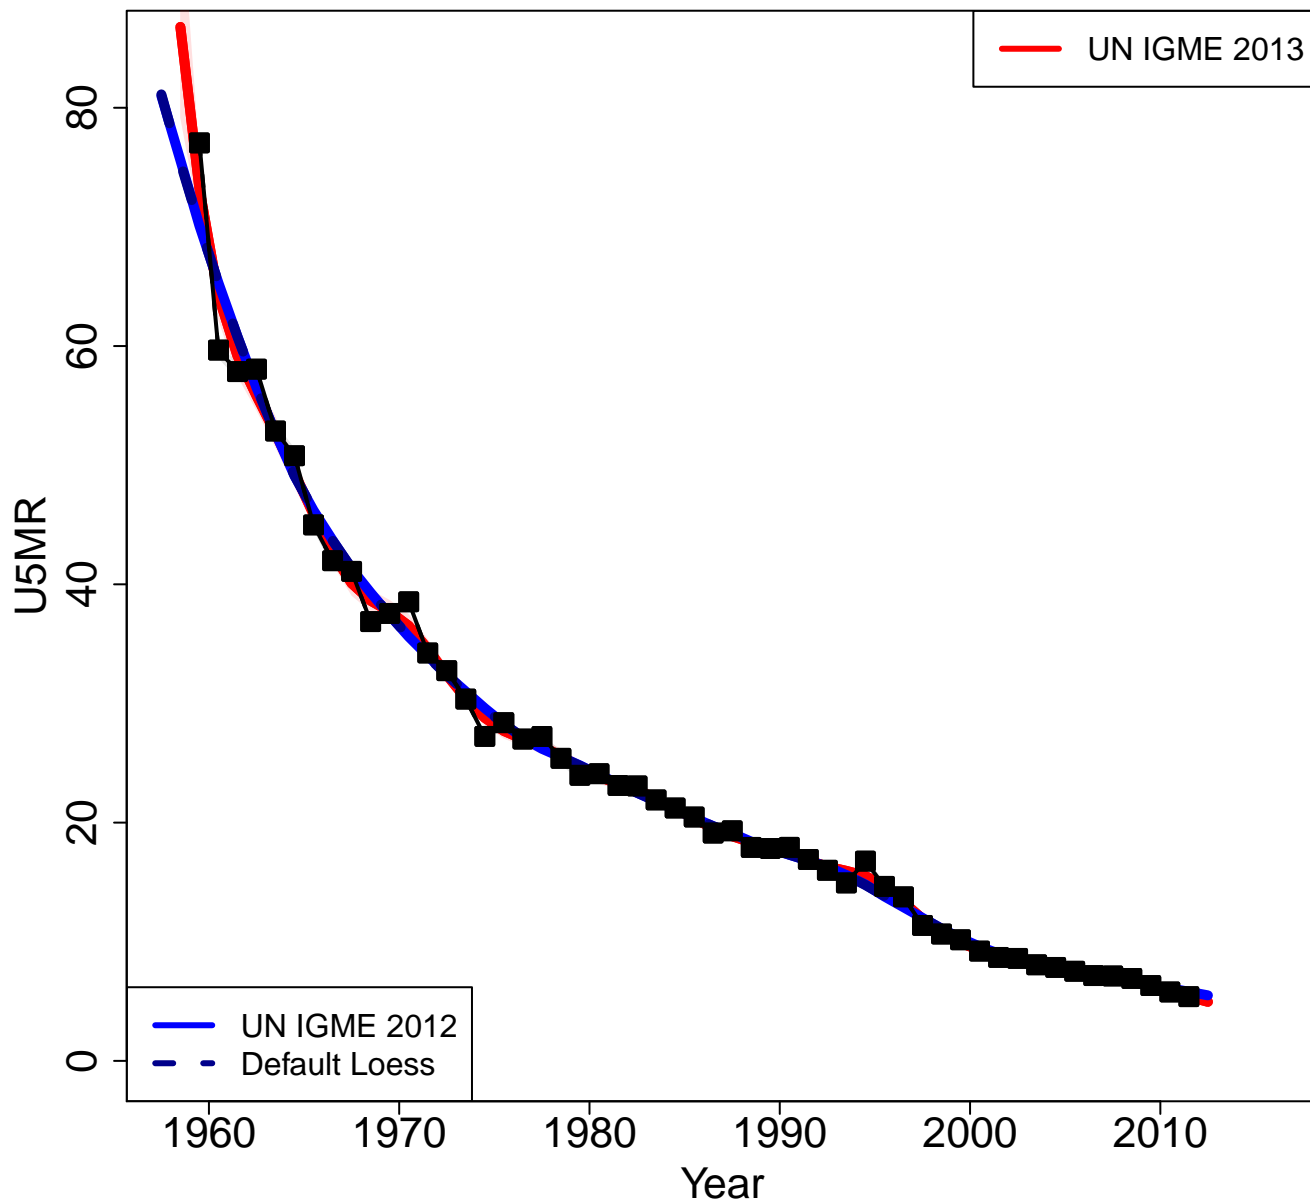

# Zoomed in

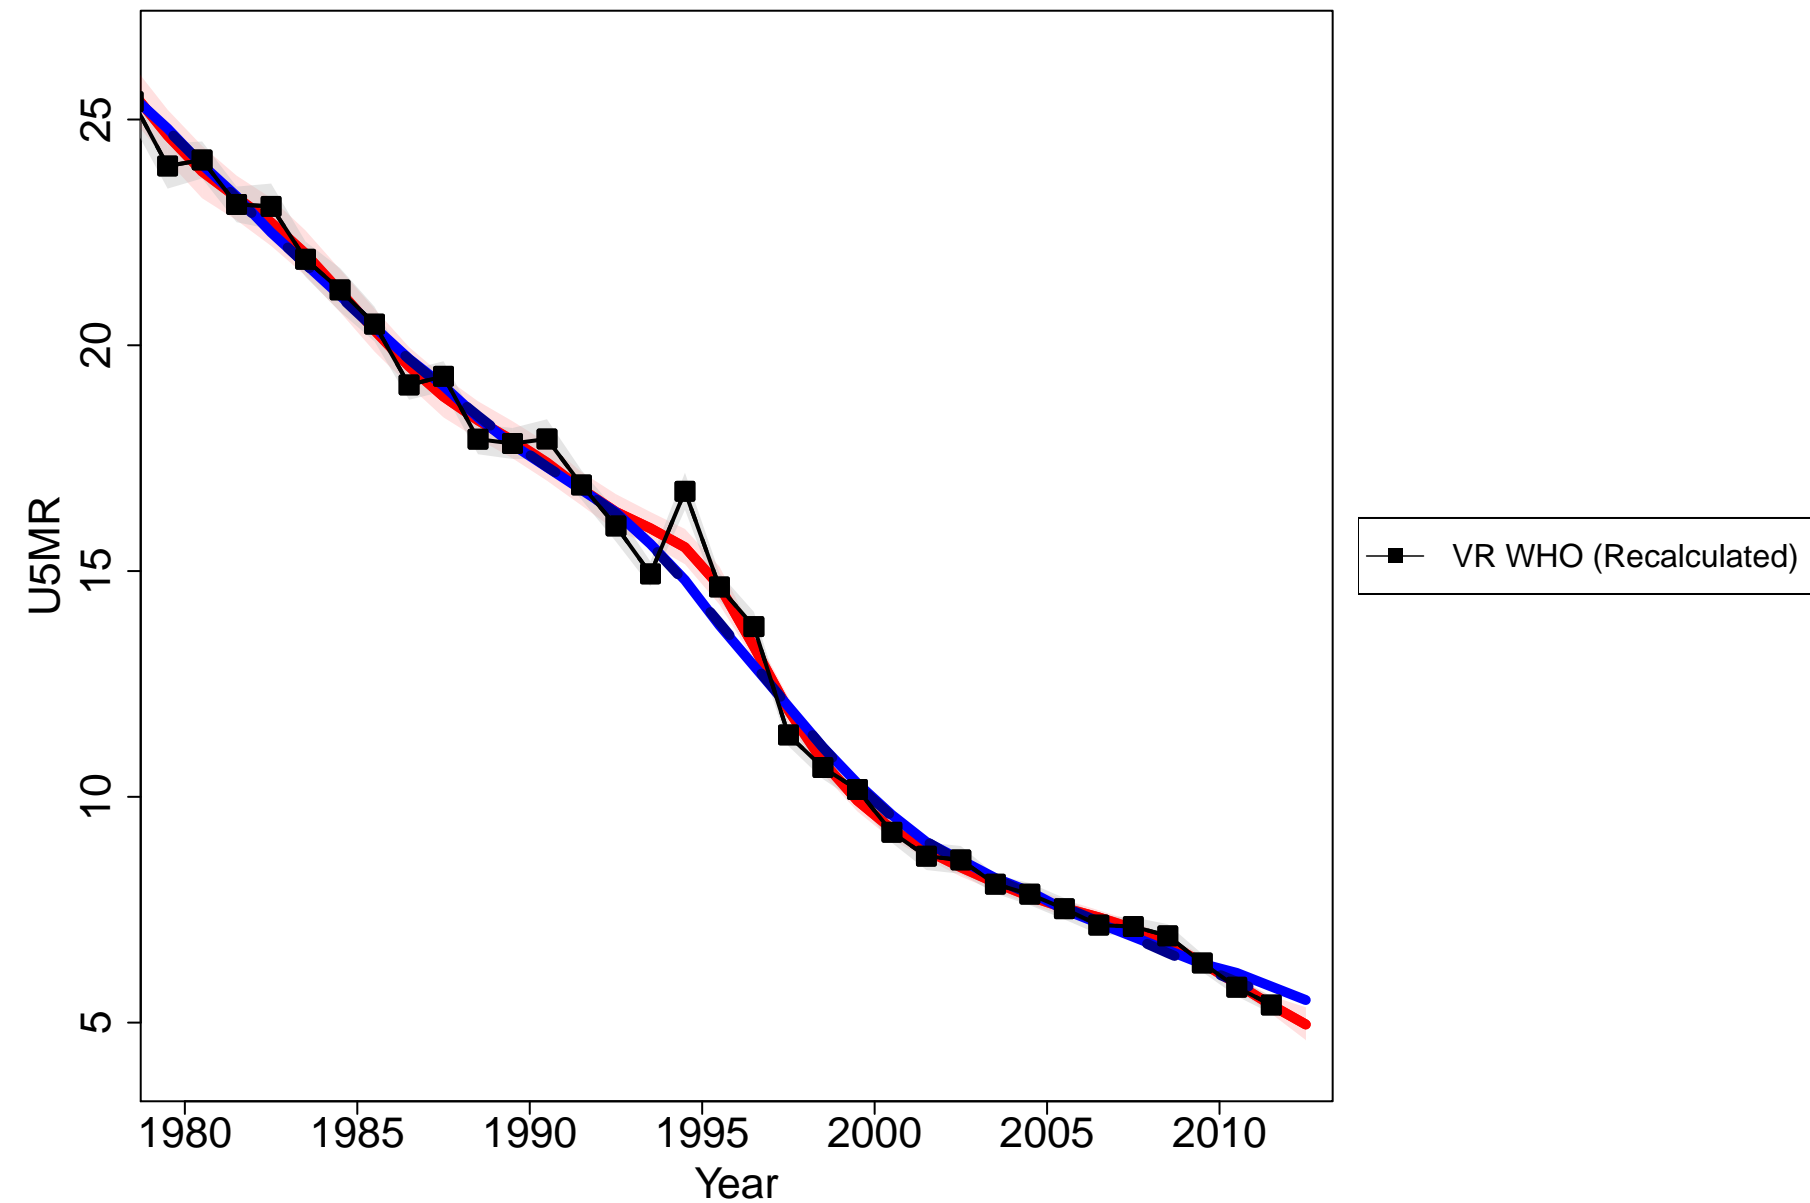

# Portugal

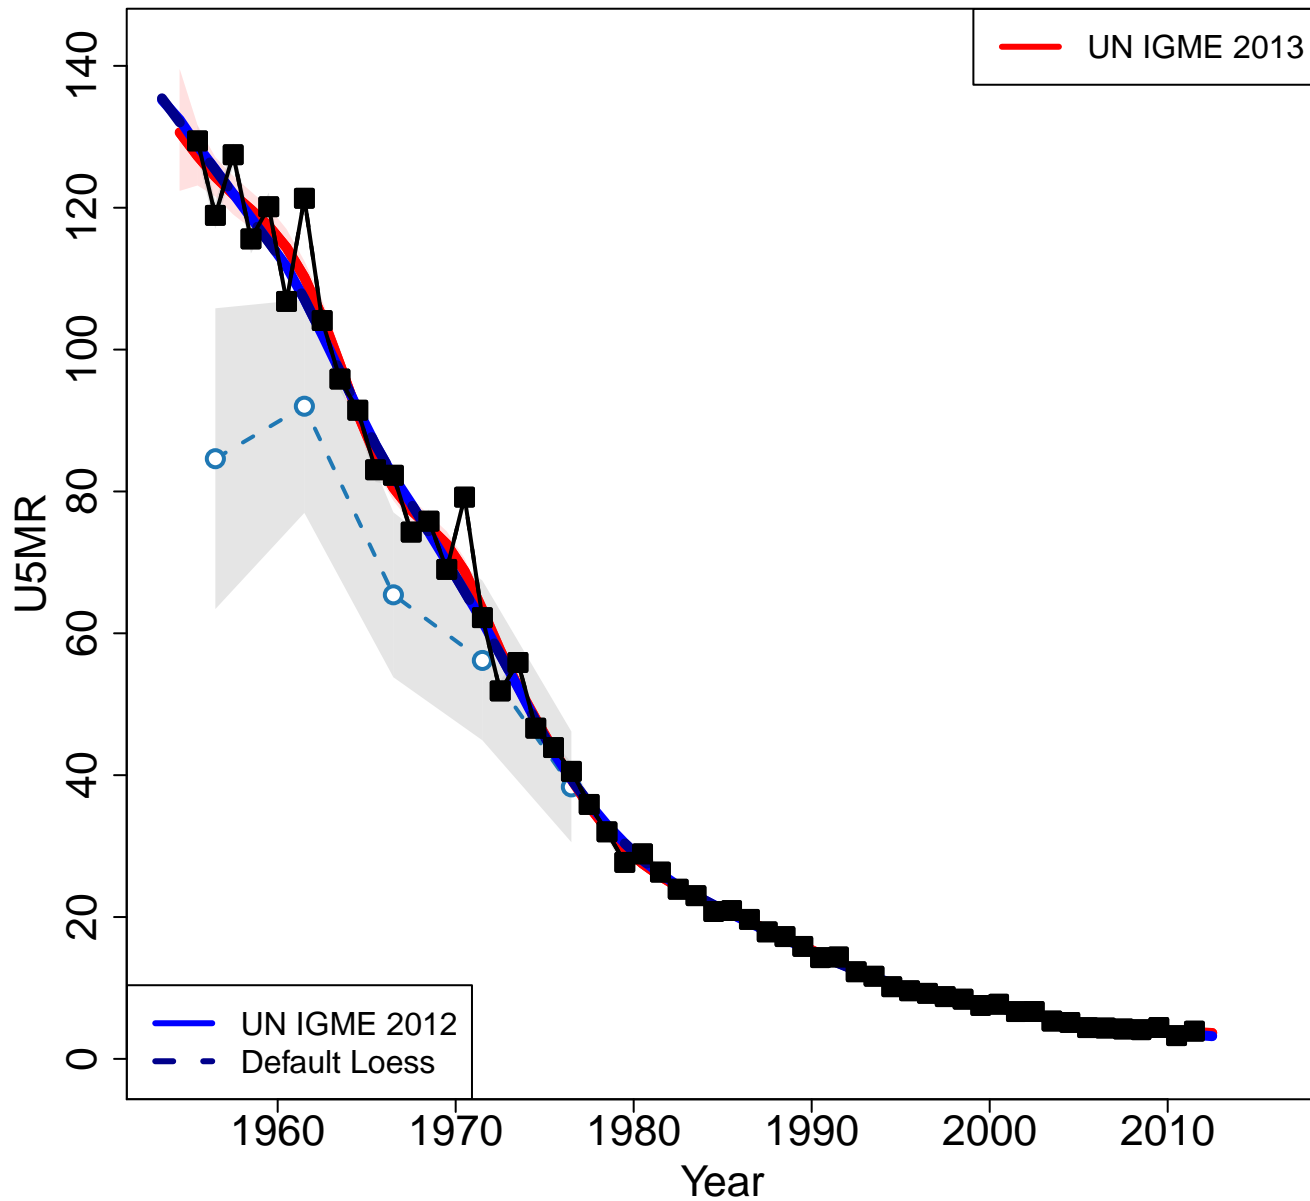

# Zoomed in

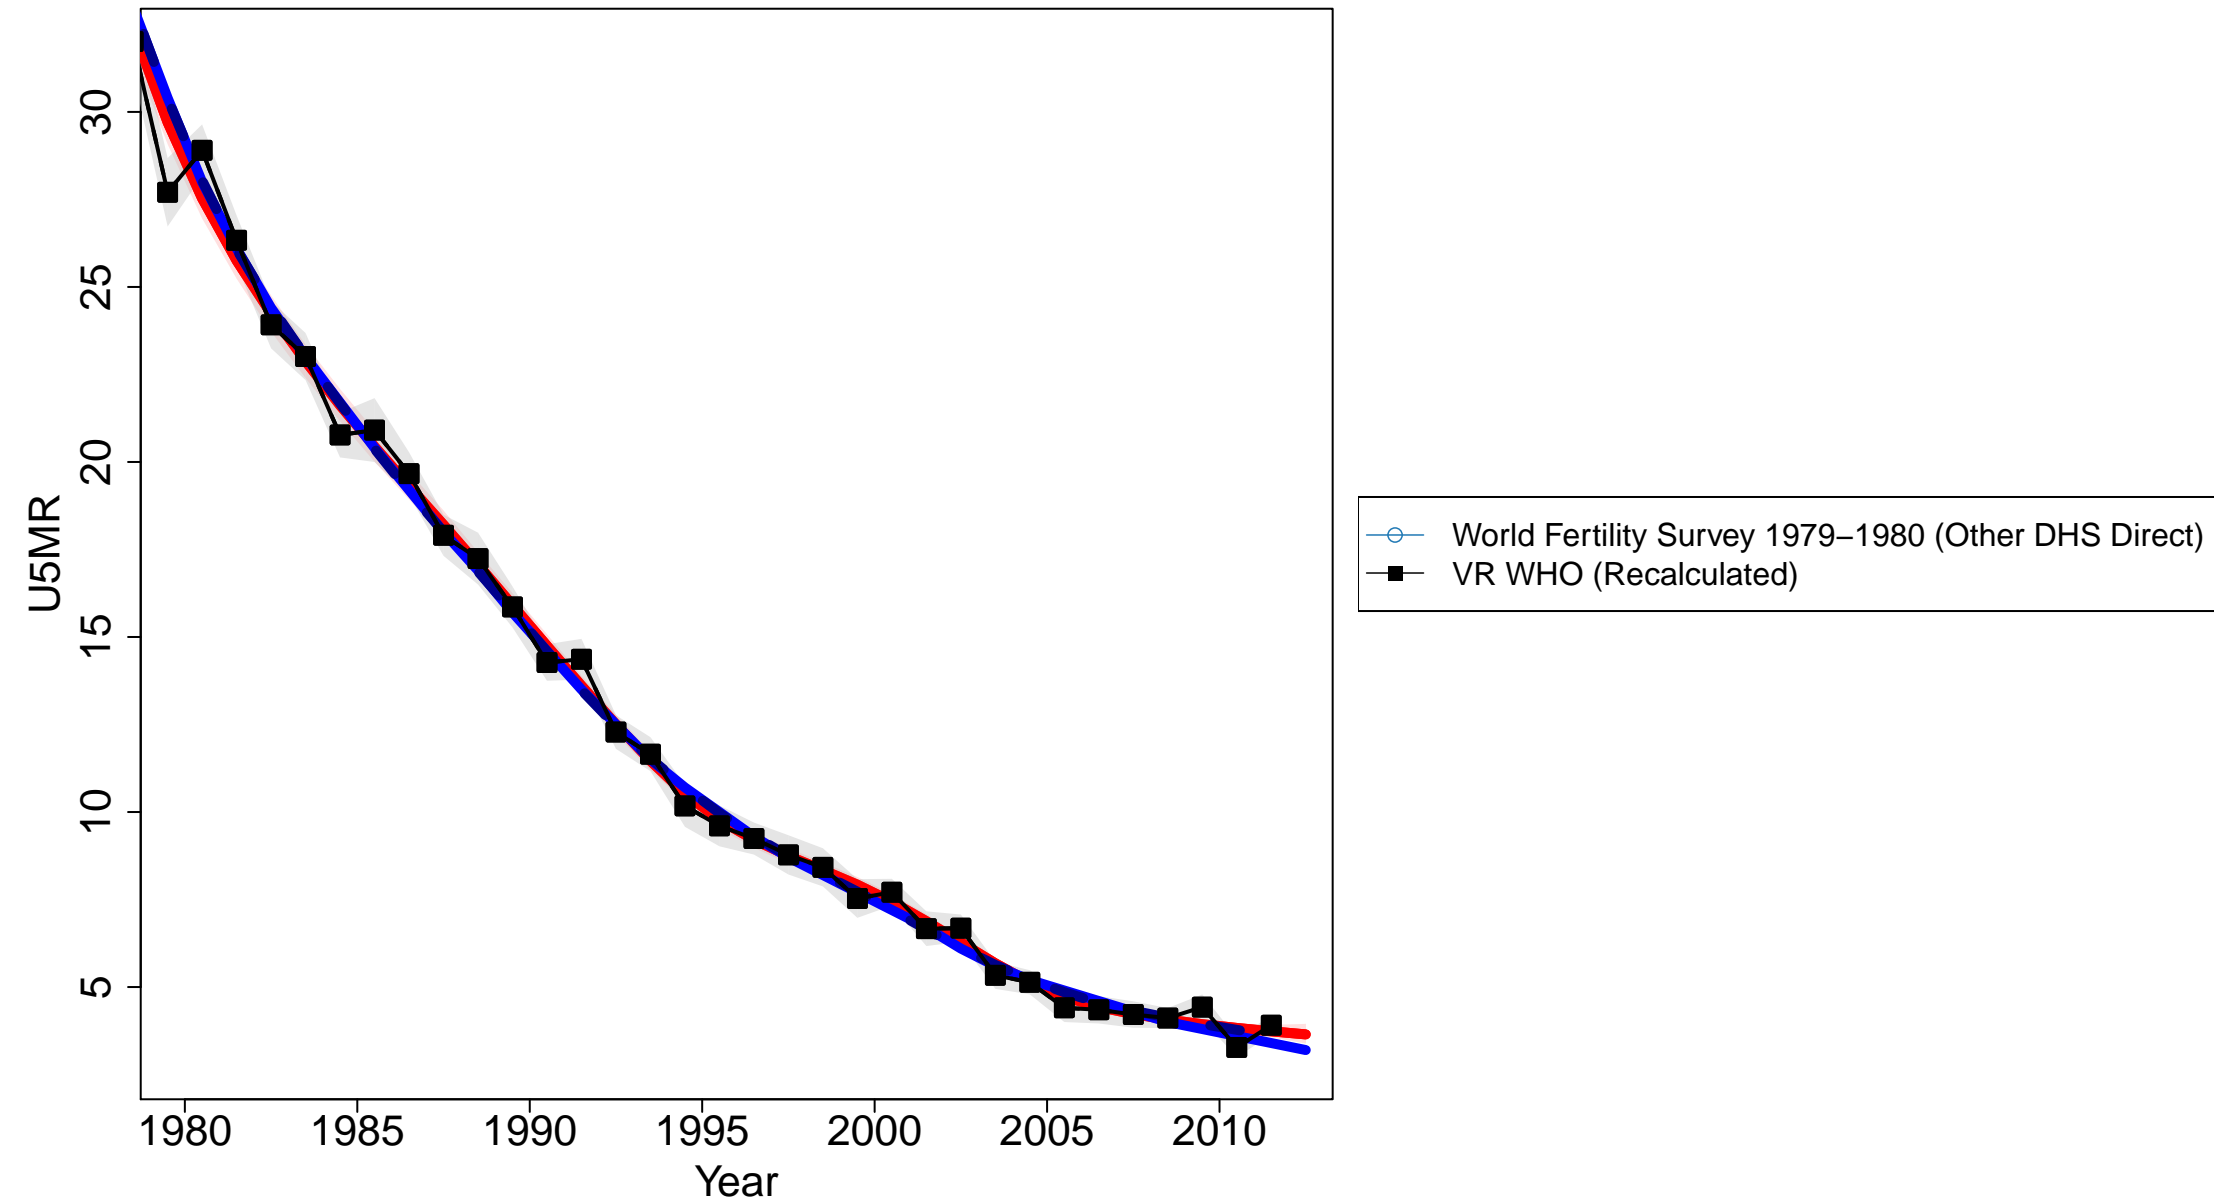

# Romania

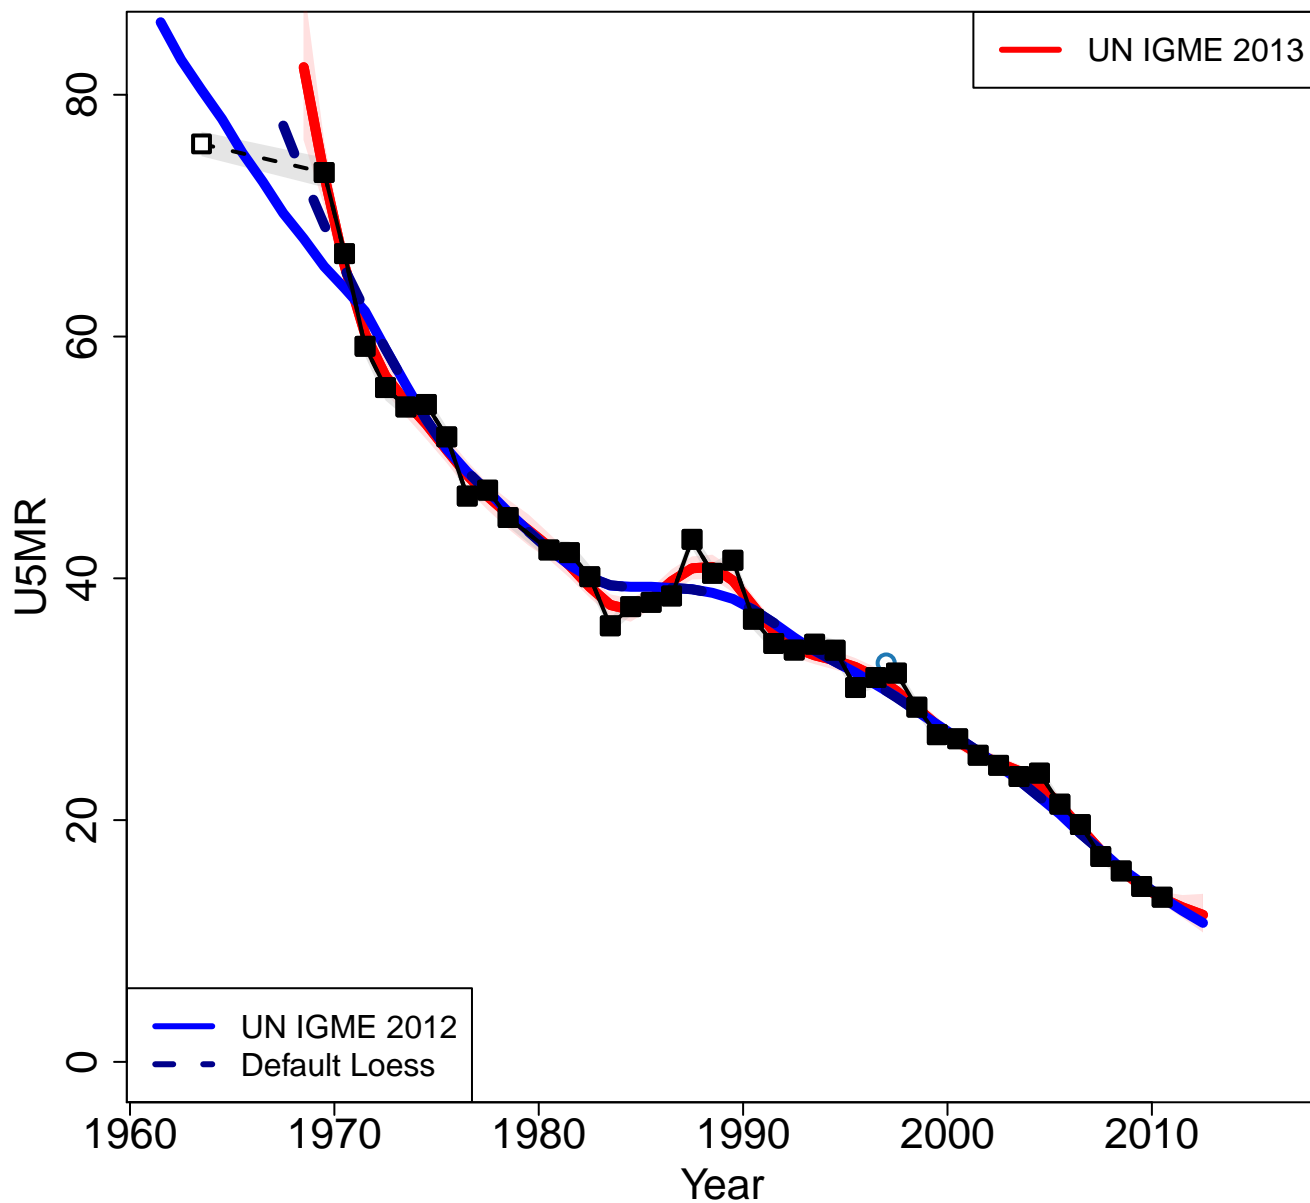

# Zoomed in

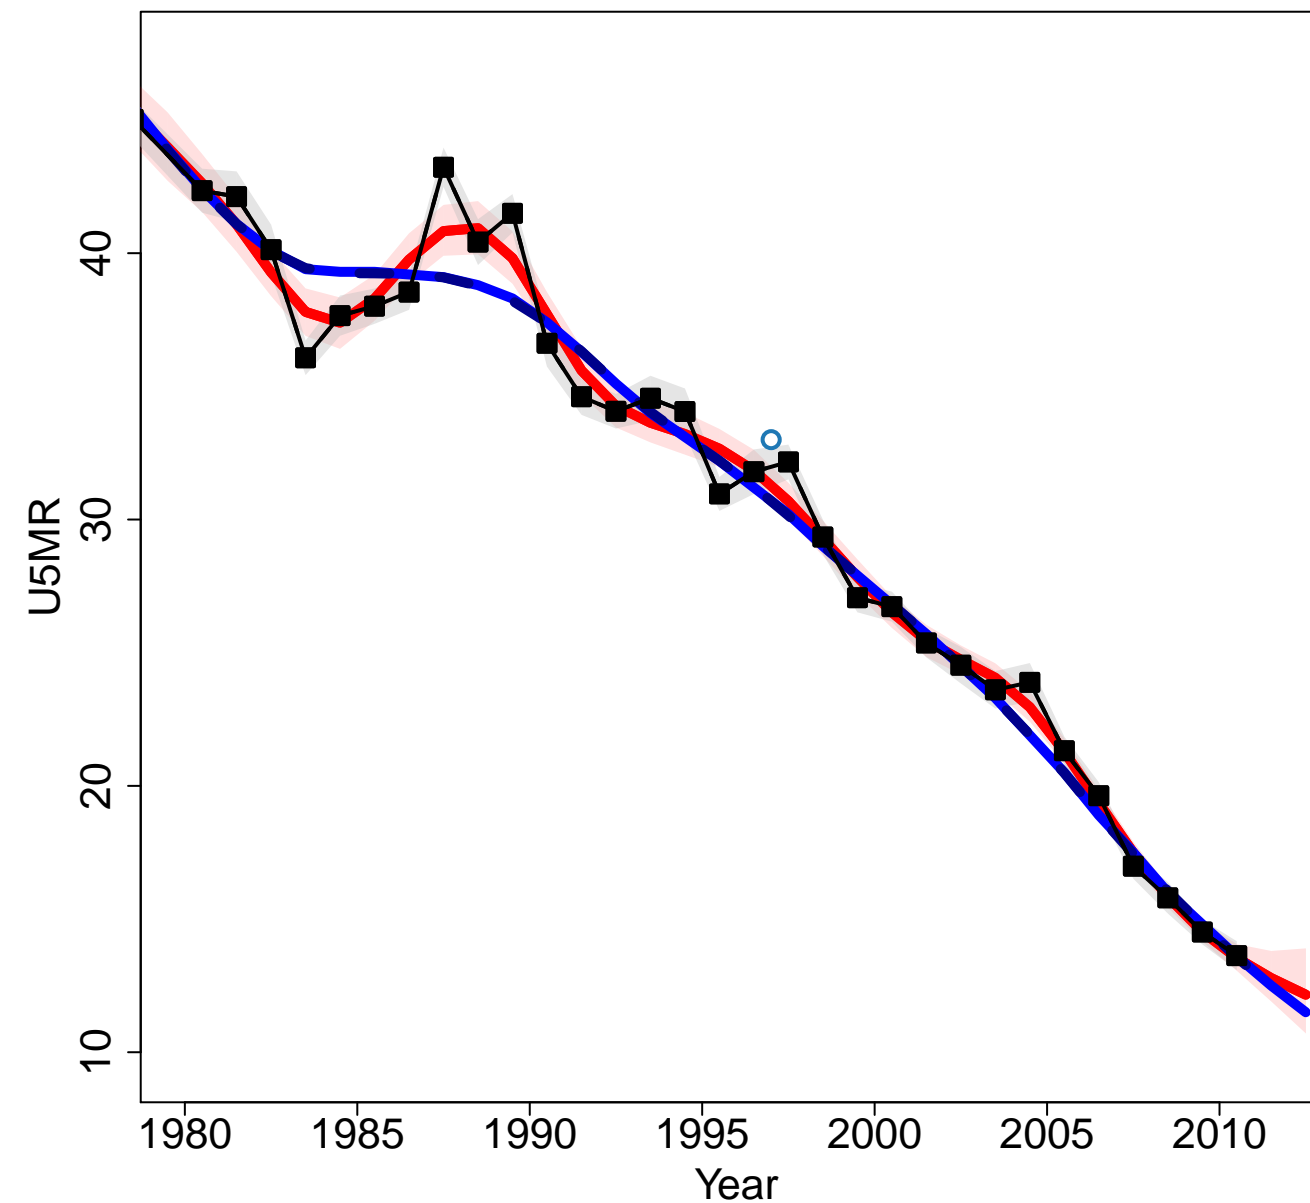

# Saint Lucia

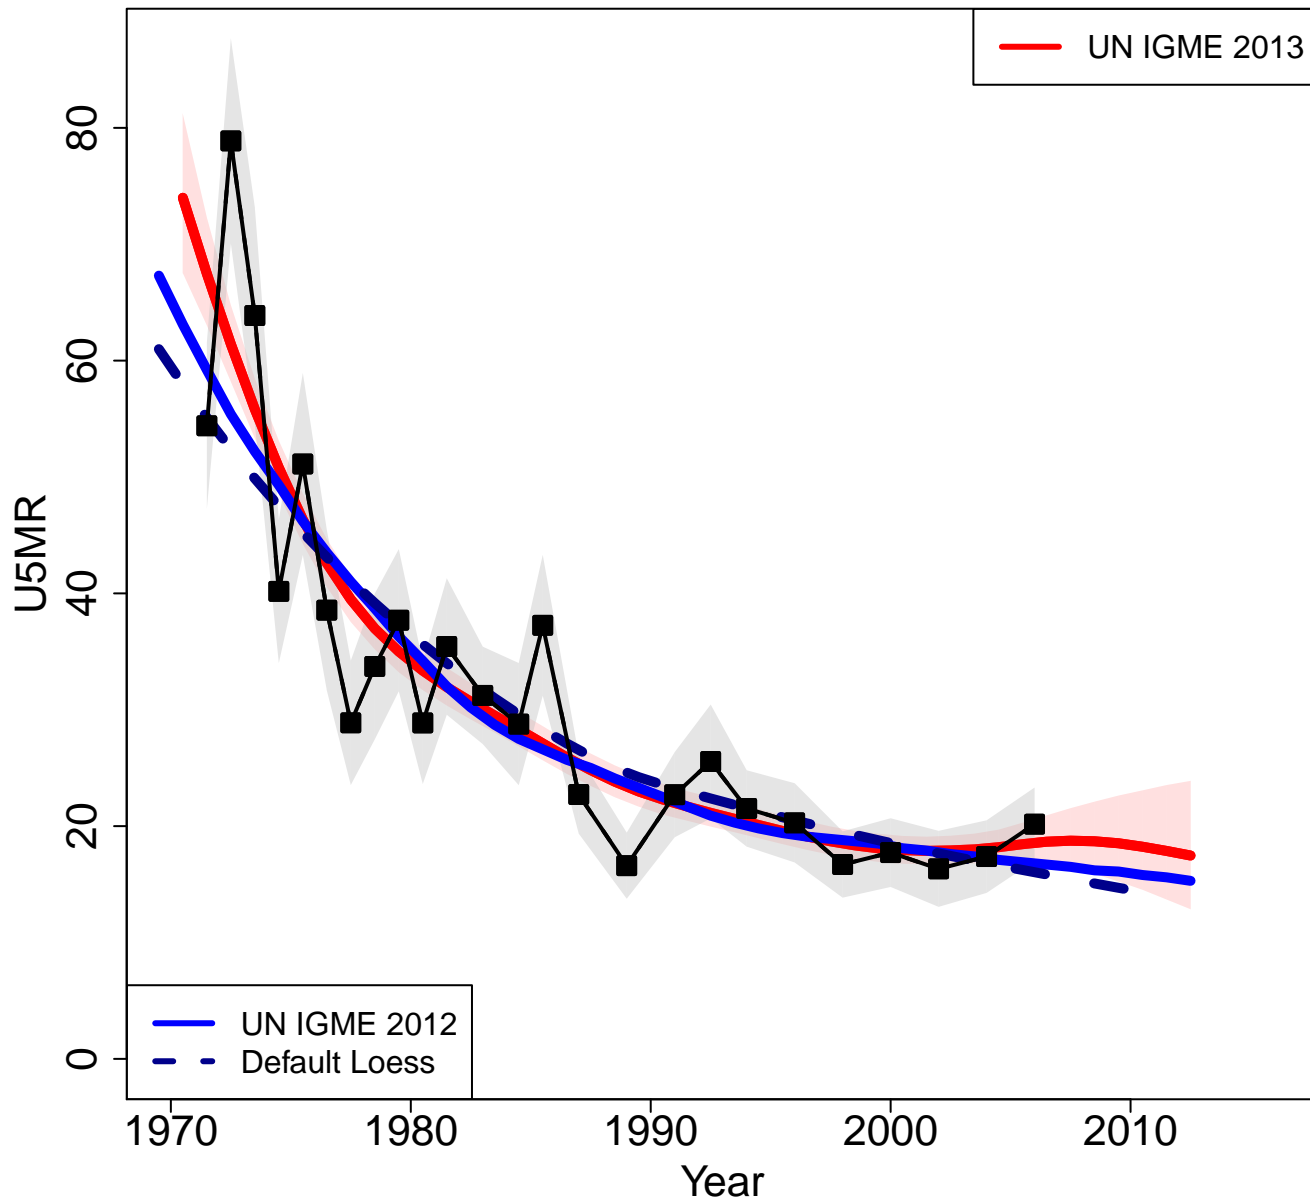

# Zoomed in

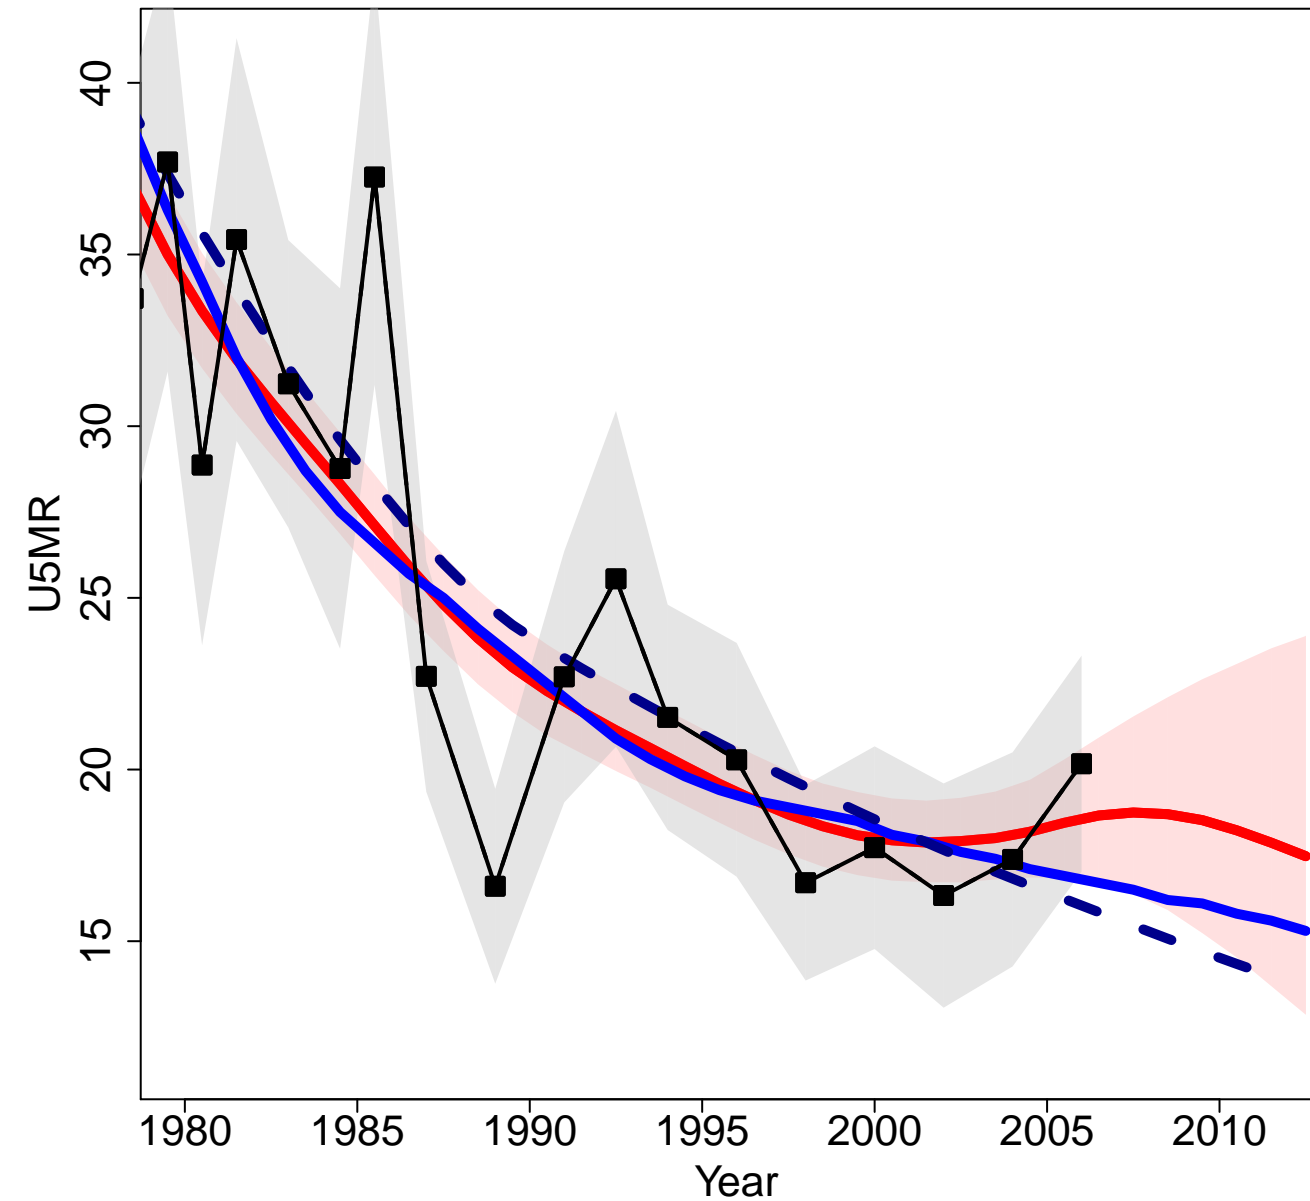



# St Vincent & the Grenadines

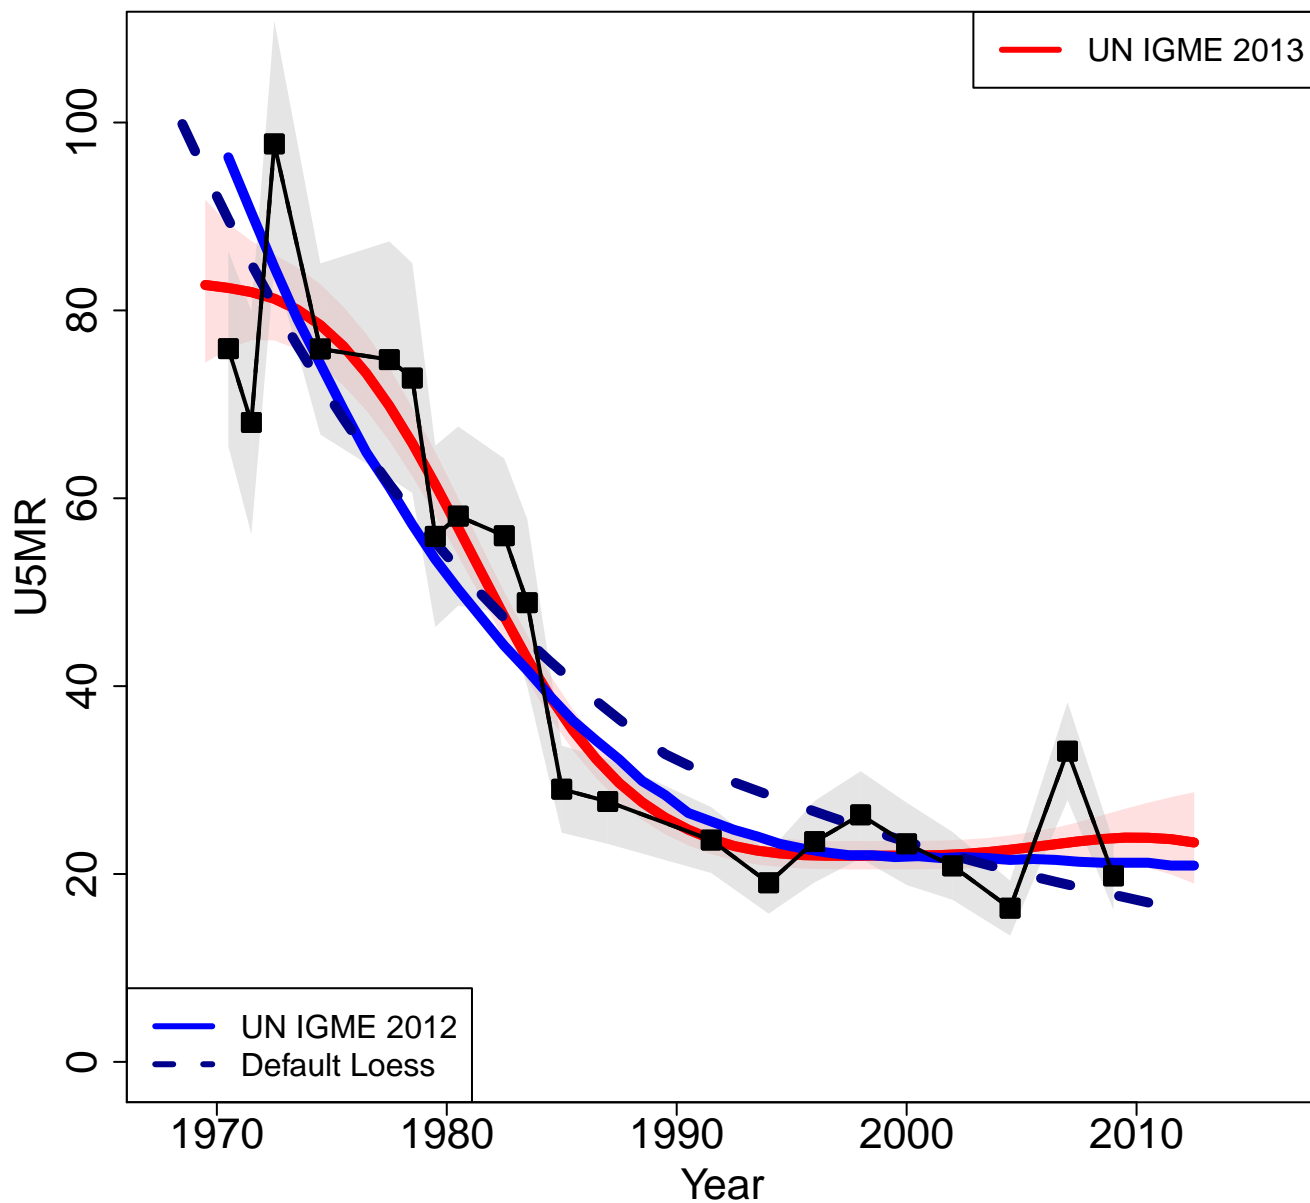

# Zoomed in

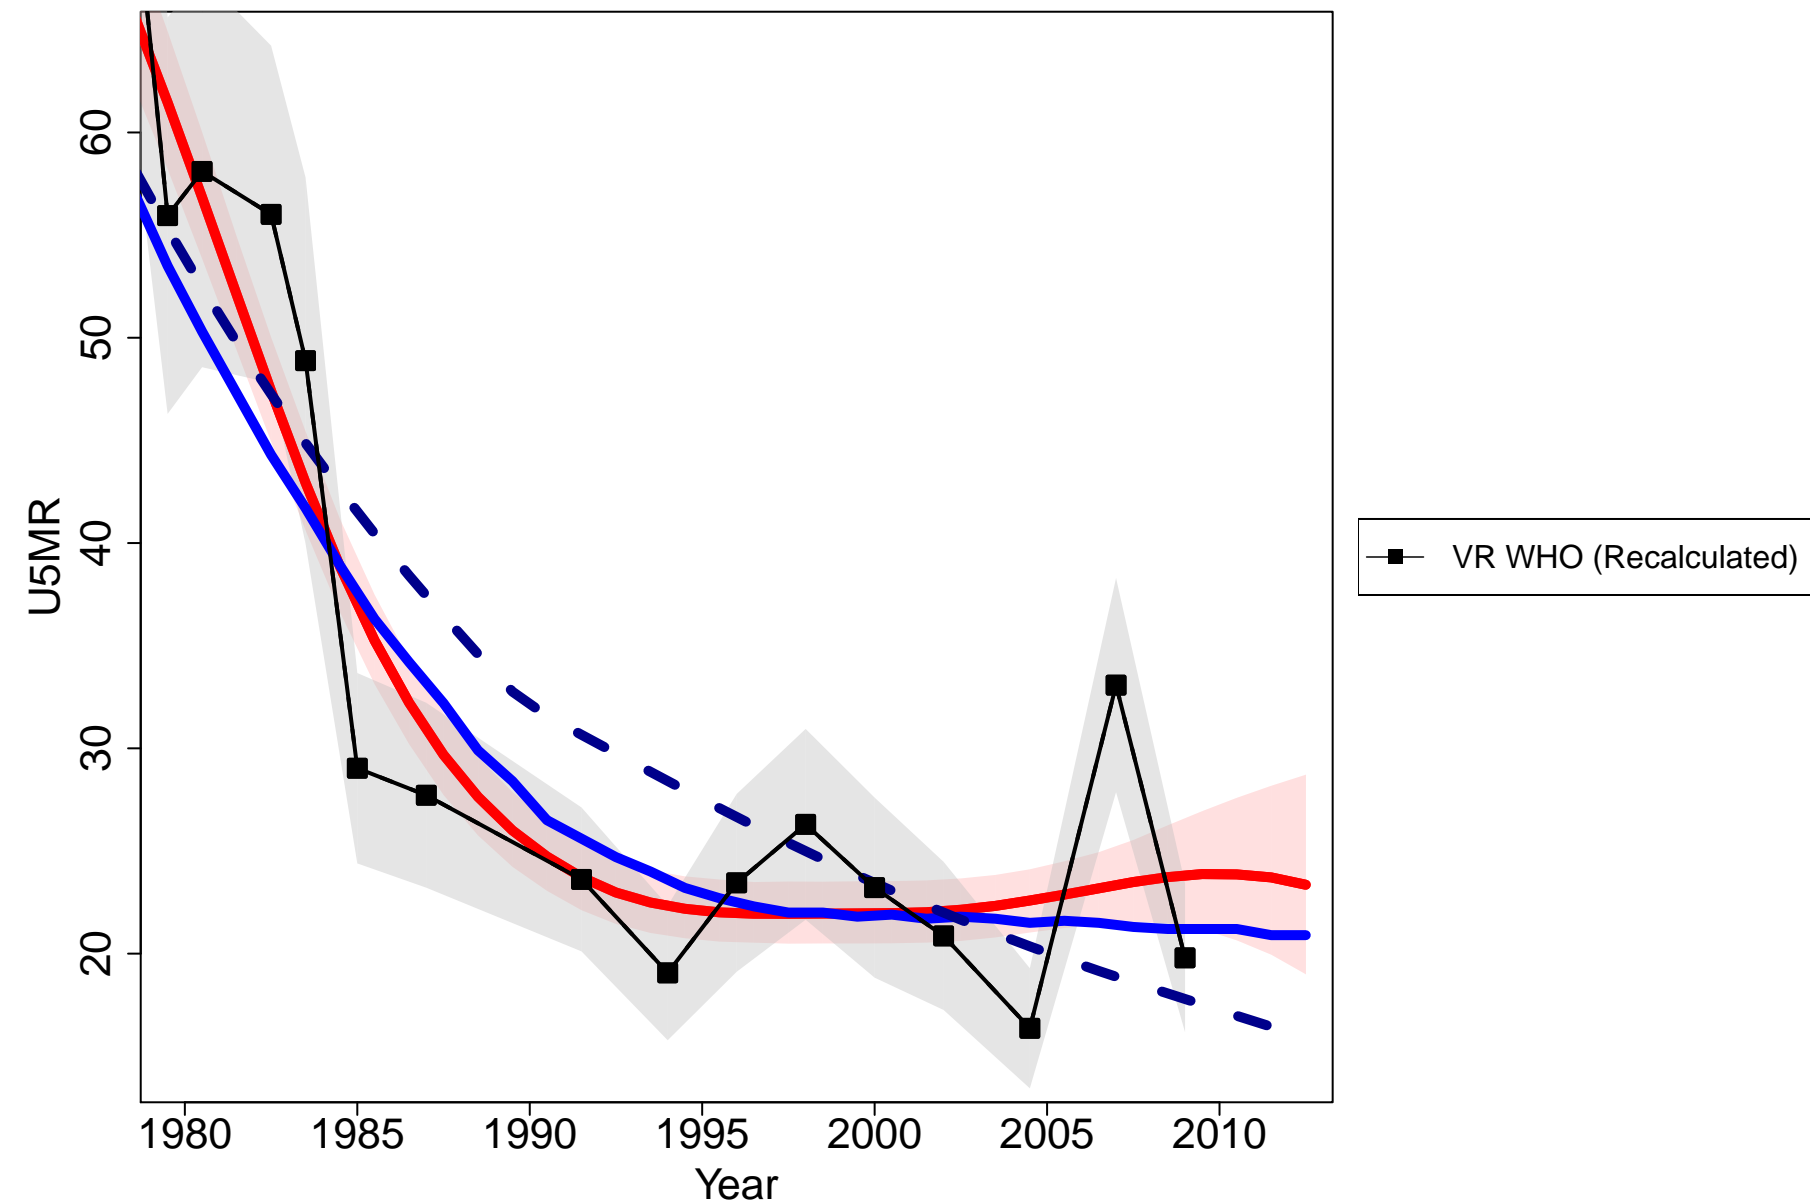

# San Marino

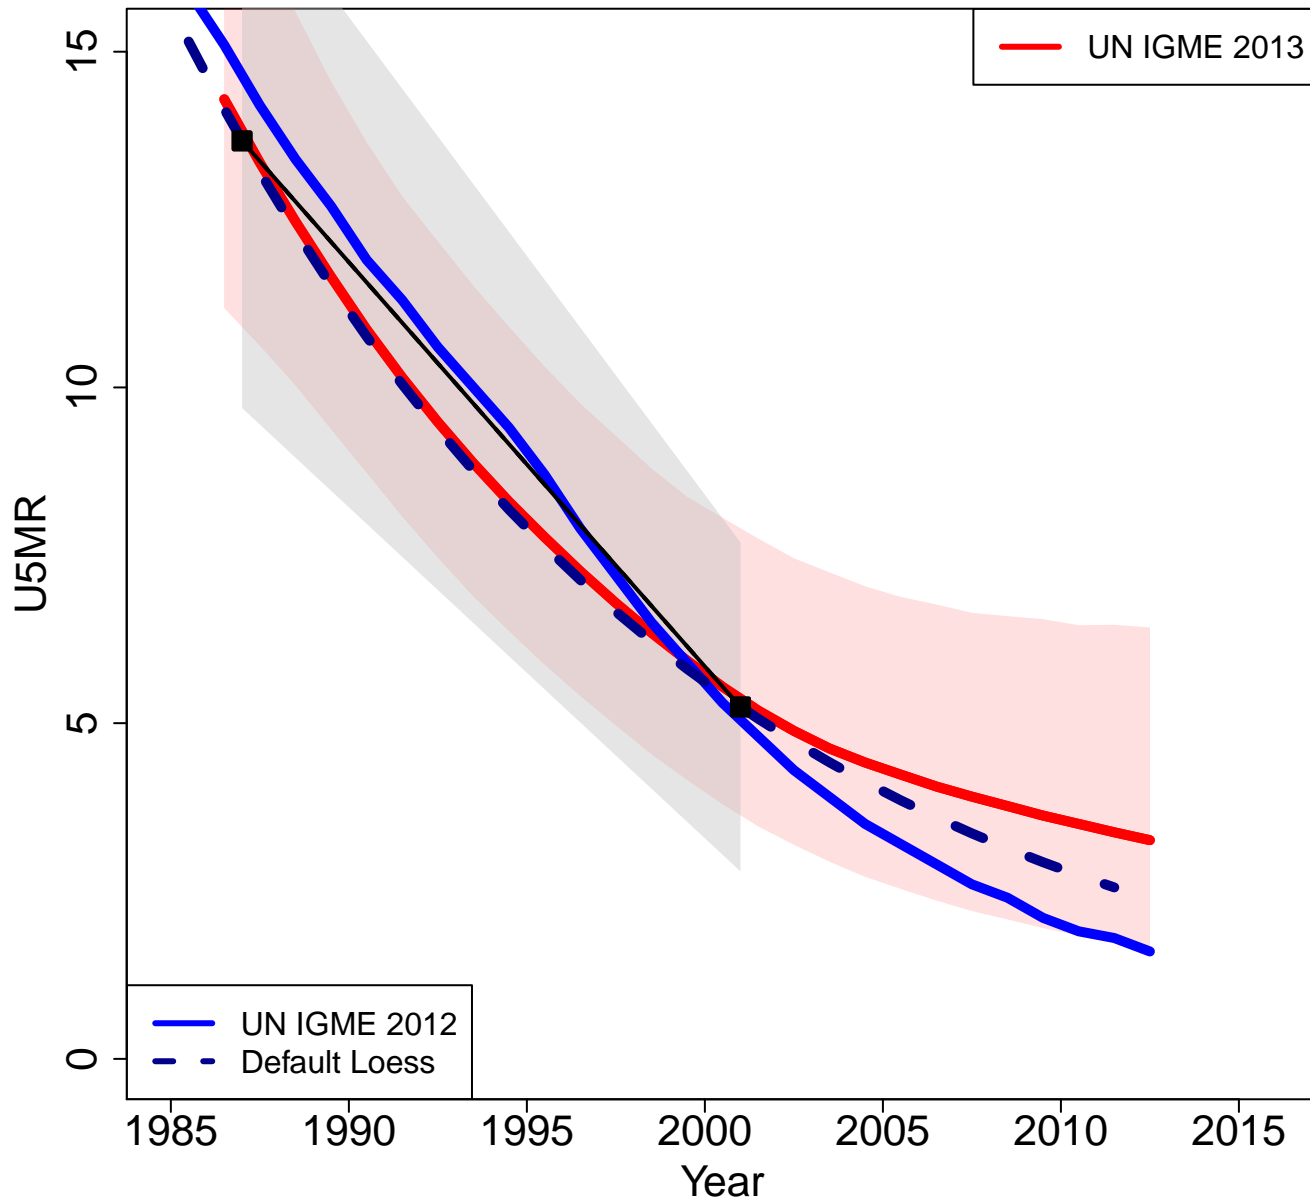

# Zoomed in

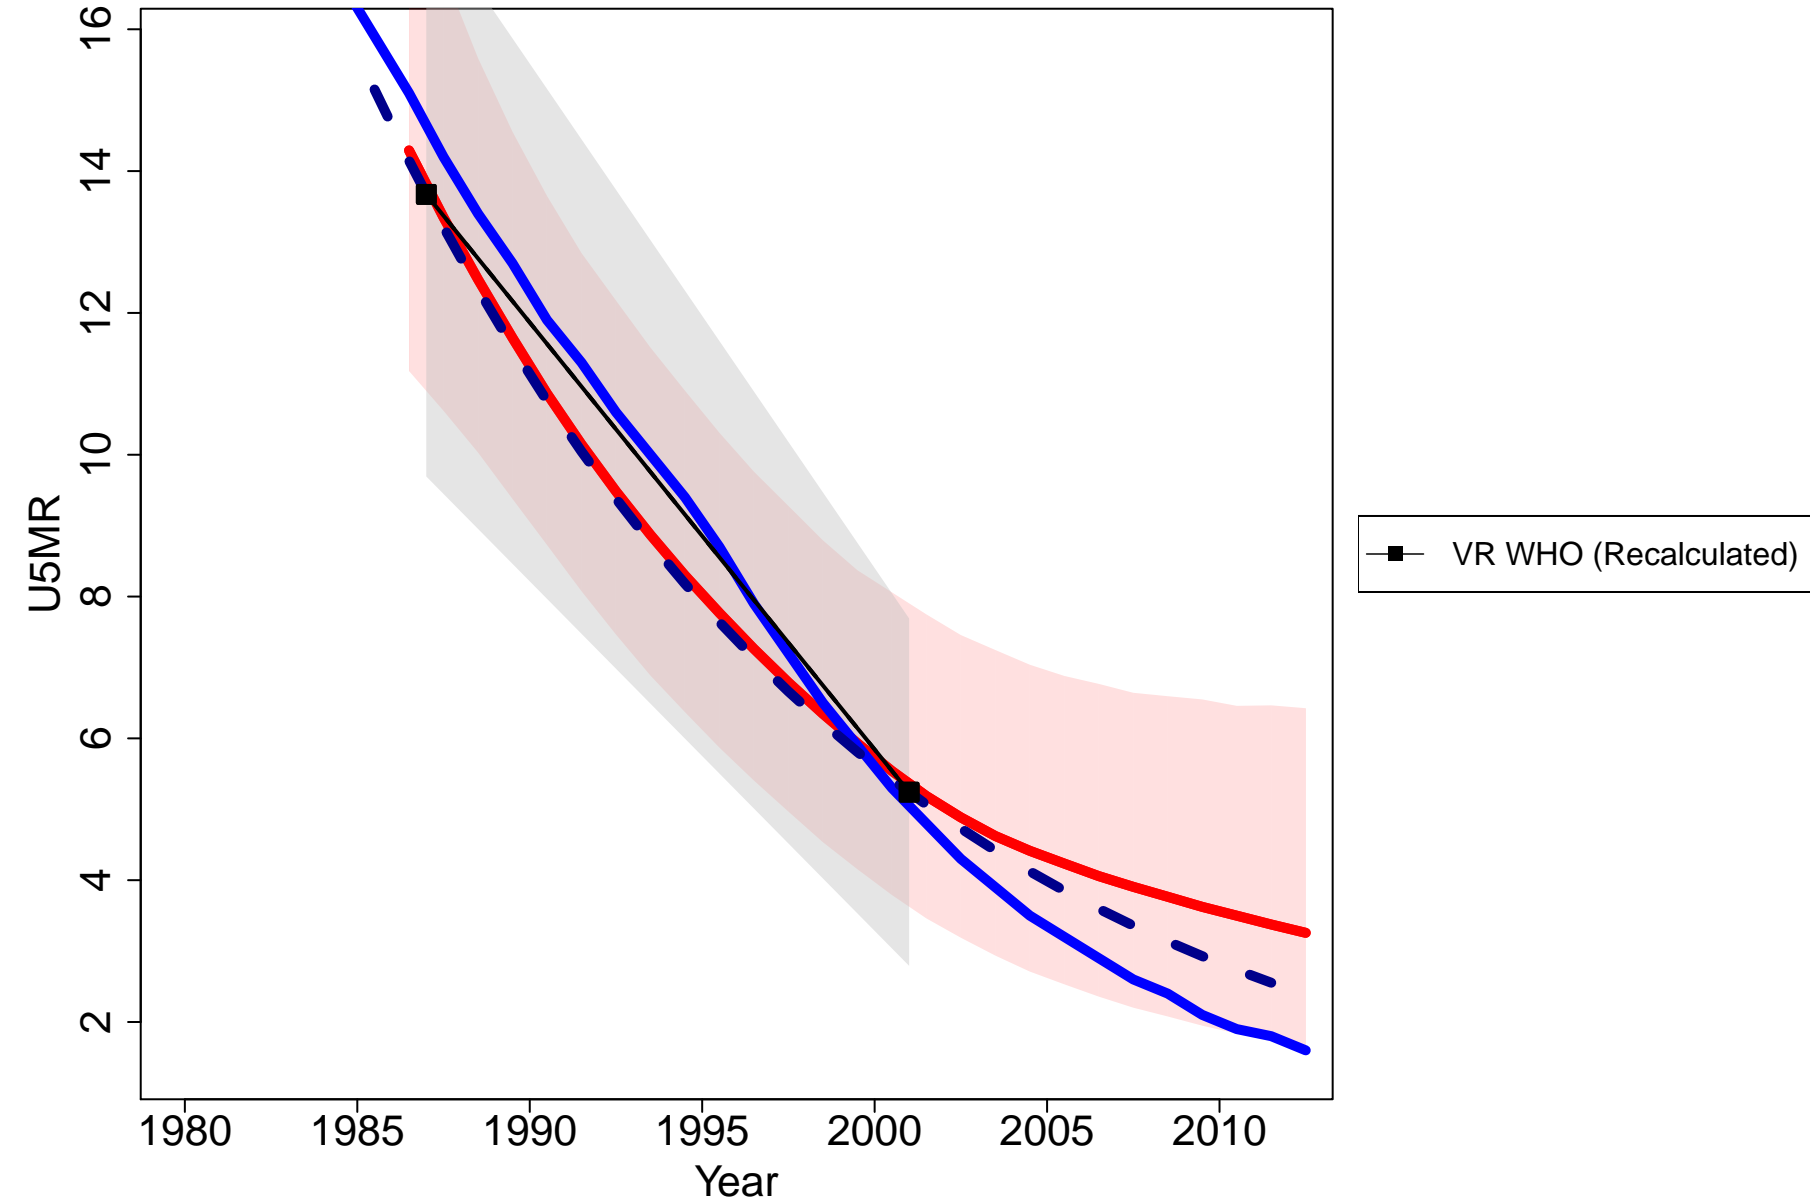

# Serbia

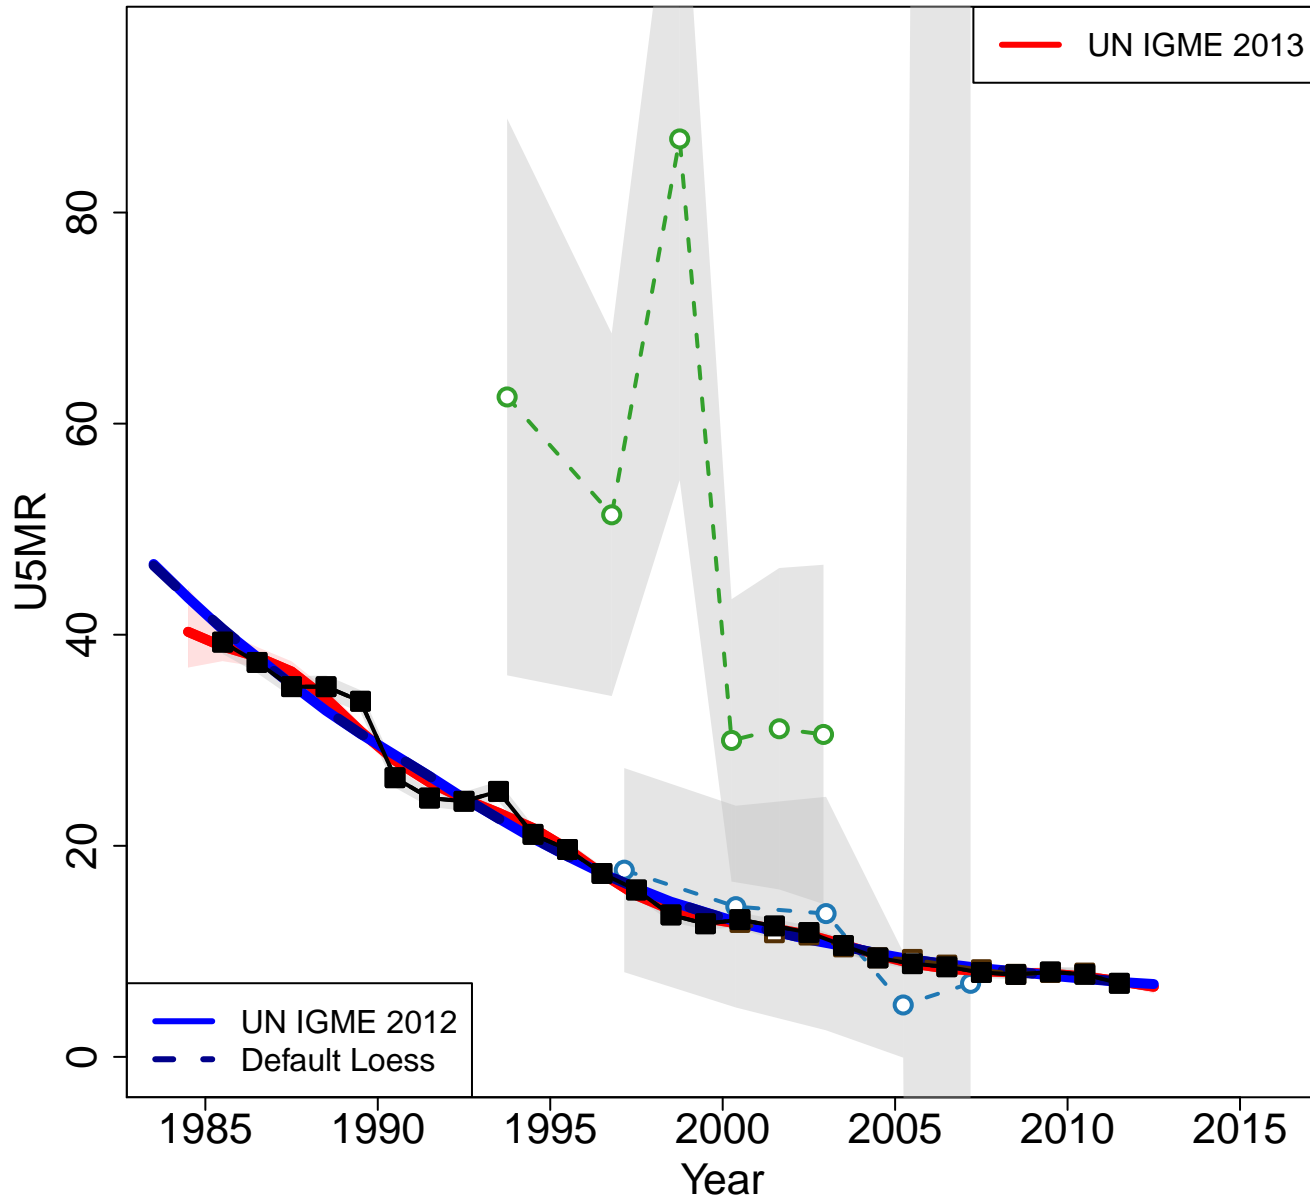

# Zoomed in

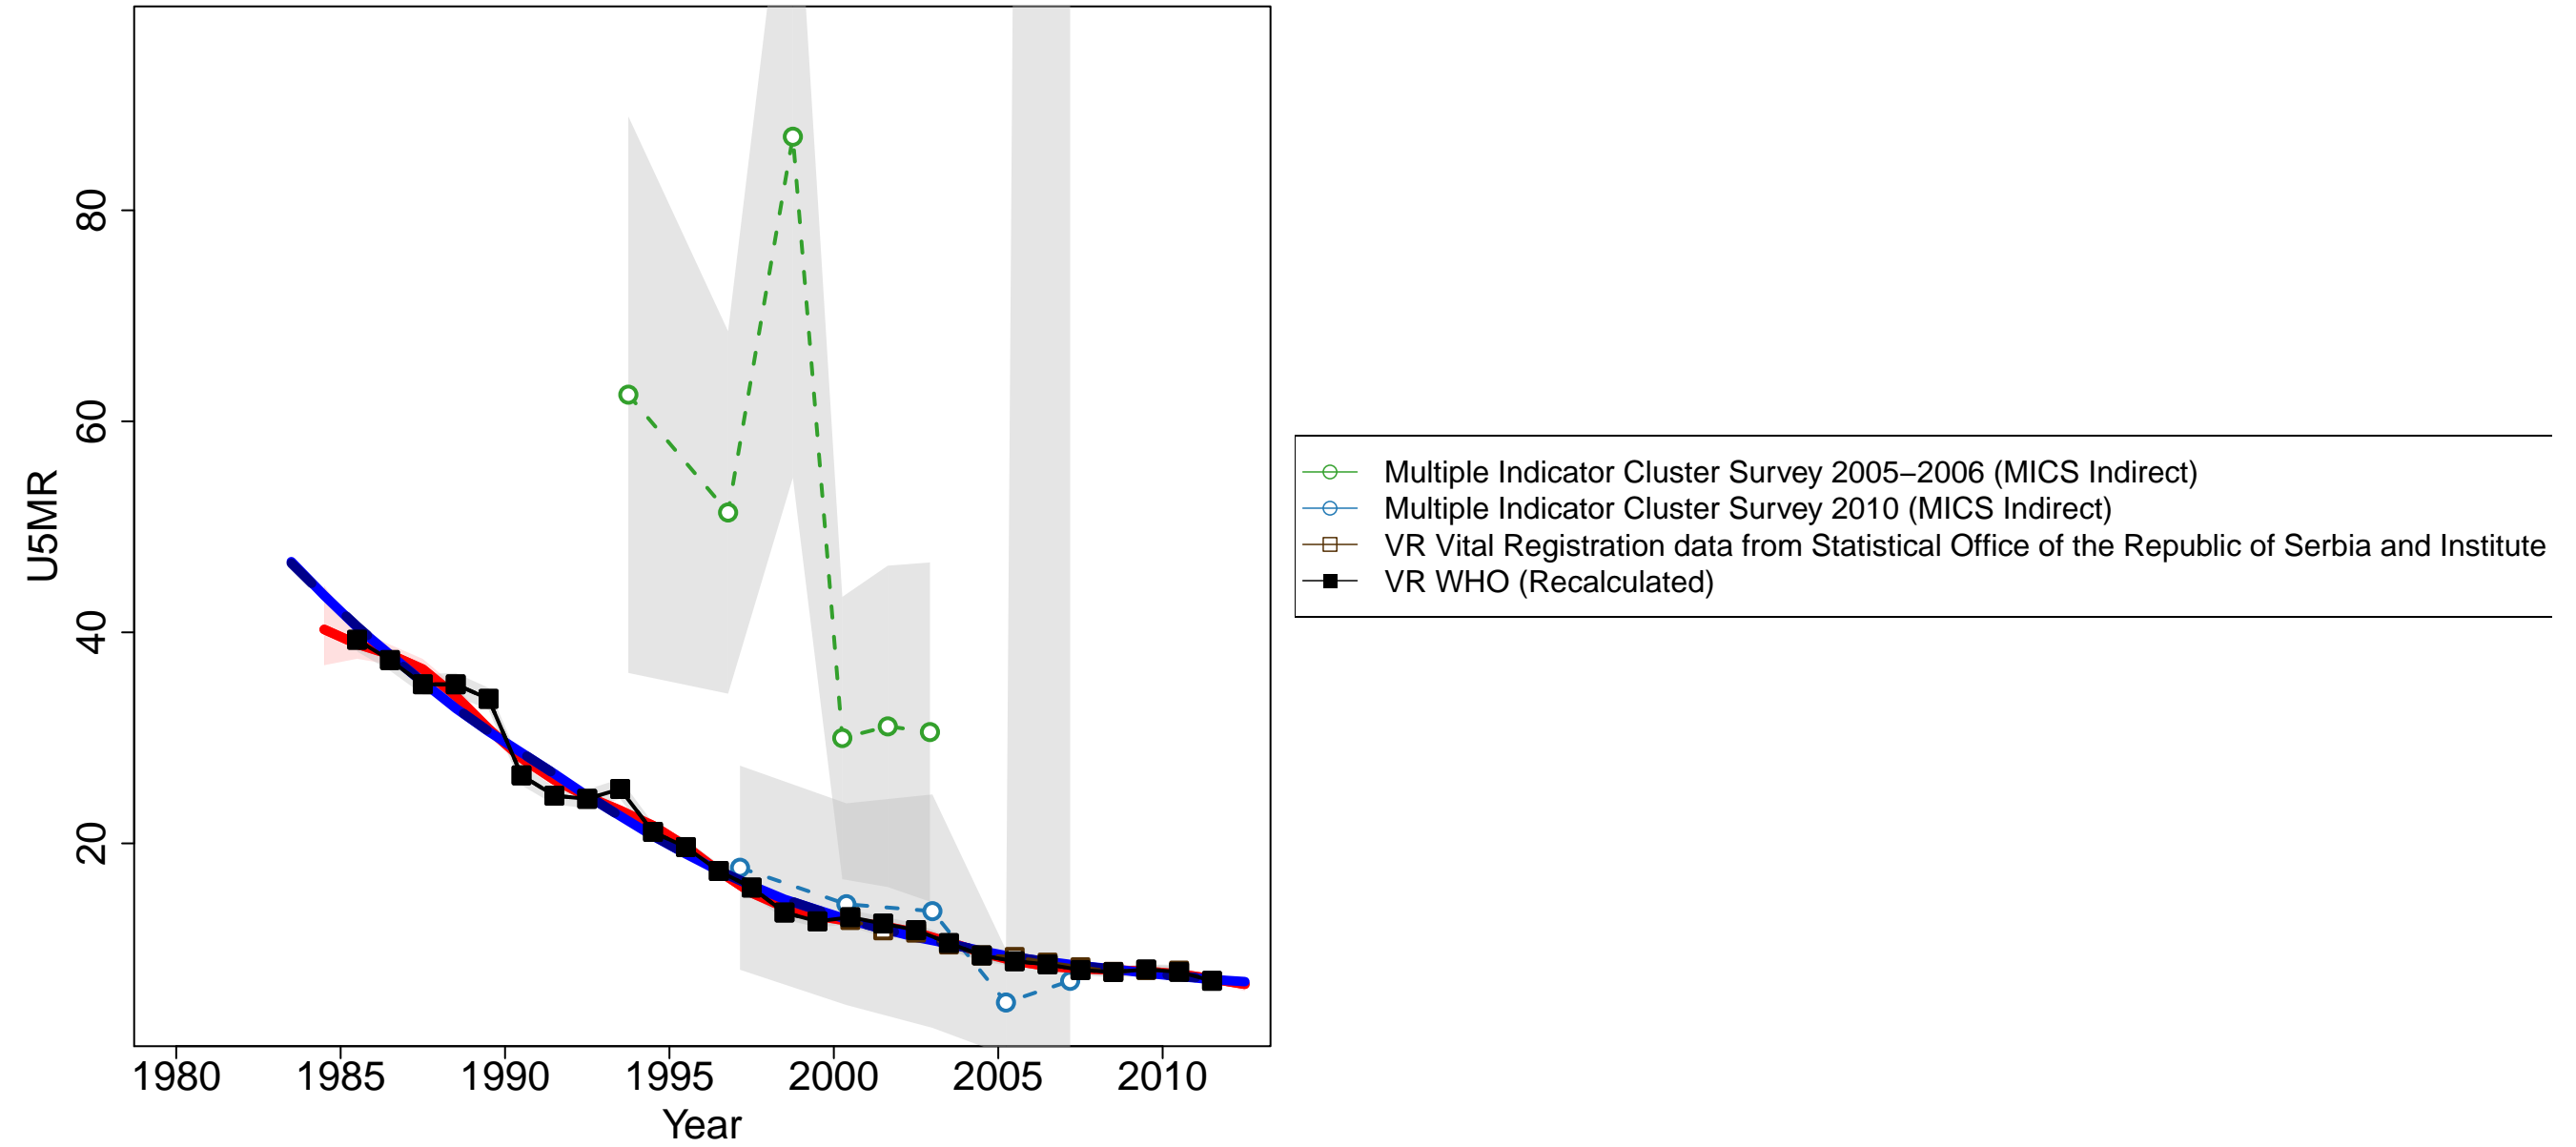

# Singapore

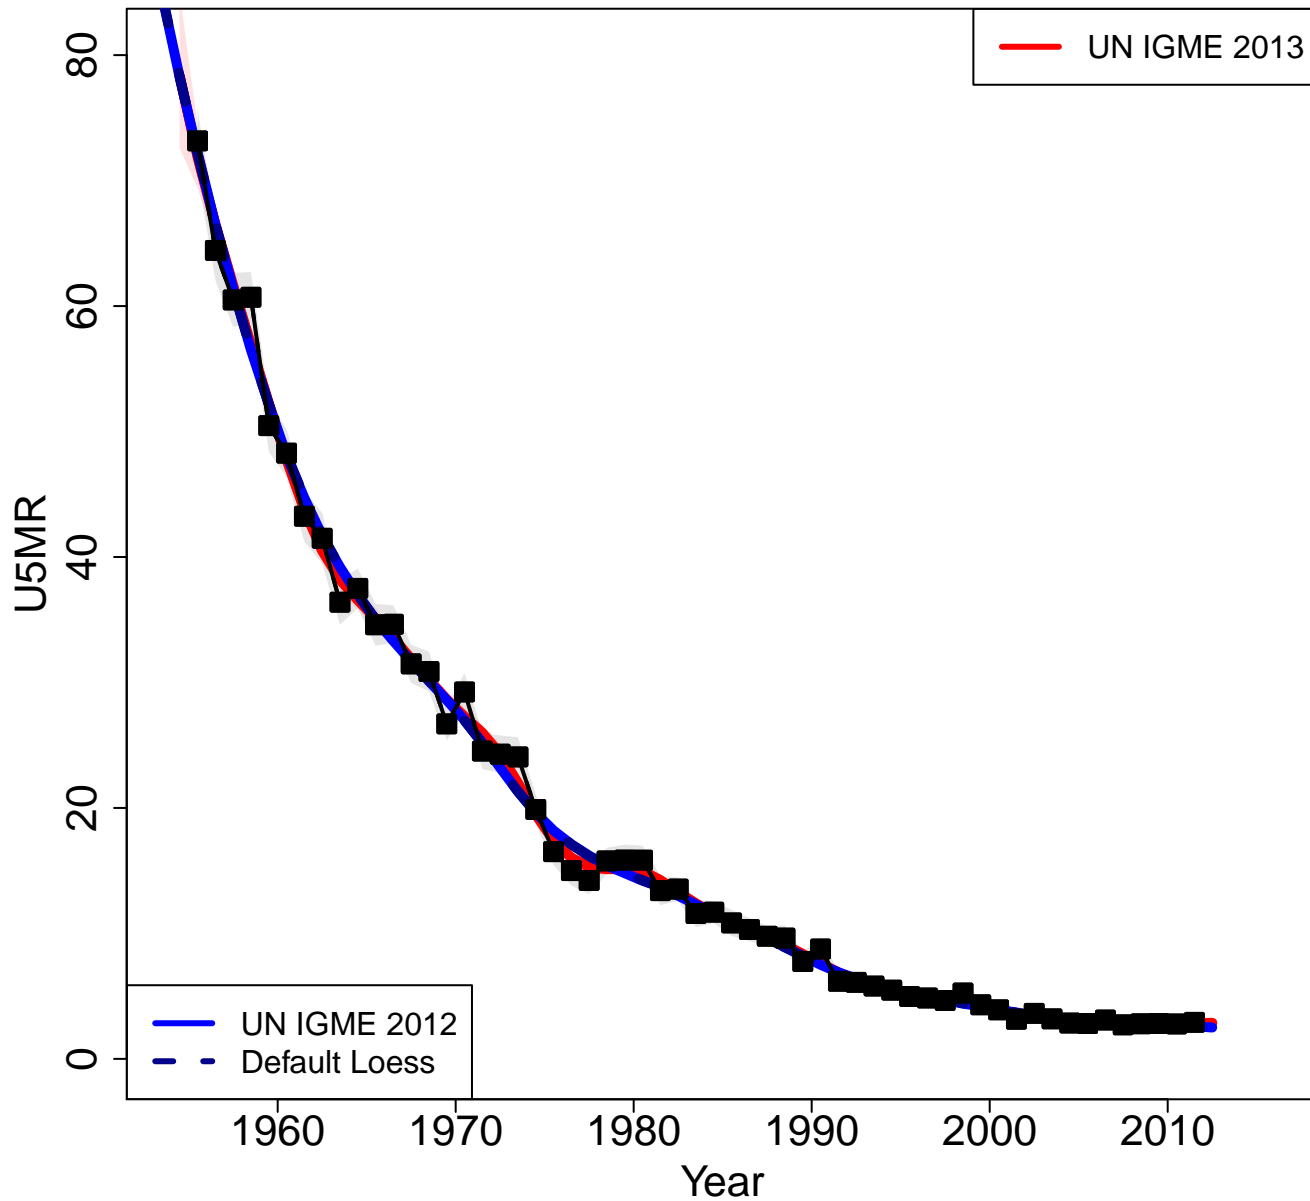

# Zoomed in

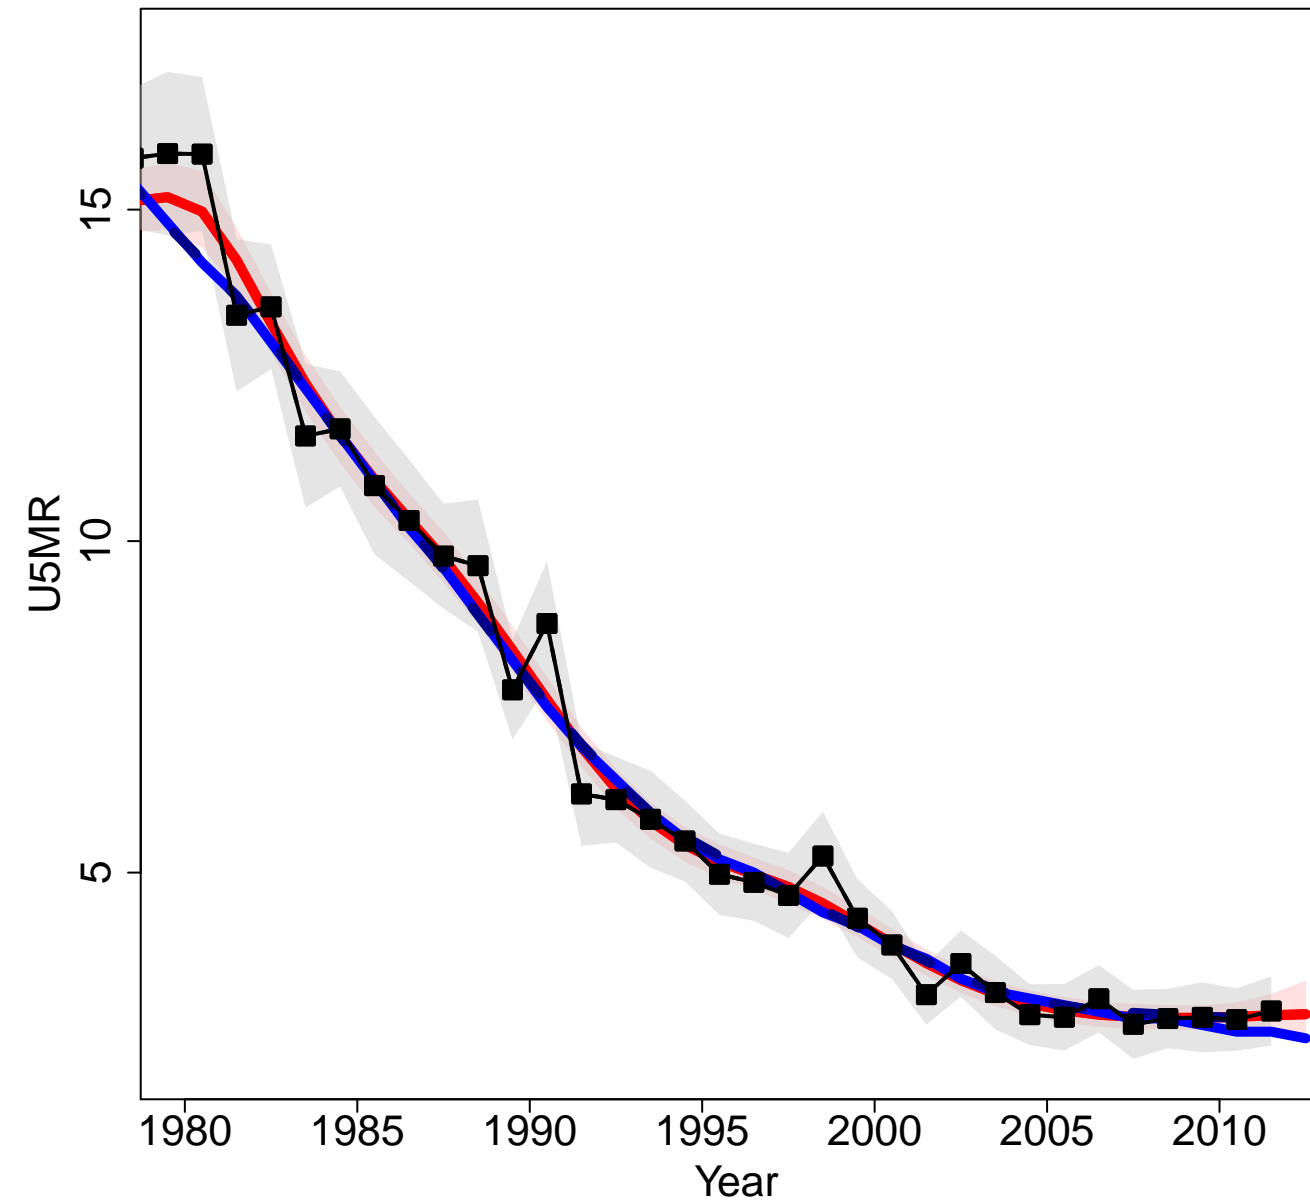

# Slovakia

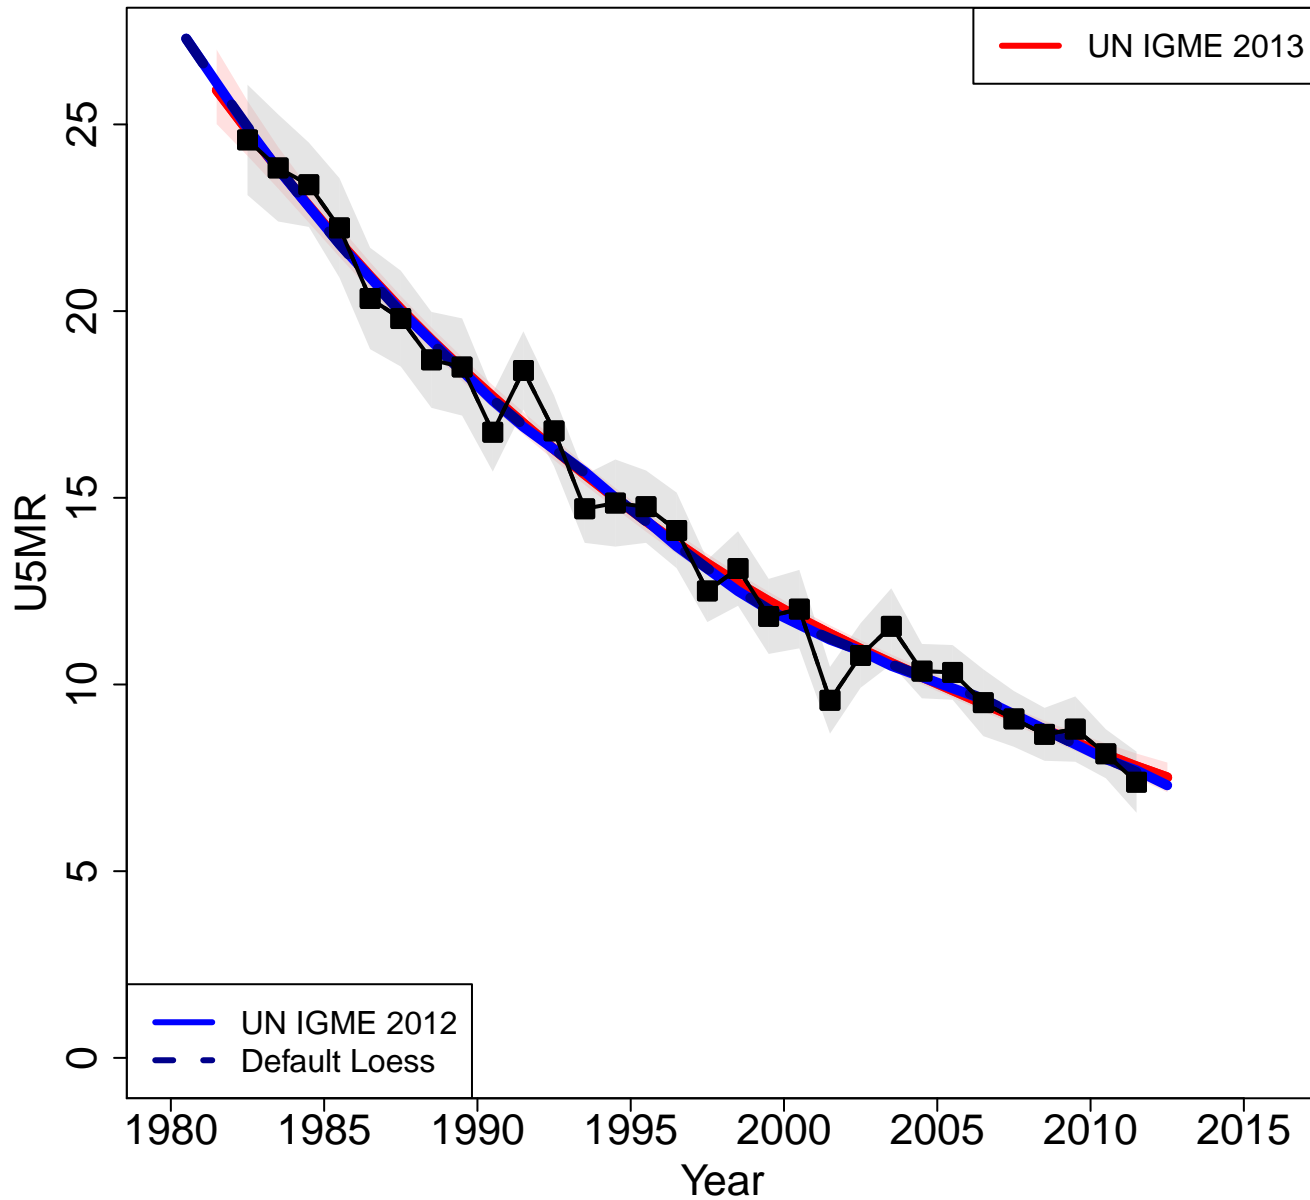

# Zoomed in

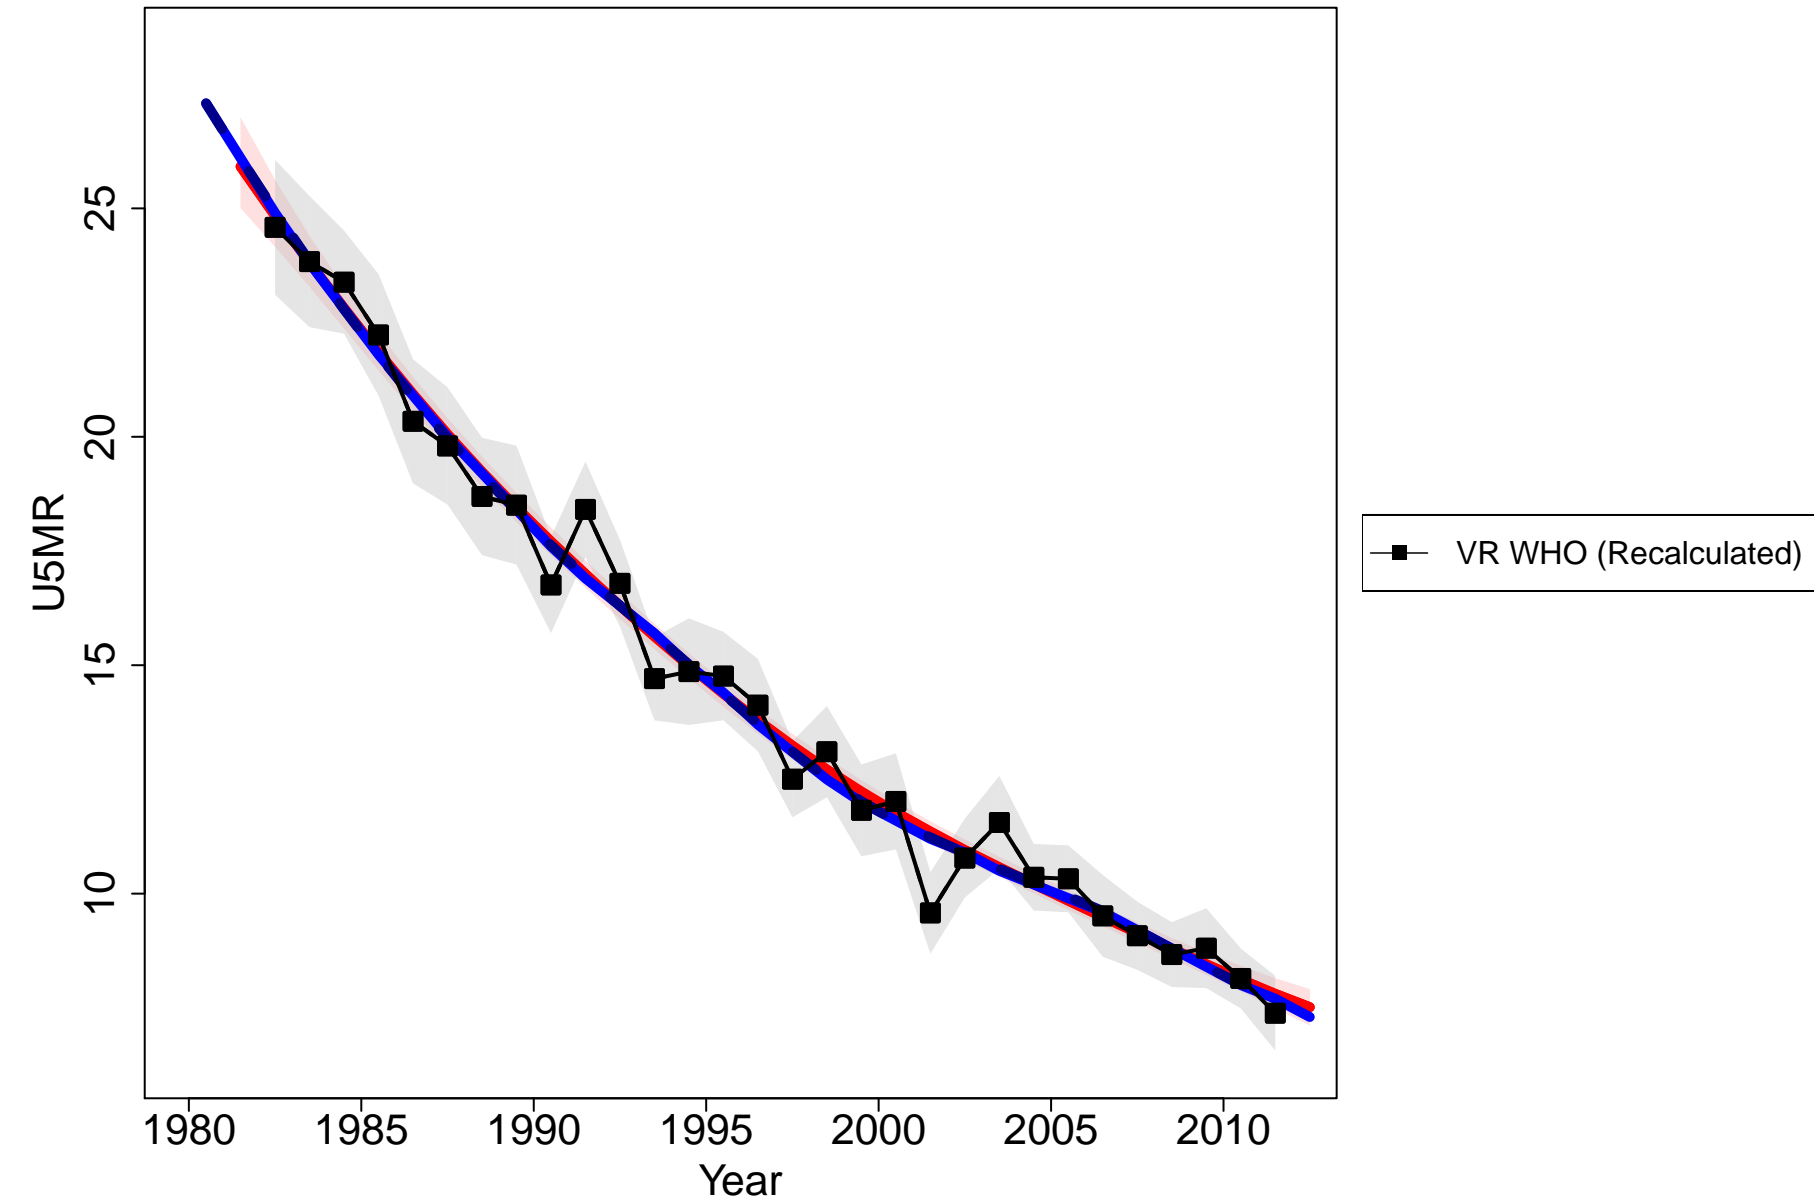

# Slovenia

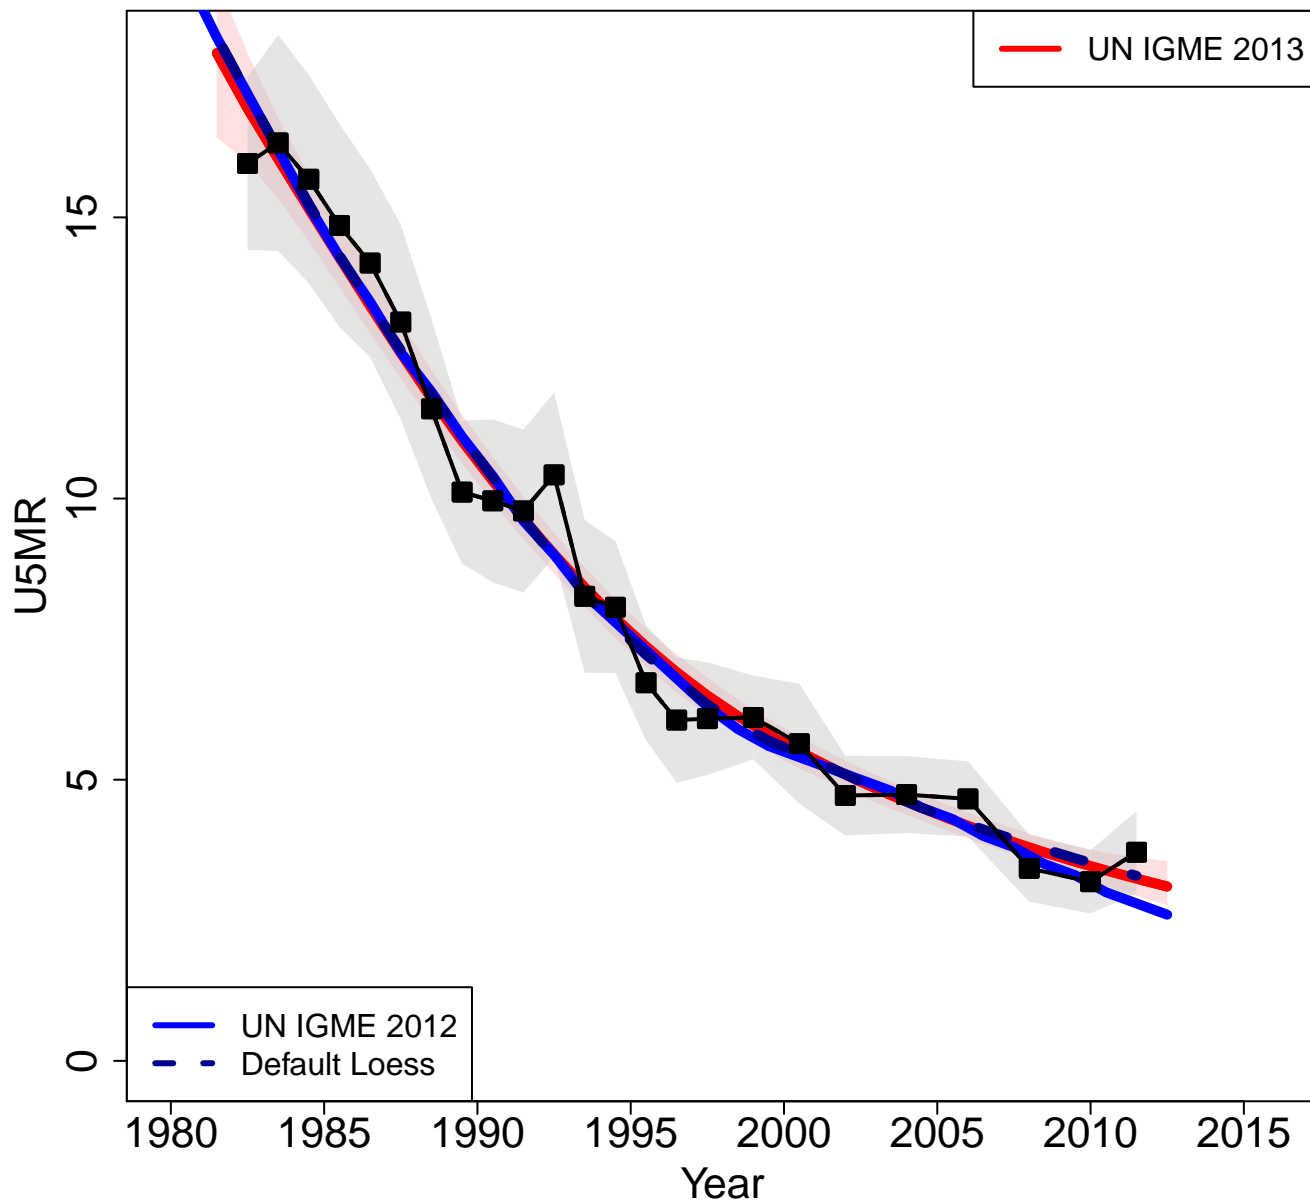

# Zoomed in

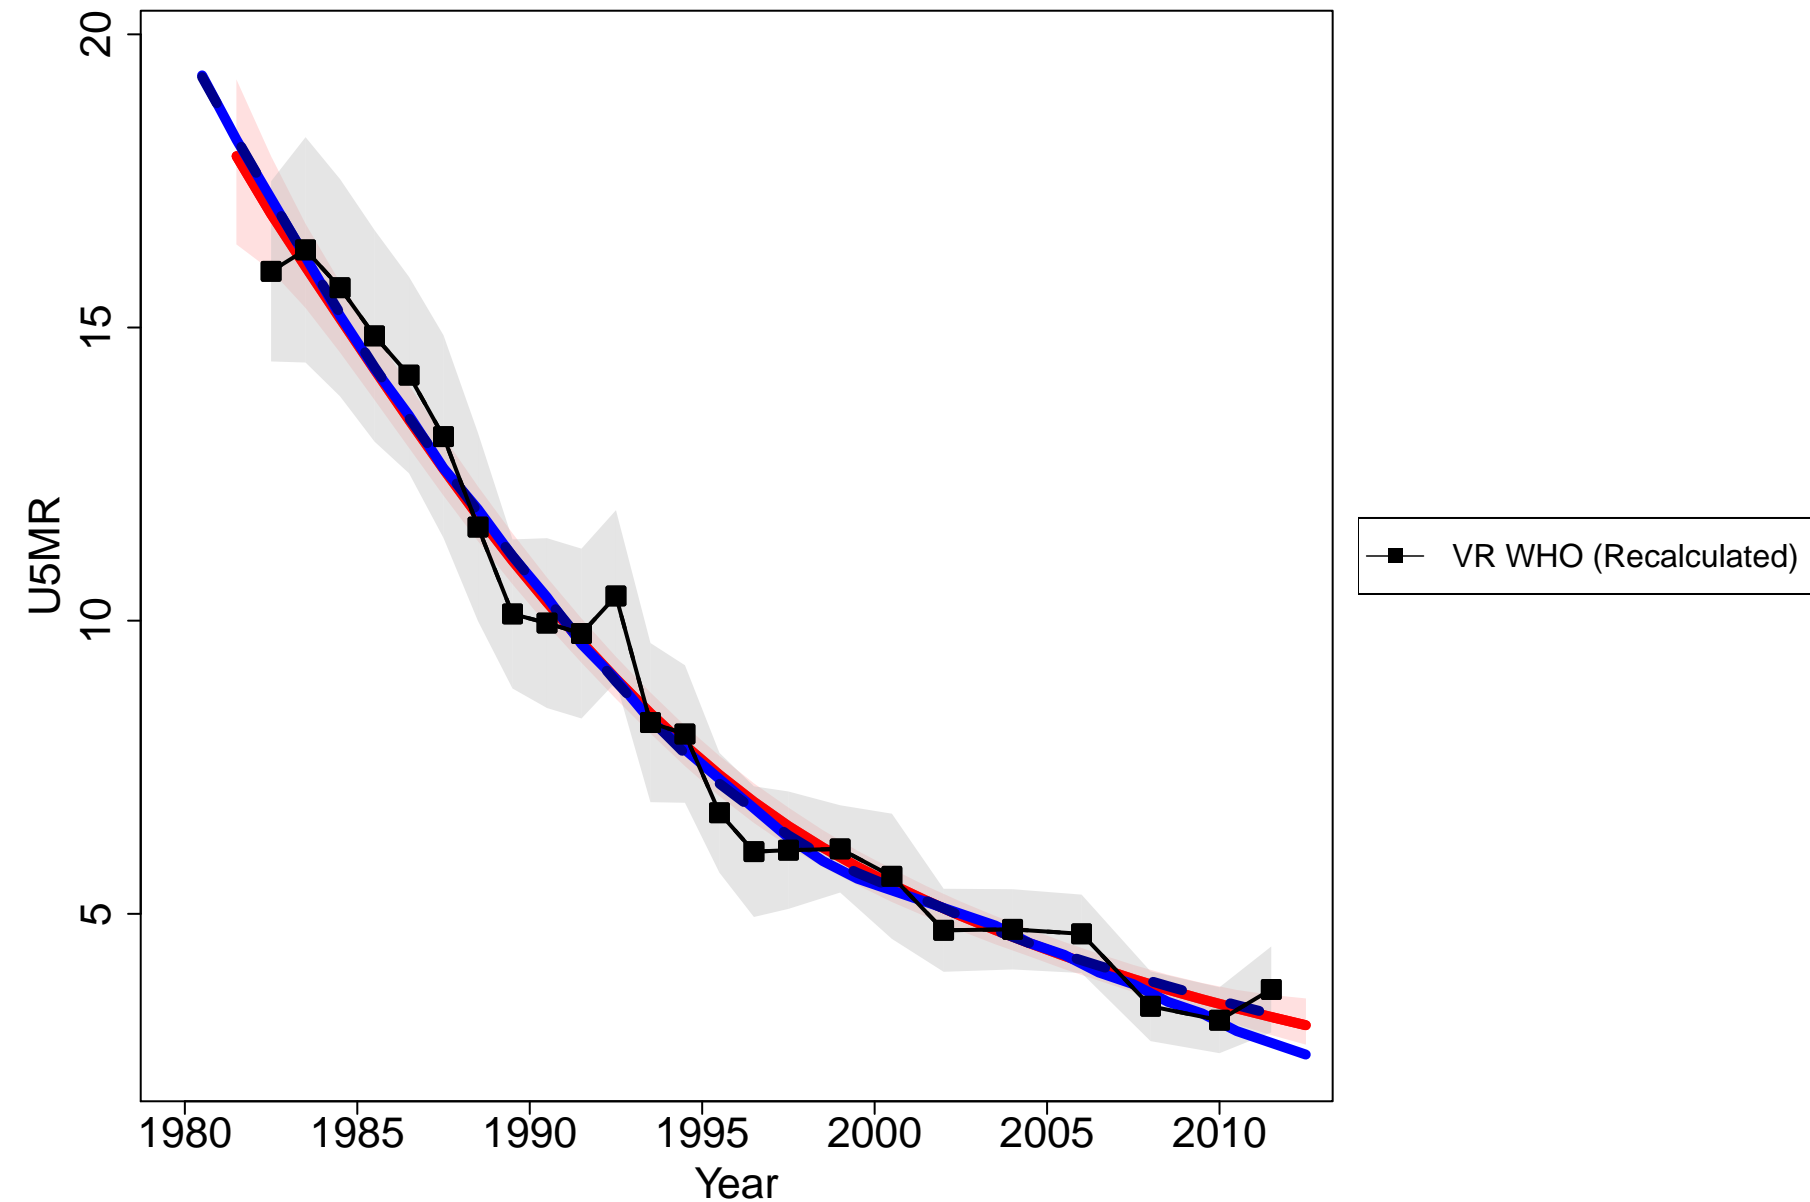

# Spain

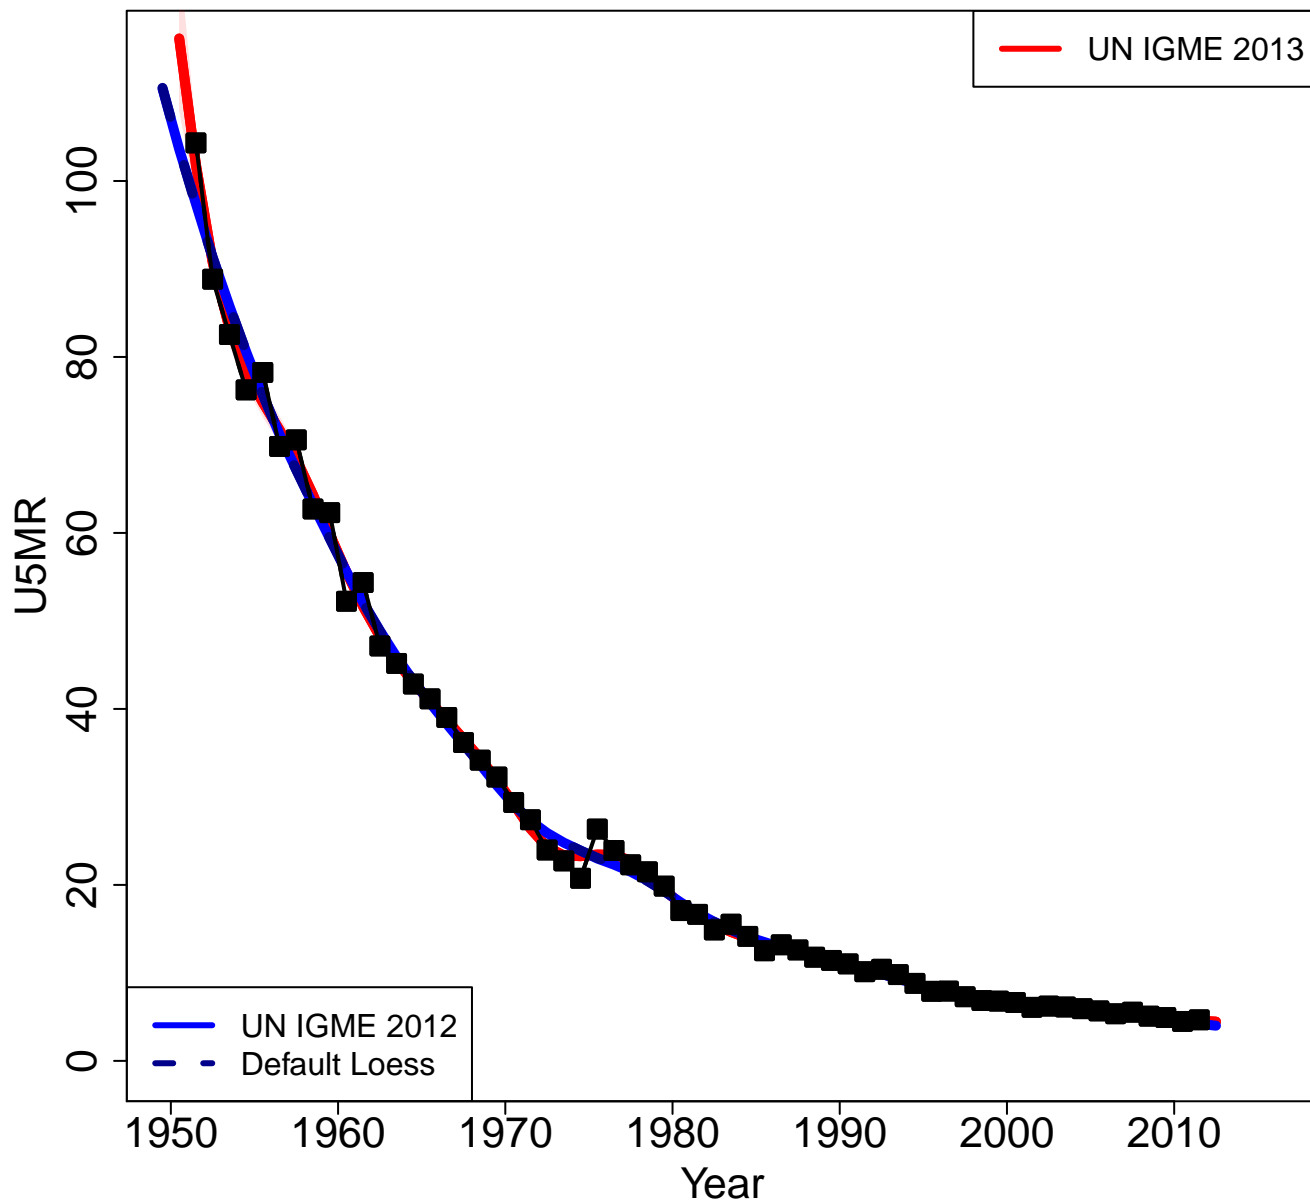

# Zoomed in

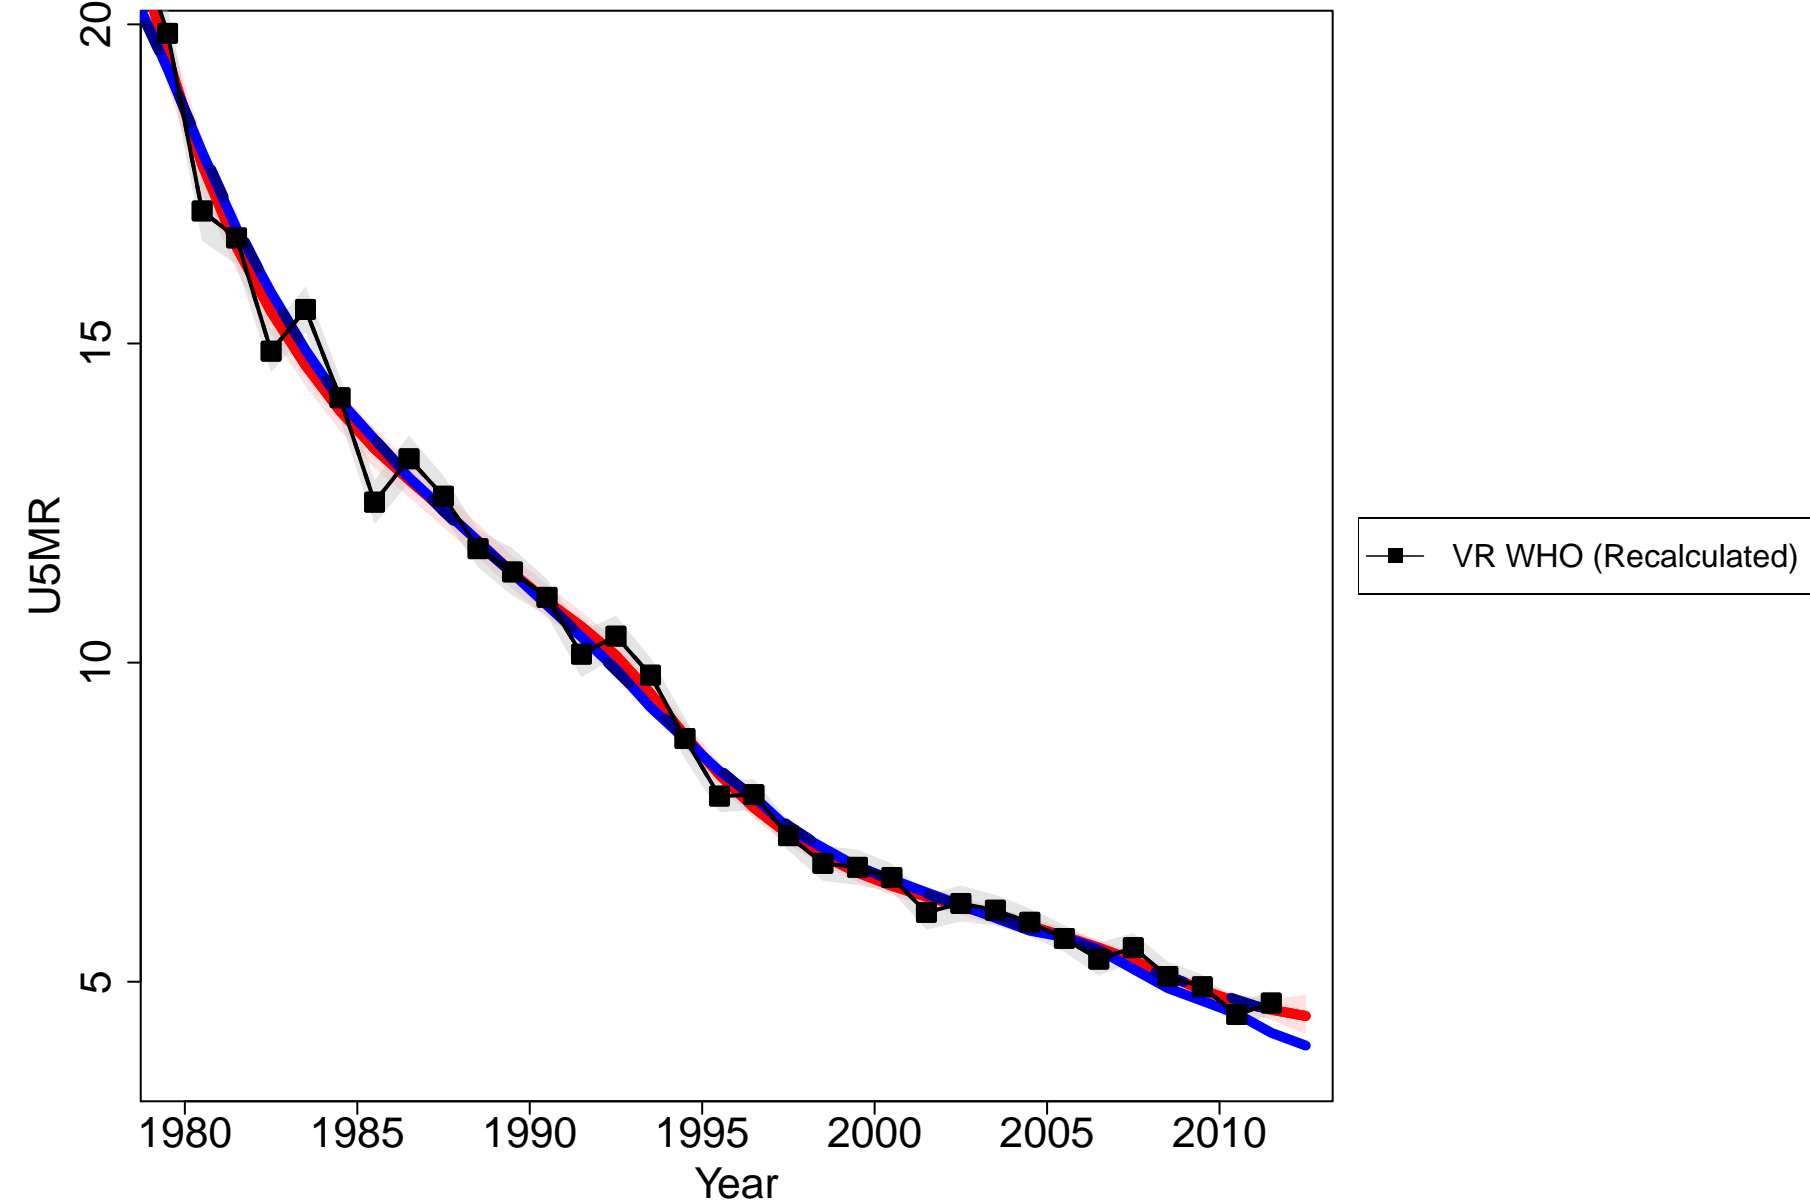

# Sweden

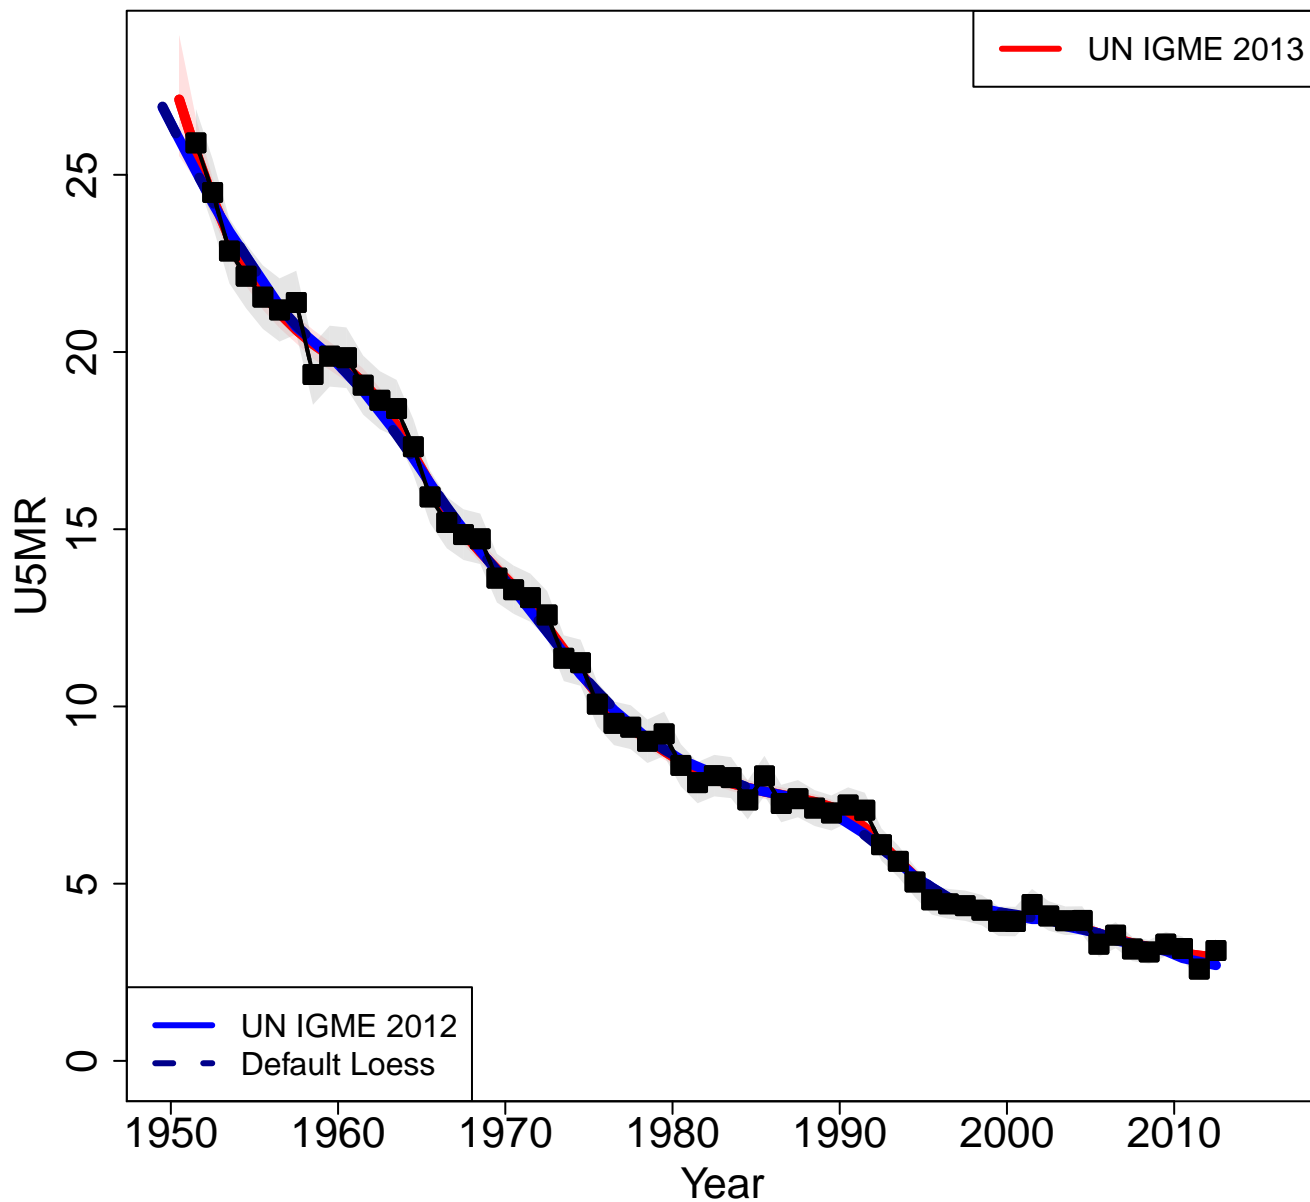

# Zoomed in

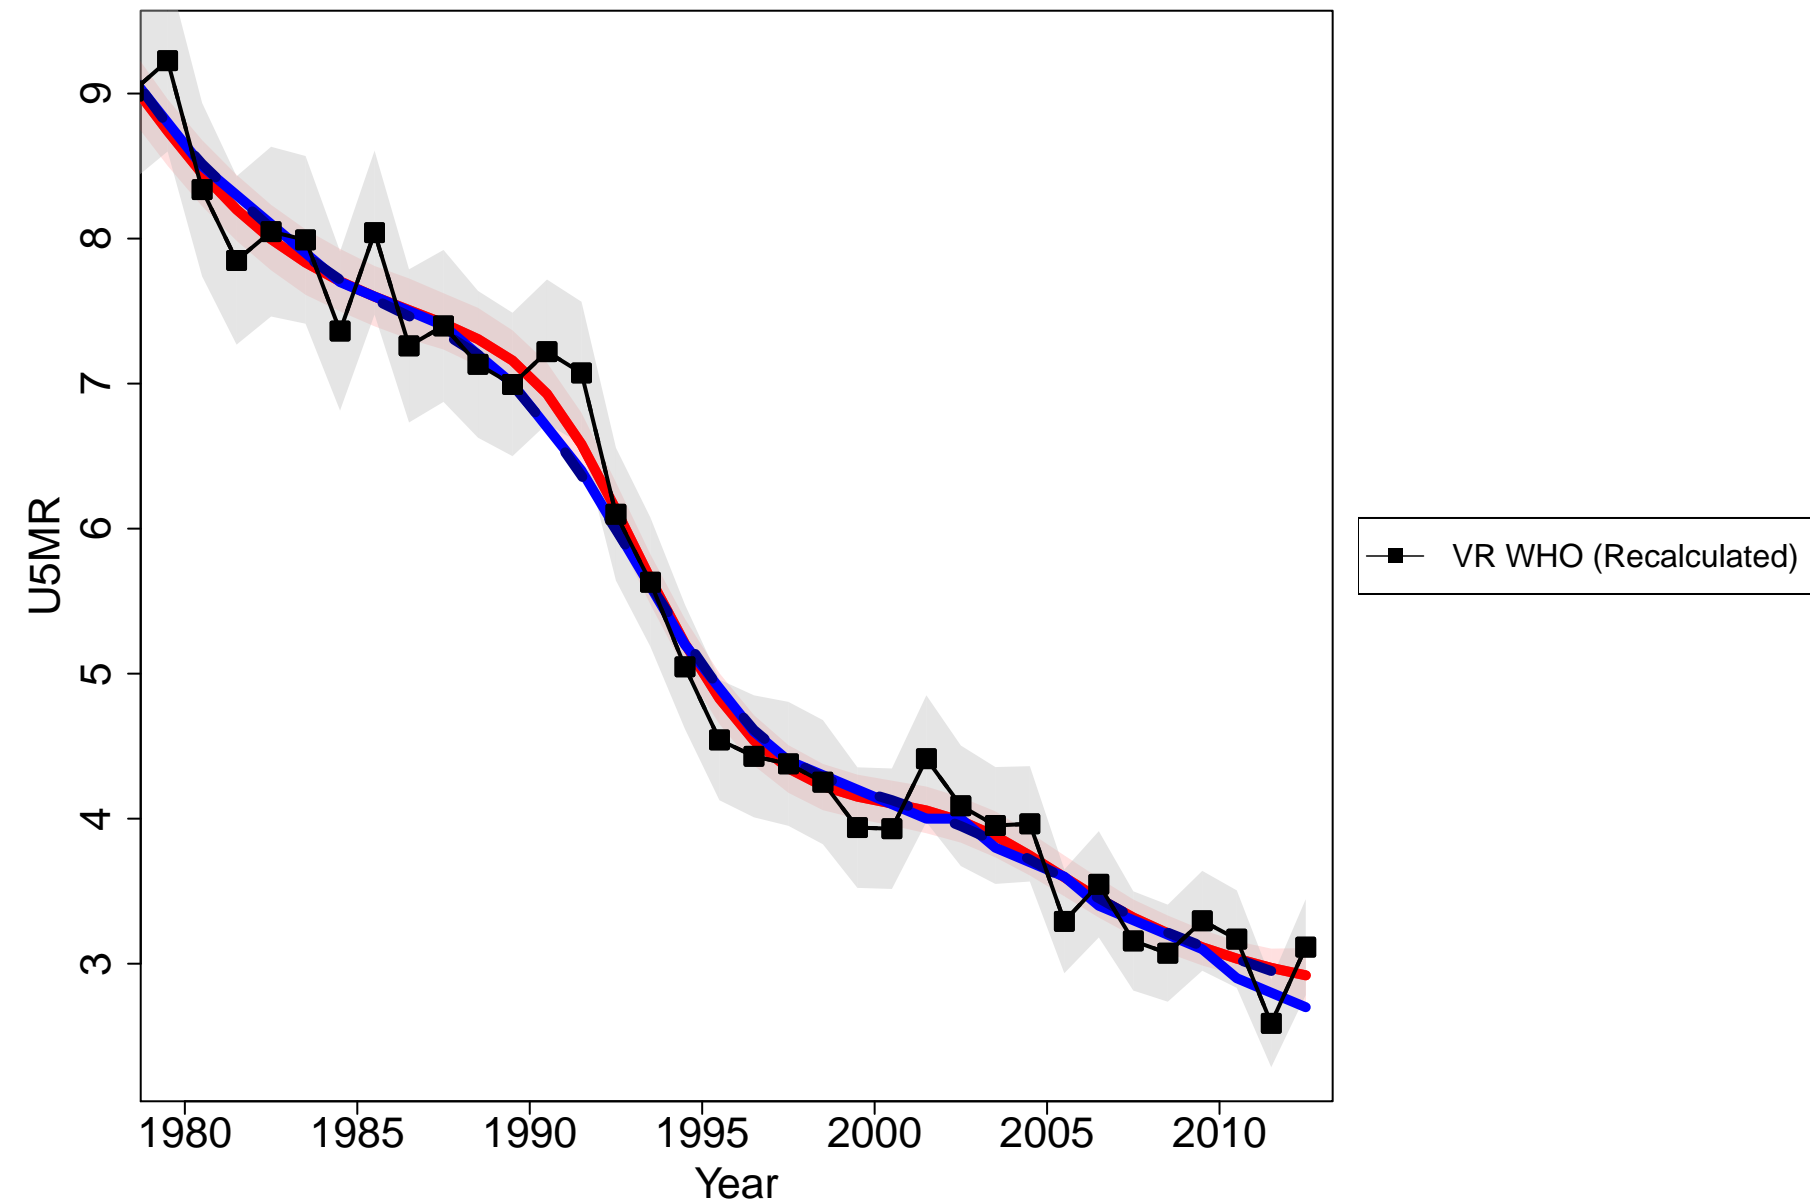



# Switzerland

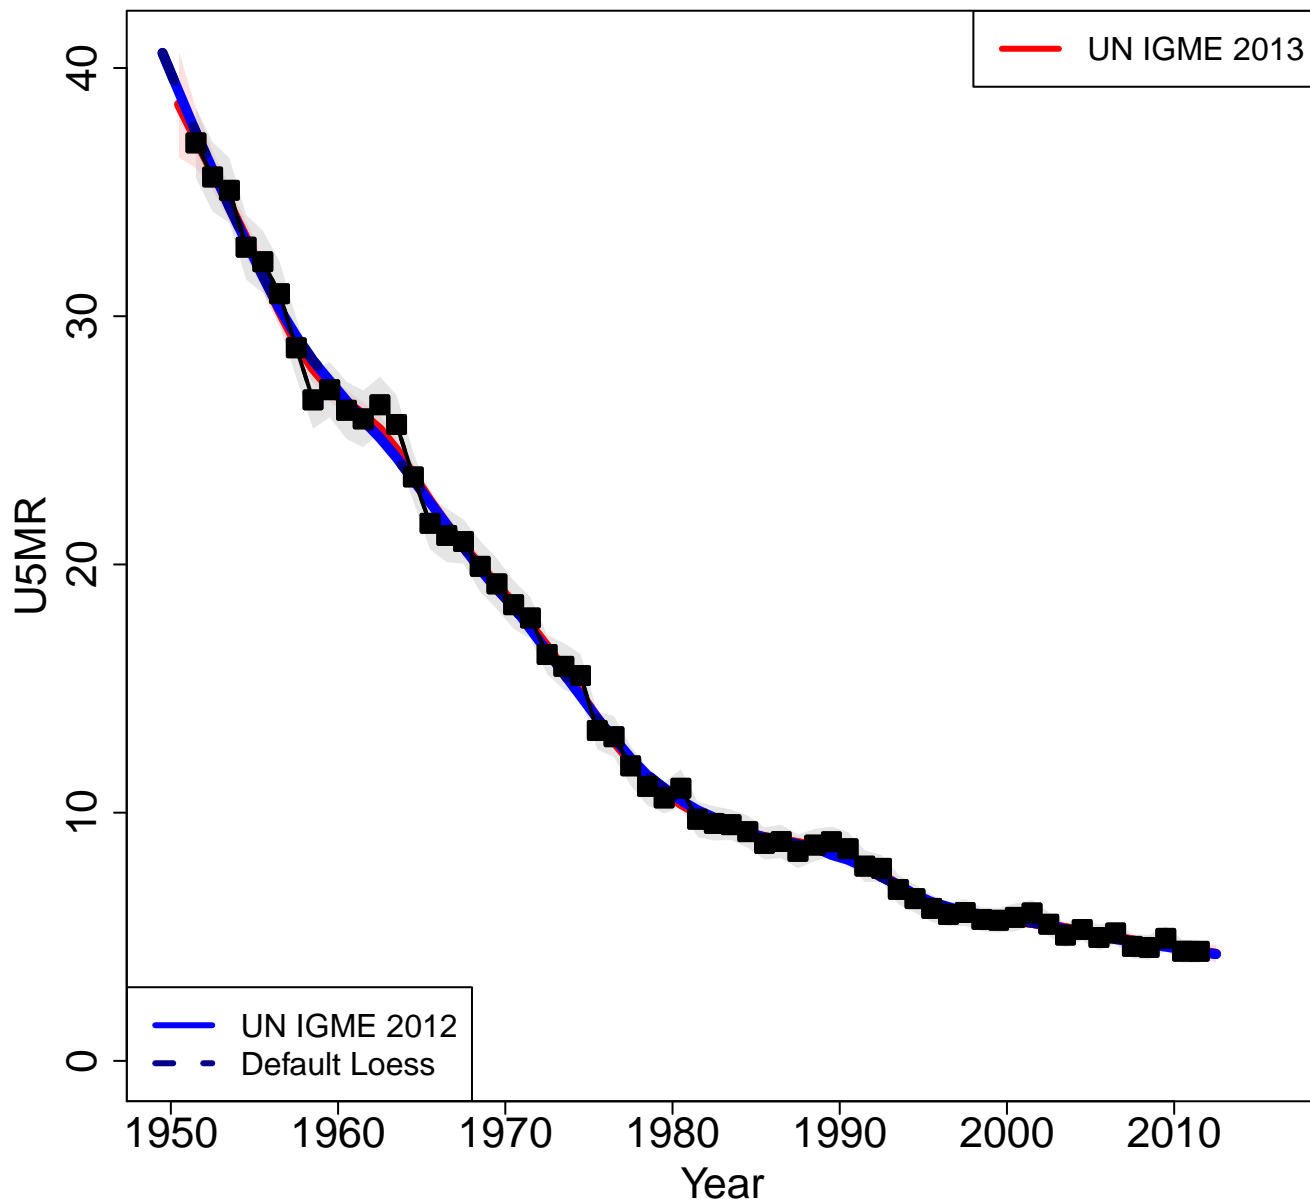

# Zoomed in

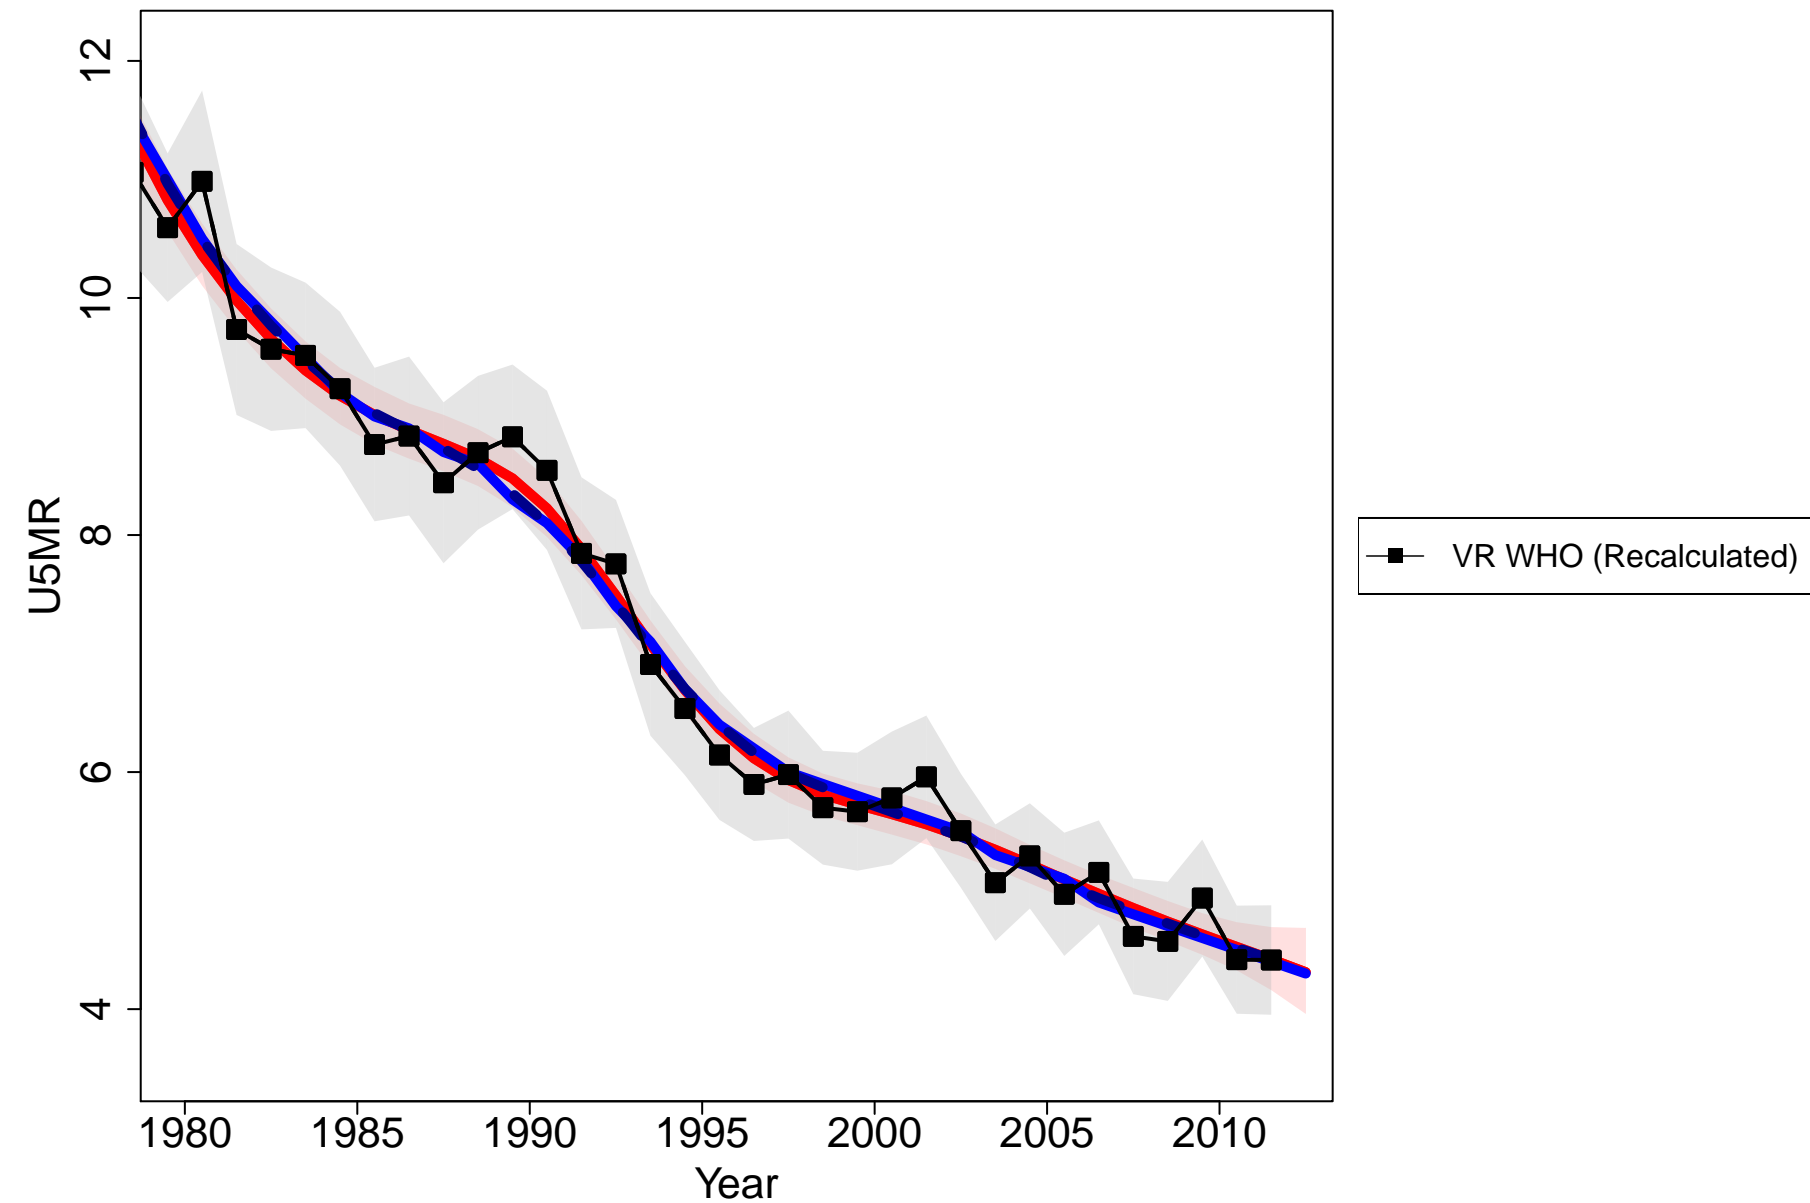

# United Kingdom

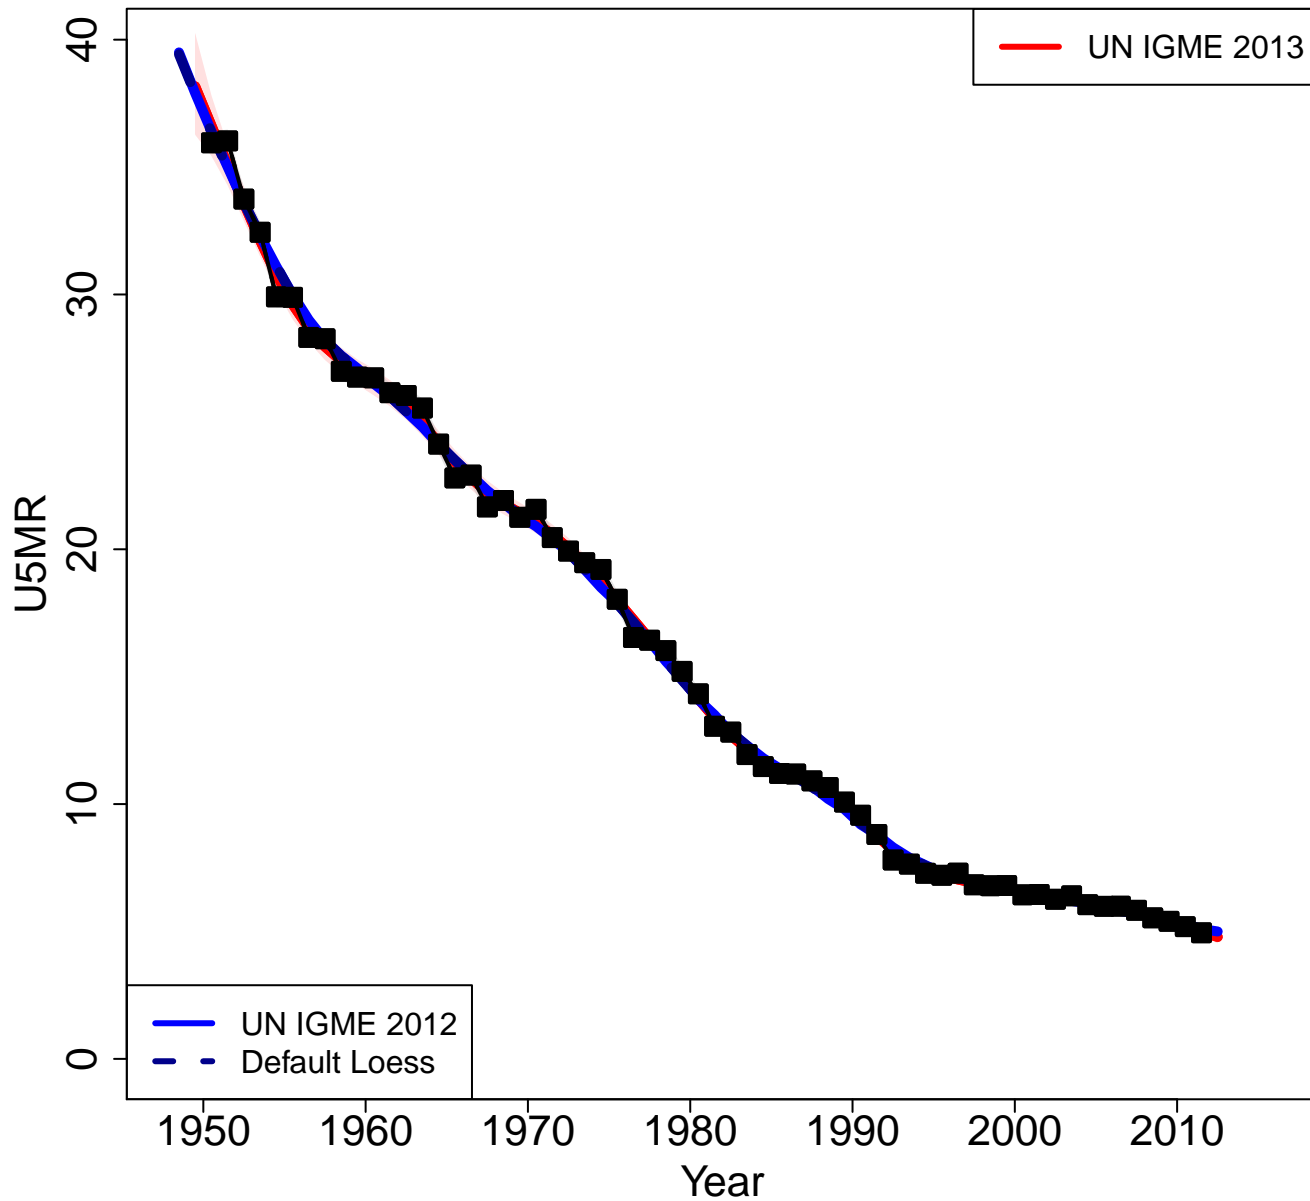

# Zoomed in

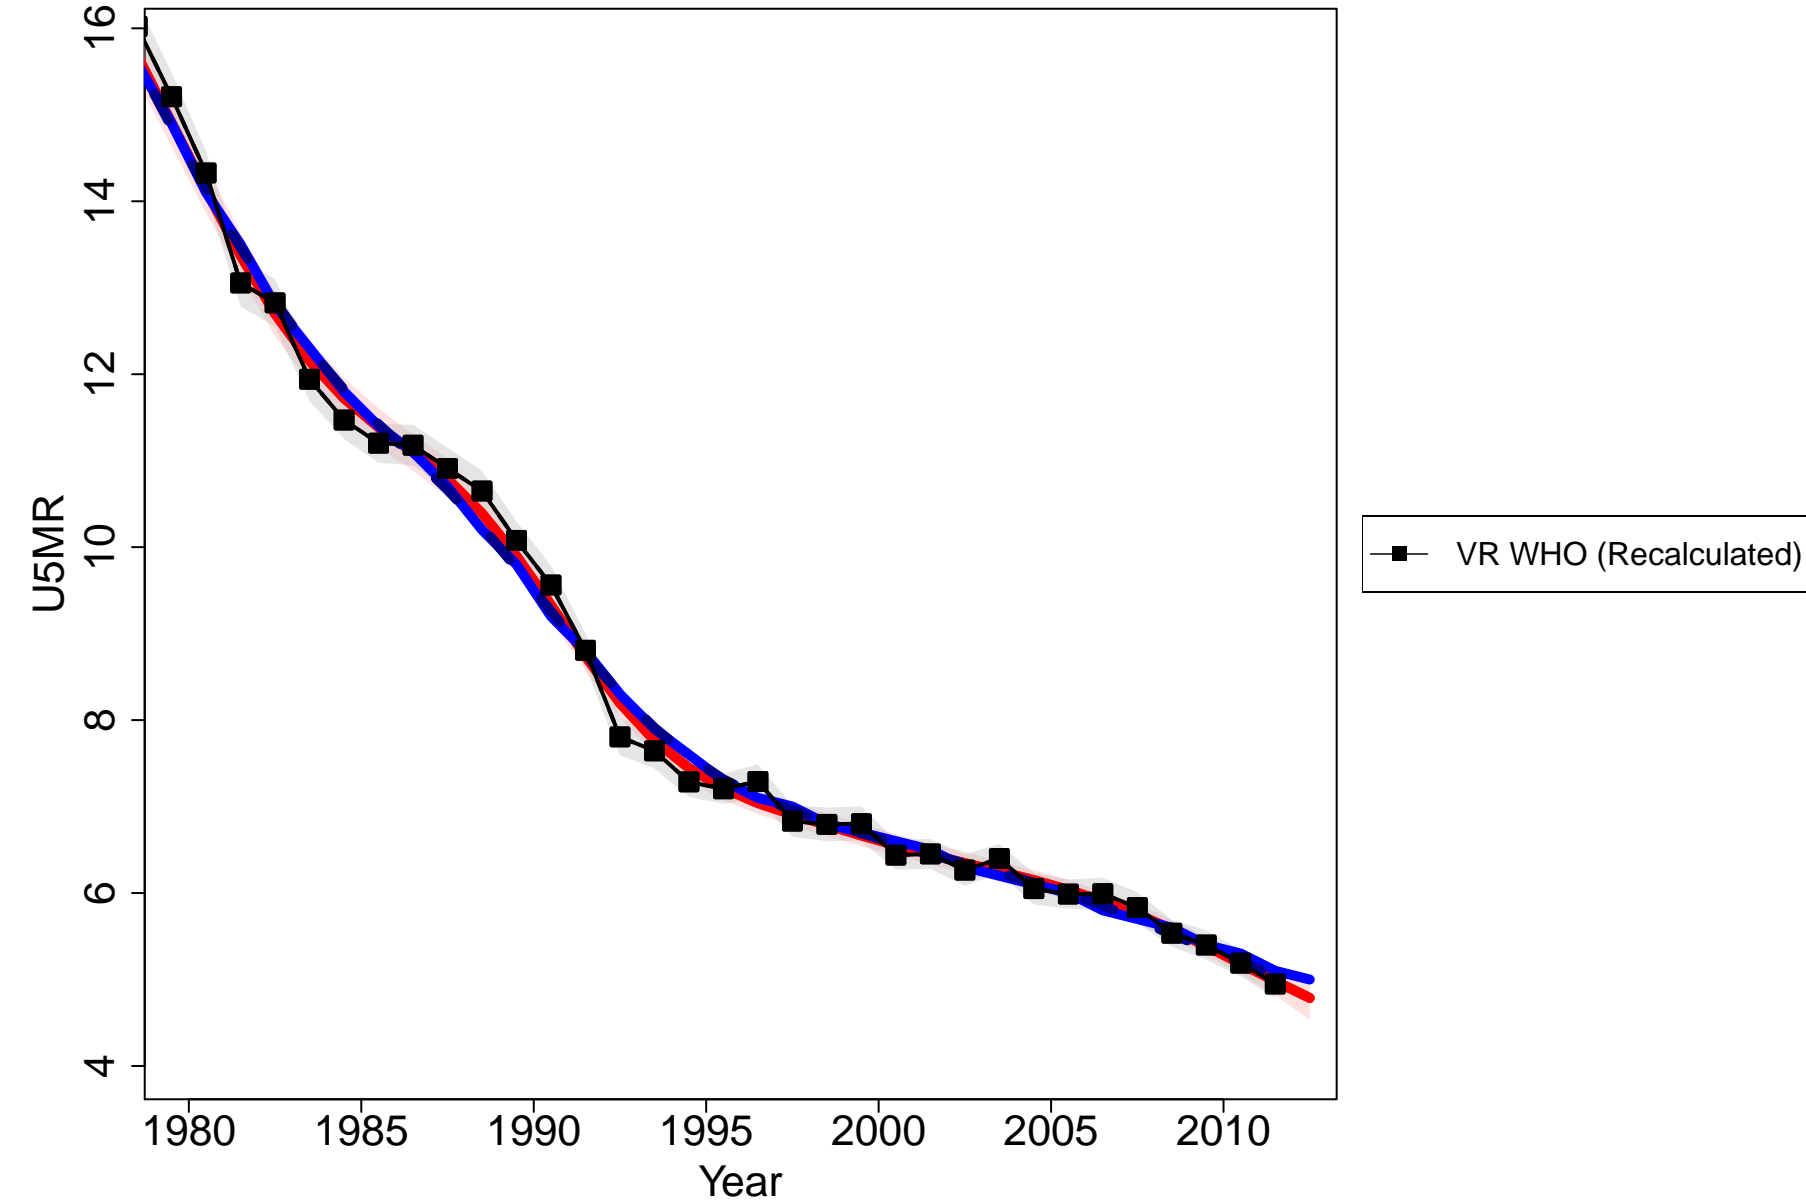

# United States of America

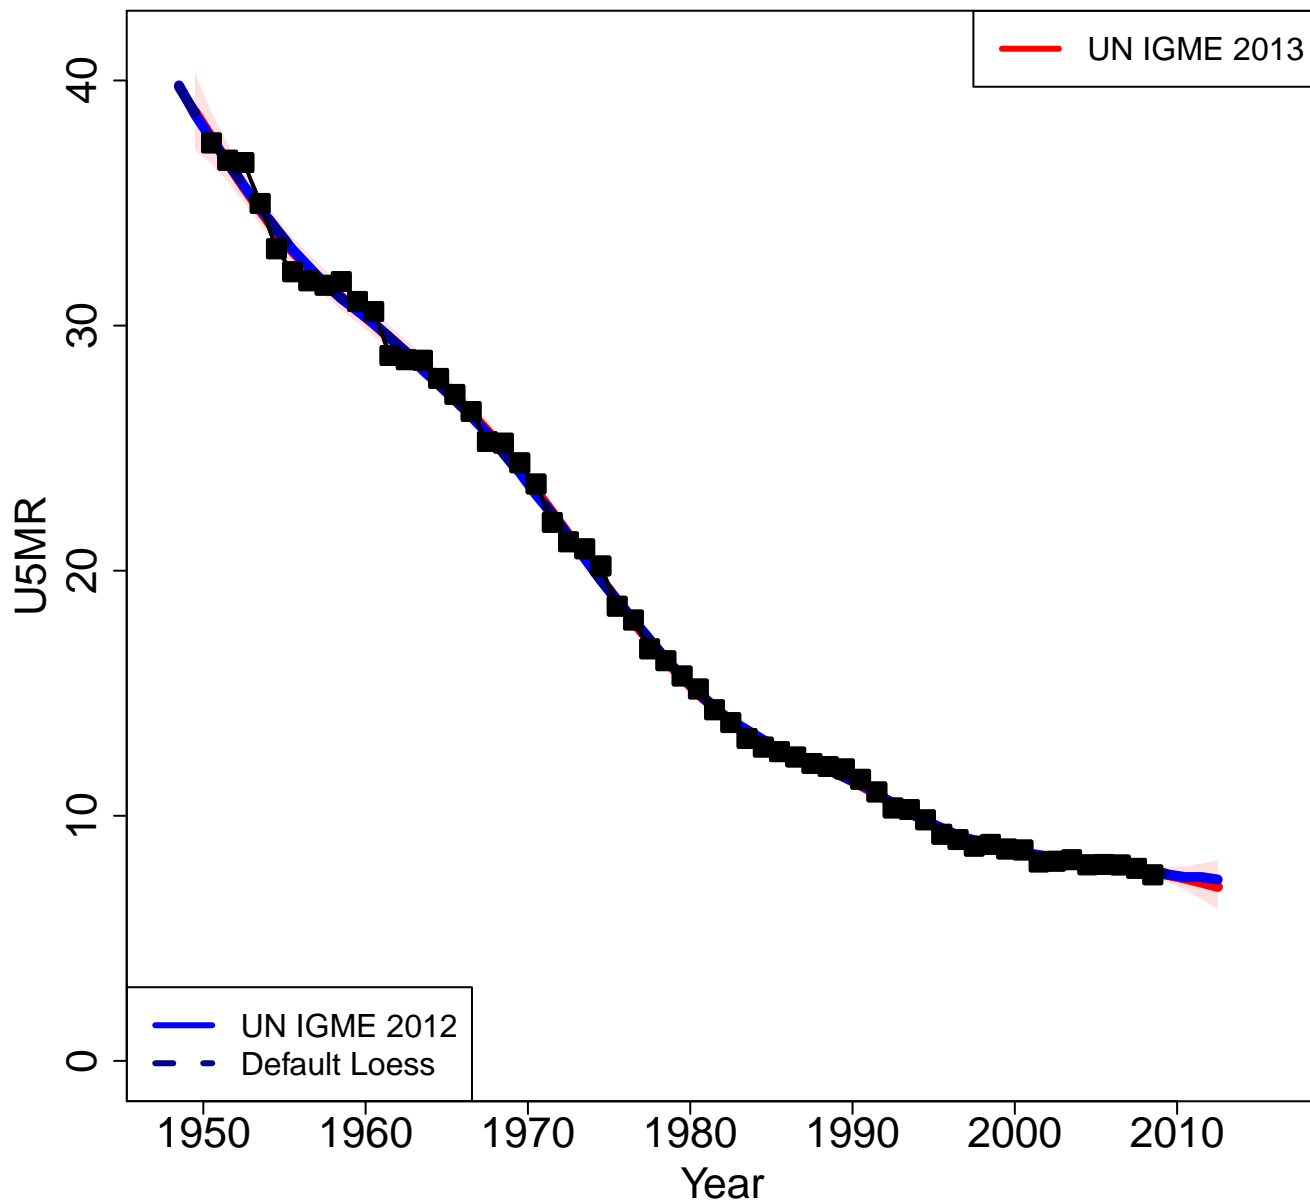

# Zoomed in

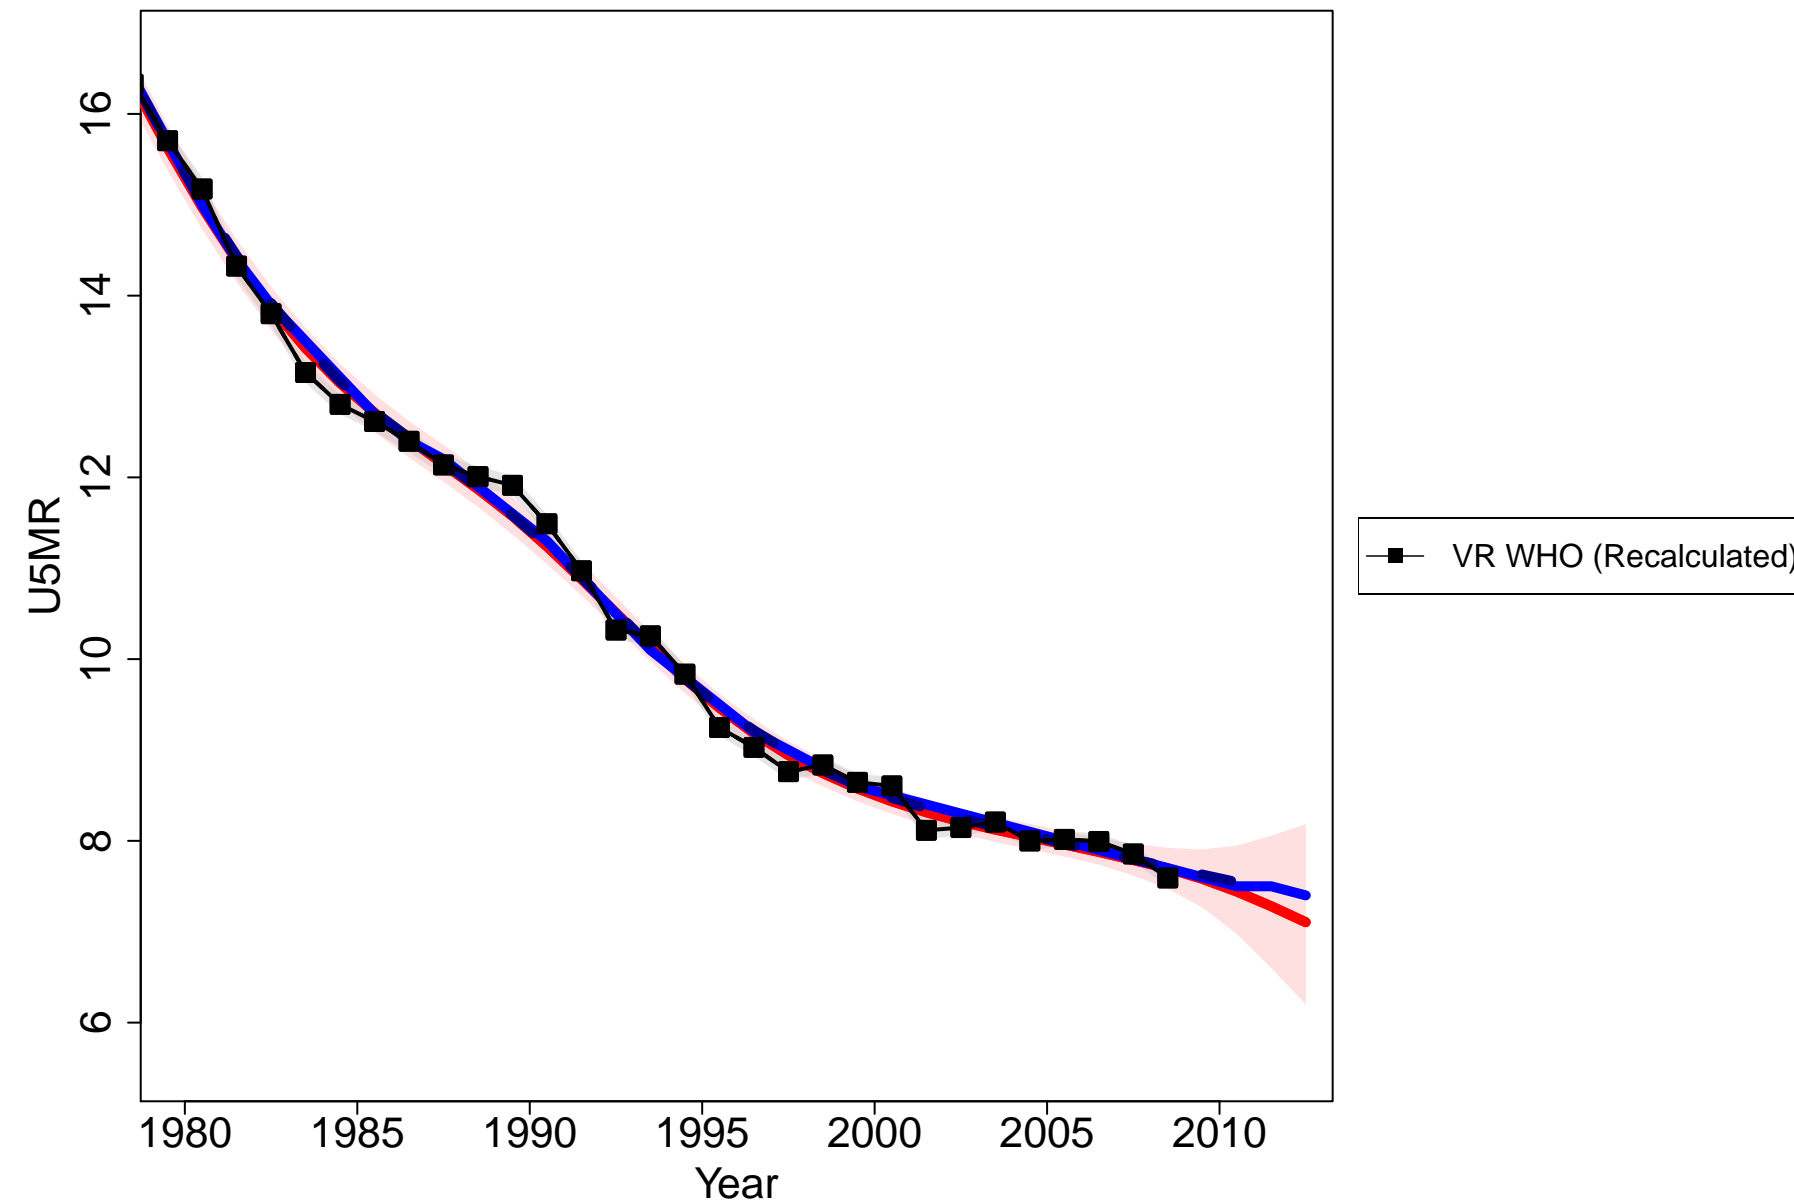

# Botswana

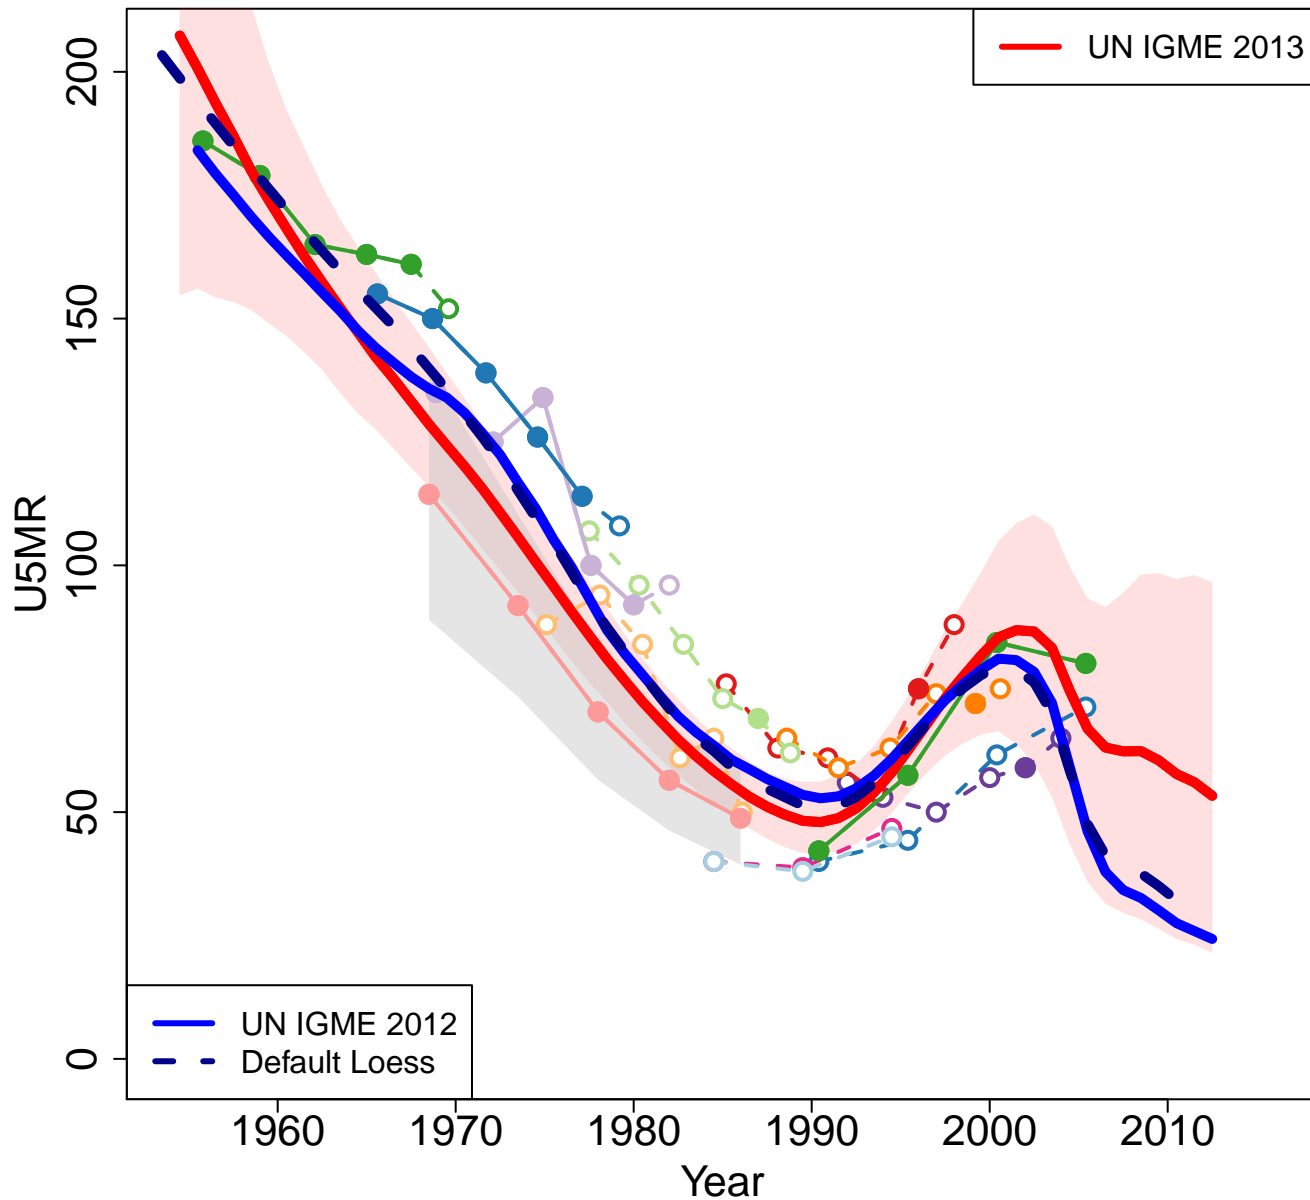

# Zoomed in

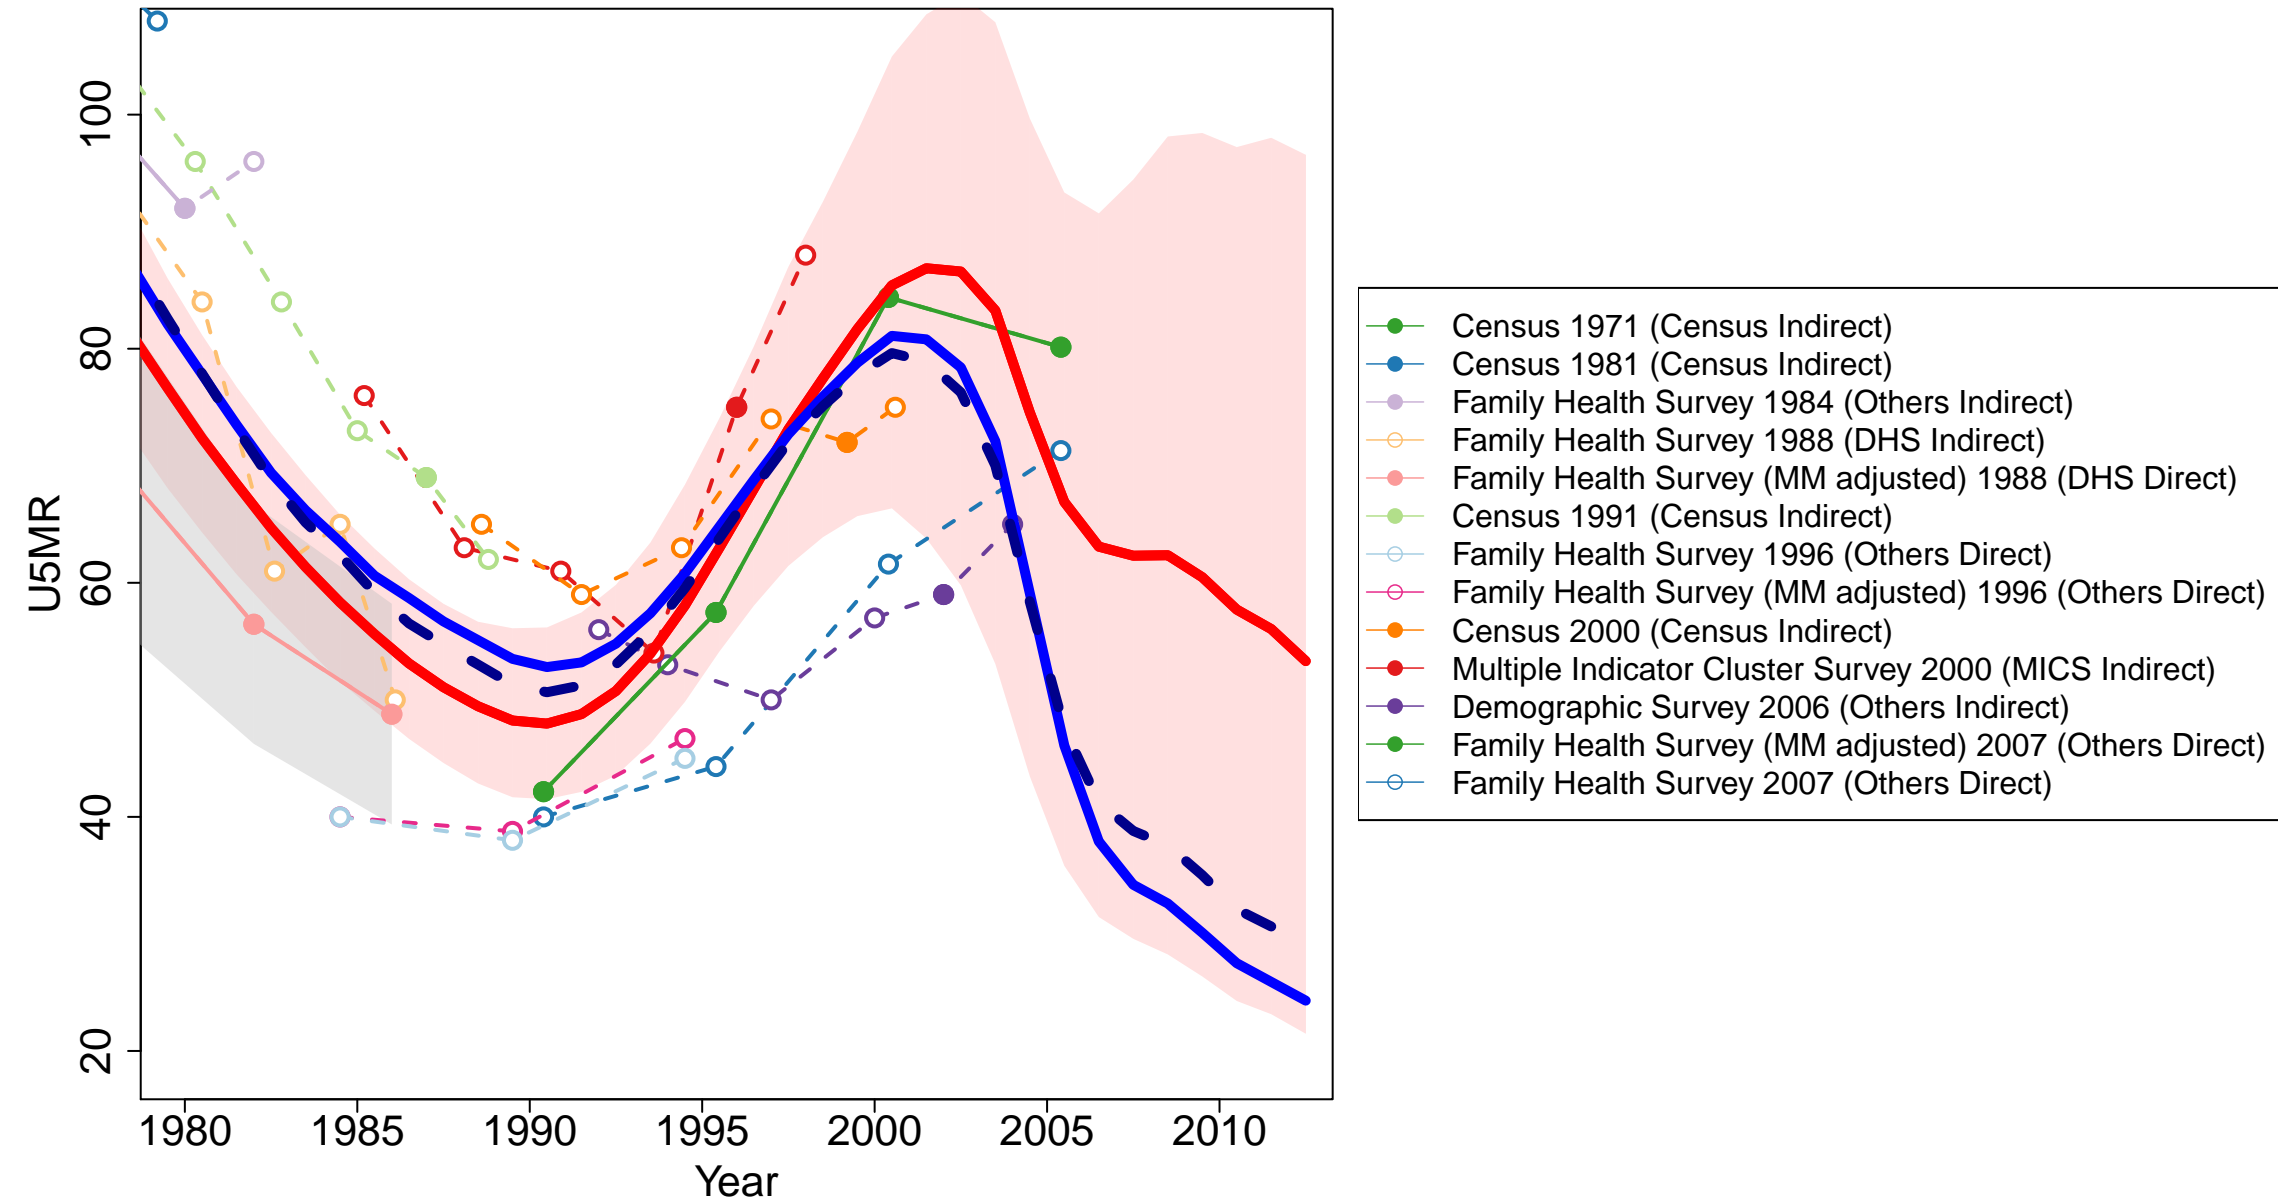

# Cameroon

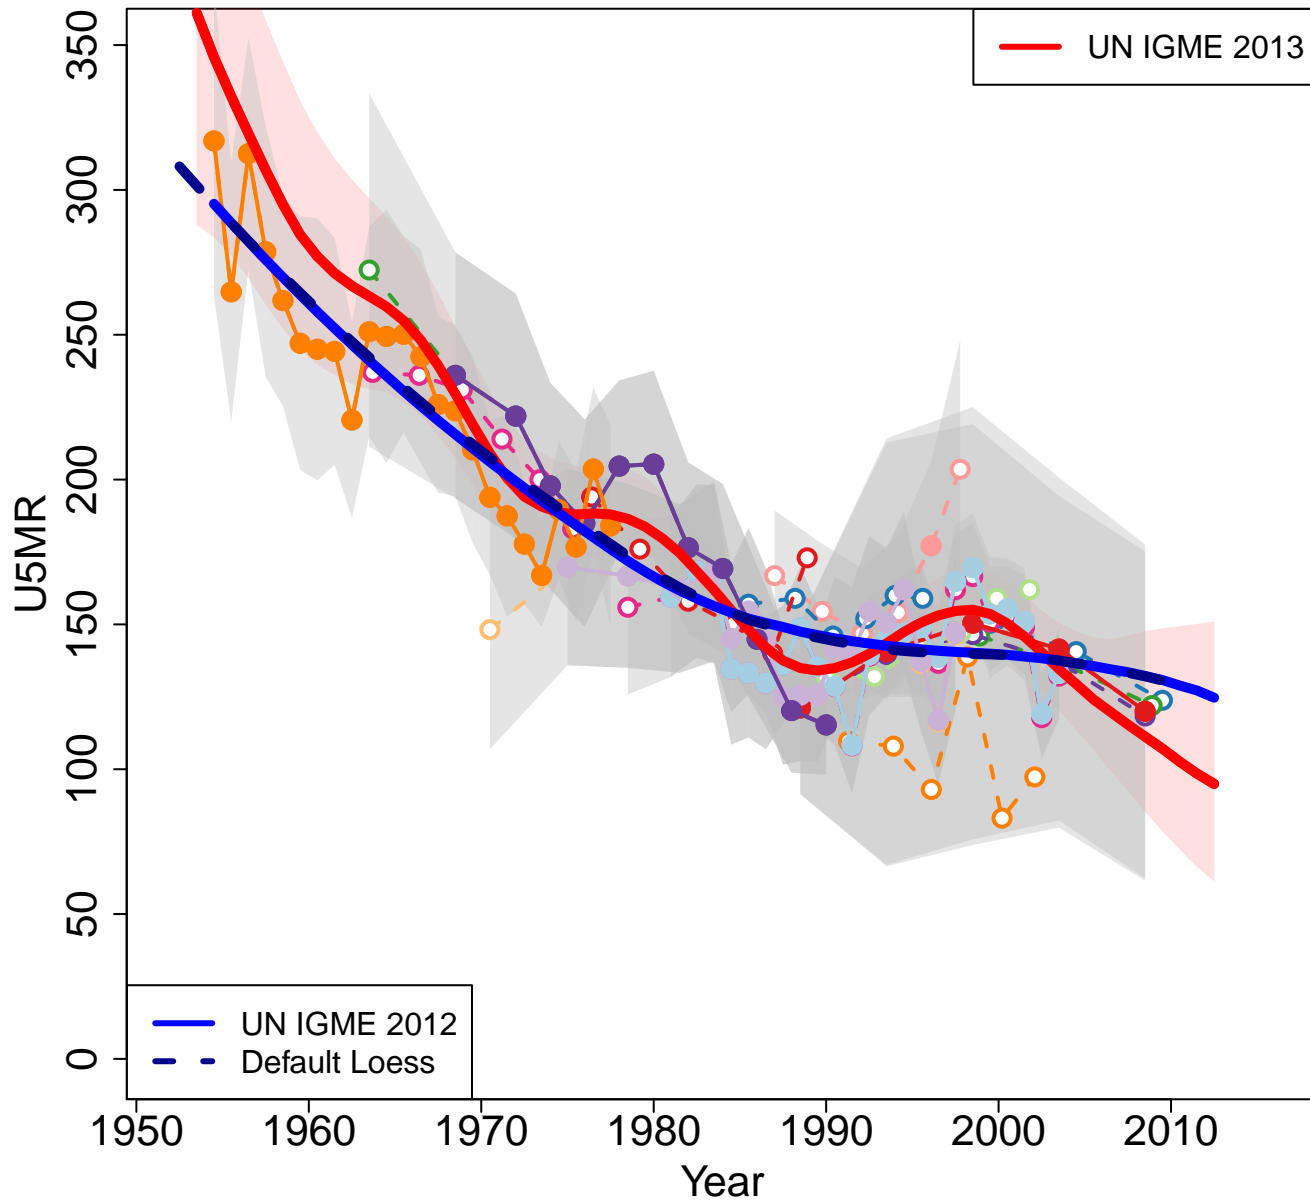

# Zoomed in

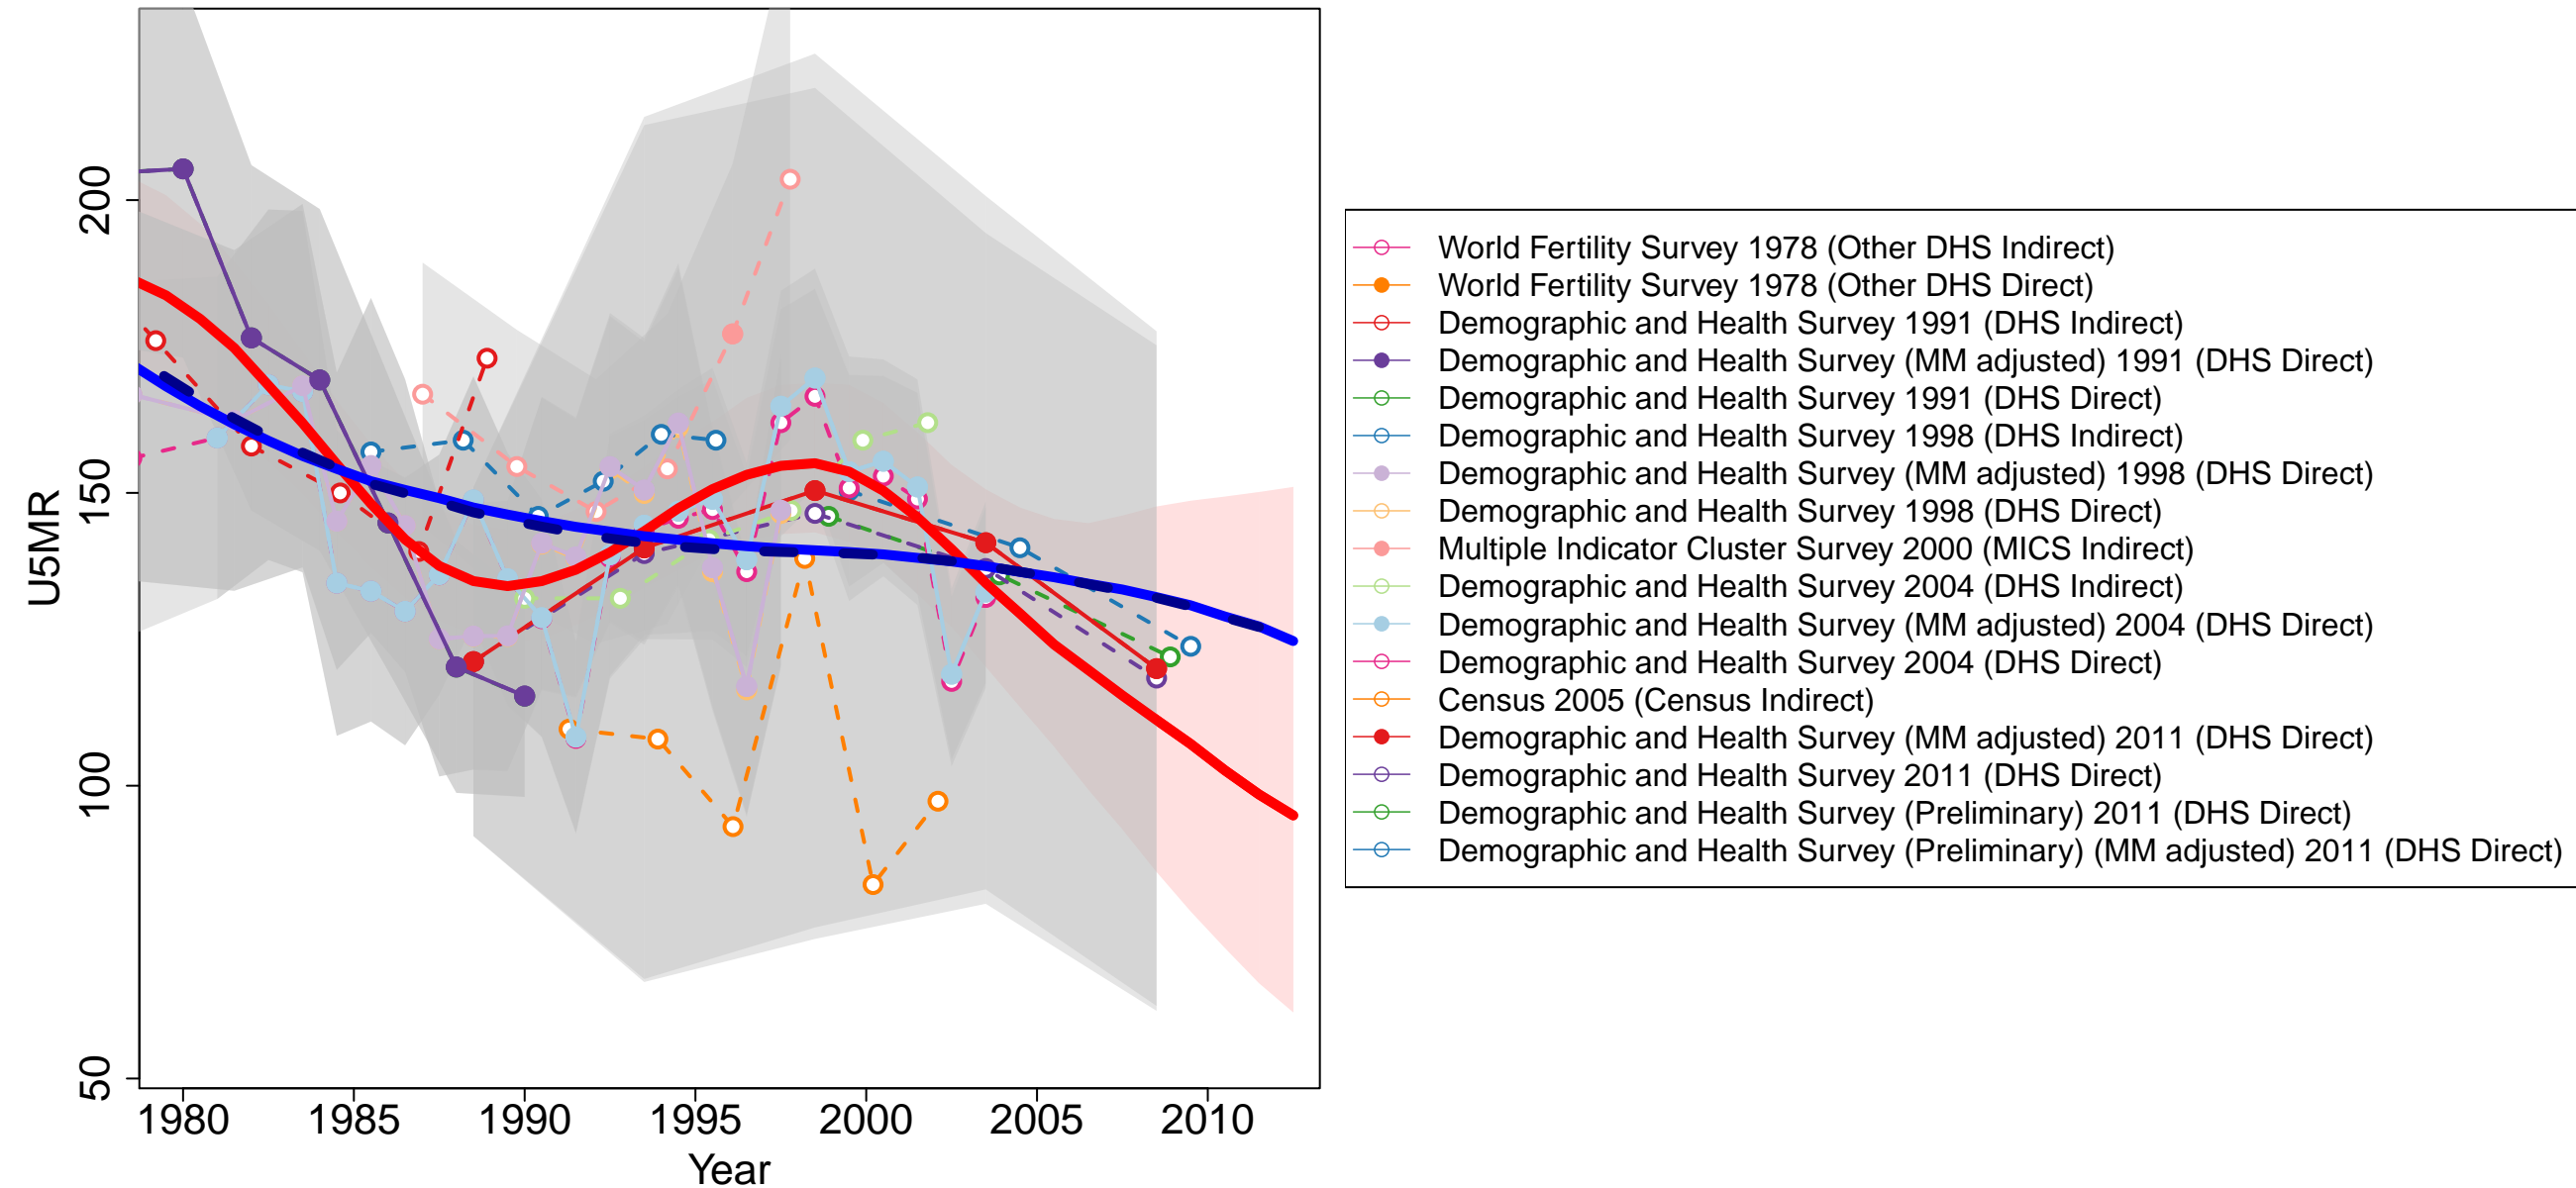

# Central African Republic

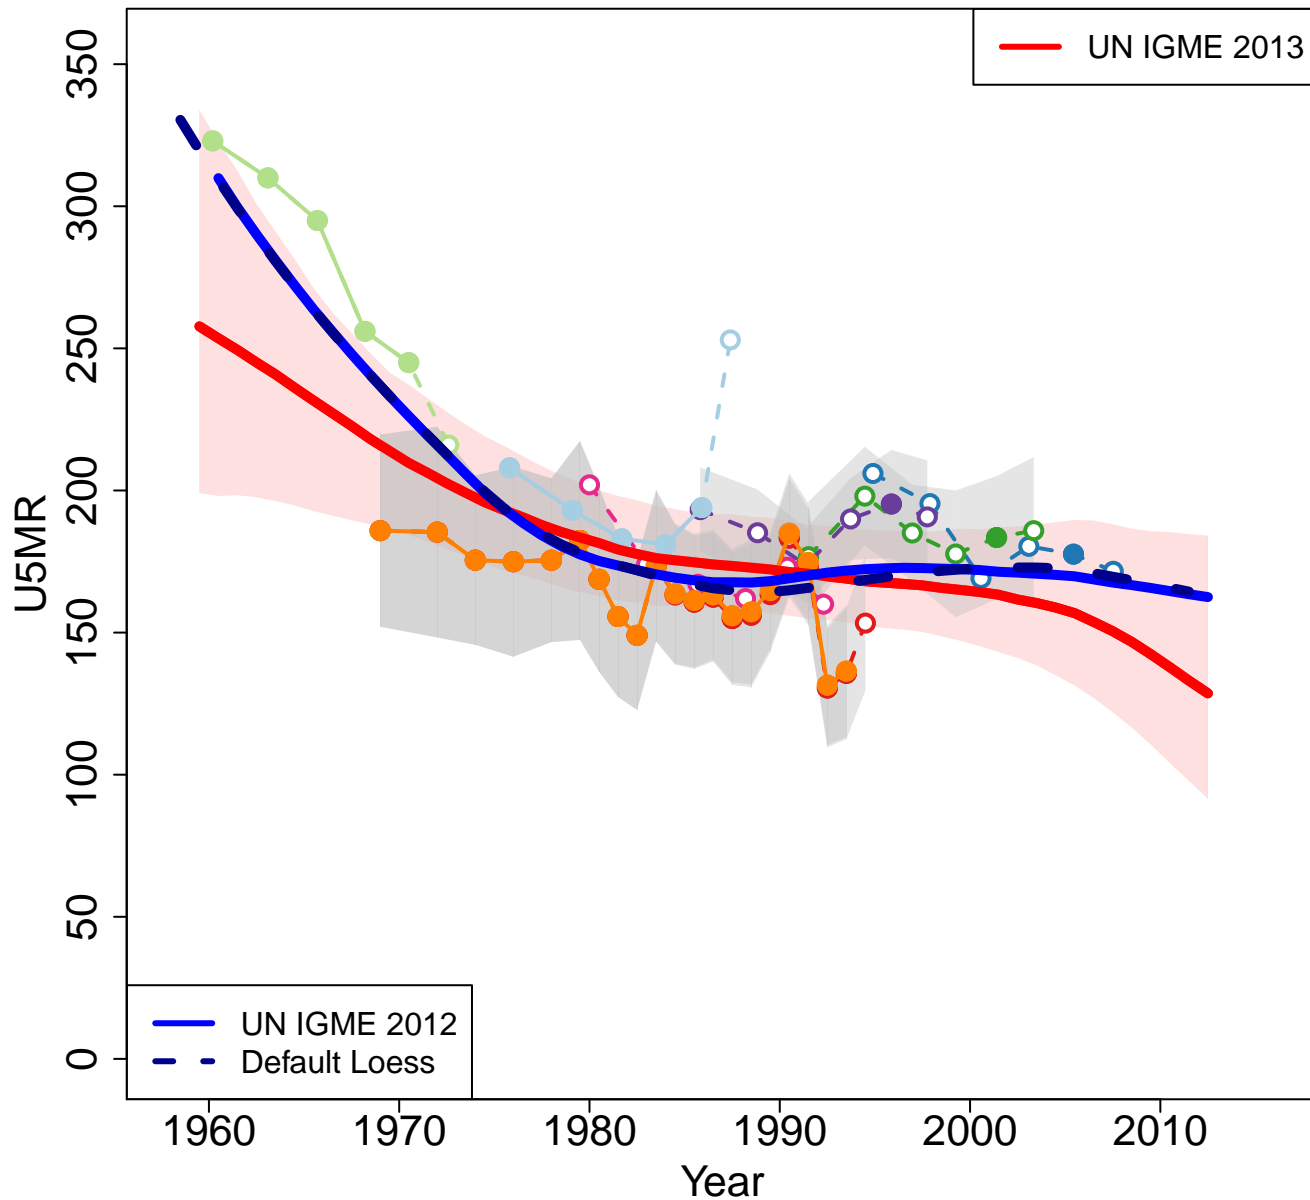

# Zoomed in

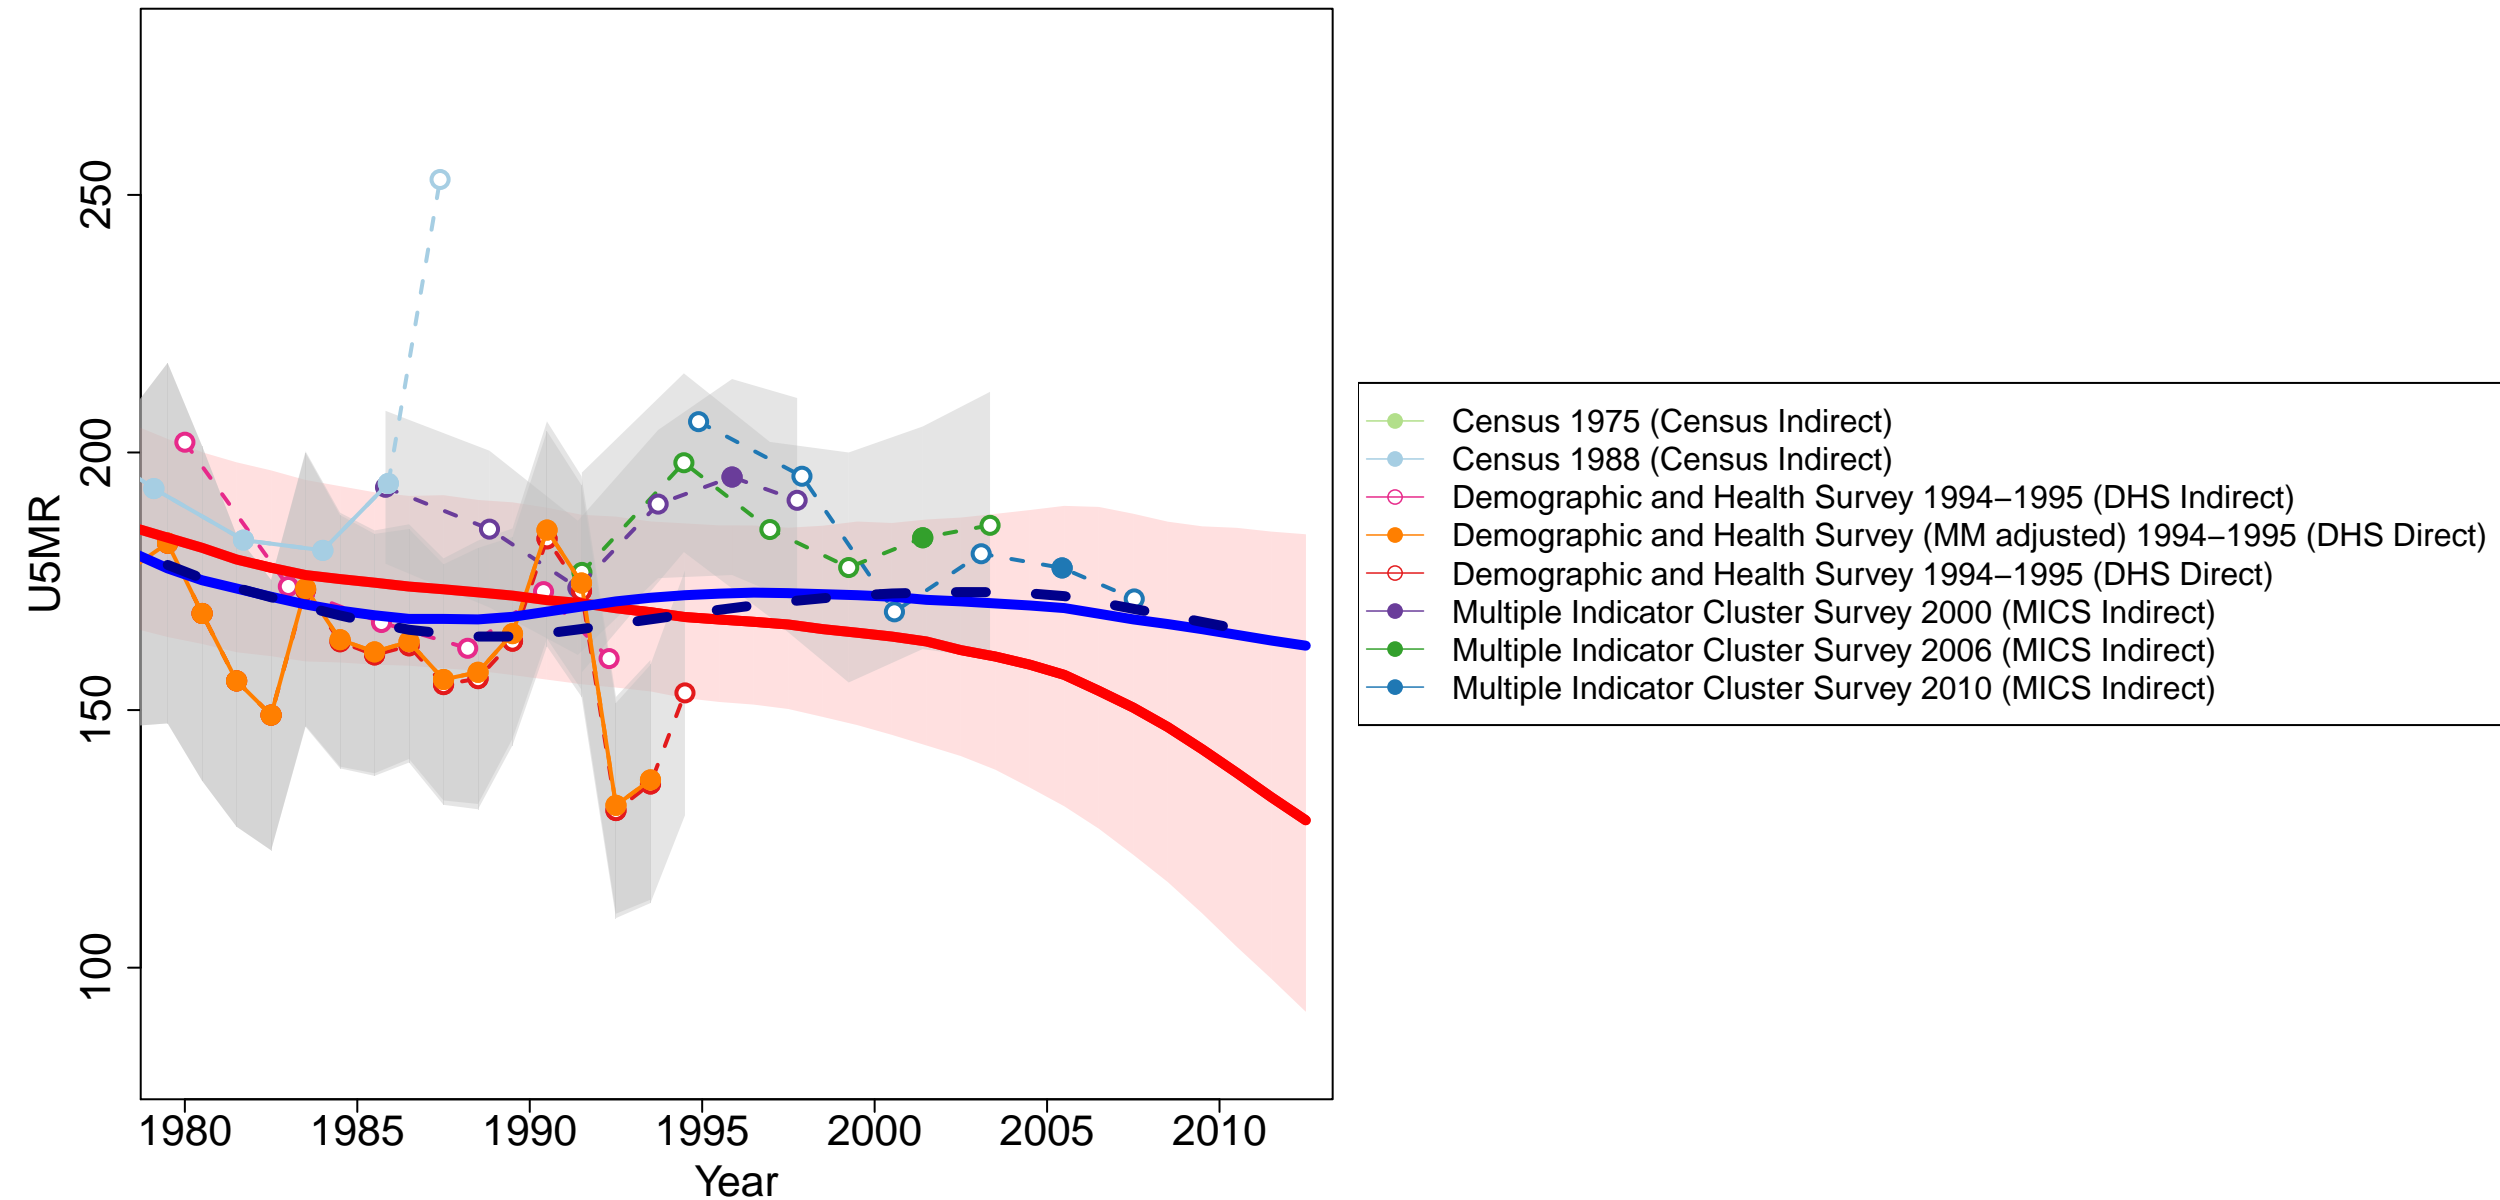

# Cote d Ivoire

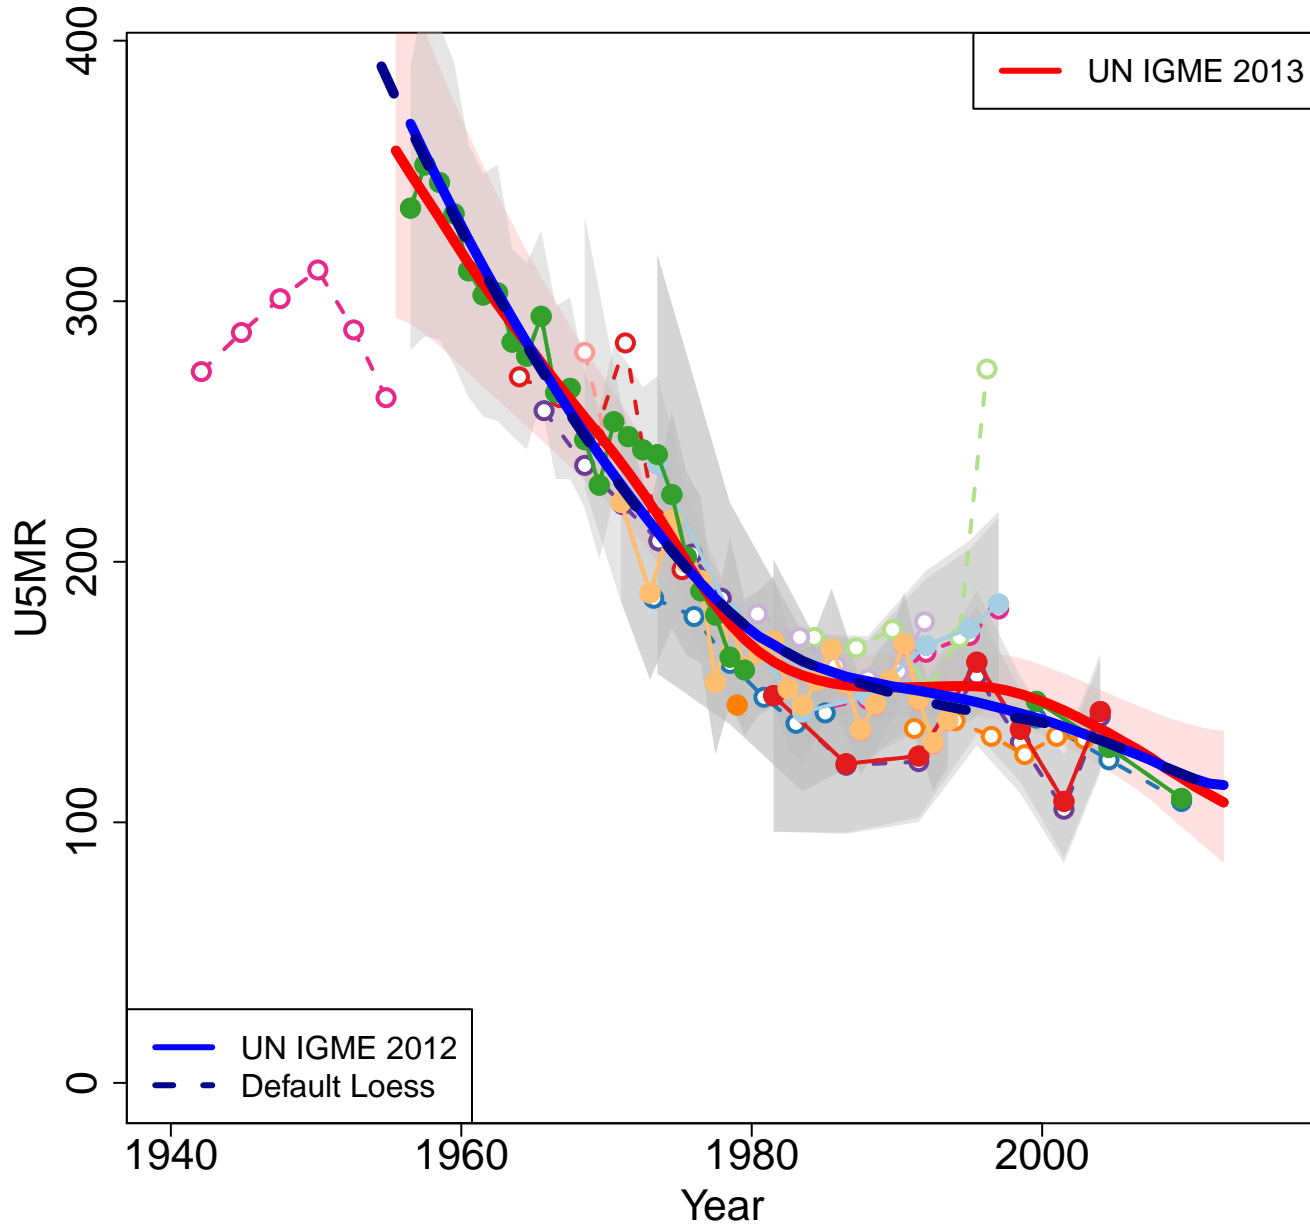

# Zoomed in

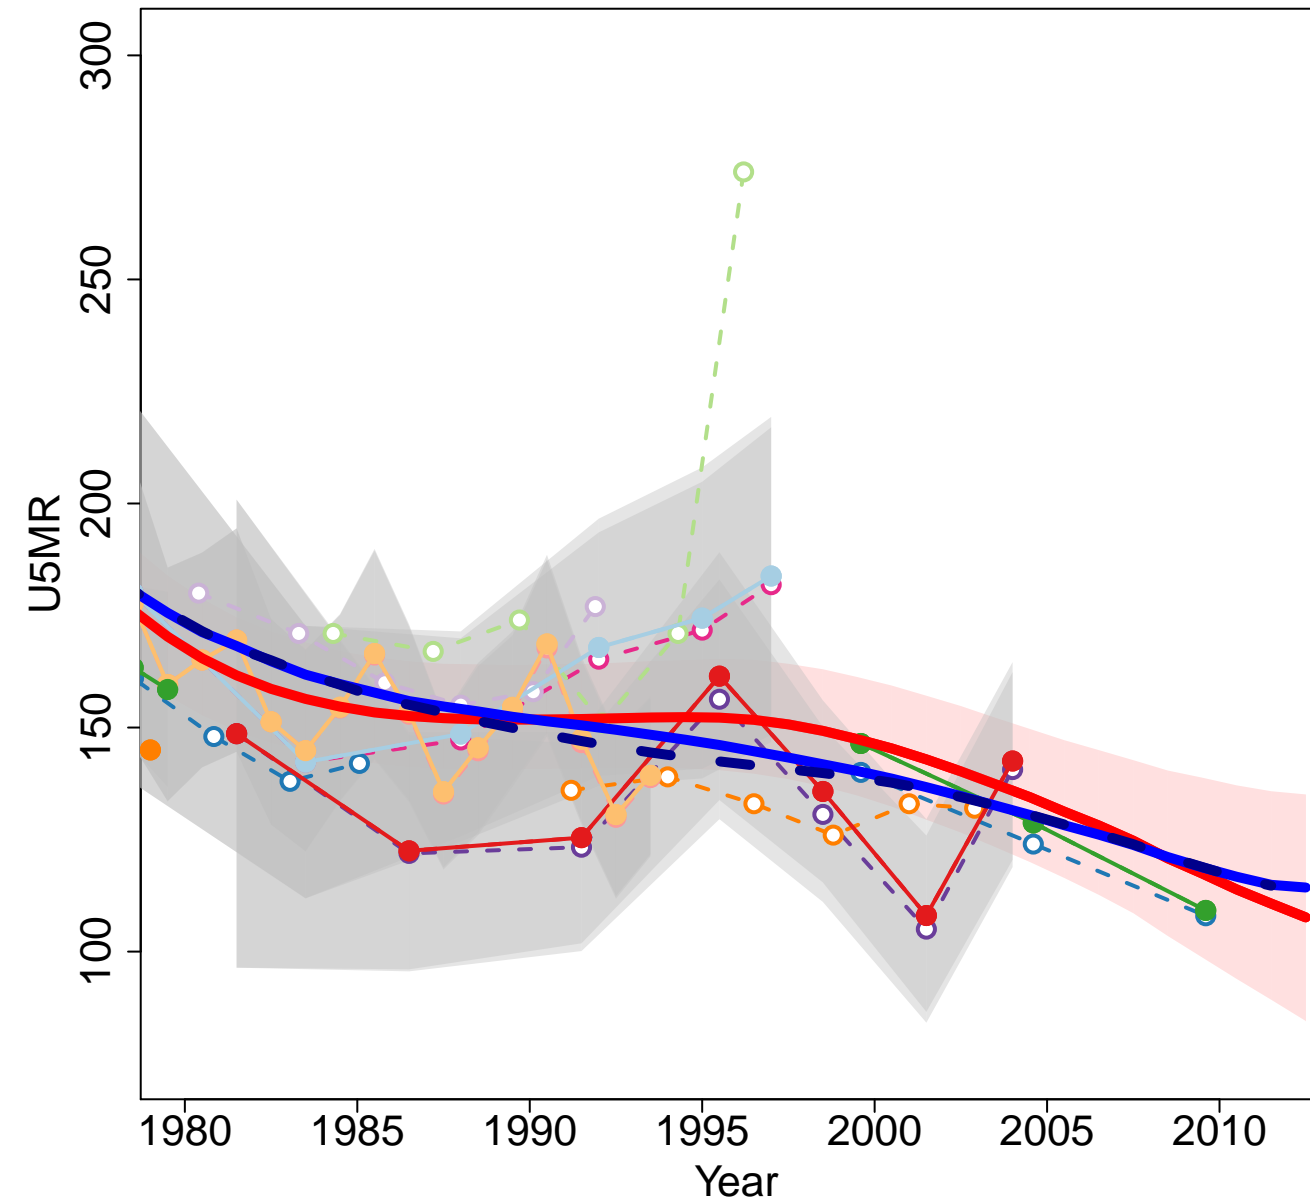

- Survey 1957–1958 (Others Indirect)
- Demographic Survey Repeated Passages 1978 (Others Direct)
- Demographic Survey Repeated Passages 1978 (Others Indirect)
- World Fertility Survey 1980–1981 (Other DHS Indirect)
- World Fertility Survey 1980–1981 (Other DHS Direct)
- Census 1988 (Census Indirect)
- Demographic and Health Survey 1994 (DHS Indirect)
- Demographic and Health Survey (MM adjusted) 1994 (DHS Direct)
- Demographic and Health Survey 1994 (DHS Direct)
- Demographic and Health Survey 1998–1999 (DHS Indirect)
- Demographic and Health Survey (MM adjusted) 1998–1999 (DHS Direct)
- Demographic and Health Survey 1998–1999 (DHS Direct)
- AIDS Indicator Survey 2005 (Other DHS Indirect)
- AIDS Indicator Survey (MM adjusted) 2005 (Other DHS Direct)
- AIDS Indicator Survey 2005 (Other DHS Direct)
- Demographic and Health Survey (Preliminary) (MM adjusted) 2011–2012 (DHS Direct)
- Demographic and Health Survey (Preliminary) 2011–2012 (DHS Direct)

# Gabon

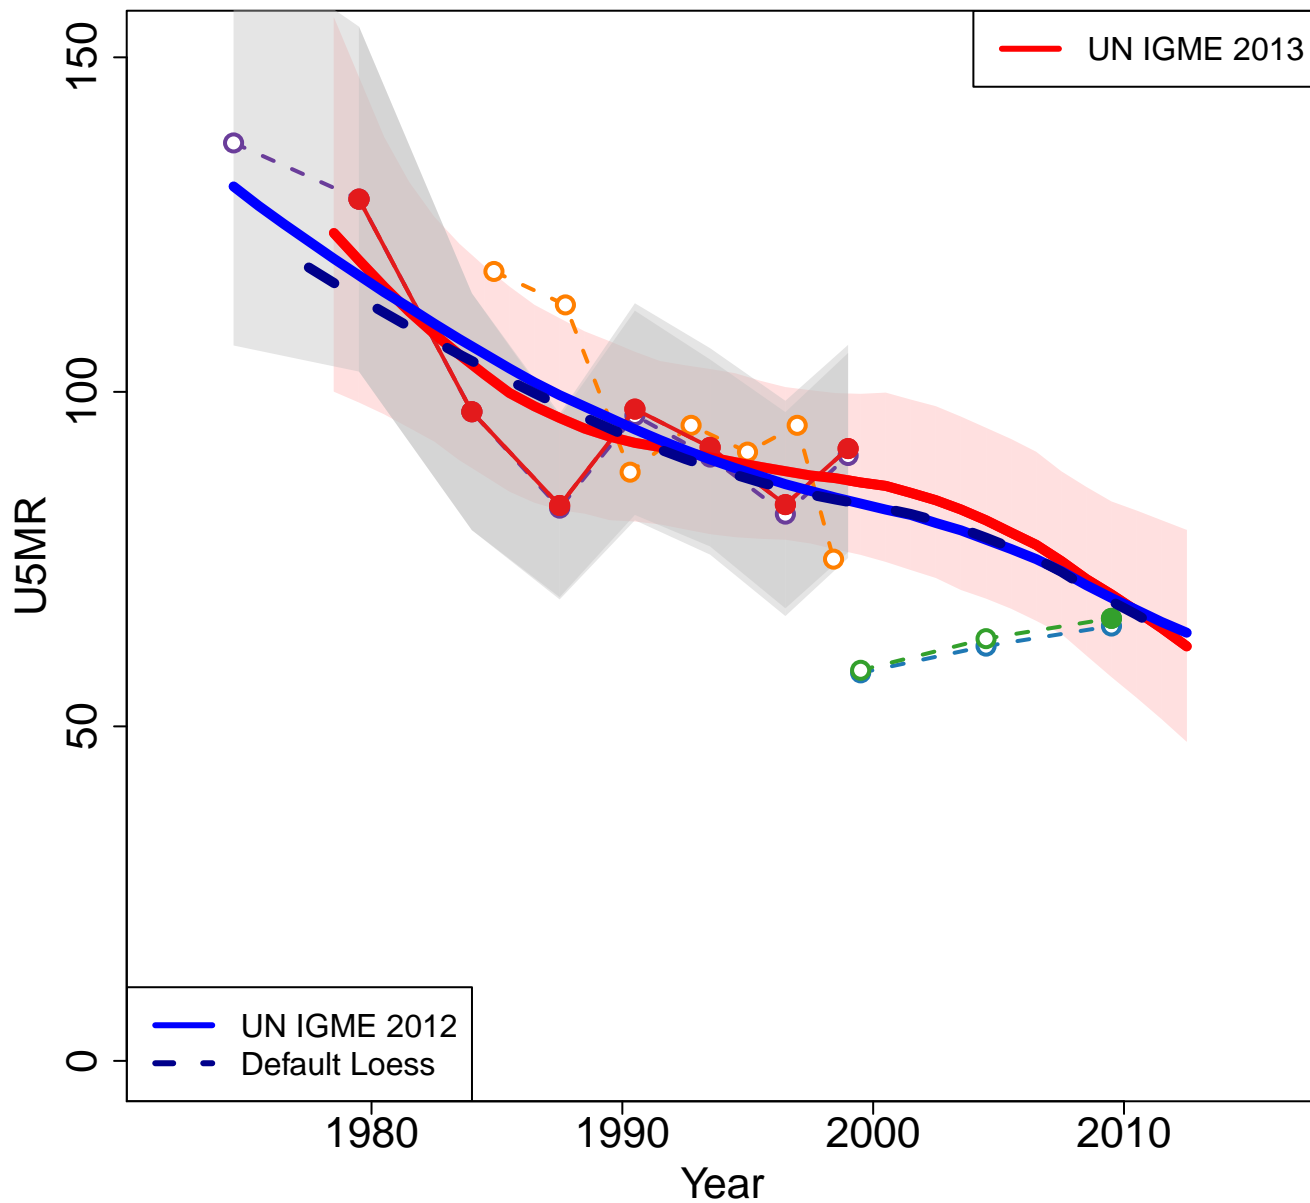

# Zoomed in

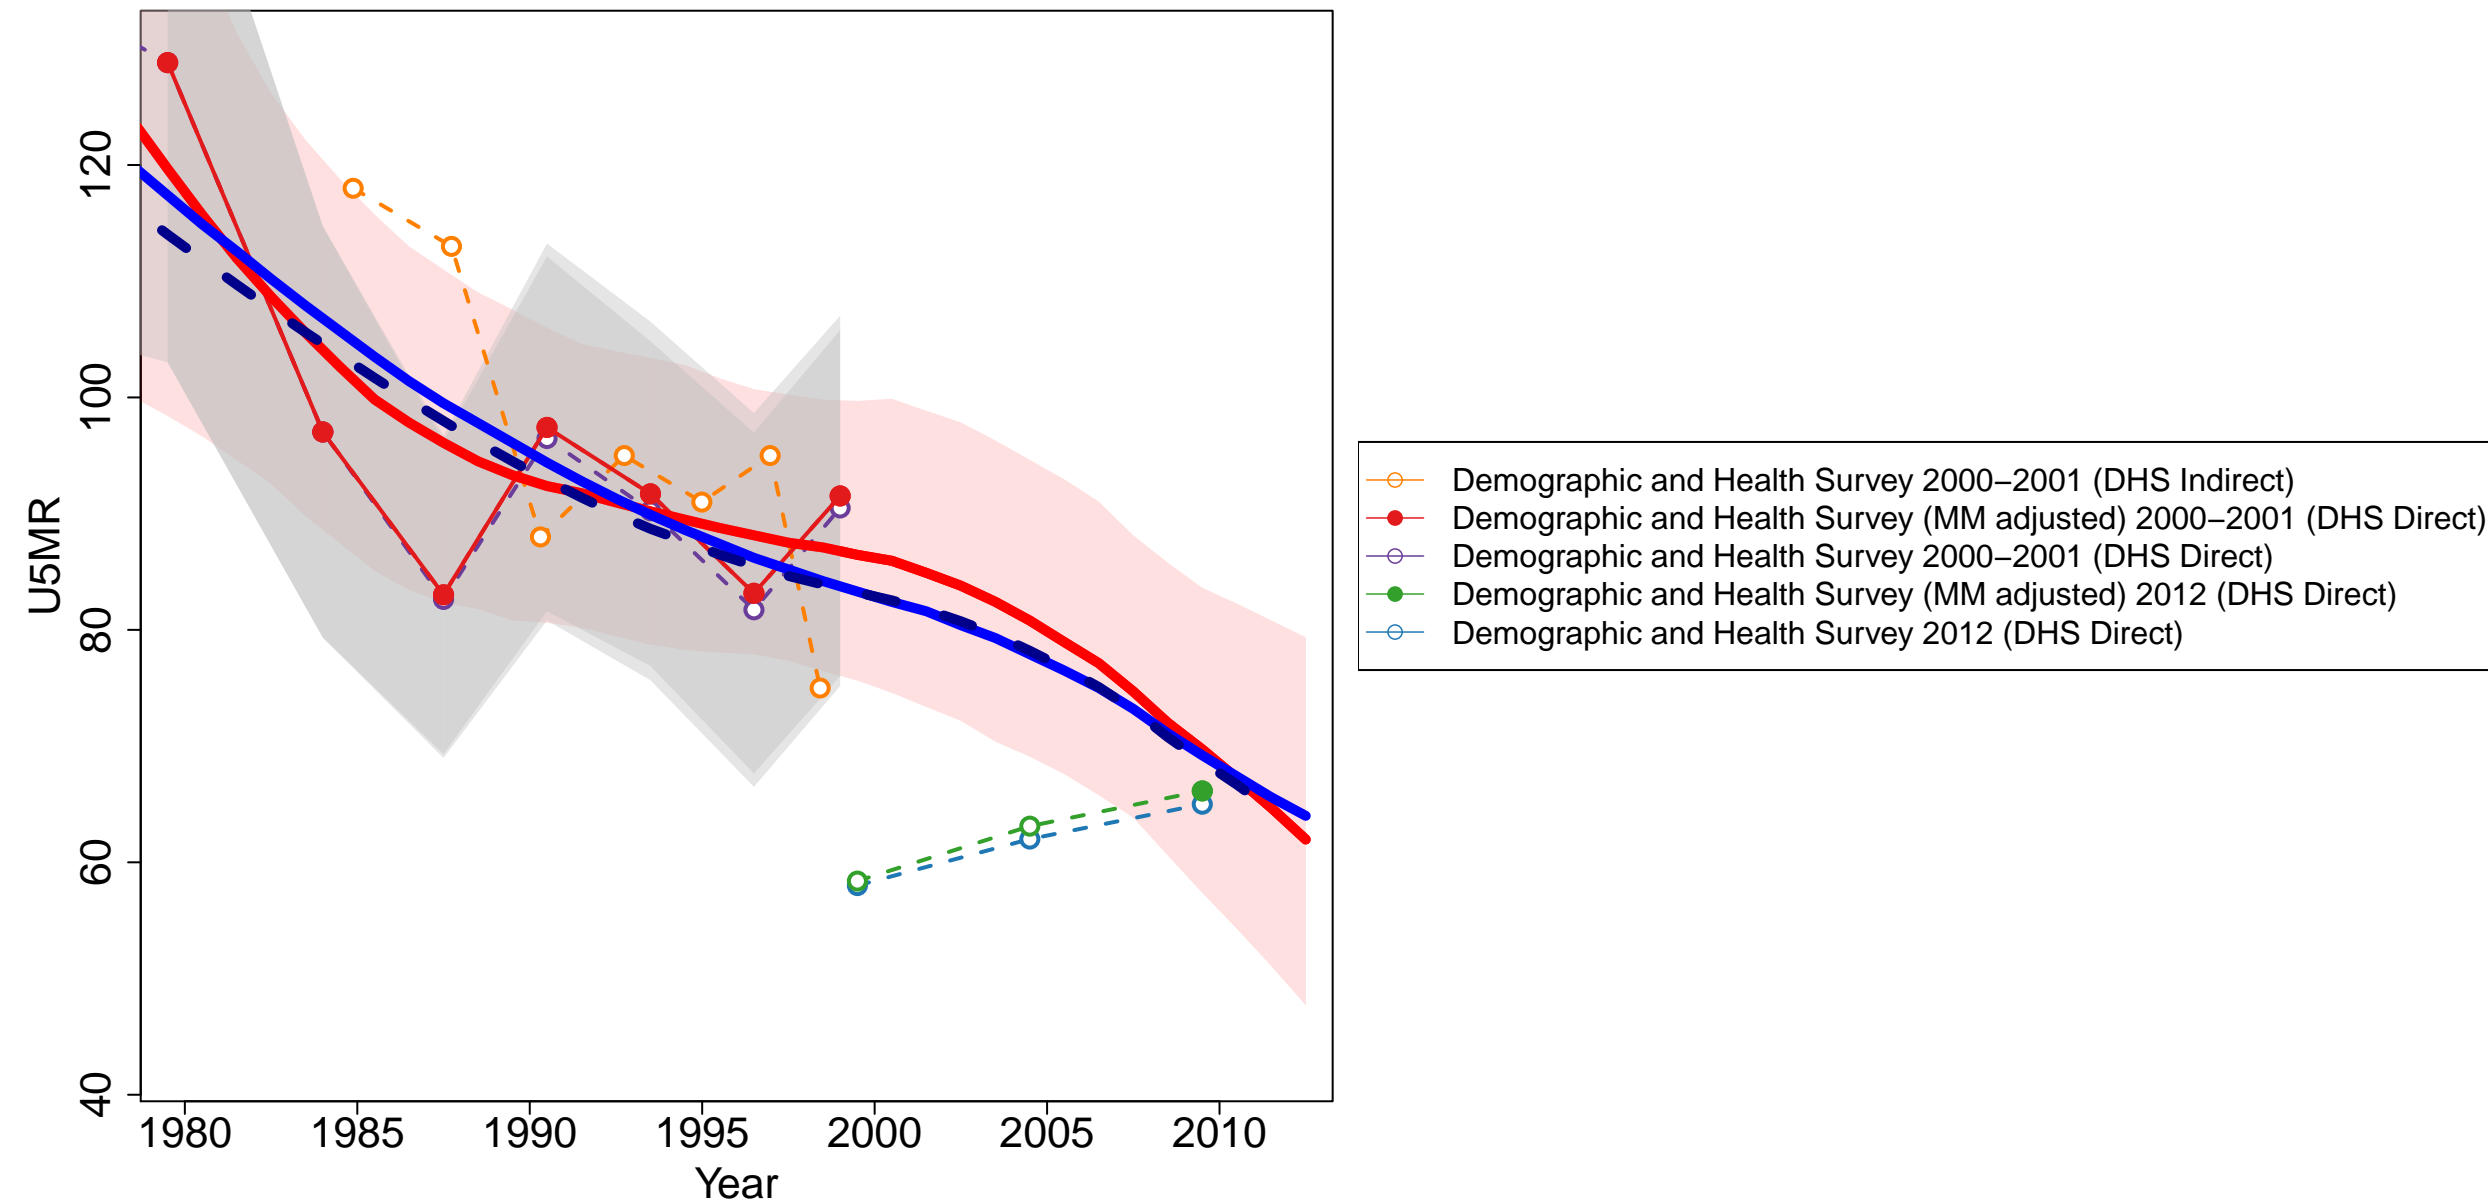



# Kenya

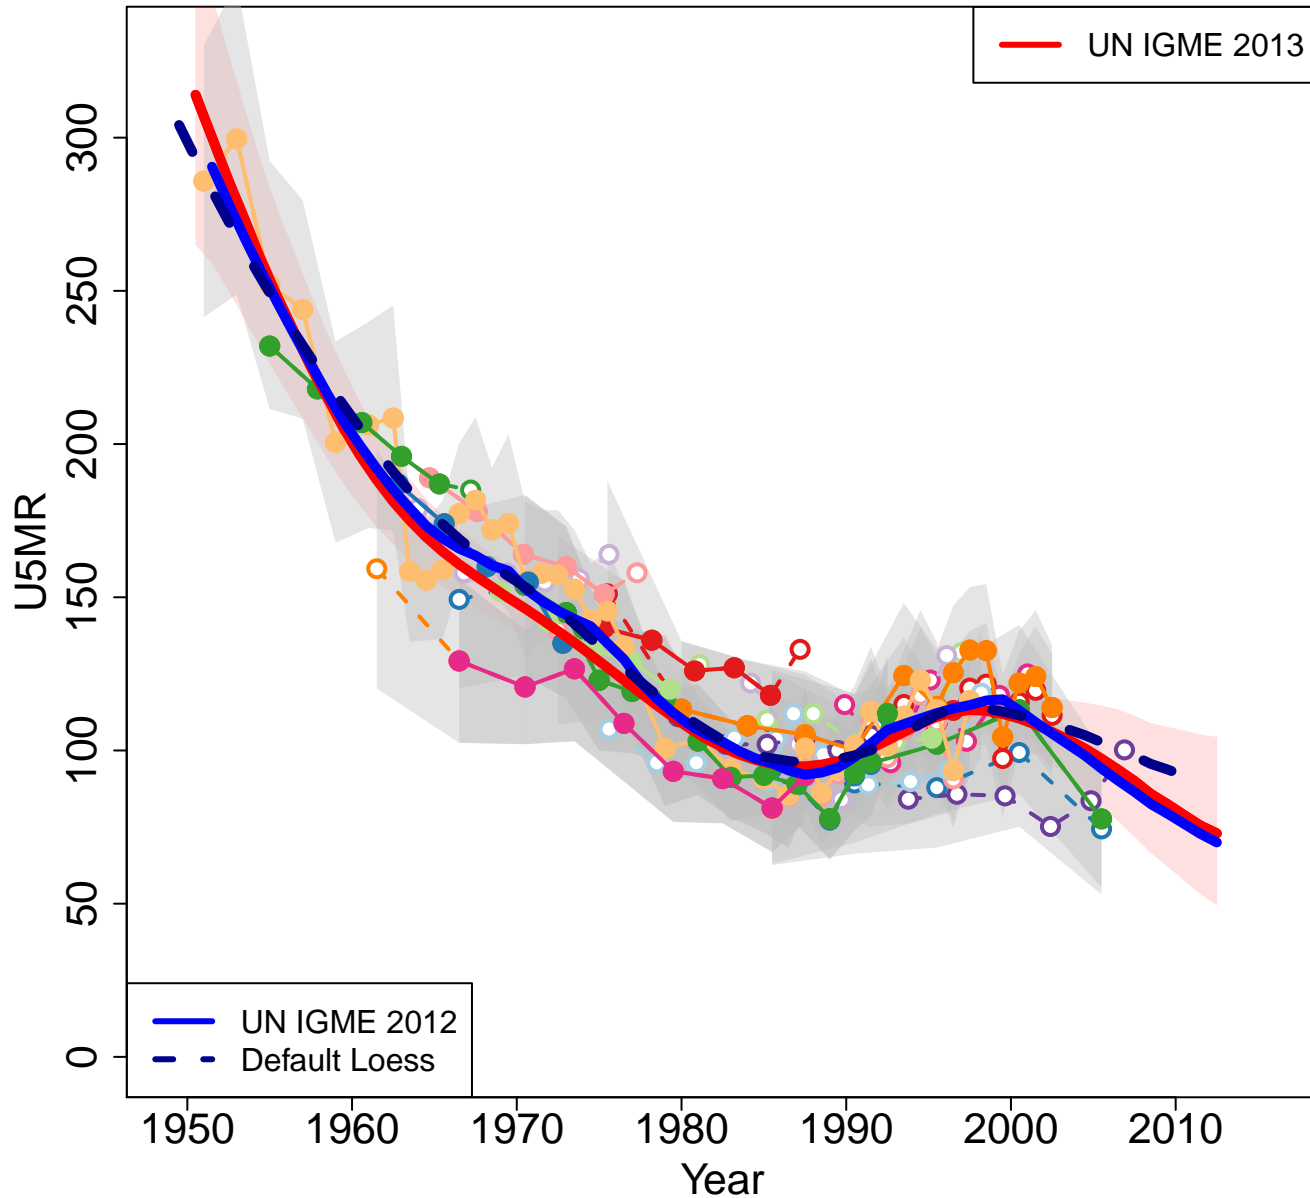

# Zoomed in

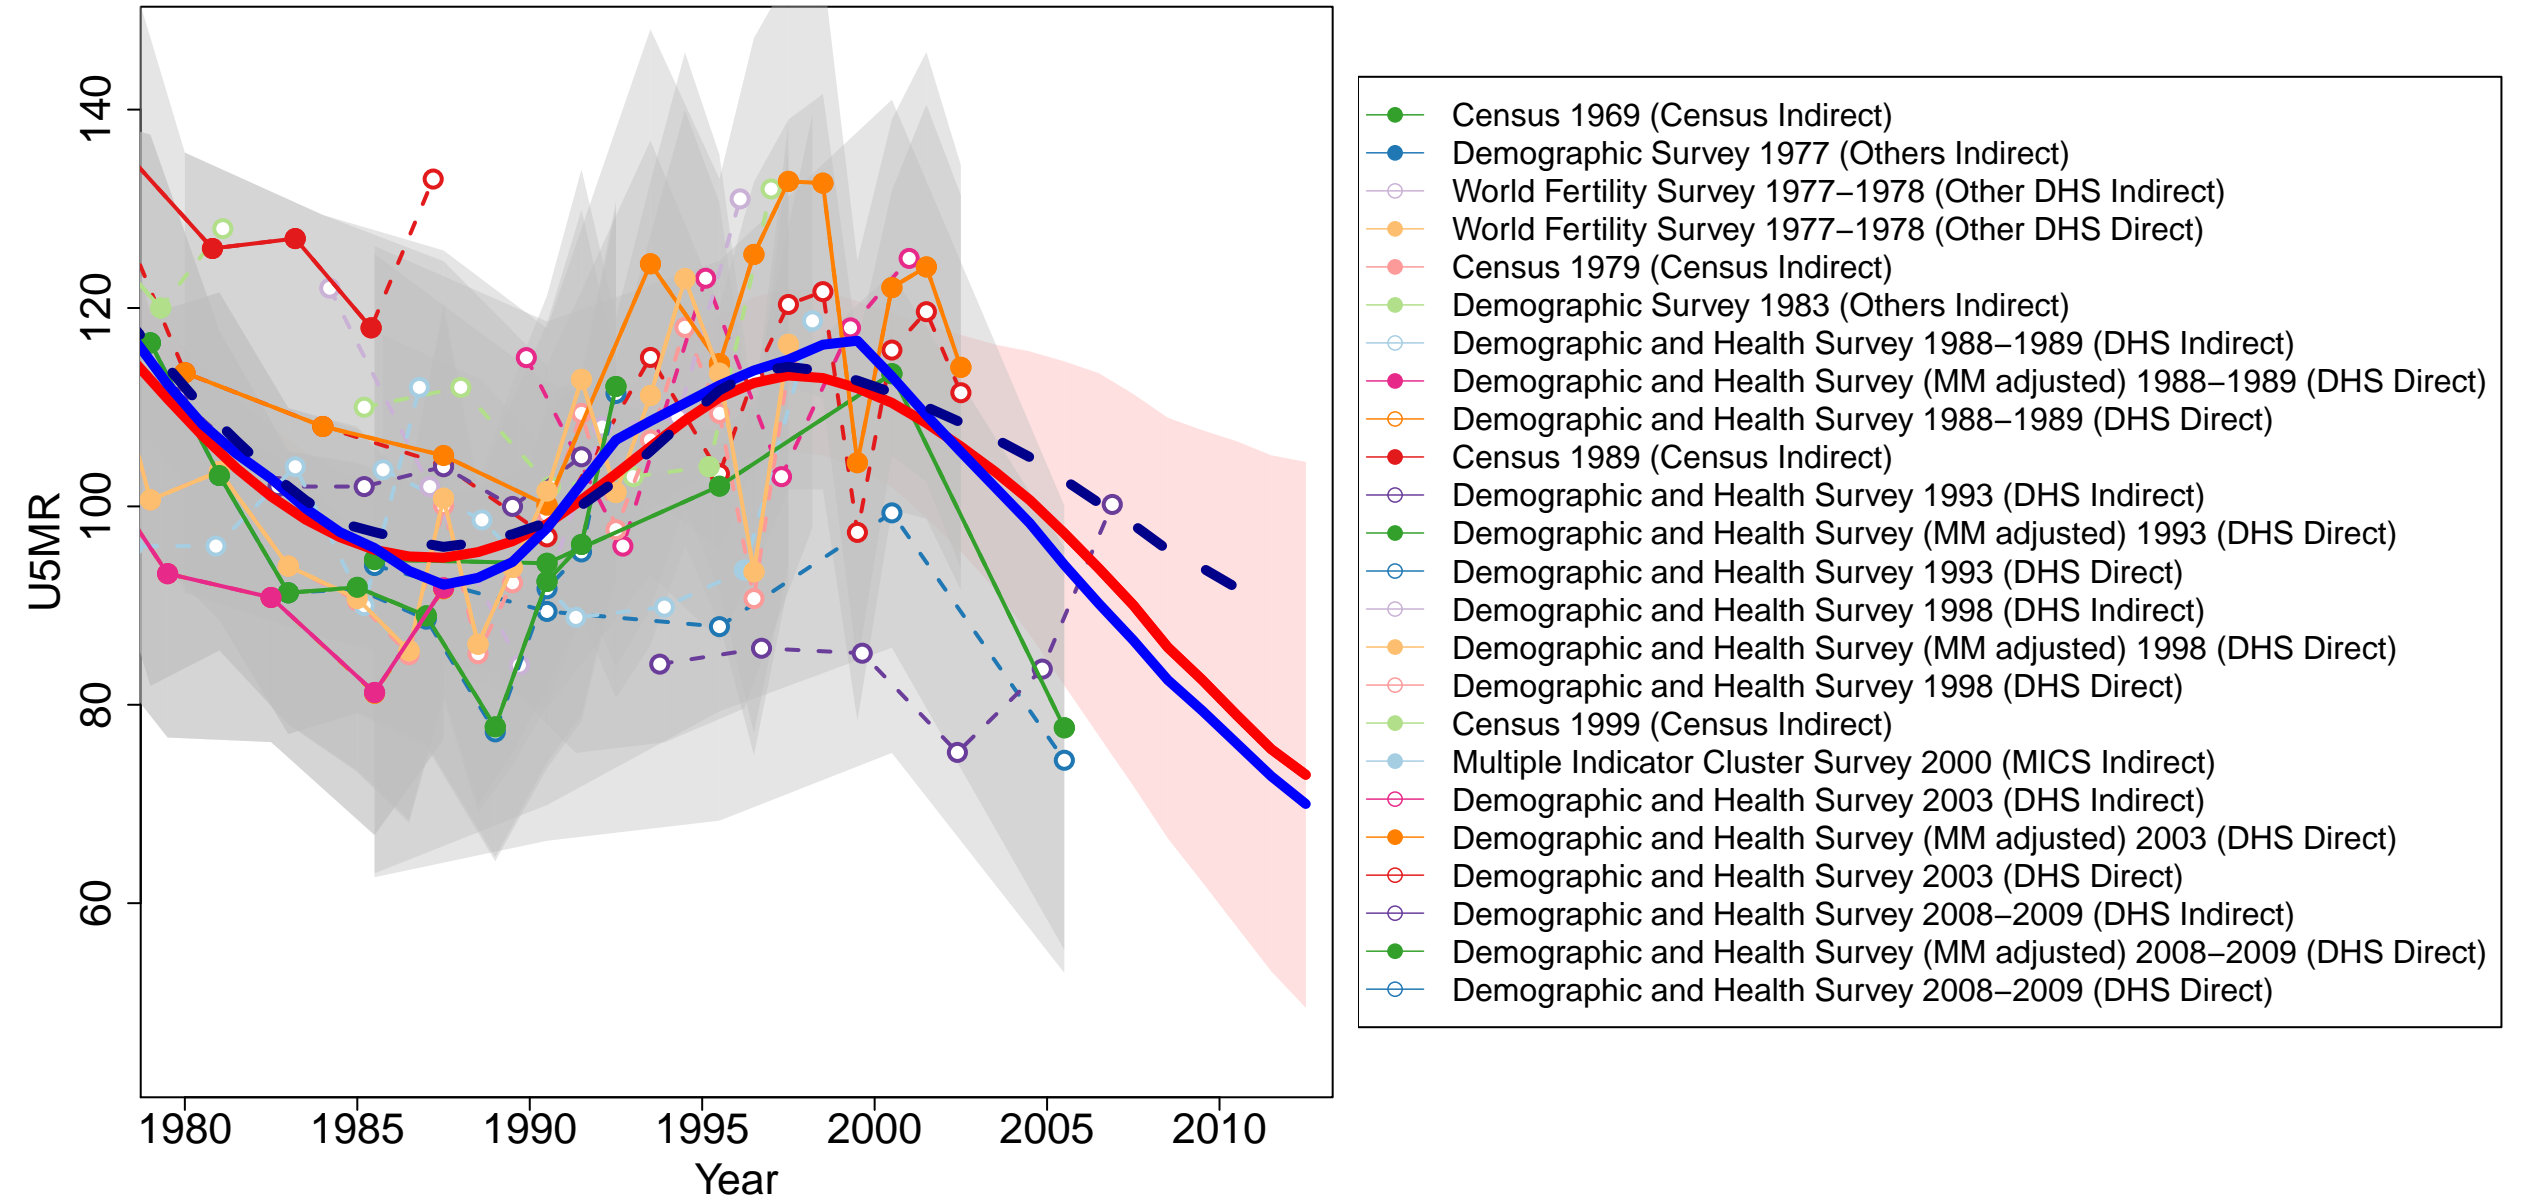

# Lesotho

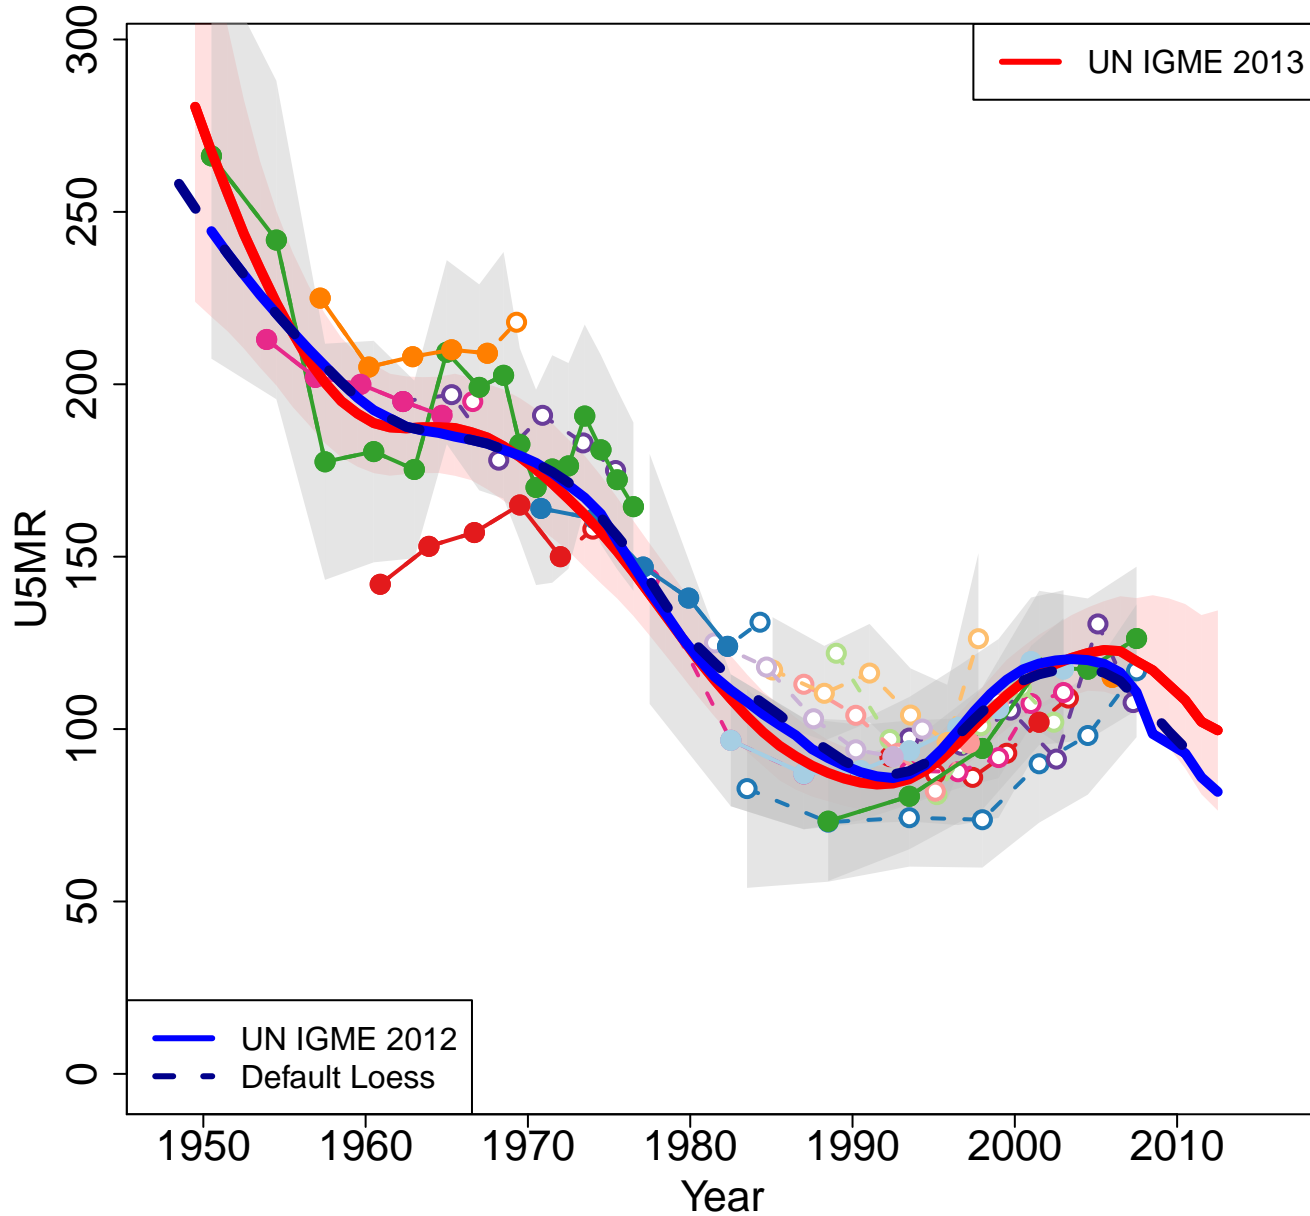

# Zoomed in

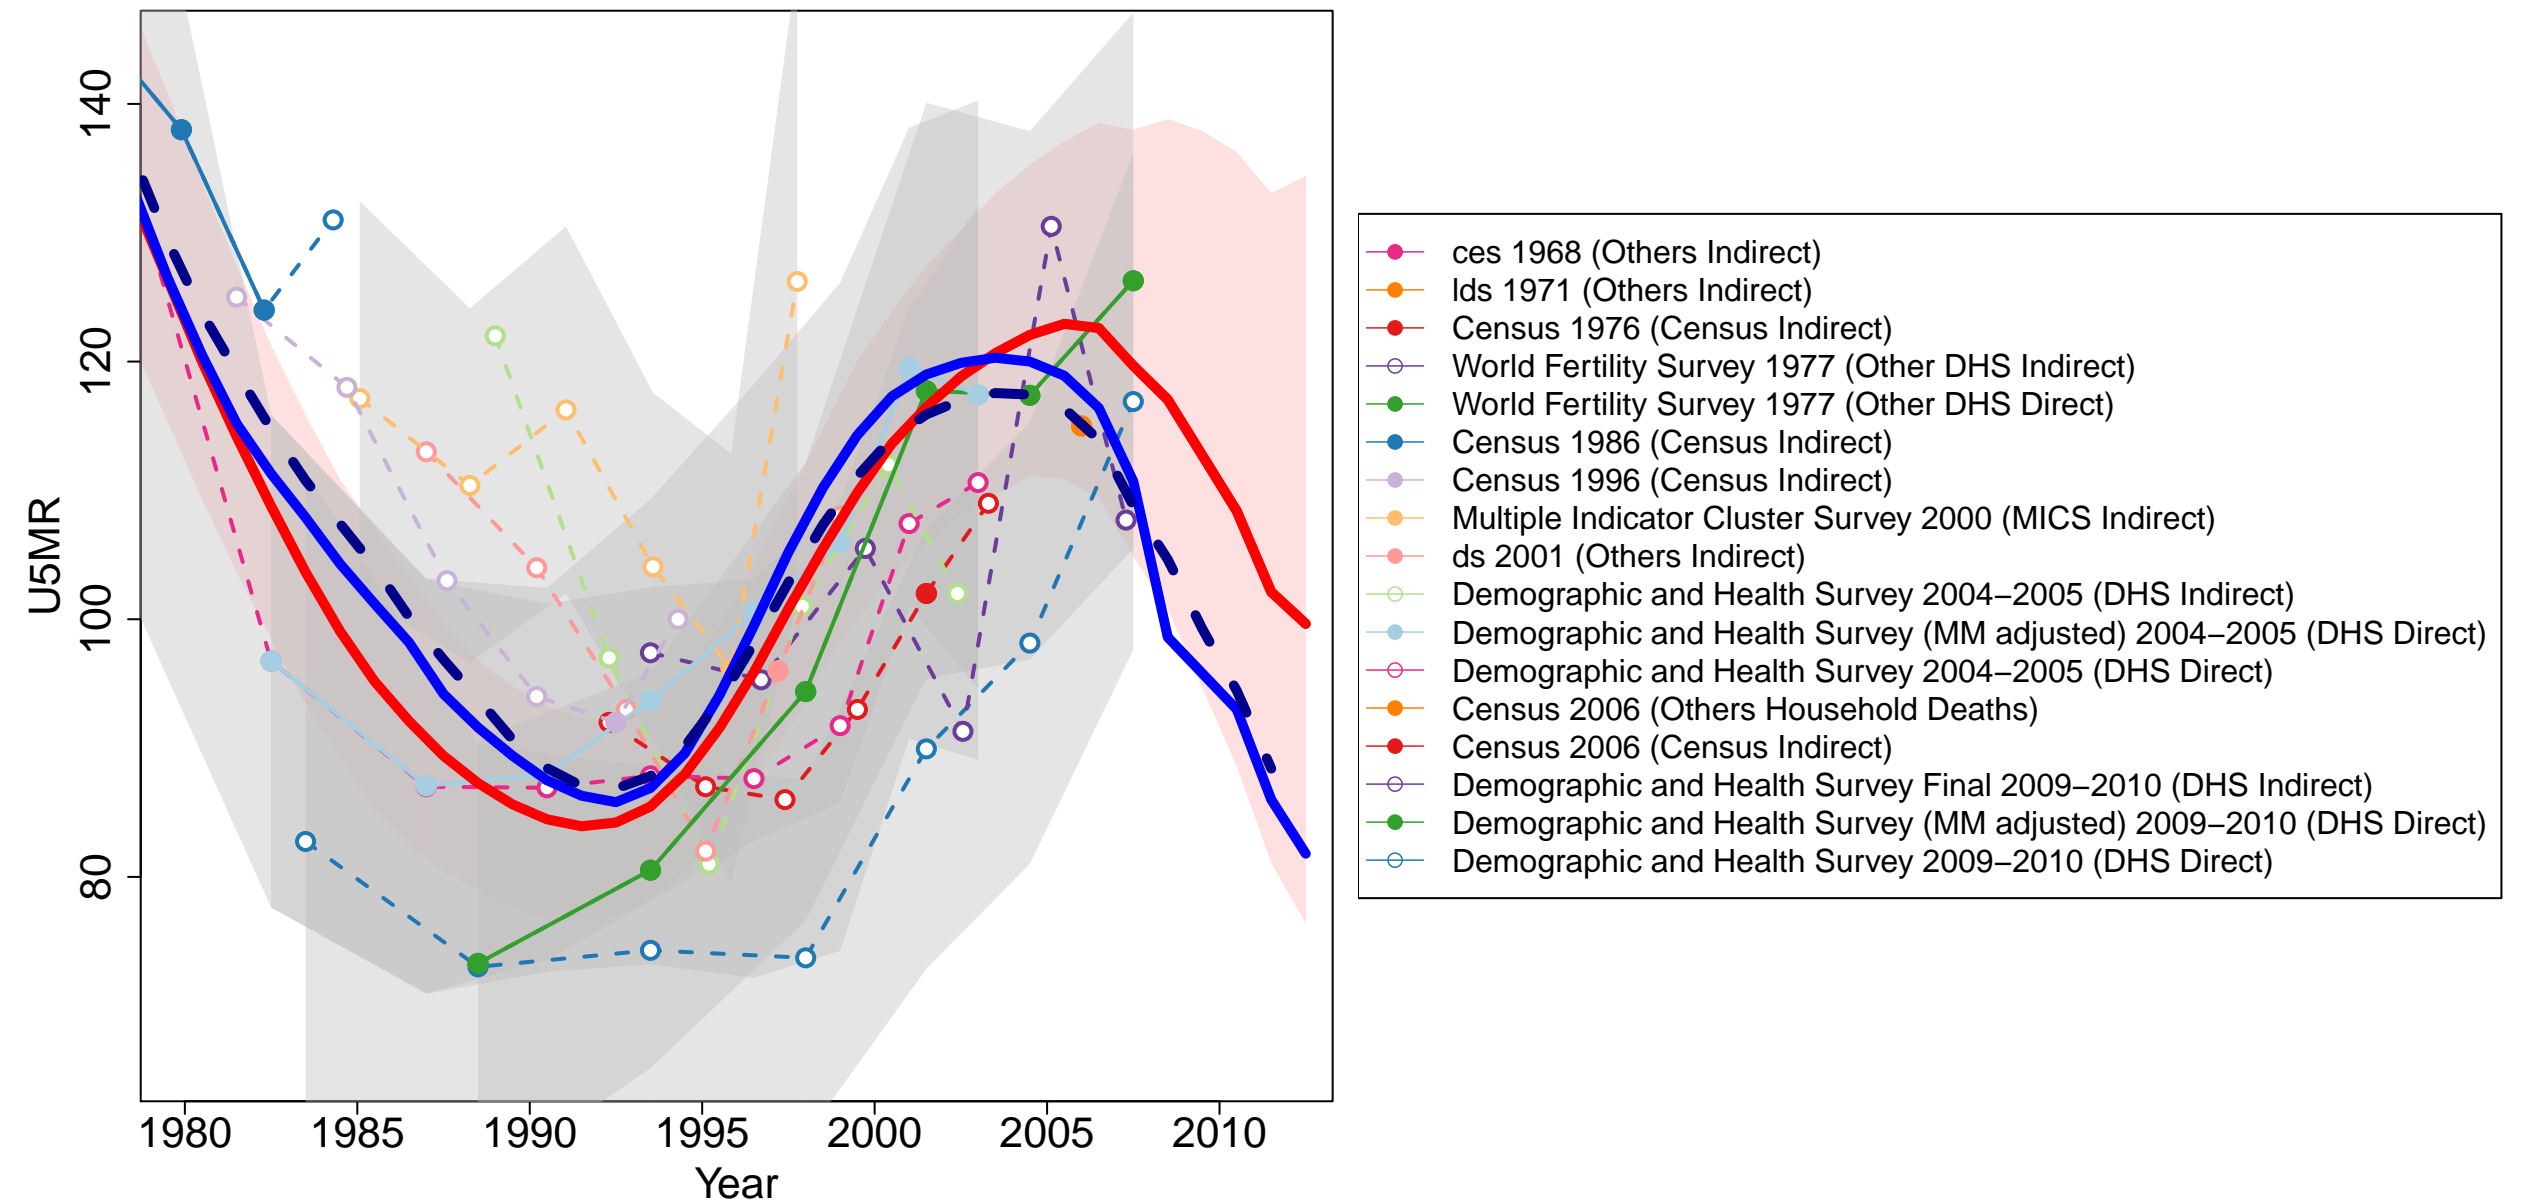

# Malawi

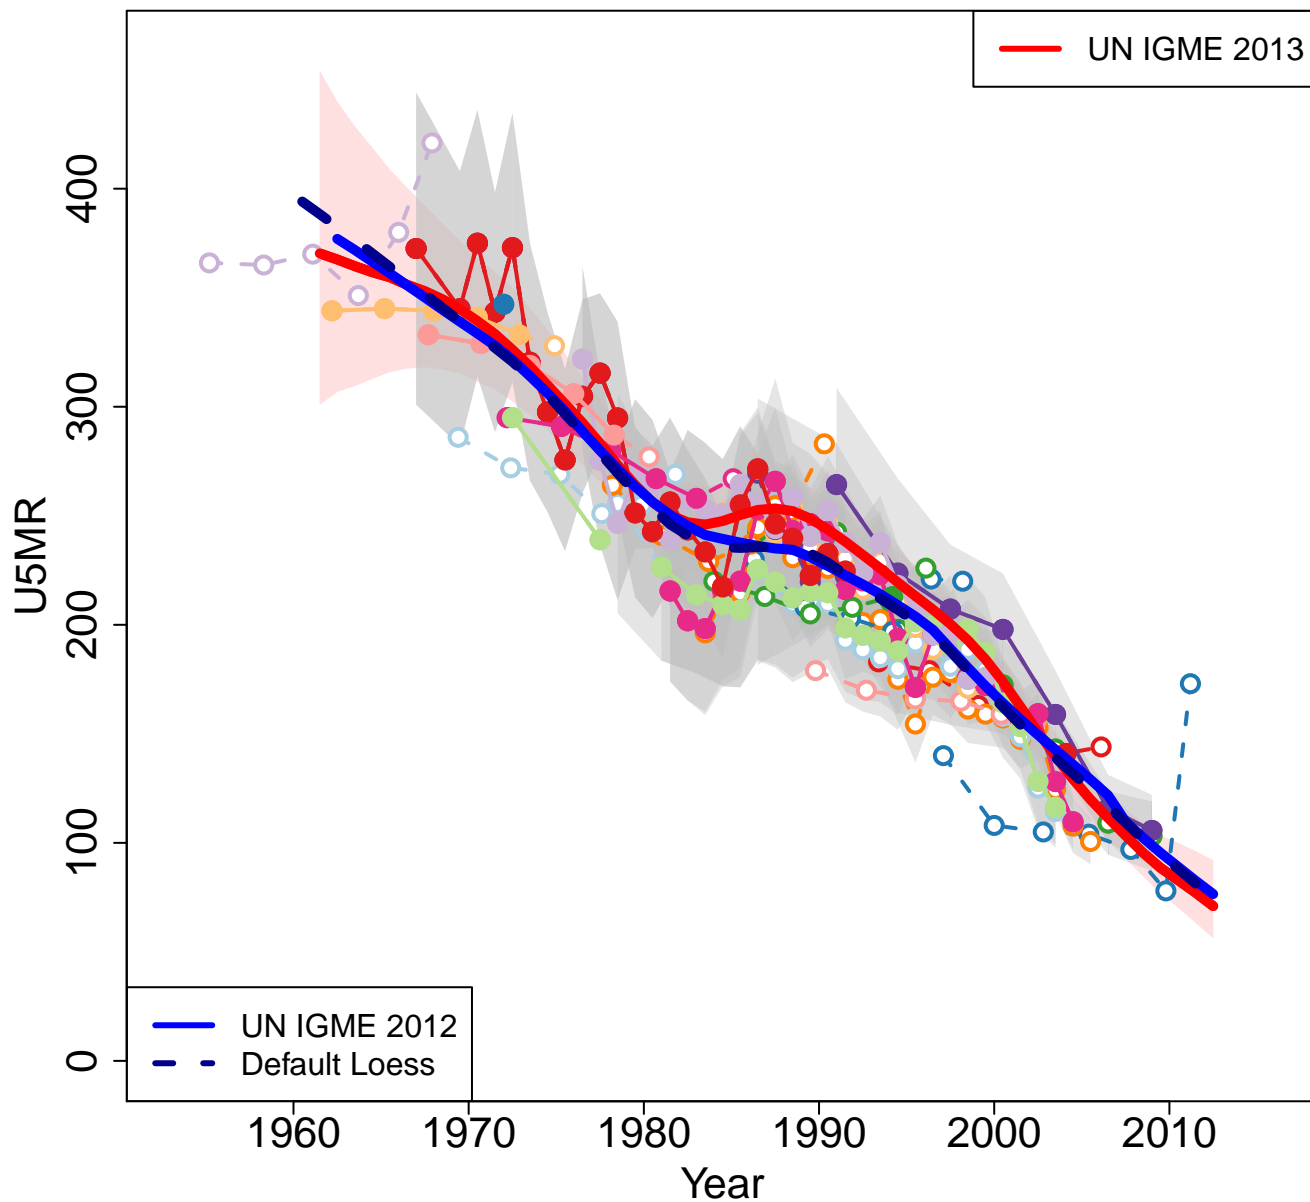

# Zoomed in

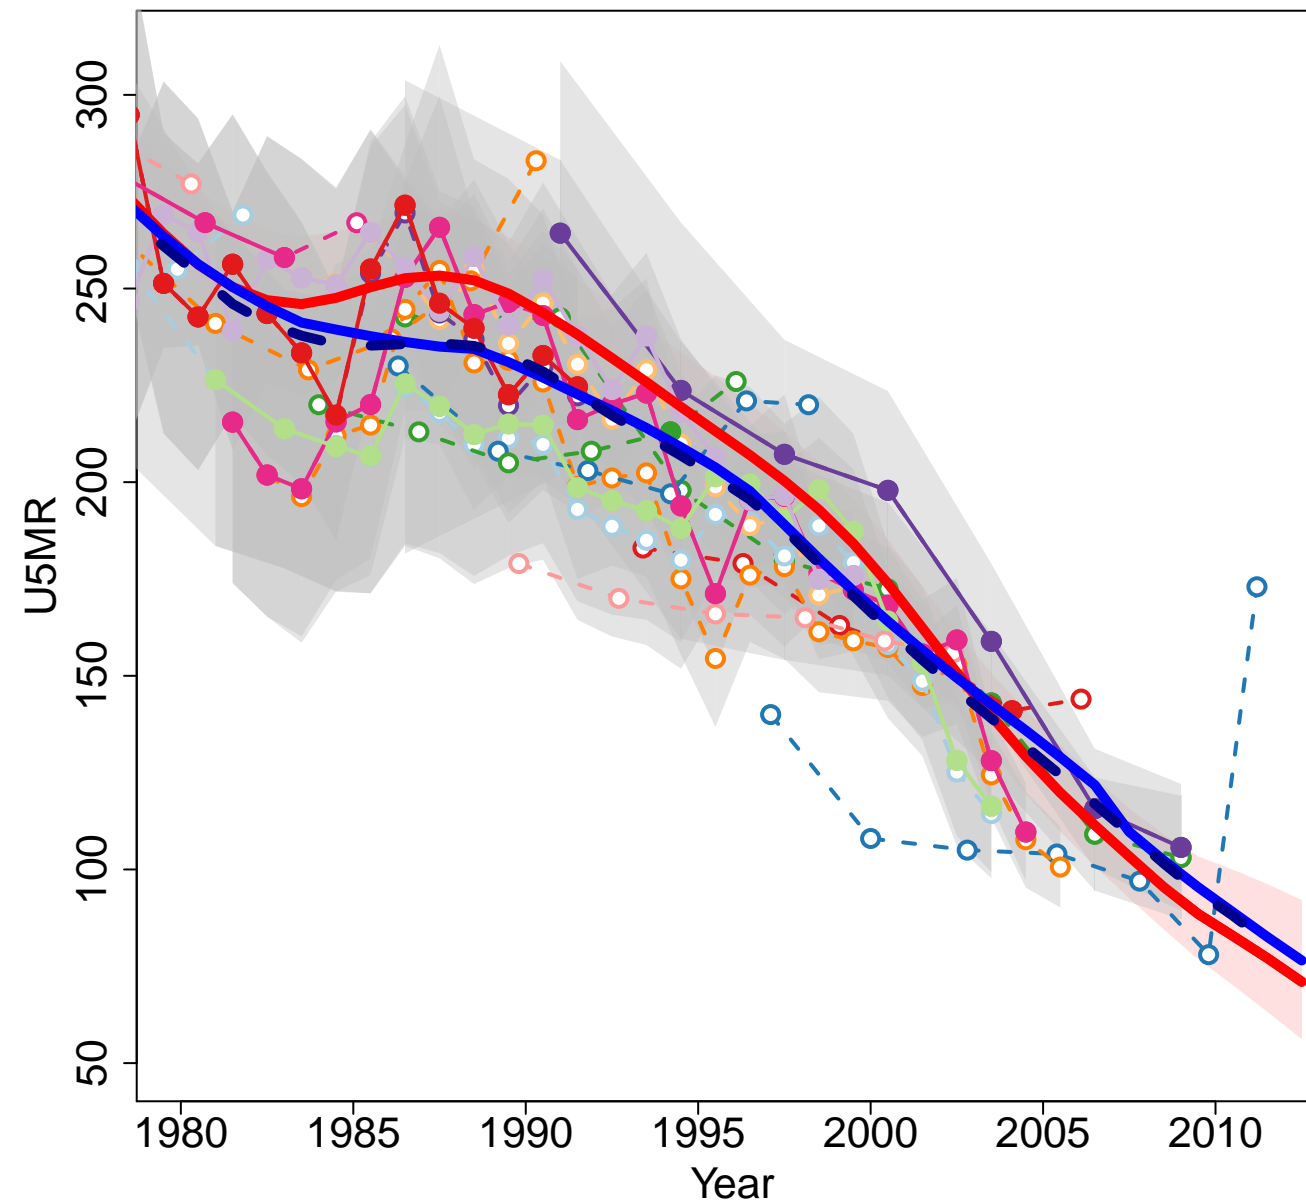

- pcs 1970 (Others Direct)
- pcs 1970 (Others Indirect)
- Census 1977 (Census Indirect)
- mds 1982 (Others Indirect)
- ffs 1984 (Others Direct)
- ffs 1984 (Others Indirect)
- Census 1987 (Census Indirect)
- Demographic and Health Survey 1992 (DHS Indirect)
- Demographic and Health Survey (MM adjusted) 1992 (DHS Direct)
- Demographic and Health Survey 1992 (DHS Direct)
- Census 1998 (Census Indirect)
- Demographic and Health Survey 2000 (DHS Indirect)
- Demographic and Health Survey (MM adjusted) 2000 (DHS Direct)
- Demographic and Health Survey 2000 (DHS Direct)
- Demographic and Health Survey 2004–2005 (DHS Indirect)
- Demographic and Health Survey (MM adjusted) 2004–2005 (DHS Direct)
- Demographic and Health Survey 2004–2005 (DHS Direct)
- Multiple Indicator Cluster Survey (MM adjusted) 2006 (MICS Direct)
- Multiple Indicator Cluster Survey 2006 (MICS Direct)
- Census 2008 (Census Indirect)
- Demographic and Health Survey (MM adjusted) 2010 (DHS Direct)
- Demographic and Health Survey 2010 (DHS Direct)
- Malaria Indicator Survey 2012 (Other DHS Indirect)

# Mozambique

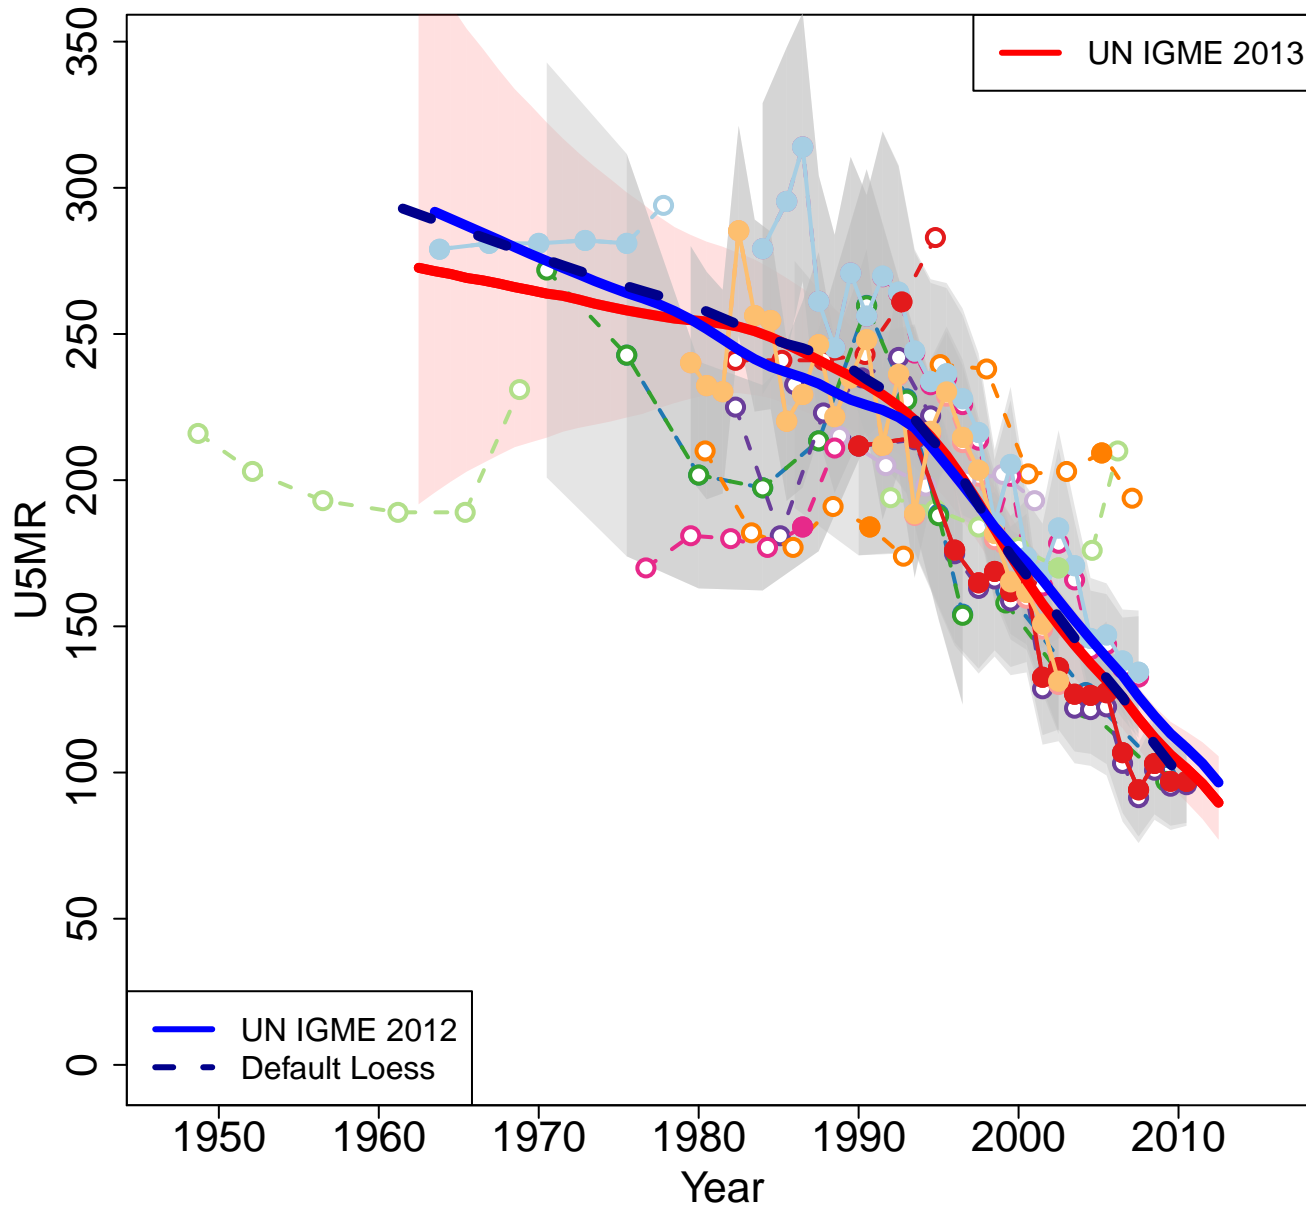

# Zoomed in

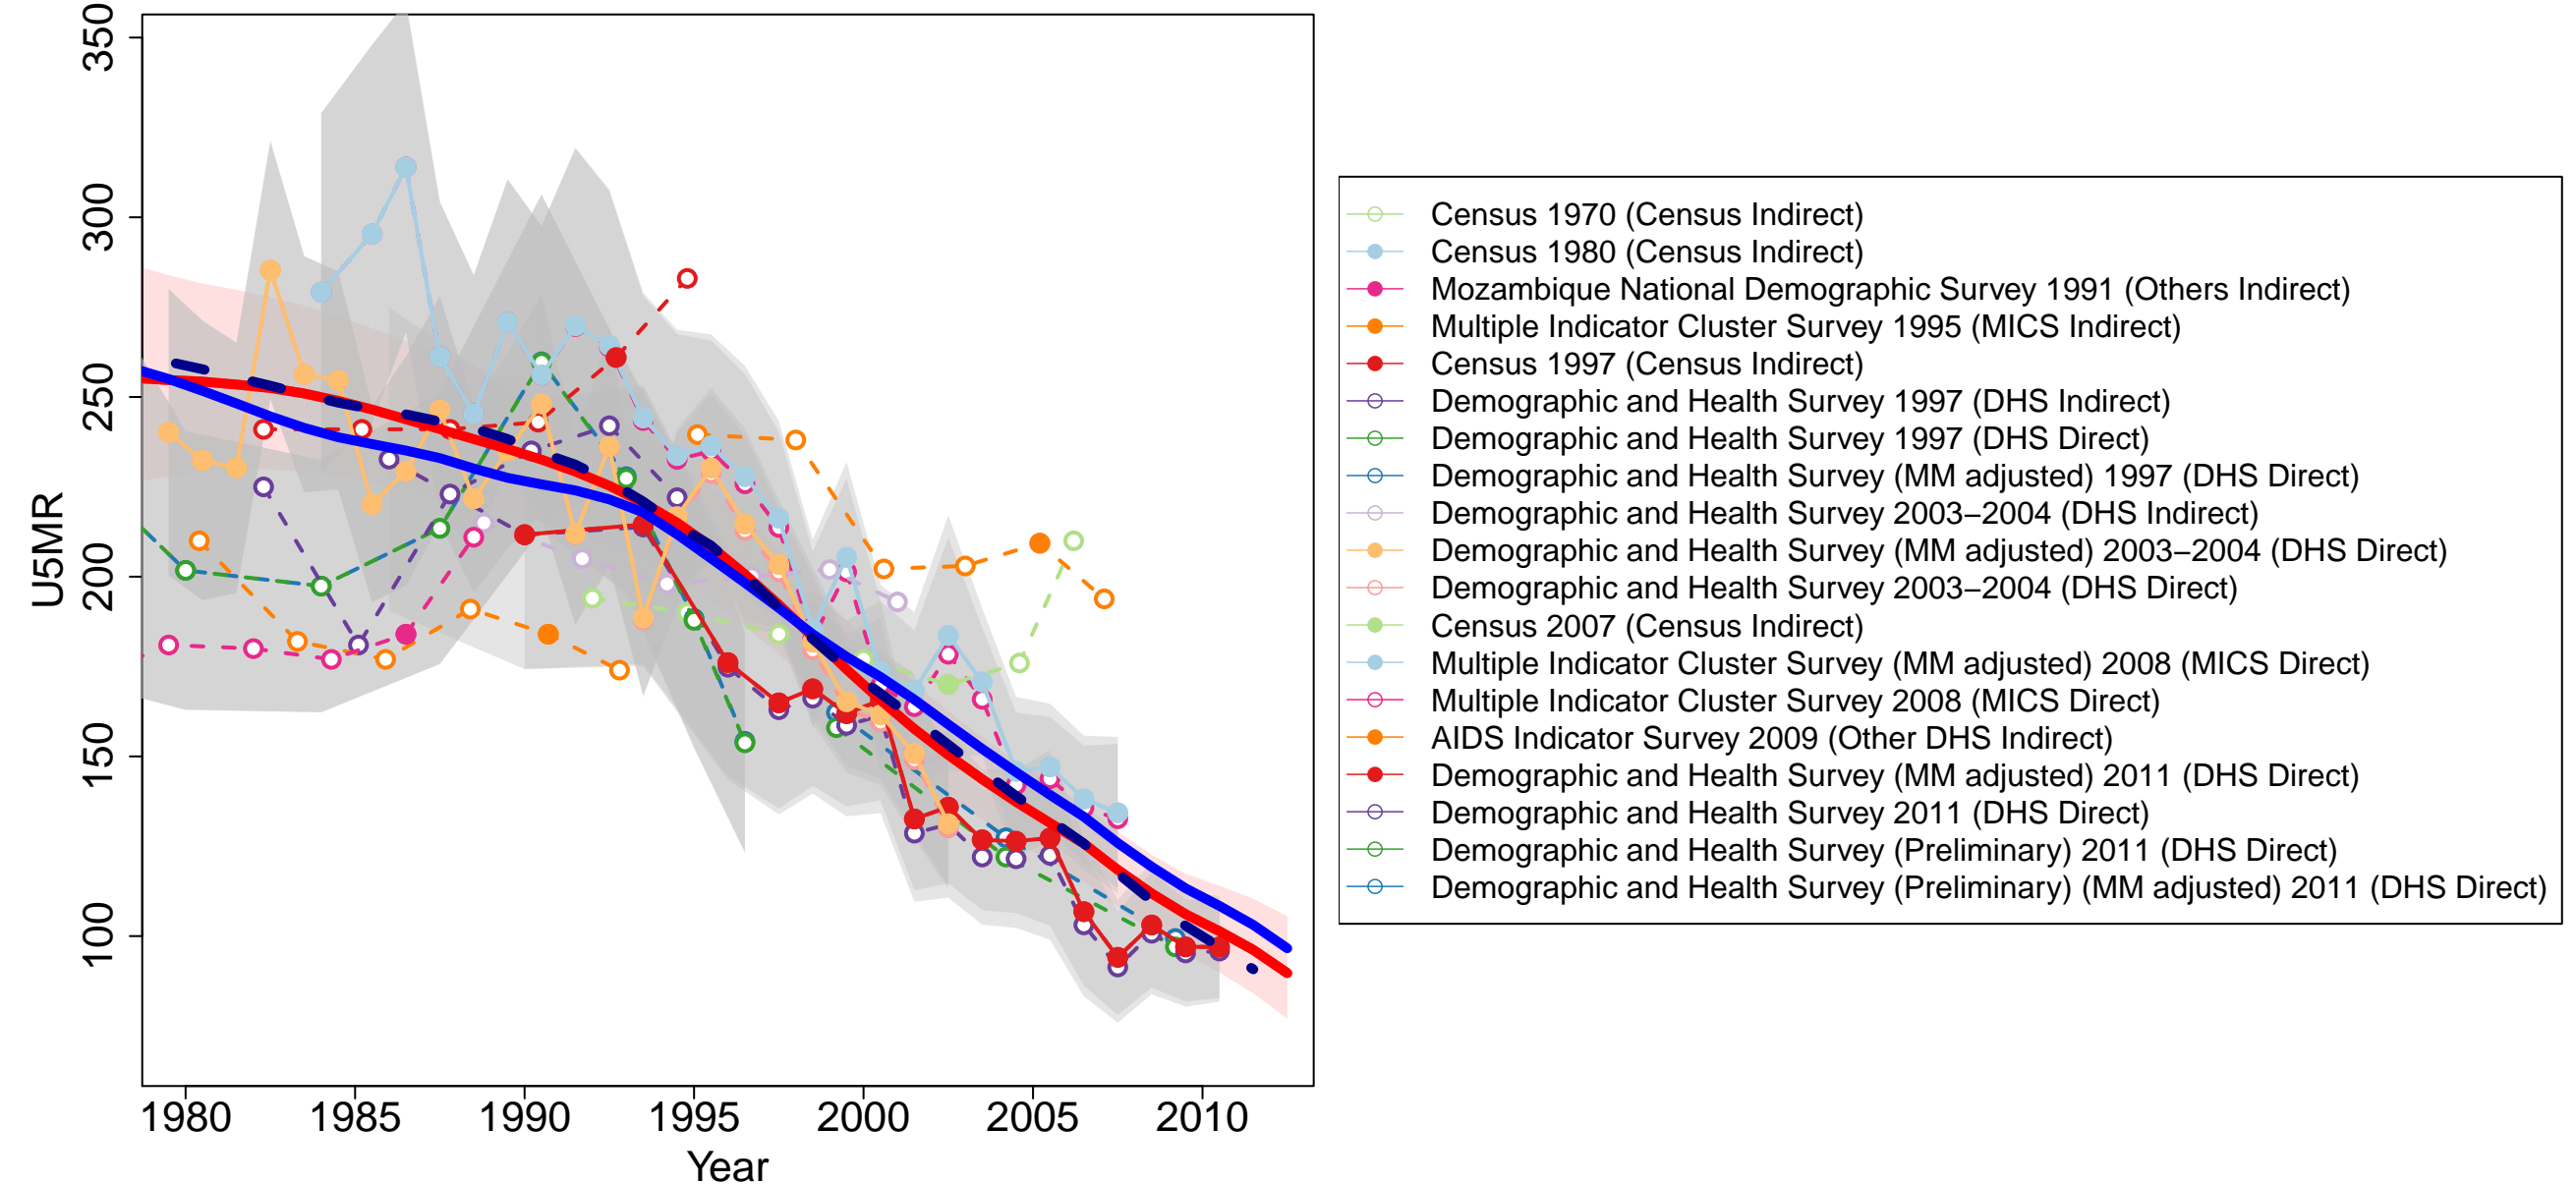

# Namibia

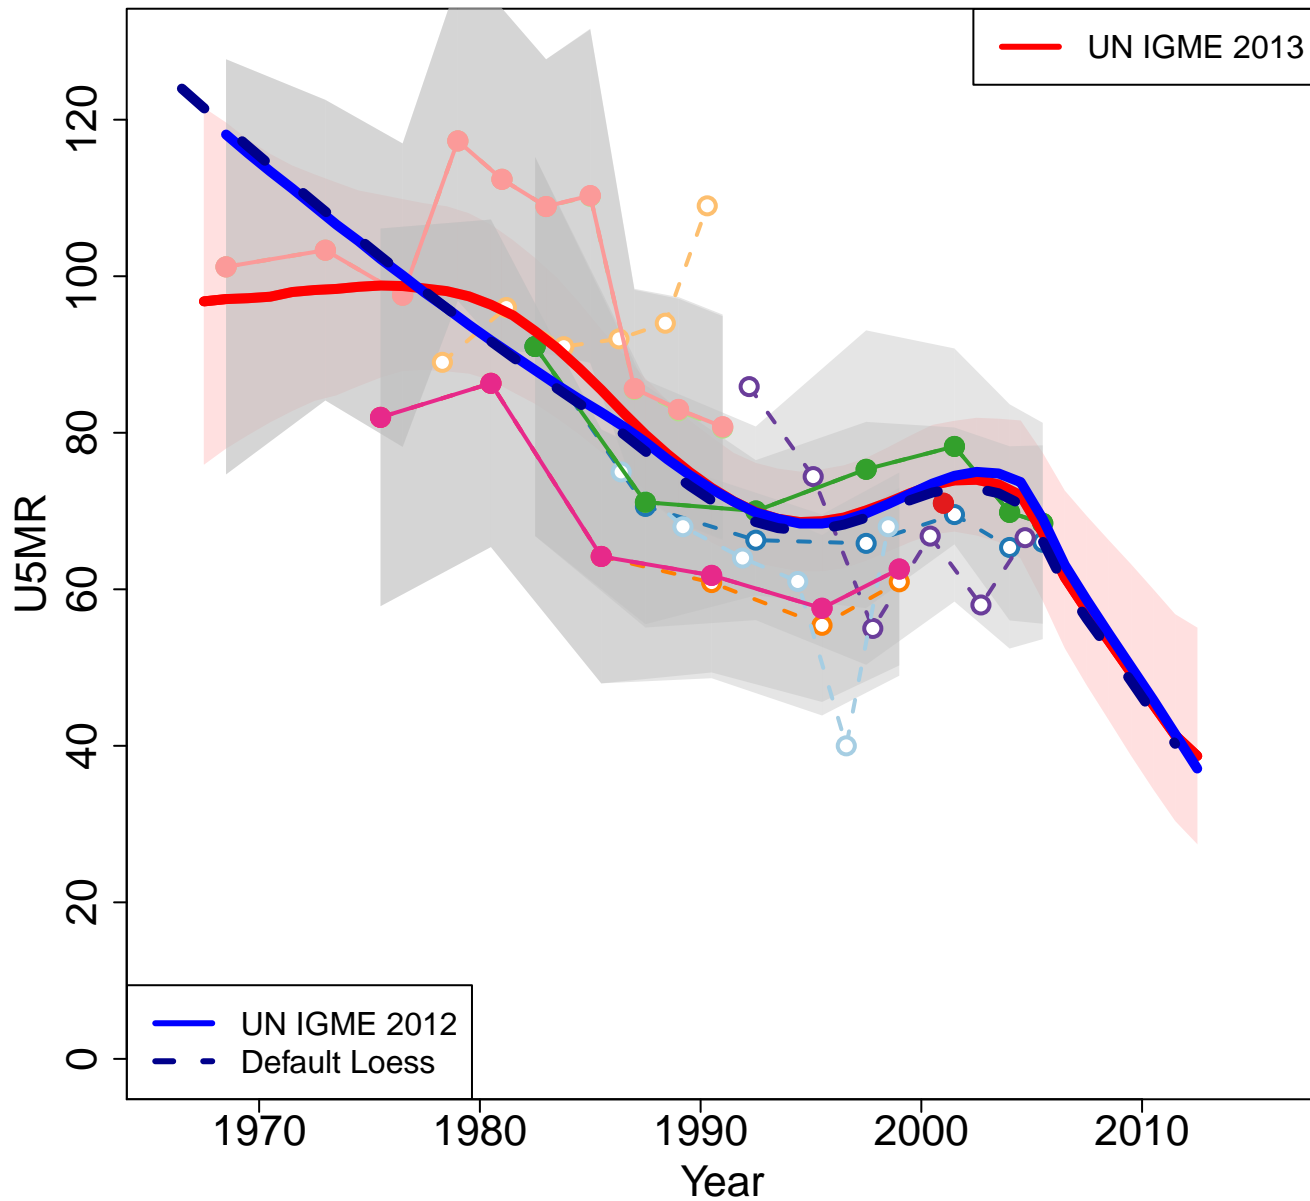

# Zoomed in

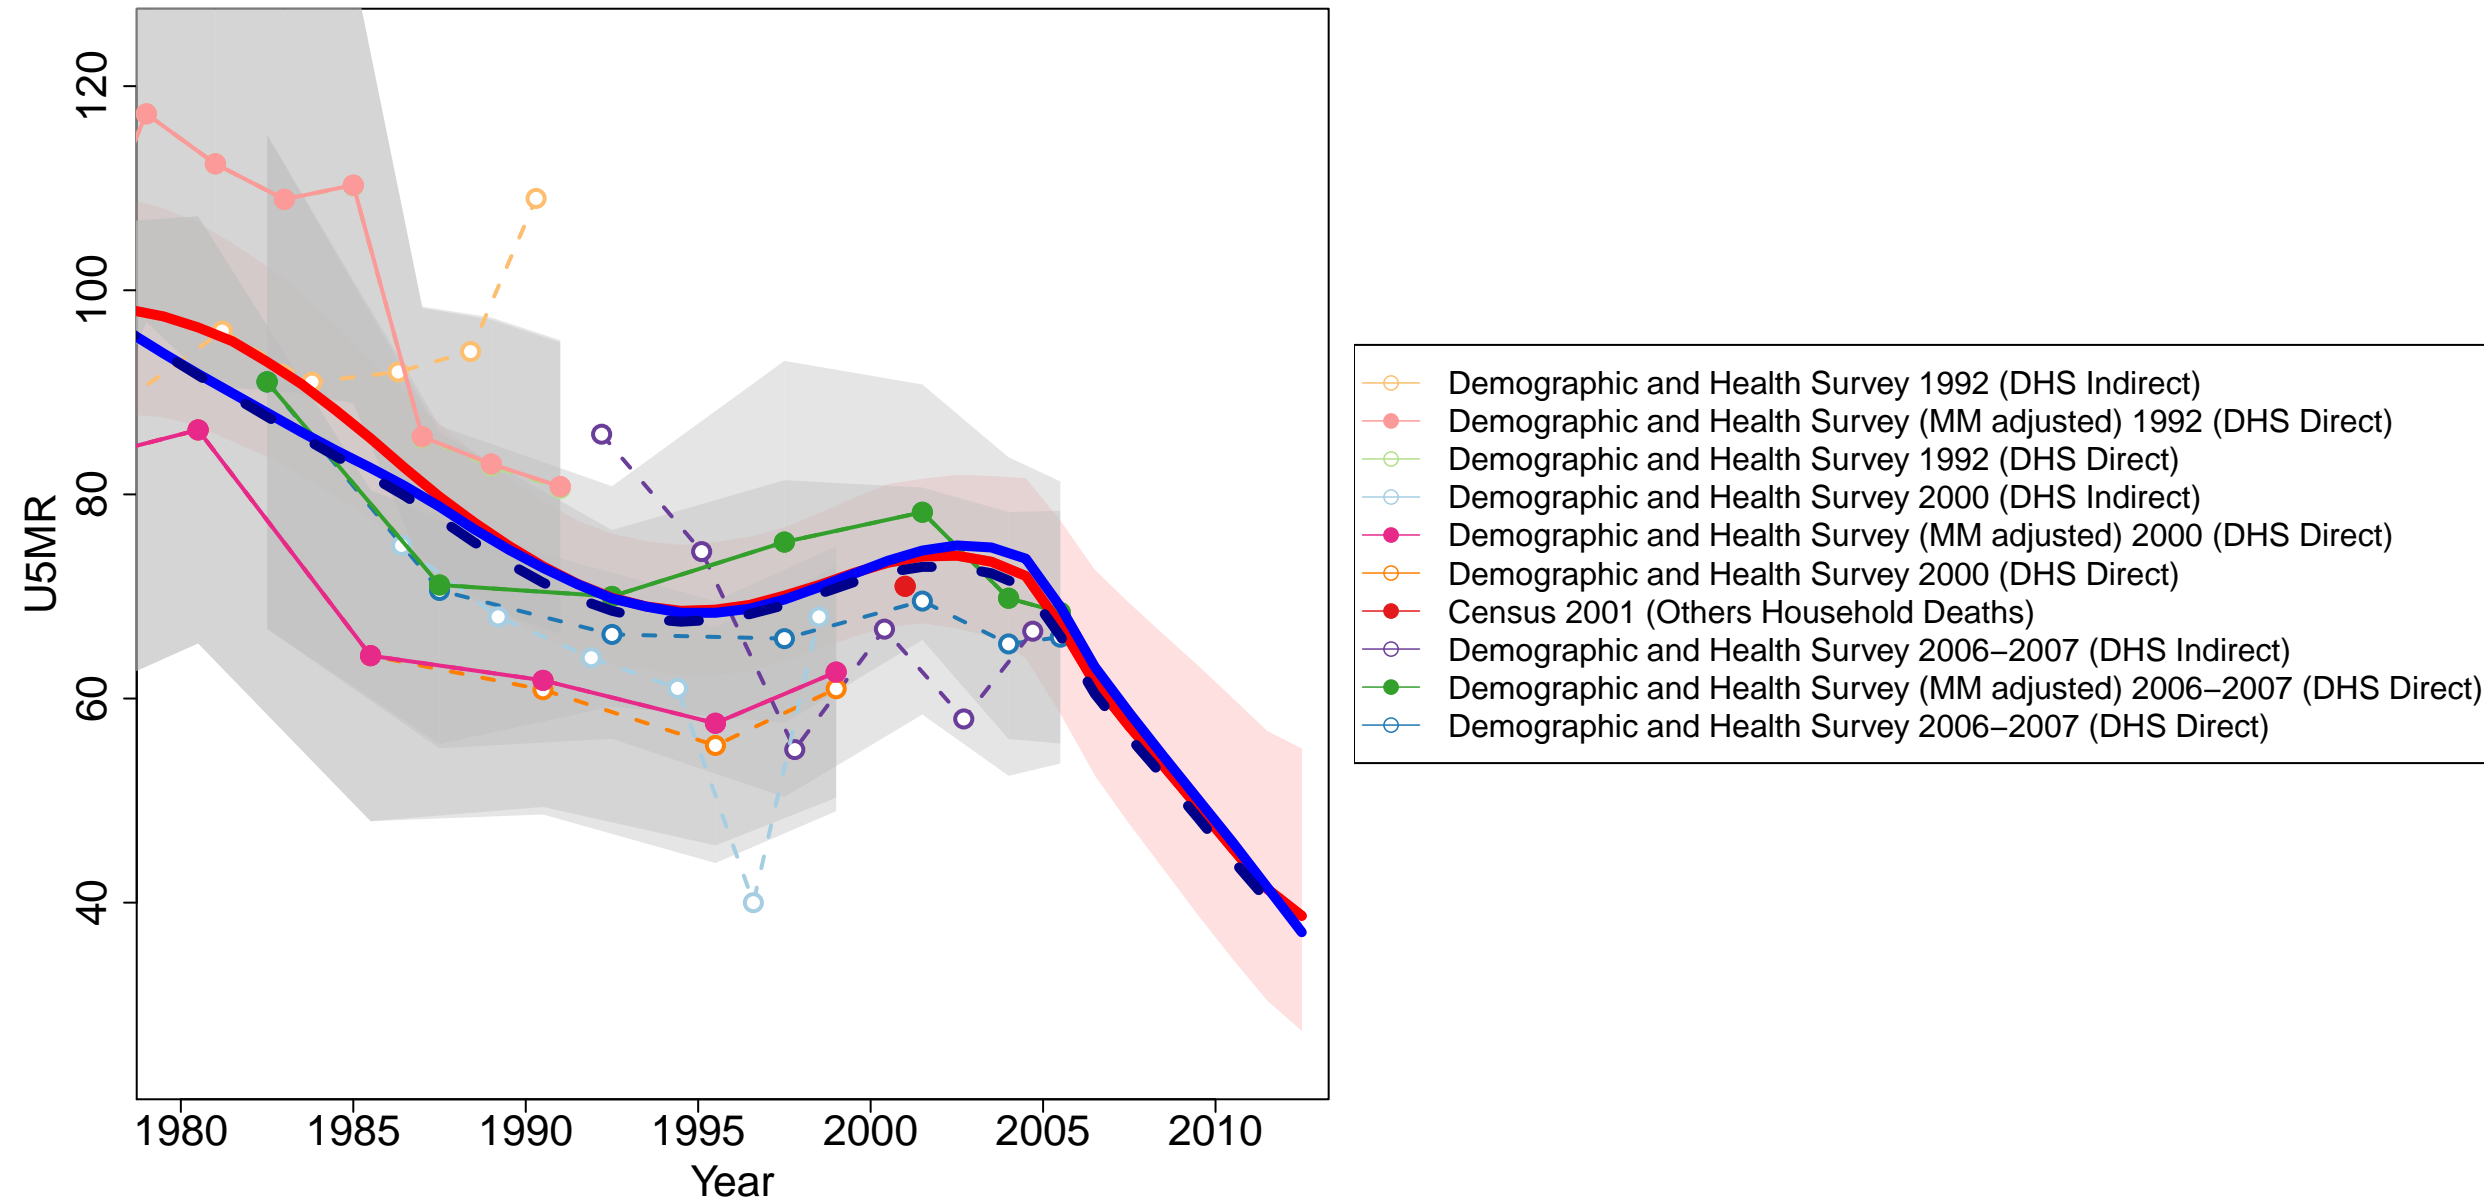



# Rwanda

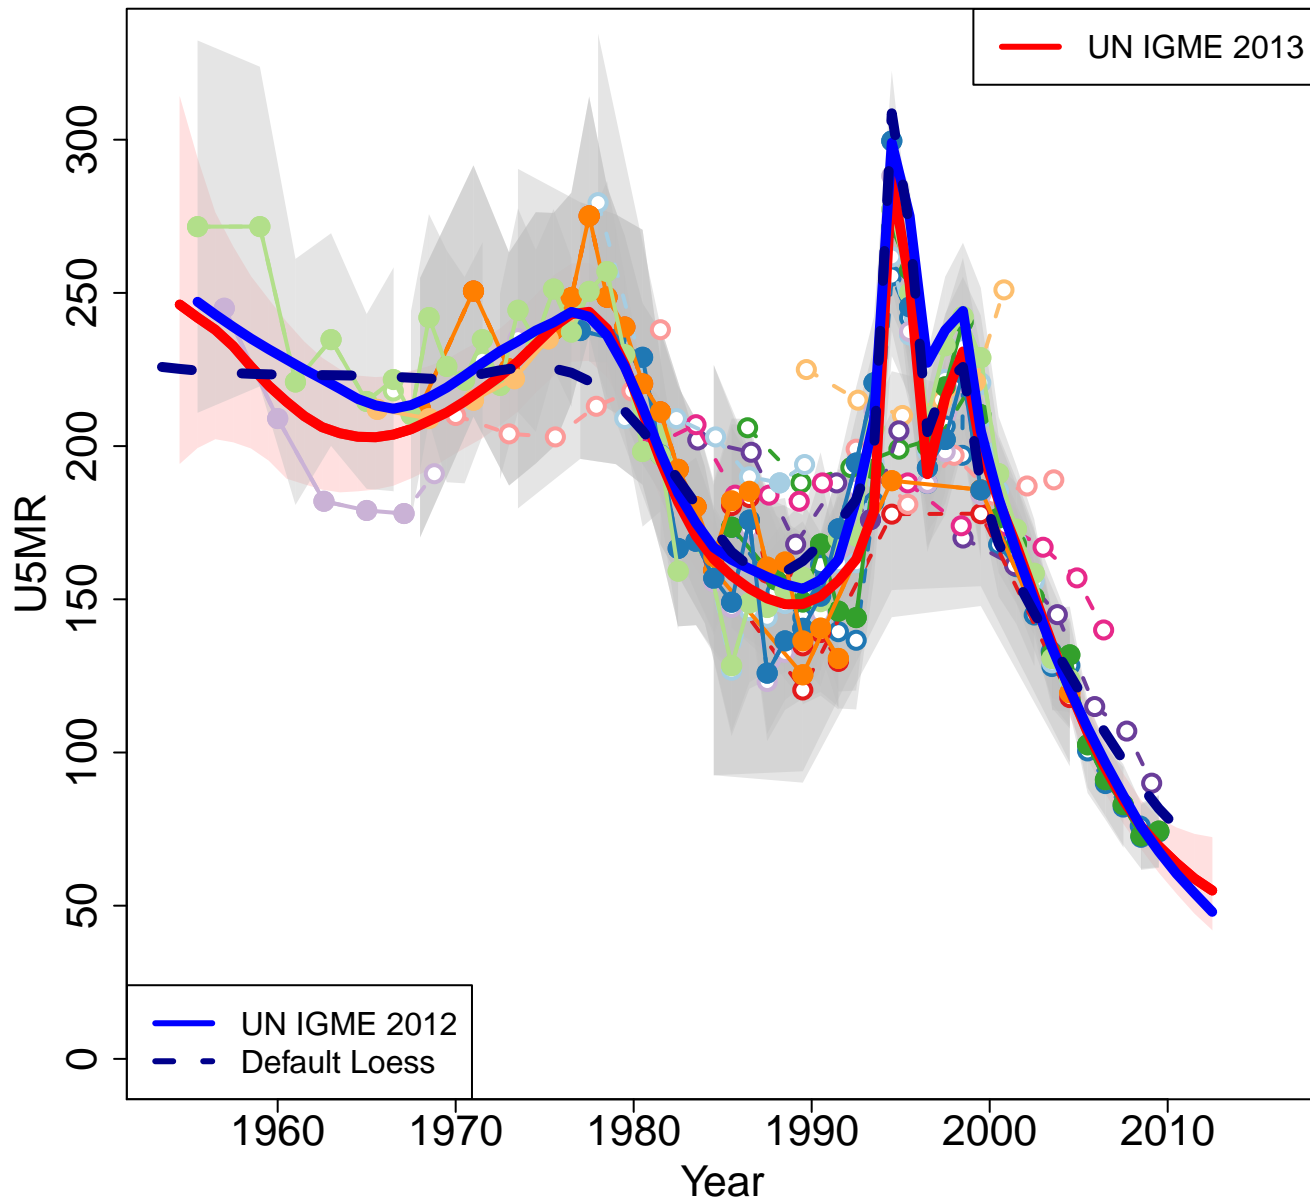

# Zoomed in

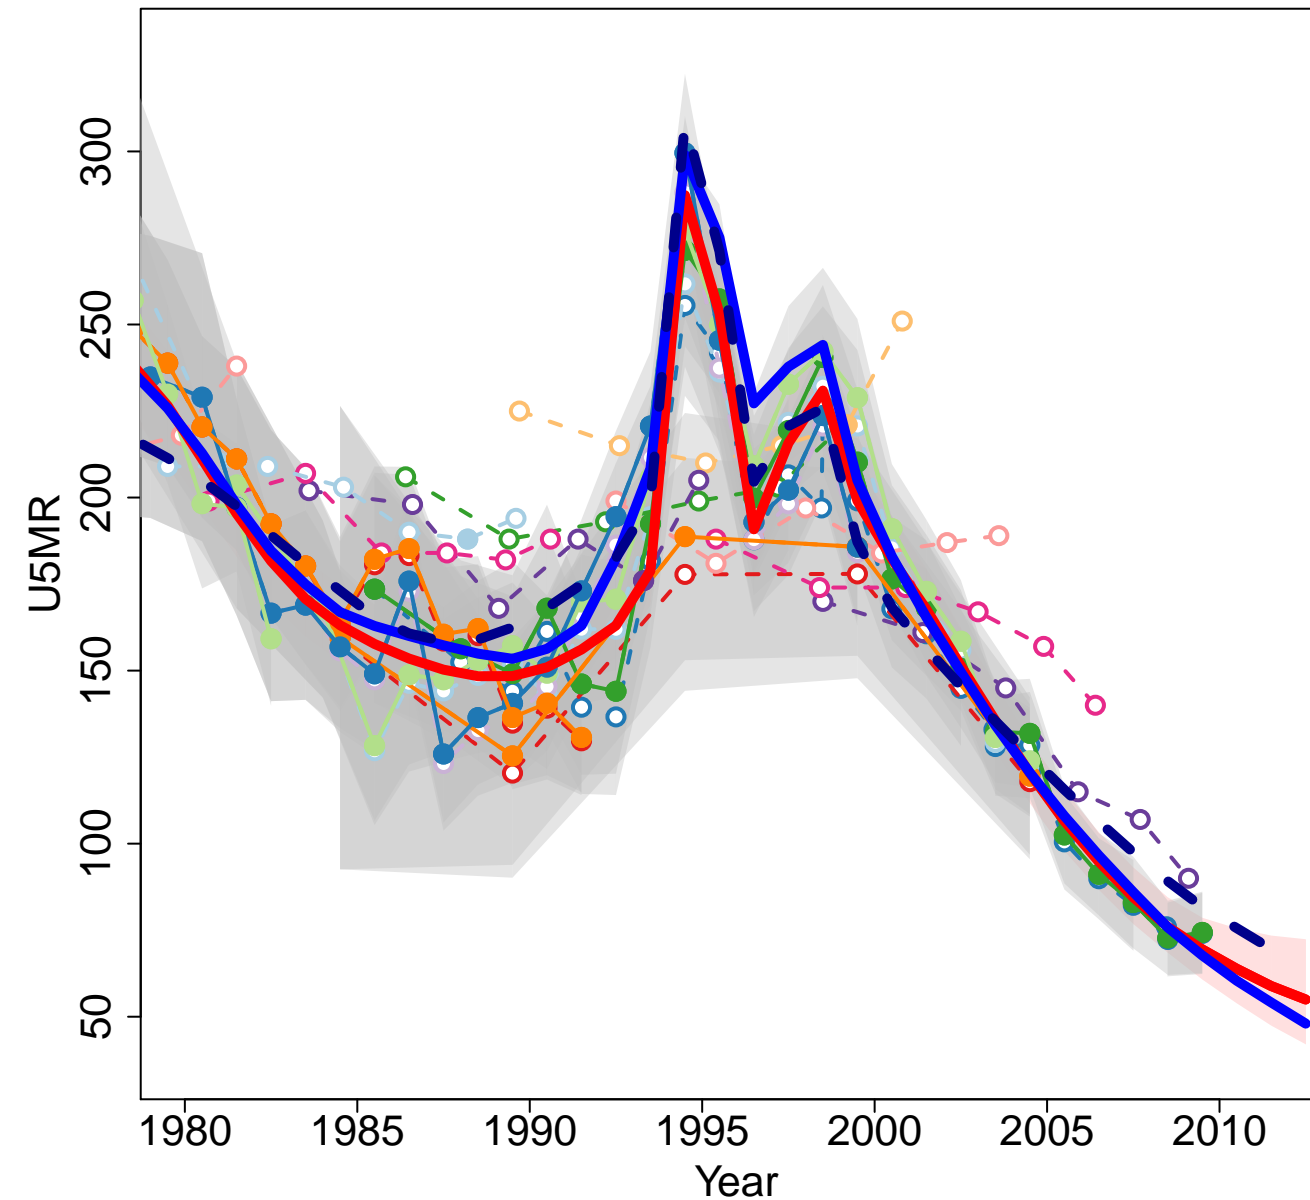

- Demographic Survey 1970 (Others Indirect)
- Census 1978 (Census Indirect)
- World Fertility Survey 1983 (Other DHS Indirect)
- World Fertility Survey 1983 (Other DHS Direct)
- Census 1991 (Census Indirect)
- Demographic and Health Survey 1992 (DHS Indirect)
- Demographic and Health Survey (MM adjusted) 1992 (DHS Direct)
- Demographic and Health Survey 1992 (DHS Direct)
- Socio-demographic Survey 1996 (Others Indirect)
- Demographic and Health Survey 2000 (DHS Indirect)
- Demographic and Health Survey (MM adjusted) 2000 (DHS Direct)
- Demographic and Health Survey 2000 (DHS Direct)
- Census 2002 (Census Indirect)
- Demographic and Health Survey 2005 (DHS Indirect)
- Demographic and Health Survey (MM adjusted) 2005 (DHS Direct)
- Demographic and Health Survey 2005 (DHS Direct)
- Demographic and Health Survey Adjusted by adding 20 points 2007–2008 (Other DHS Indirect)
- Interim Demographic and Health Survey (MM adjusted) 2007–2008 (Other DHS Direct)
- Interim Demographic and Health Survey 2007–2008 (Other DHS Direct)
- Demographic and Health Survey 2010–2011 (DHS Indirect)
- Demographic and Health Survey (MM adjusted) 2010–2011 (DHS Direct)
- Demographic and Health Survey 2010–2011 (DHS Direct)

# South Africa

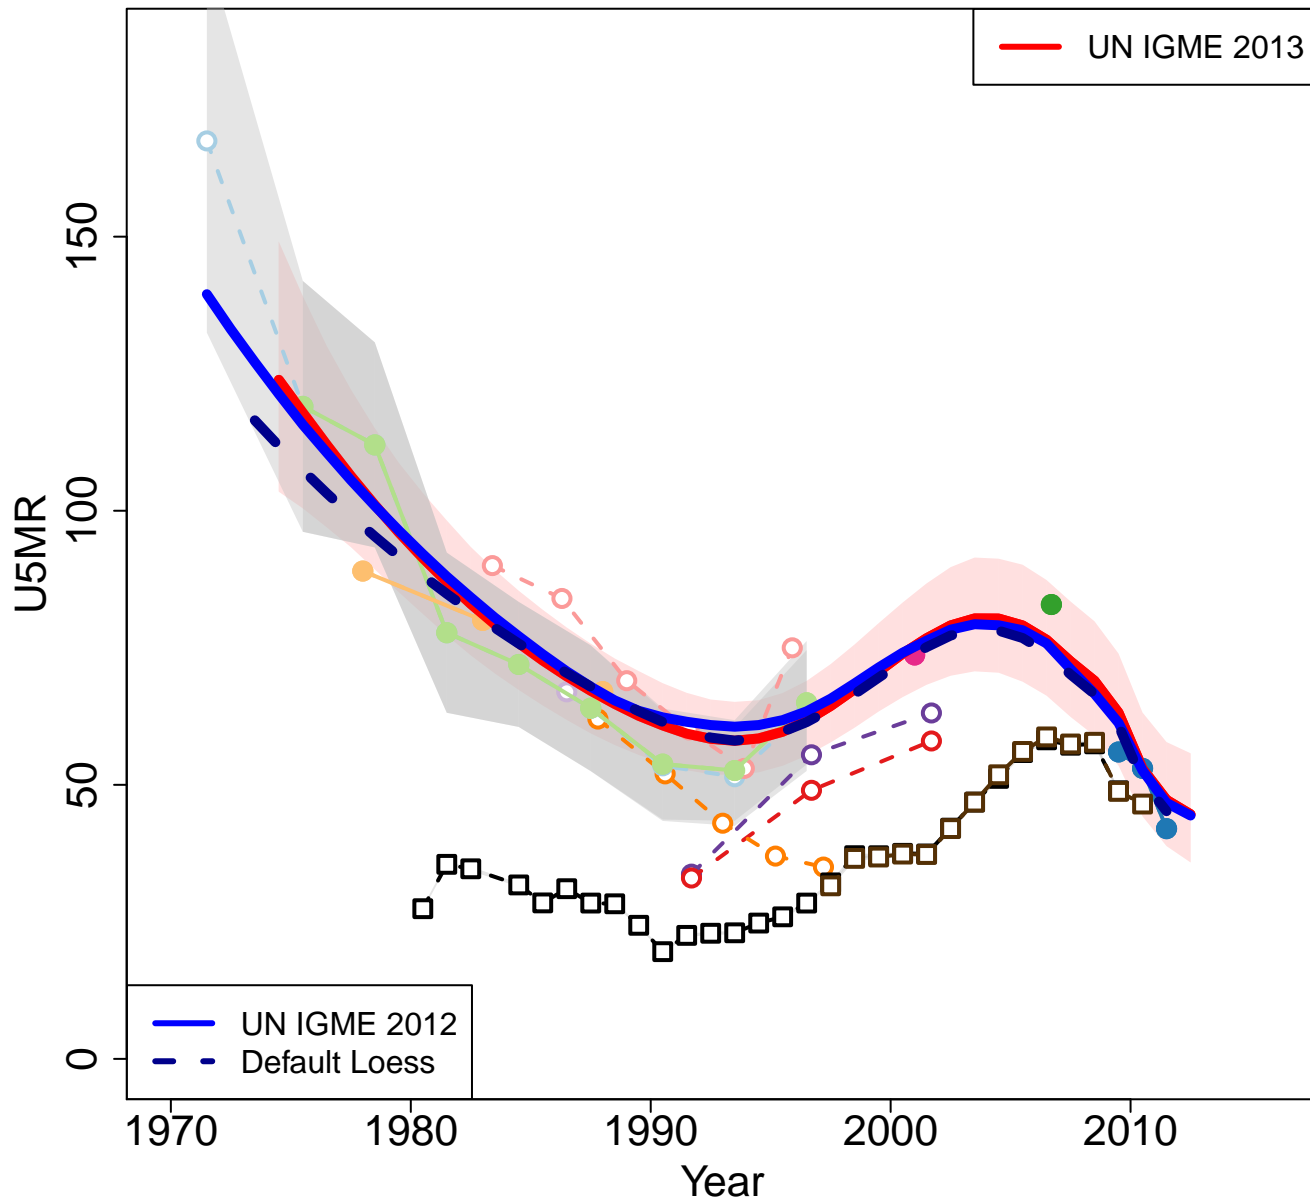

# Zoomed in

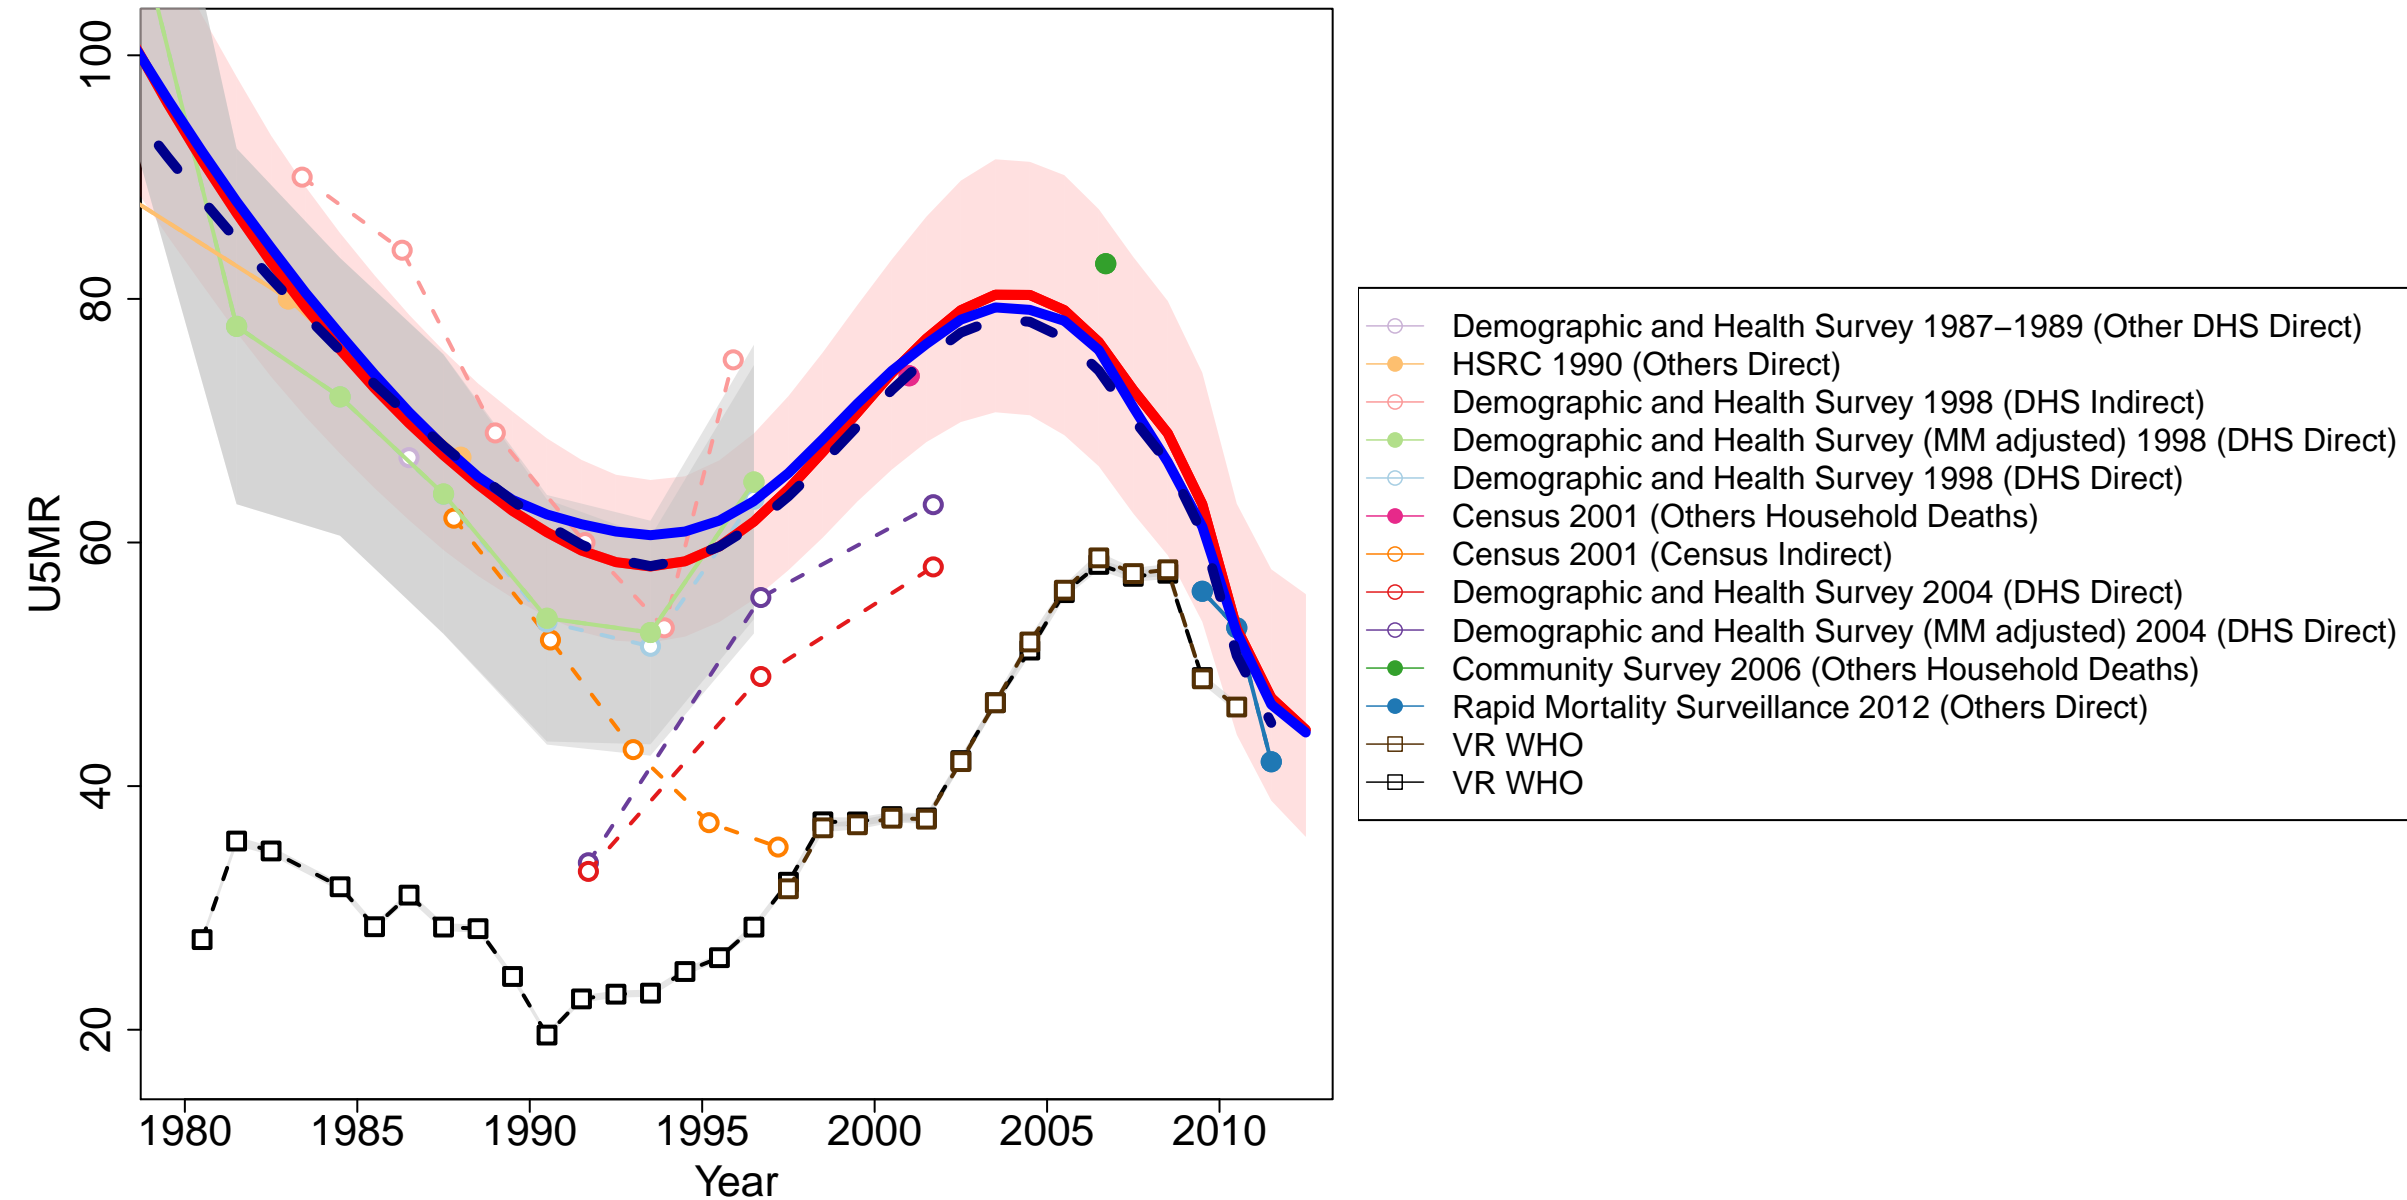

# Swaziland

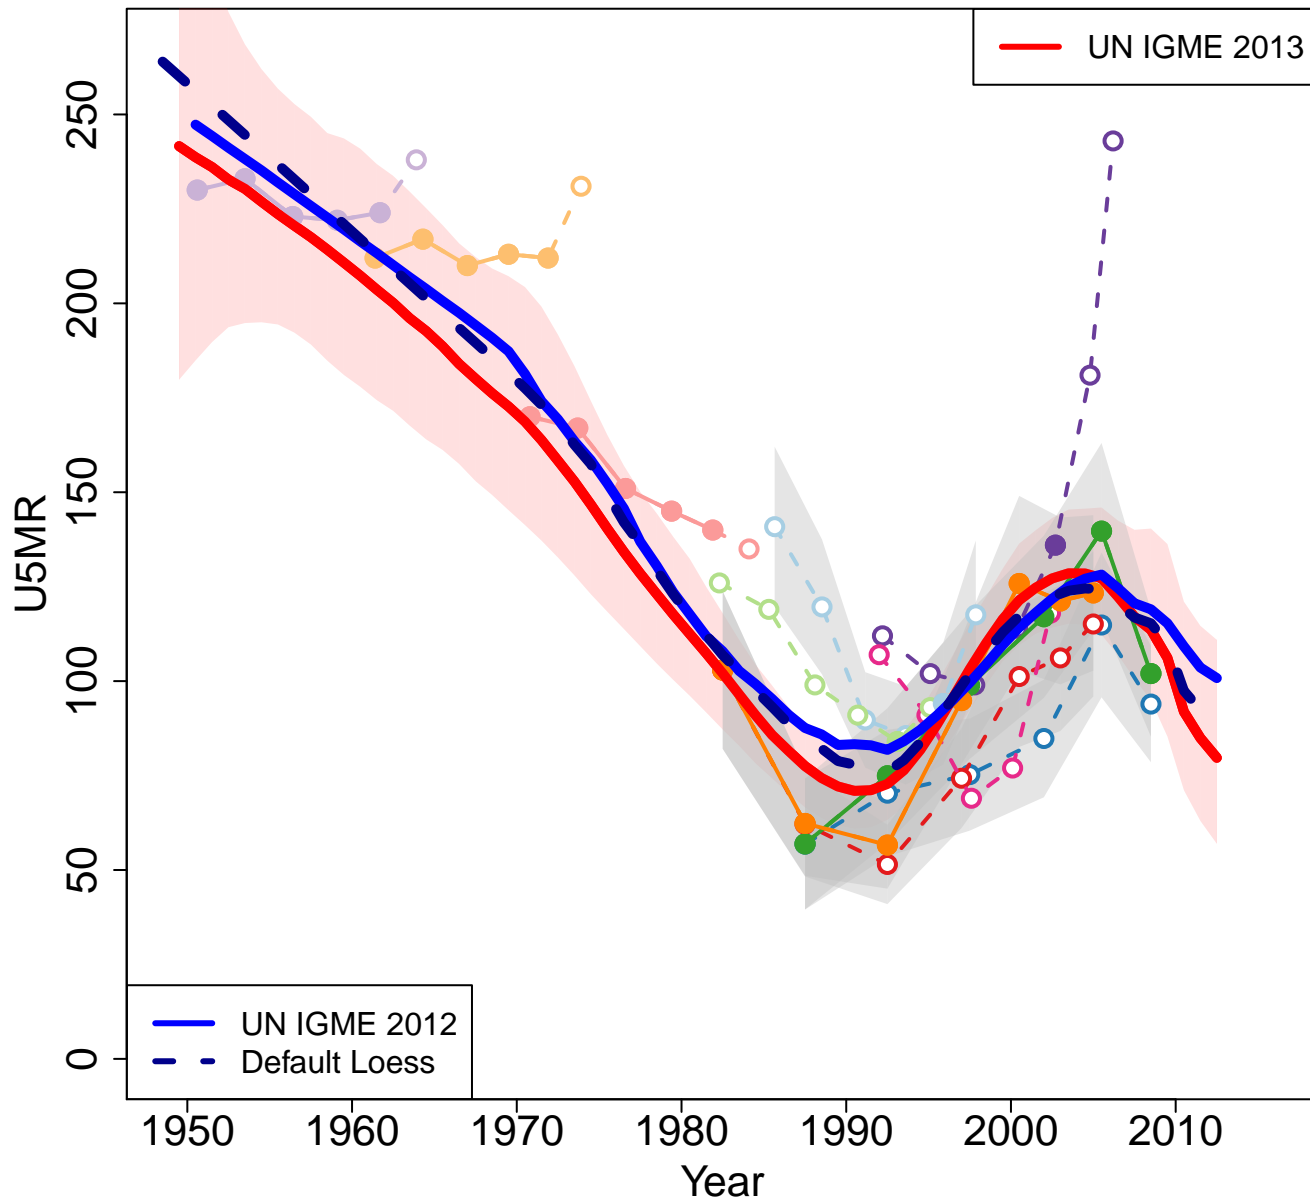

# Zoomed in

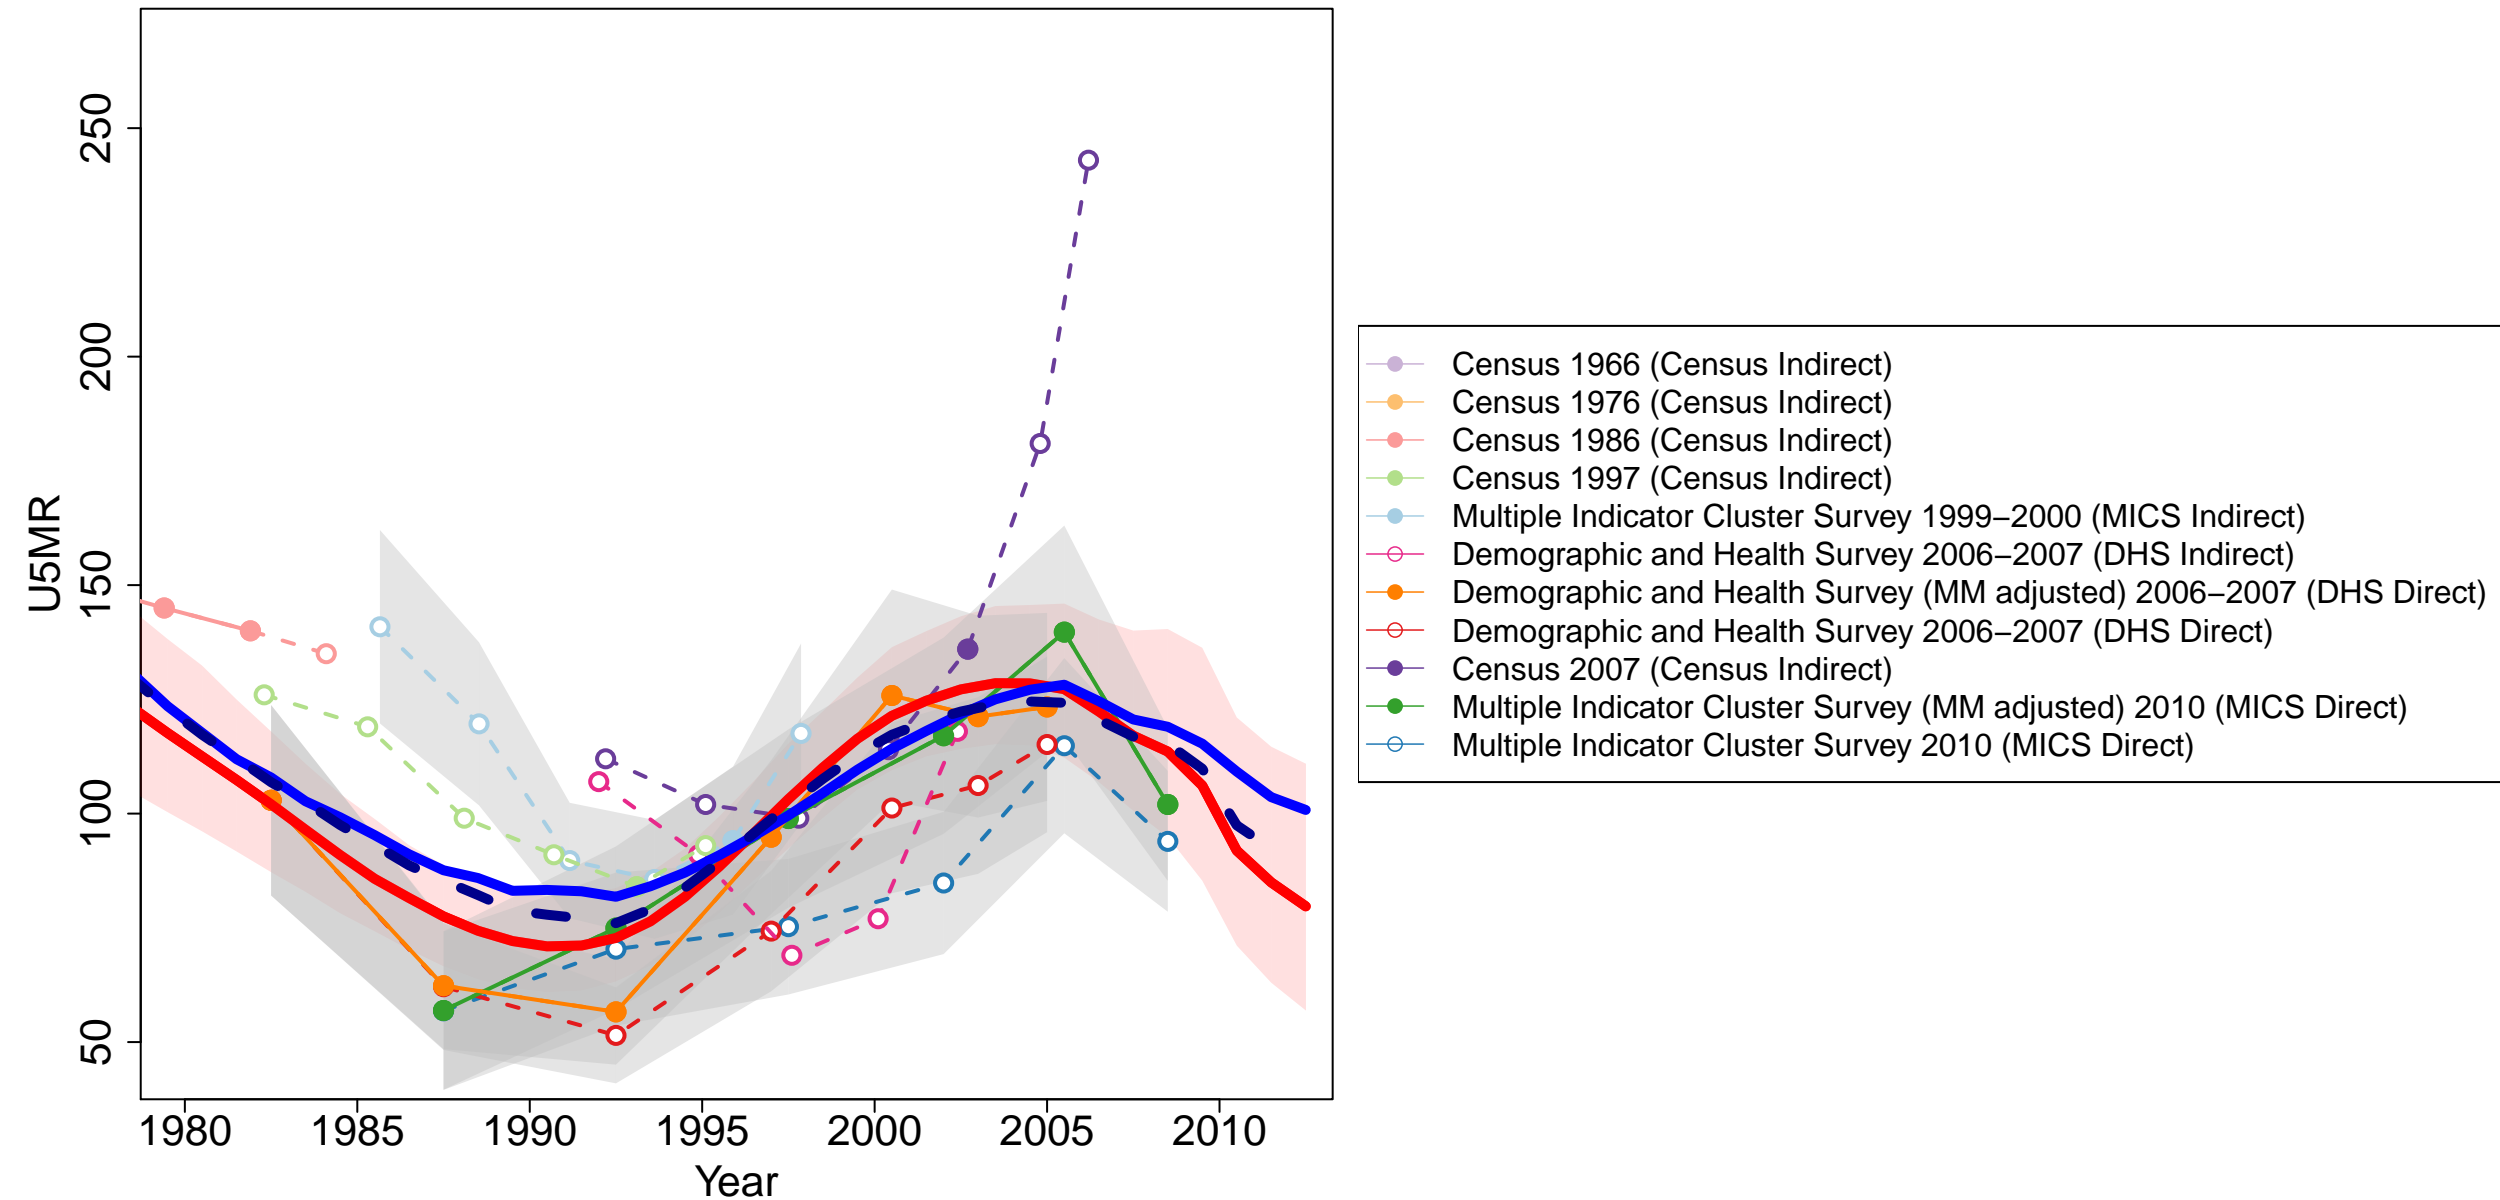



# Uganda

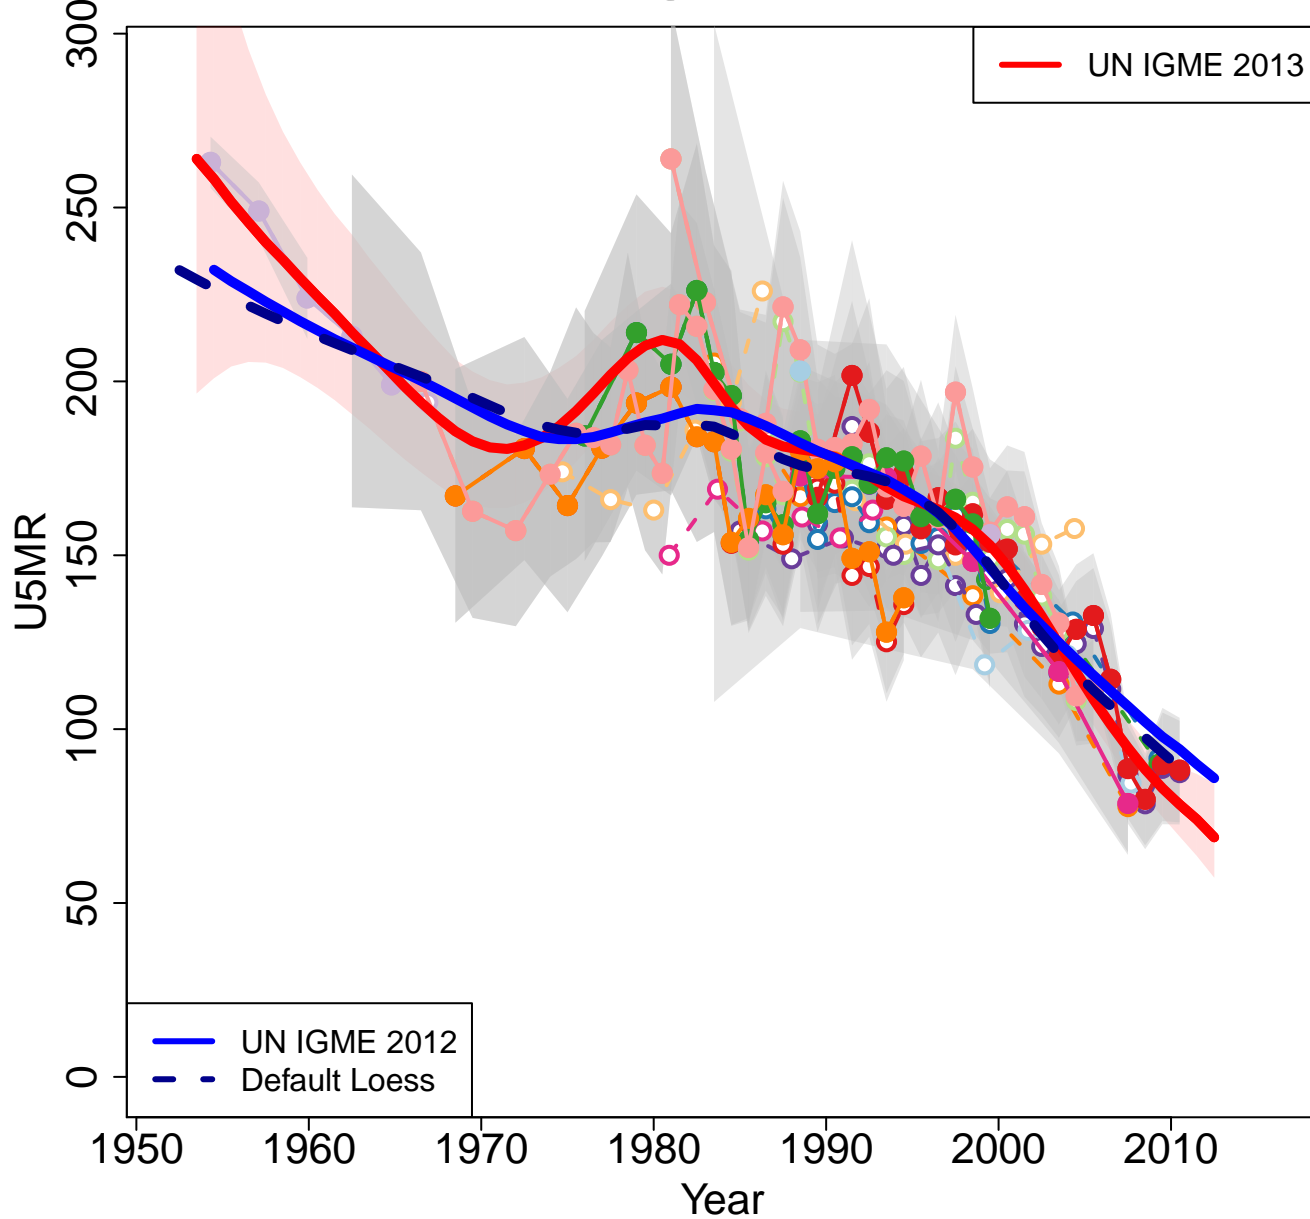

# Zoomed in

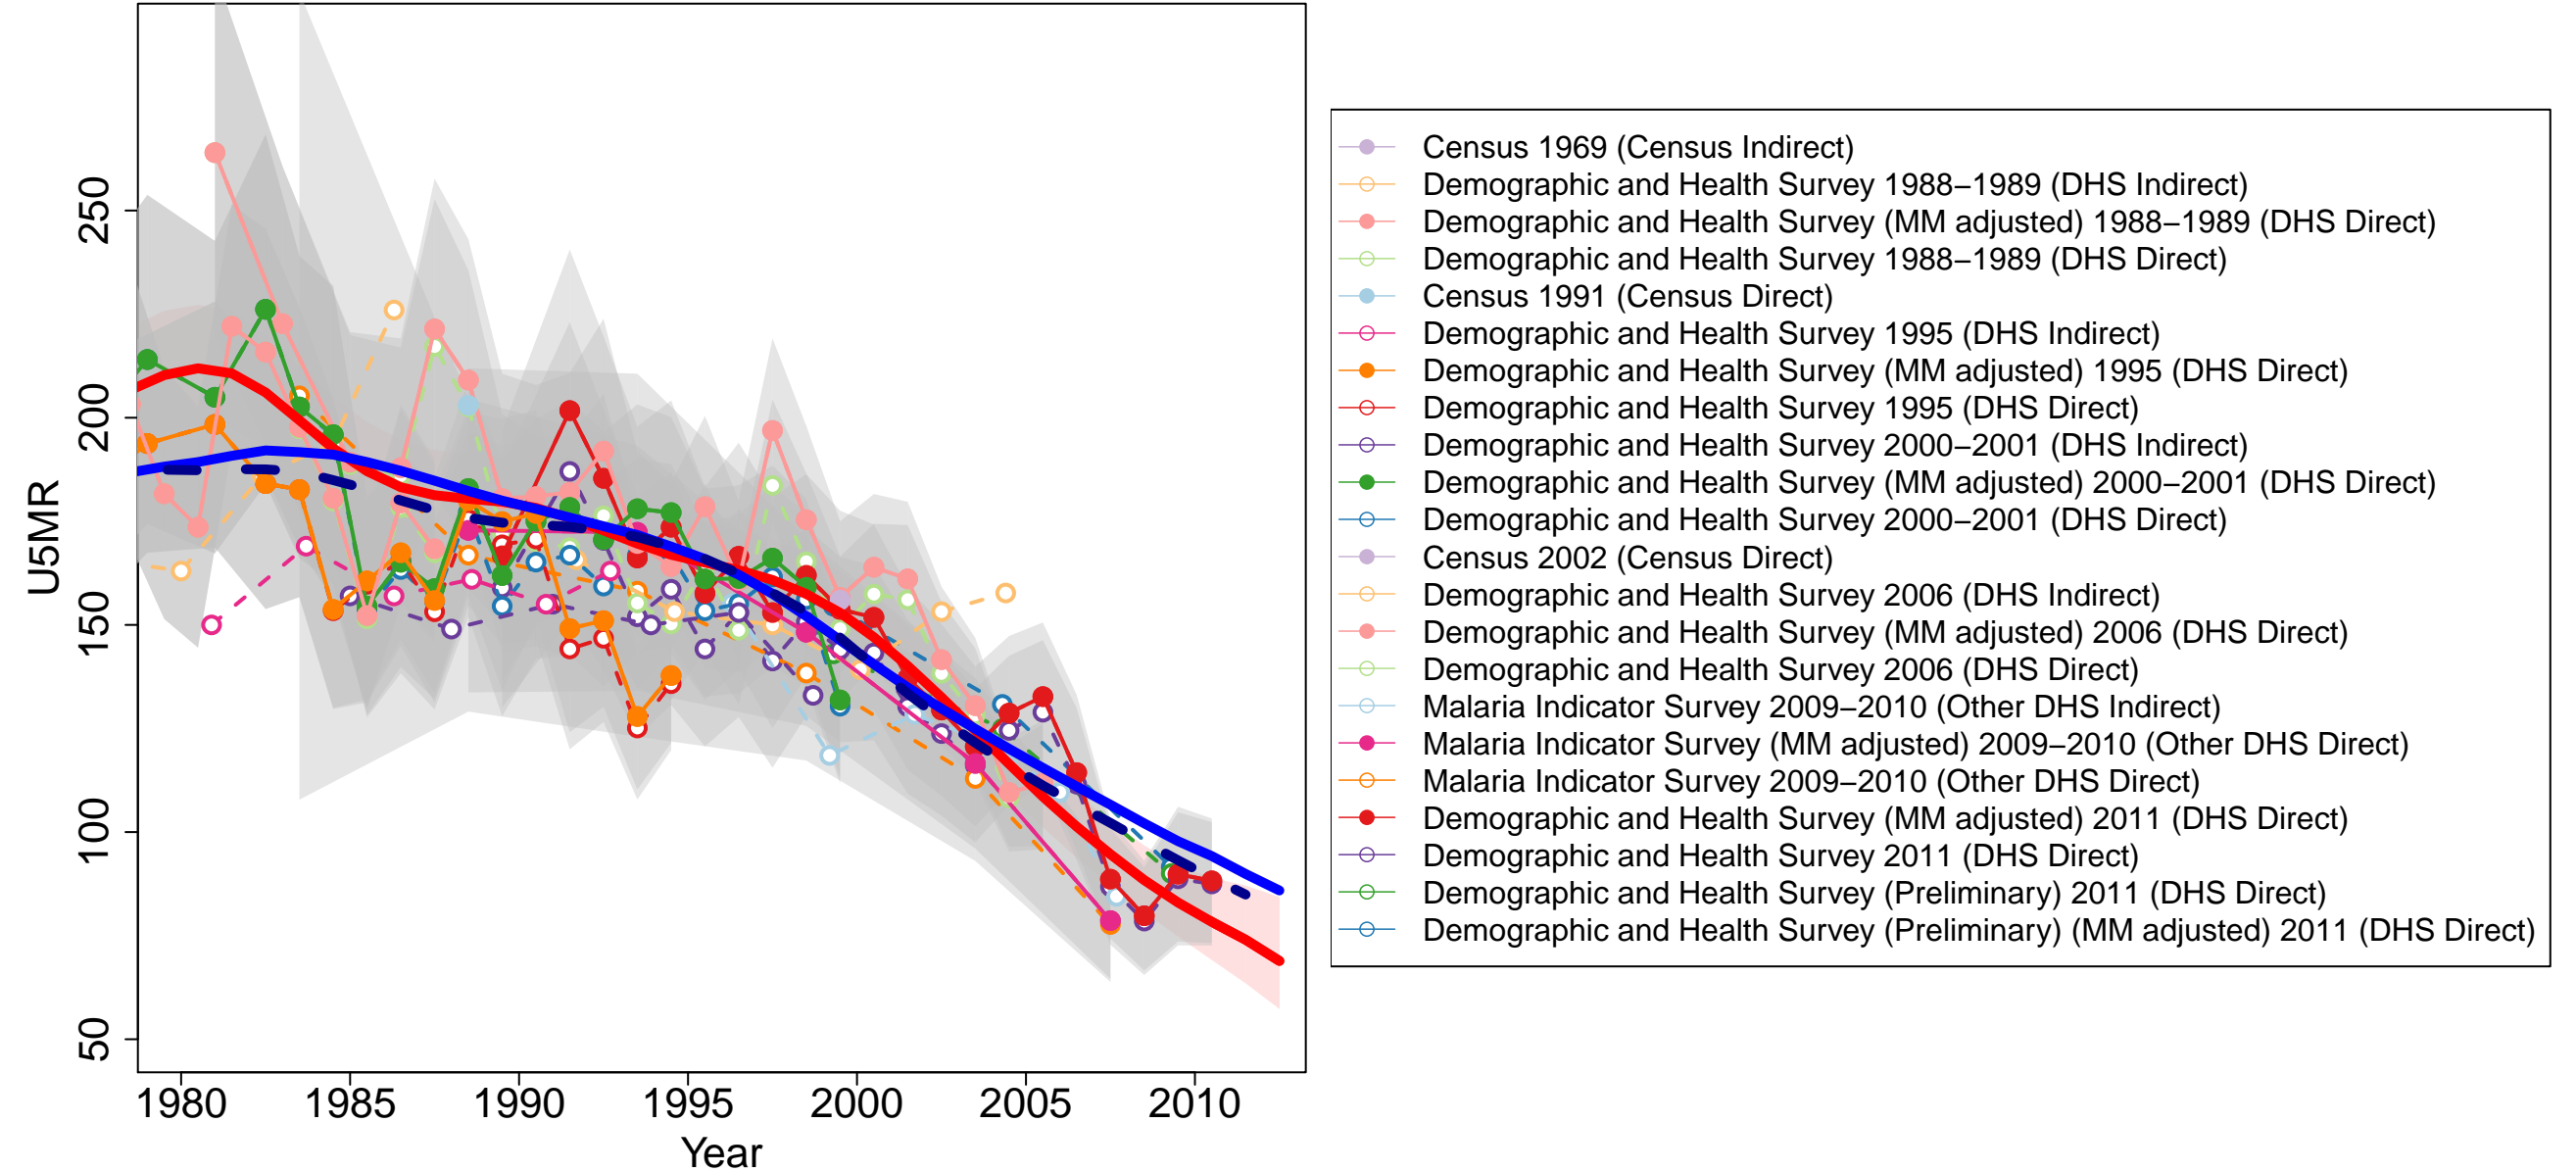

# Tanzania

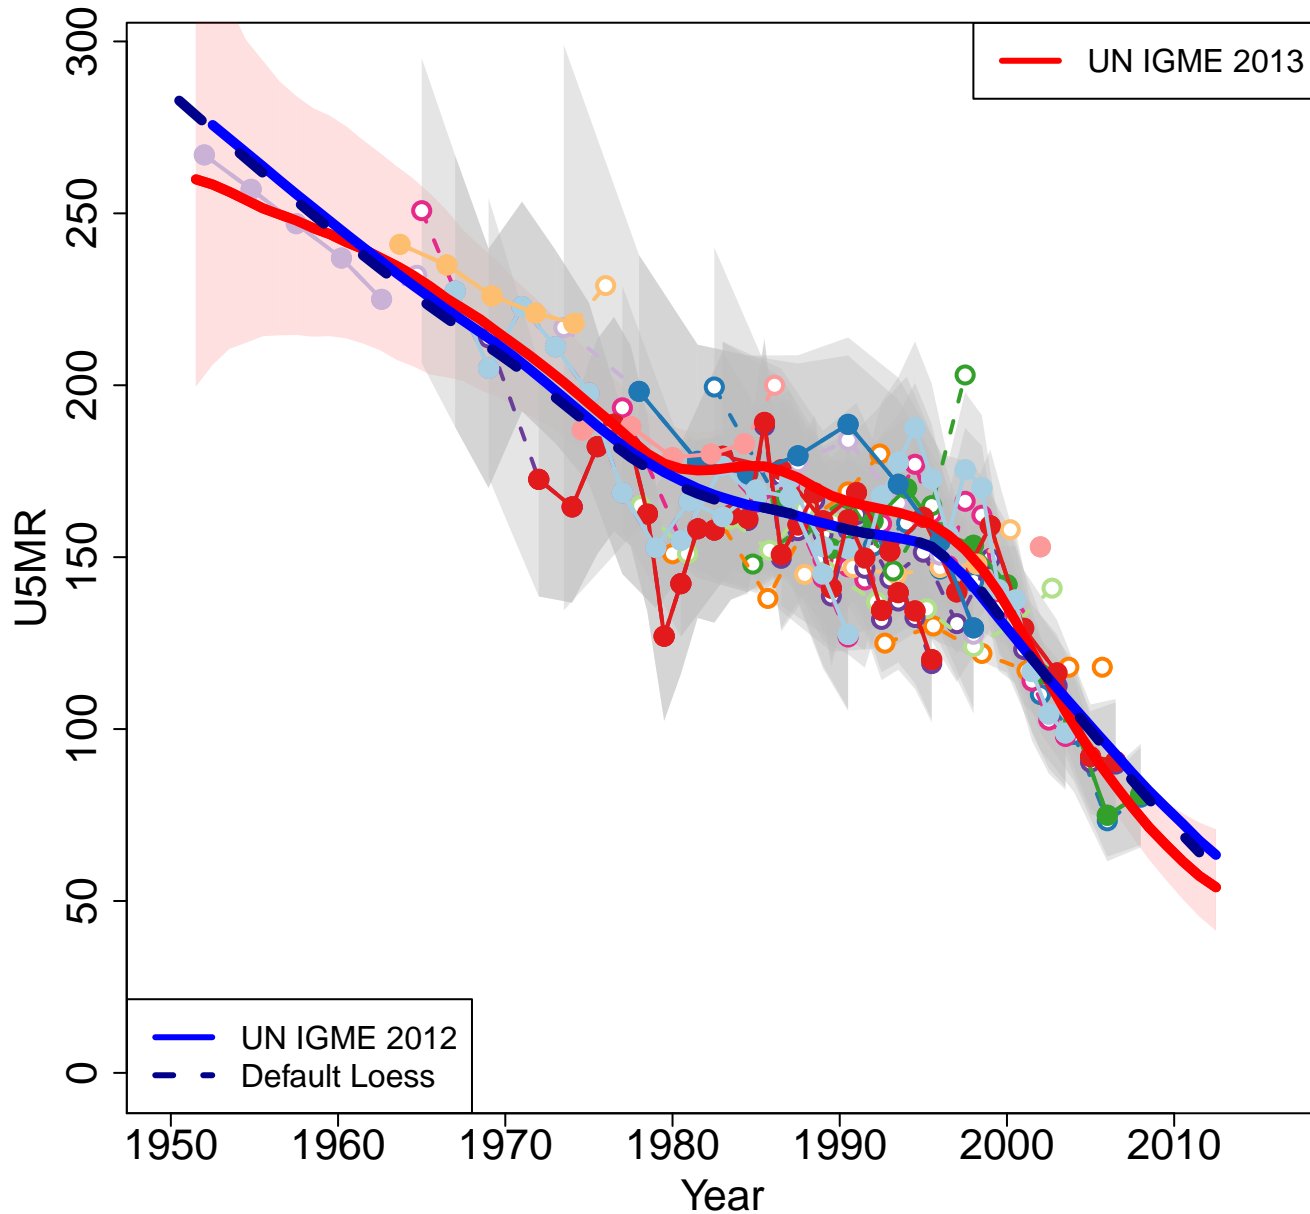

# Zoomed in

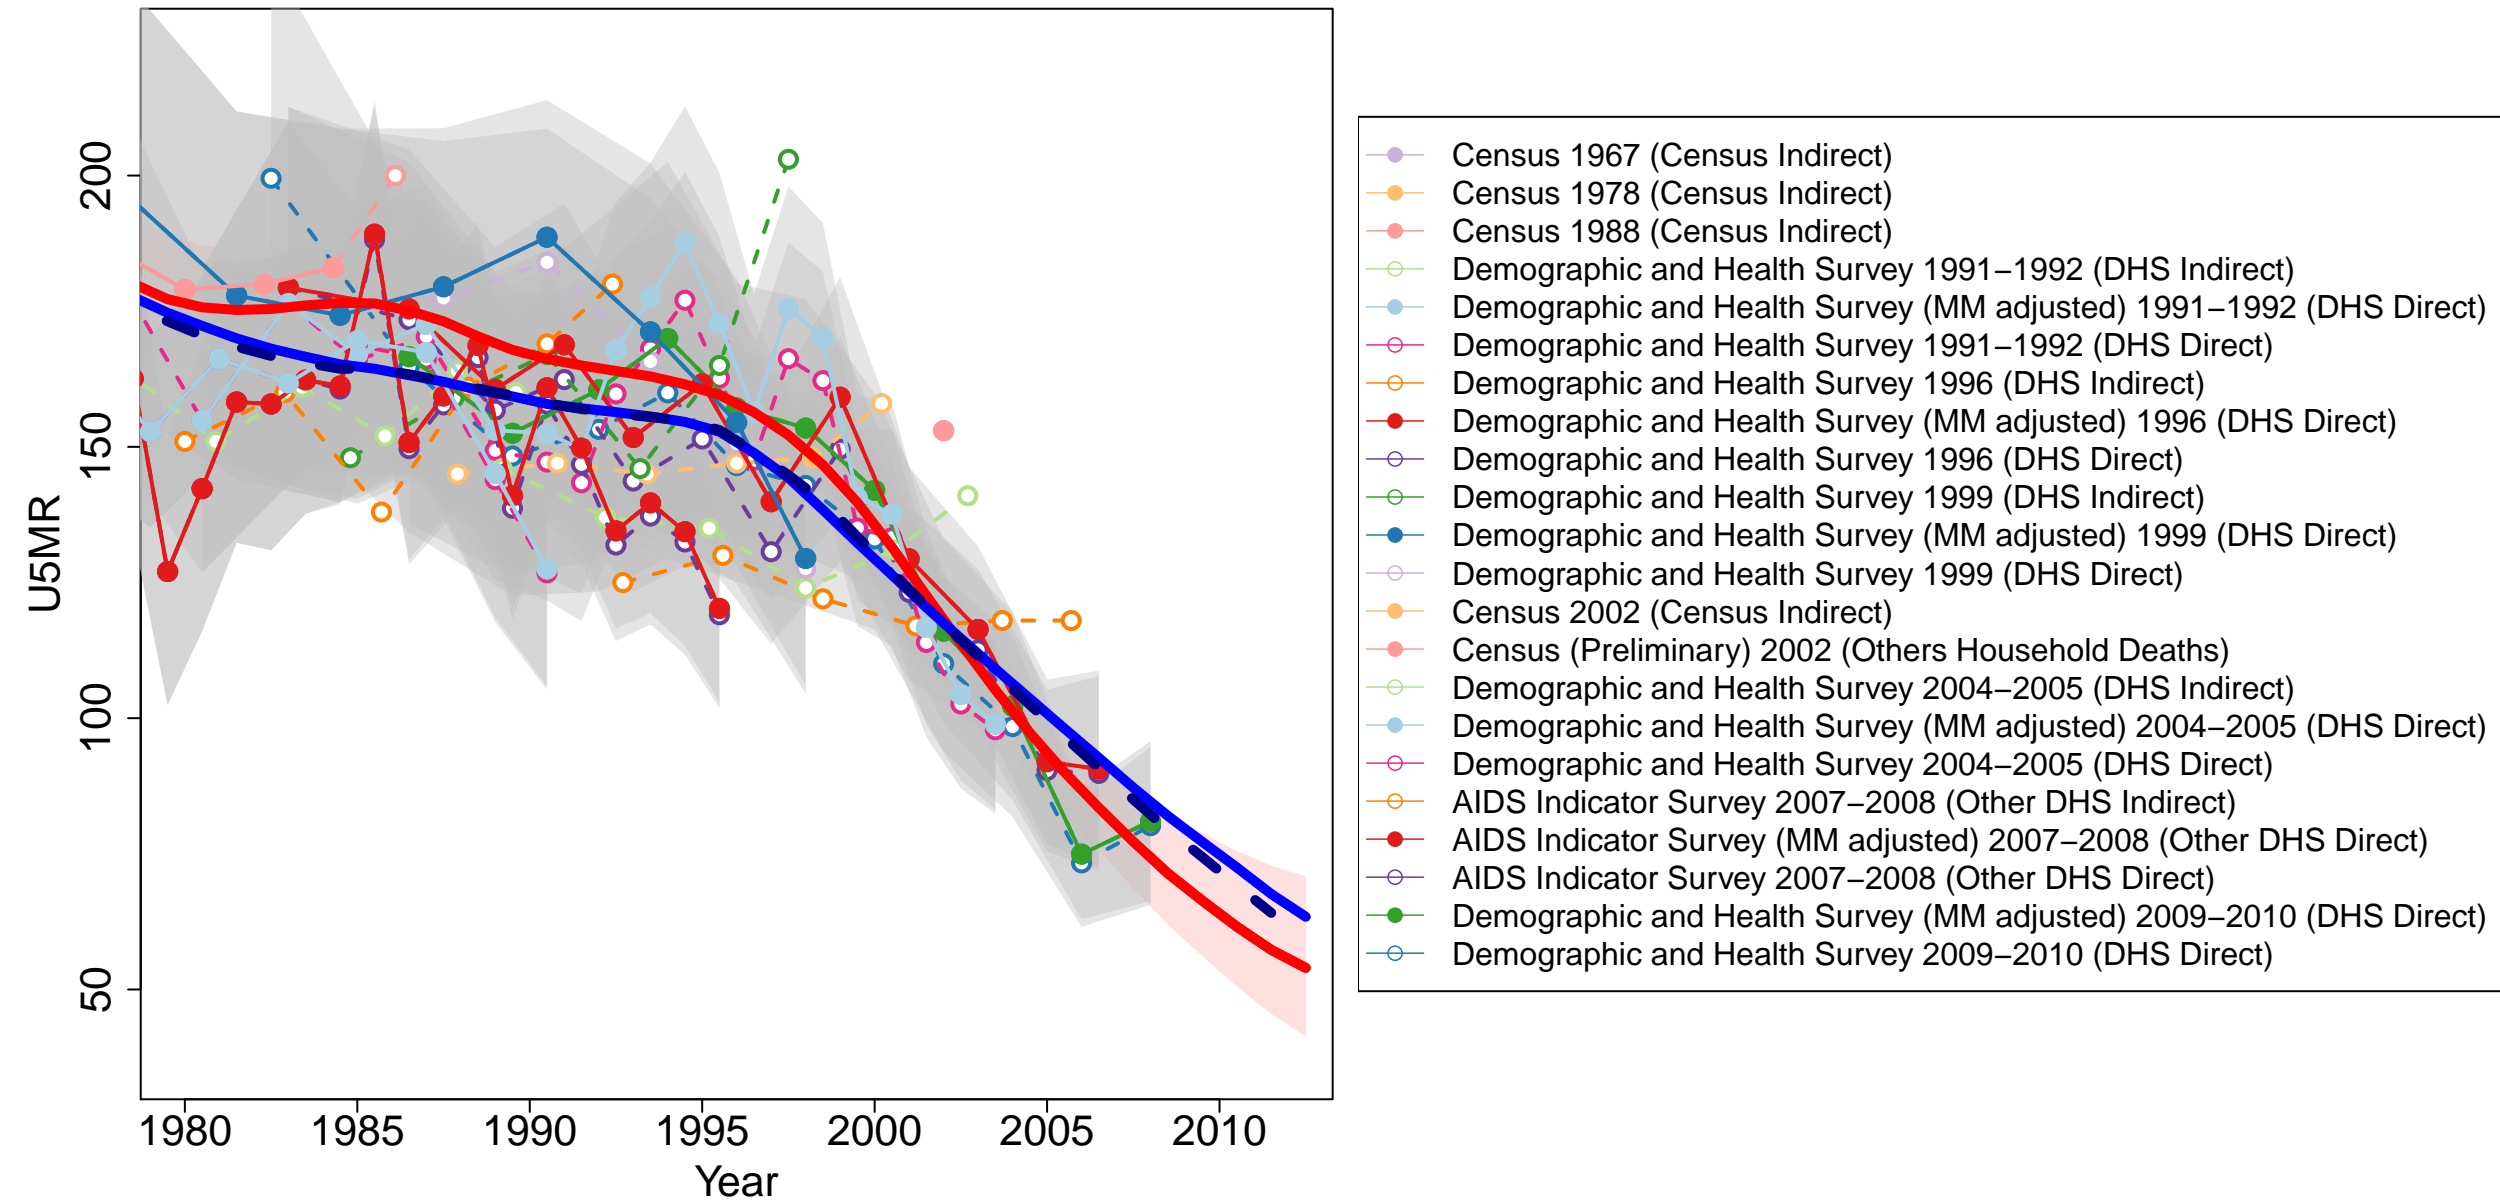

# Zambia

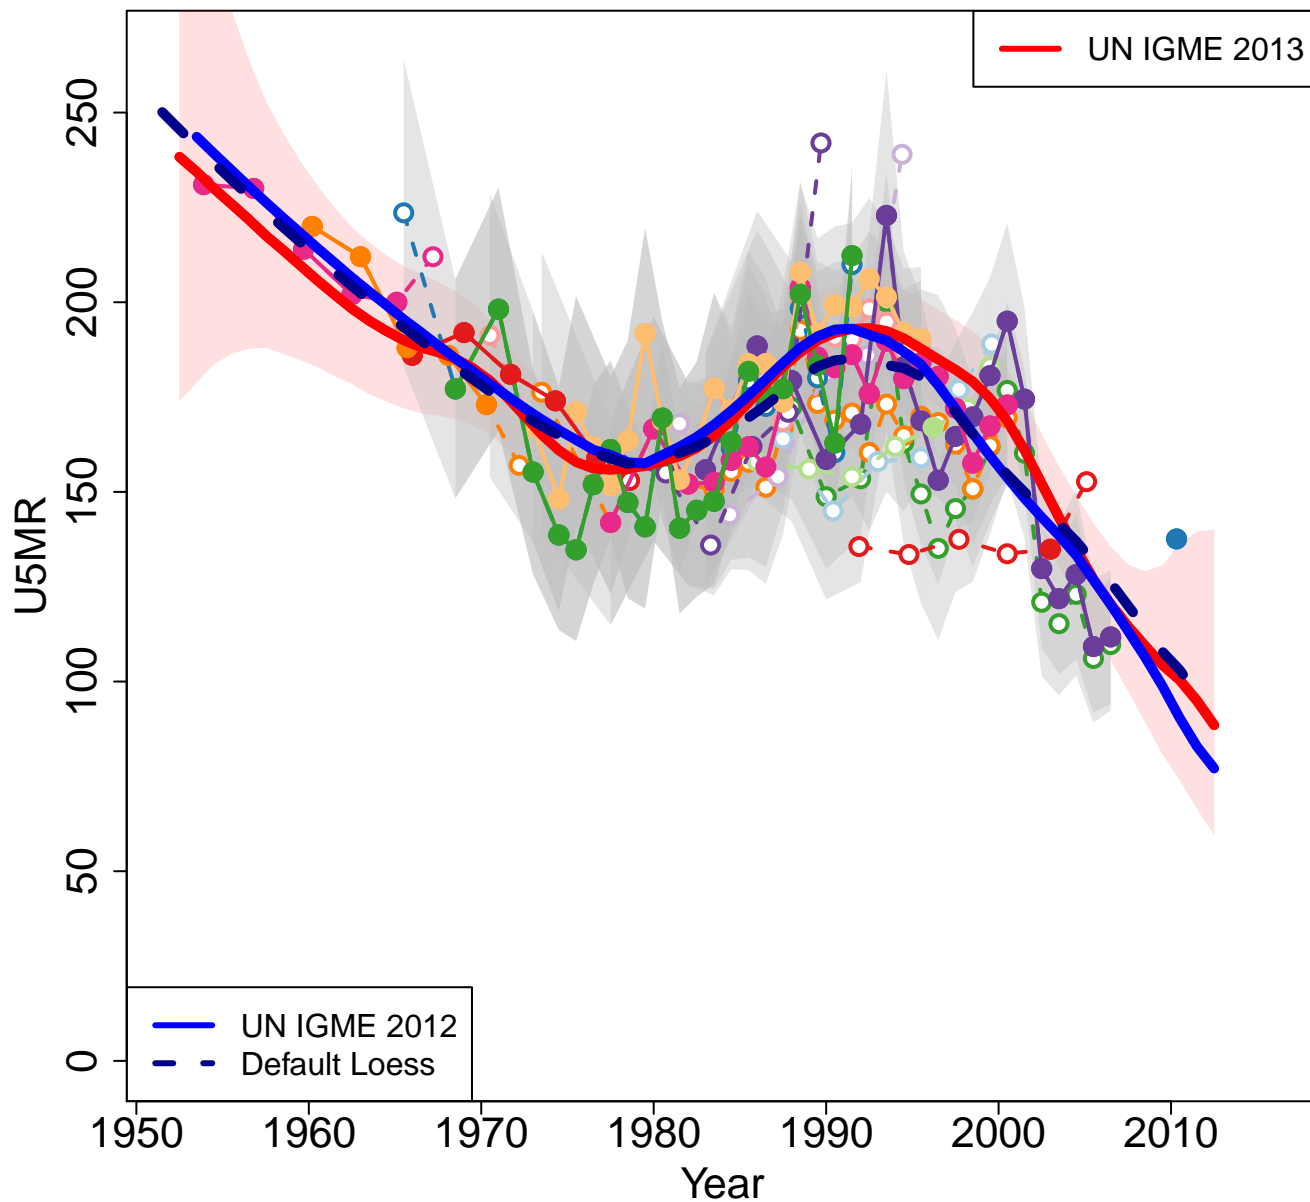

# Zoomed in

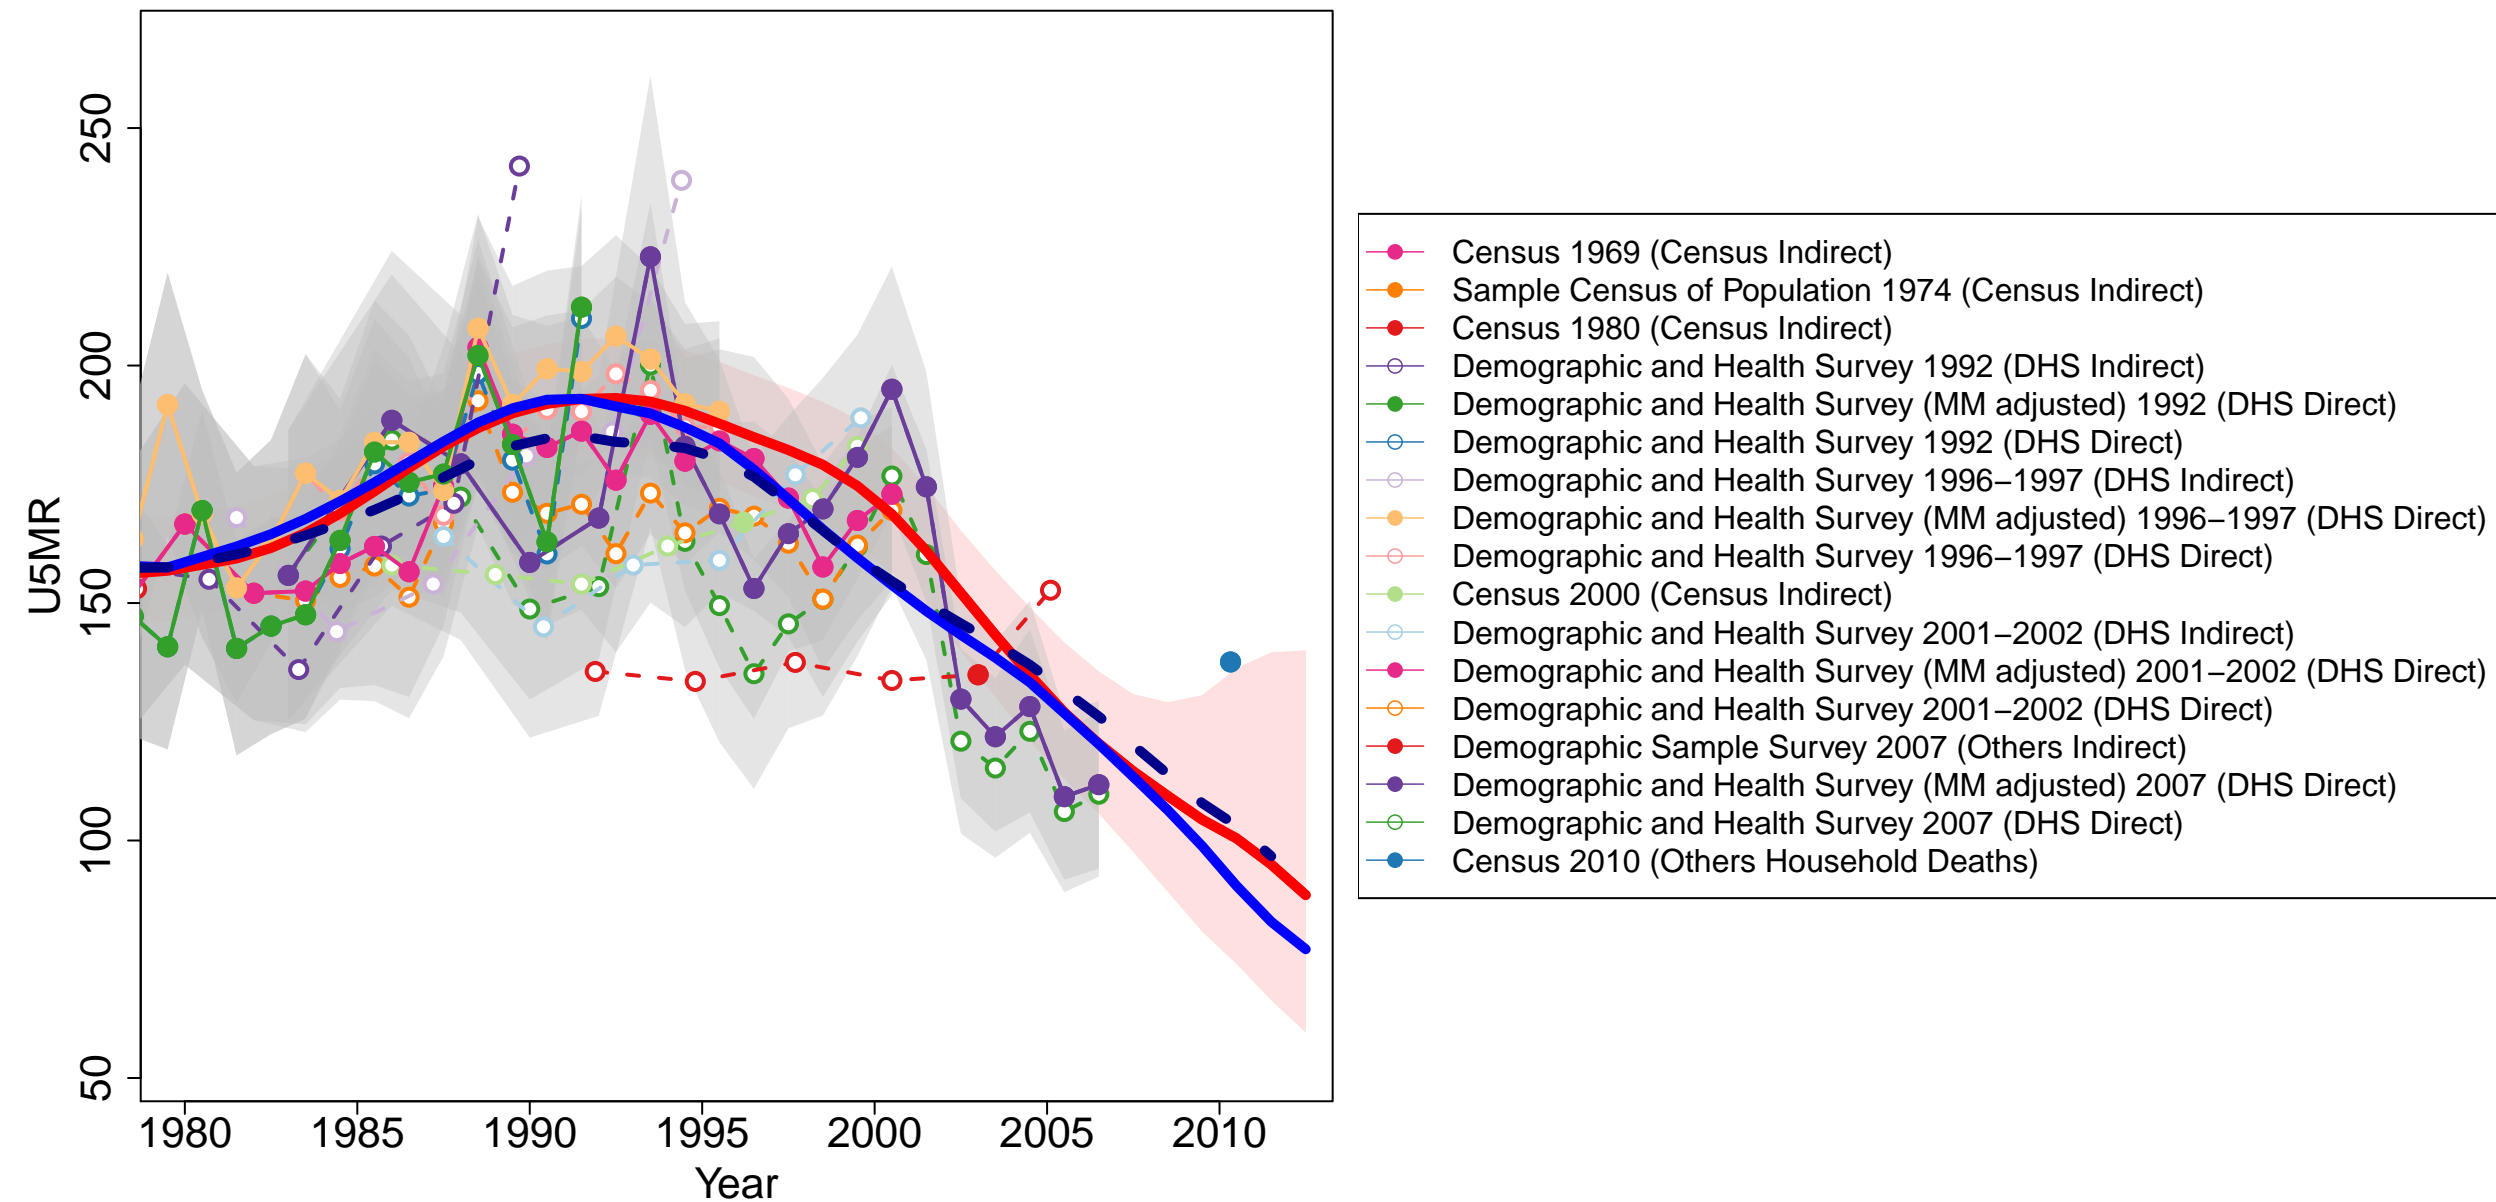

# Zimbabwe

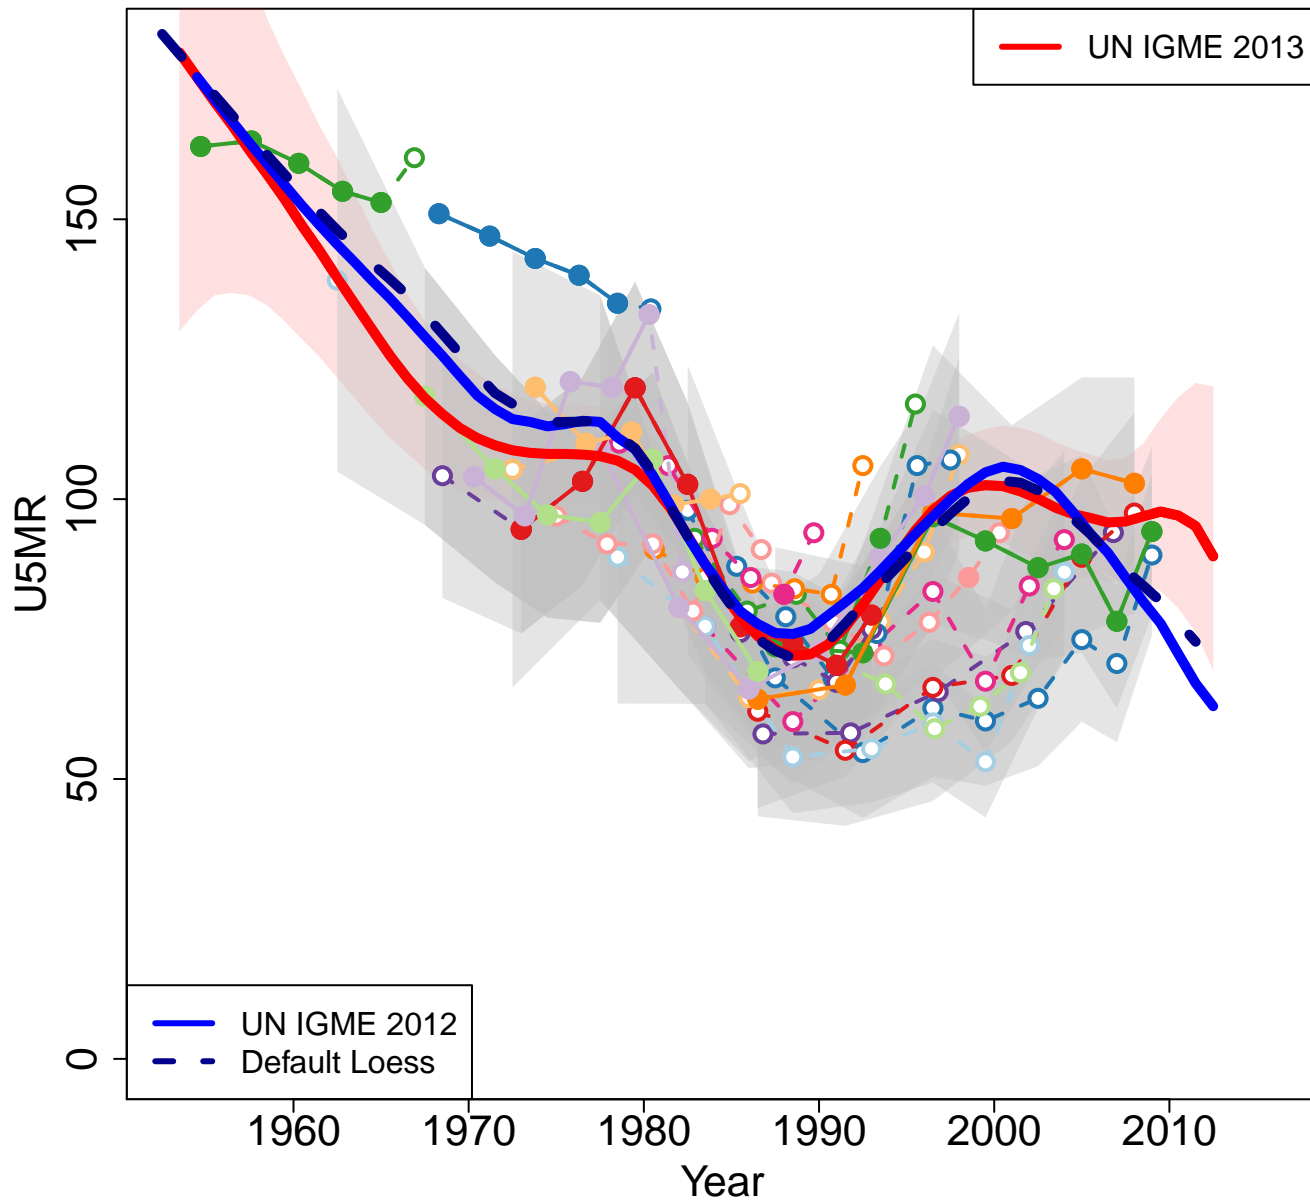

# Zoomed in

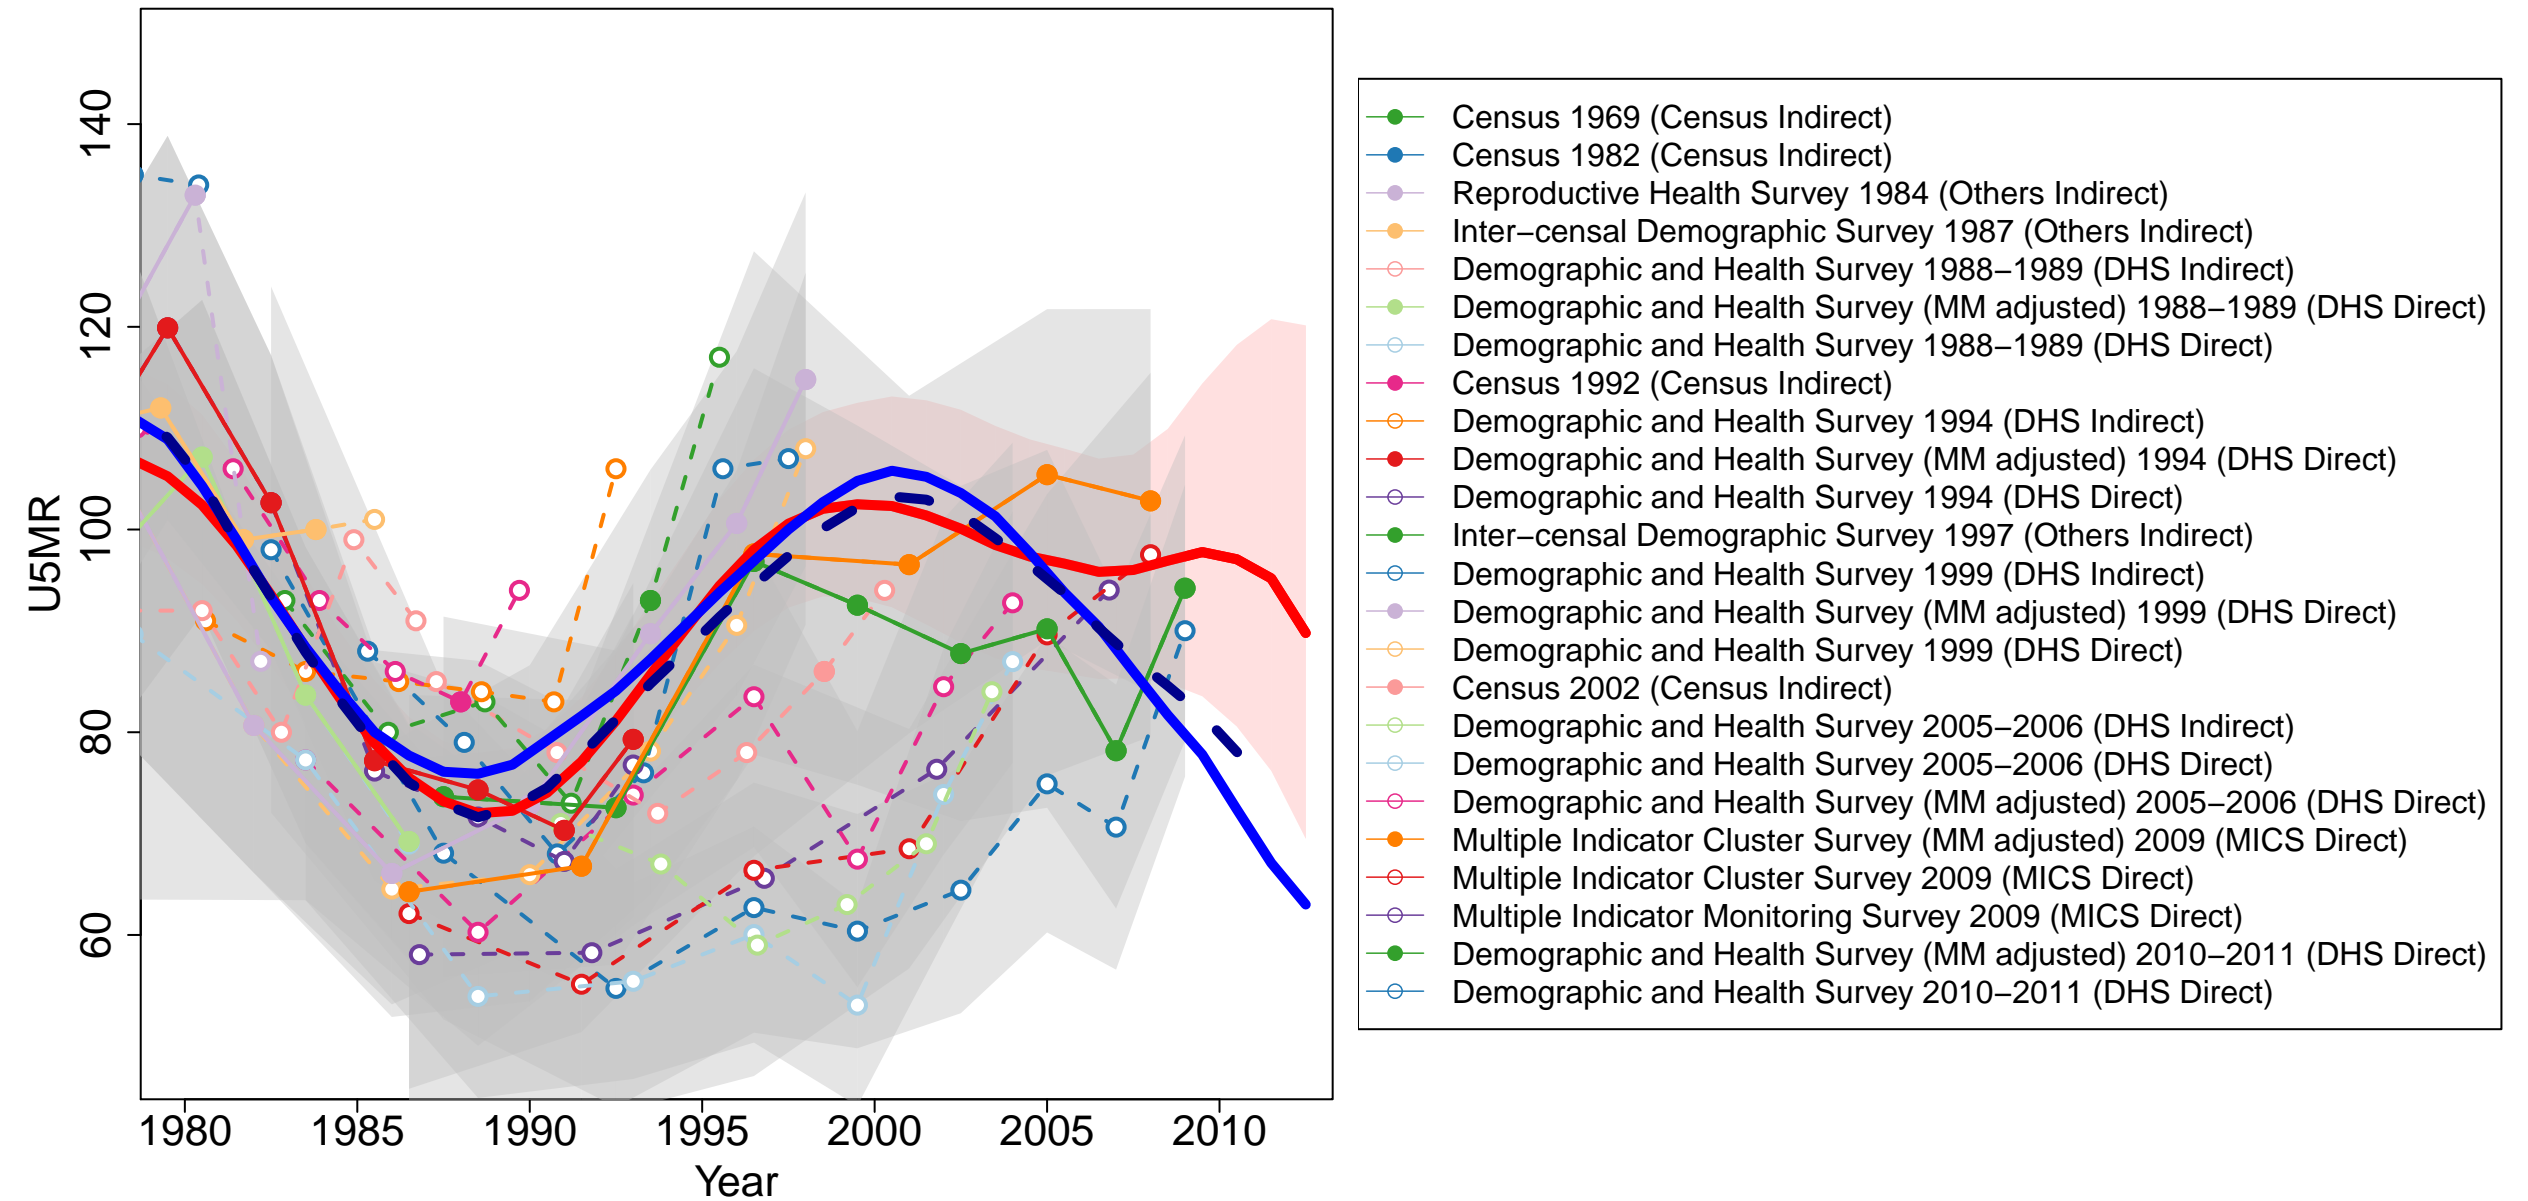



# Congo DR

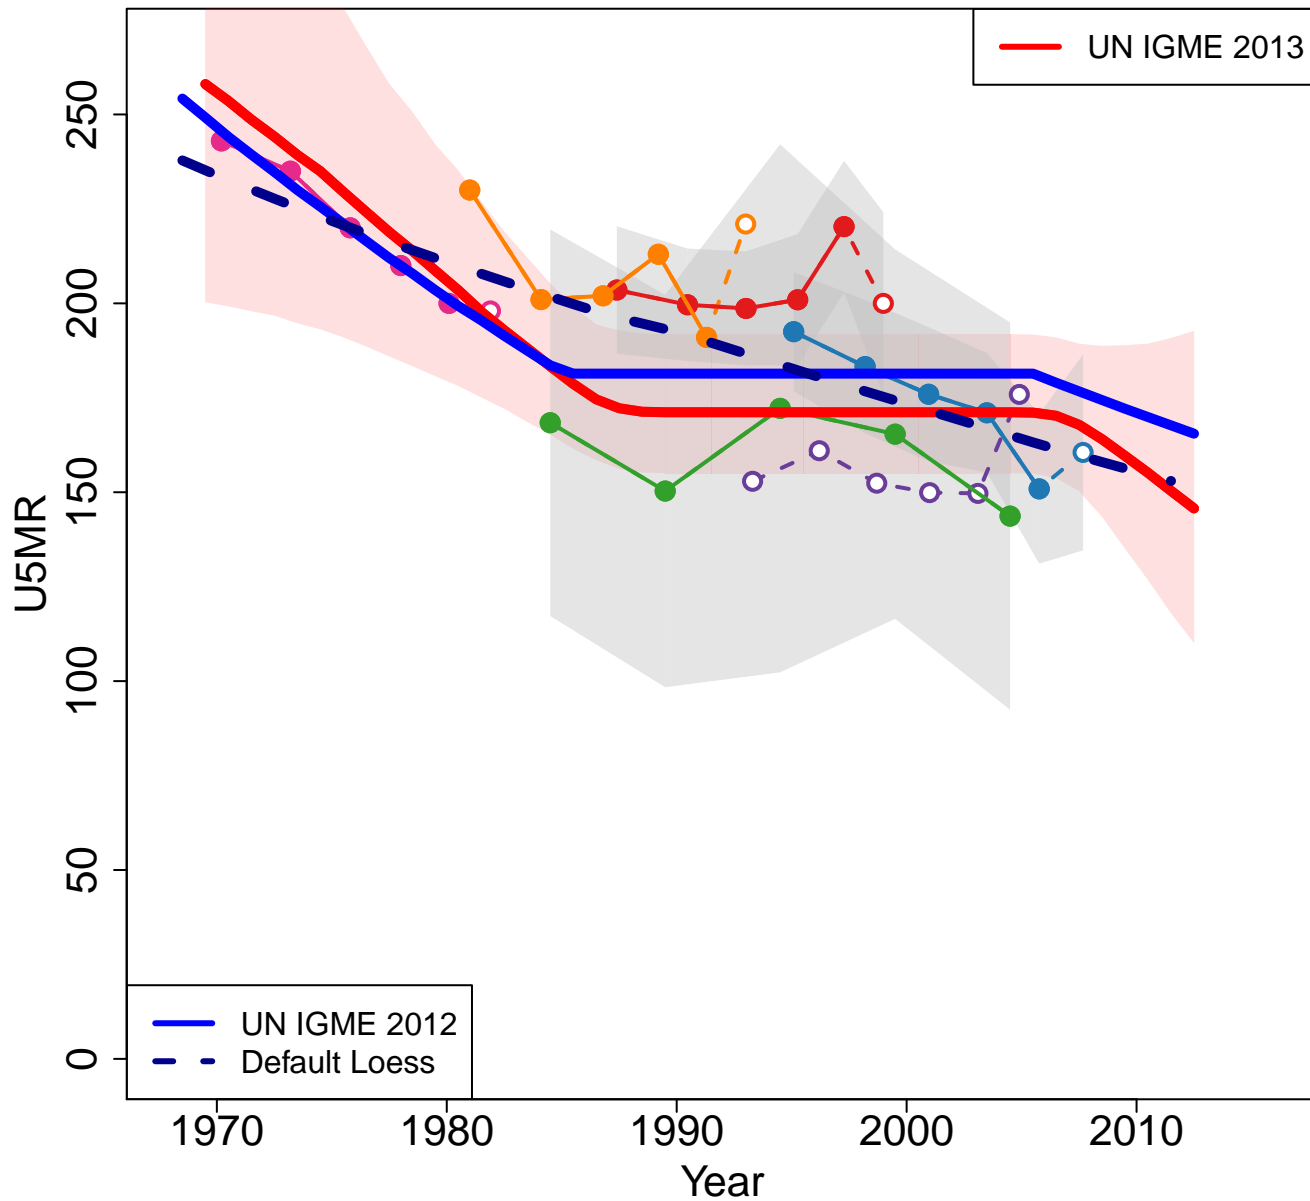

# Zoomed in

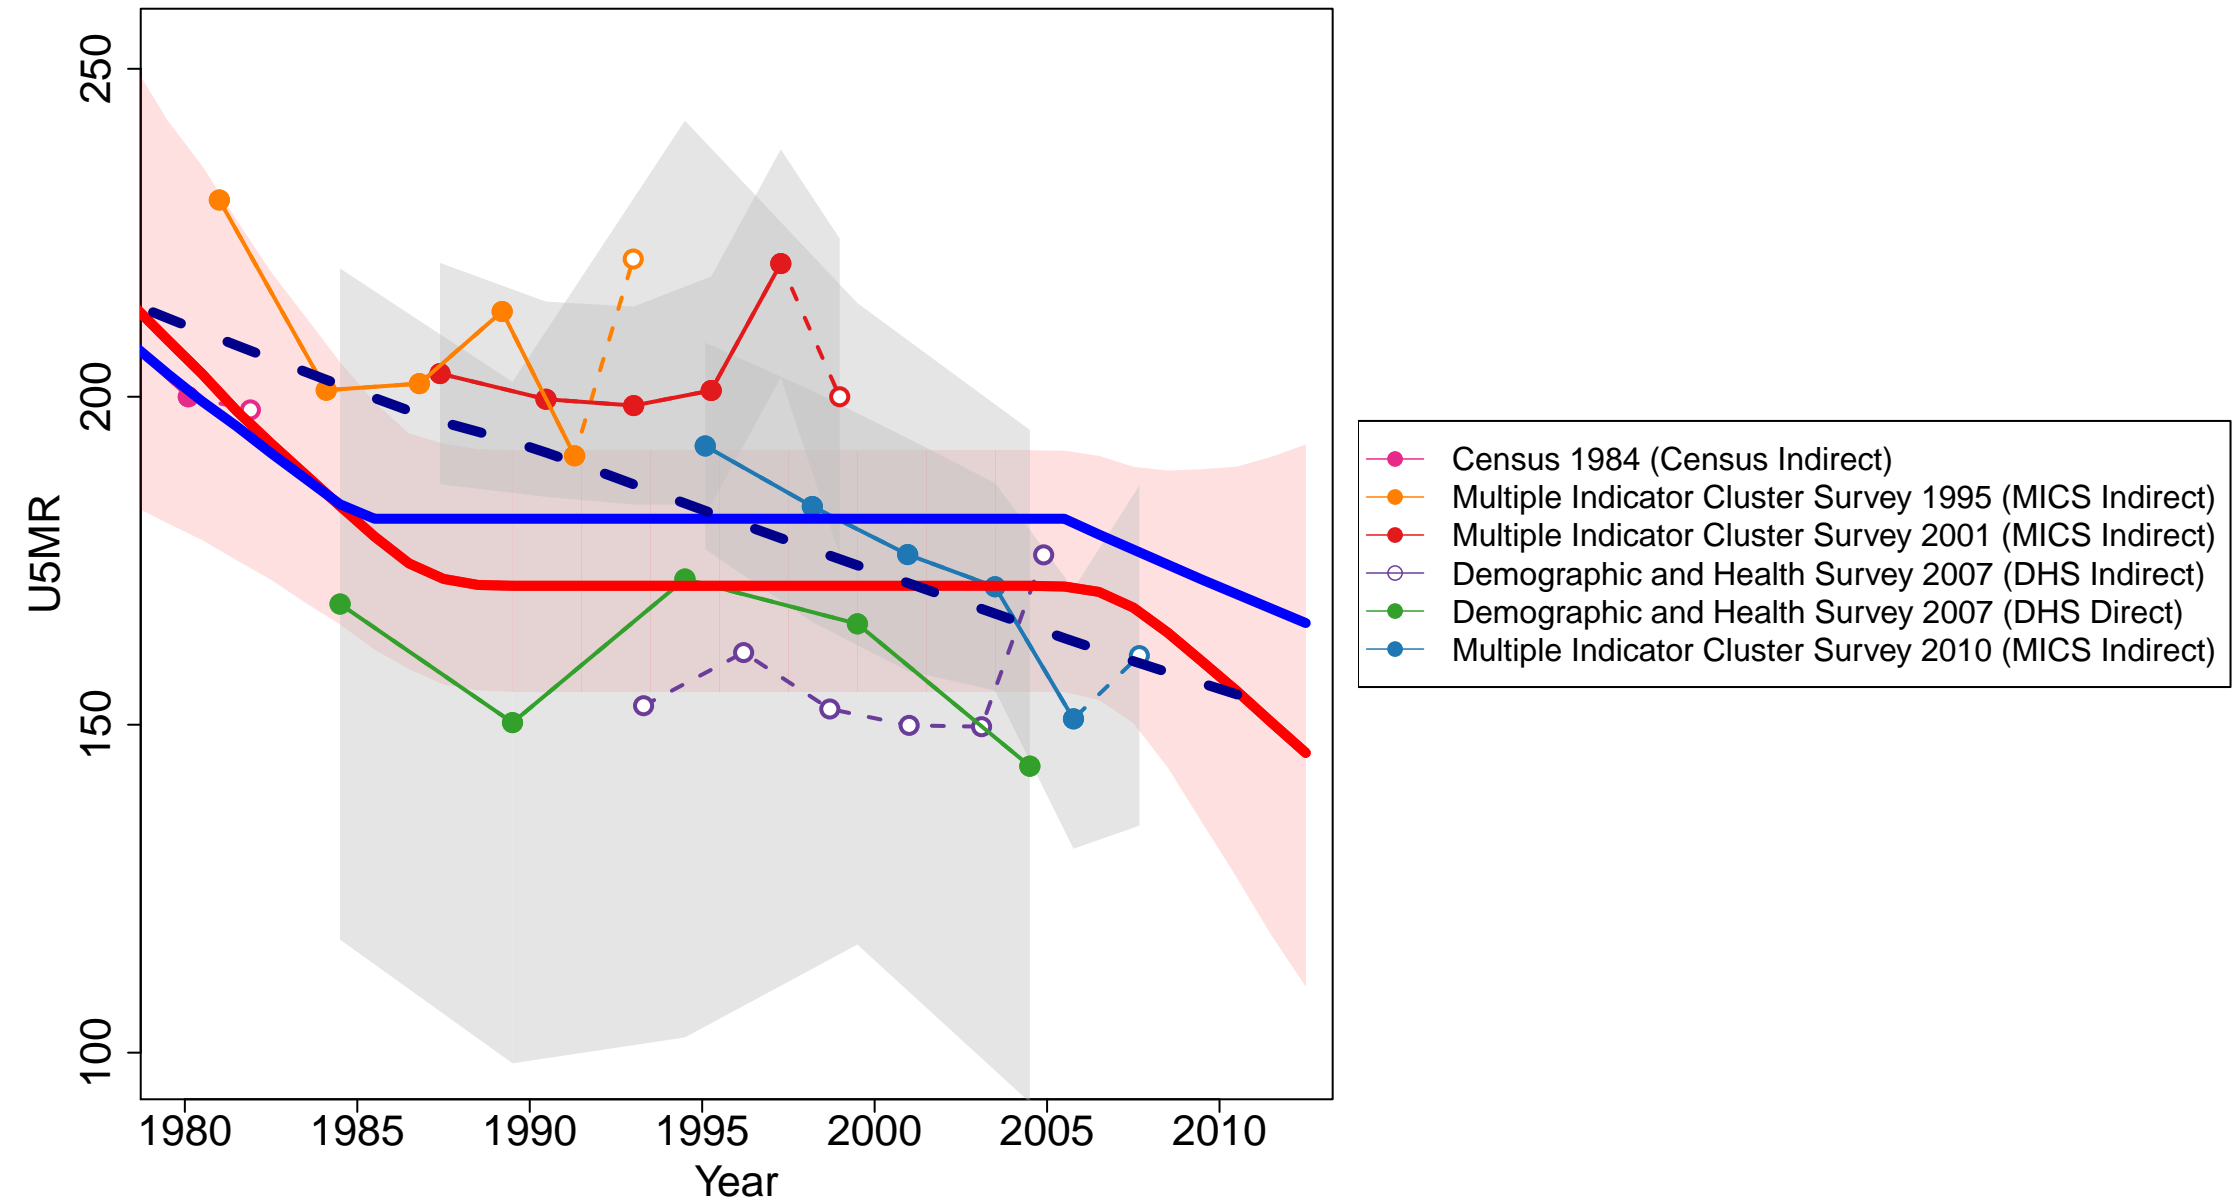

# Korea DPR

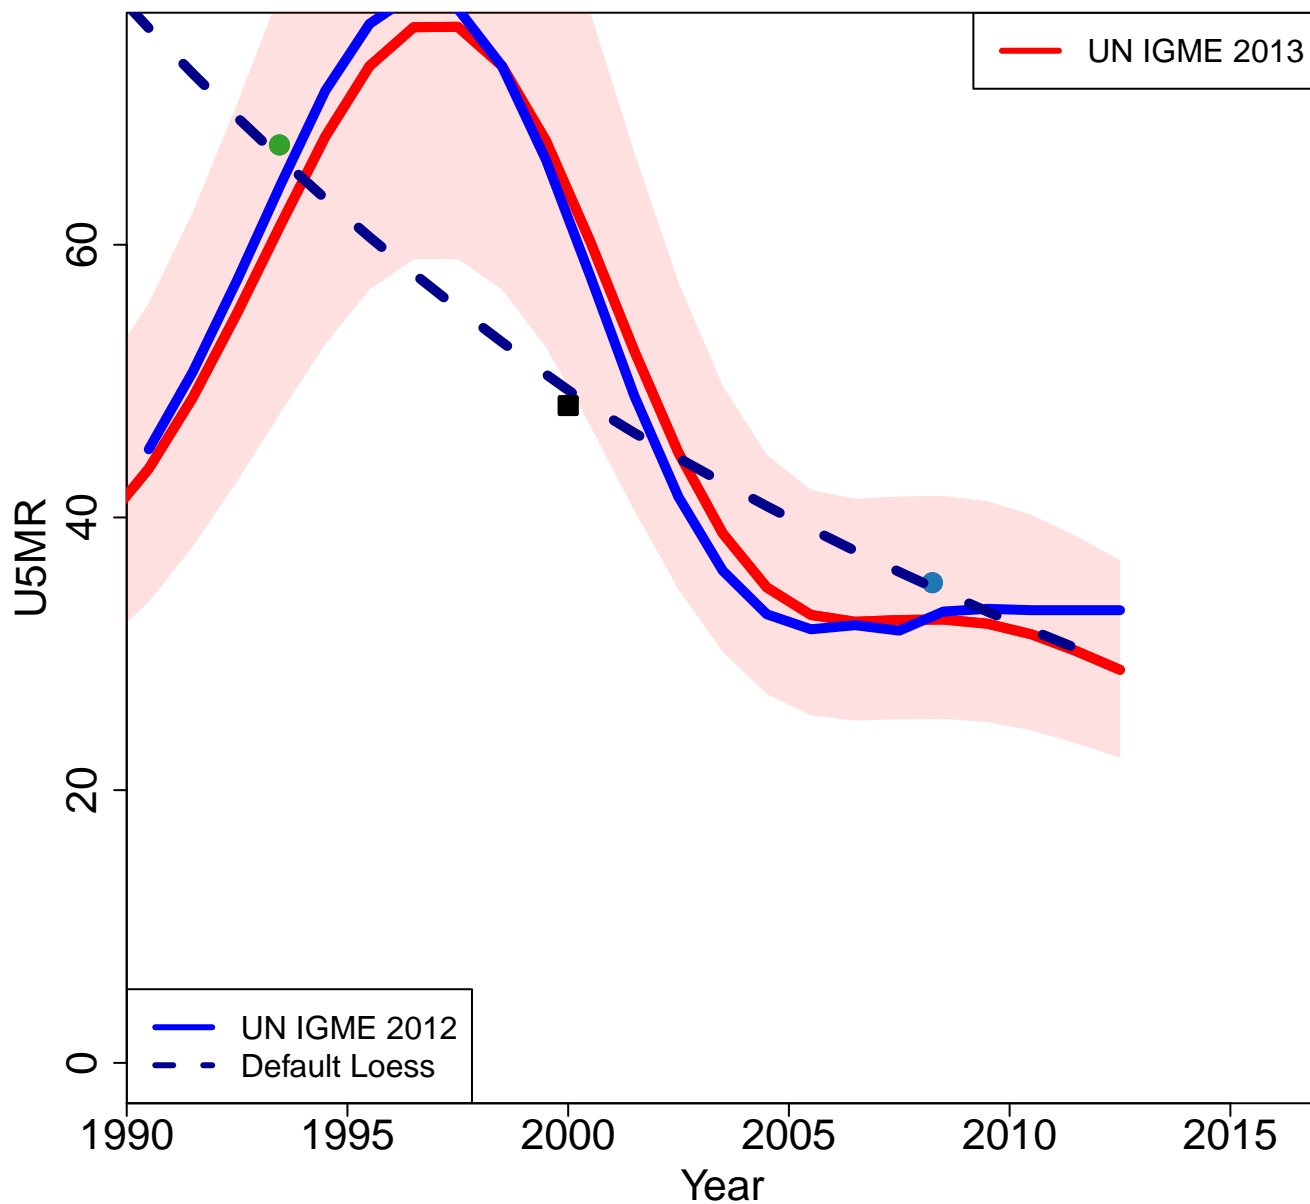

# Zoomed in

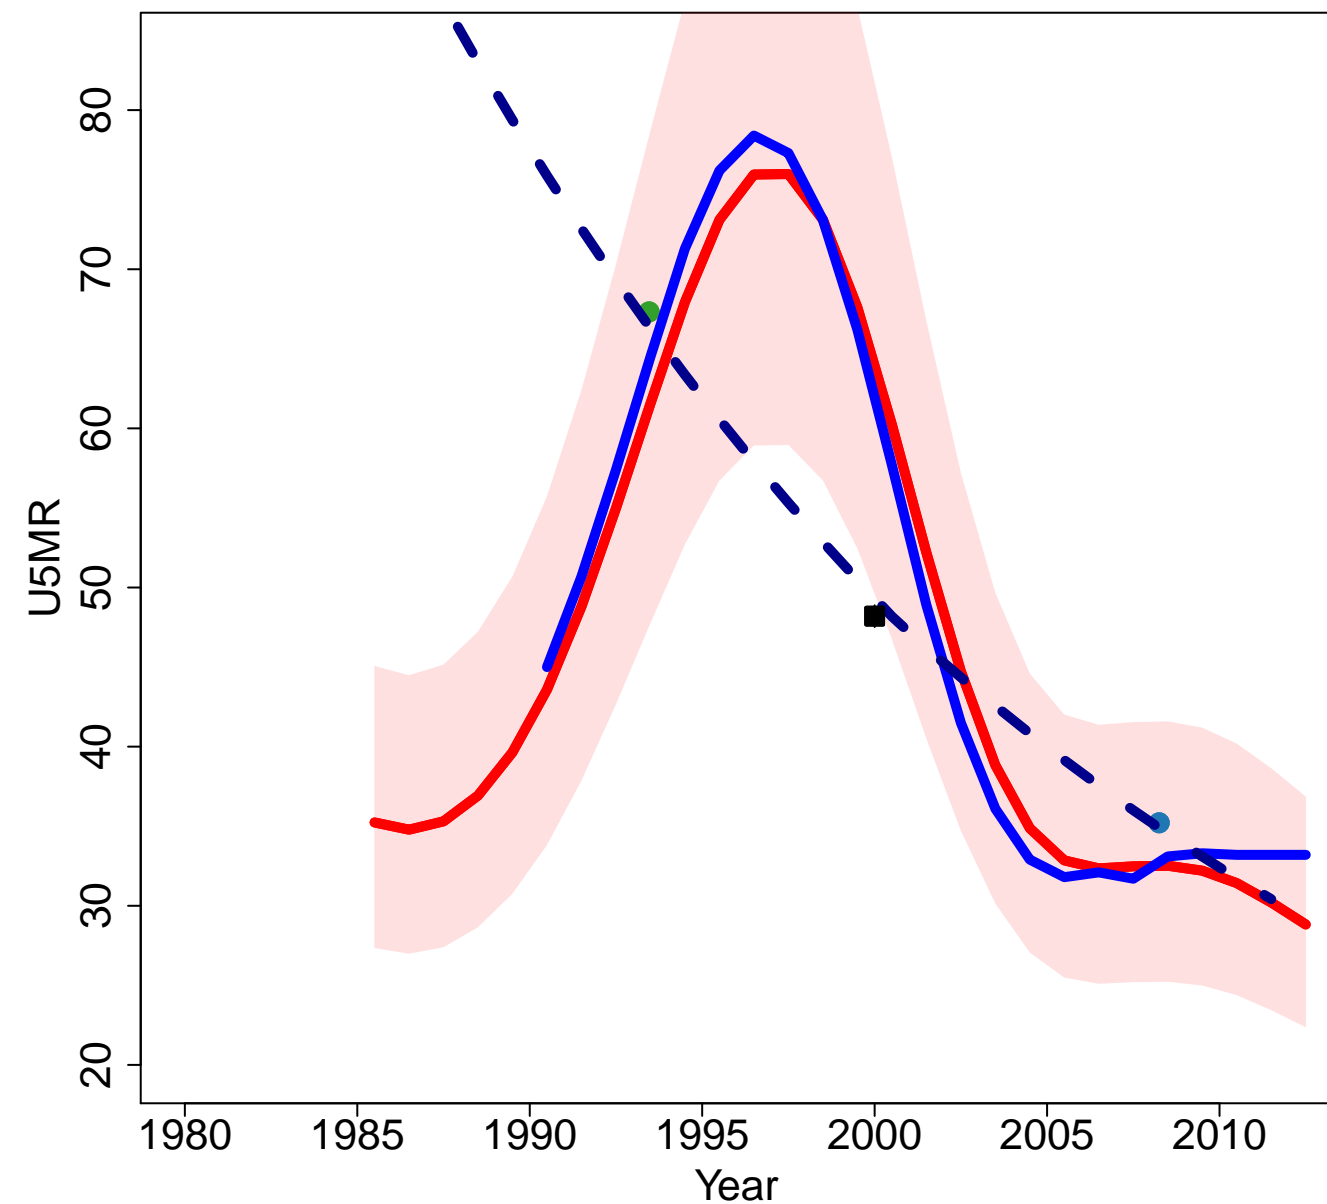

# Nauru

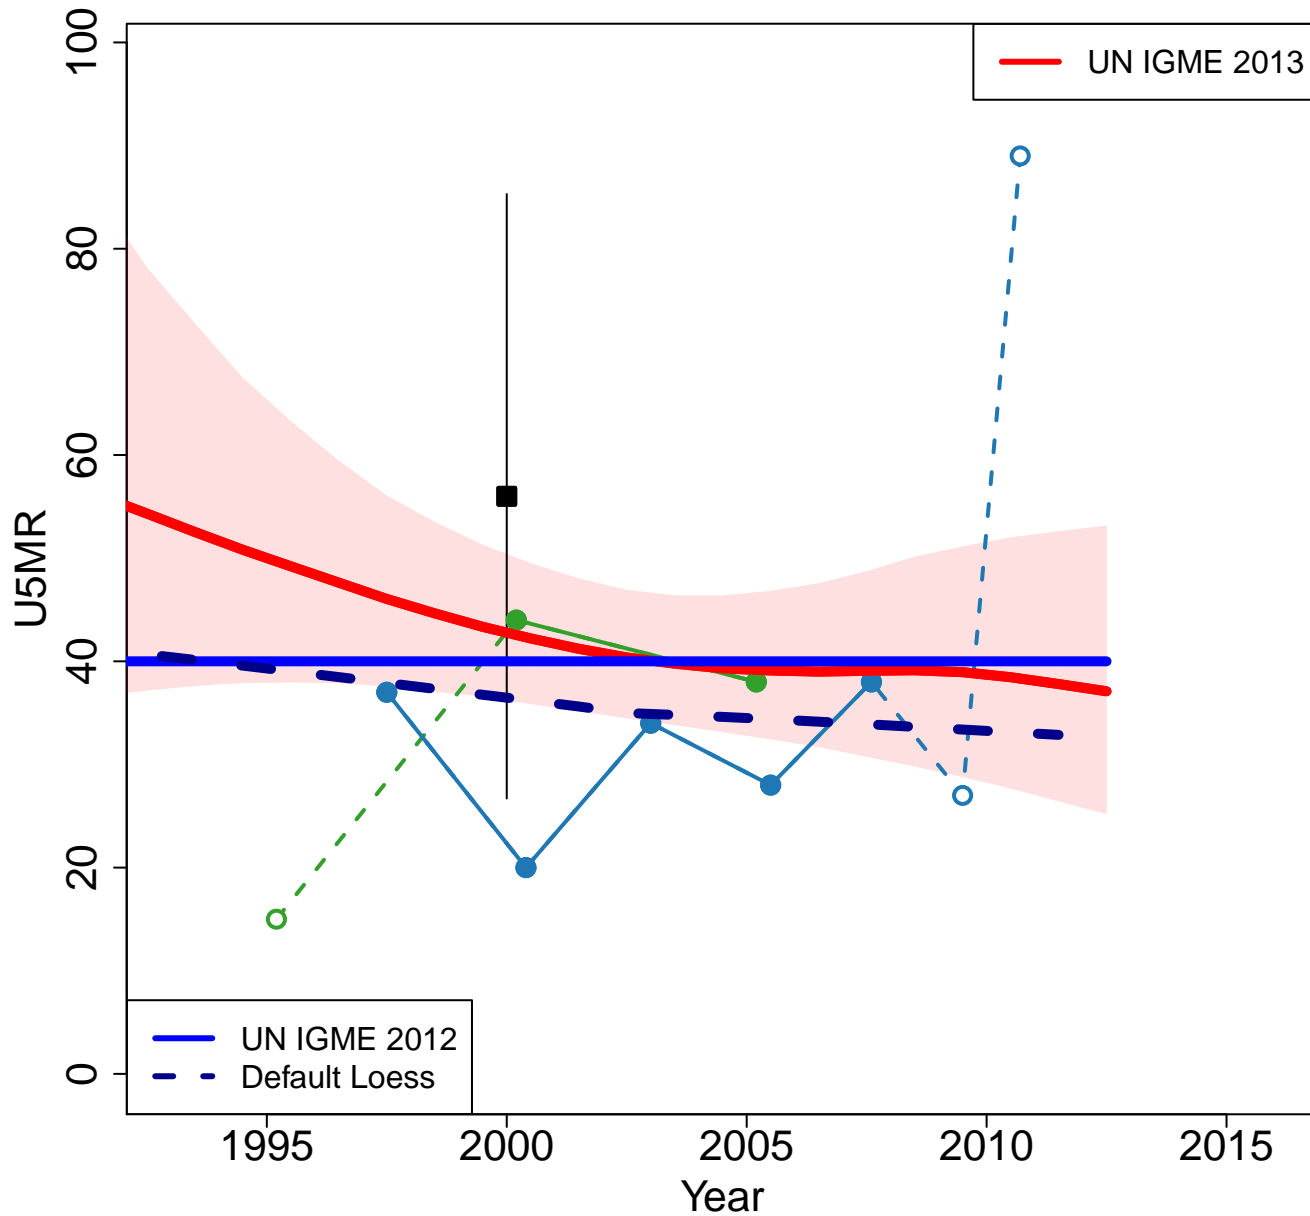

# Zoomed in

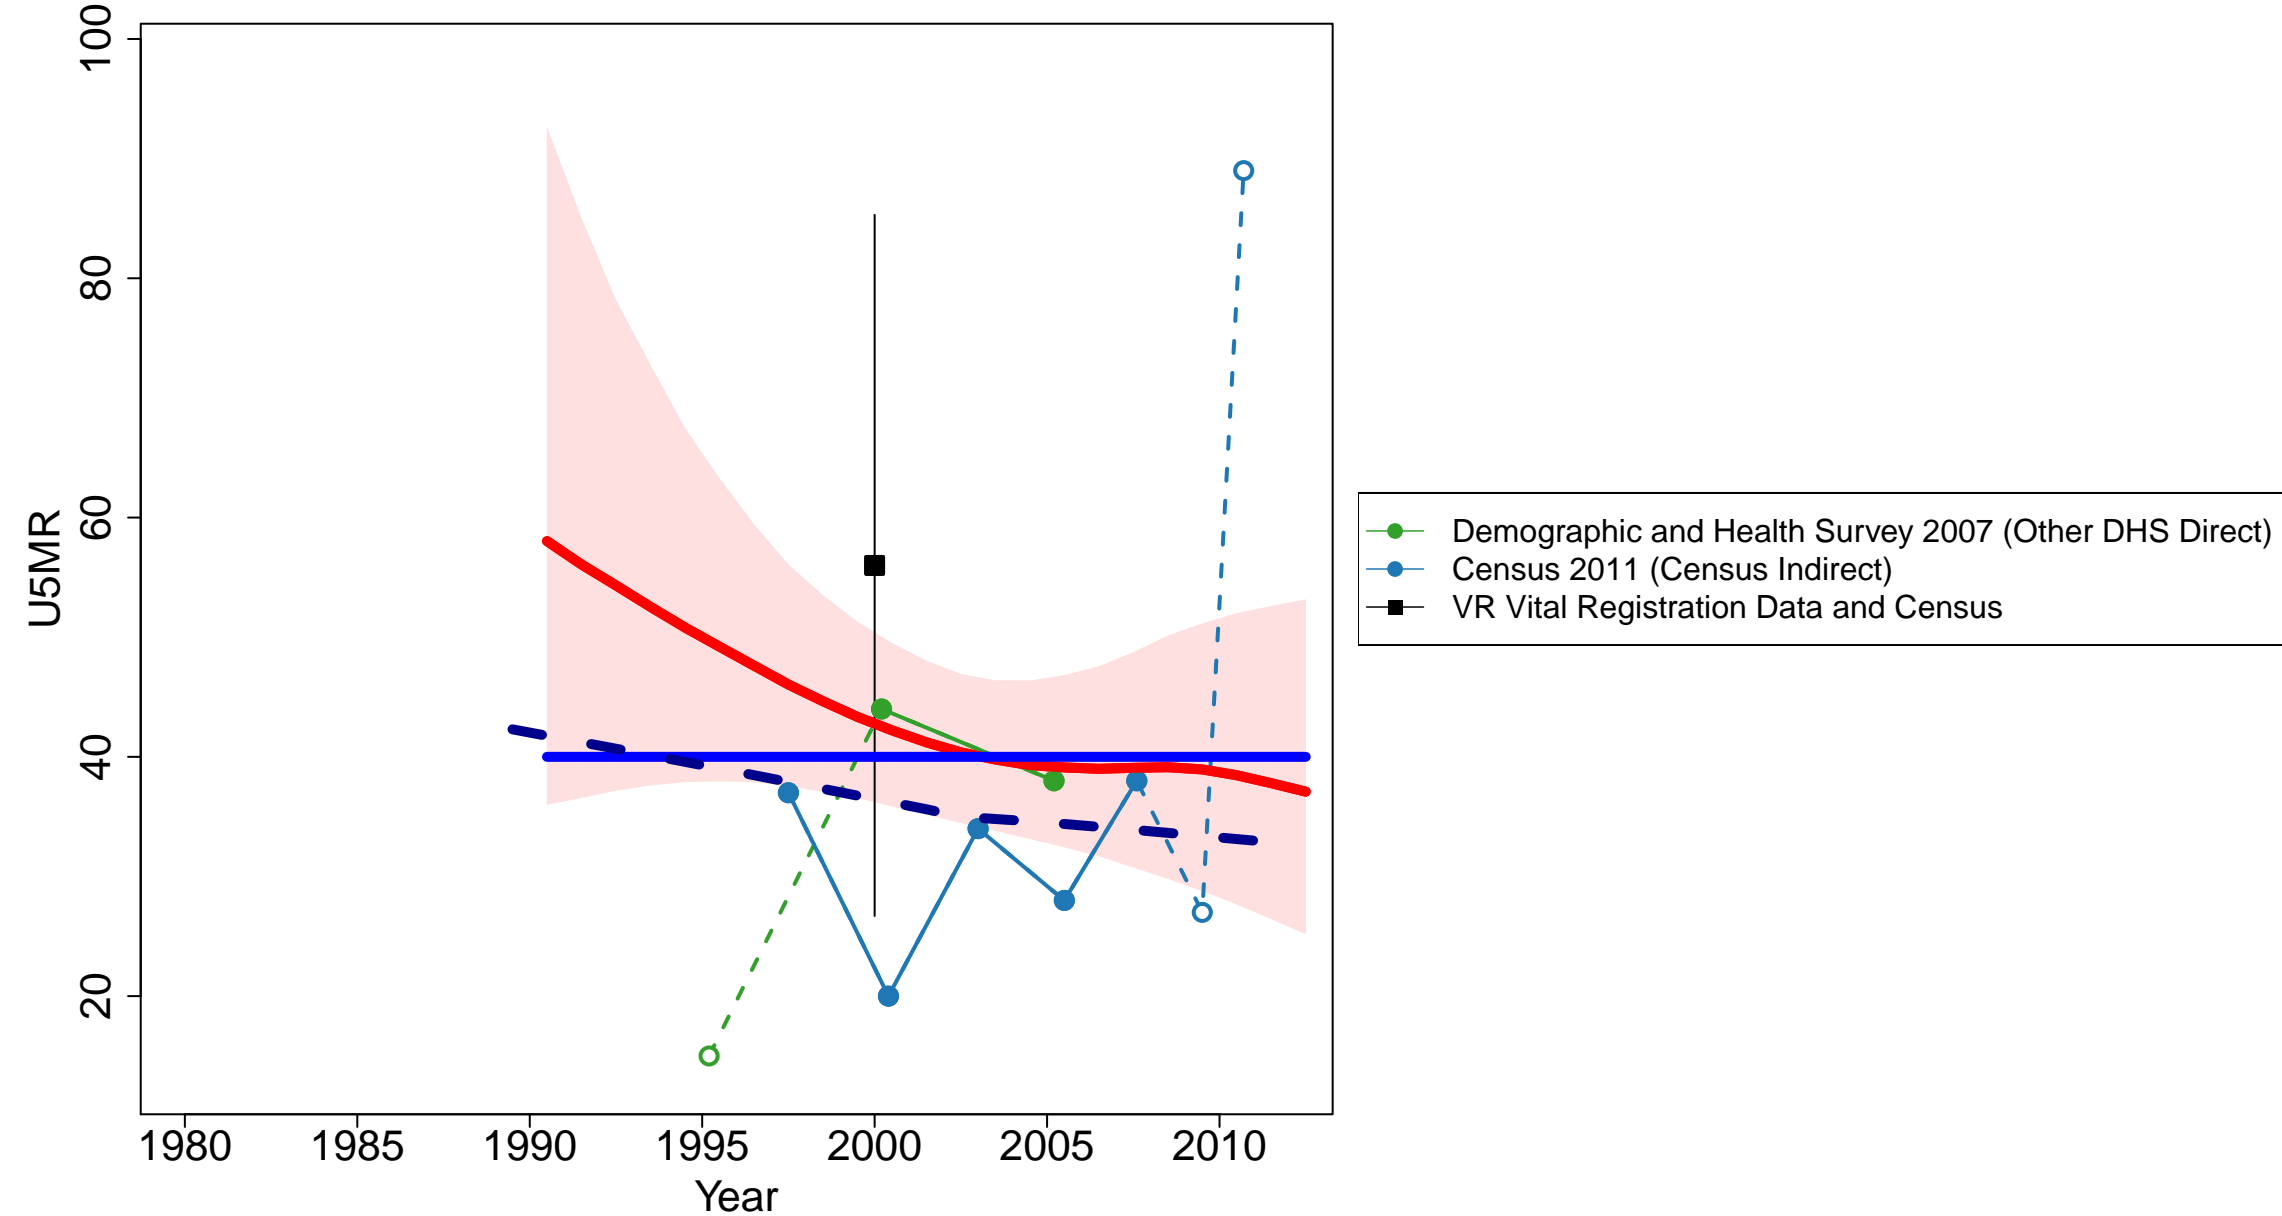

# Somalia

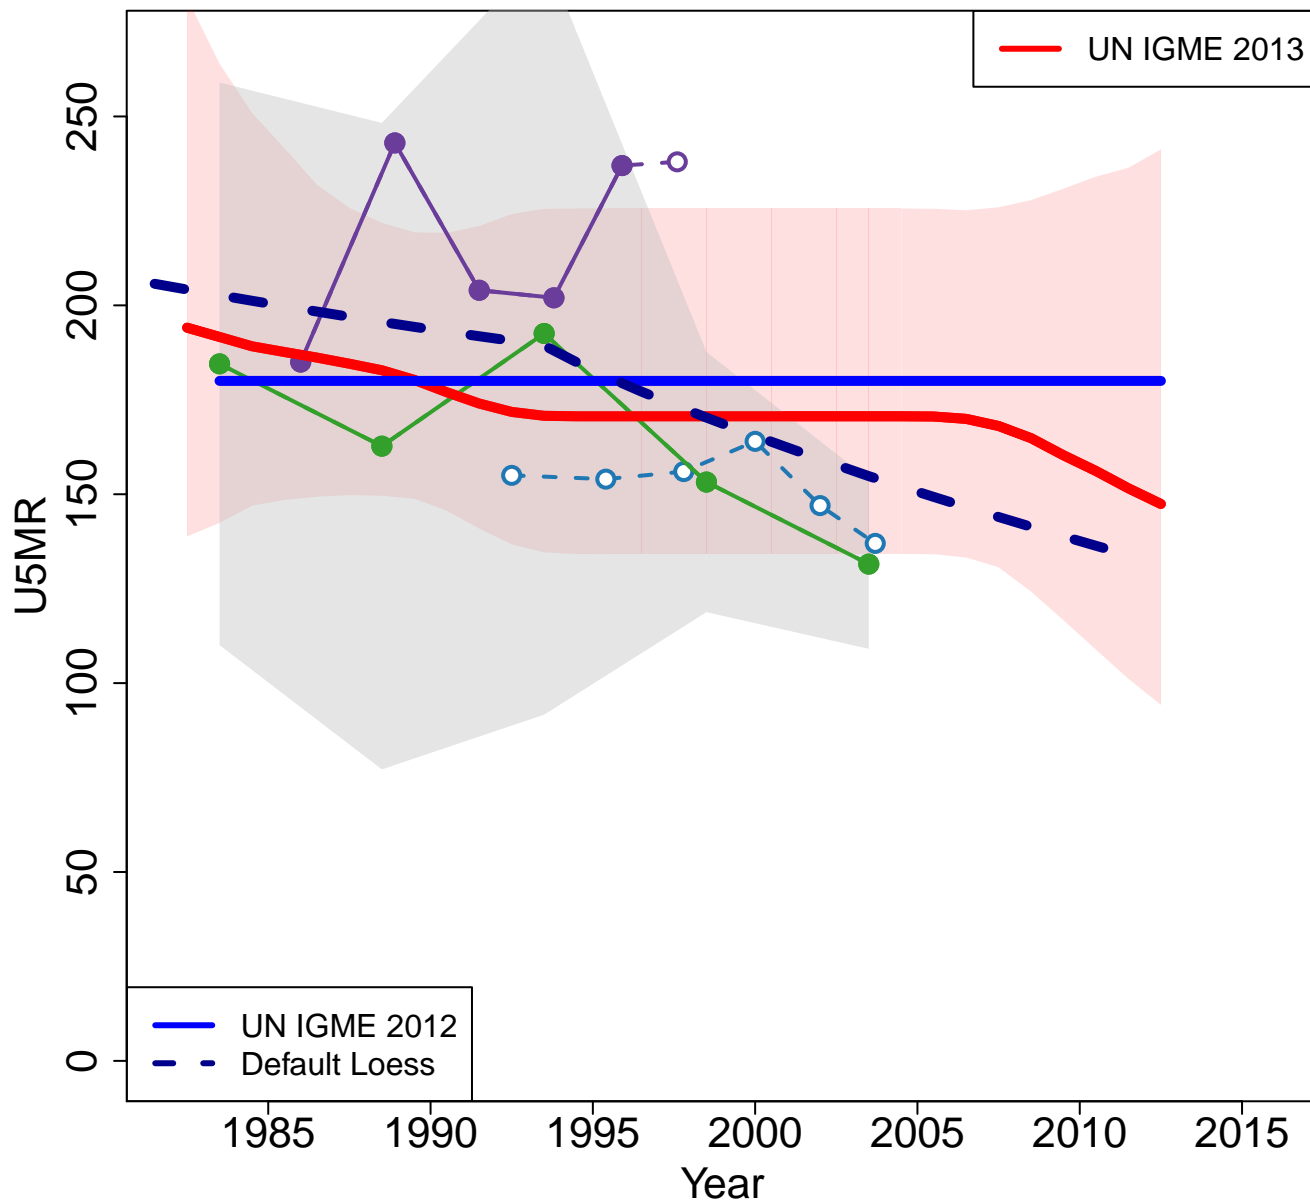

# Zoomed in

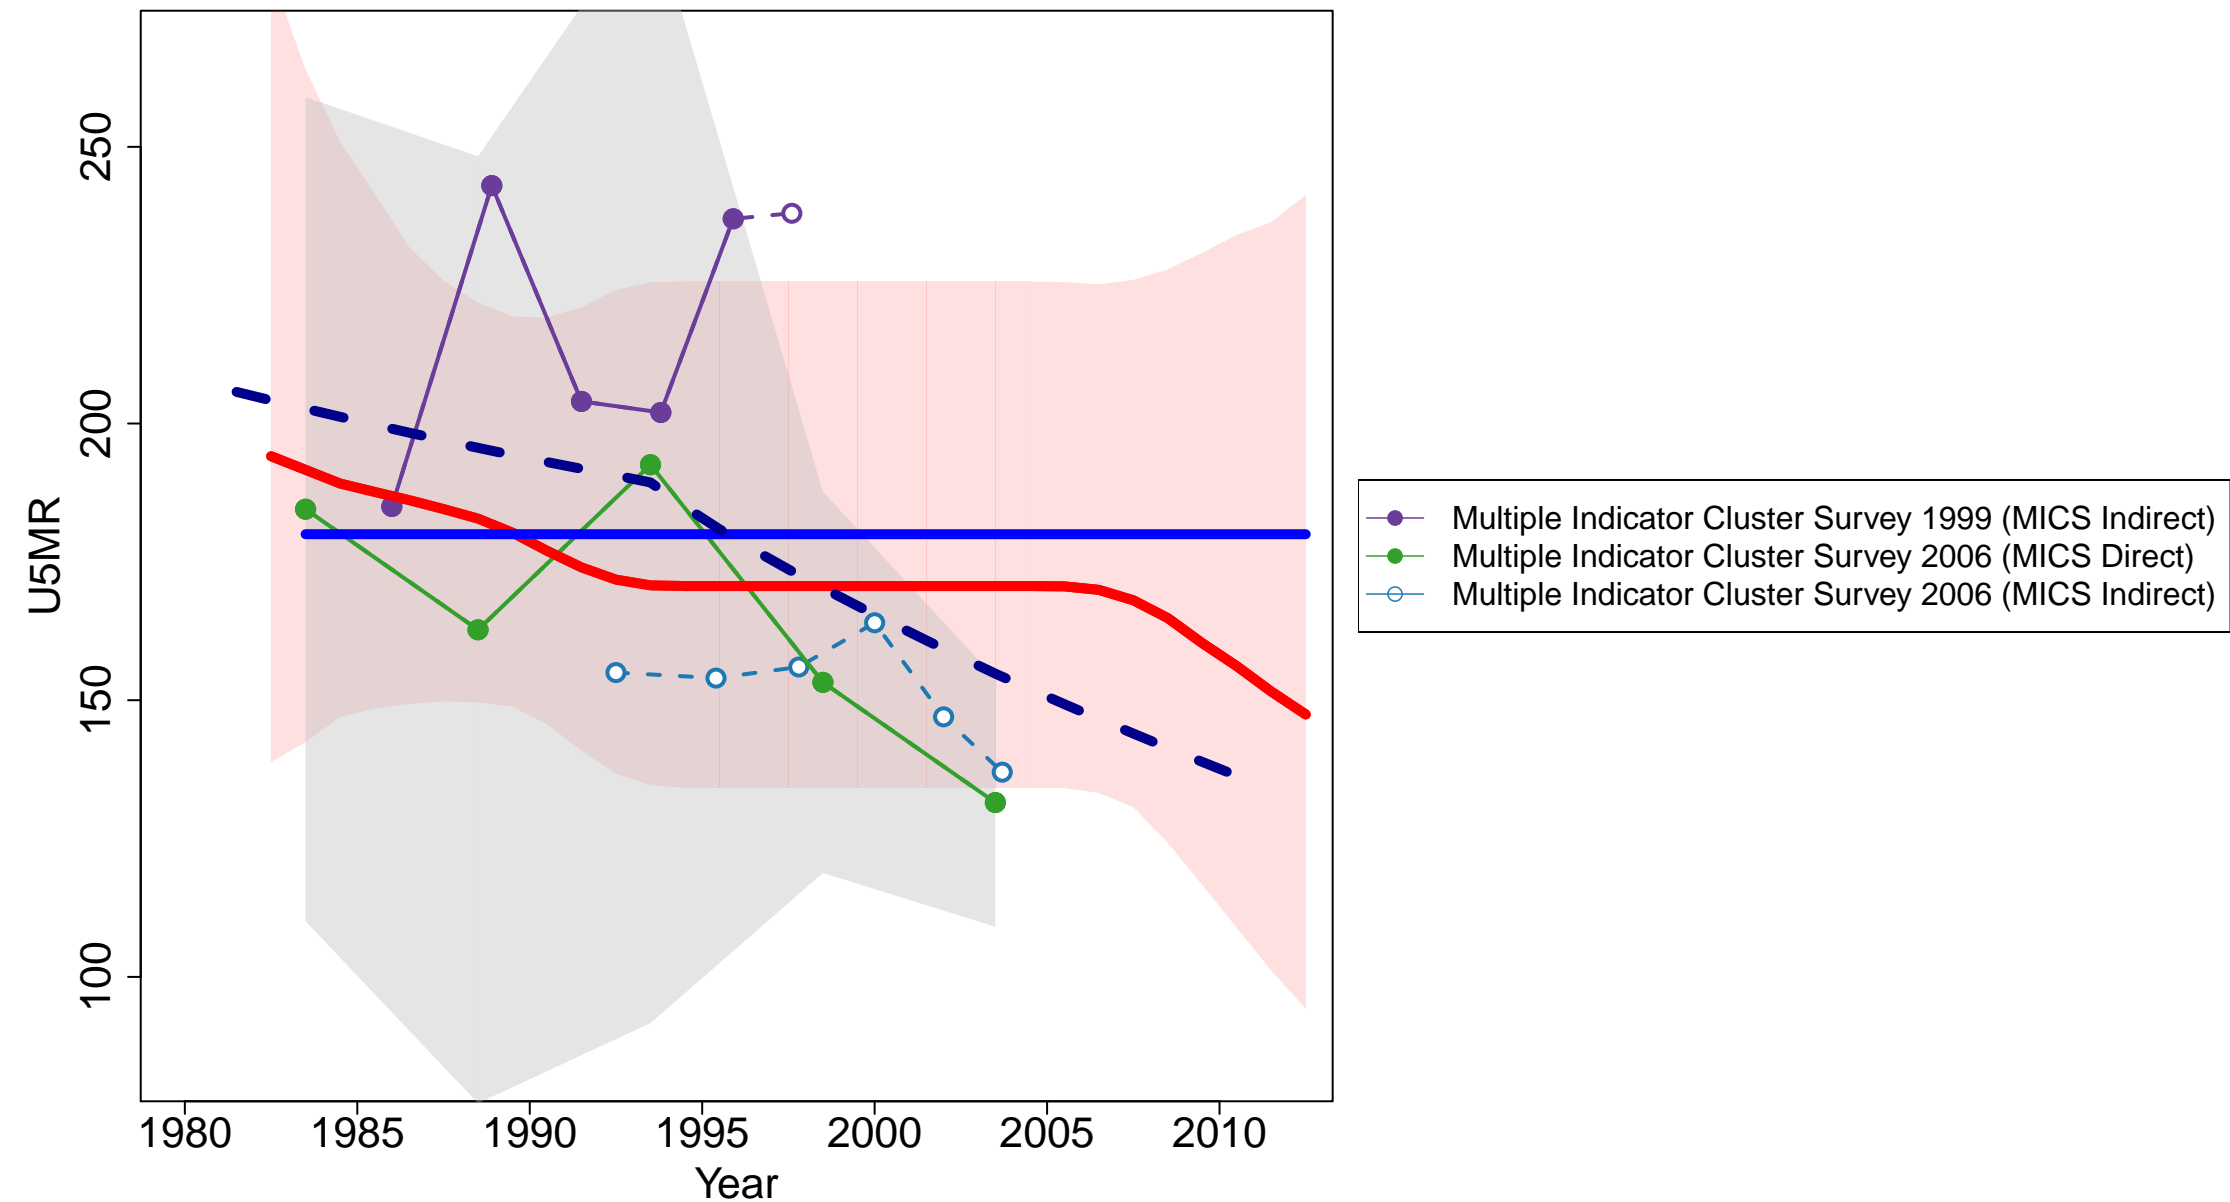

Supplement: S1 (10.1371/journal.pone.0101112.s001) [file journal.pone.0101112.s001]
