# Supplementary material for: Child Mortality Estimation 2013: An Overview of Updates in Estimation Methods by the United Nations Inter-Agency Group for Child Mortality Estimation
Source: PLOS journal article supplement (doi:10.1371/journal.pone.0101112), 2014-07-11

# Afghanistan

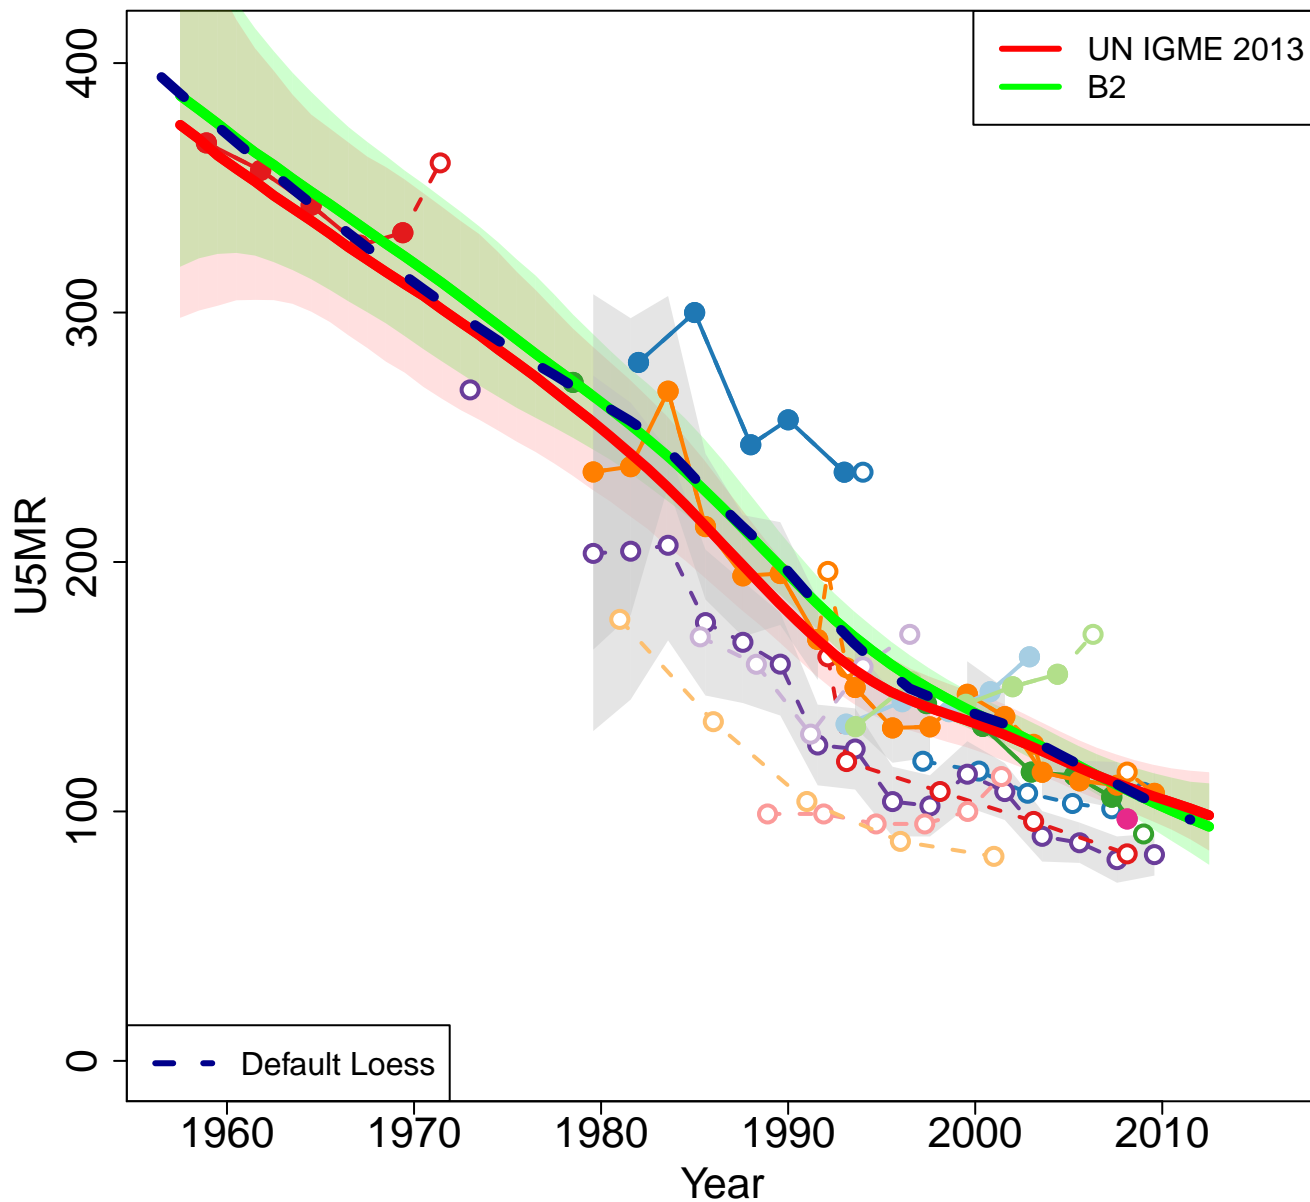

# Zoomed in

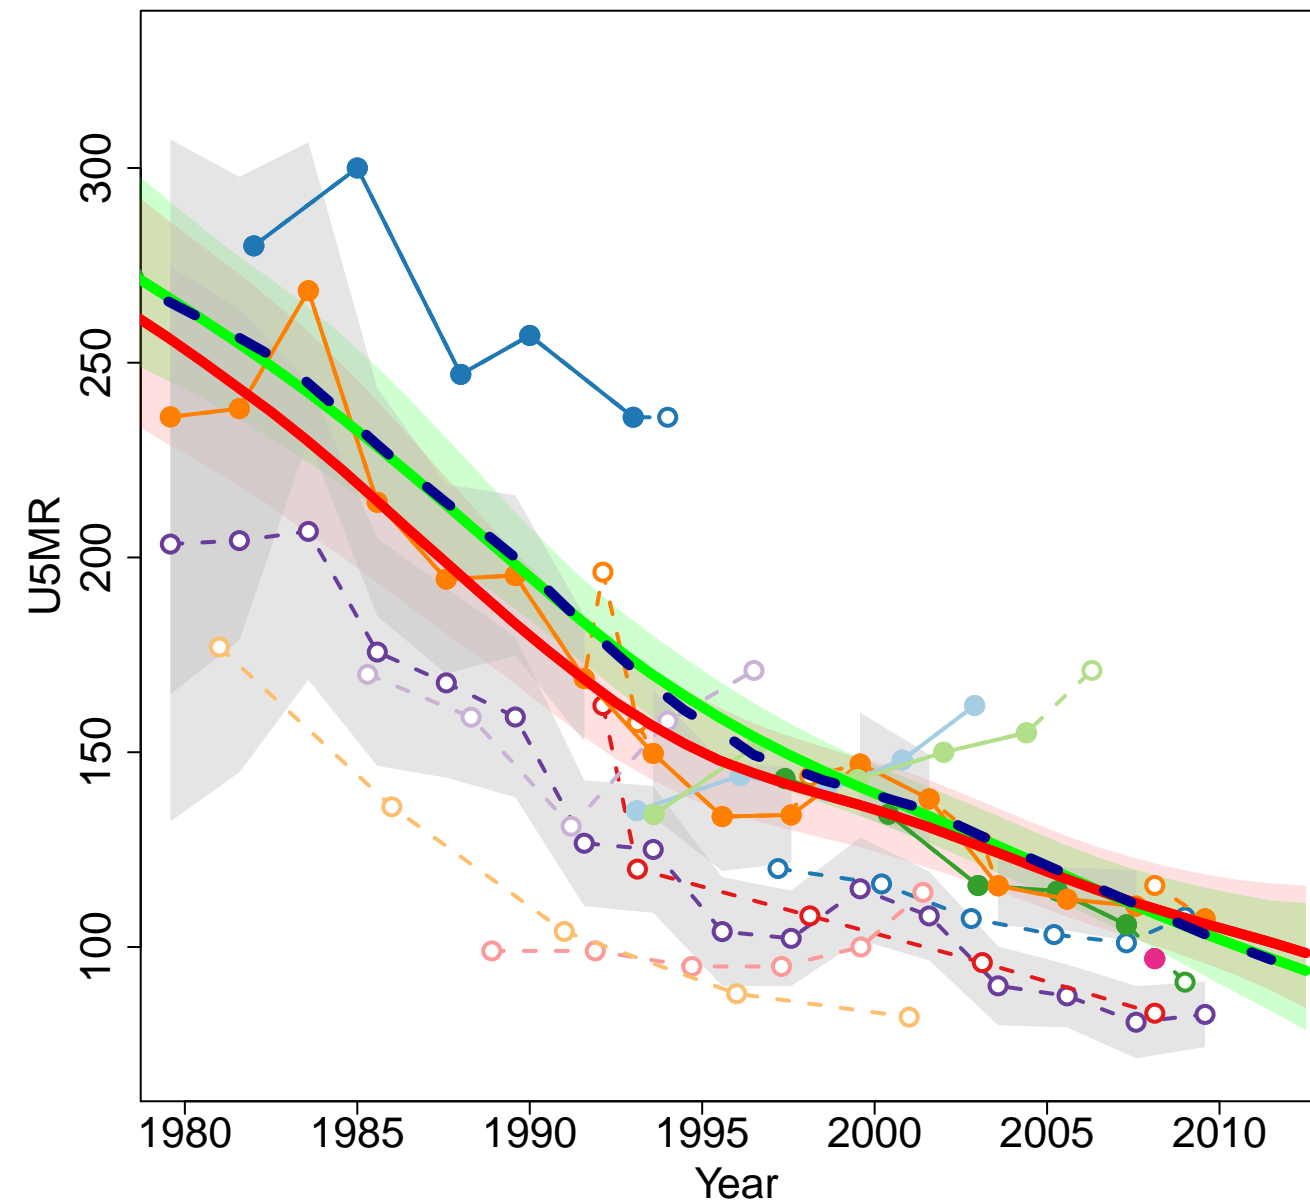

- National Demographic and Family Guidance Survey 1972 (Others Indirect)
- National Demographic and Family Guidance Survey 1973 (Others Household Deaths)
- Census 1978 (Others Household Deaths)
- Multiple Indicator Cluster Survey 1997 (MICS Indirect)
- Multiple Indicator Cluster Survey 2000 (MICS Indirect)
- Multiple Indicator Cluster Survey 2003 (MICS Direct)
- Multiple Indicator Cluster Survey 2003 (MICS Indirect)
- National Risk and Vulnerability Assessment Survey 2007–2008 (Others Indirect)
- Demographic and Health Survey 2007 (Other DHS Indirect)
- Afghanistan Mortality Survey 2008 (Others Household Deaths)
- Afghanistan Mortality Survey 2010 (DHS Direct)
- Afghanistan Mortality Survey 2010 (DHS Direct)
- Multiple Indicator Cluster Survey Excluding South 2011 (MICS Indirect)
- Multiple Indicator Cluster Survey 2011 (MICS Indirect)

# Algeria

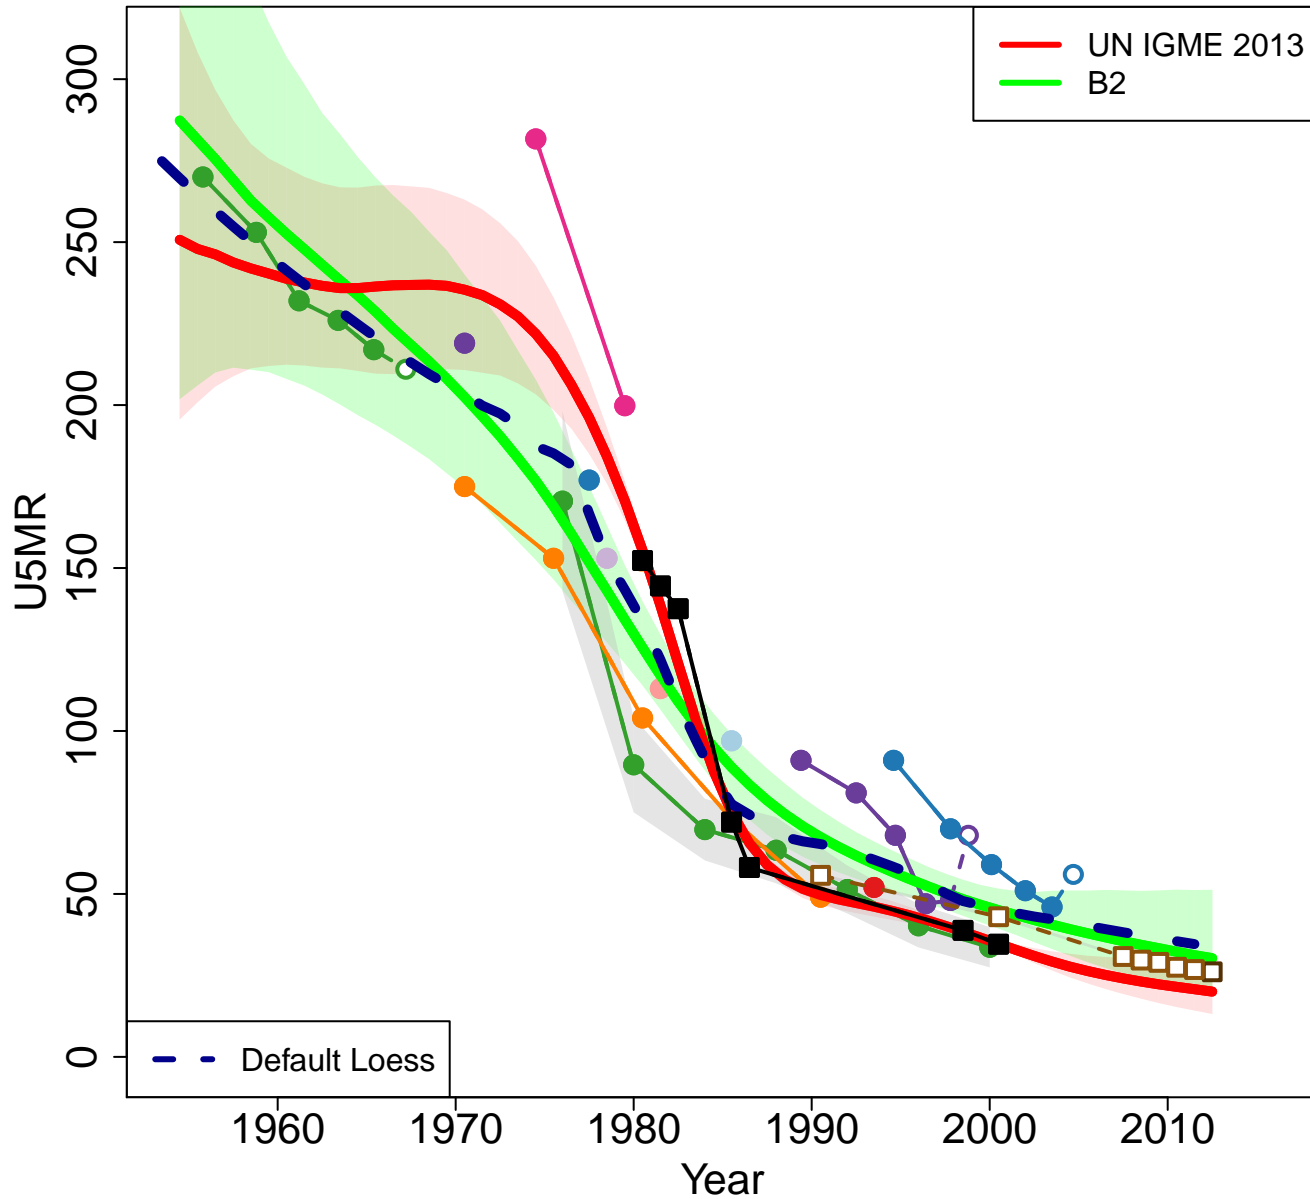

# Zoomed in

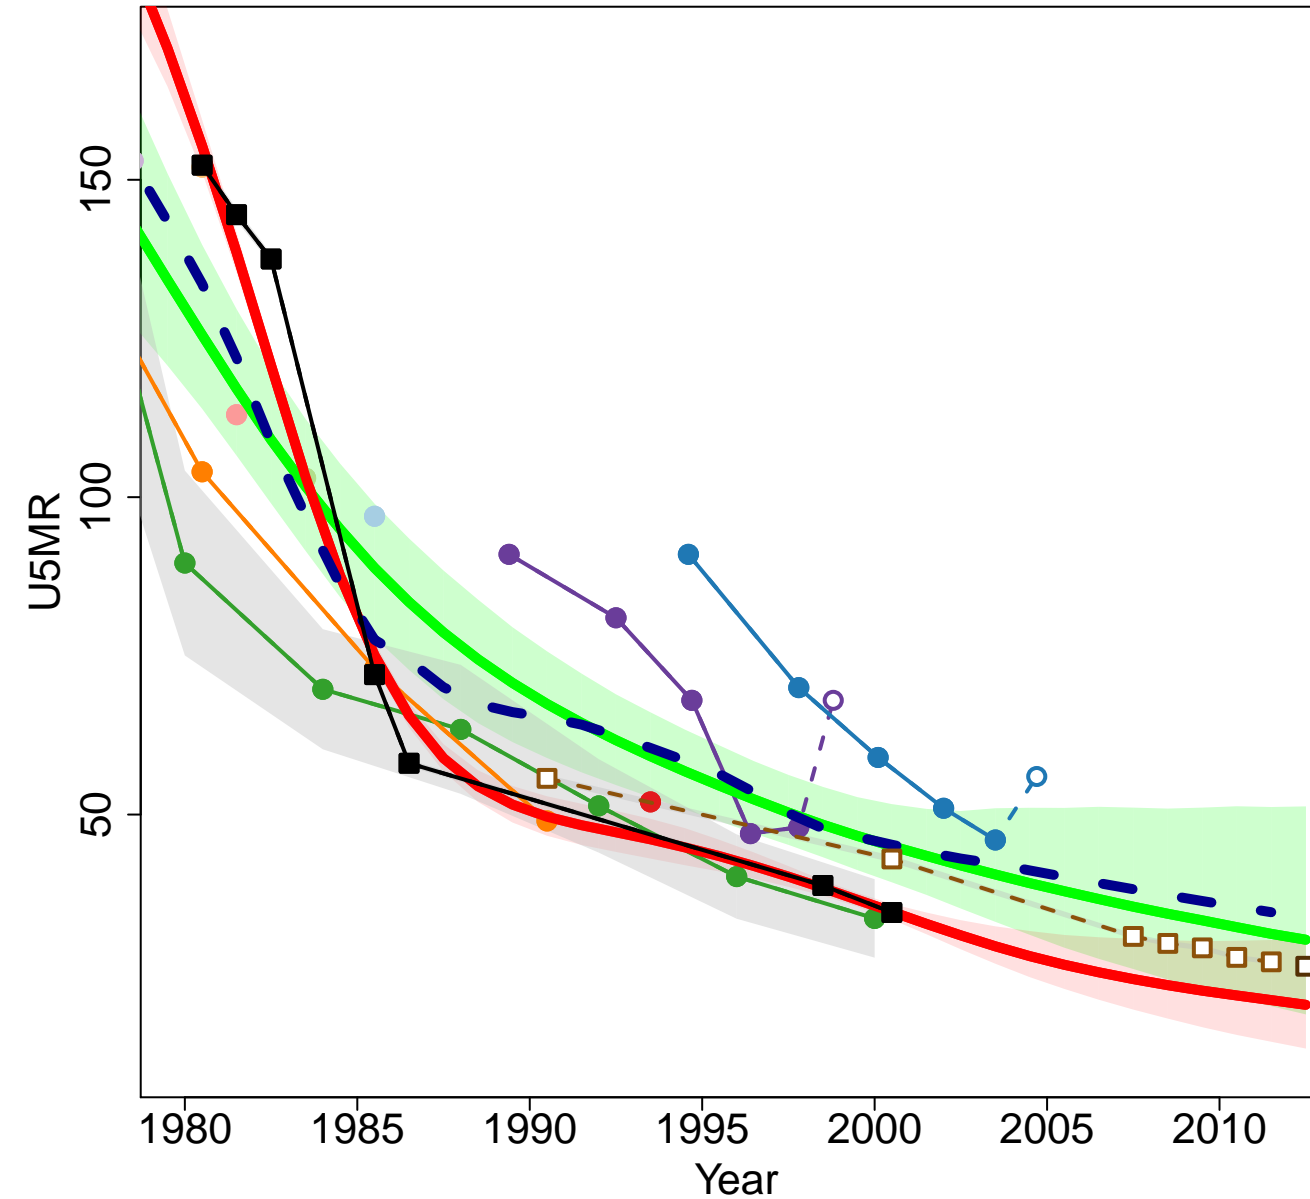

- Enquete Demographique 1970 (Others Direct)
- Enquete Fecondite 1970 (Others Indirect)
- Life Tables 1977 (Others Life Table)
- Life Tables 1978 (Others Life Table)
- Life Tables 1980 (Others Life Table)
- Life Tables 1981 (Others Life Table)
- Life Tables 1983 (Others Life Table)
- Life Tables 1985 (Others Life Table)
- Enquete nationale sur la fecondite 1986 (Others Direct)
- Enquete Algerienne sur la Sante de la Mere/Enfant 1992 (Others Direct)
- Enquete nationale sur les objectifs 1995 (Others Direct)
- Multiple Indicator Cluster Survey 2000 (MICS Indirect)
- PAPFAM Family Health Survey 2002 (Others Direct)
- Multiple Indicator Cluster Survey 2006 (MICS Indirect)
- VR VR from Demographie Algerienne
- VR VR from Demographie Algerienne
- VR WHO (Recalculated)

# Angola

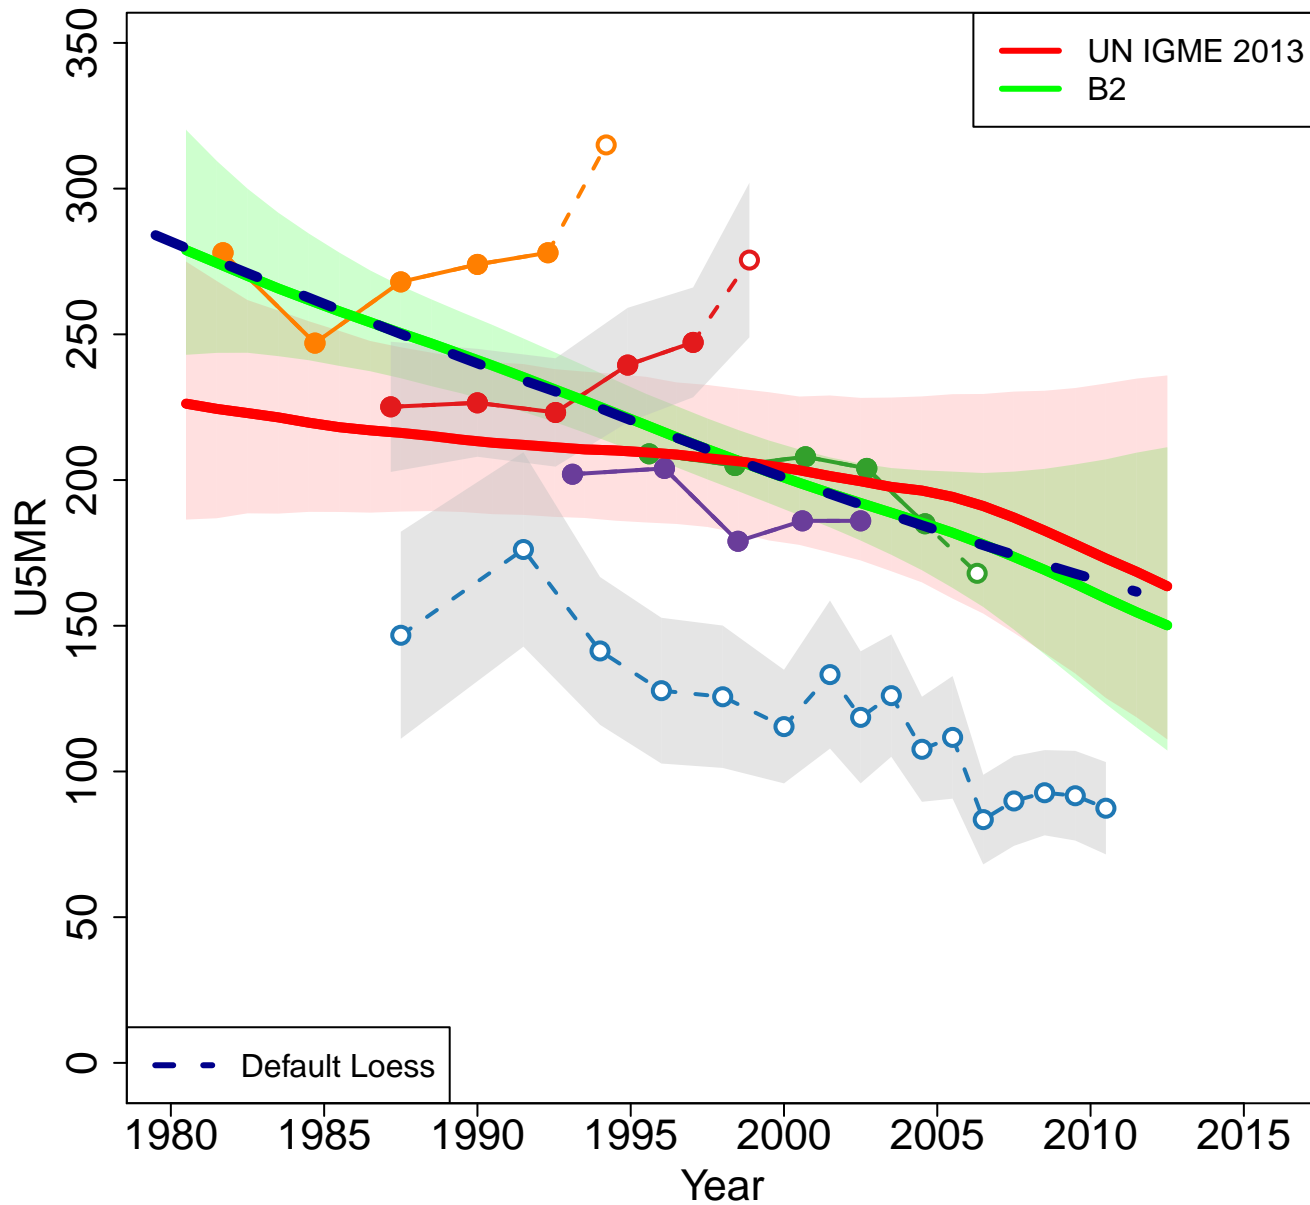

# Zoomed in

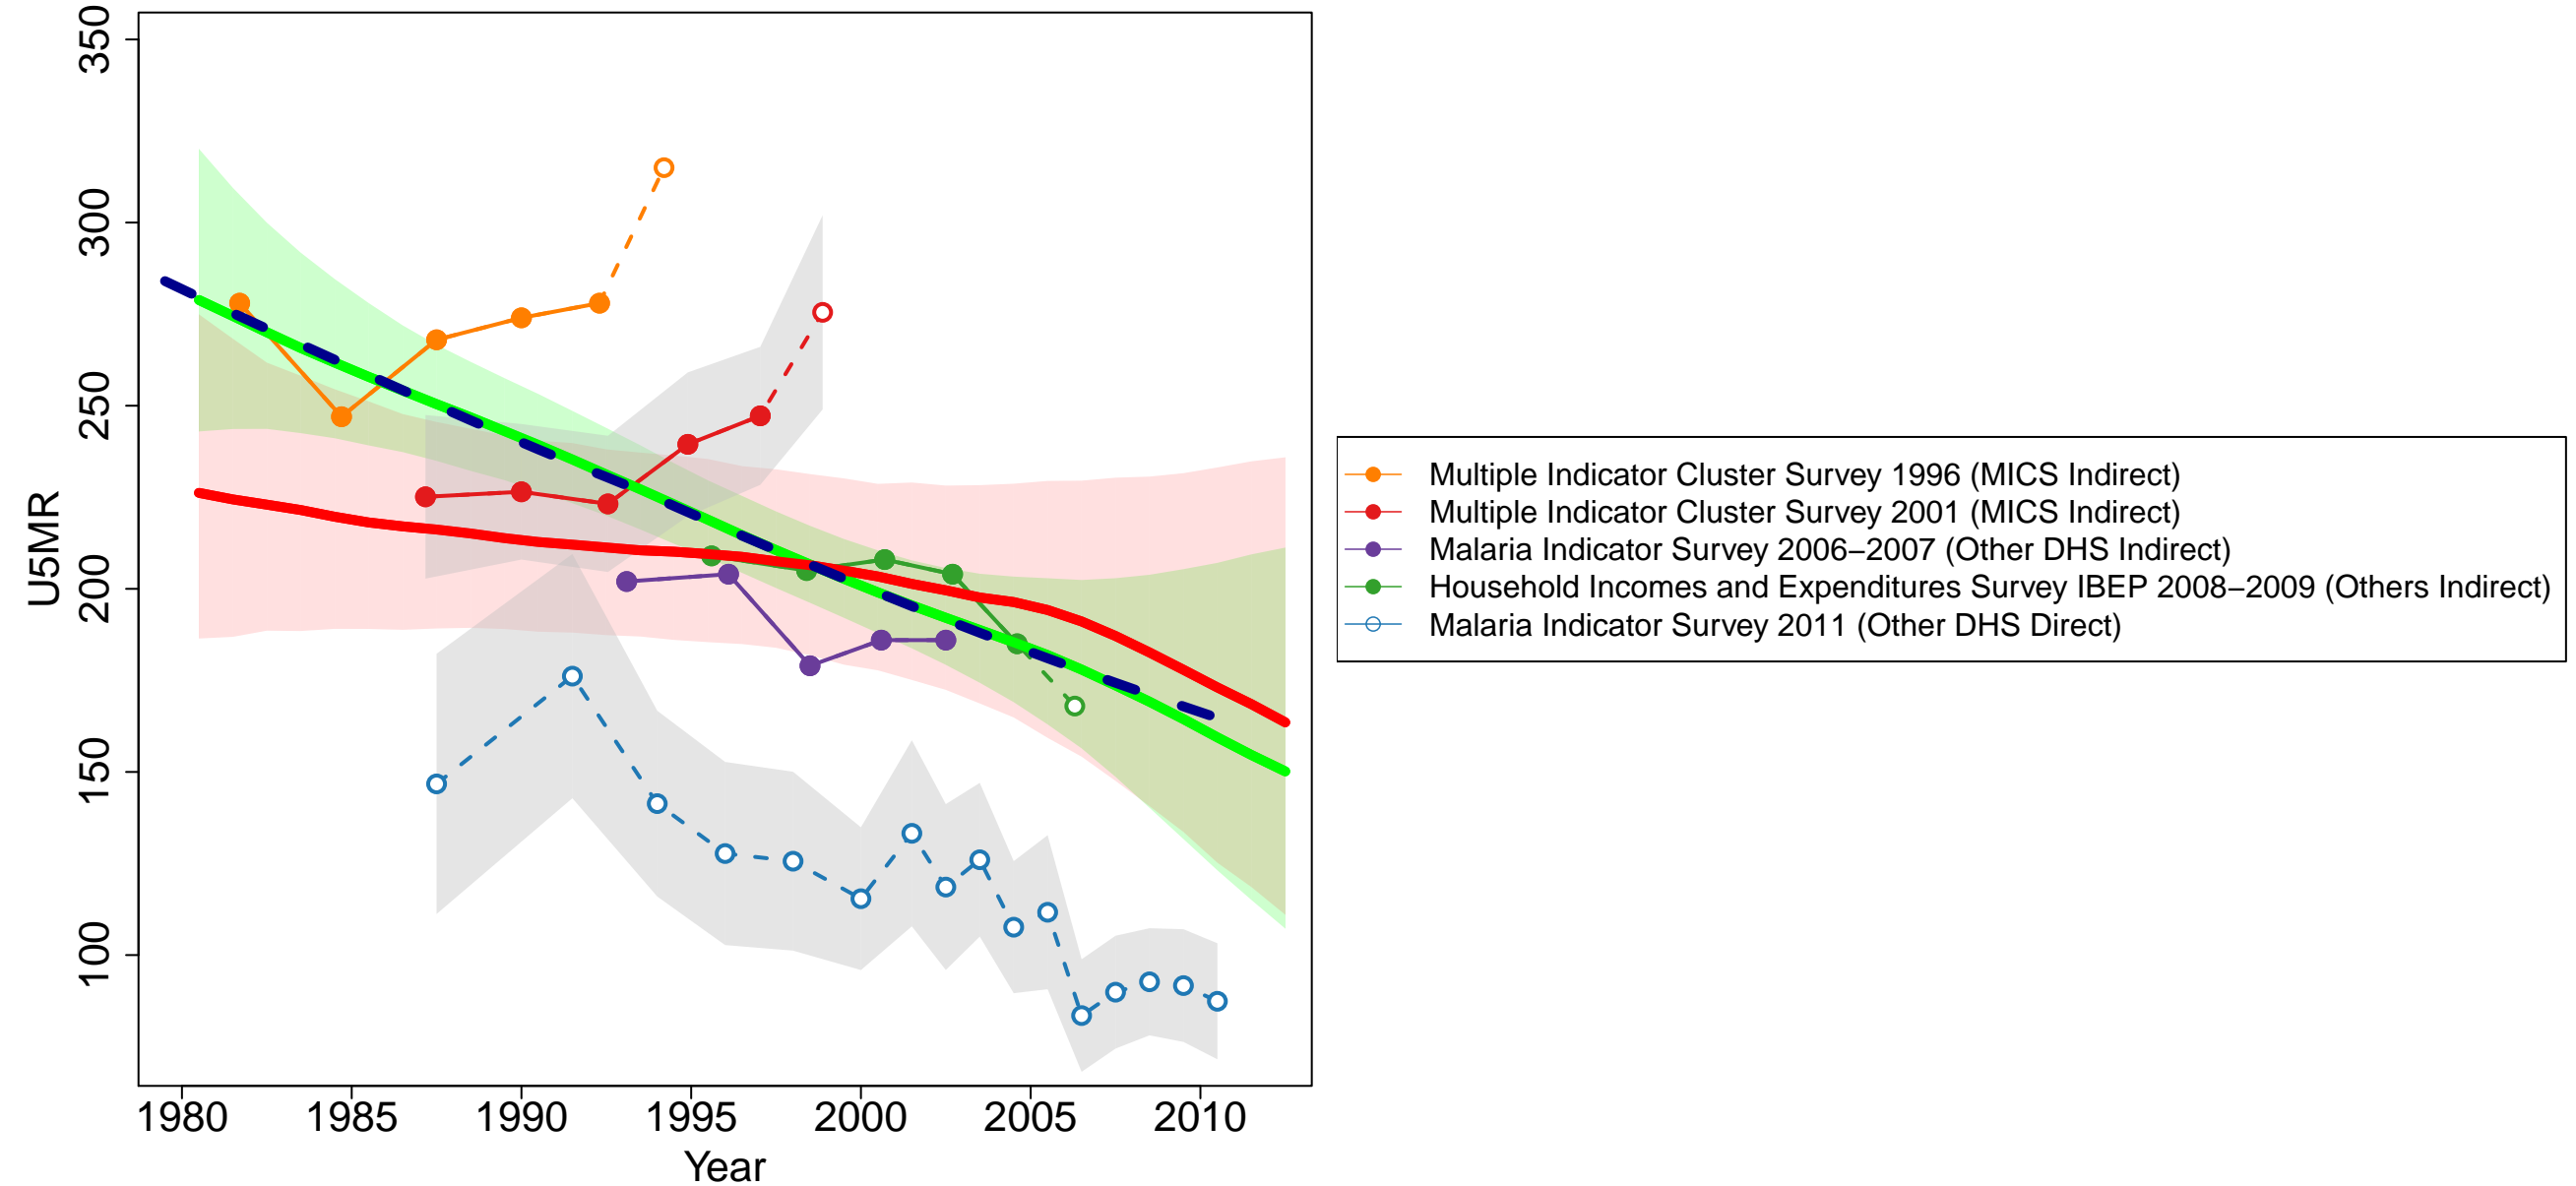

# Benin

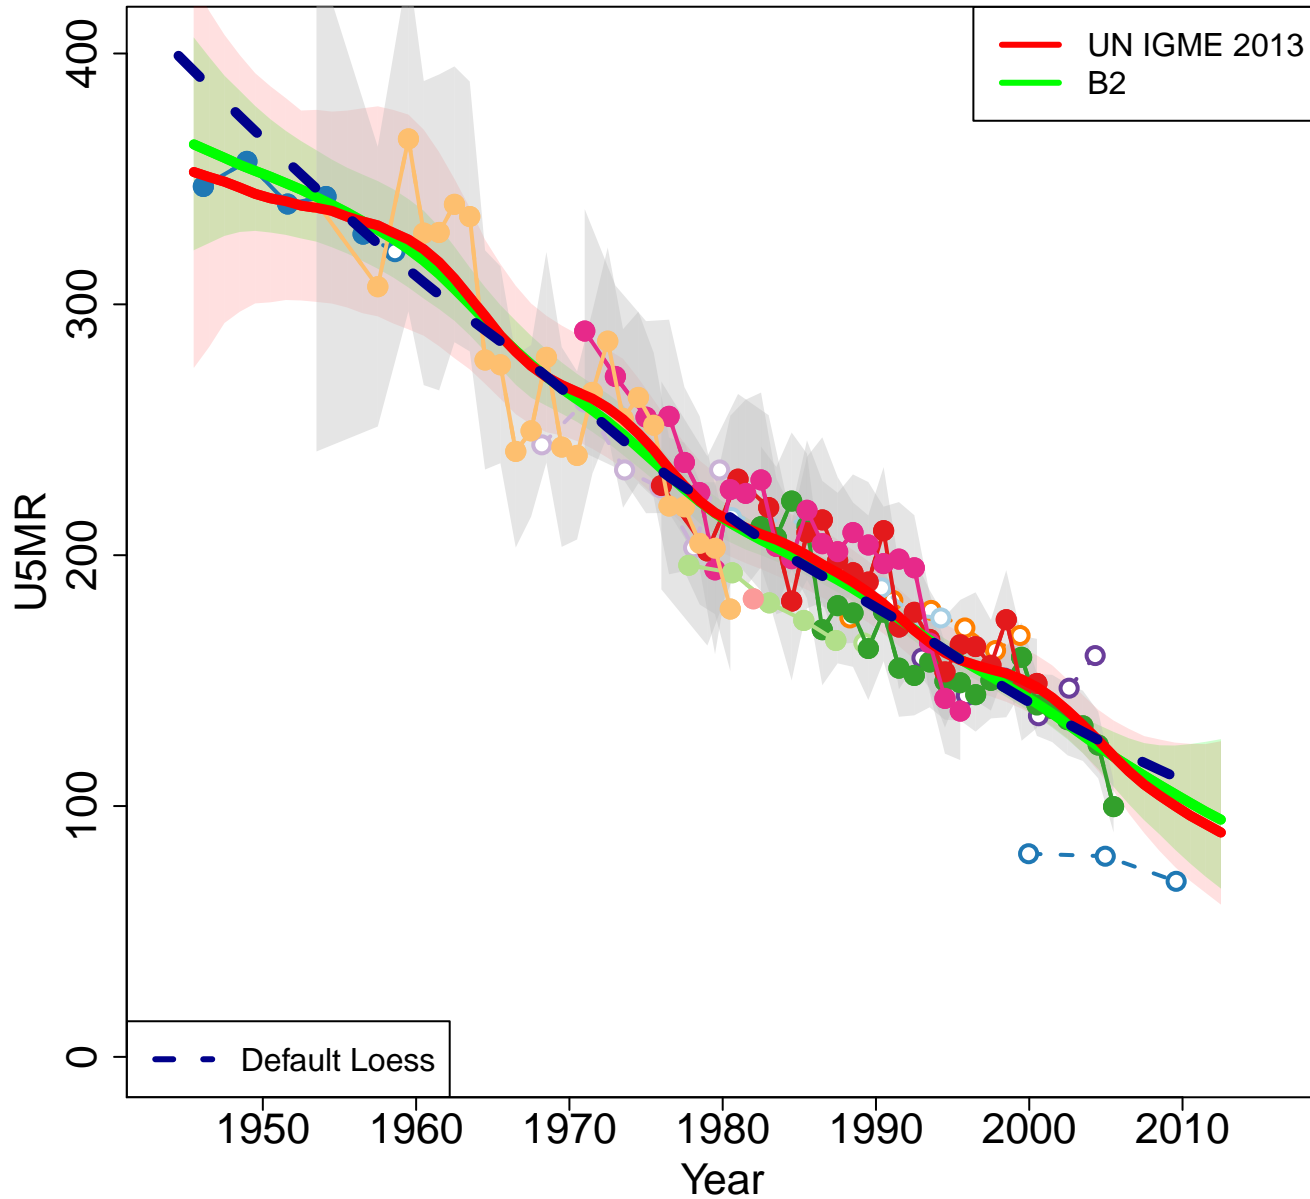

# Zoomed in

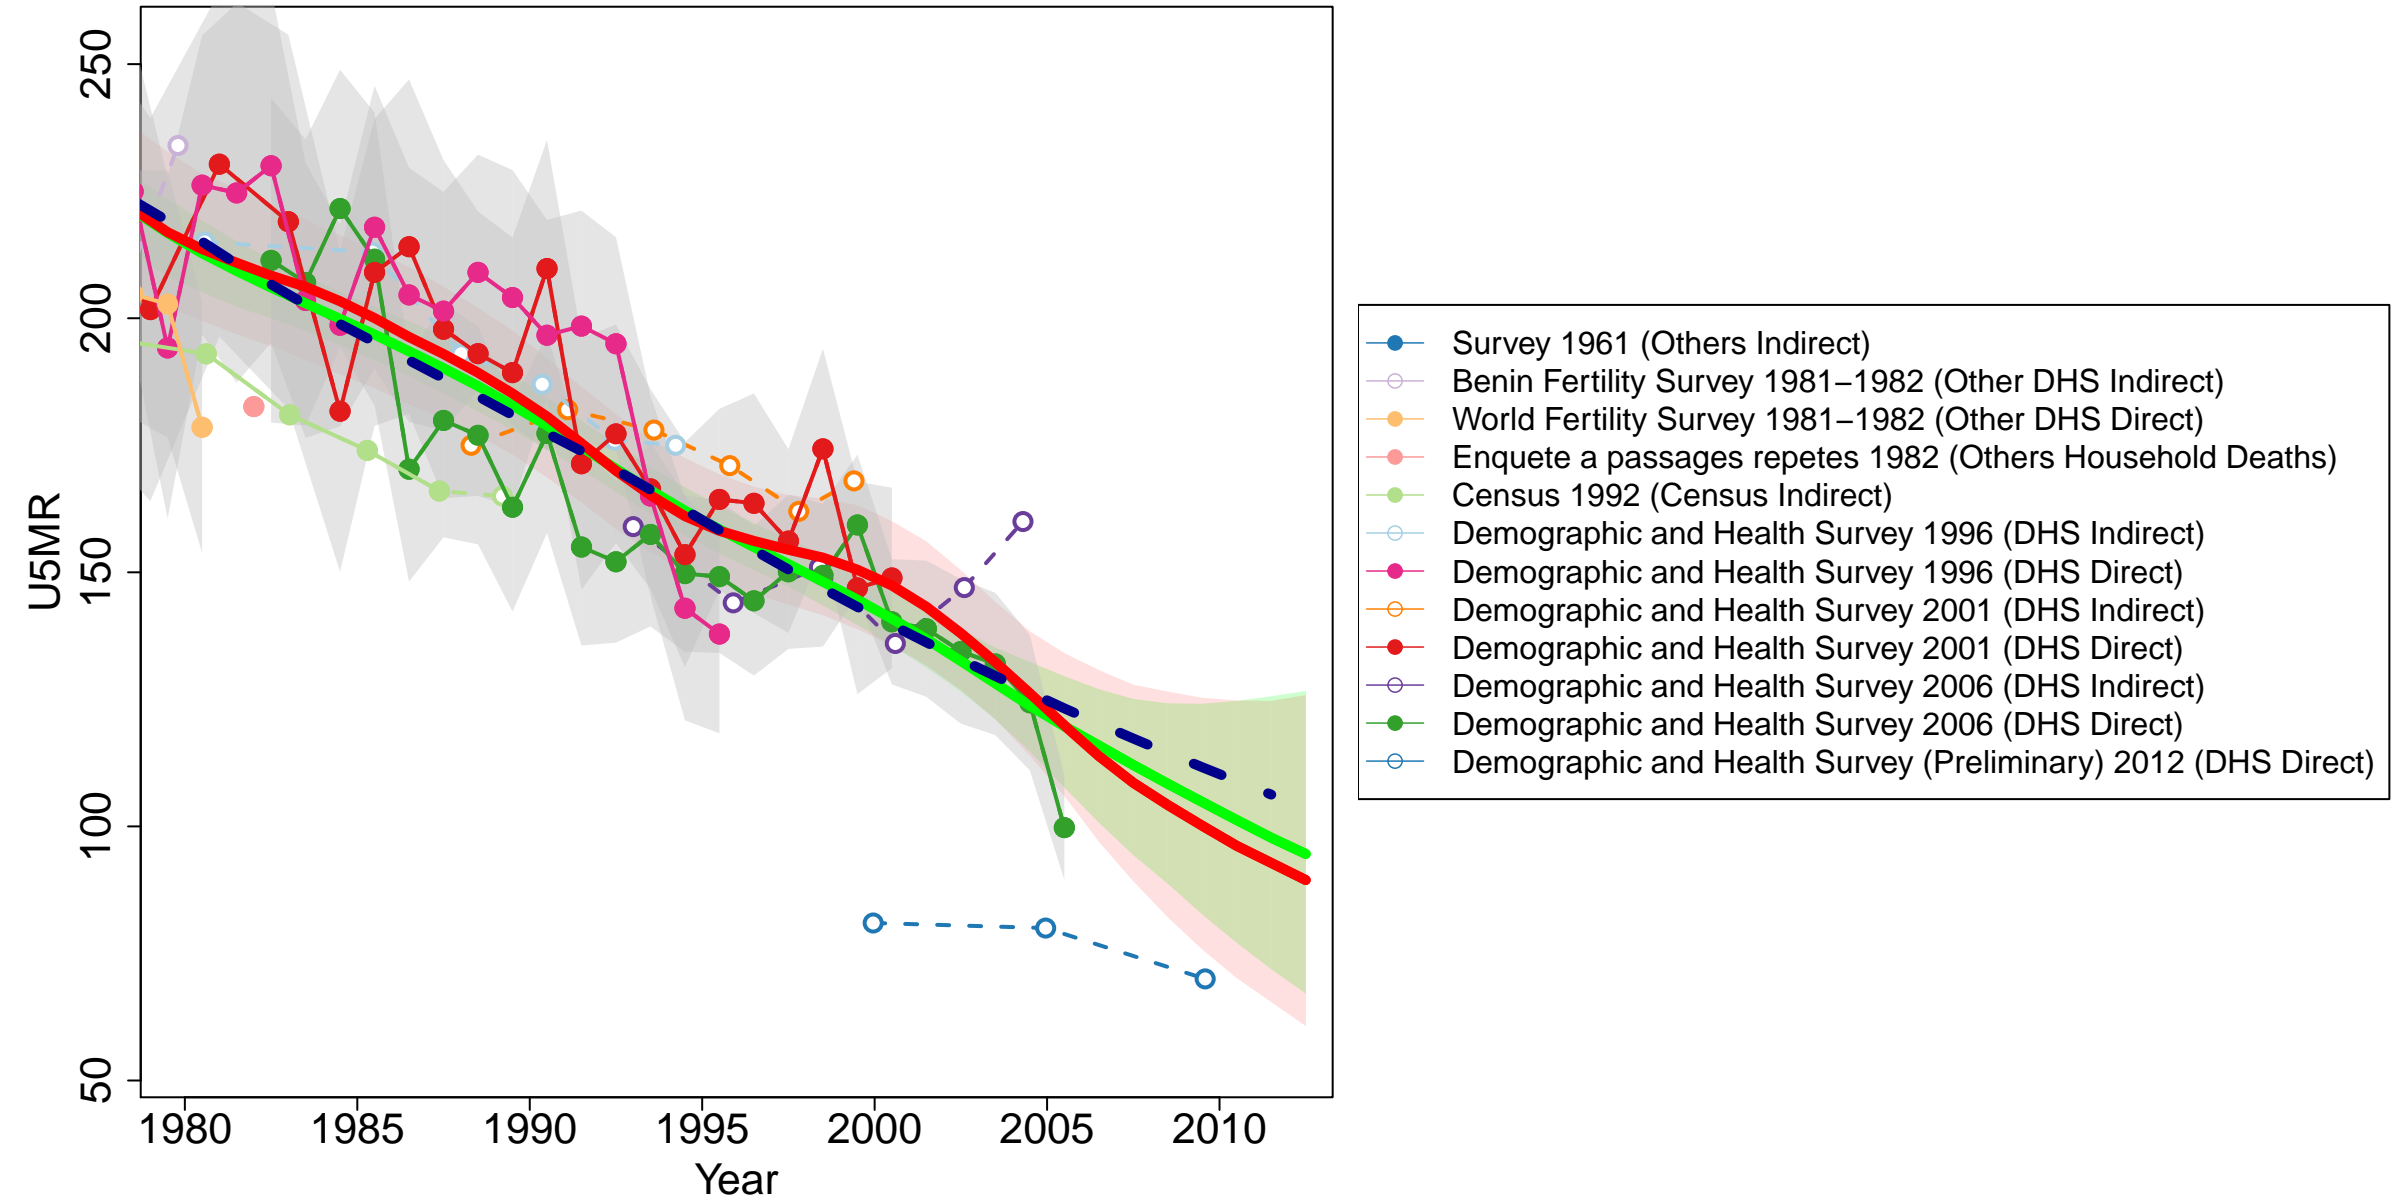

# Burkina Faso

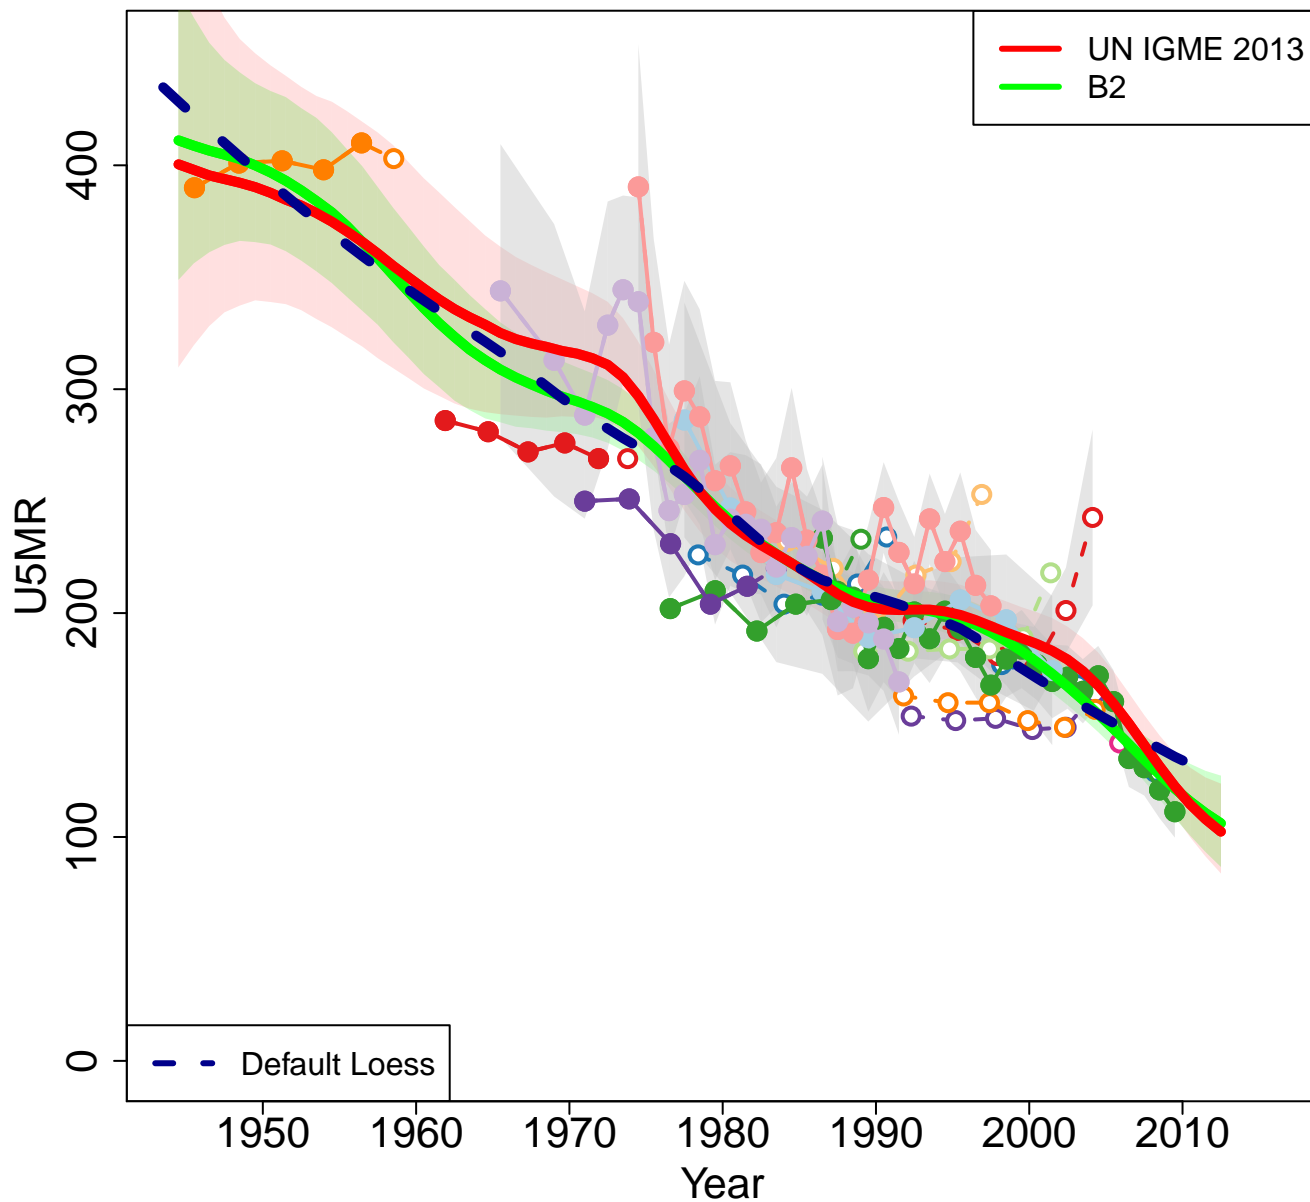

# Zoomed in

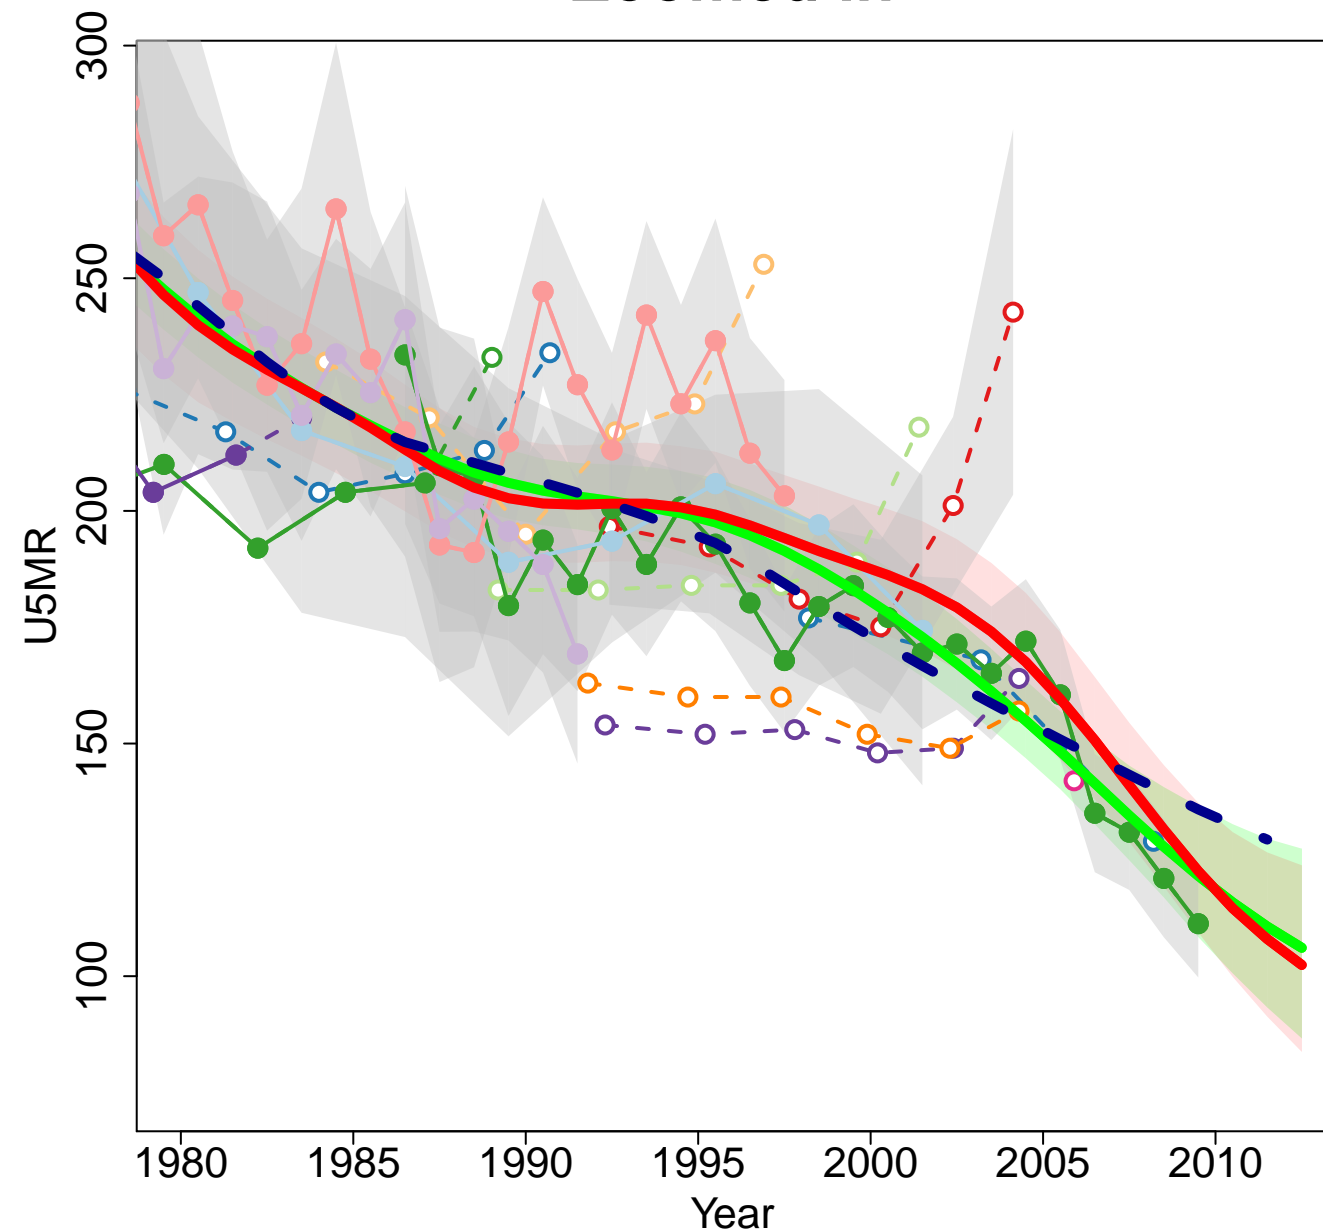

- Survey 1960–1961 (Others Indirect)
- Post-Enumeration Survey 1976 (Others Indirect)
- Census 1985 (Census Indirect)
- Survey 1991 (Others Indirect)
- Demographic and Health Survey 1992–1993 (DHS Indirect)
- Demographic and Health Survey 1992–1993 (DHS Direct)
- Demographic and Health Survey 1998–1999 (DHS Indirect)
- Demographic and Health Survey 1998–1999 (DHS Direct)
- Demographic and Health Survey 2003 (DHS Indirect)
- Demographic and Health Survey 2003 (DHS Direct)
- Recensement General de la Population et de l'Habitat (RGPH) 2005 (Others Household)
- Census 2006 (Census Indirect)
- Multiple Indicator Cluster Survey 2006 (MICS Indirect)
- Recensement General de la Population et de l'Habitat (RGPH) 2006 (Census Indirect)
- Demographic and Health Survey 2010 (DHS Direct)
- Demographic and Health Survey (Preliminary) 2010 (DHS Direct)

# Burundi

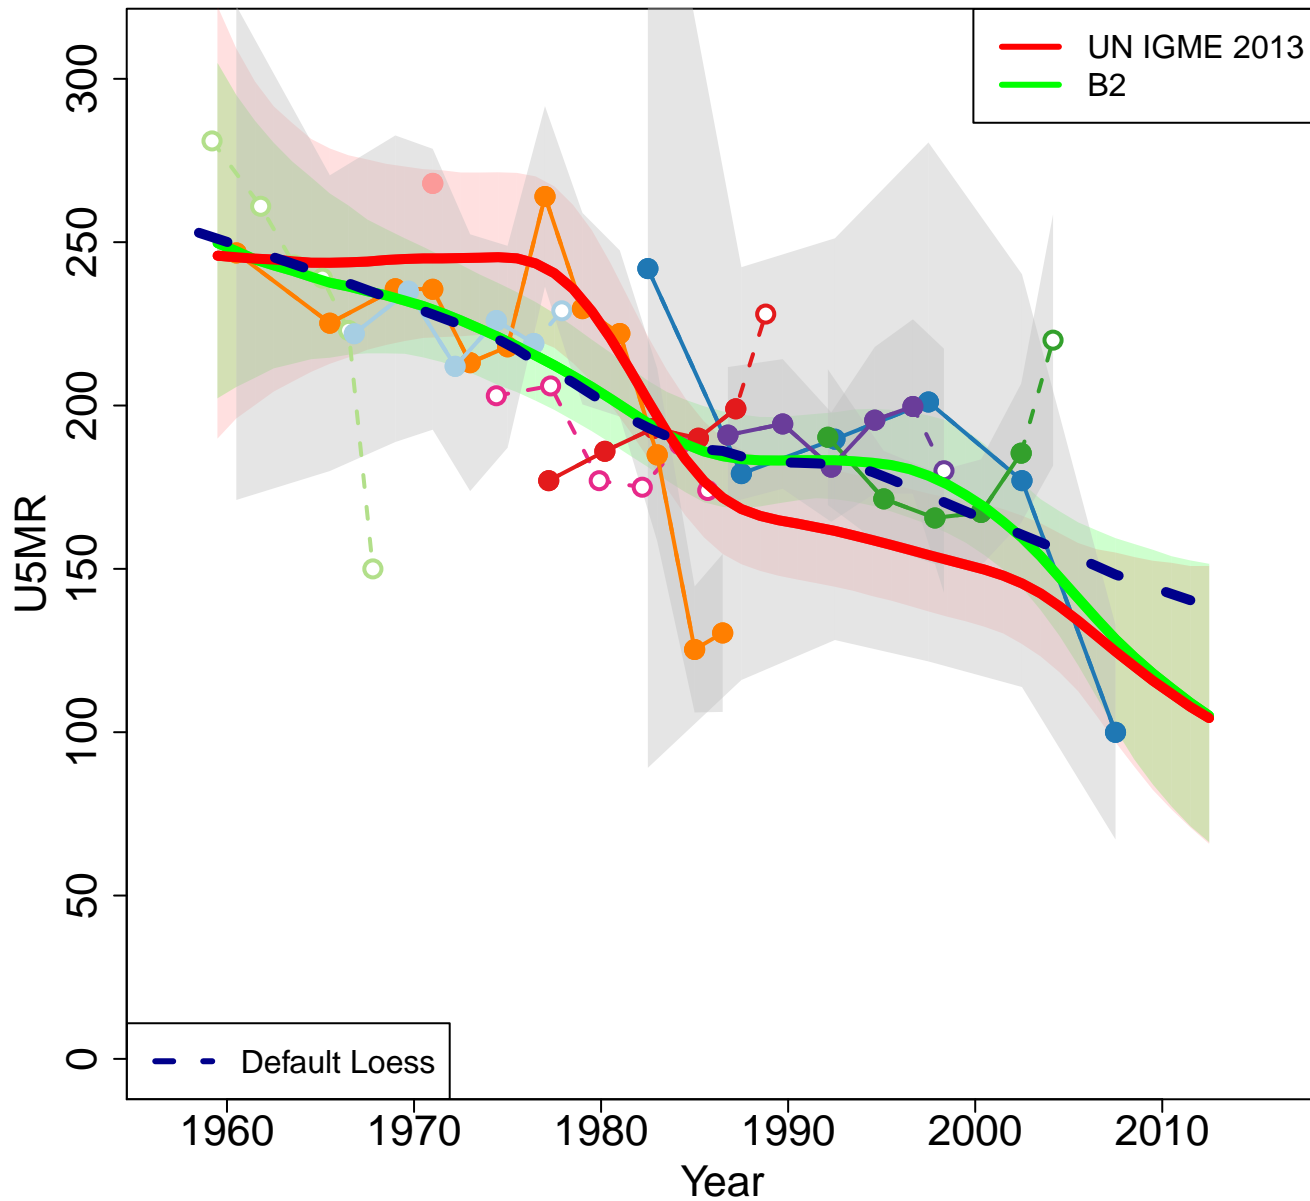

# Zoomed in

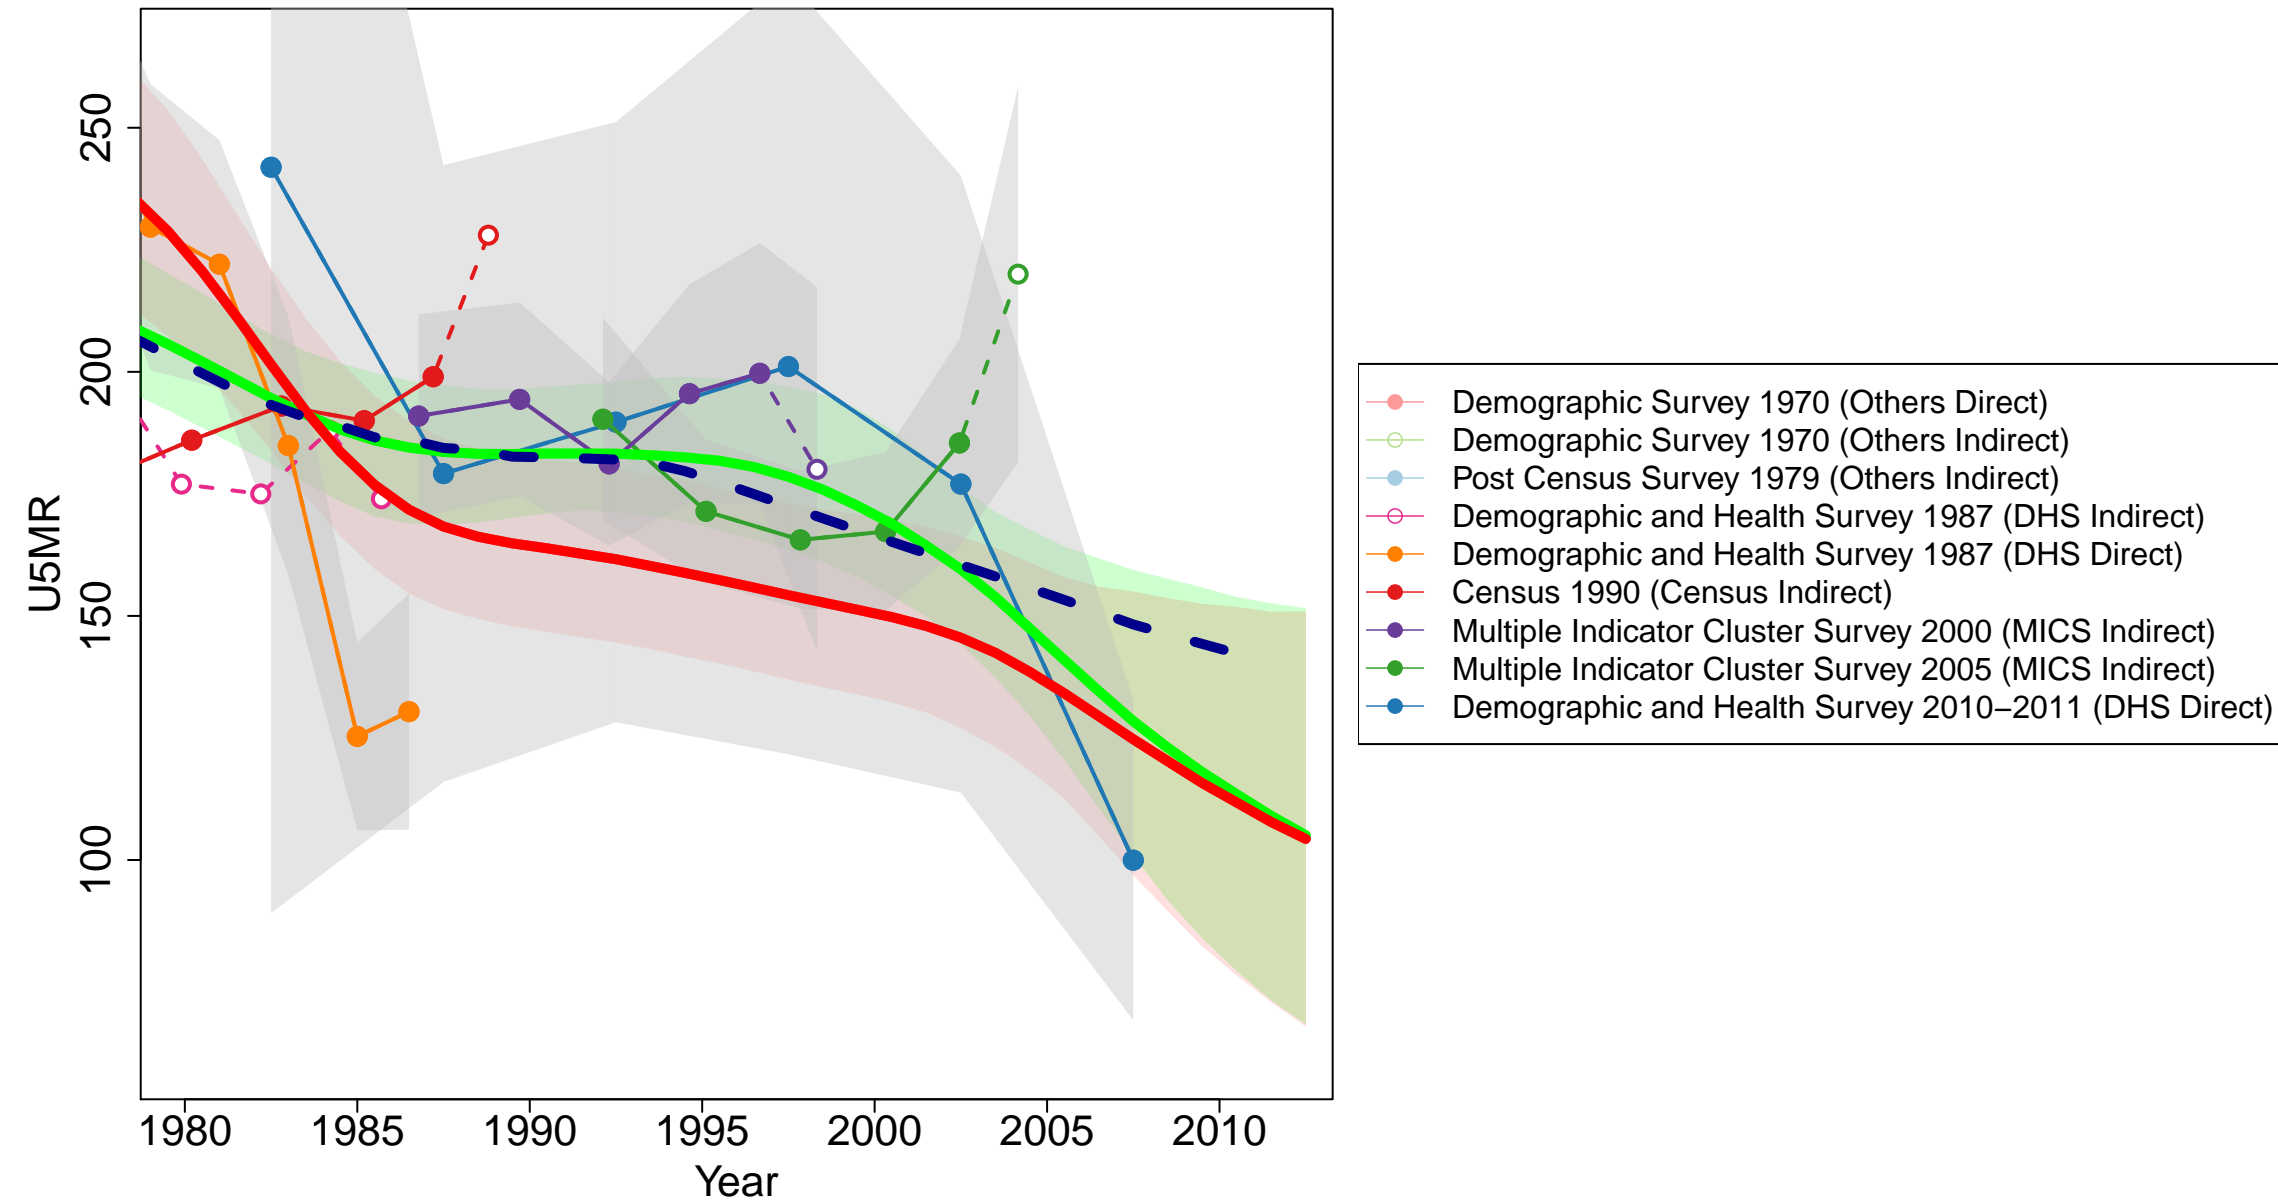



# Chad

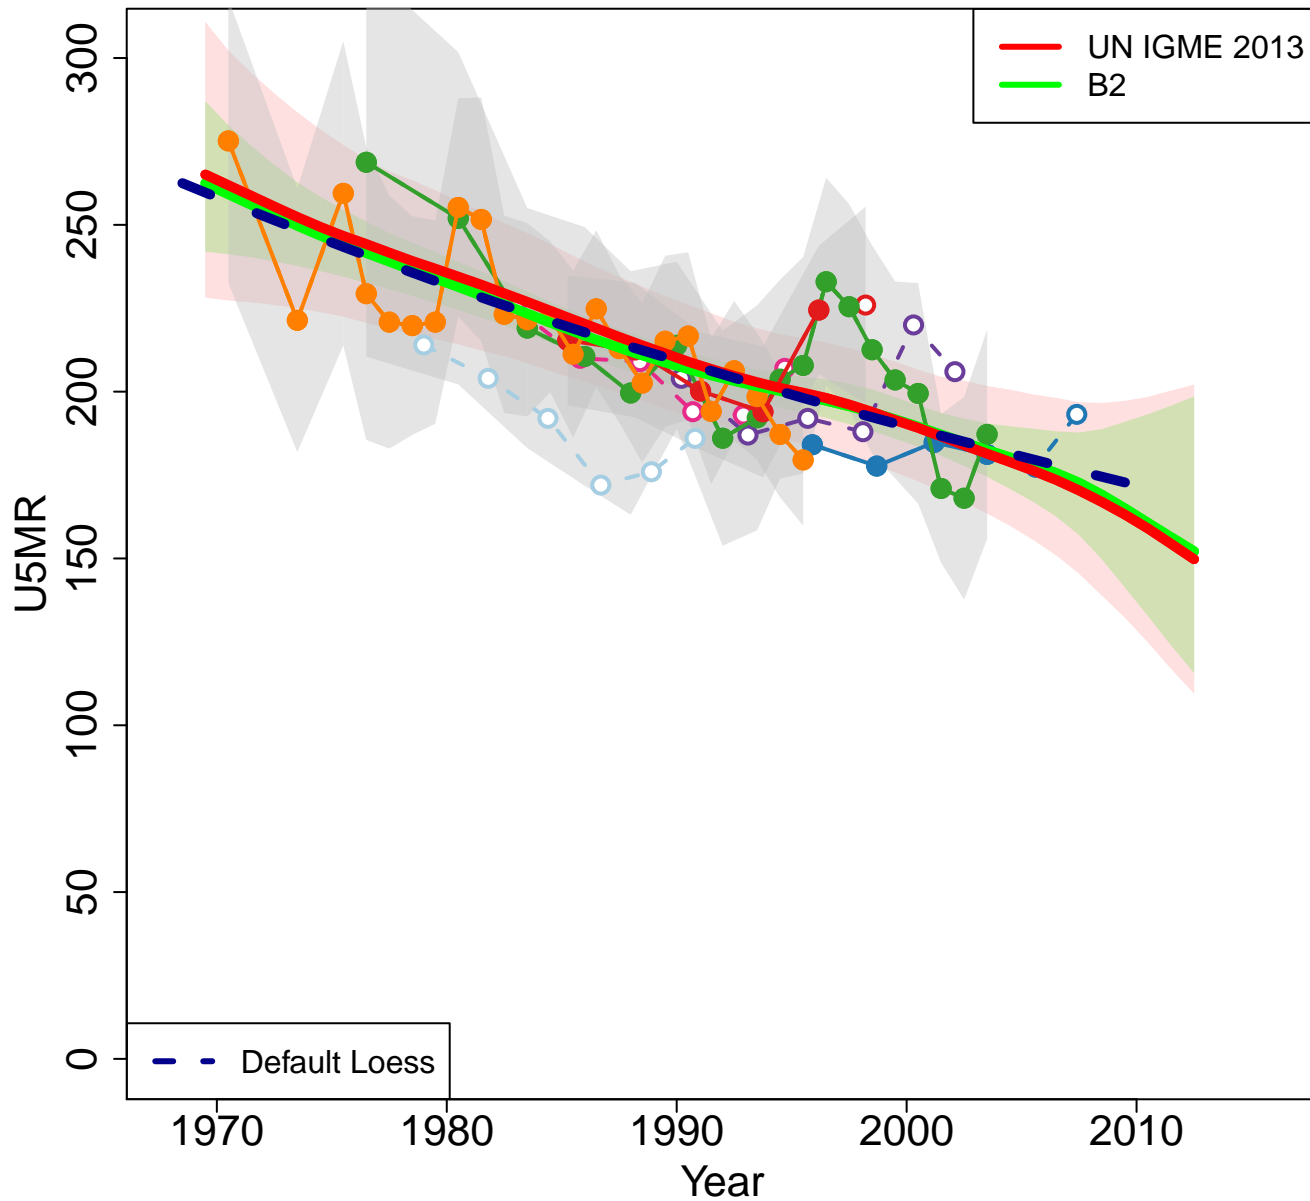

# Zoomed in

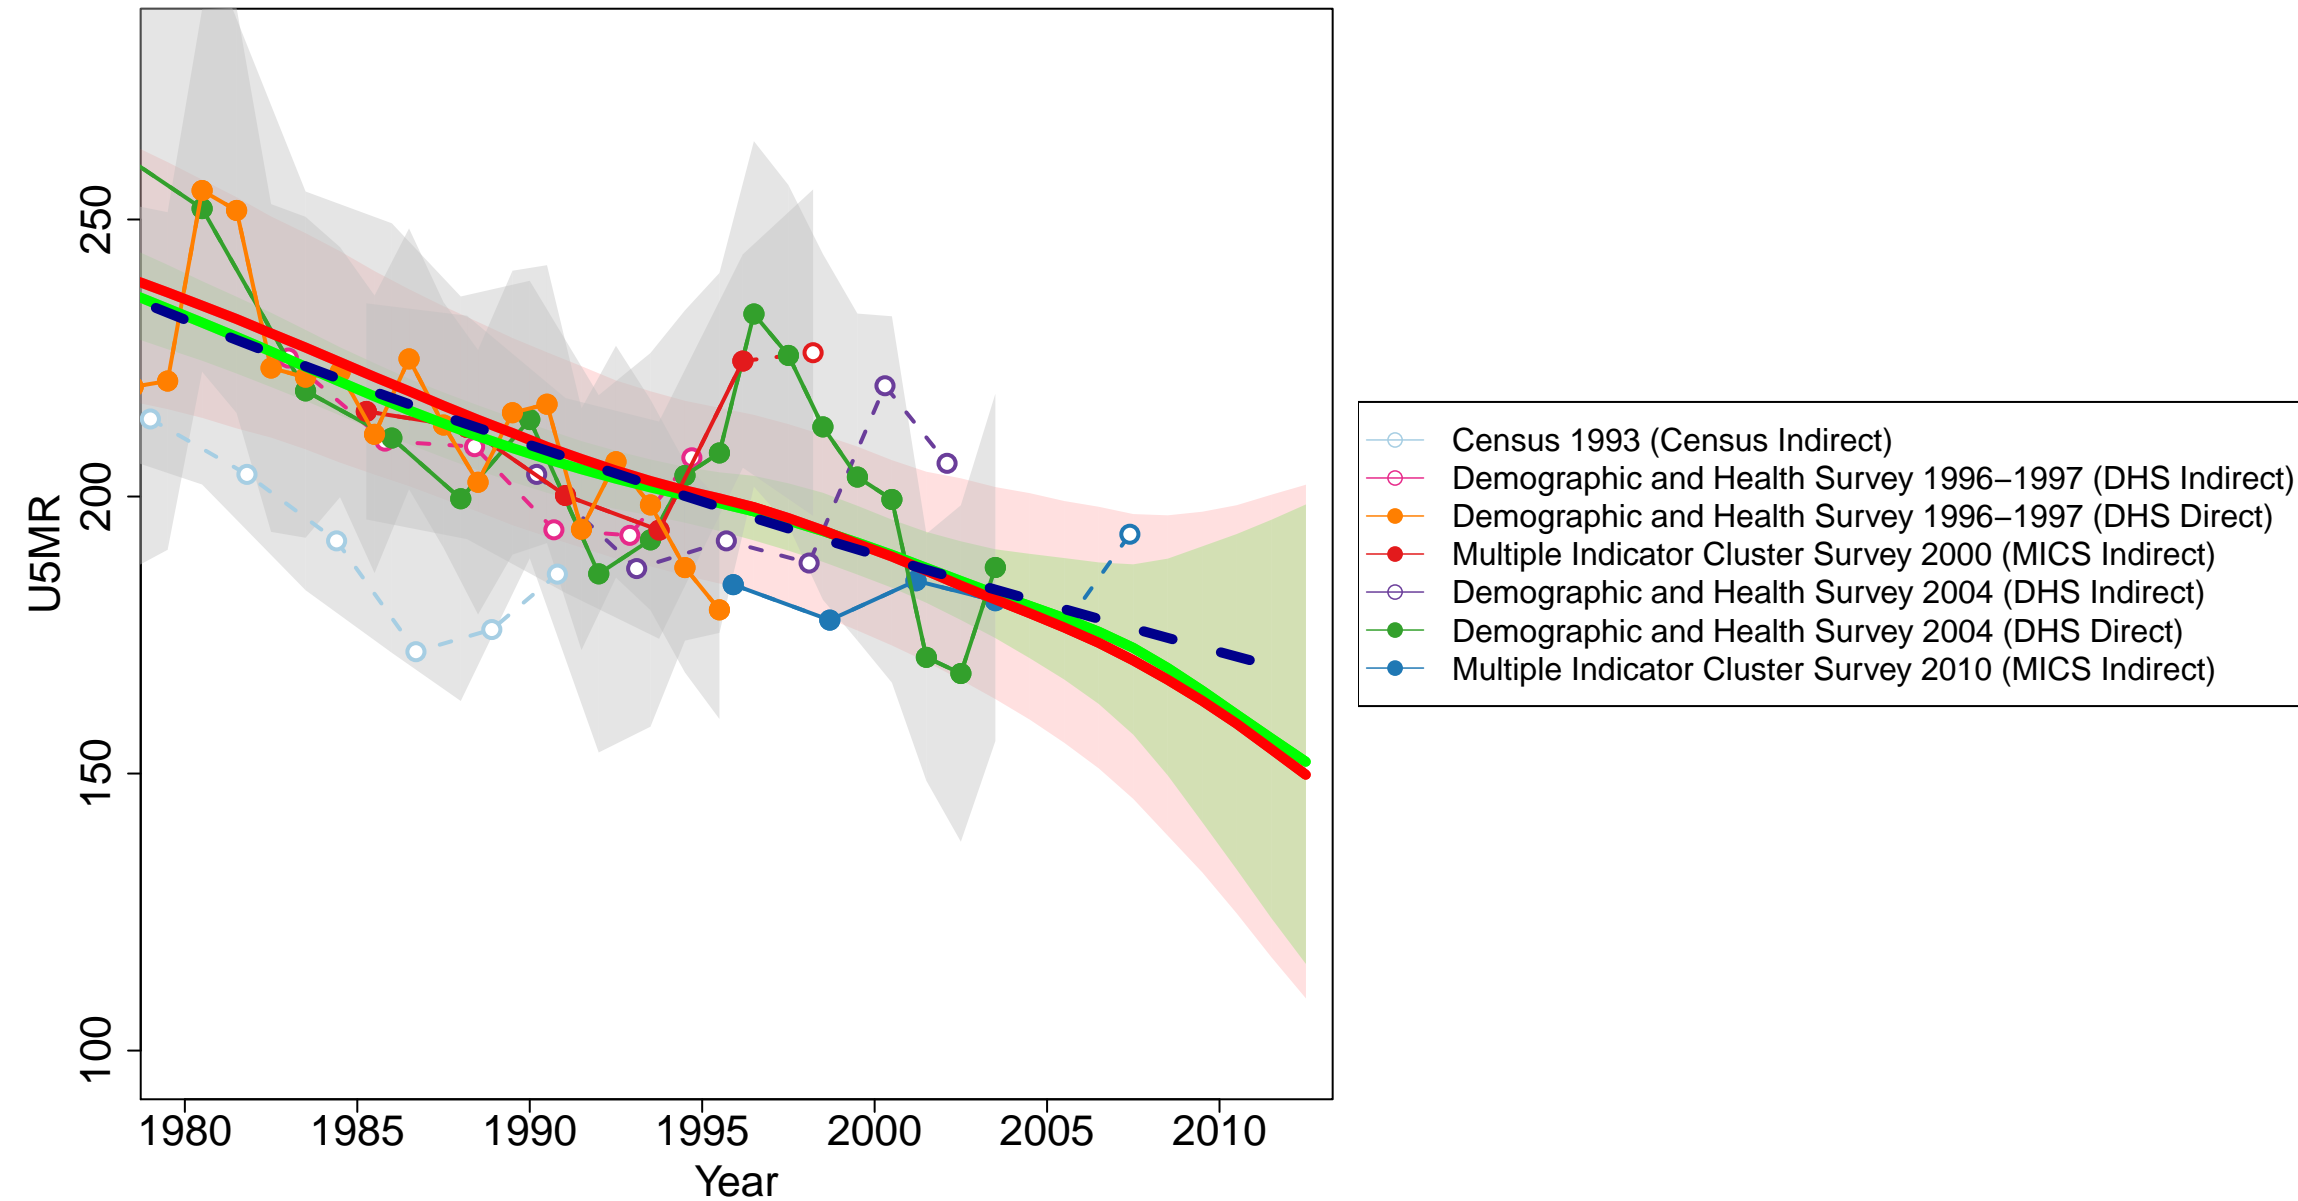

# Congo

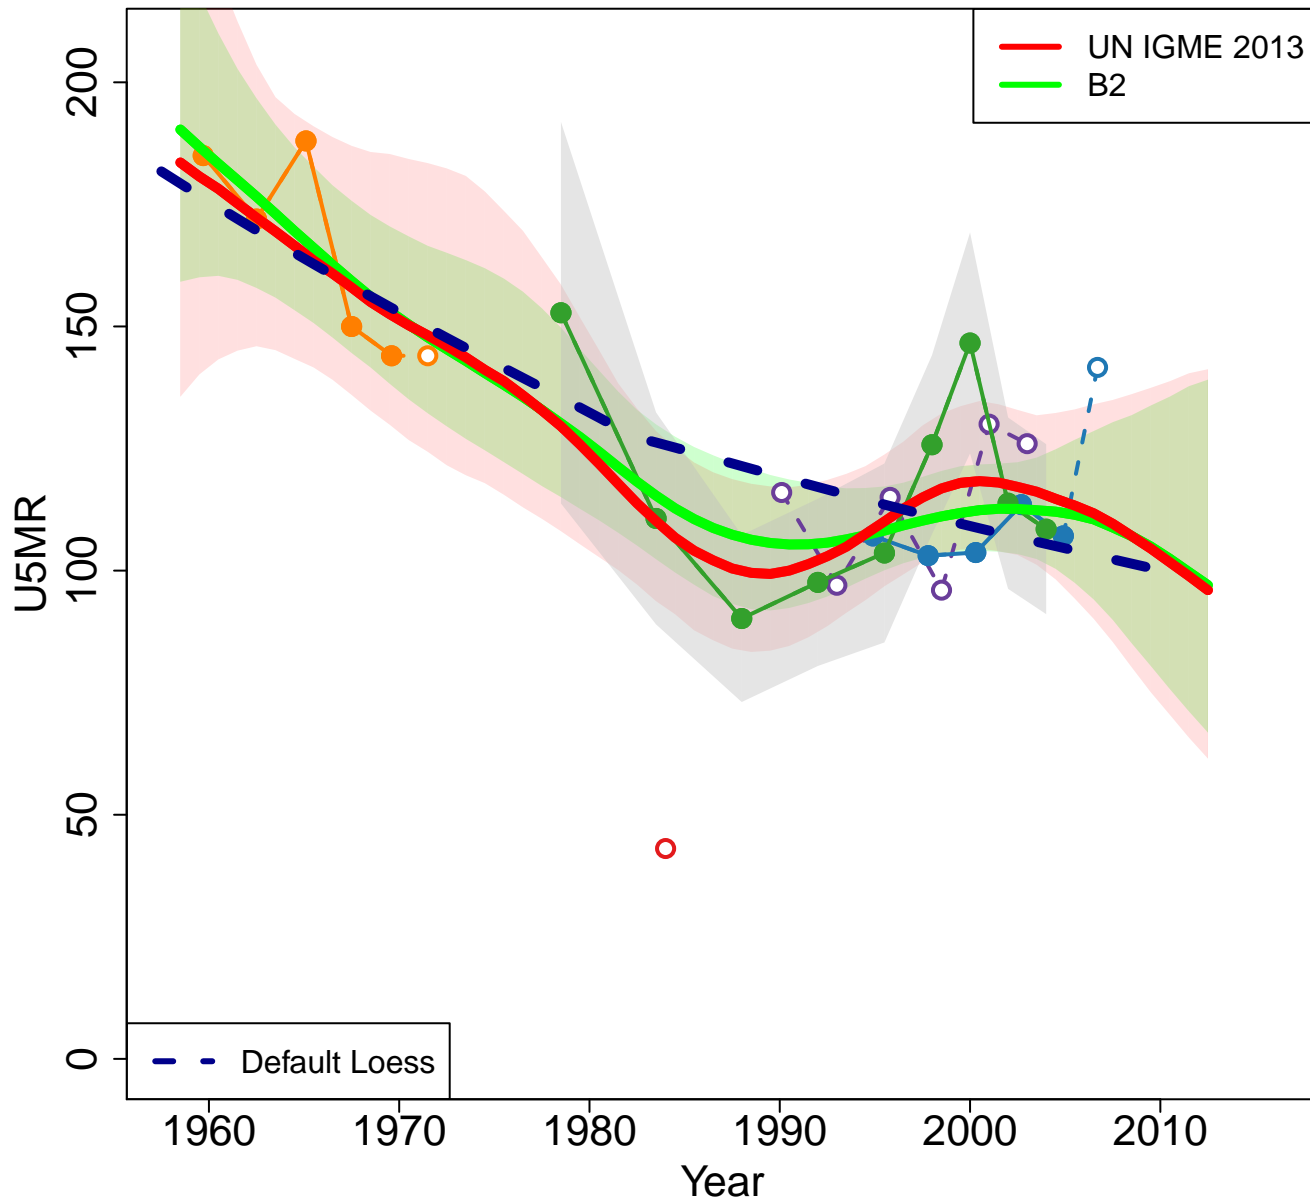

# Zoomed in

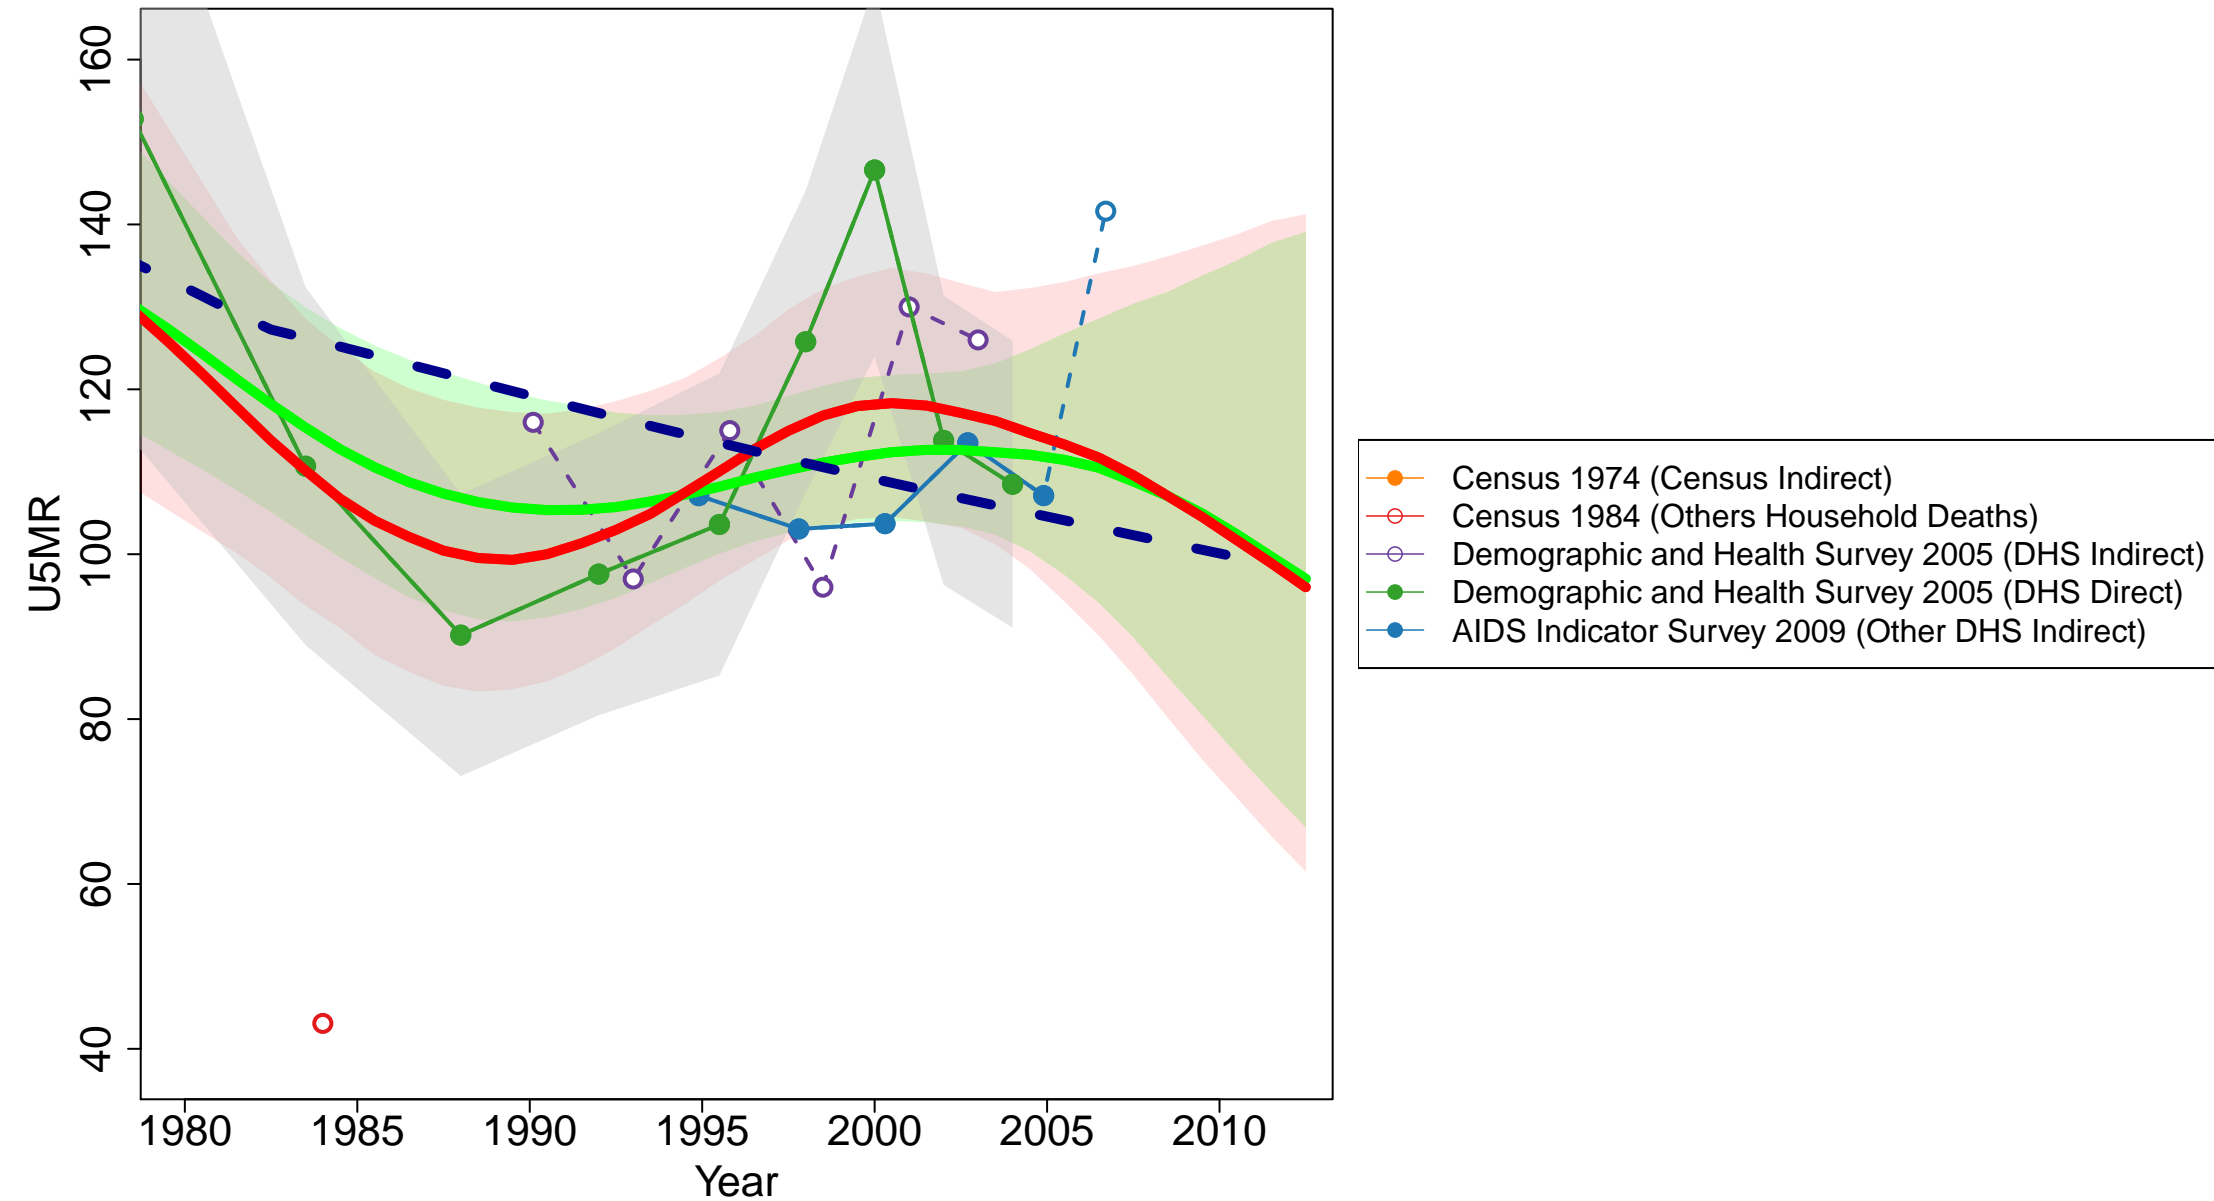



# Eritrea

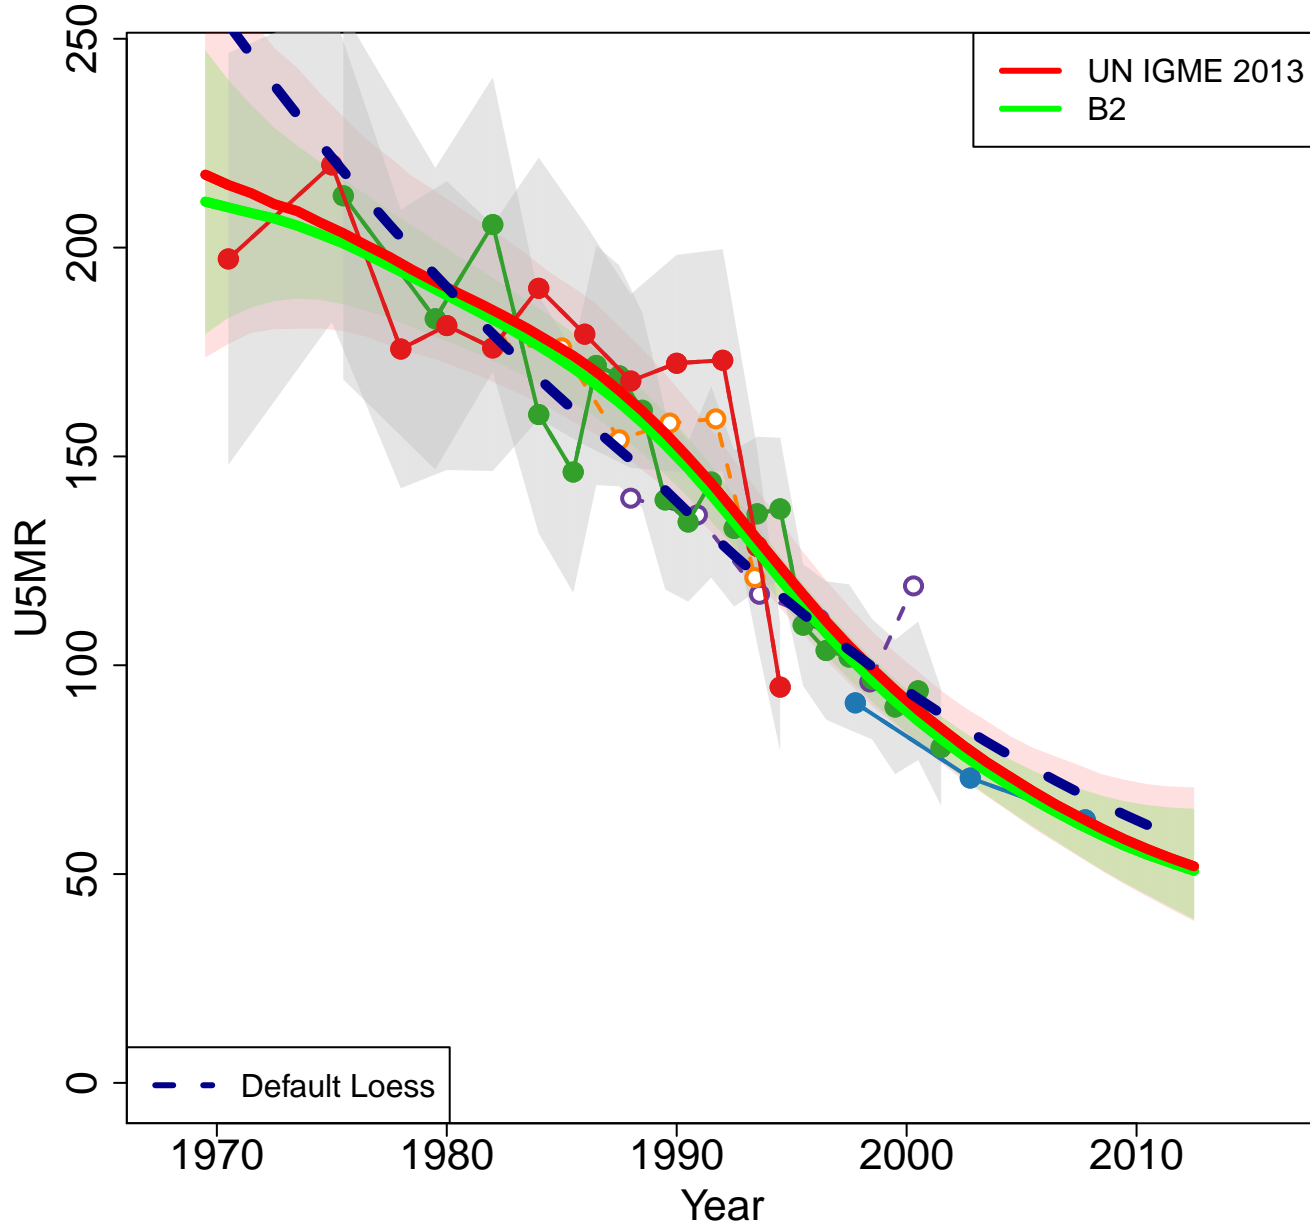

# Zoomed in

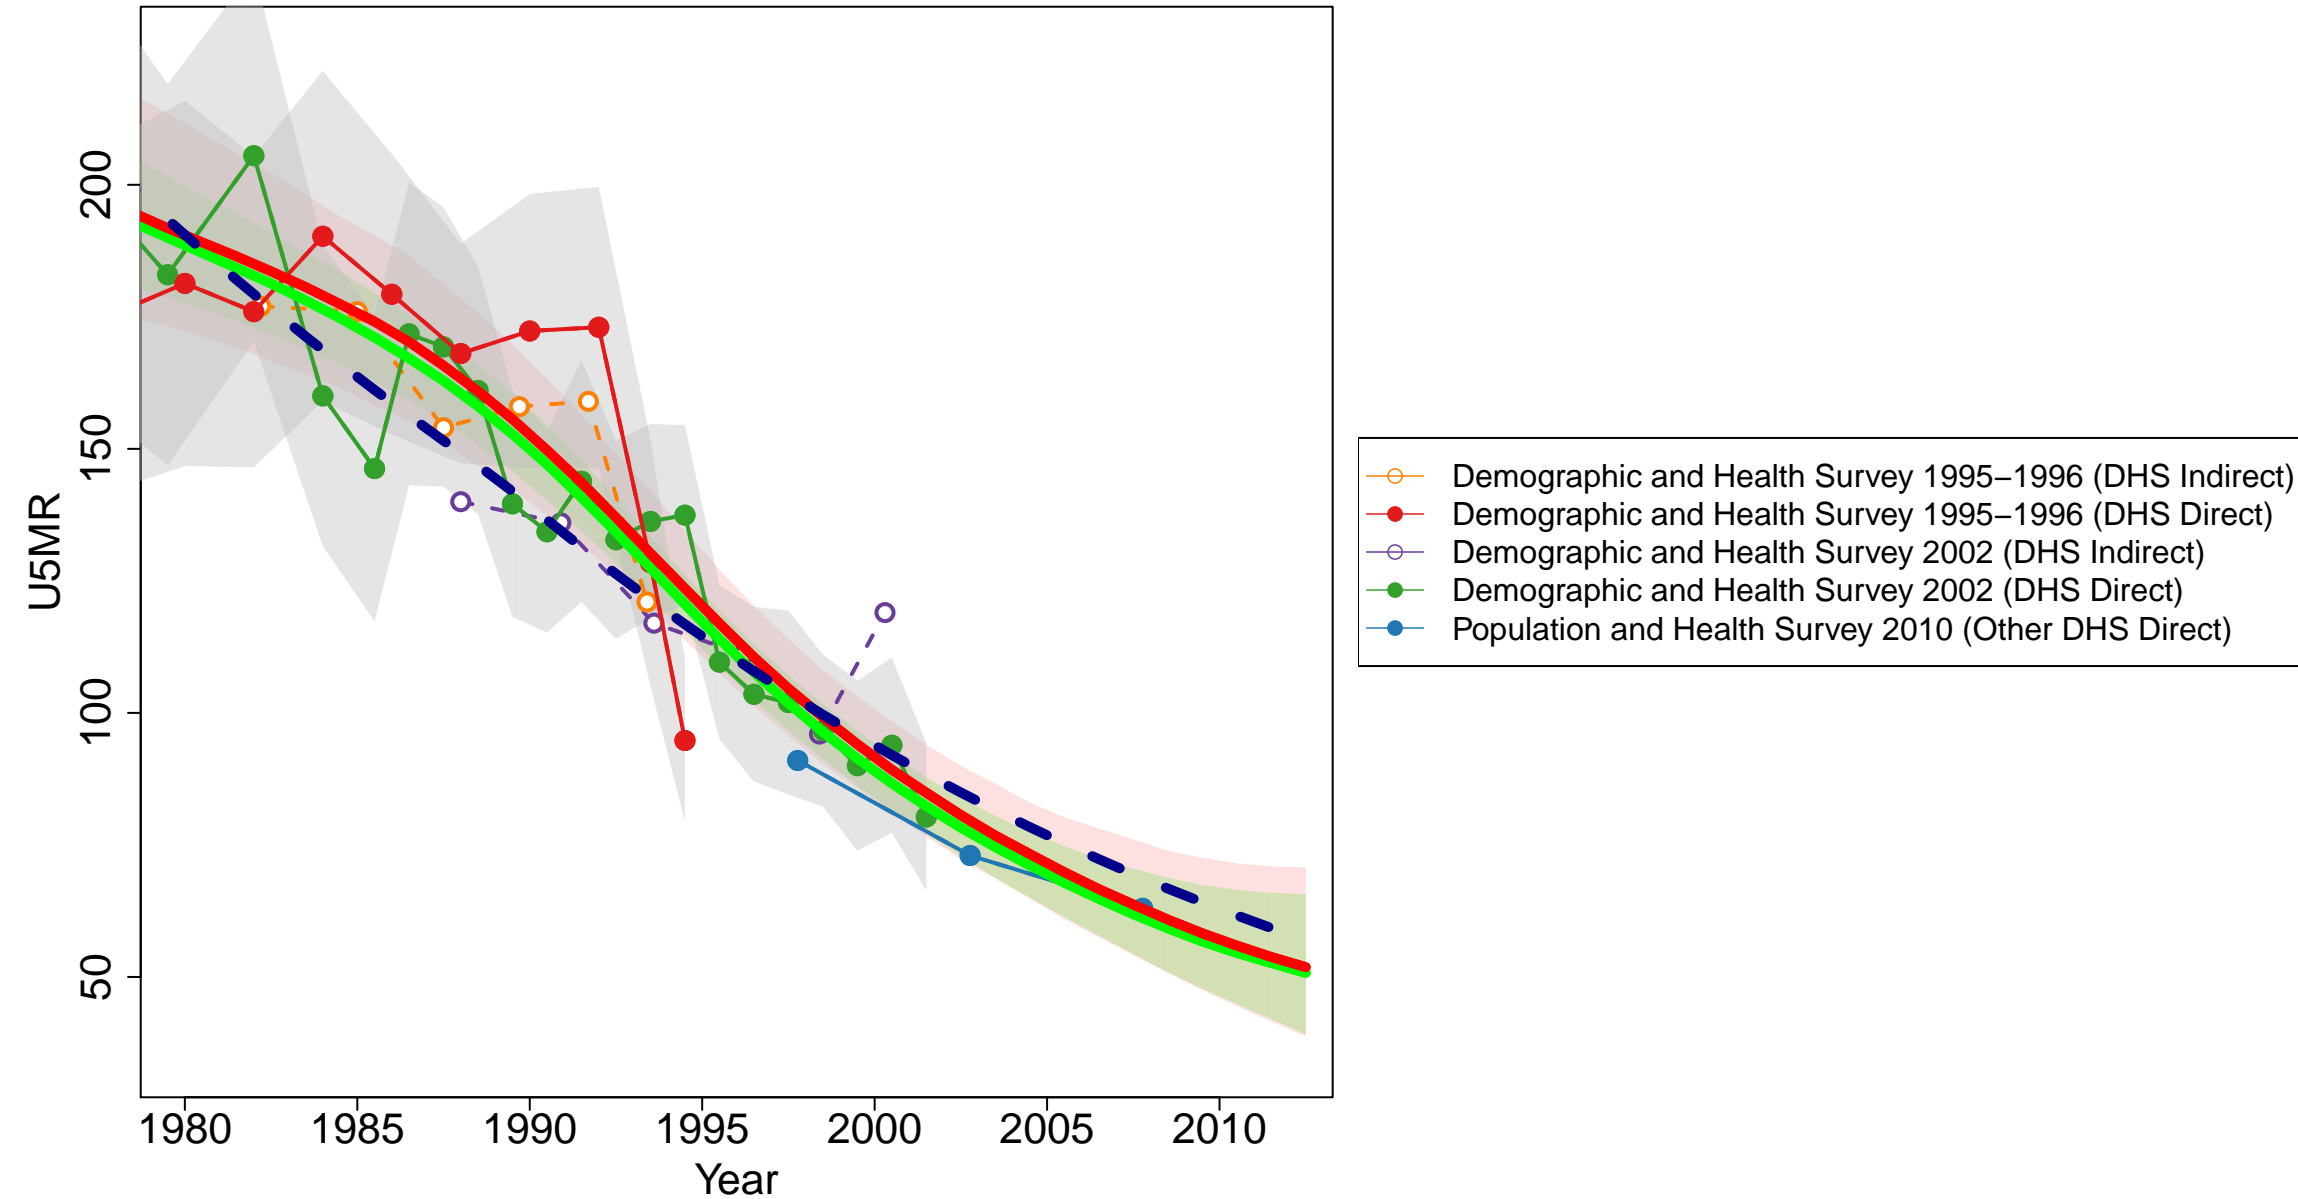

# Gambia The

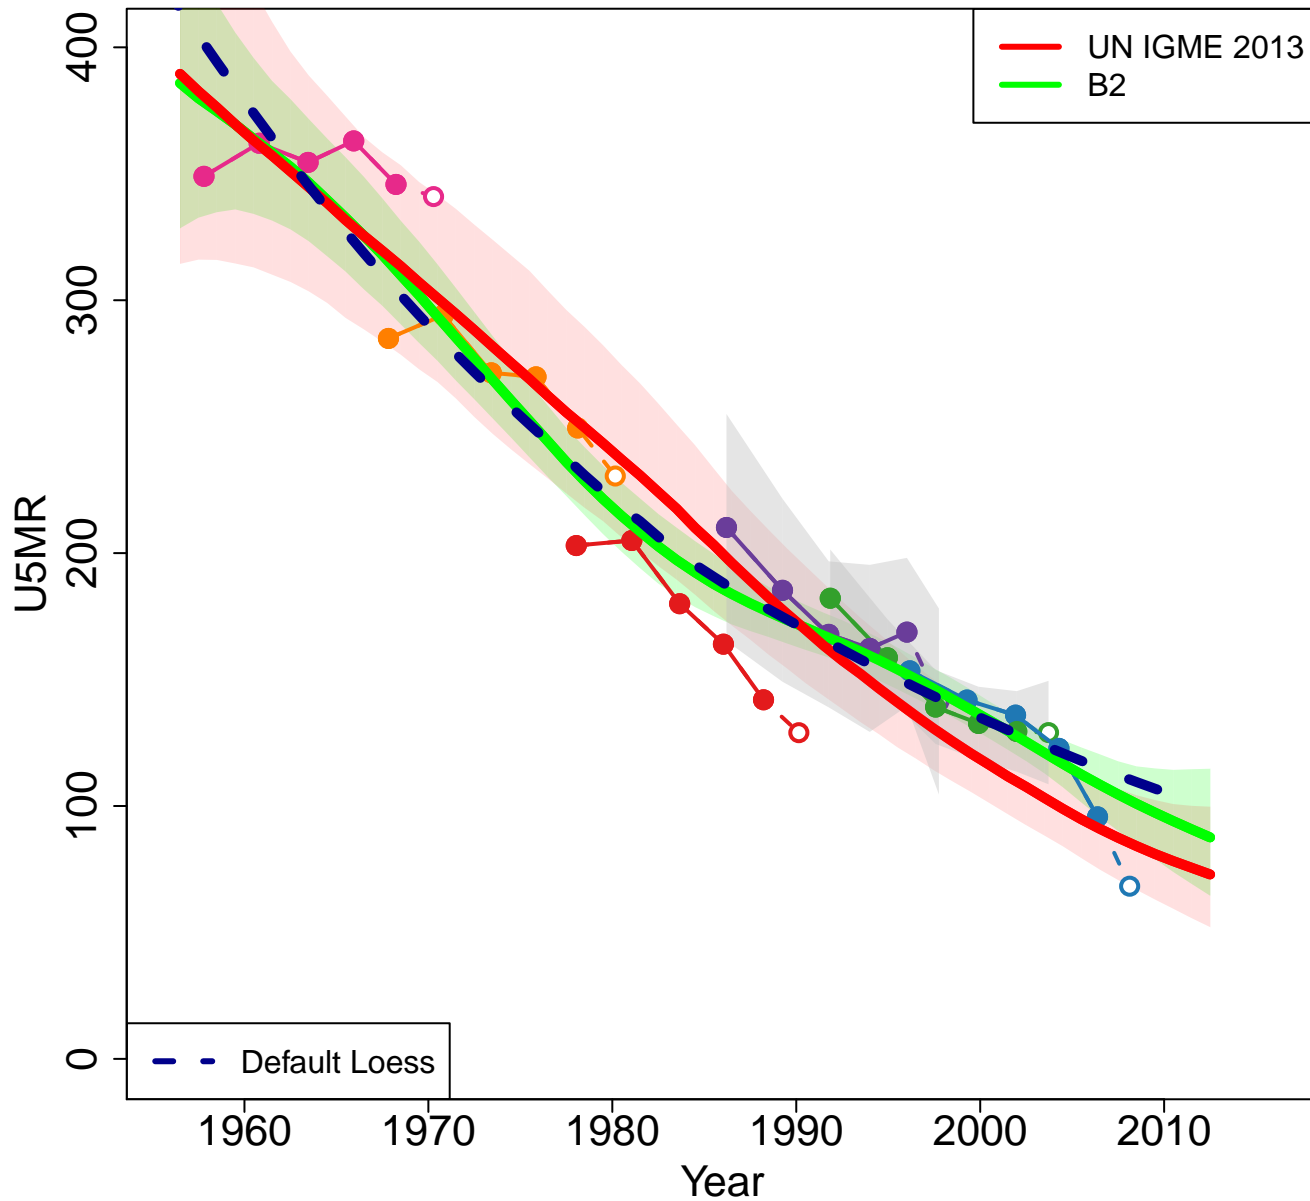

# Zoomed in

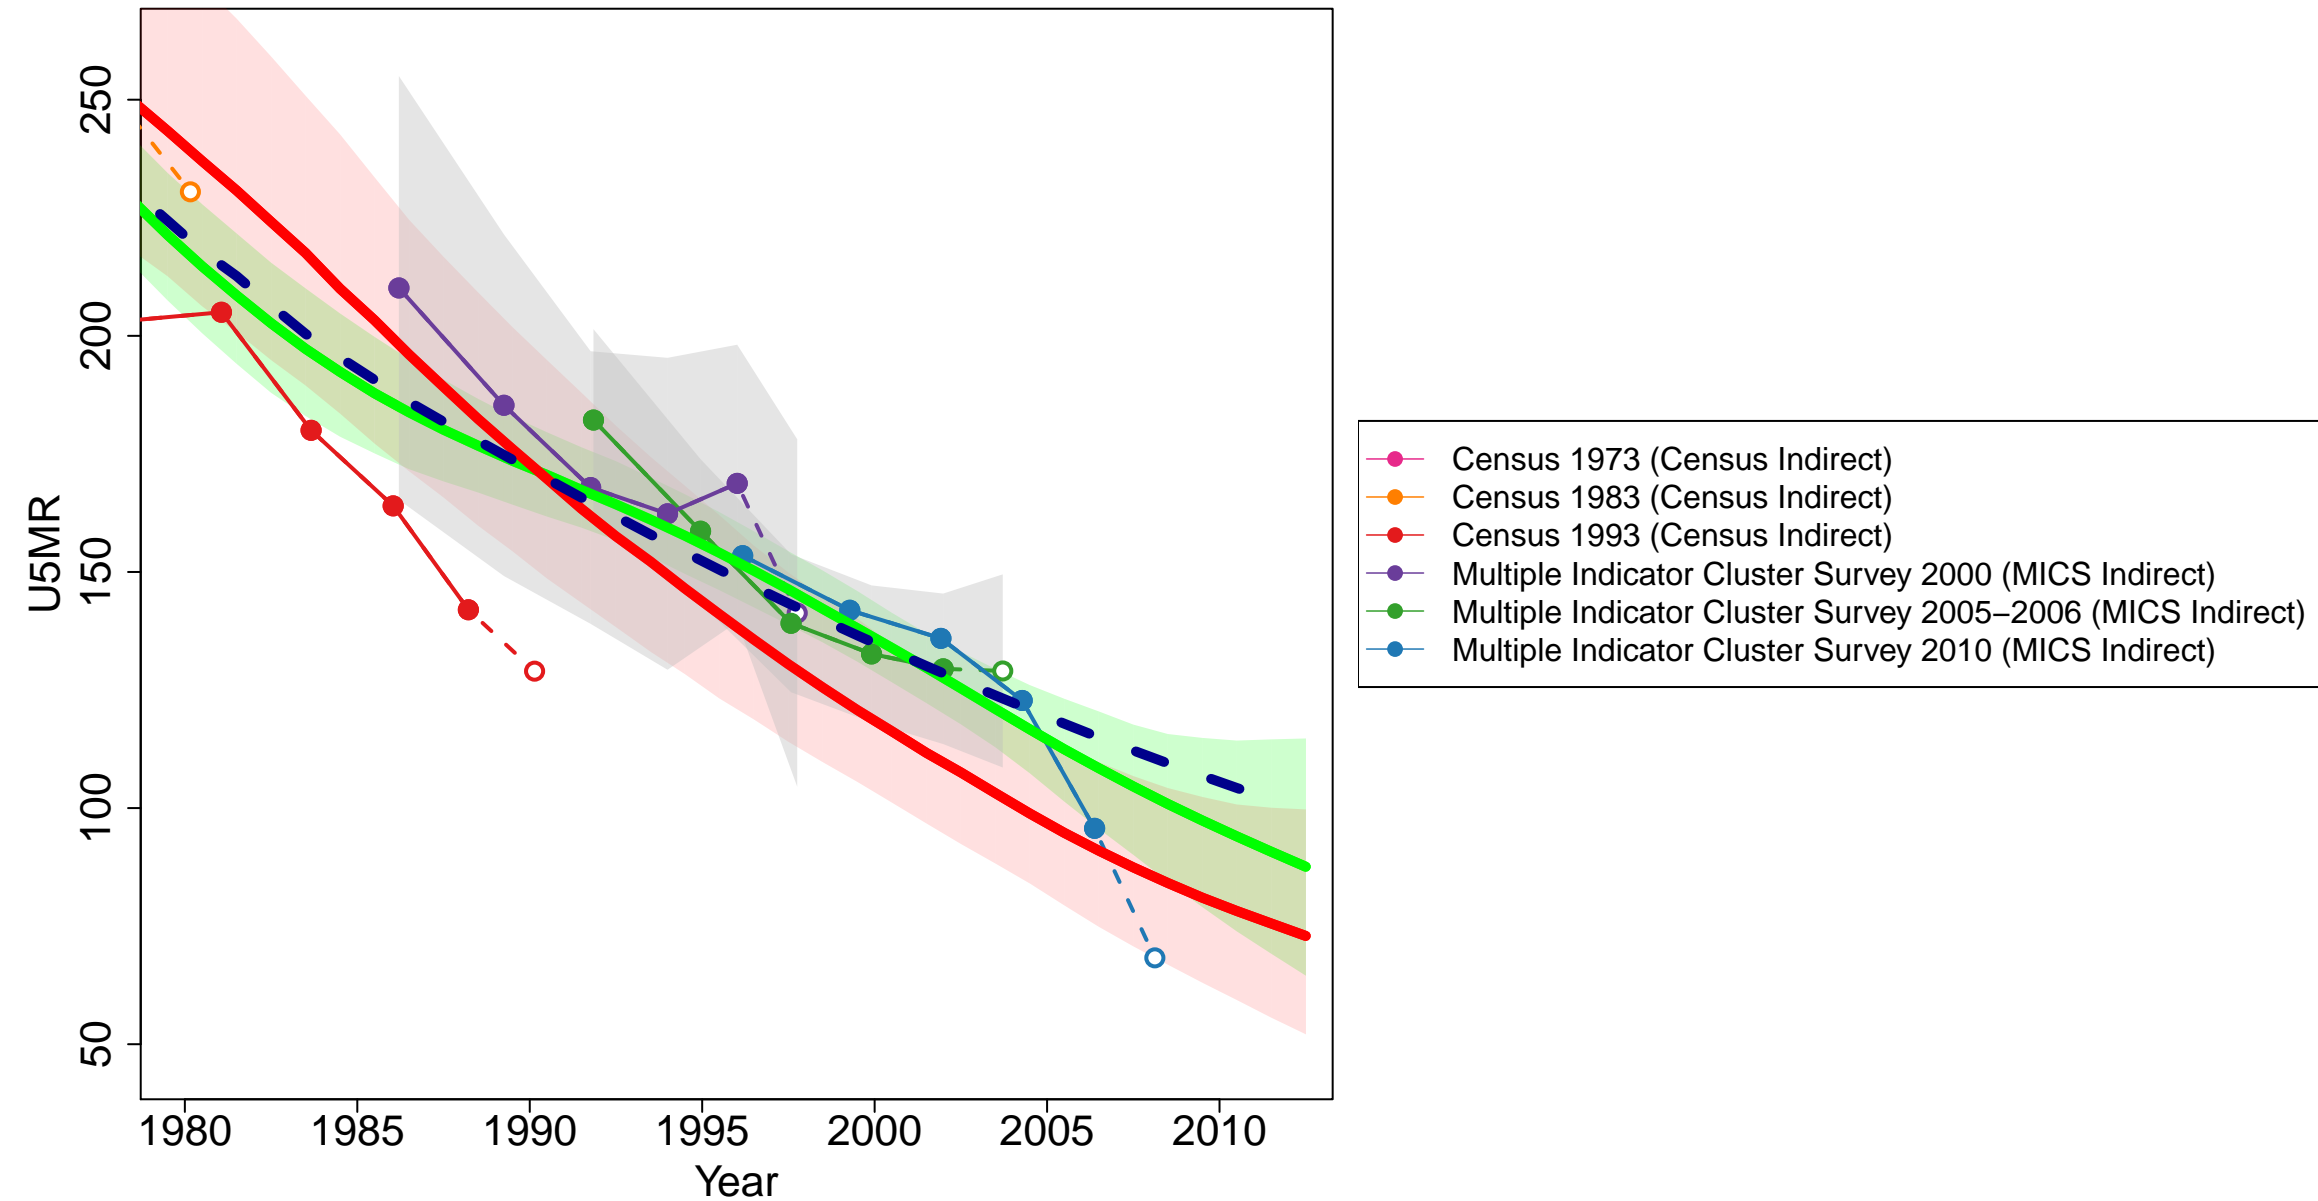

# Guinea

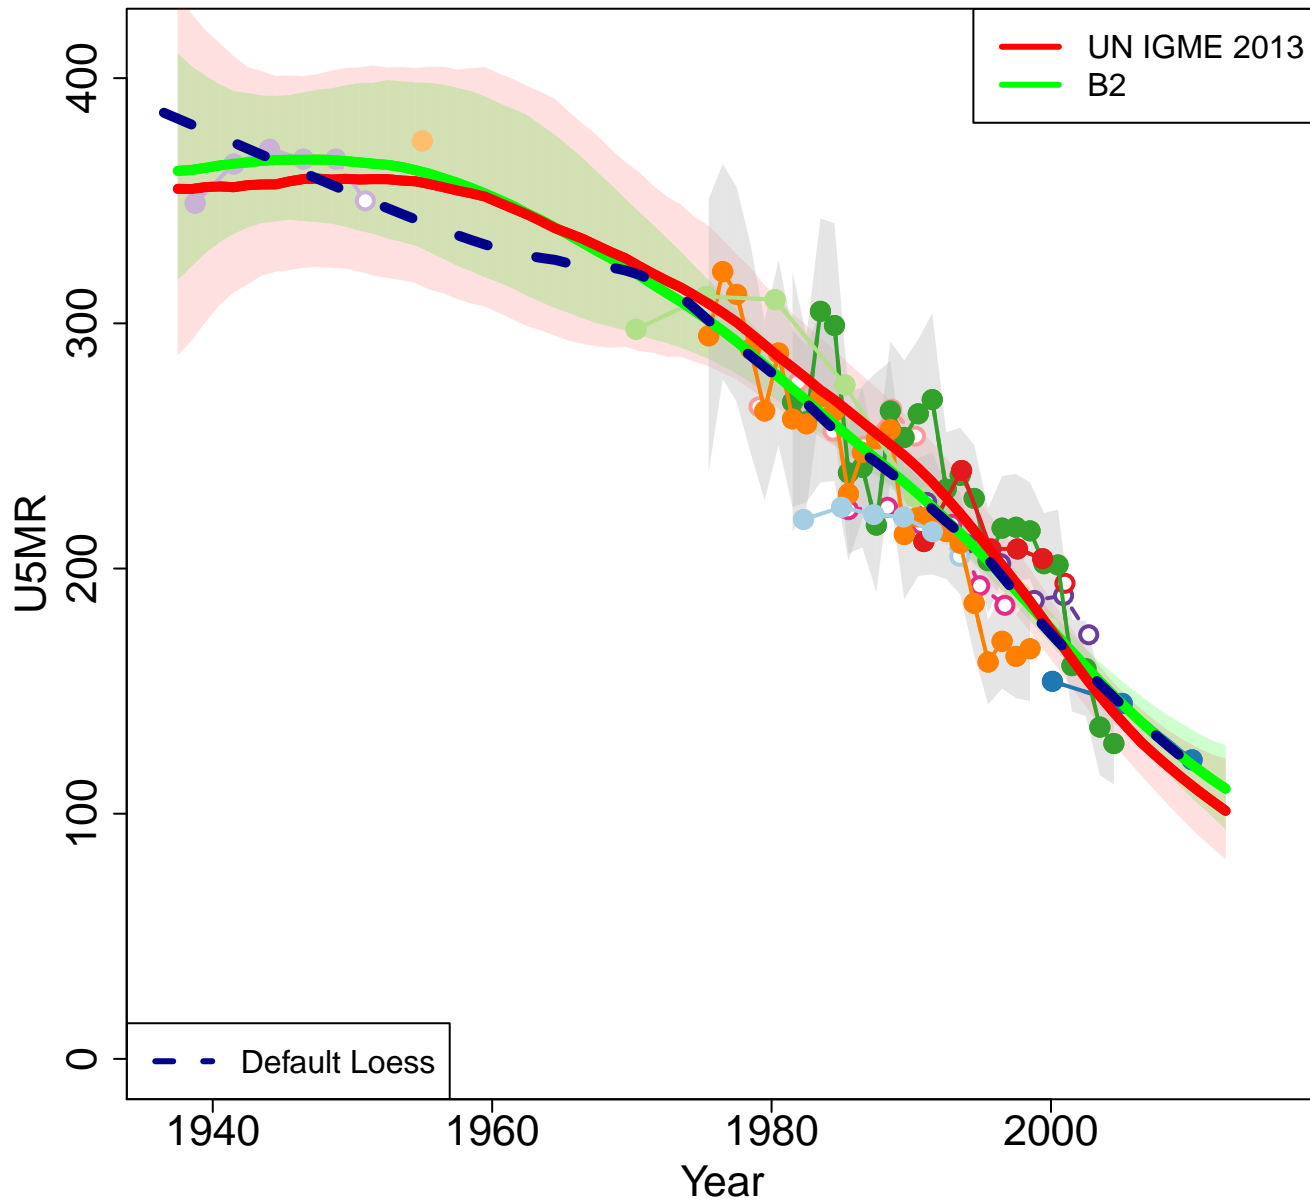

# Zoomed in

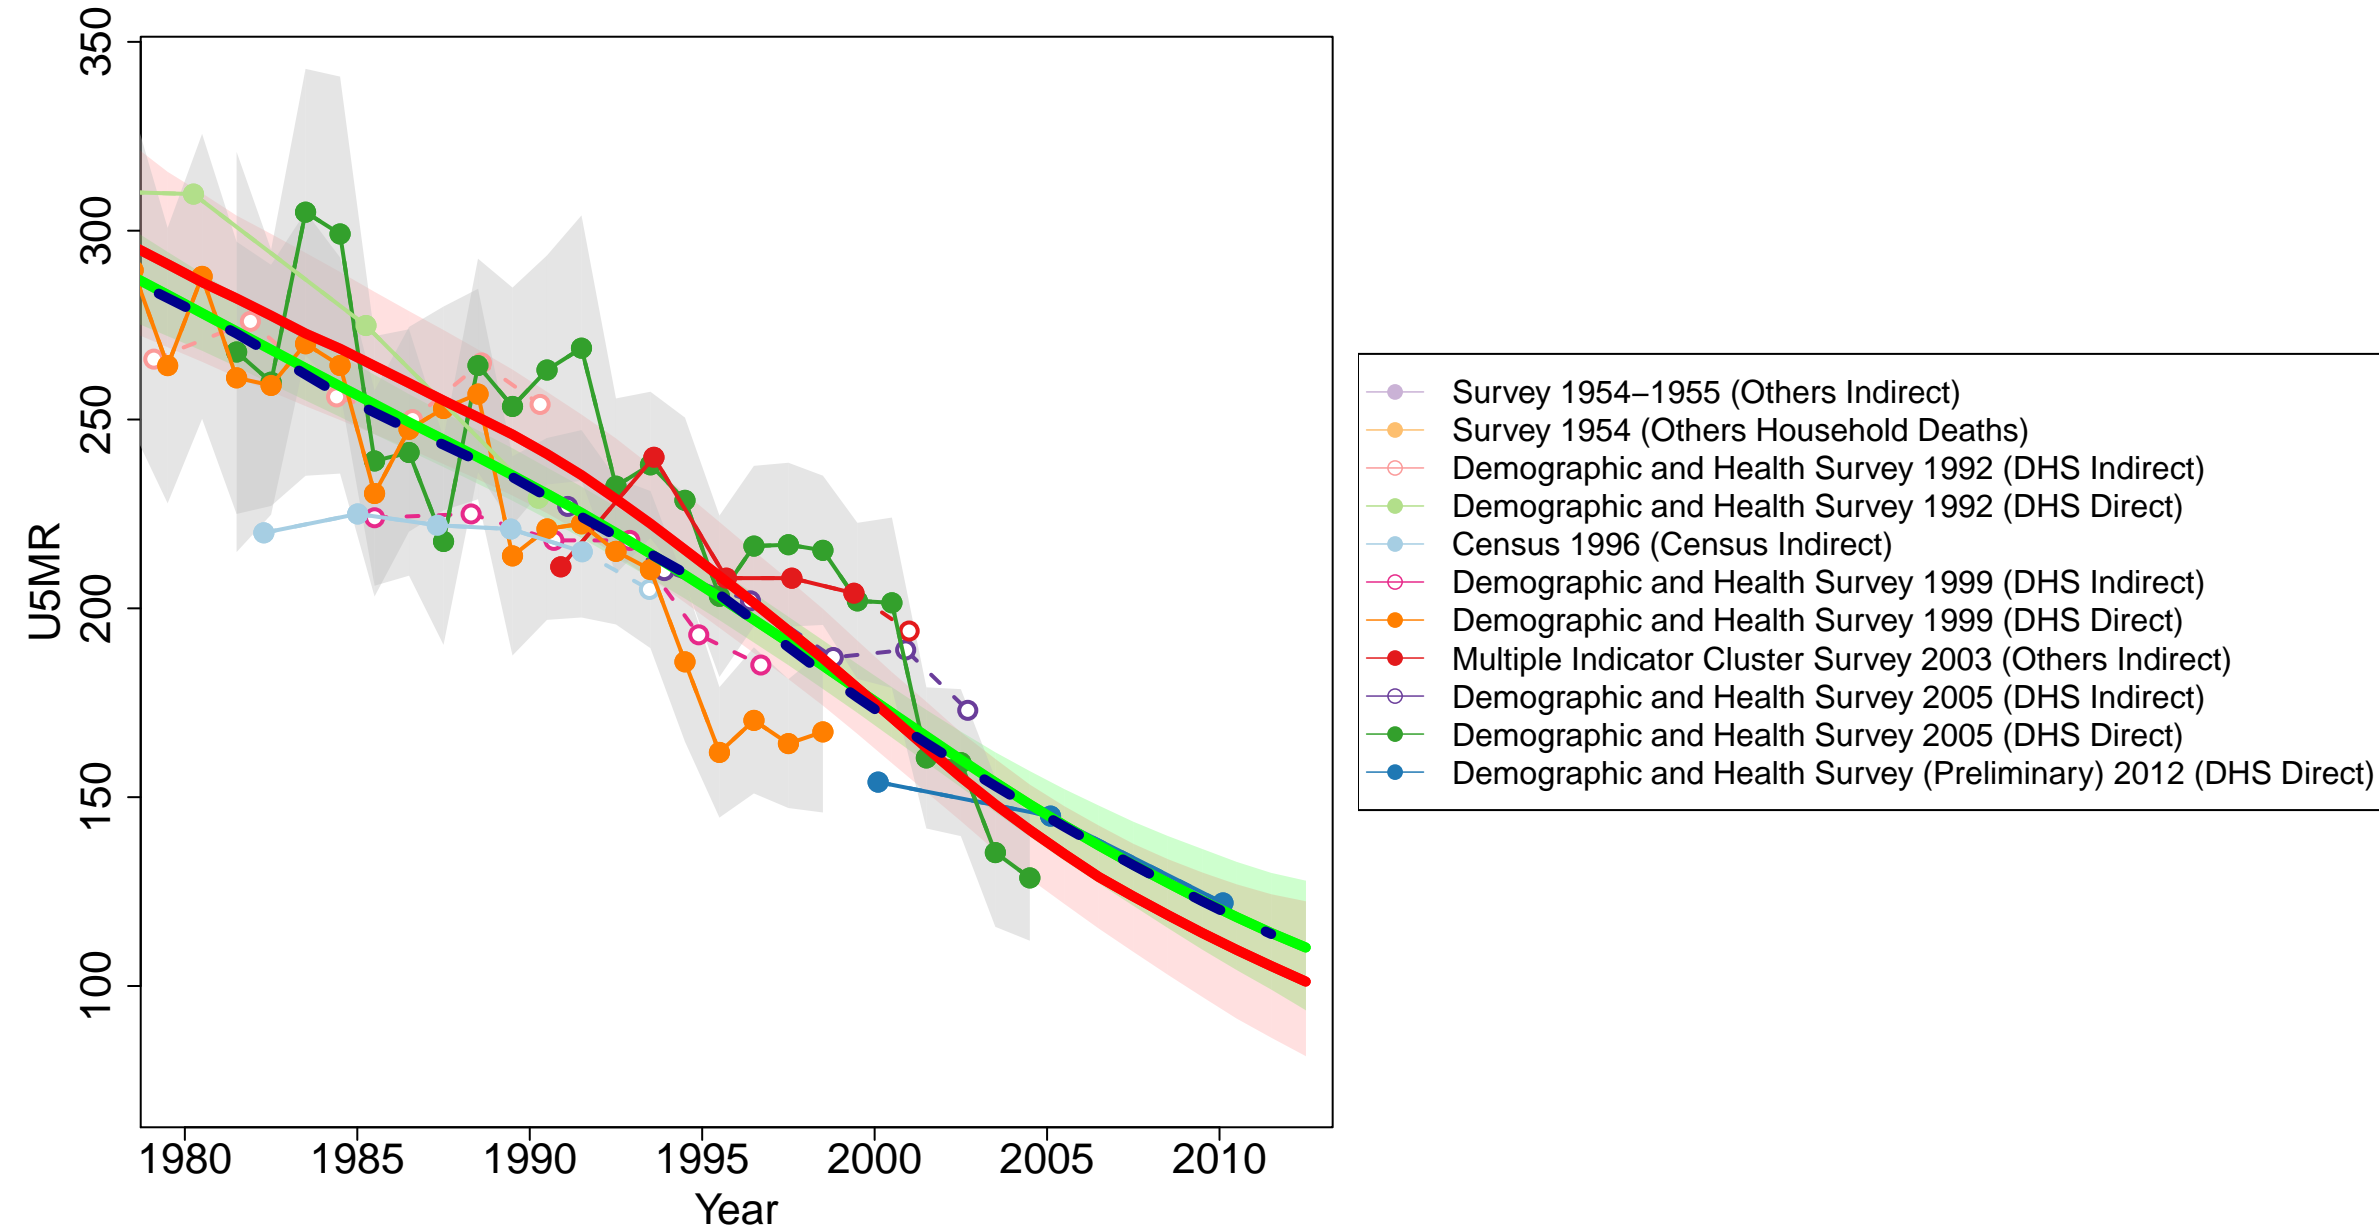

# Guinea-Bissau

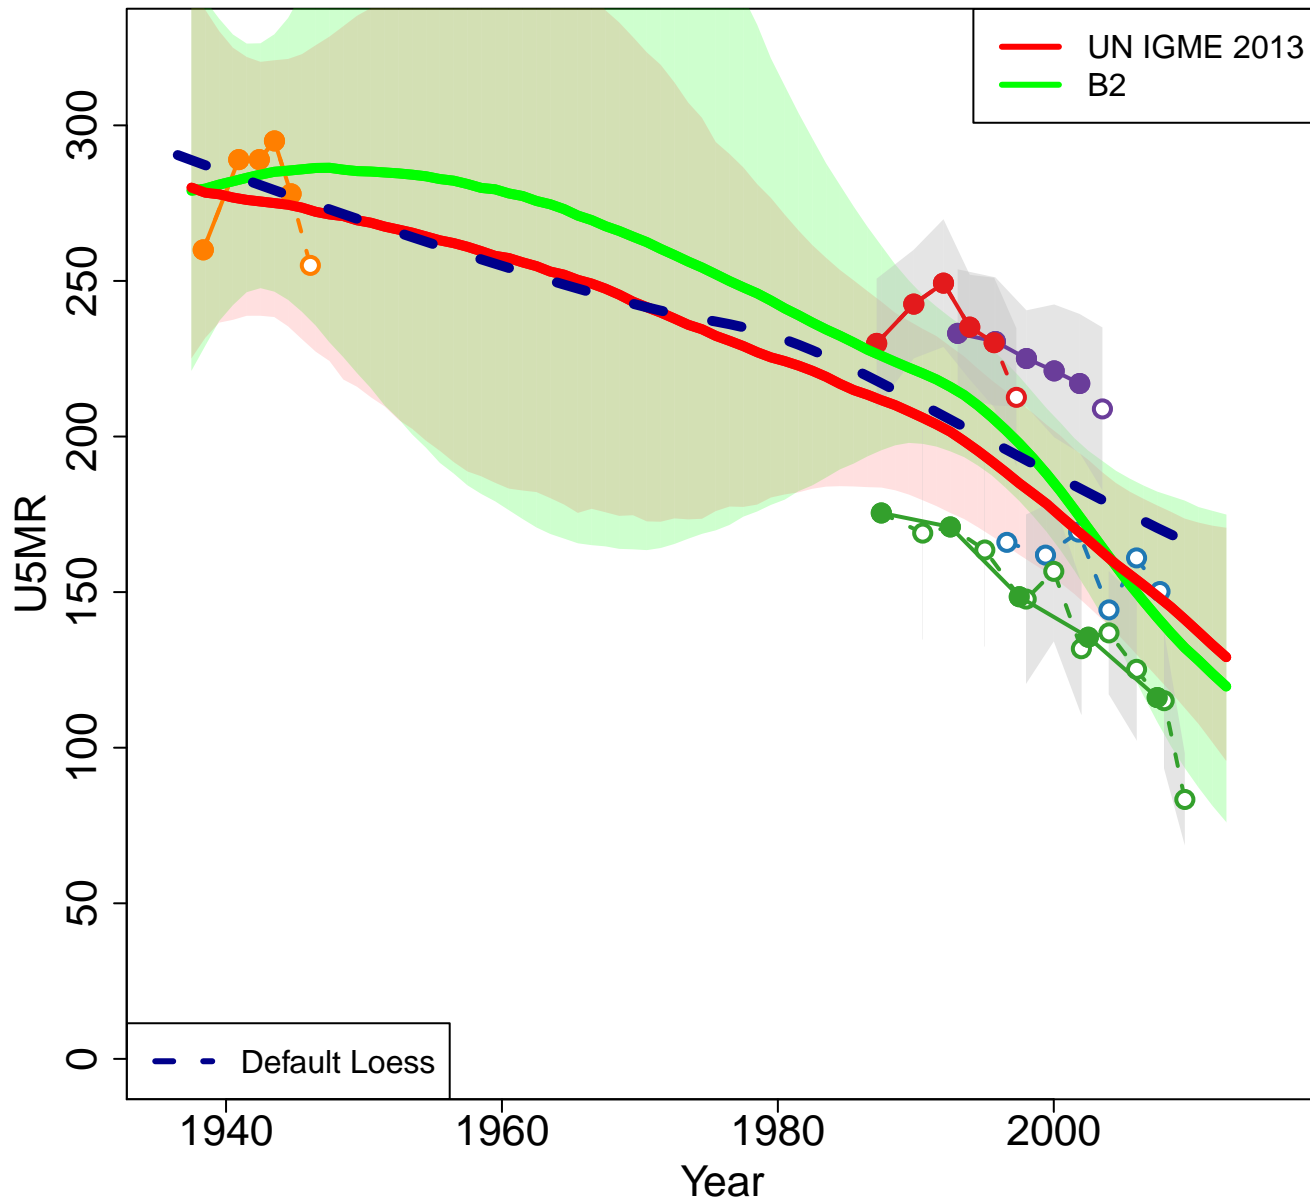

# Zoomed in

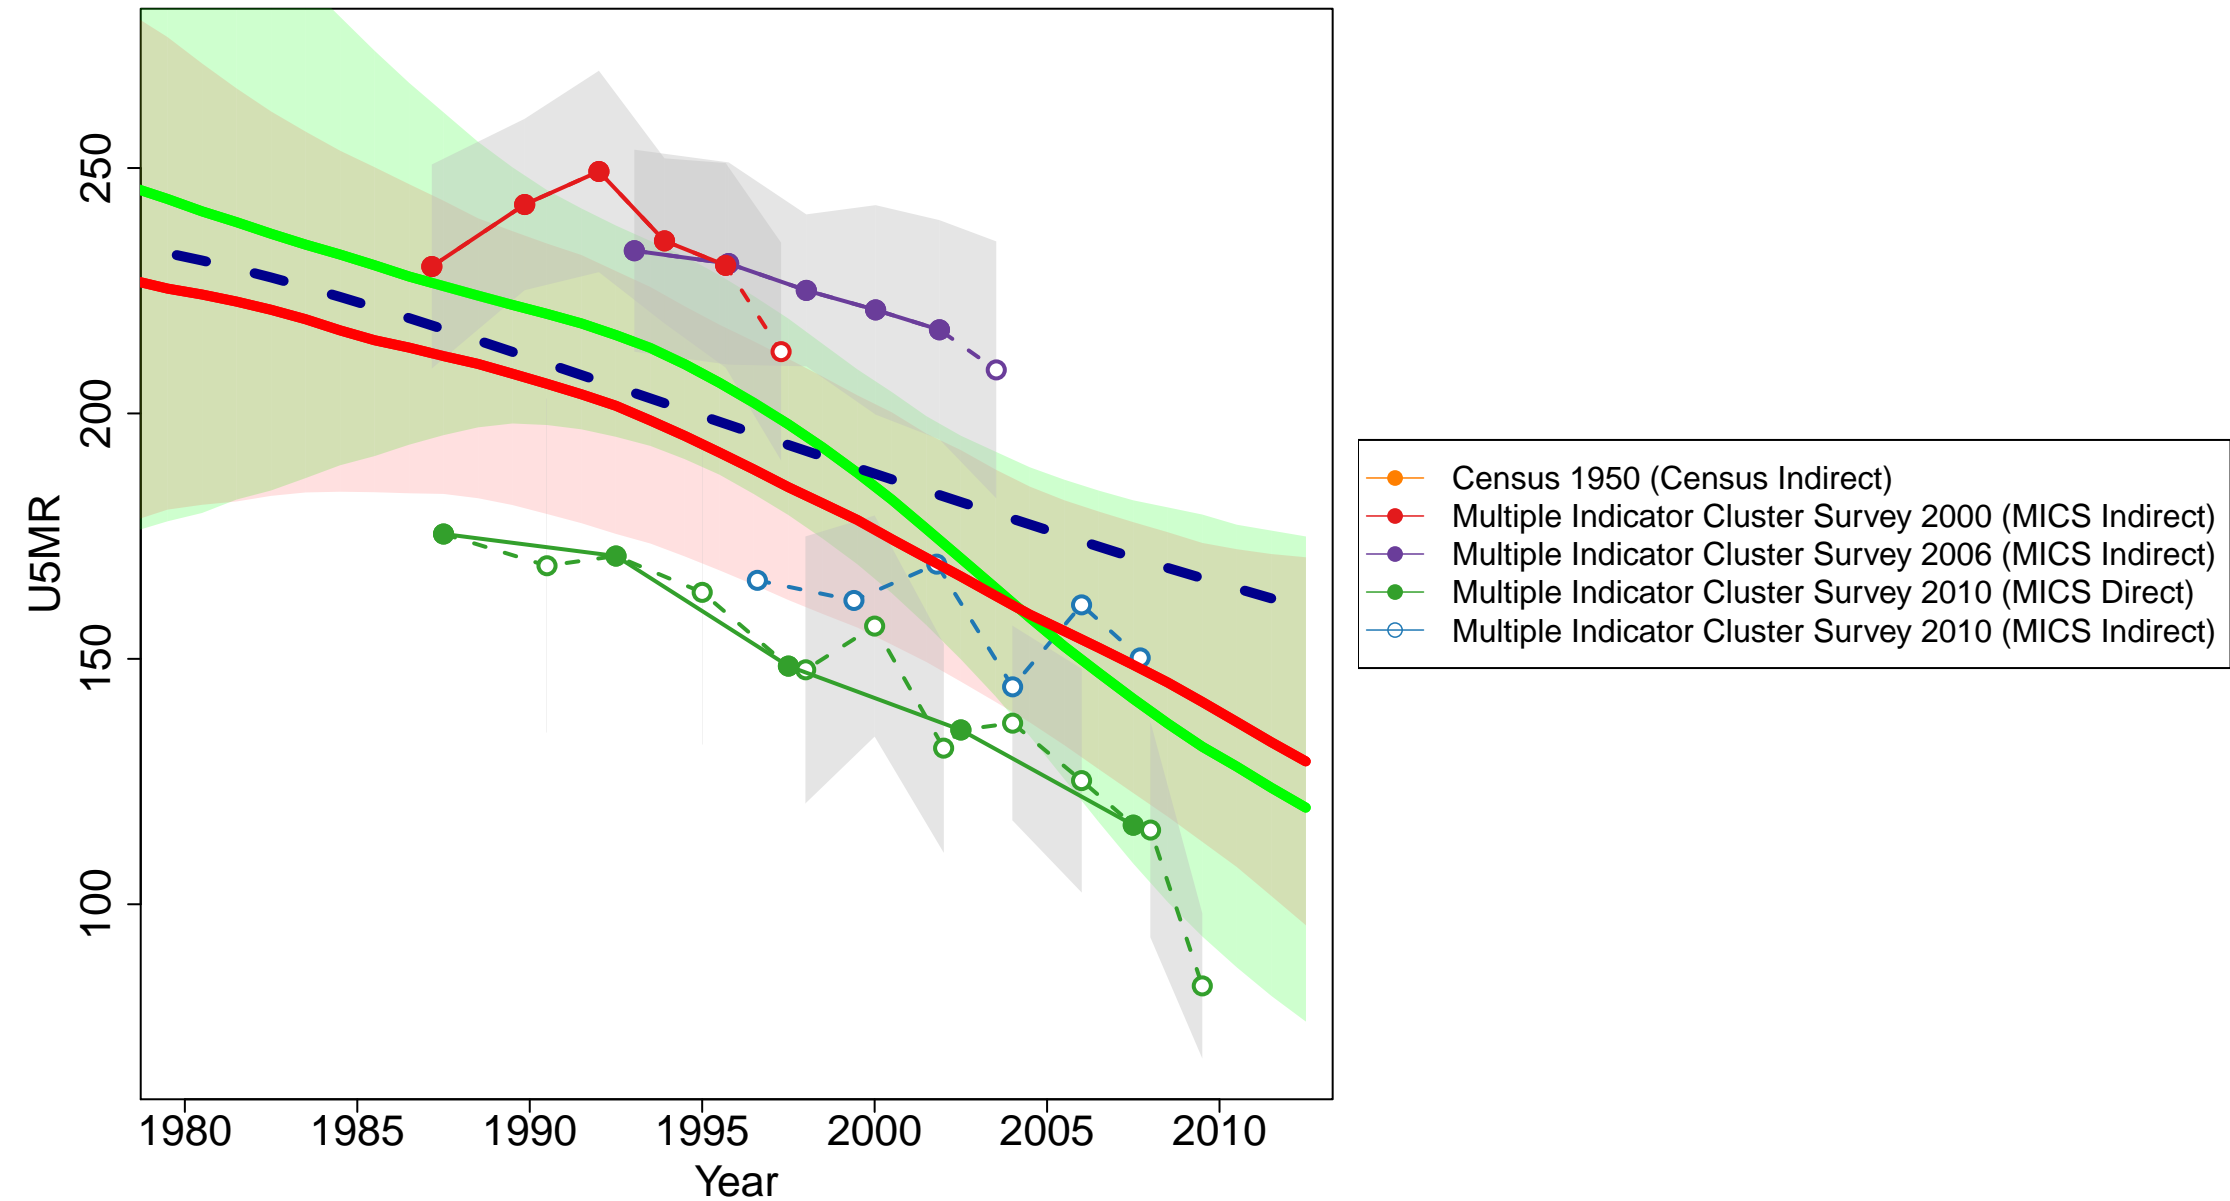

# Lao PDR

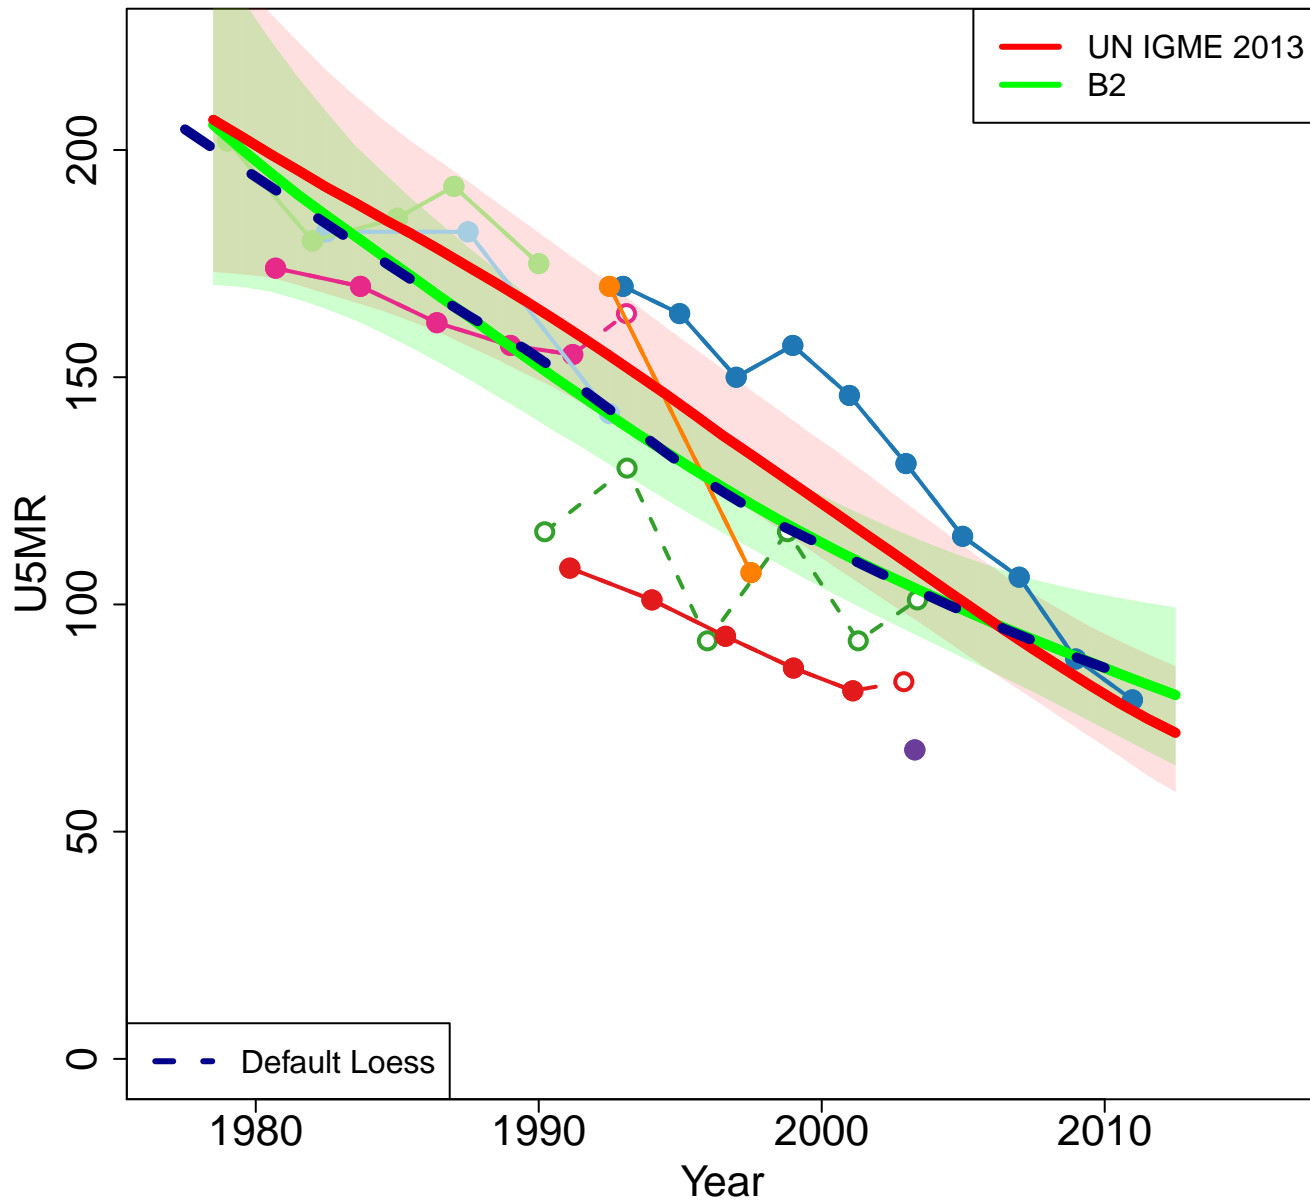

# Zoomed in

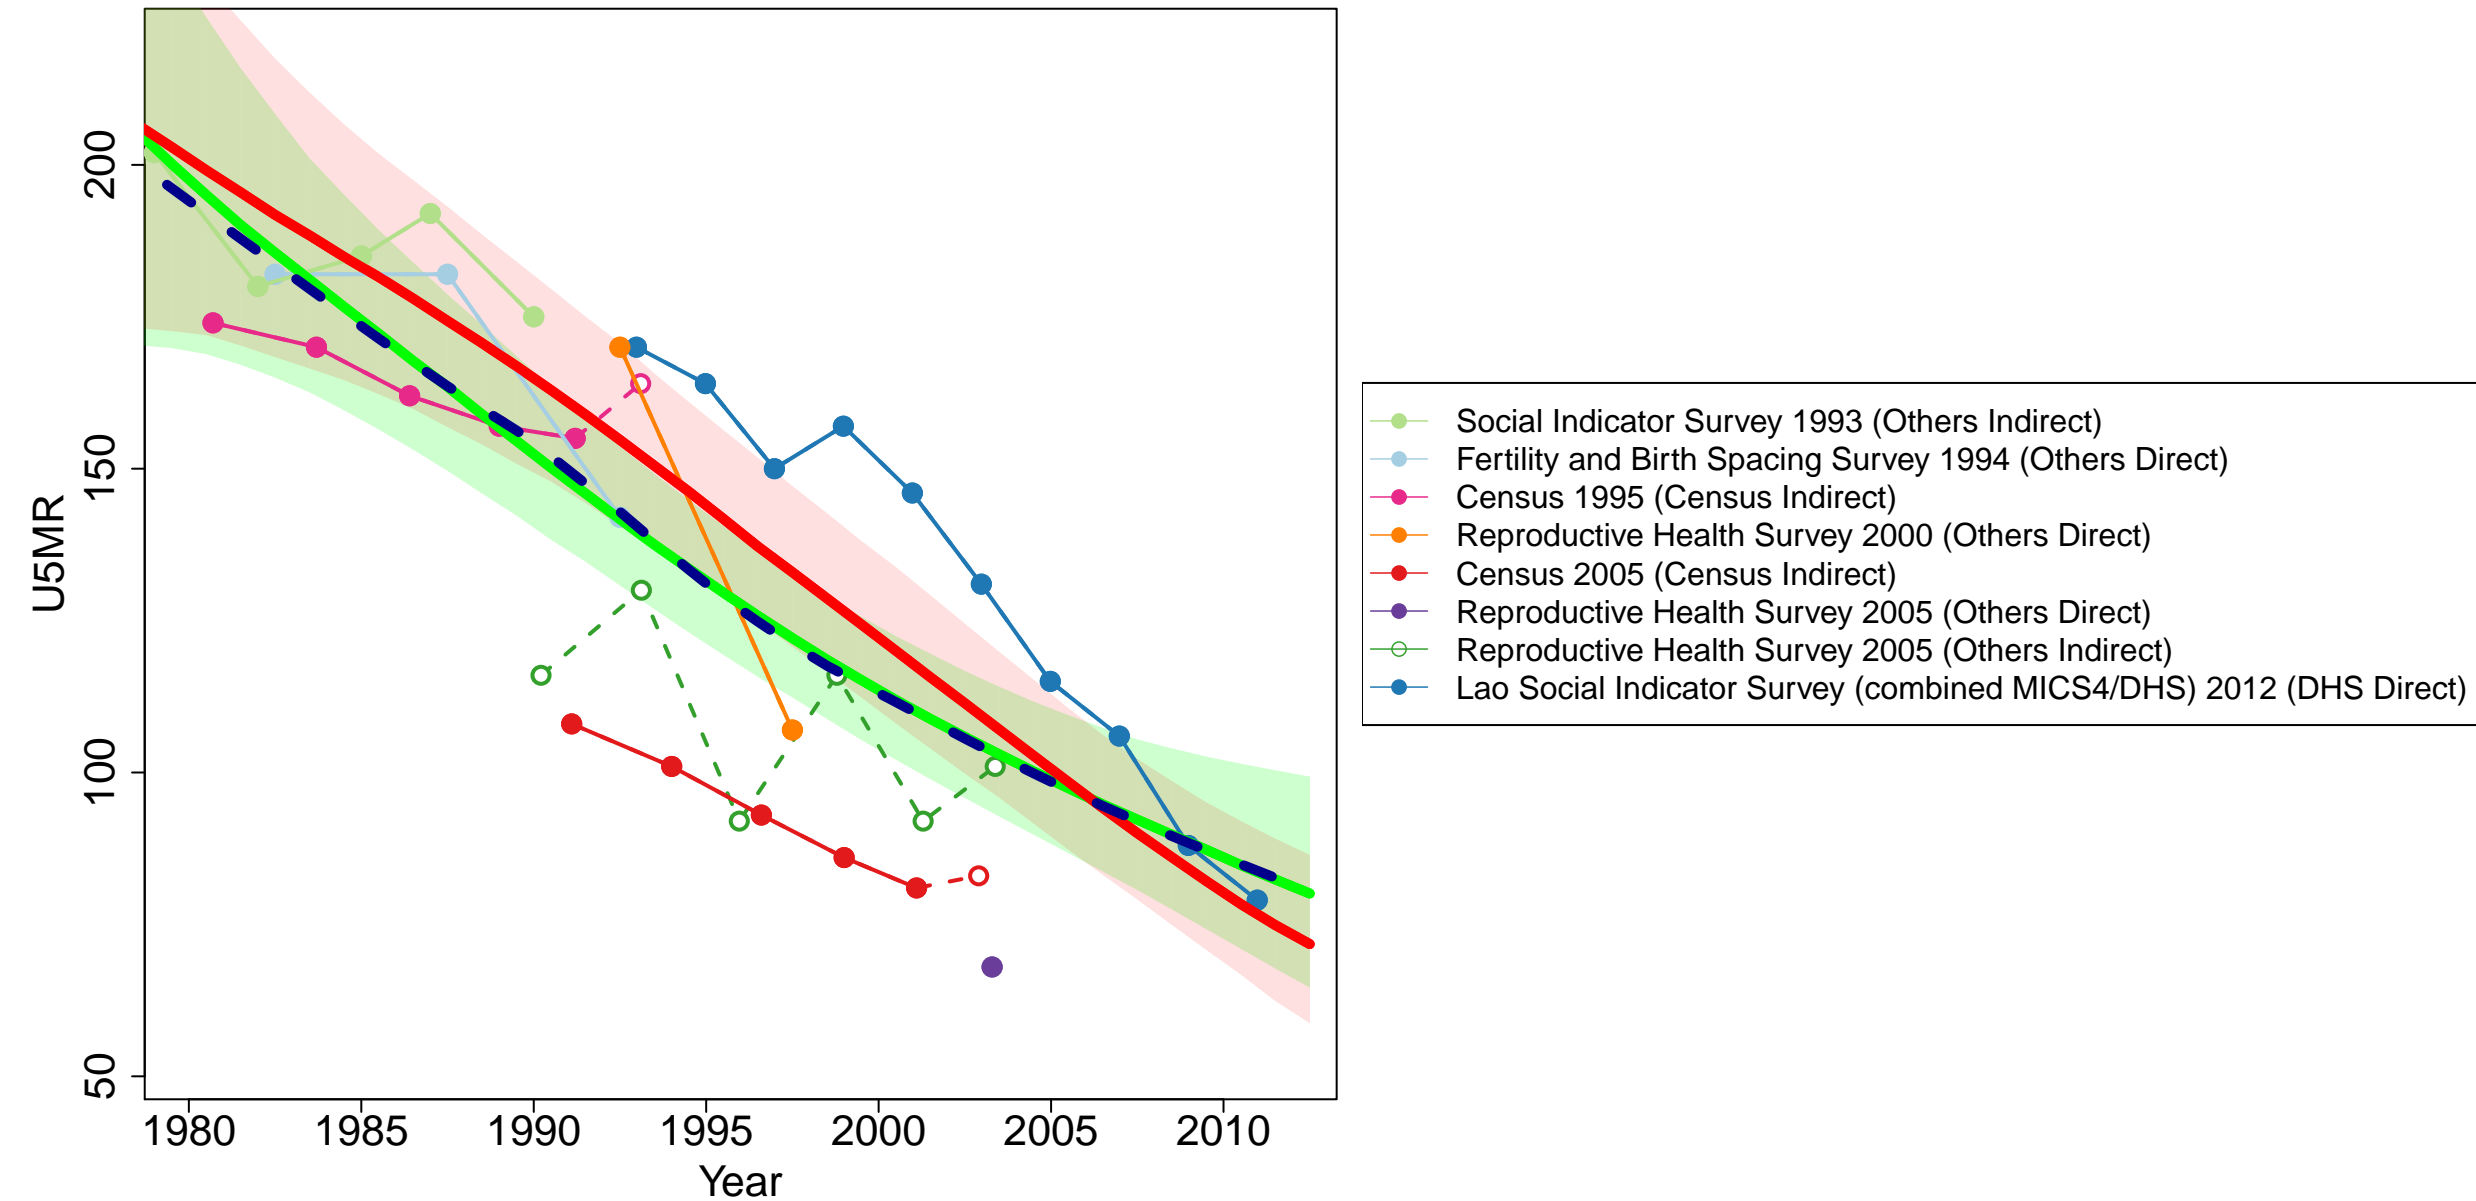

# Maldives

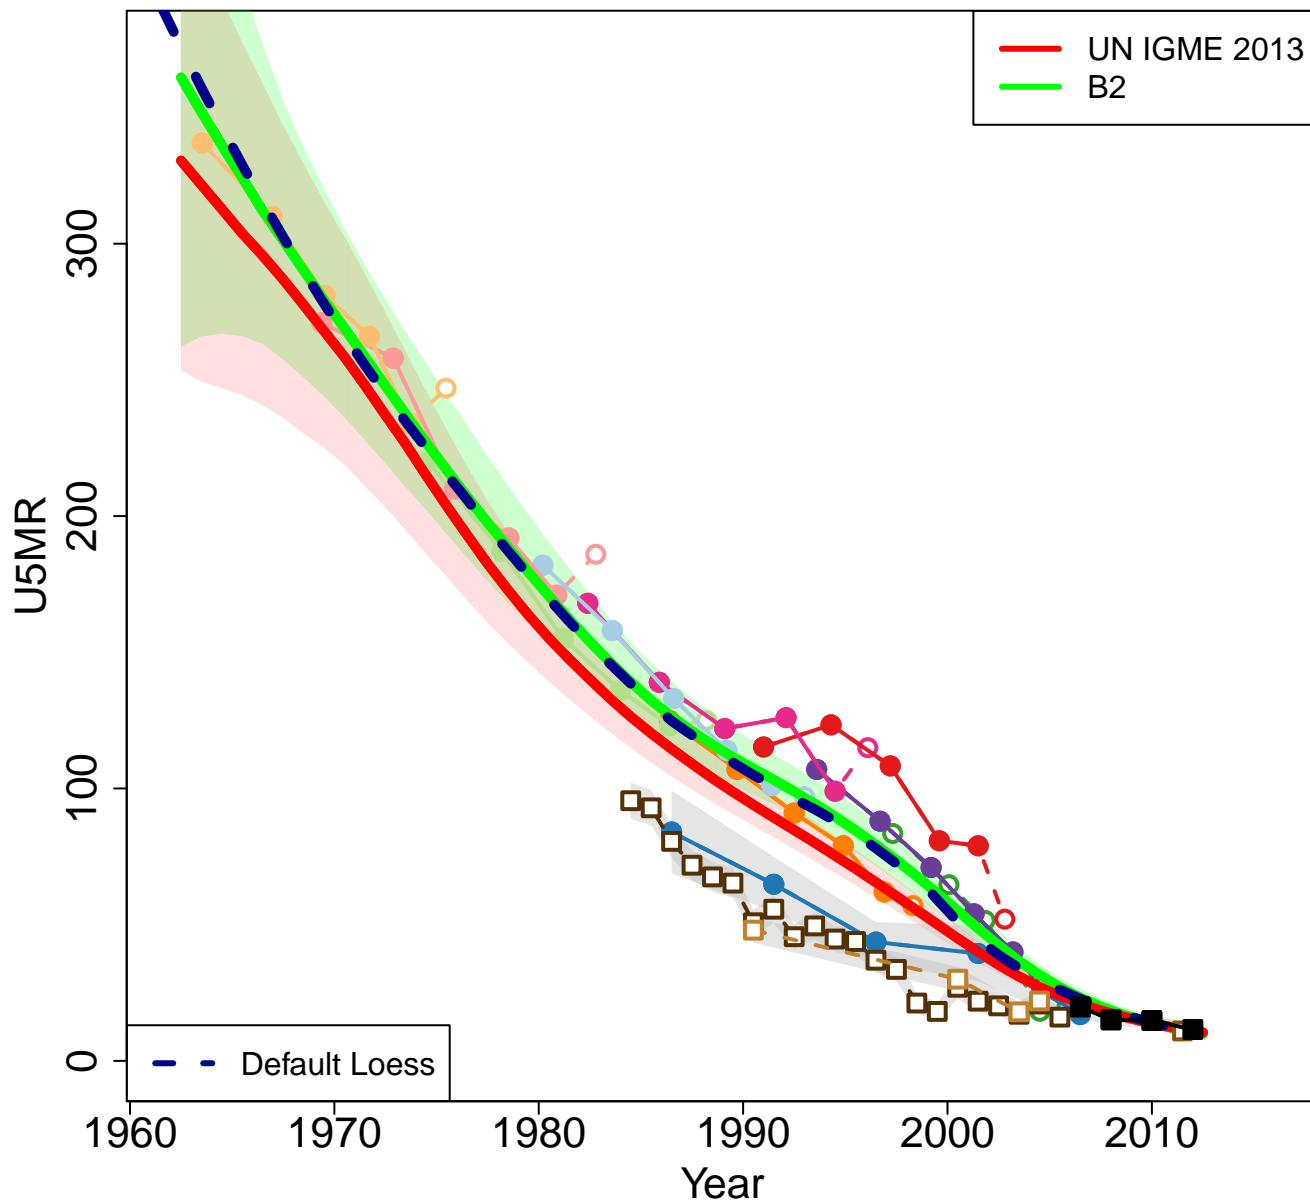

# Zoomed in

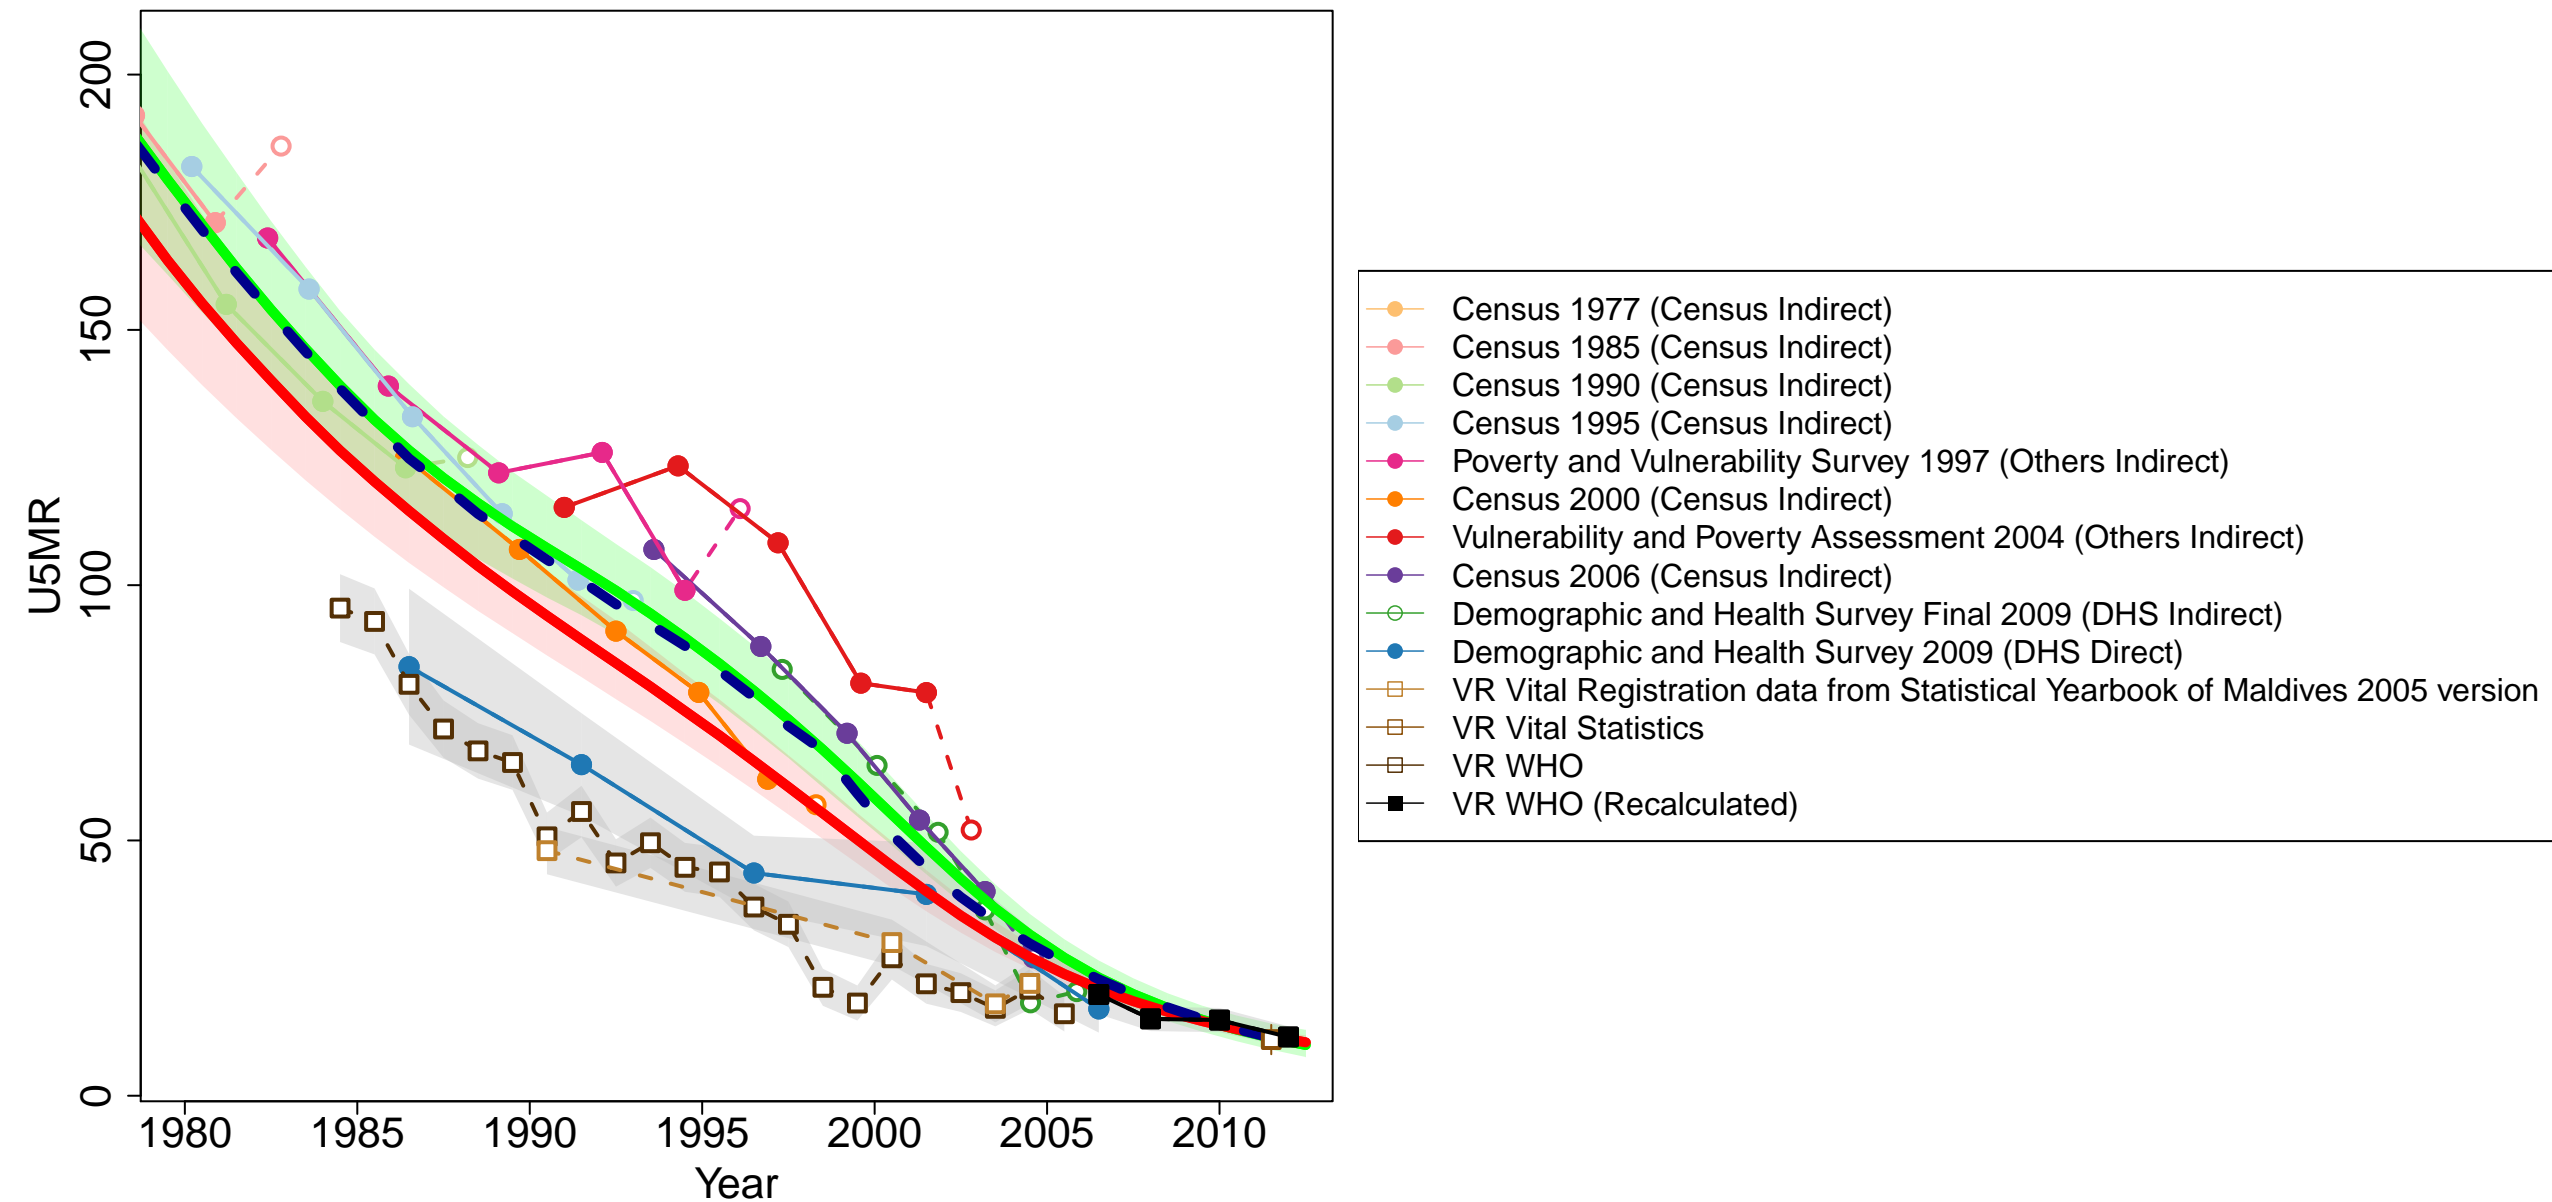

# Mali

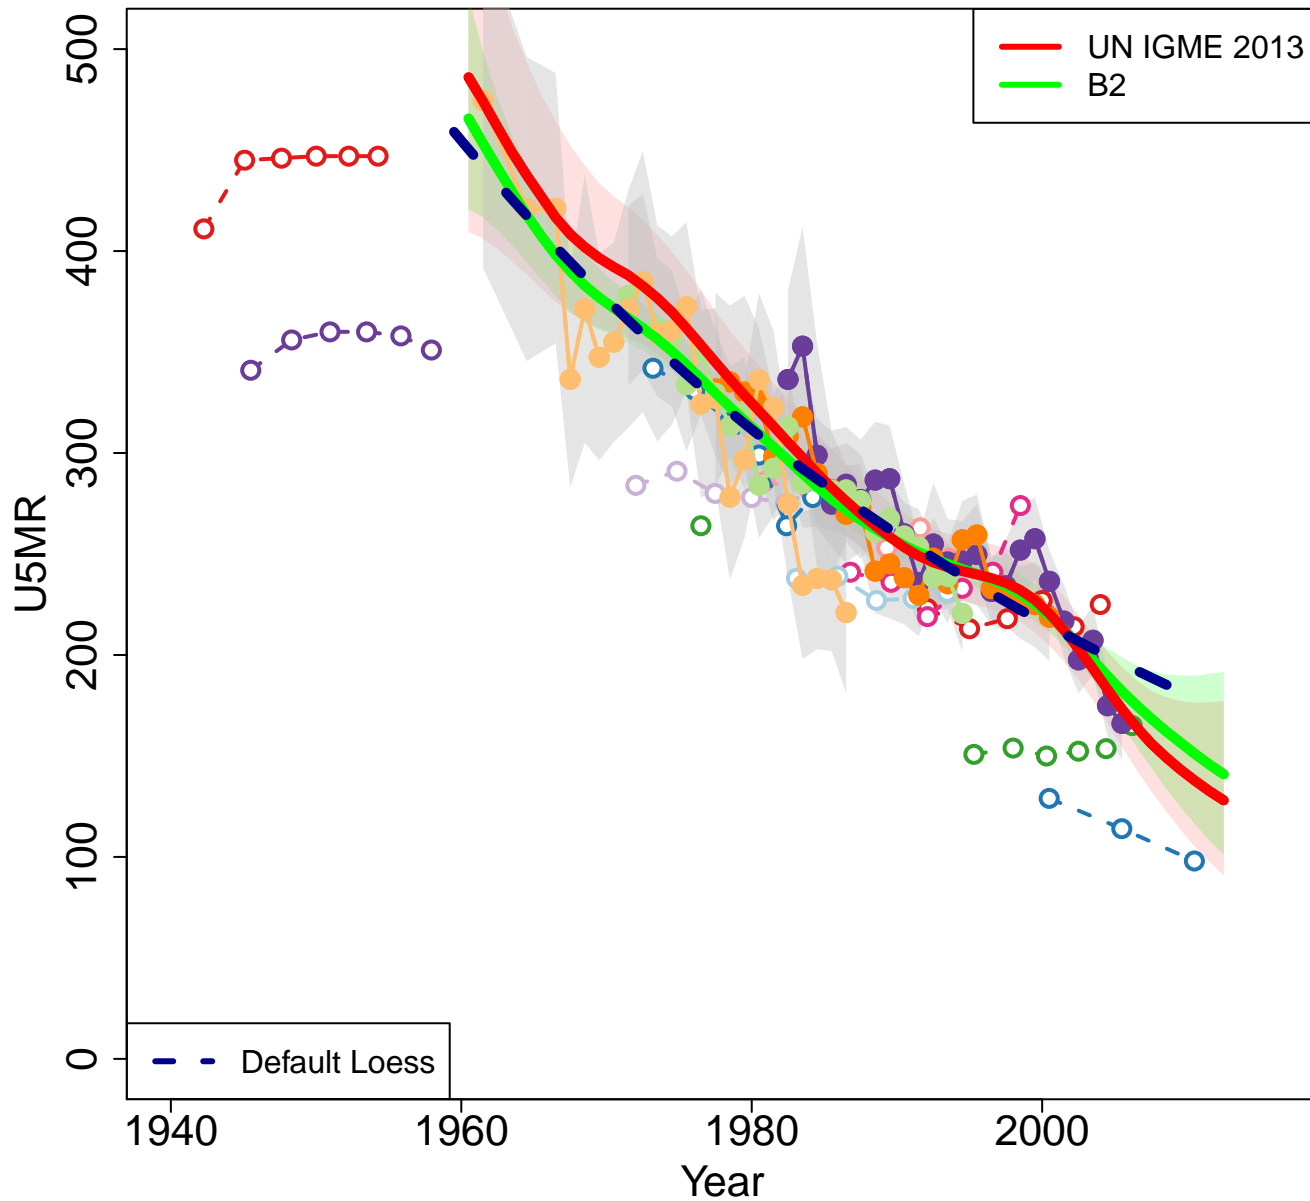

# Zoomed in

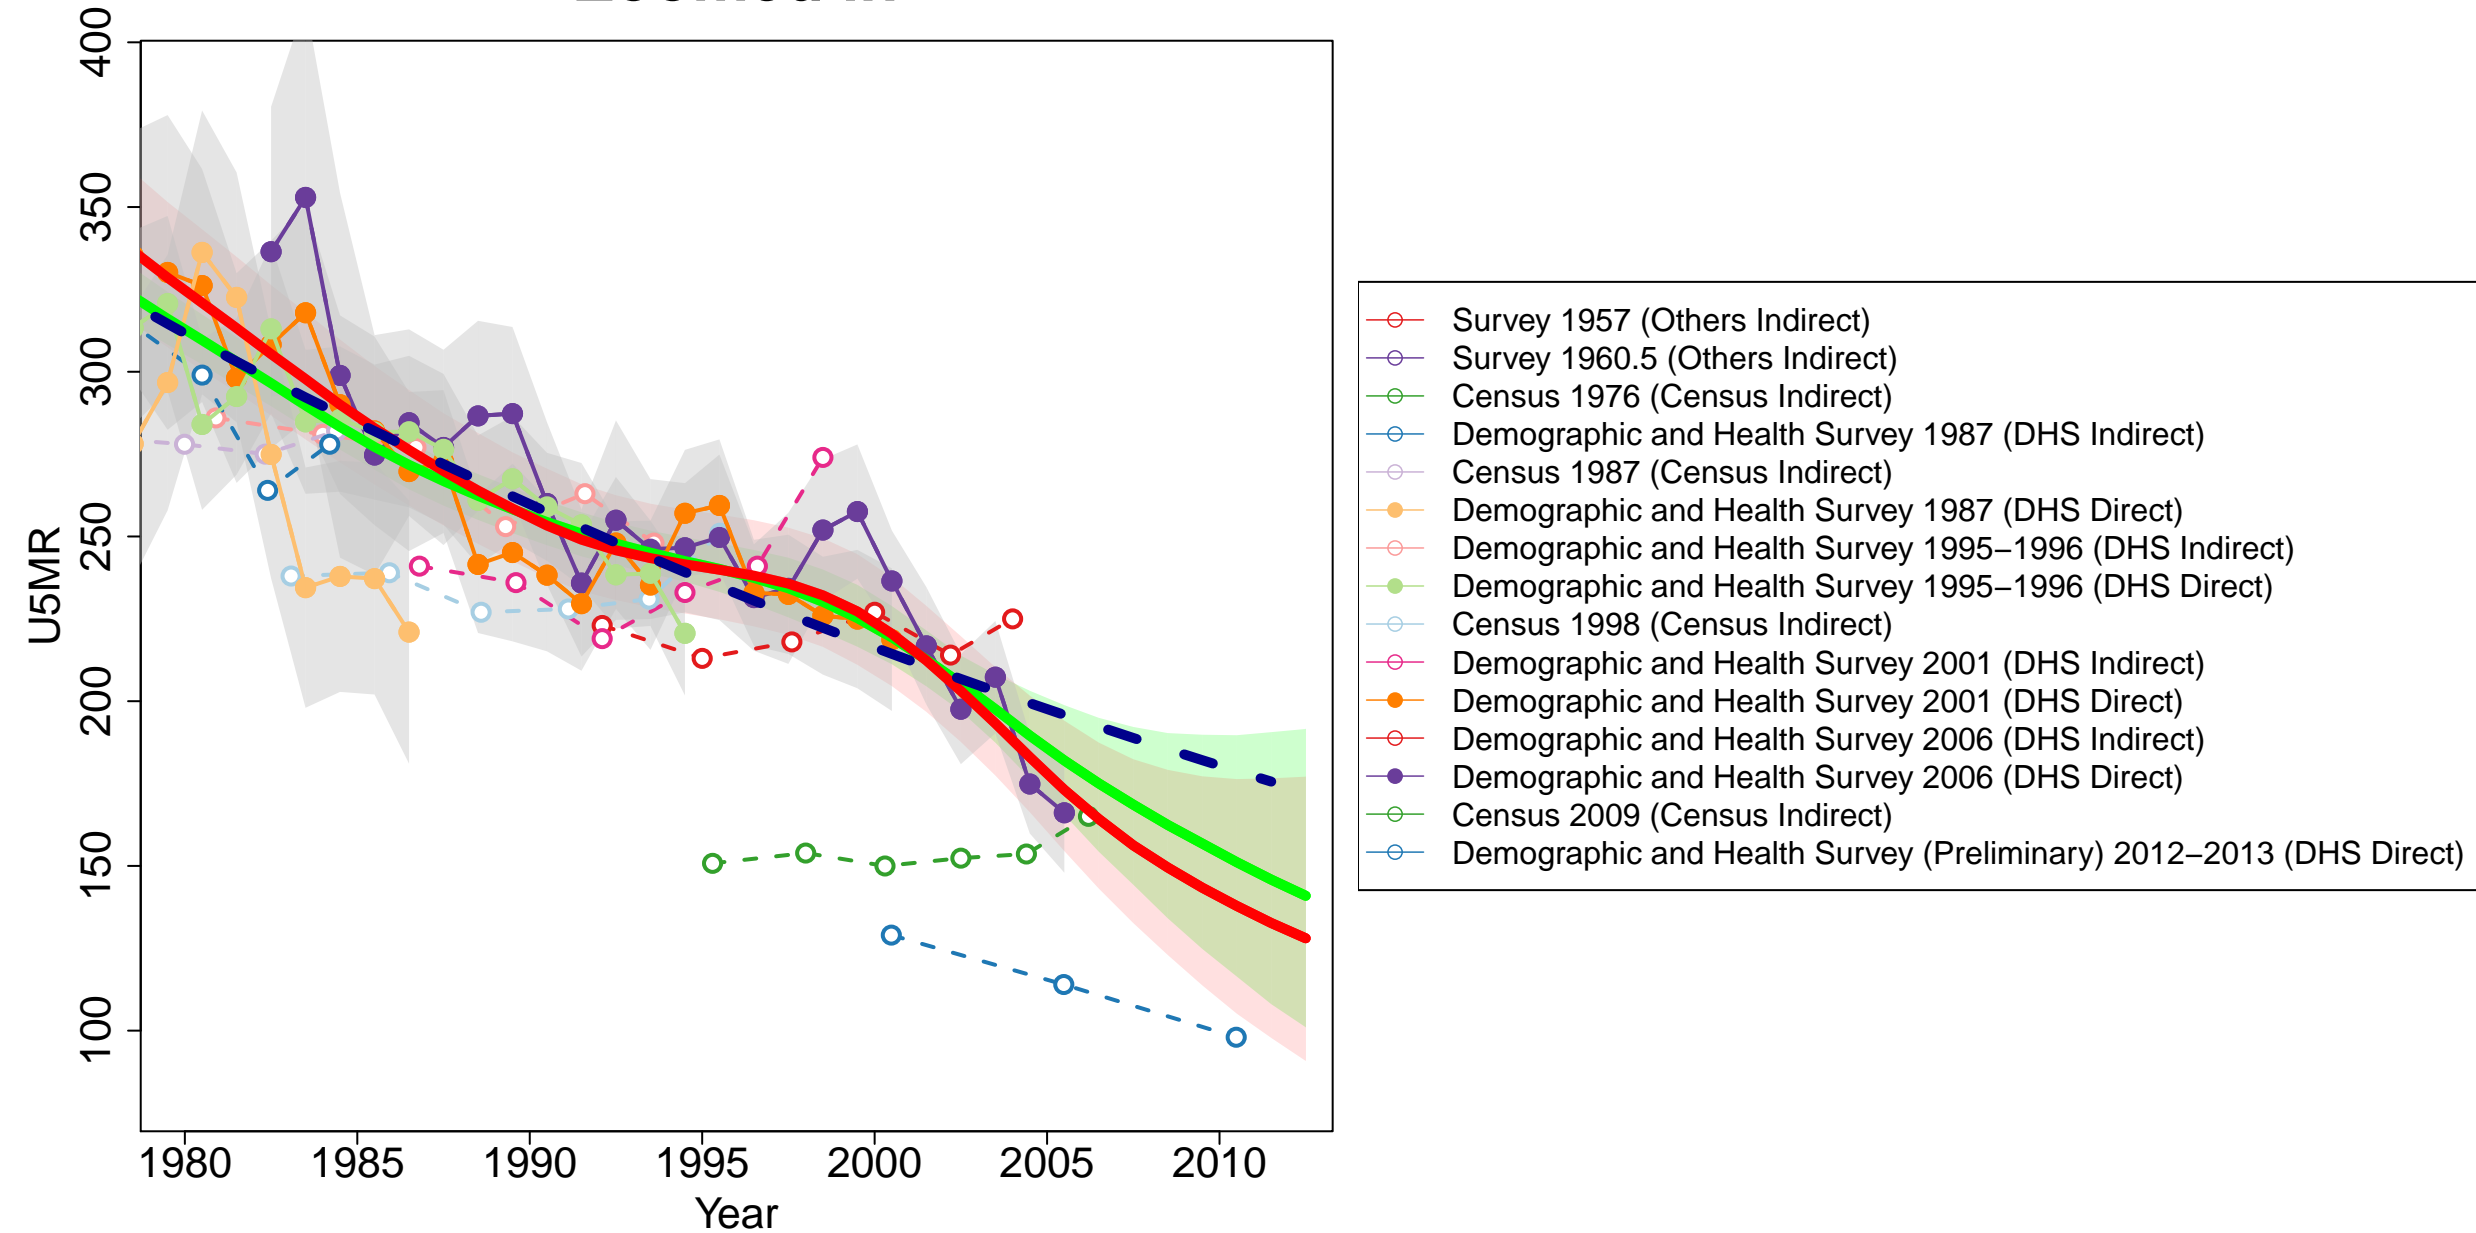



# Mauritania

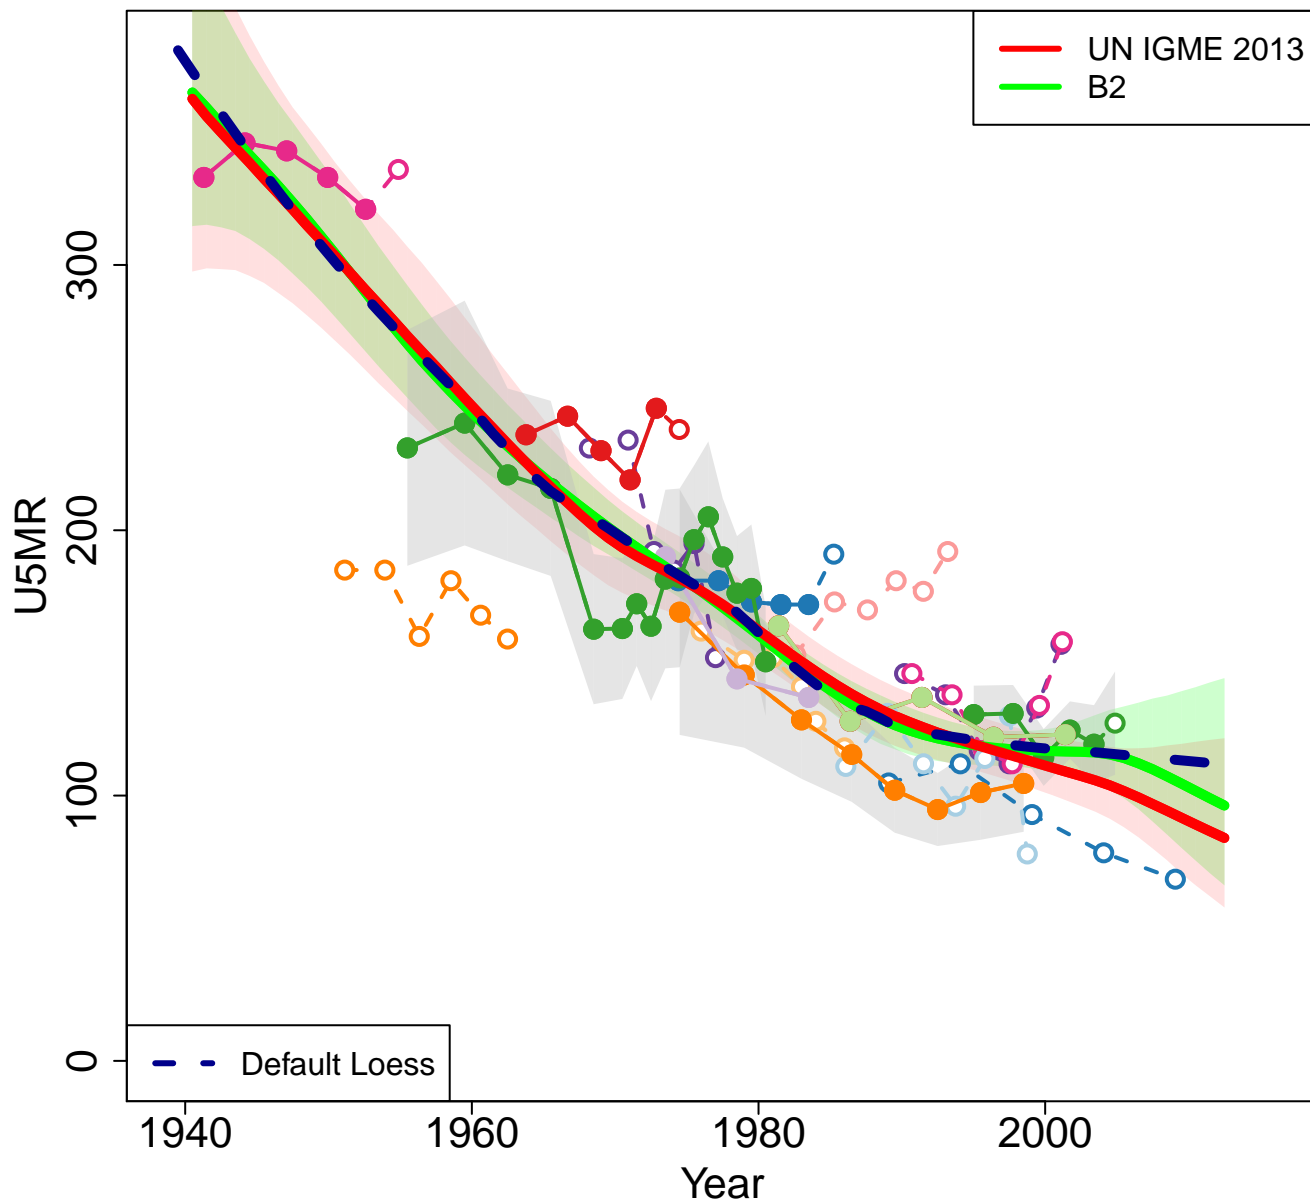

# Zoomed in

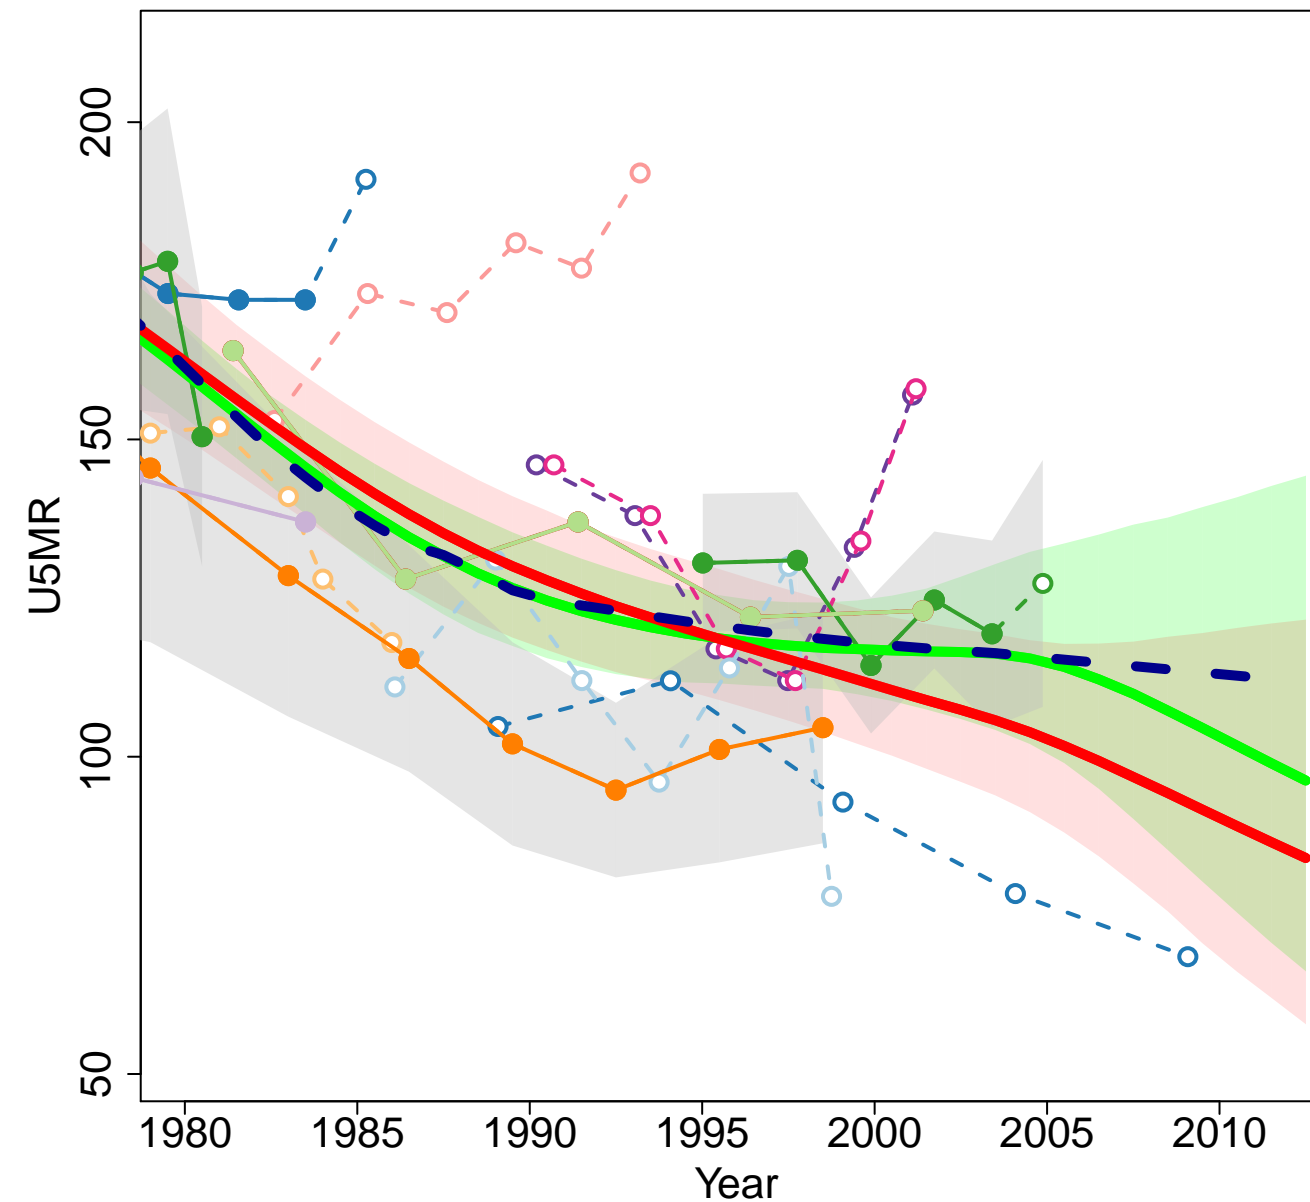

- Fouta-Toro-Survey 1957 (Others Indirect)
- Survey 1964-1965 (Others Indirect)
- Census 1977 (Census Indirect)
- World Fertility Survey 1981-1982 (Other DHS Indirect)
- World Fertility Survey 1981-1982 (Other DHS Direct)
- Census 1988 (Census Indirect)
- MCHS 1990 (Others Direct)
- MCHS 1990 (Others Indirect)
- Multiple Indicator Cluster Survey 1995 (MICS Indirect)
- EMIP 2000 (Others Direct)
- Demographic and Health Survey 2000-2001 (DHS Indirect)
- EMIP 2000 (Others Indirect)
- Demographic and Health Survey 2000-2001 (DHS Direct)
- EMIP survey 2003-2004 (Others Direct)
- EMIP survey 2003-2004 (Others Indirect)
- Multiple Indicator Cluster Survey 2007 (MICS Indirect)
- Multiple Indicator Cluster Survey 2011 (MICS Direct)

# Myanmar

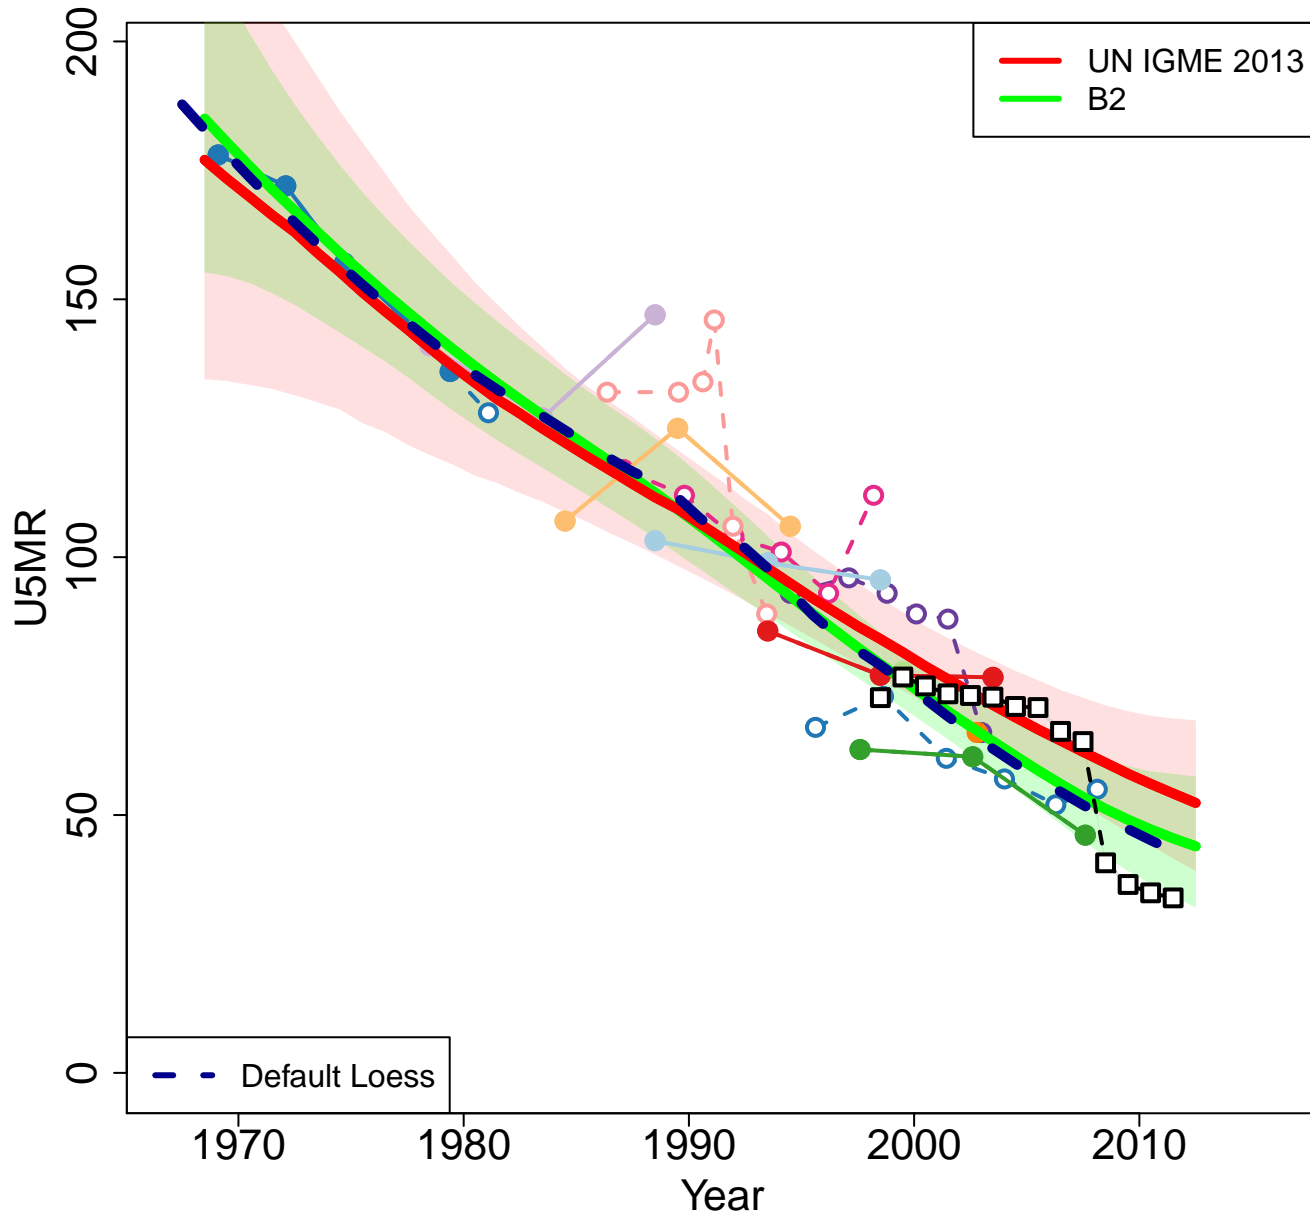

# Zoomed in

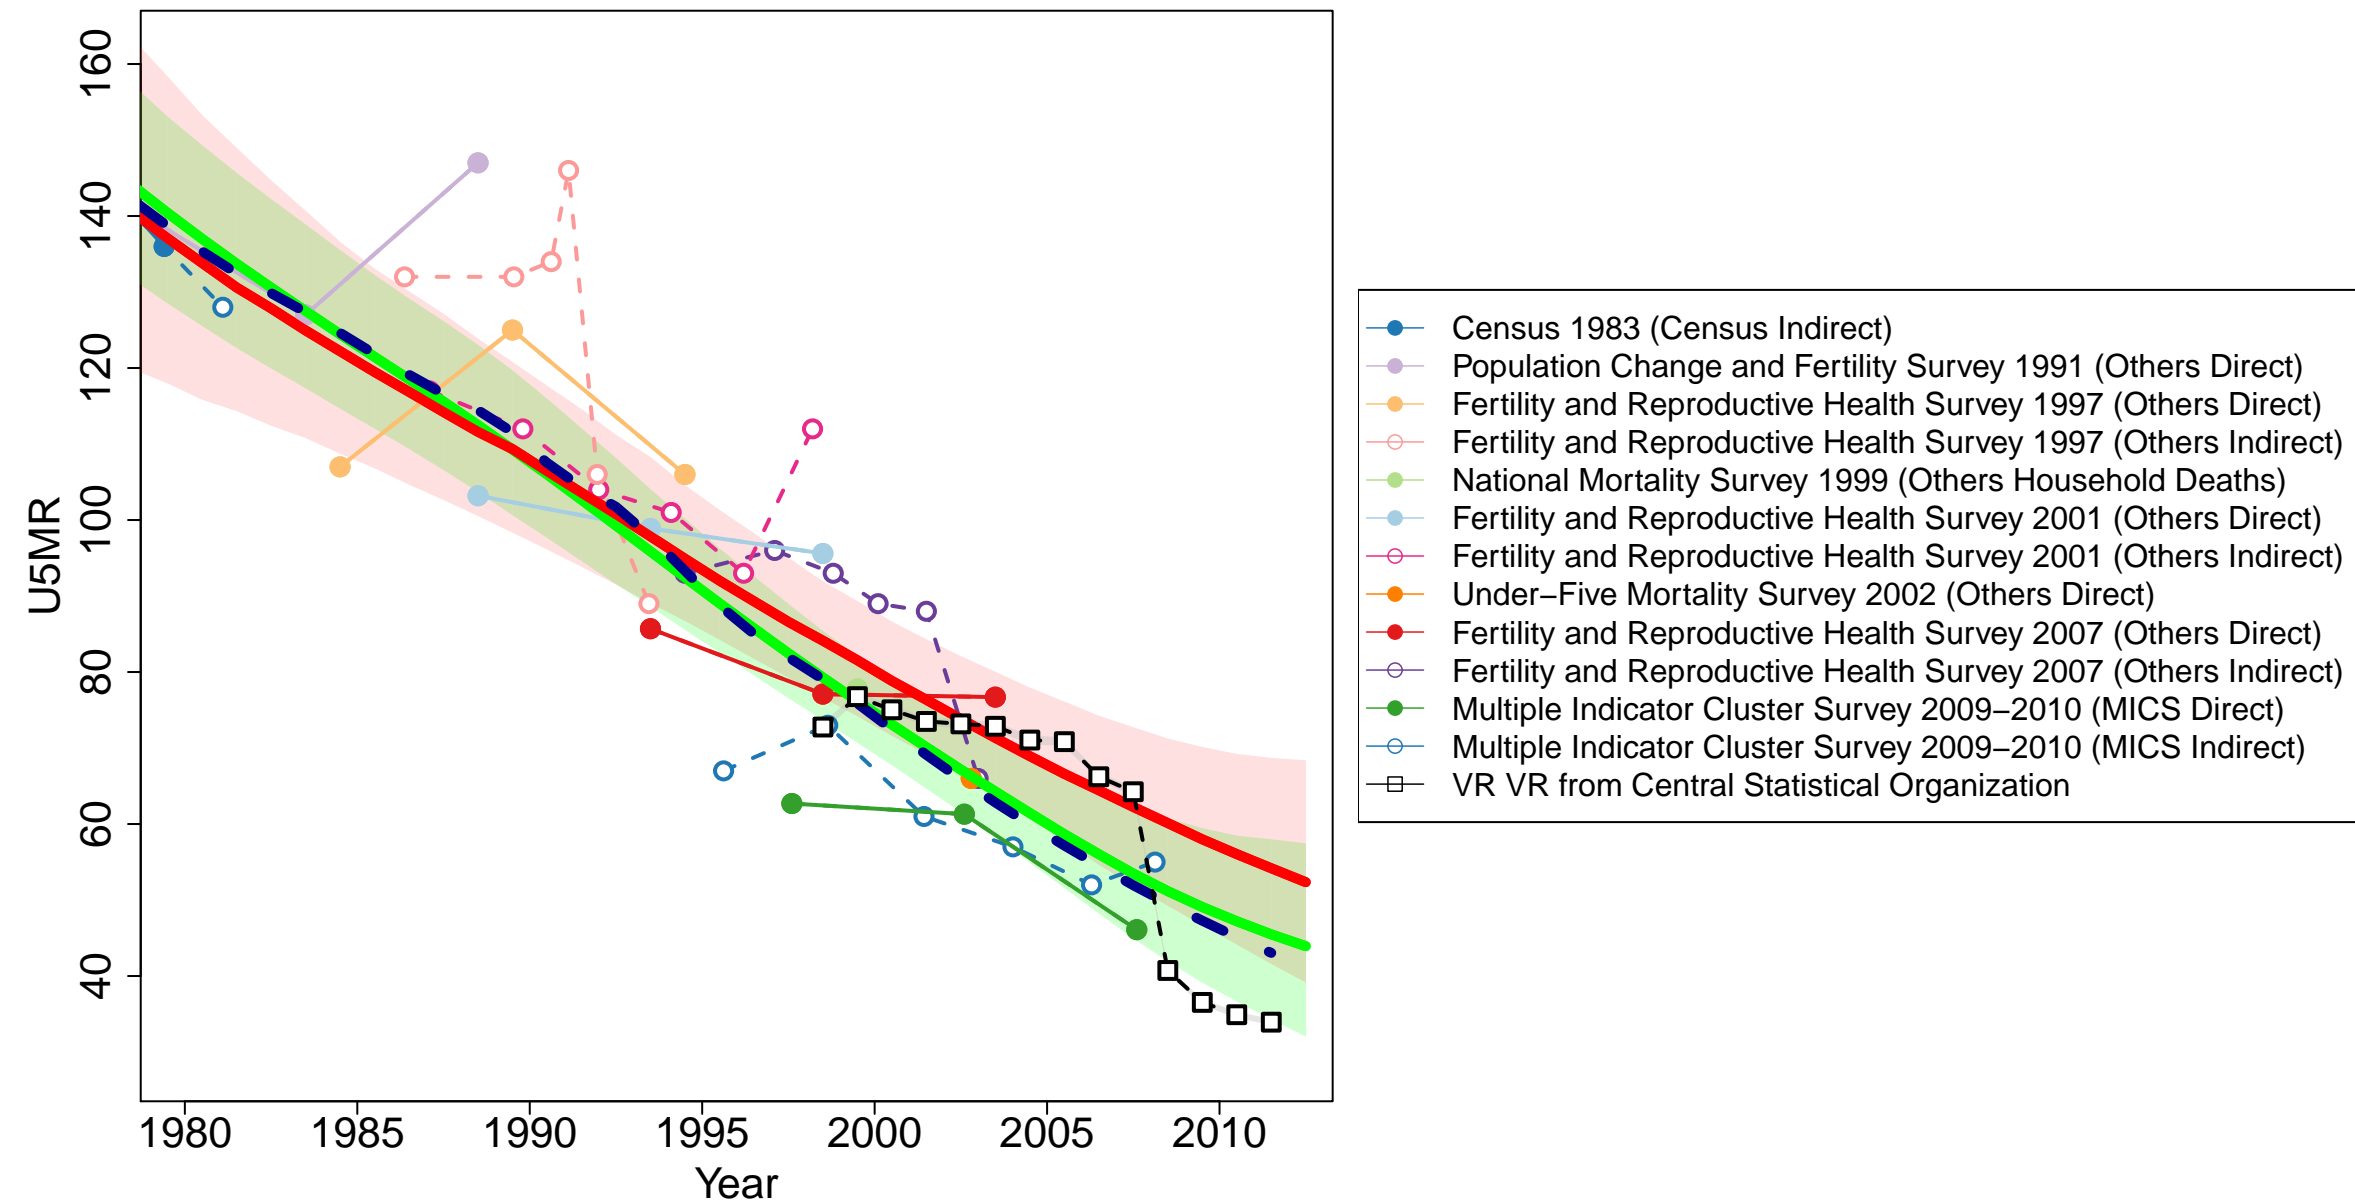

# Niue

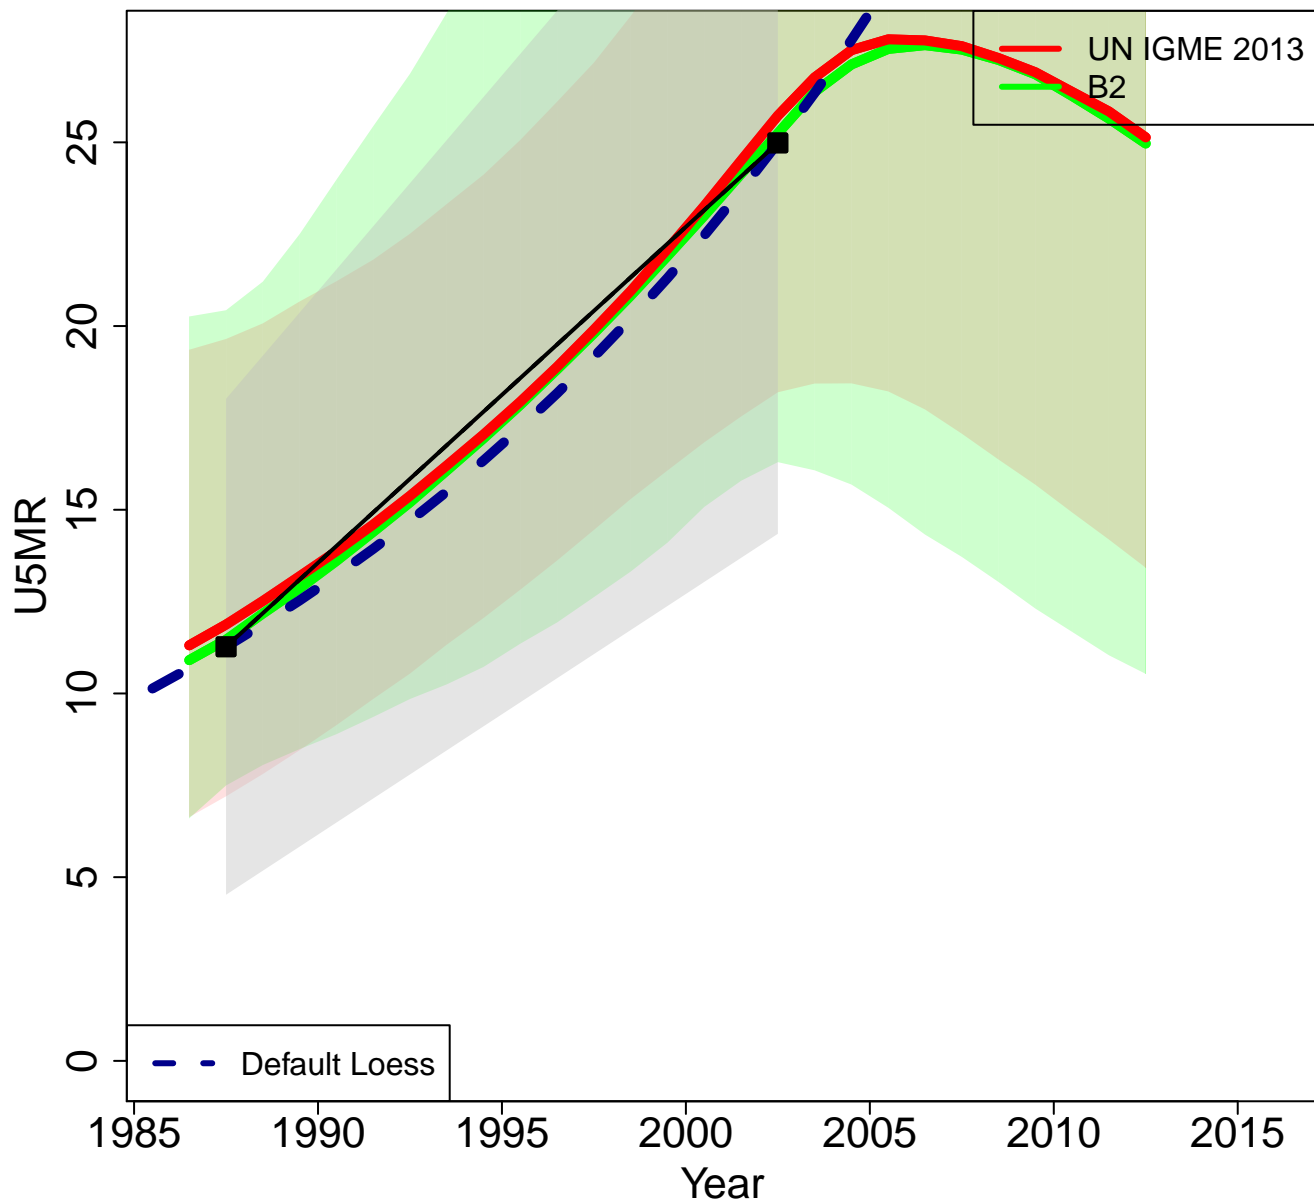

# Zoomed in

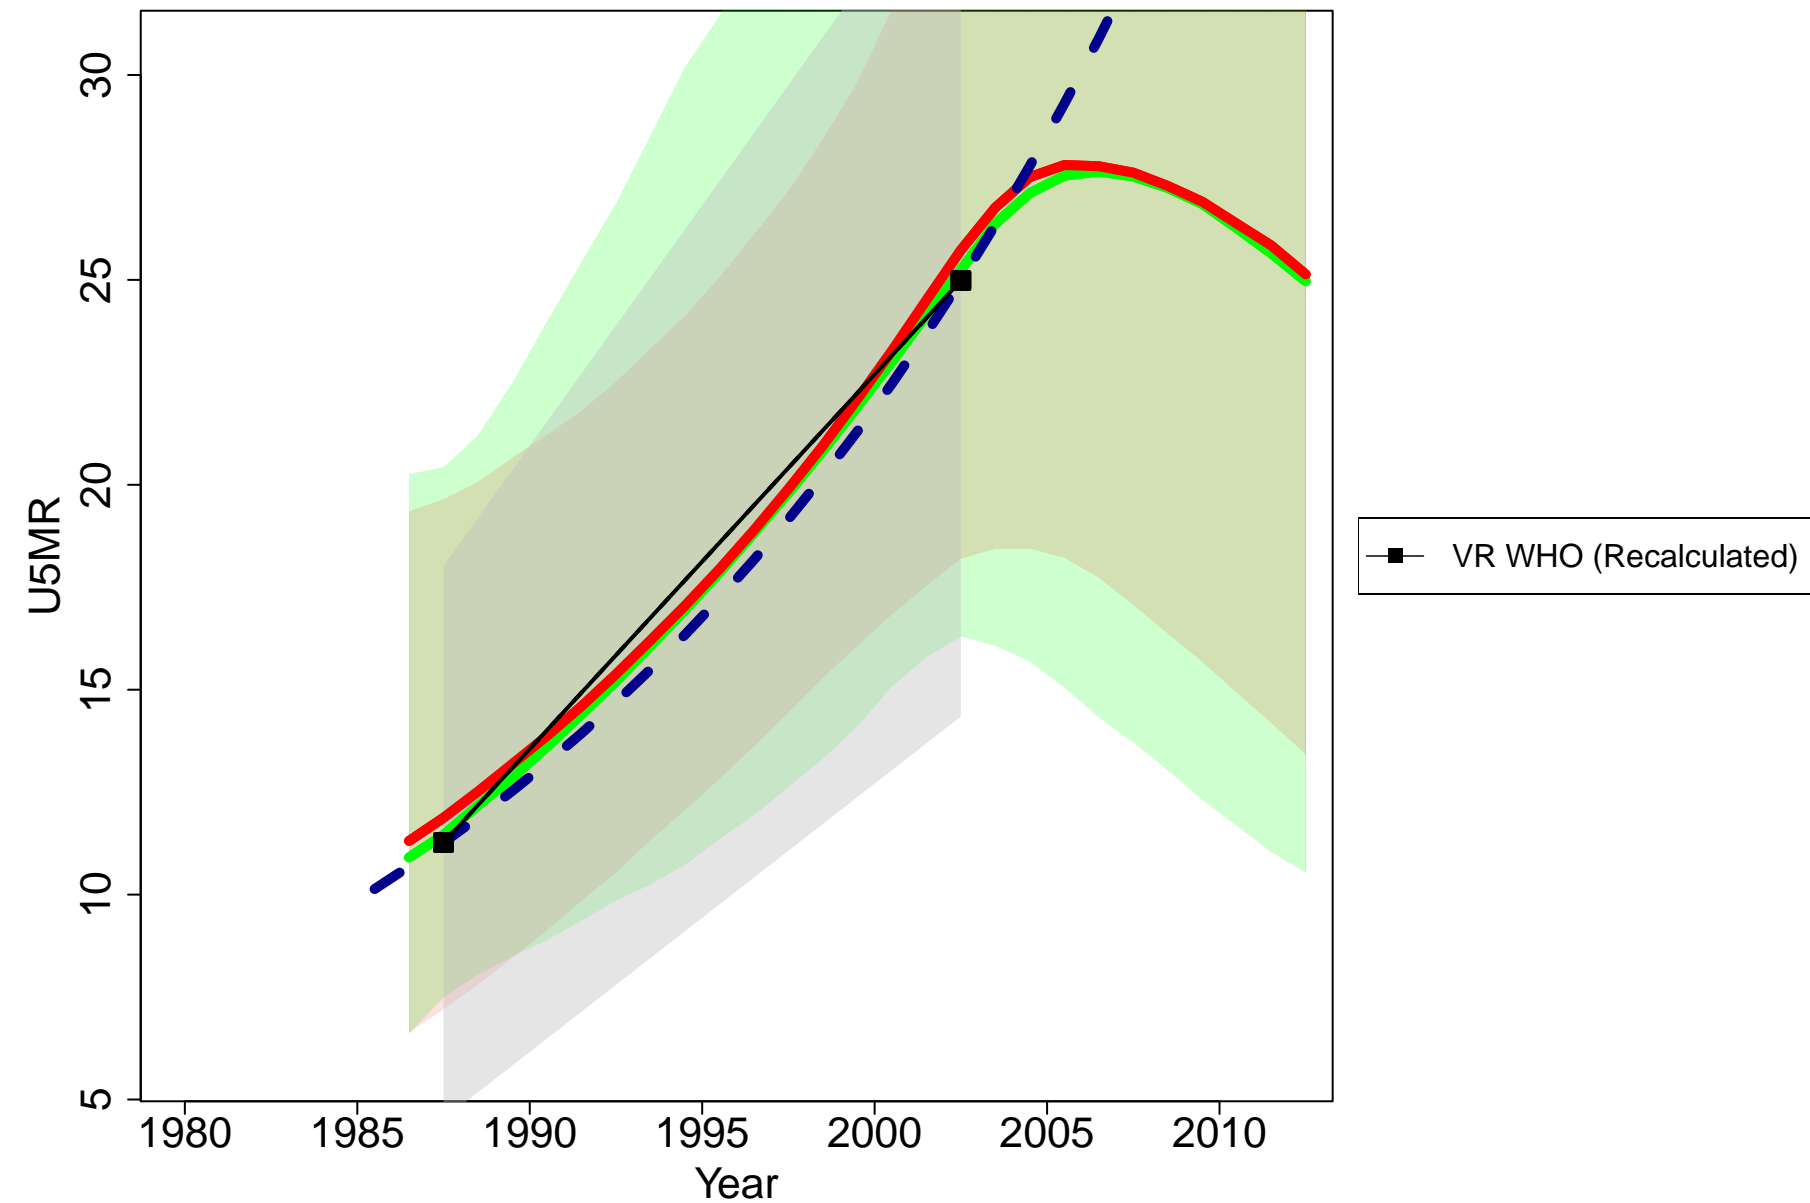

# Oman

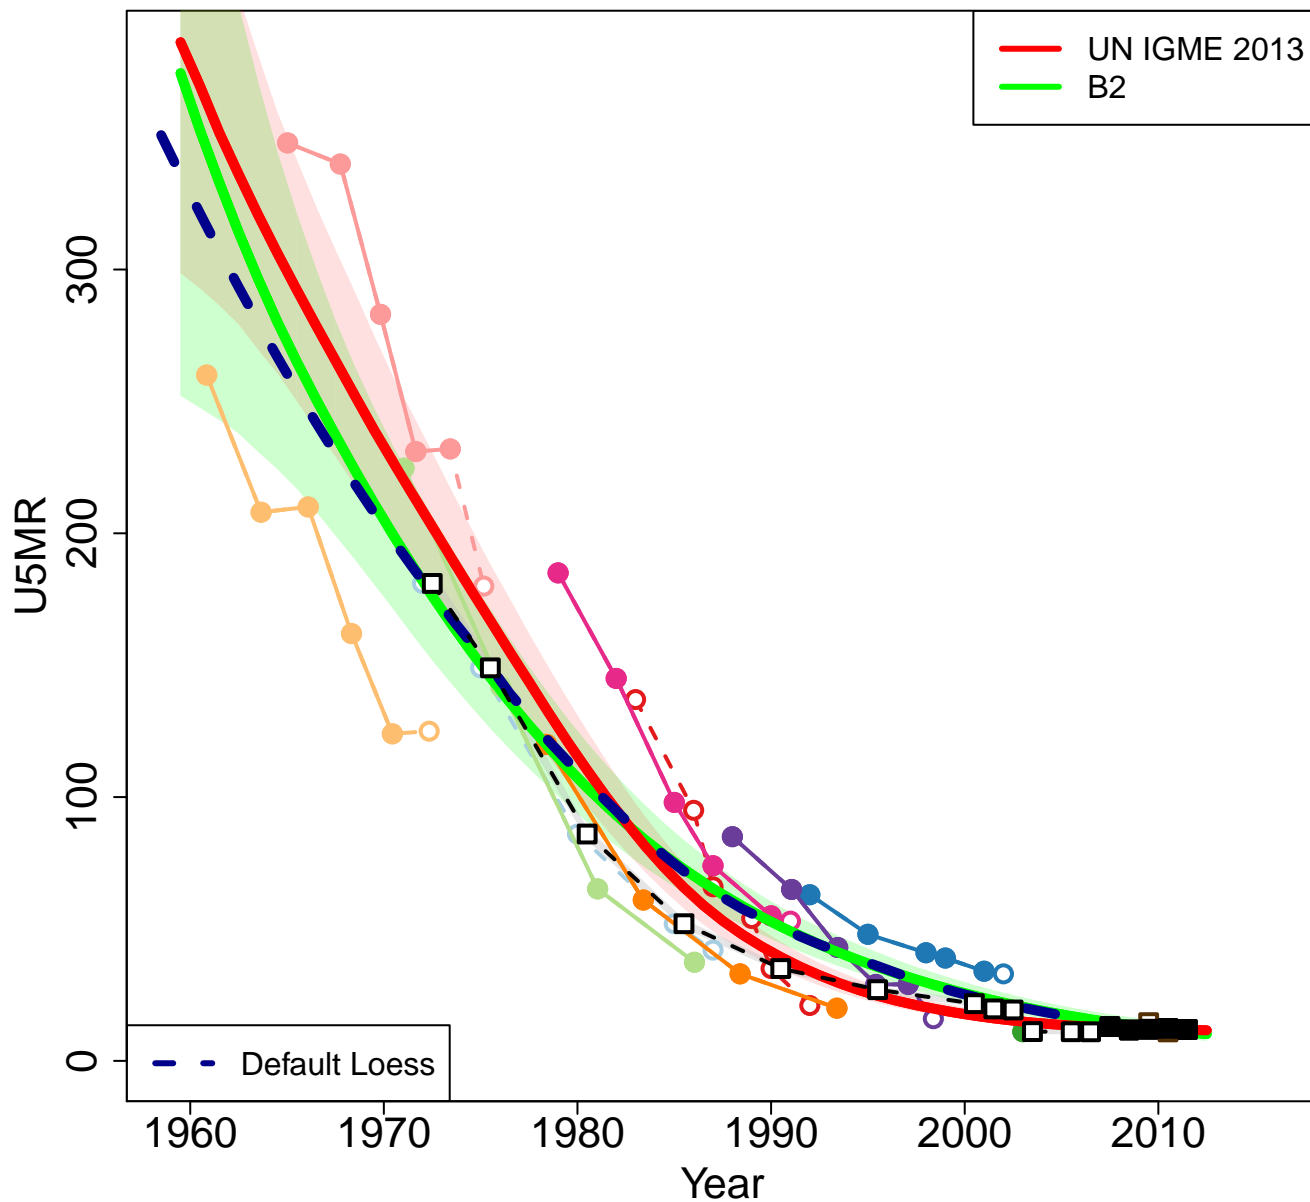

# Zoomed in

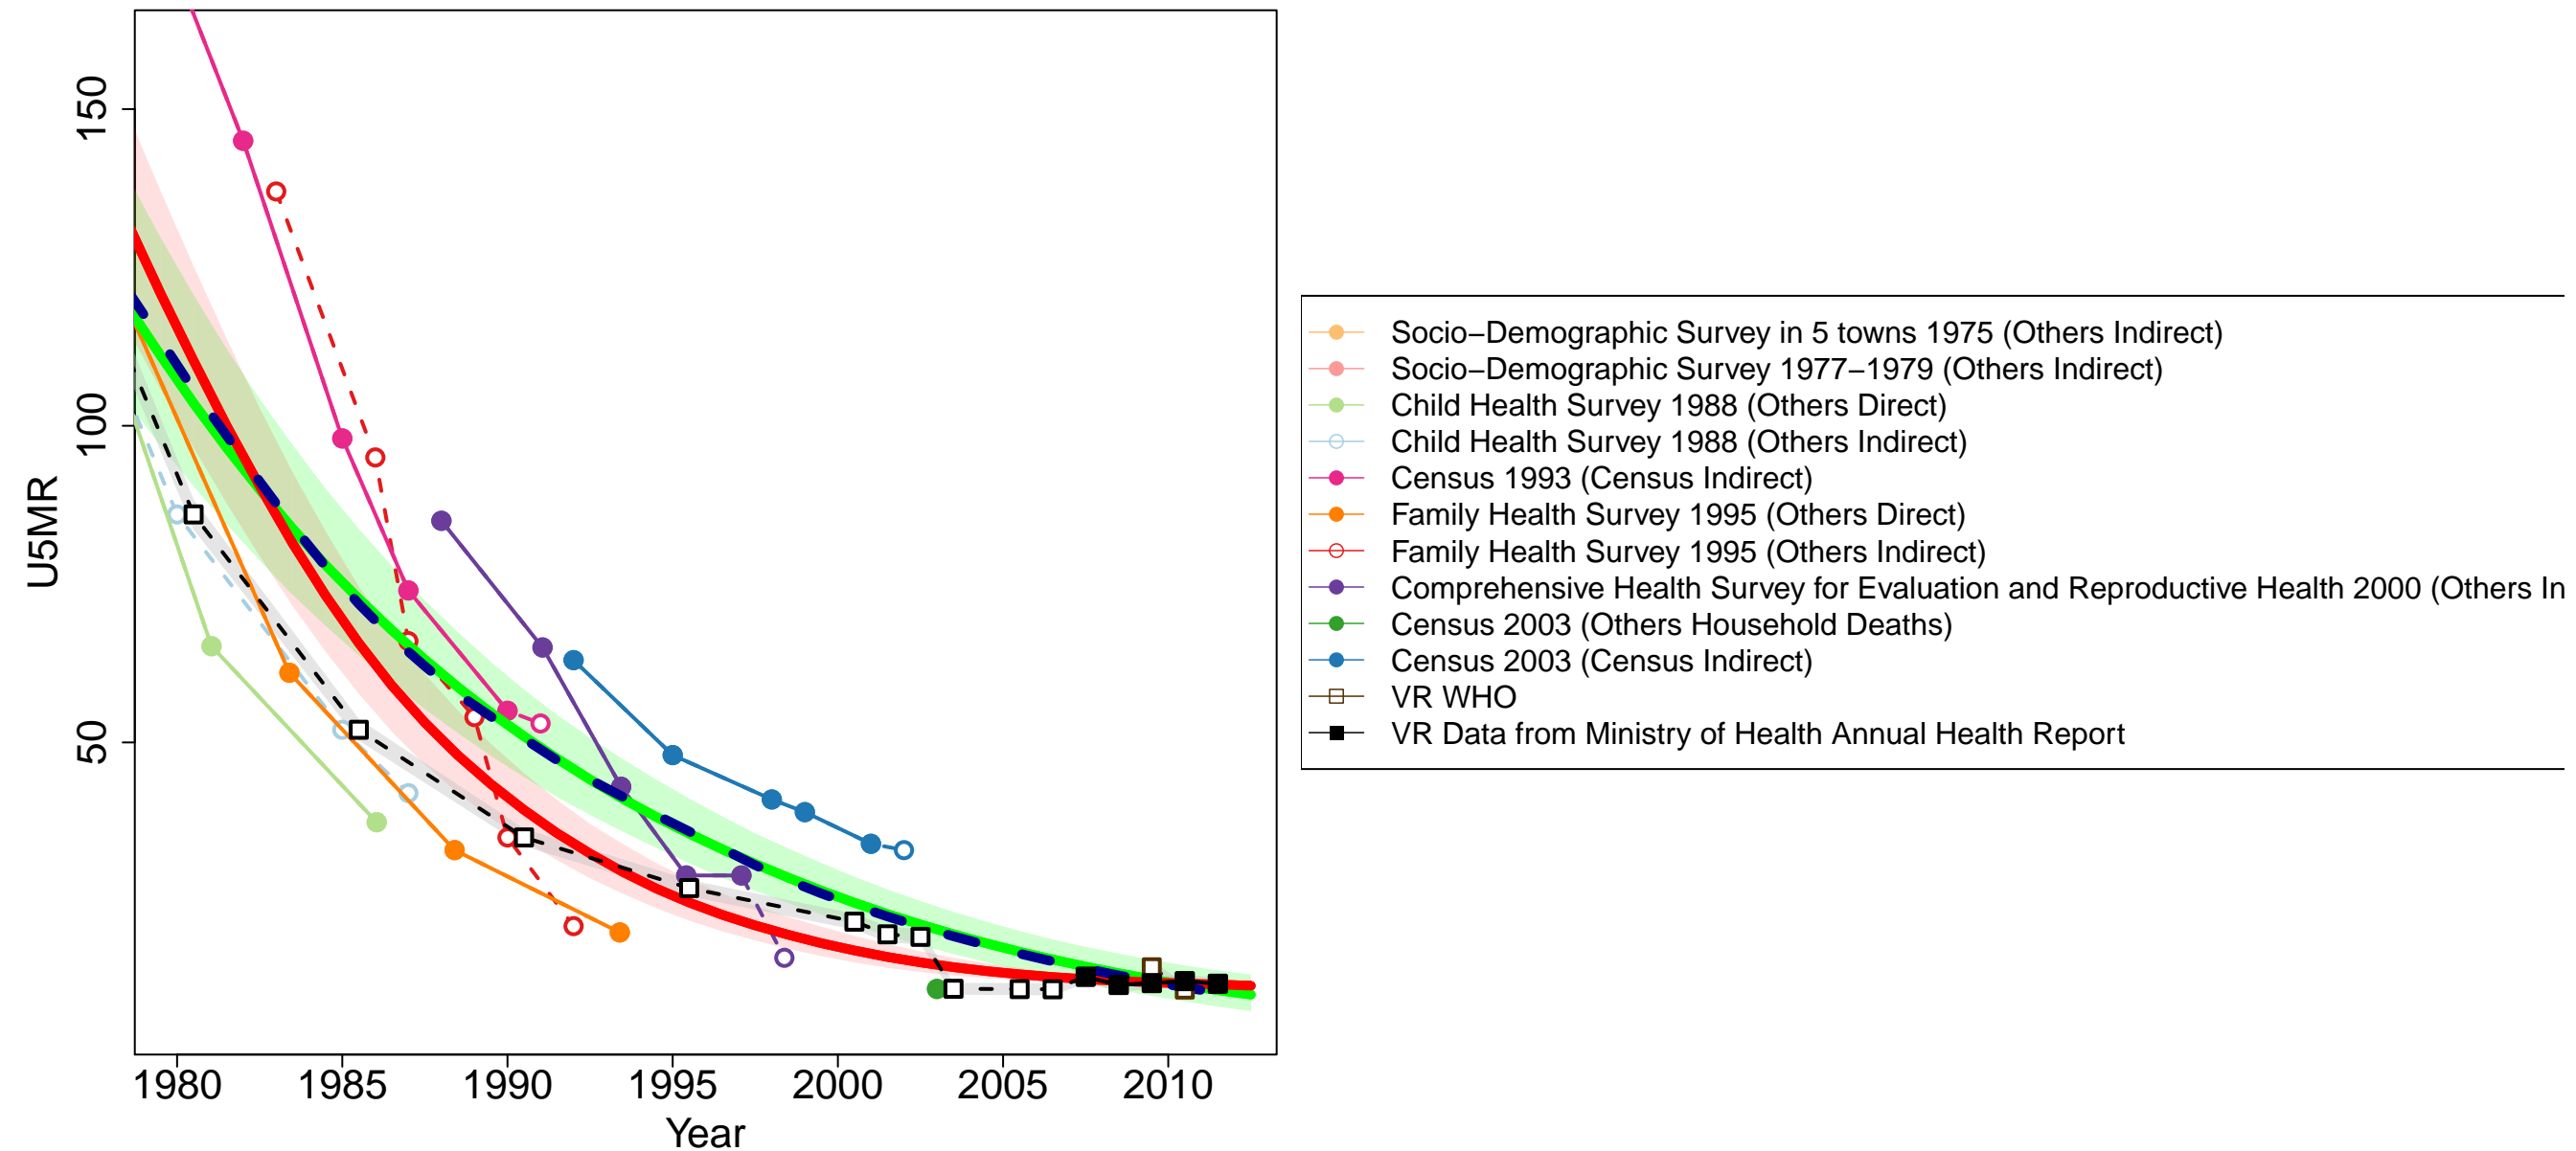

# Pakistan

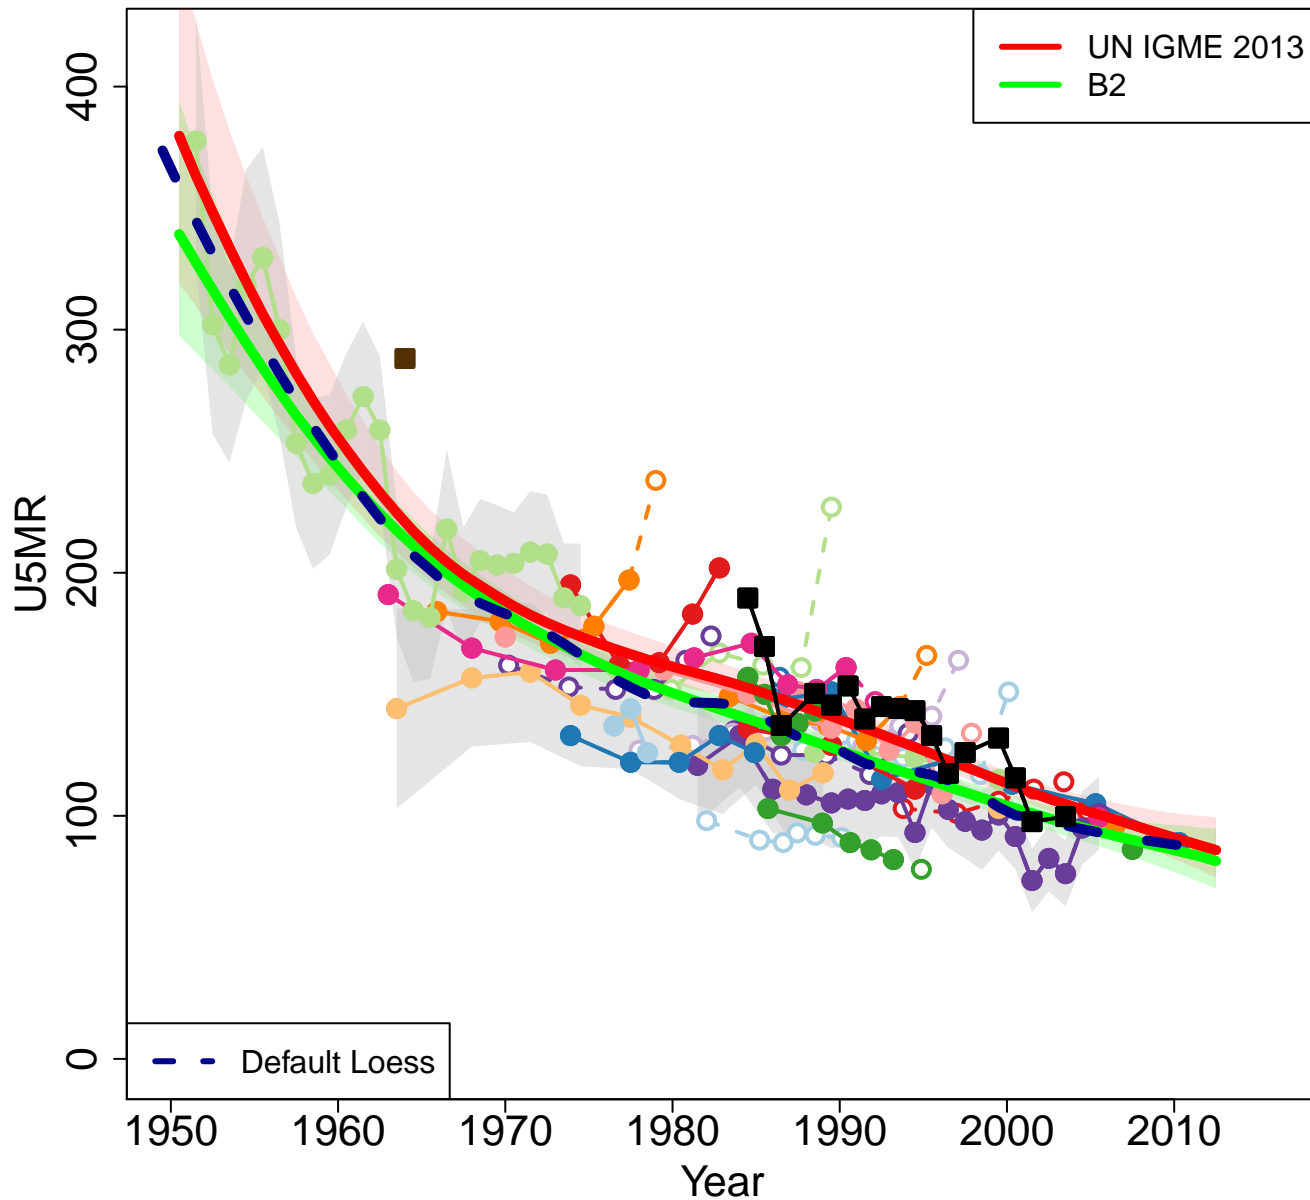

# Zoomed in

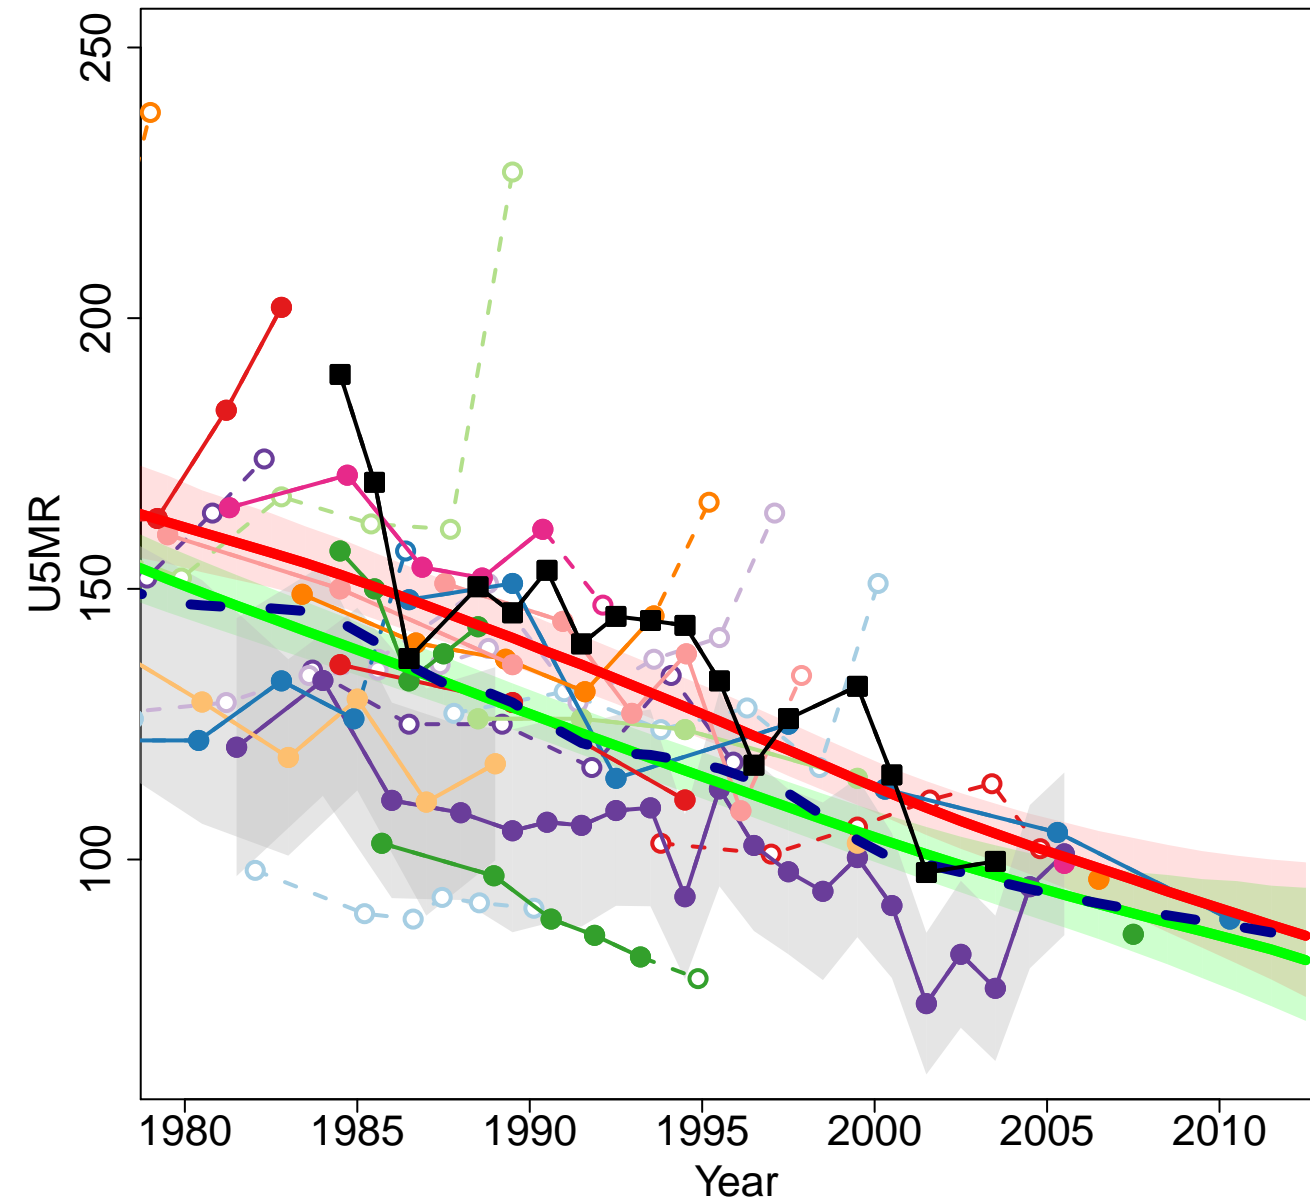

- Population Growth Survey I 1971 (Others Direct)
- World Fertility Survey 1975 (Other DHS Direct)
- Population Growth Survey II 1976–1978 (Others Direct)
- Labour Force and Migration Survey 1980 (Others Direct)
- Census 1981 (Census Indirect)
- Contraceptive Prevalence Survey 1984 (Others Indirect)
- Demographic Survey 1984 (Others Indirect)
- Demographic Survey 1988 (Others Direct)
- Demographic Survey 1988 (Others Indirect)
- Demographic and Health Survey 1990–1991 (DHS Indirect)
- Demographic and Health Survey 1990–1991 (DHS Direct)
- Living Standards Survey 1991 (Others Direct)
- Living Standards Survey 1991 (Others Indirect)
- Contraceptive Prevalence Survey 1993 (Others Indirect)
- Contraceptive Prevalence Survey 1994–1995 (Others Indirect)
- Integrated Household Survey 1996 (Others Indirect)
- Pakistan Fertility and Family Planning Survey 1996 (Others Direct)
- Pakistan Fertility and Family Planning Survey 1996 (Others Indirect)
- Census 1998 (Census Indirect)
- Integrated Household Survey 1998 (Others Direct)
- Integrated Household Survey 1998 (Others Indirect)
- Reproductive Health and Family Planning Survey 2000–2001 (Others Direct)
- Reproductive Health and Family Planning Survey 2000–2001 (Others Indirect)
- Integrated Household Survey 2001 (Others Direct)
- Integrated Household Survey 2001 (Others Indirect)
- Pakistan Demographic Survey 2005 (Others Household Deaths)
- Pakistan Demographic Survey 2006 (Others Household Deaths)
- Demographic and Health Survey 2006–2007 (DHS Indirect)
- Demographic and Health Survey 2006–2007 (DHS Direct)
- Pakistan Demographic Survey 2007 (Others Household Deaths)
- Demographic and Health Survey 2012–2013 (DHS Direct)
- VR Pop Growth Est Expmt
- VR Pakistan Demographic Survey

# Sao Tome & Principe

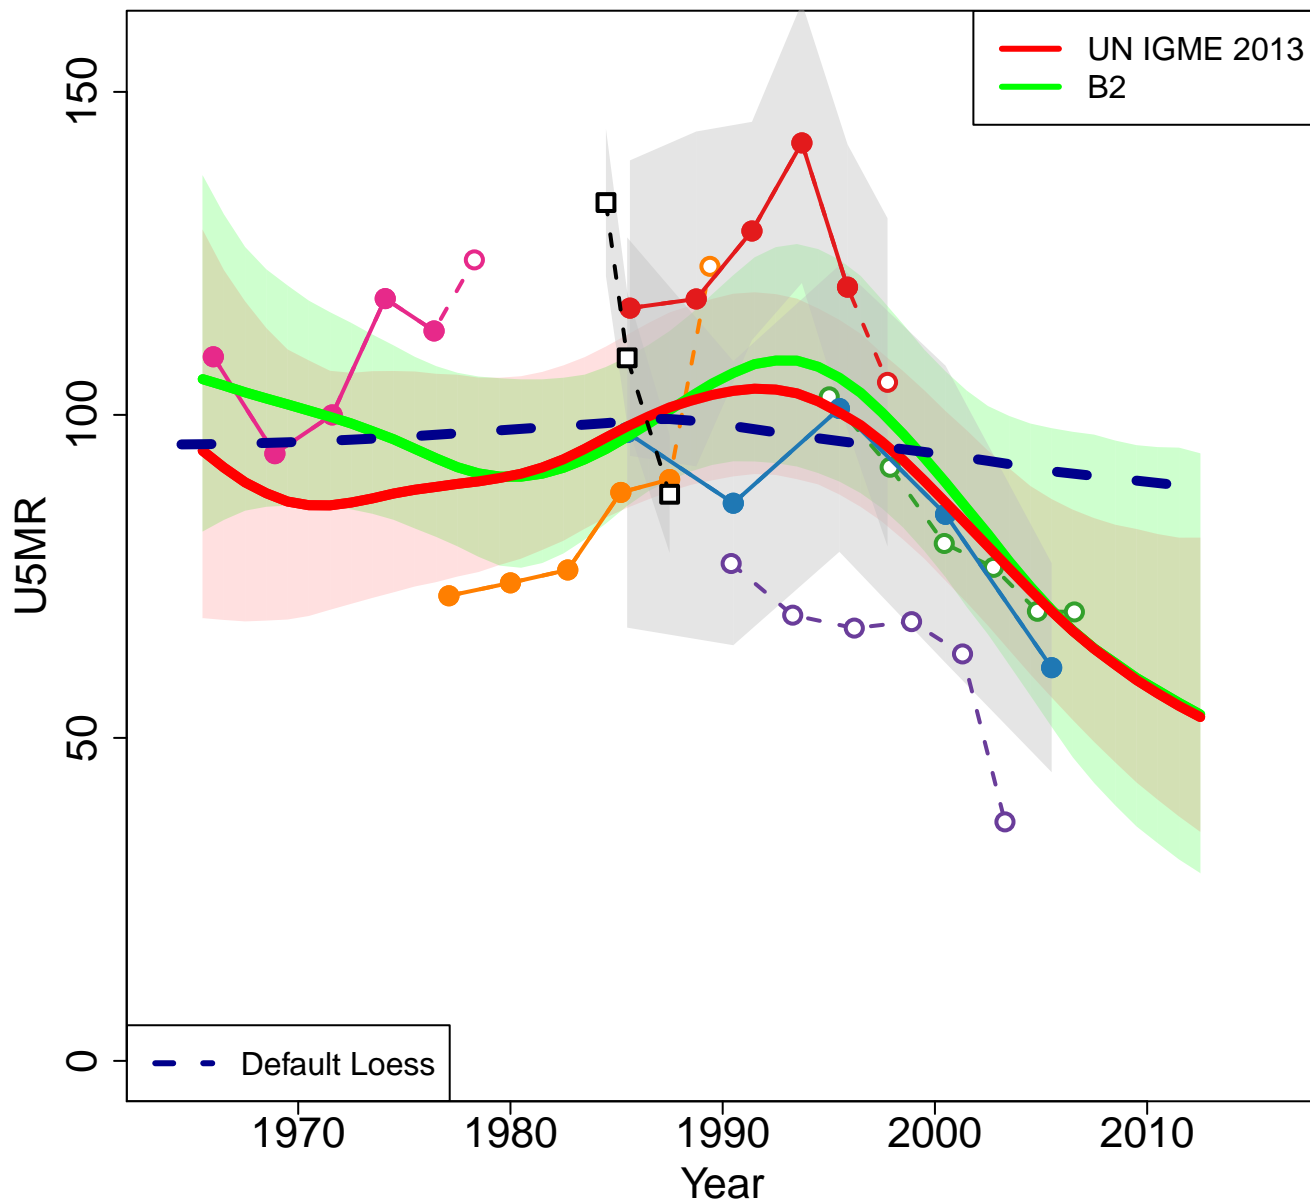

# Zoomed in

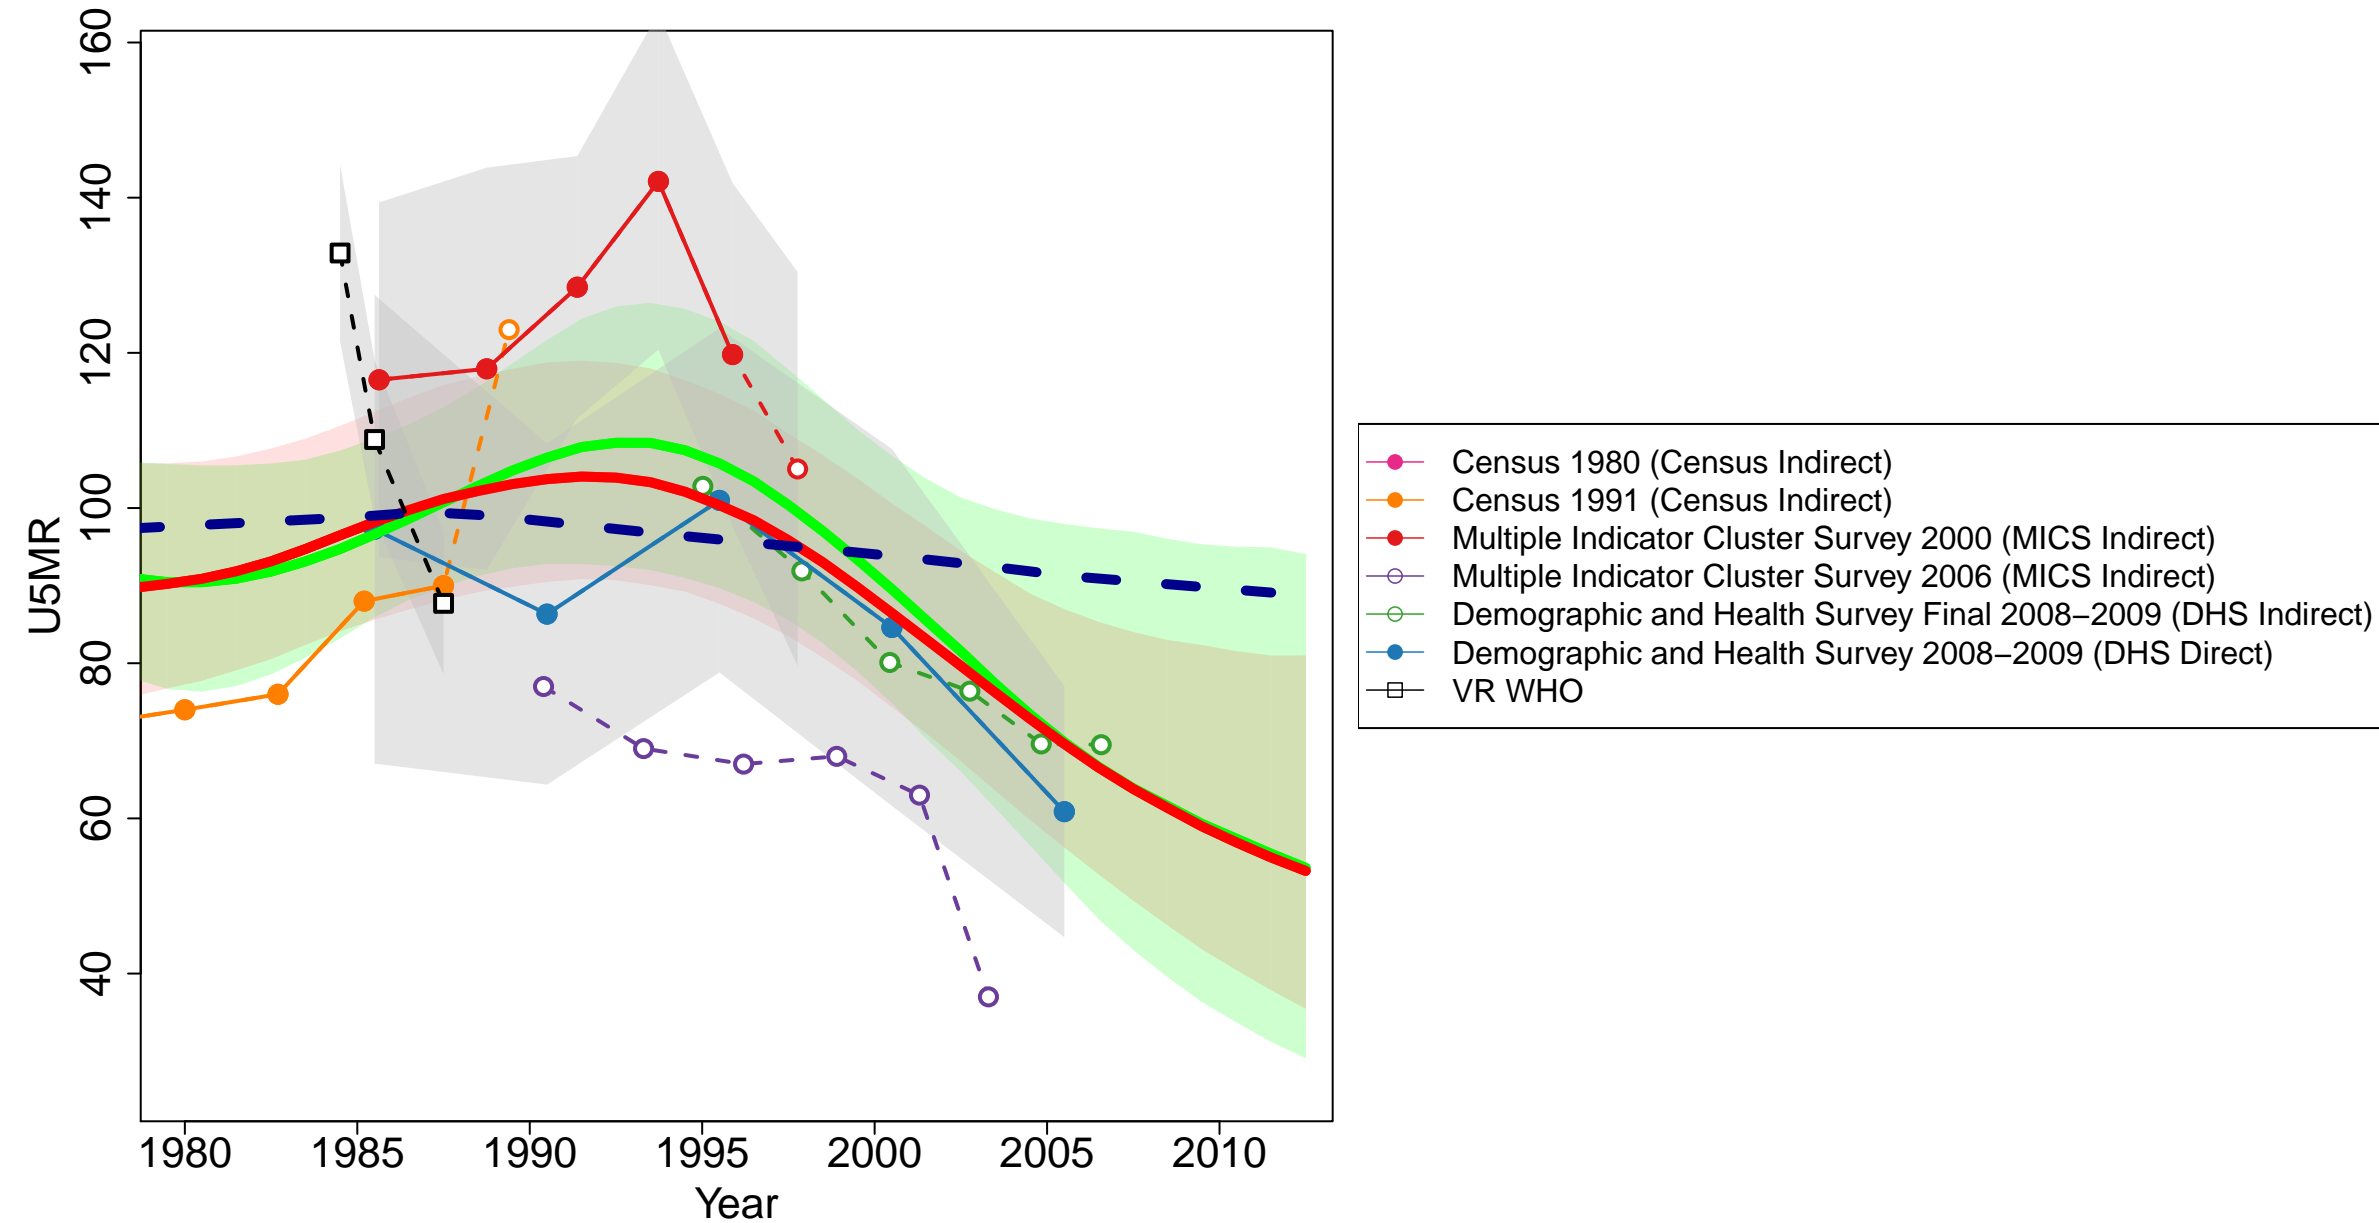

# Solomon Islands

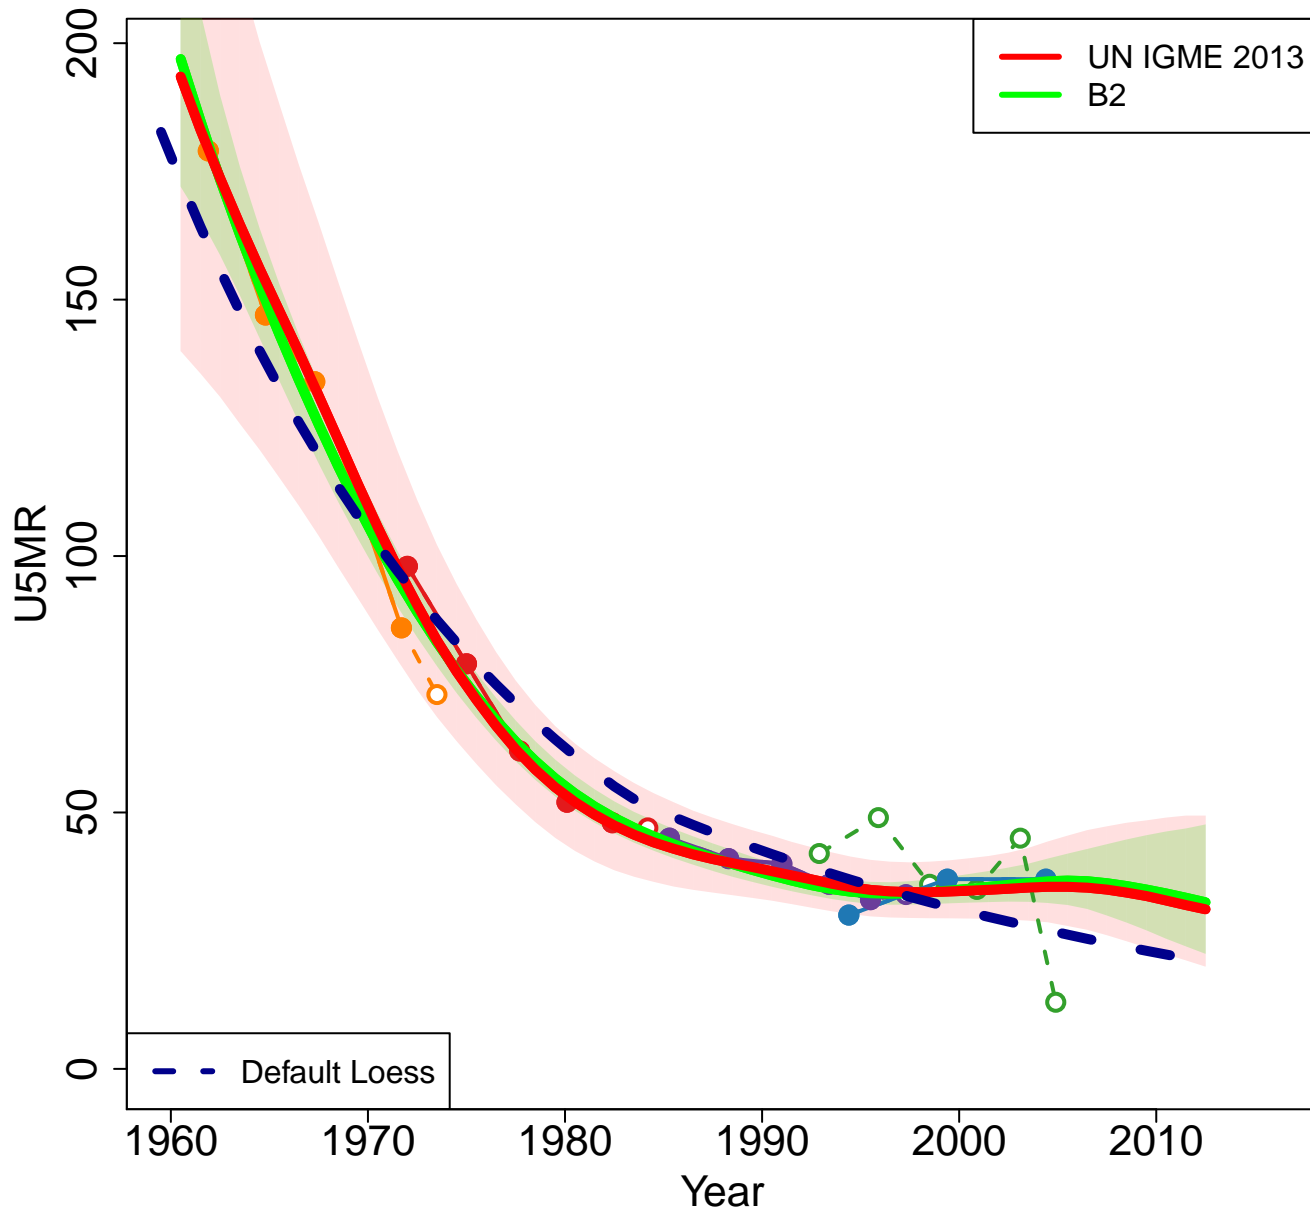

# Zoomed in

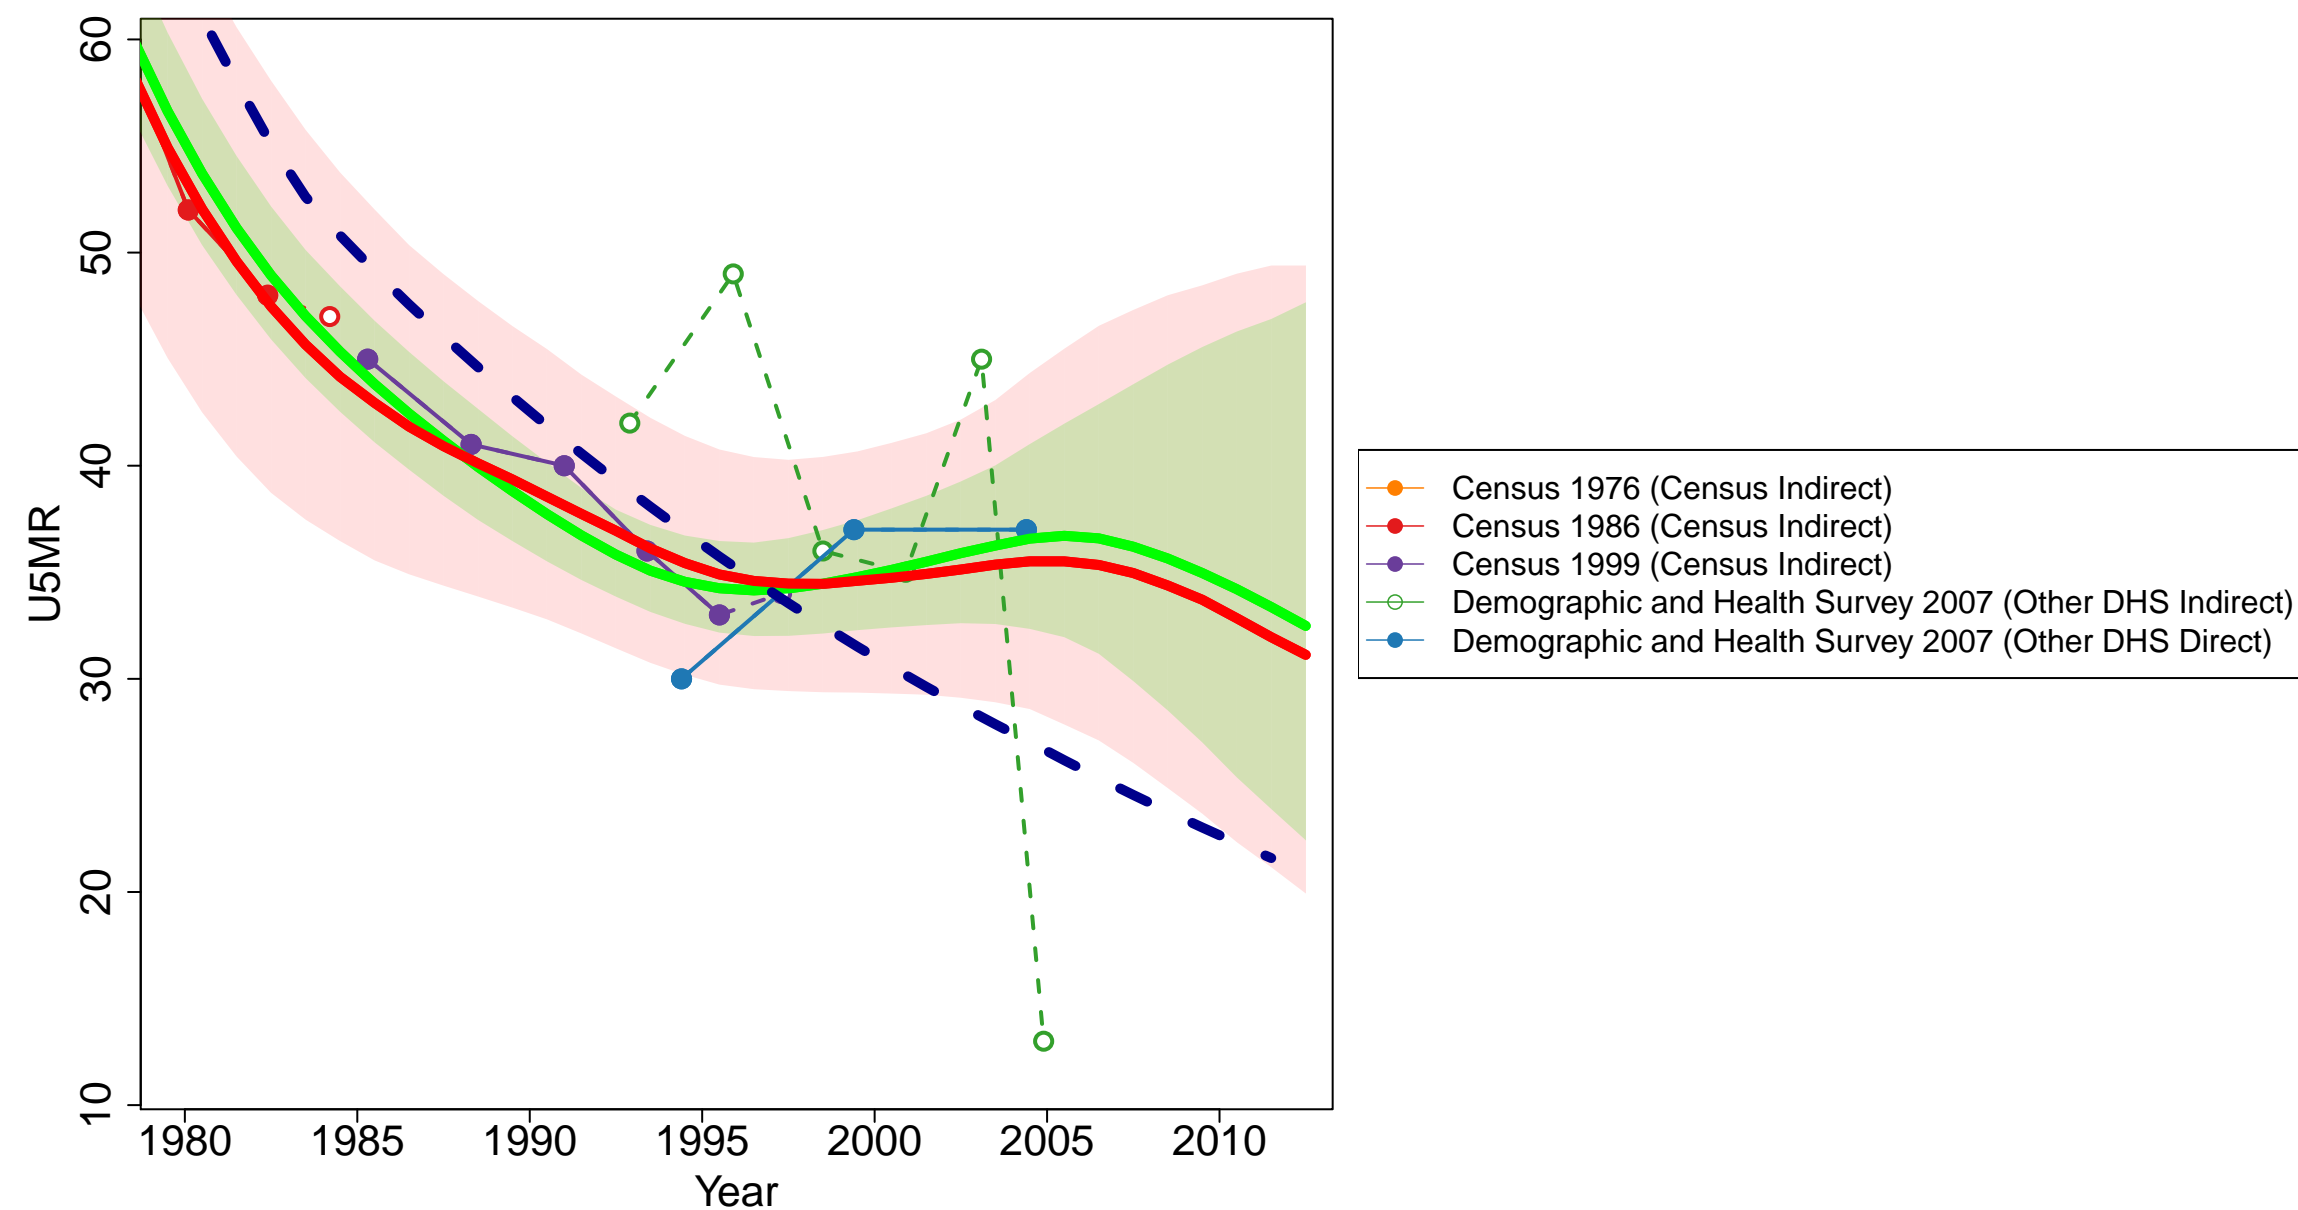



# South Sudan

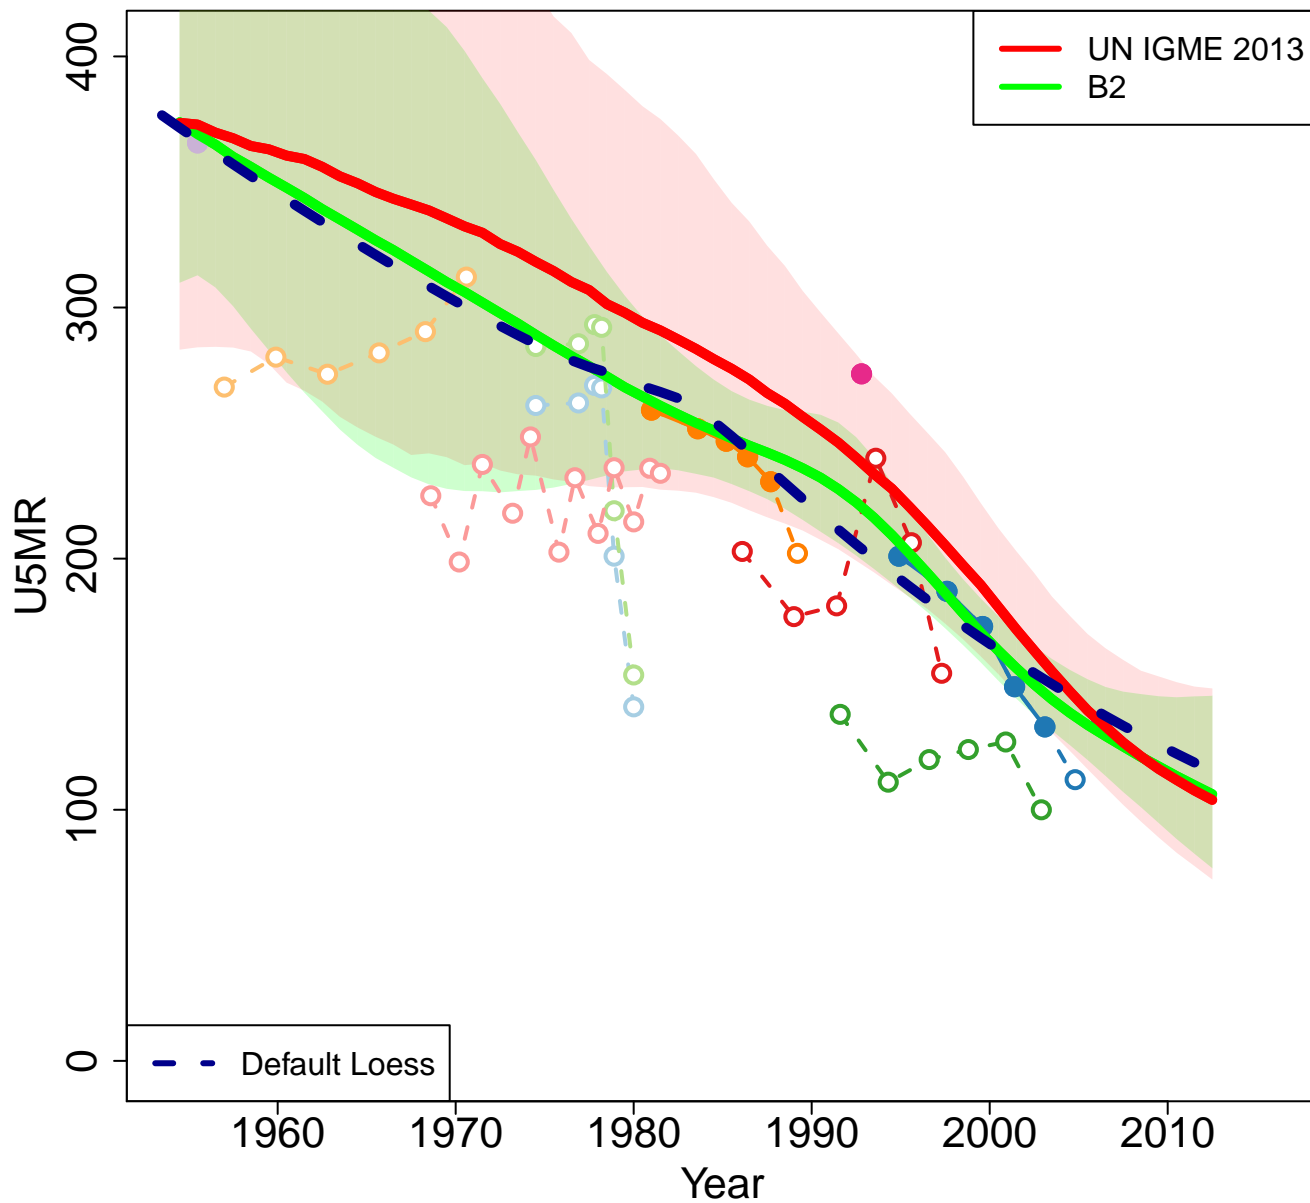

# Zoomed in

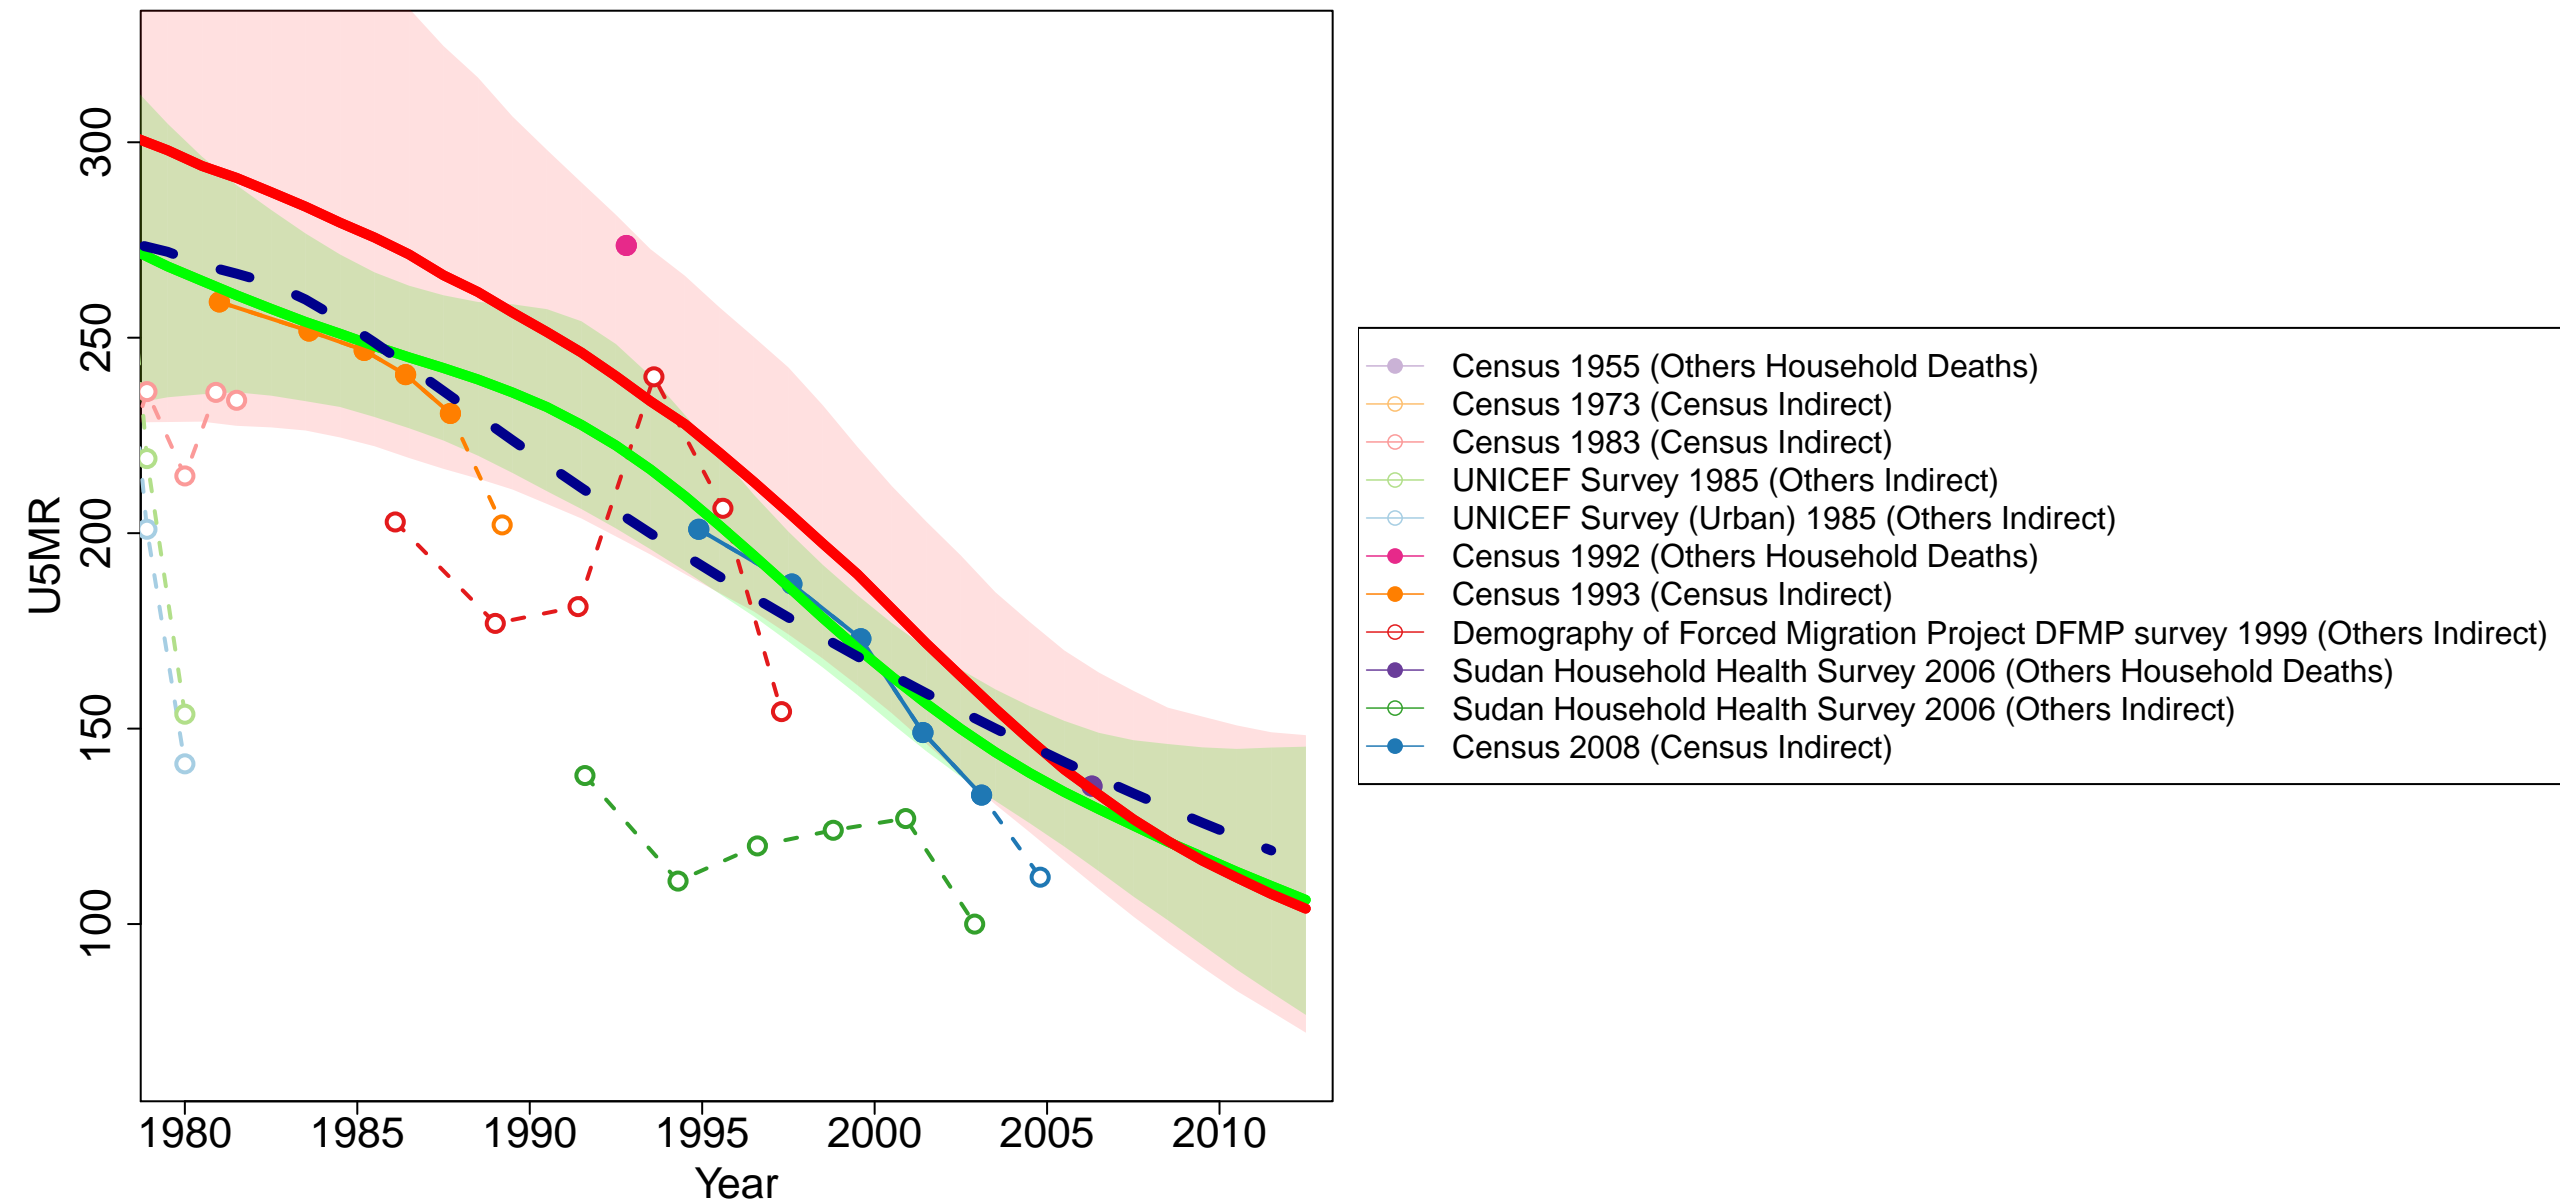

# Togo

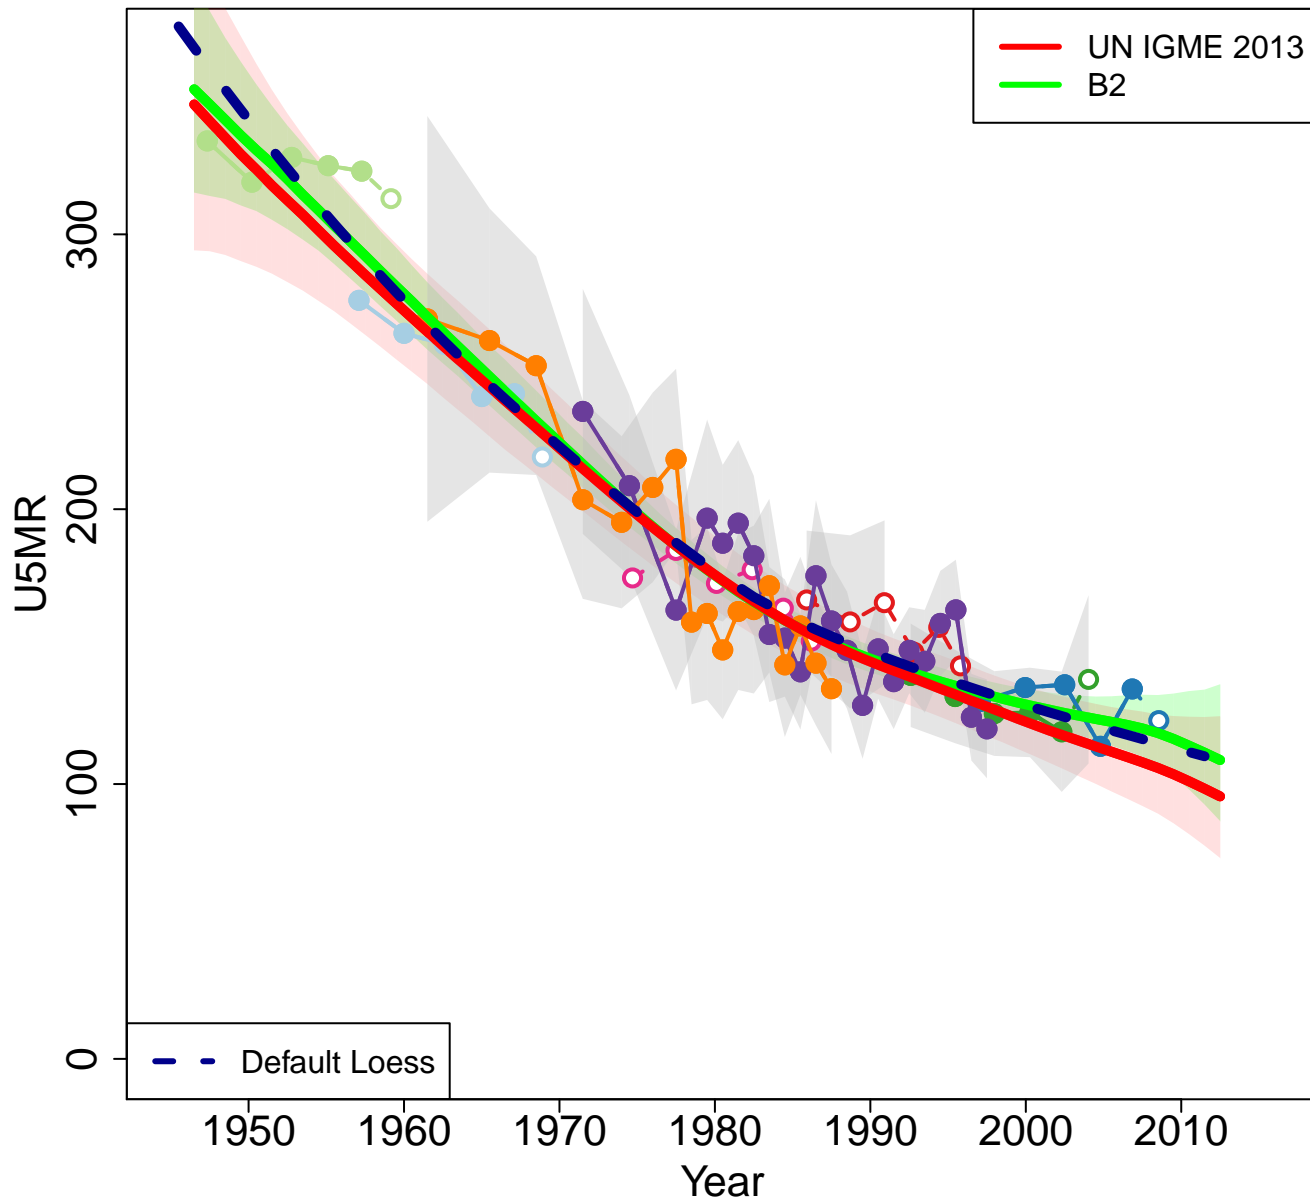

# Zoomed in

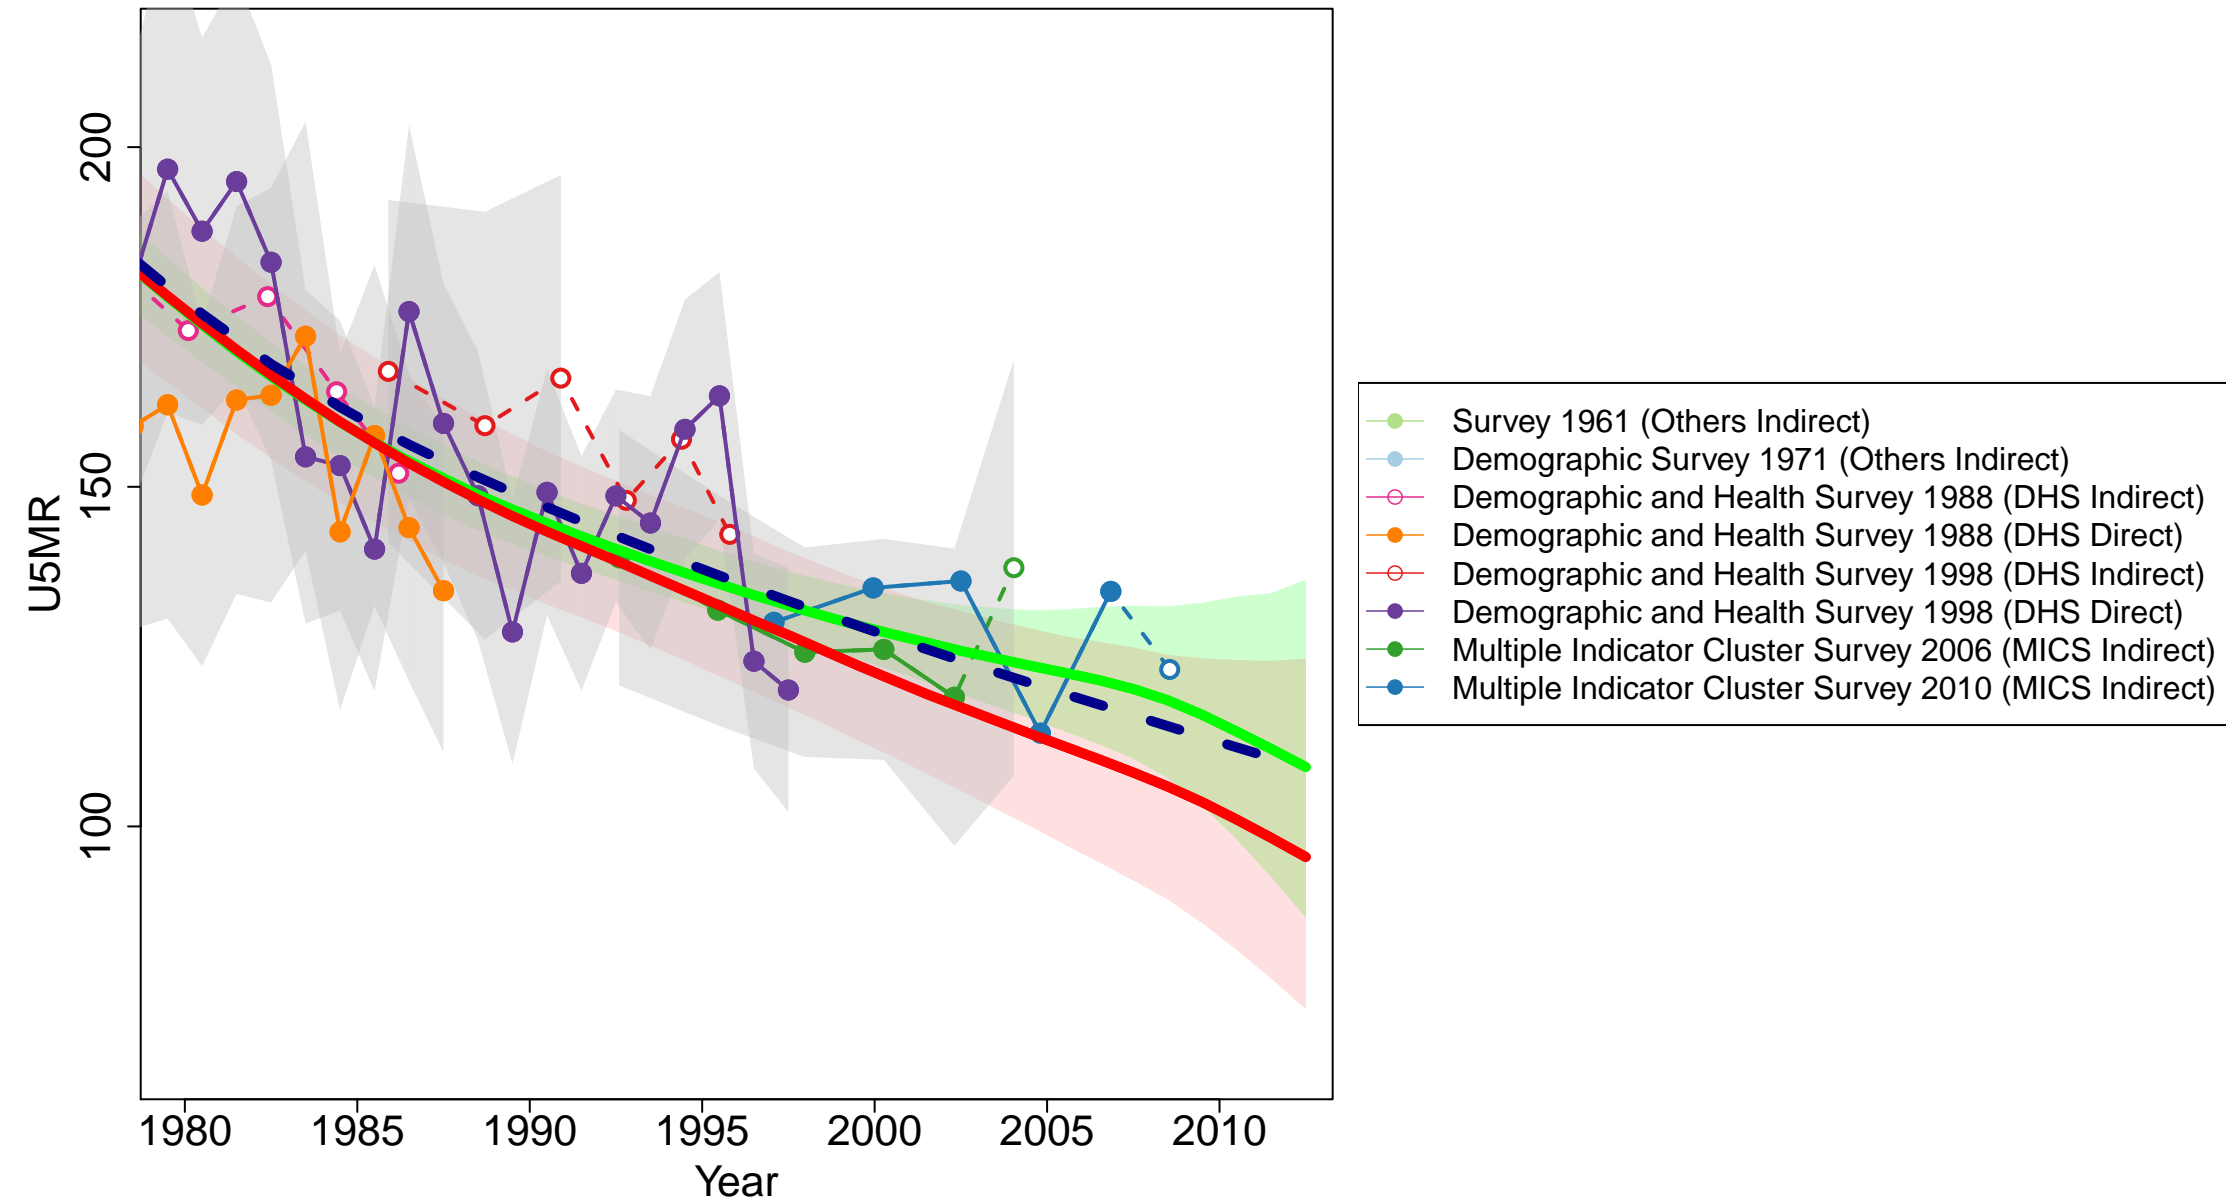

# Uzbekistan

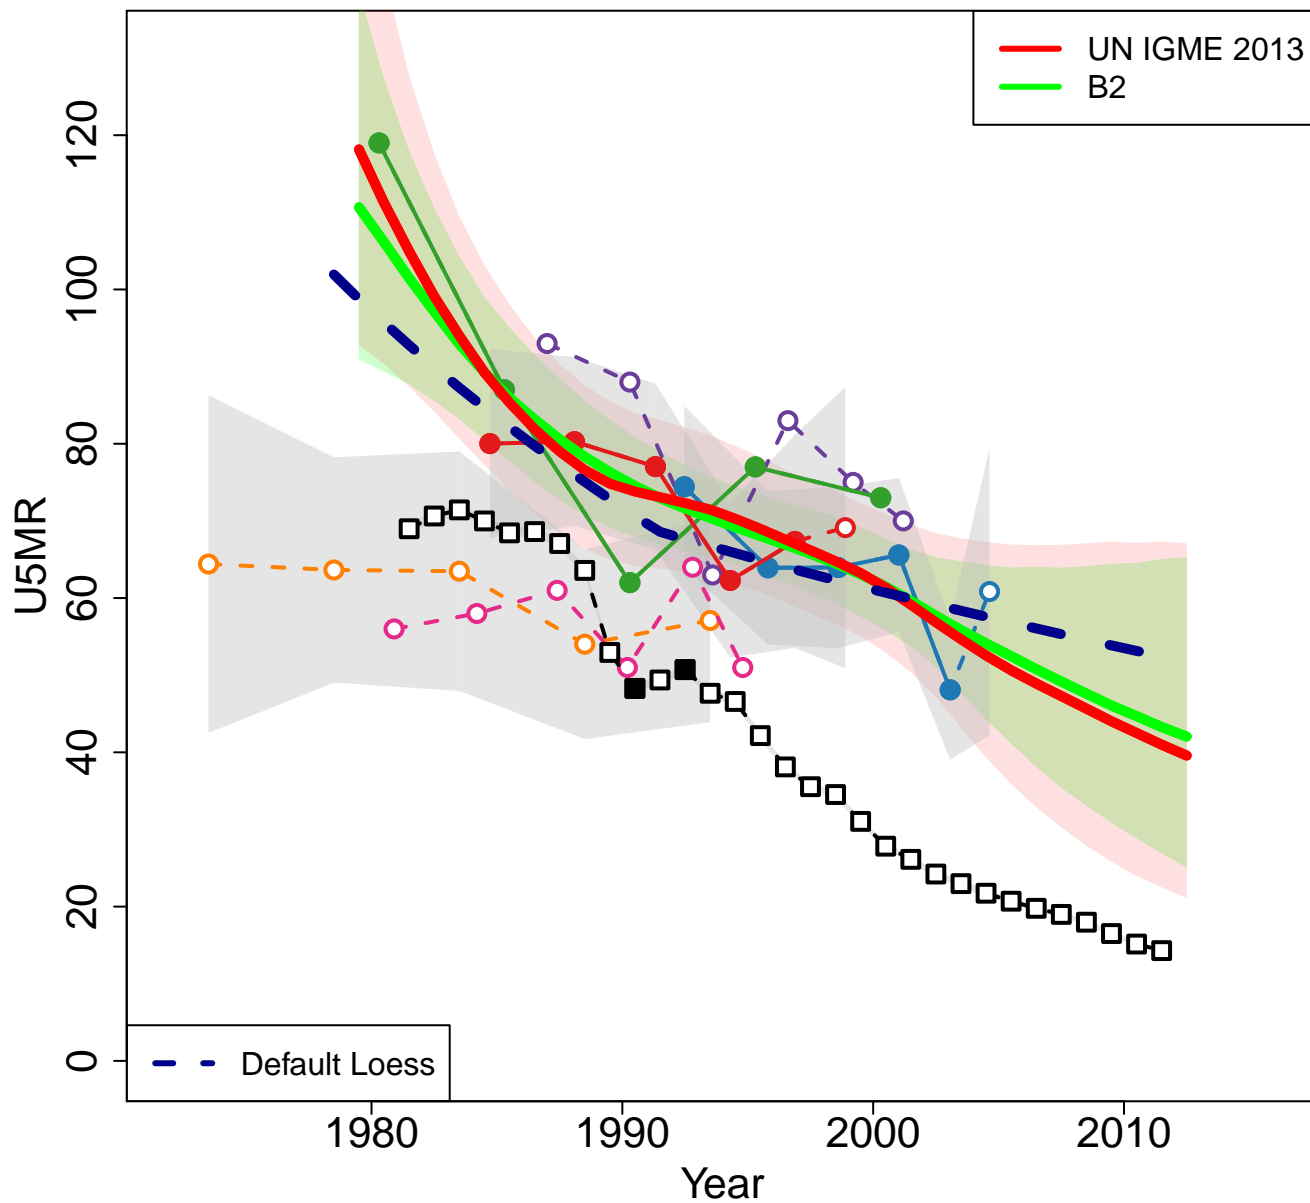

# Zoomed in

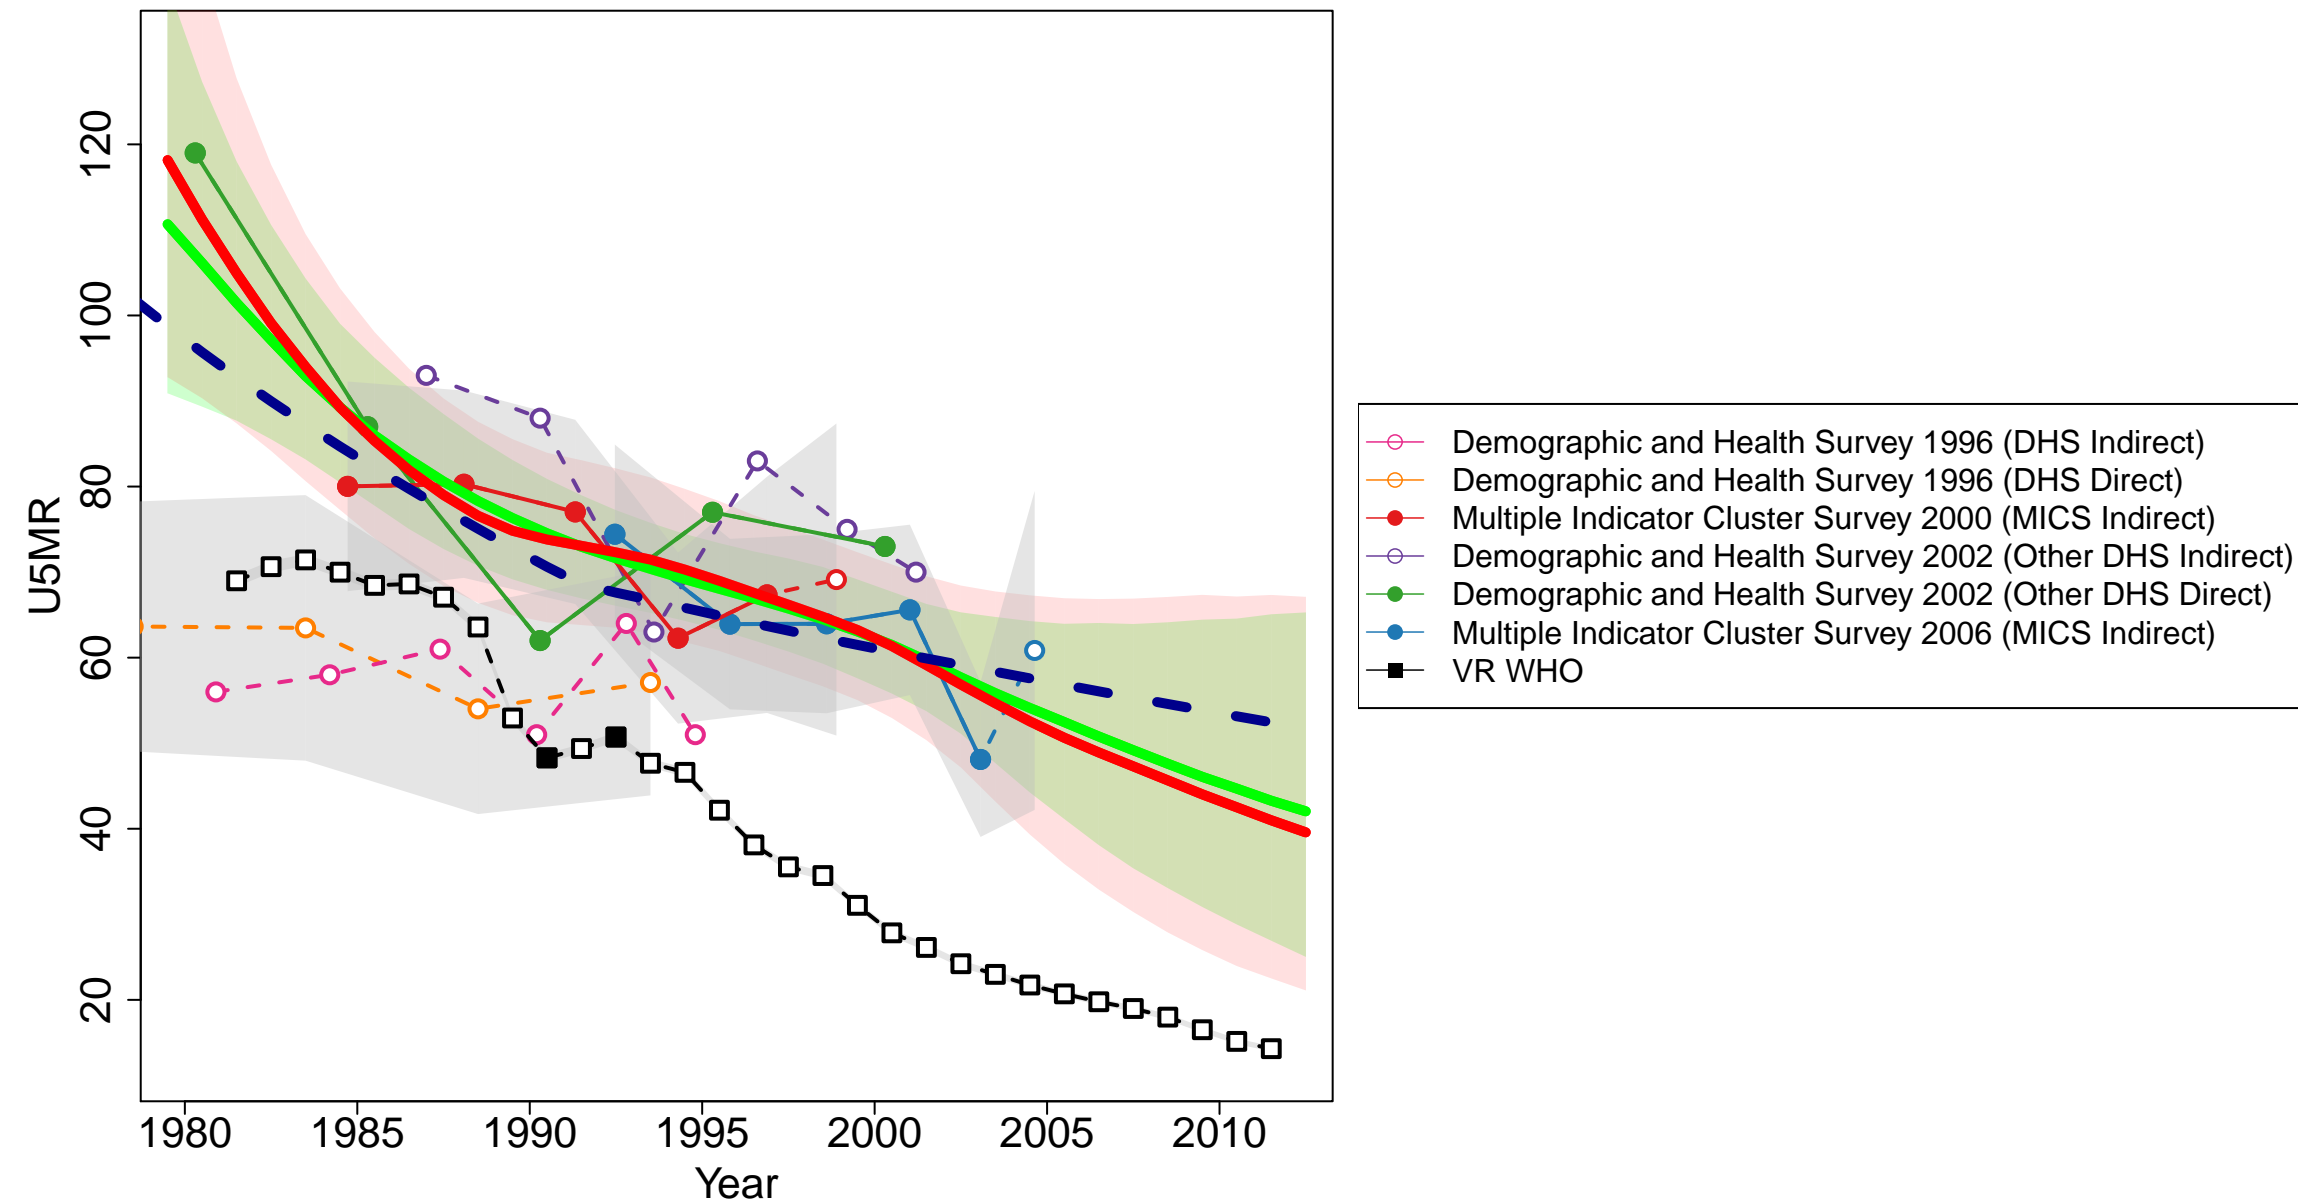

# Yemen

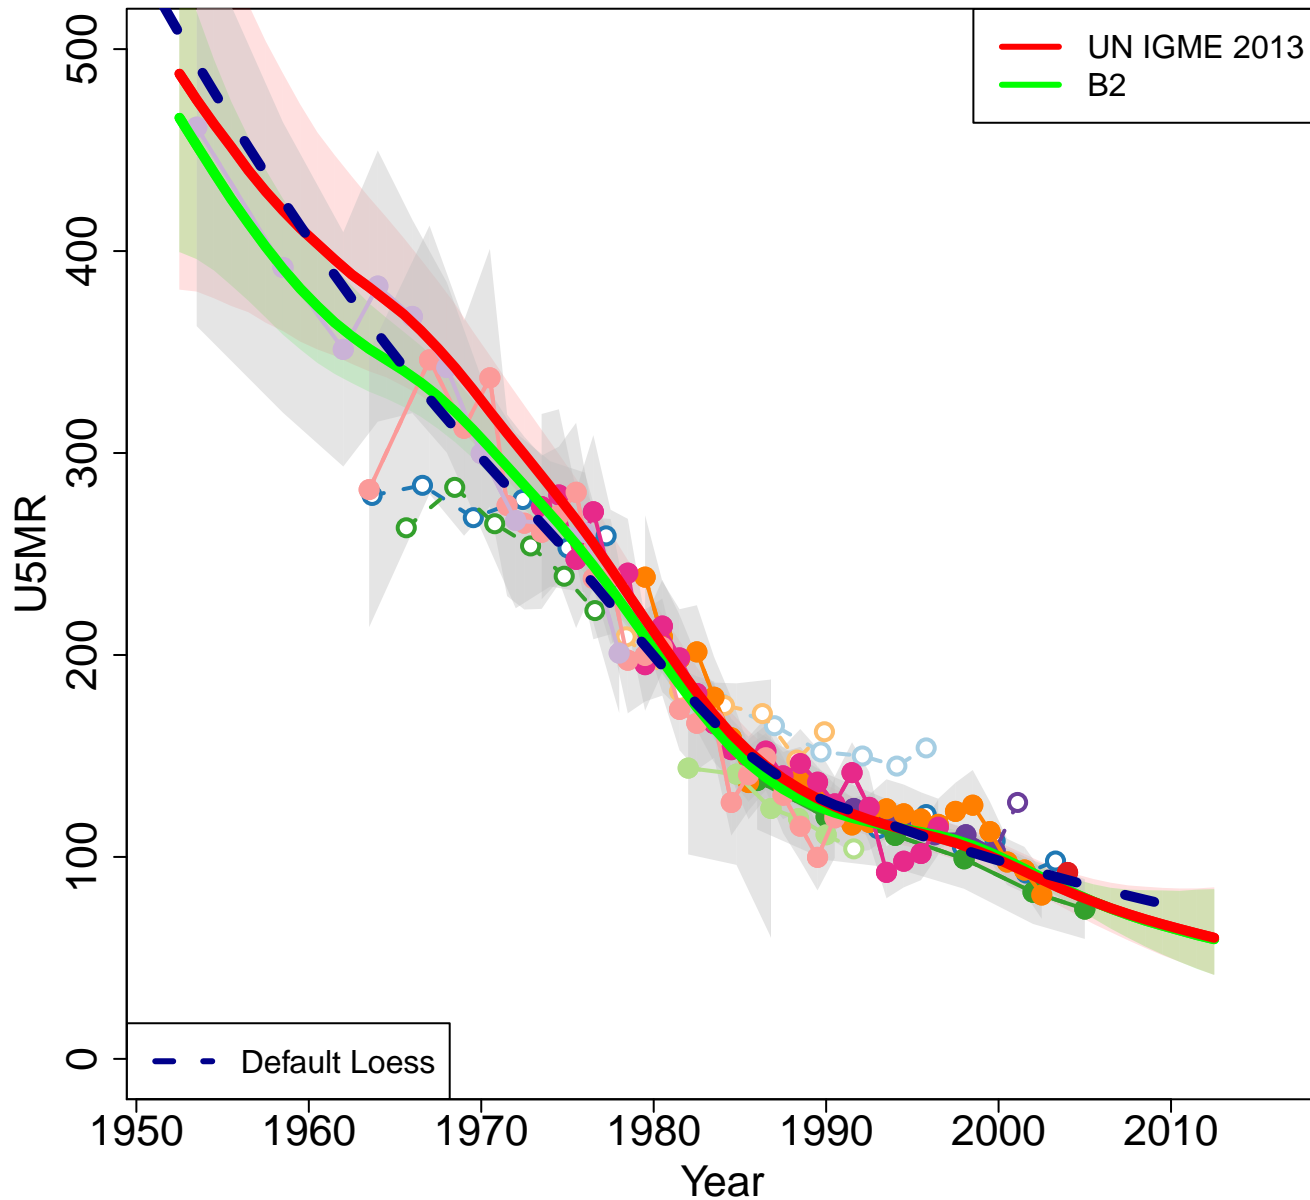

# Zoomed in

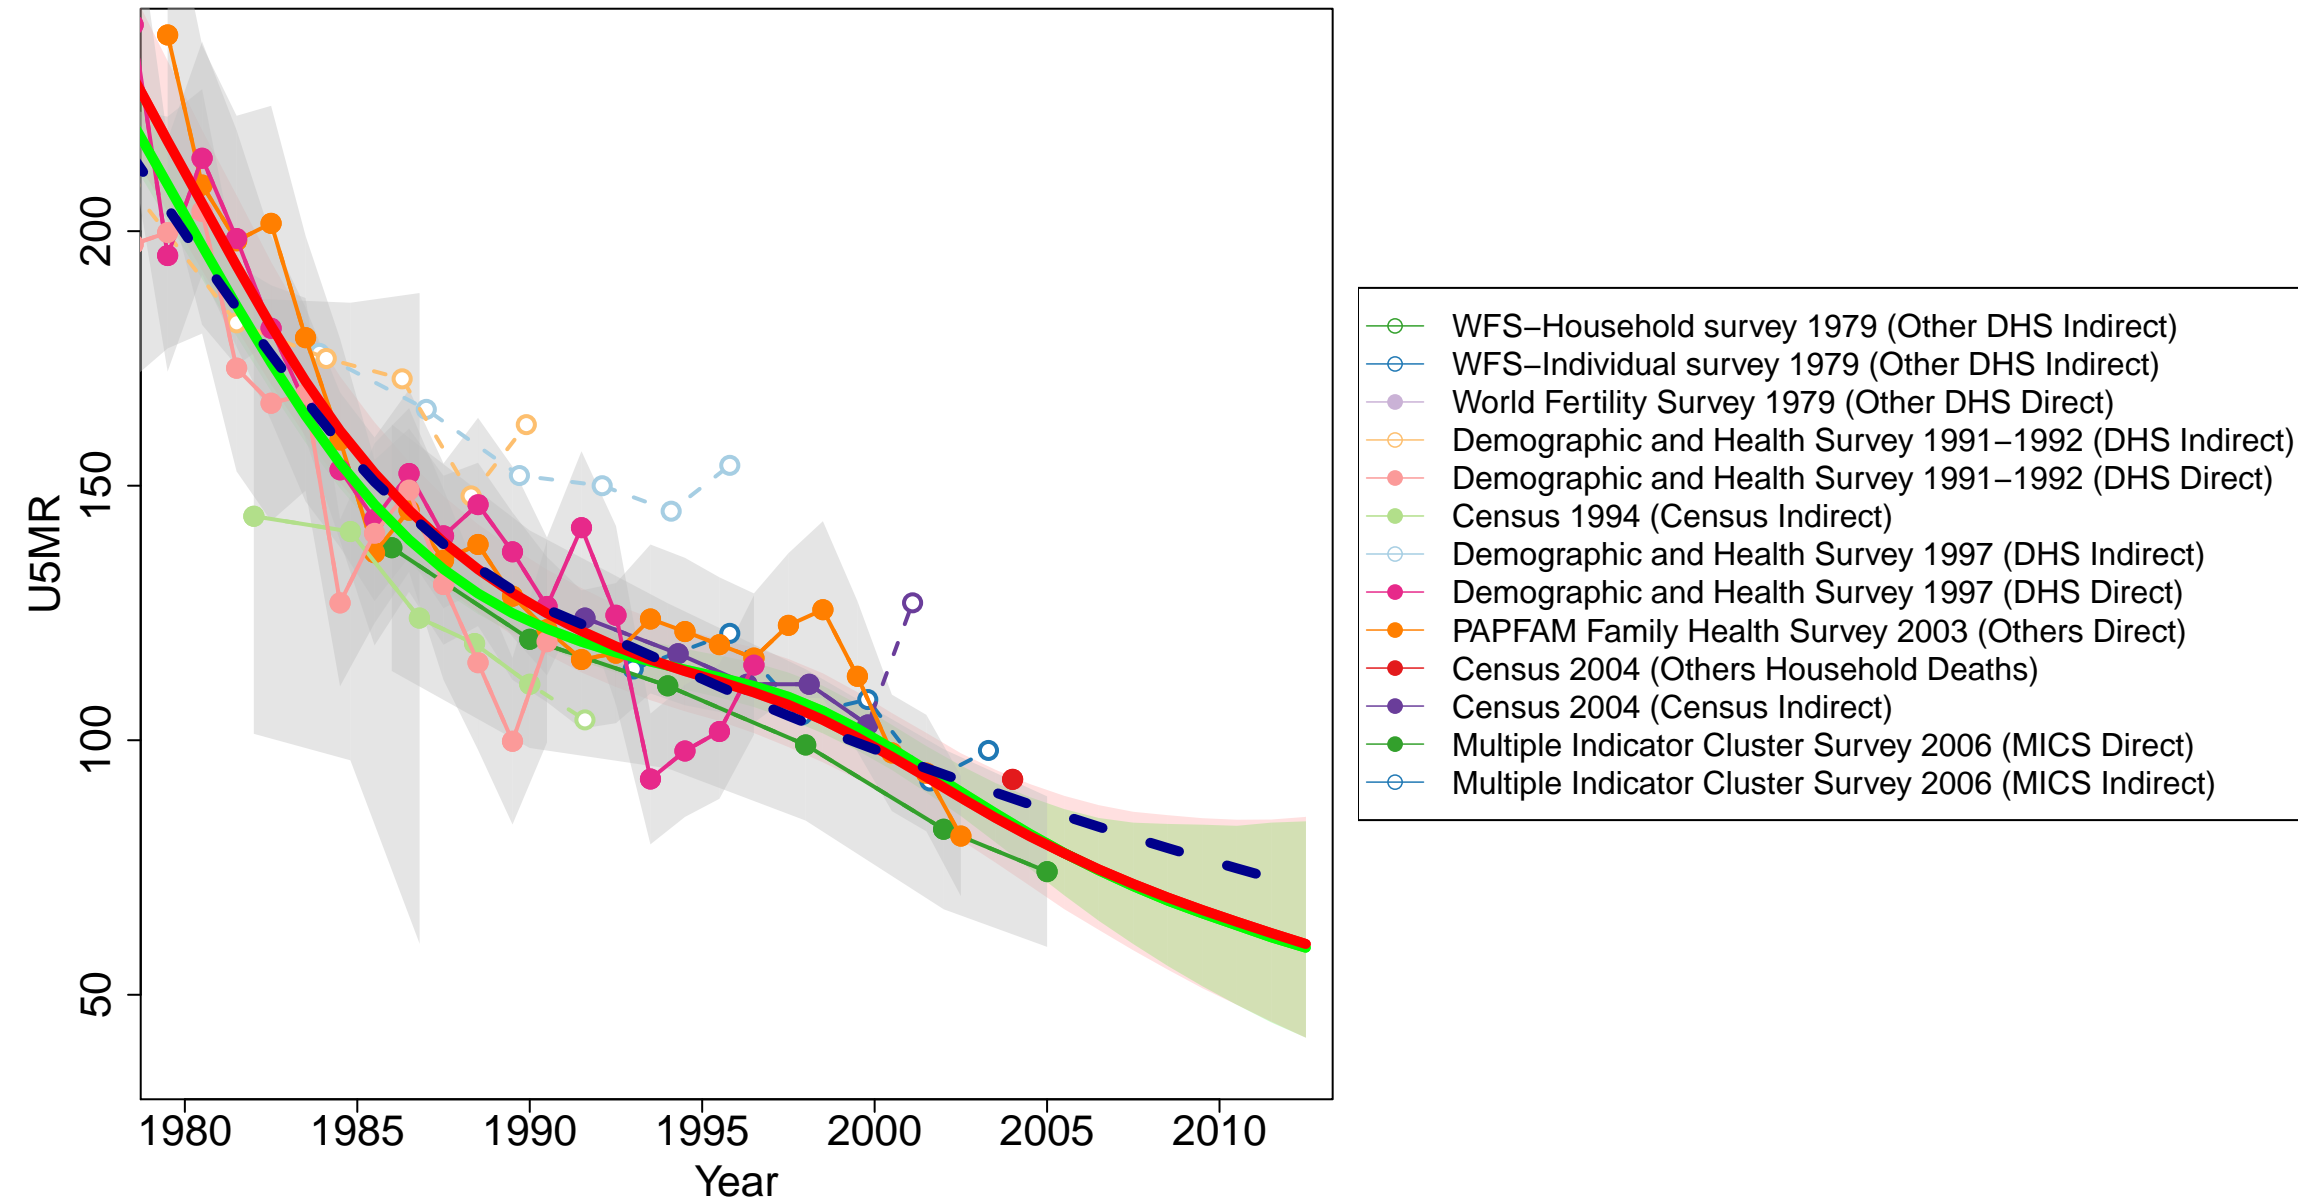

# Botswana

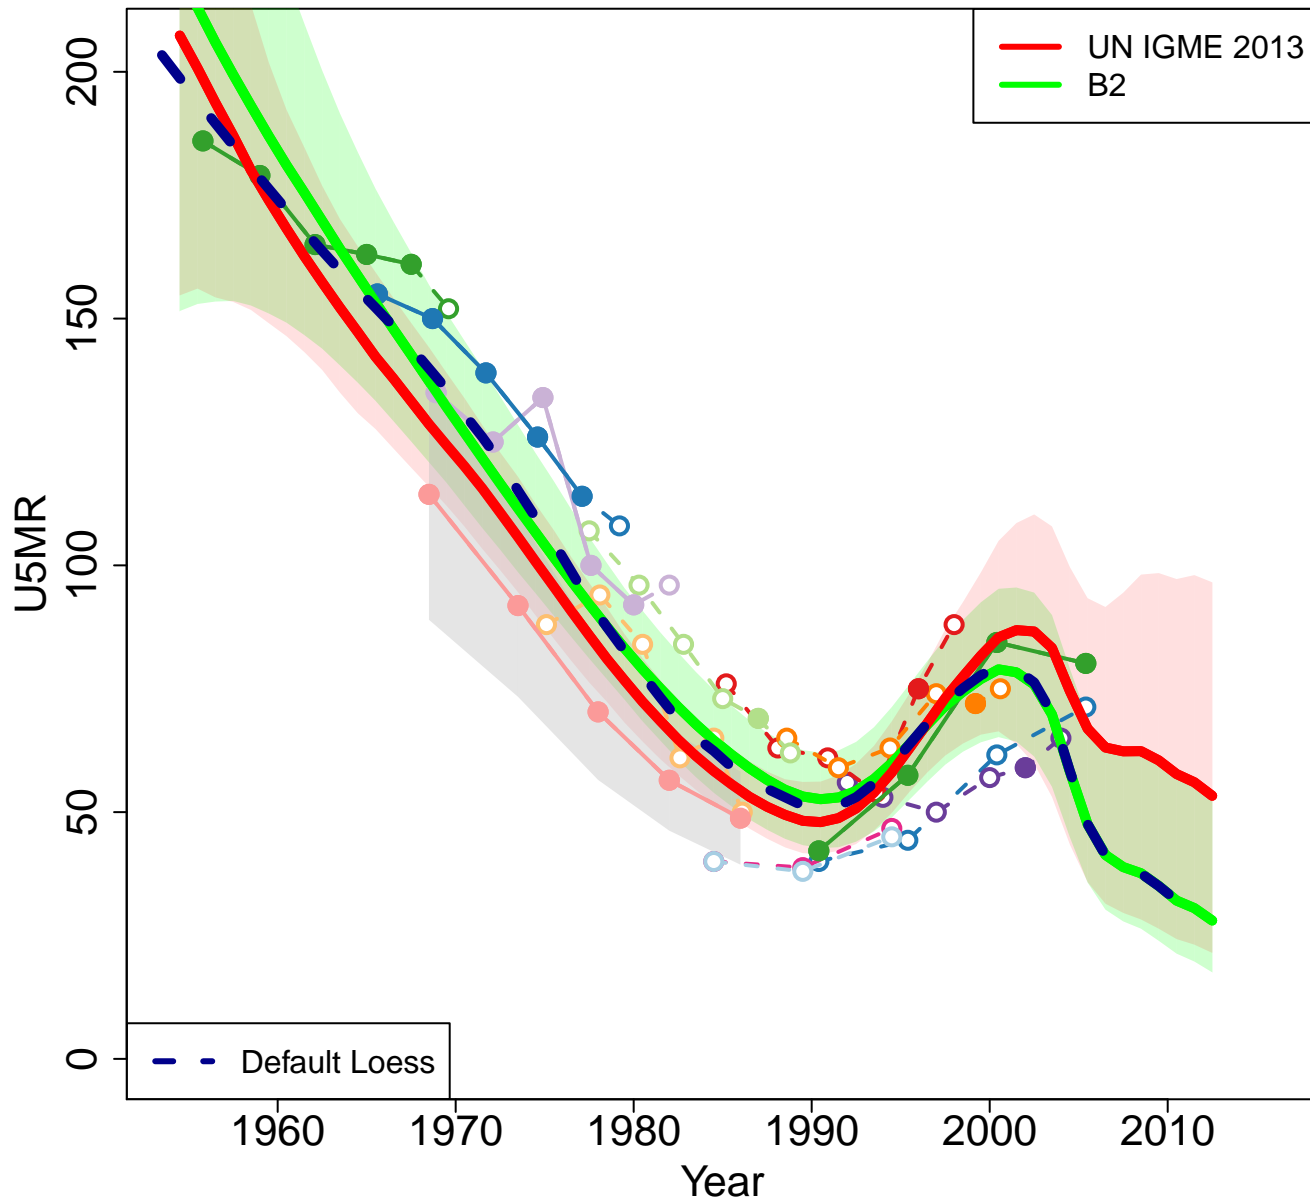

# Zoomed in

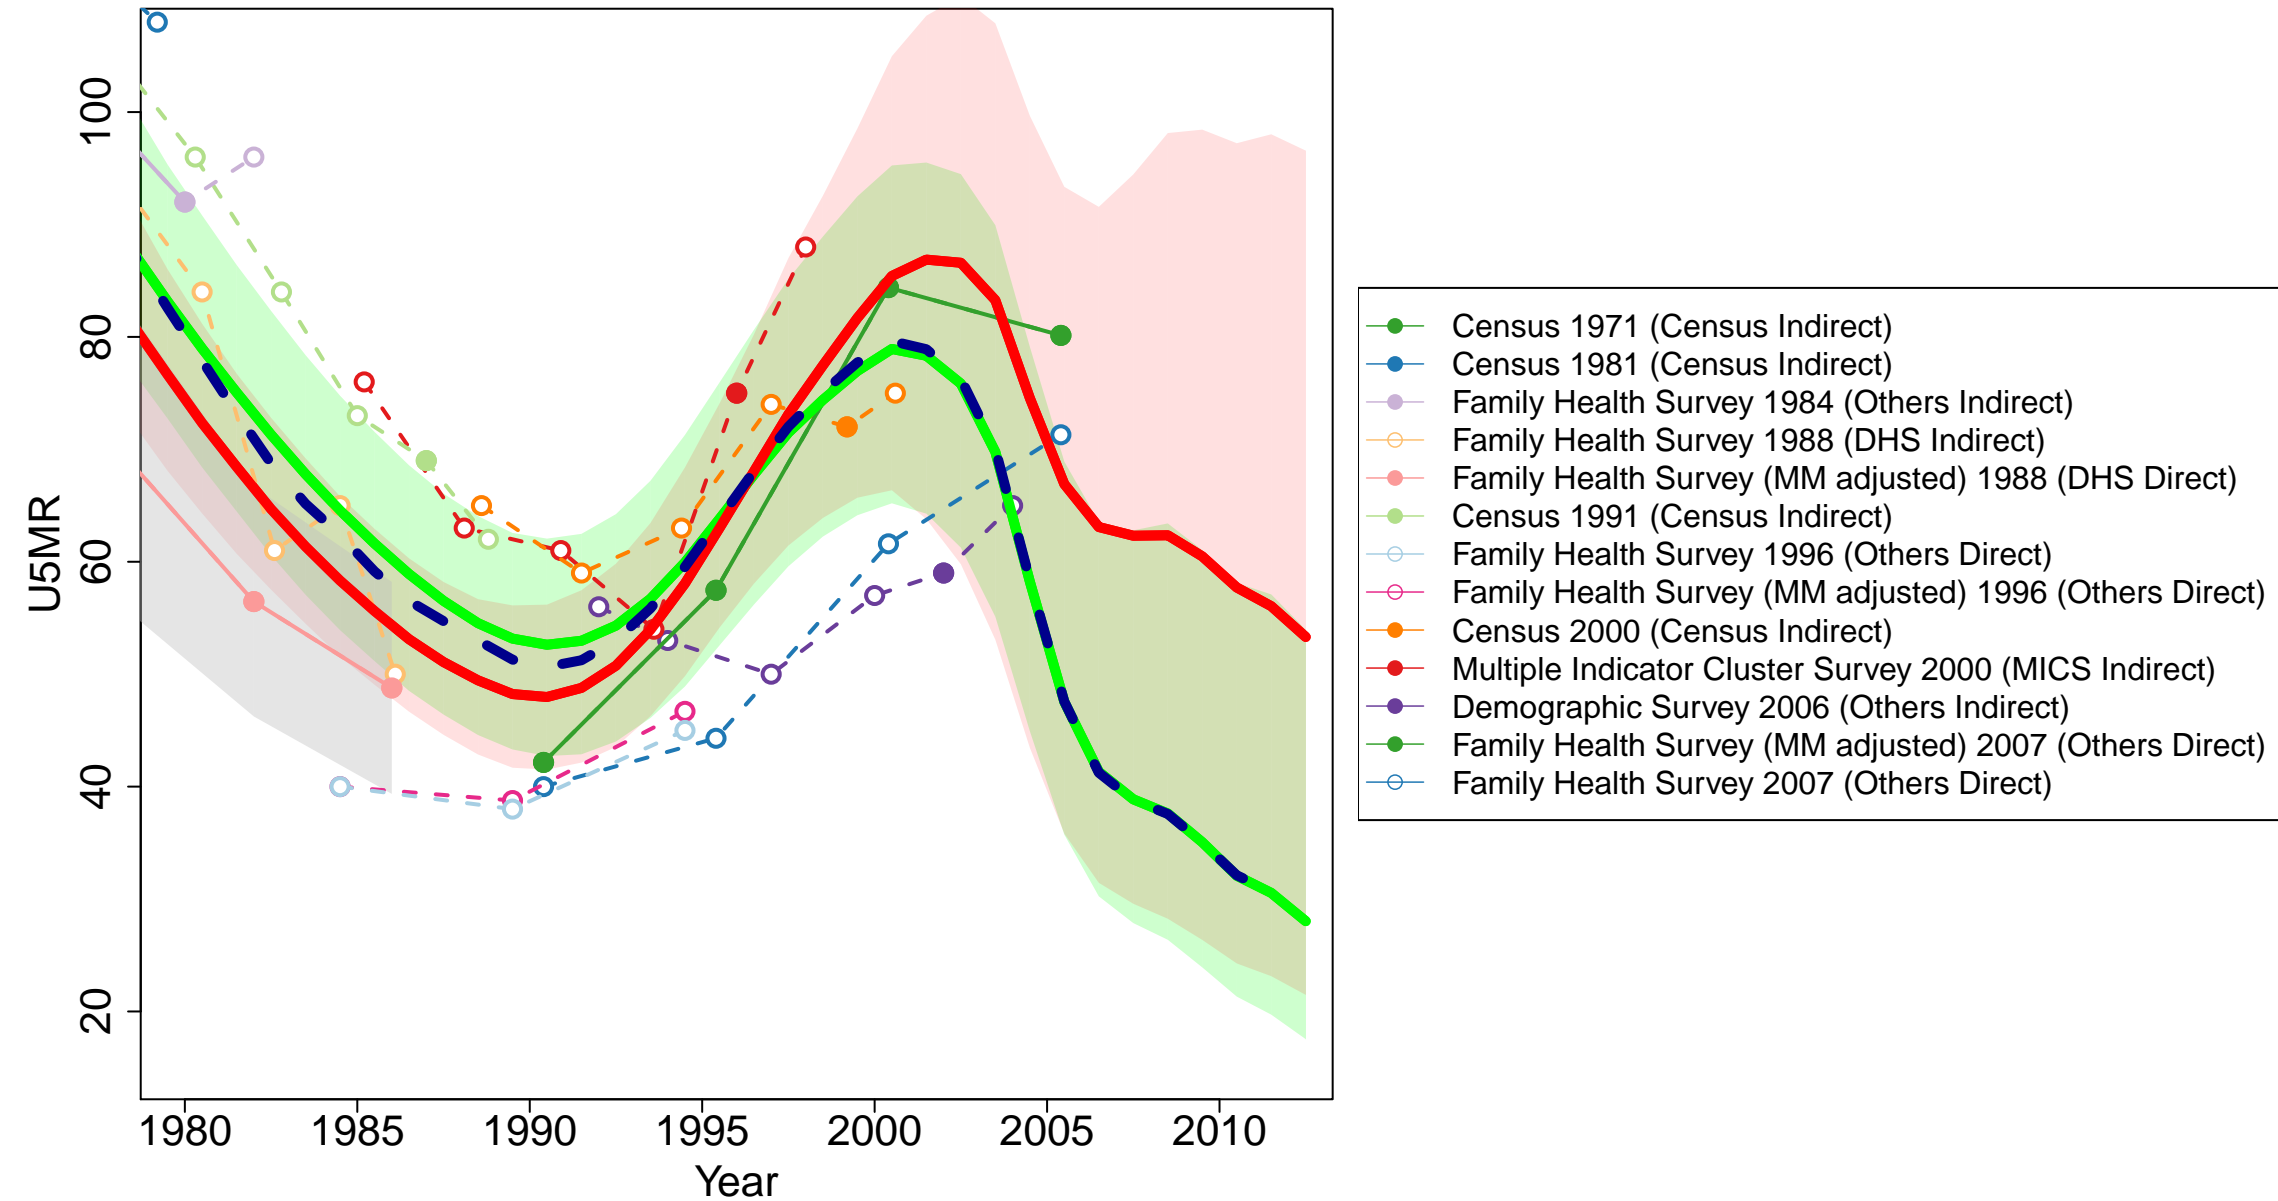

# Cameroon

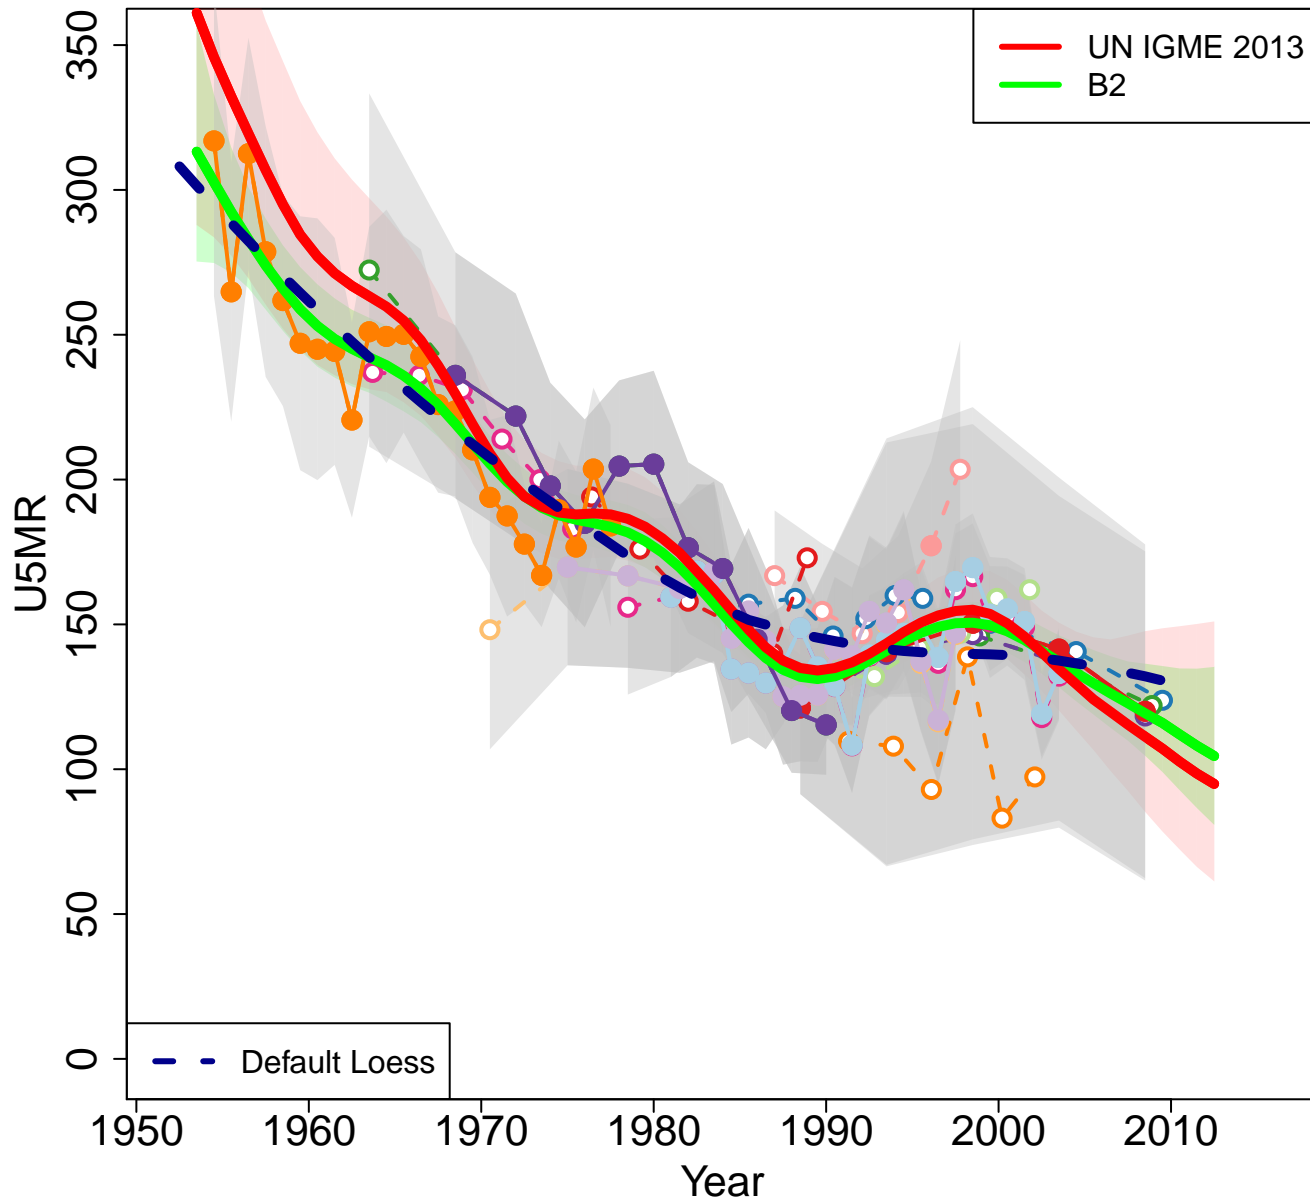

# Zoomed in

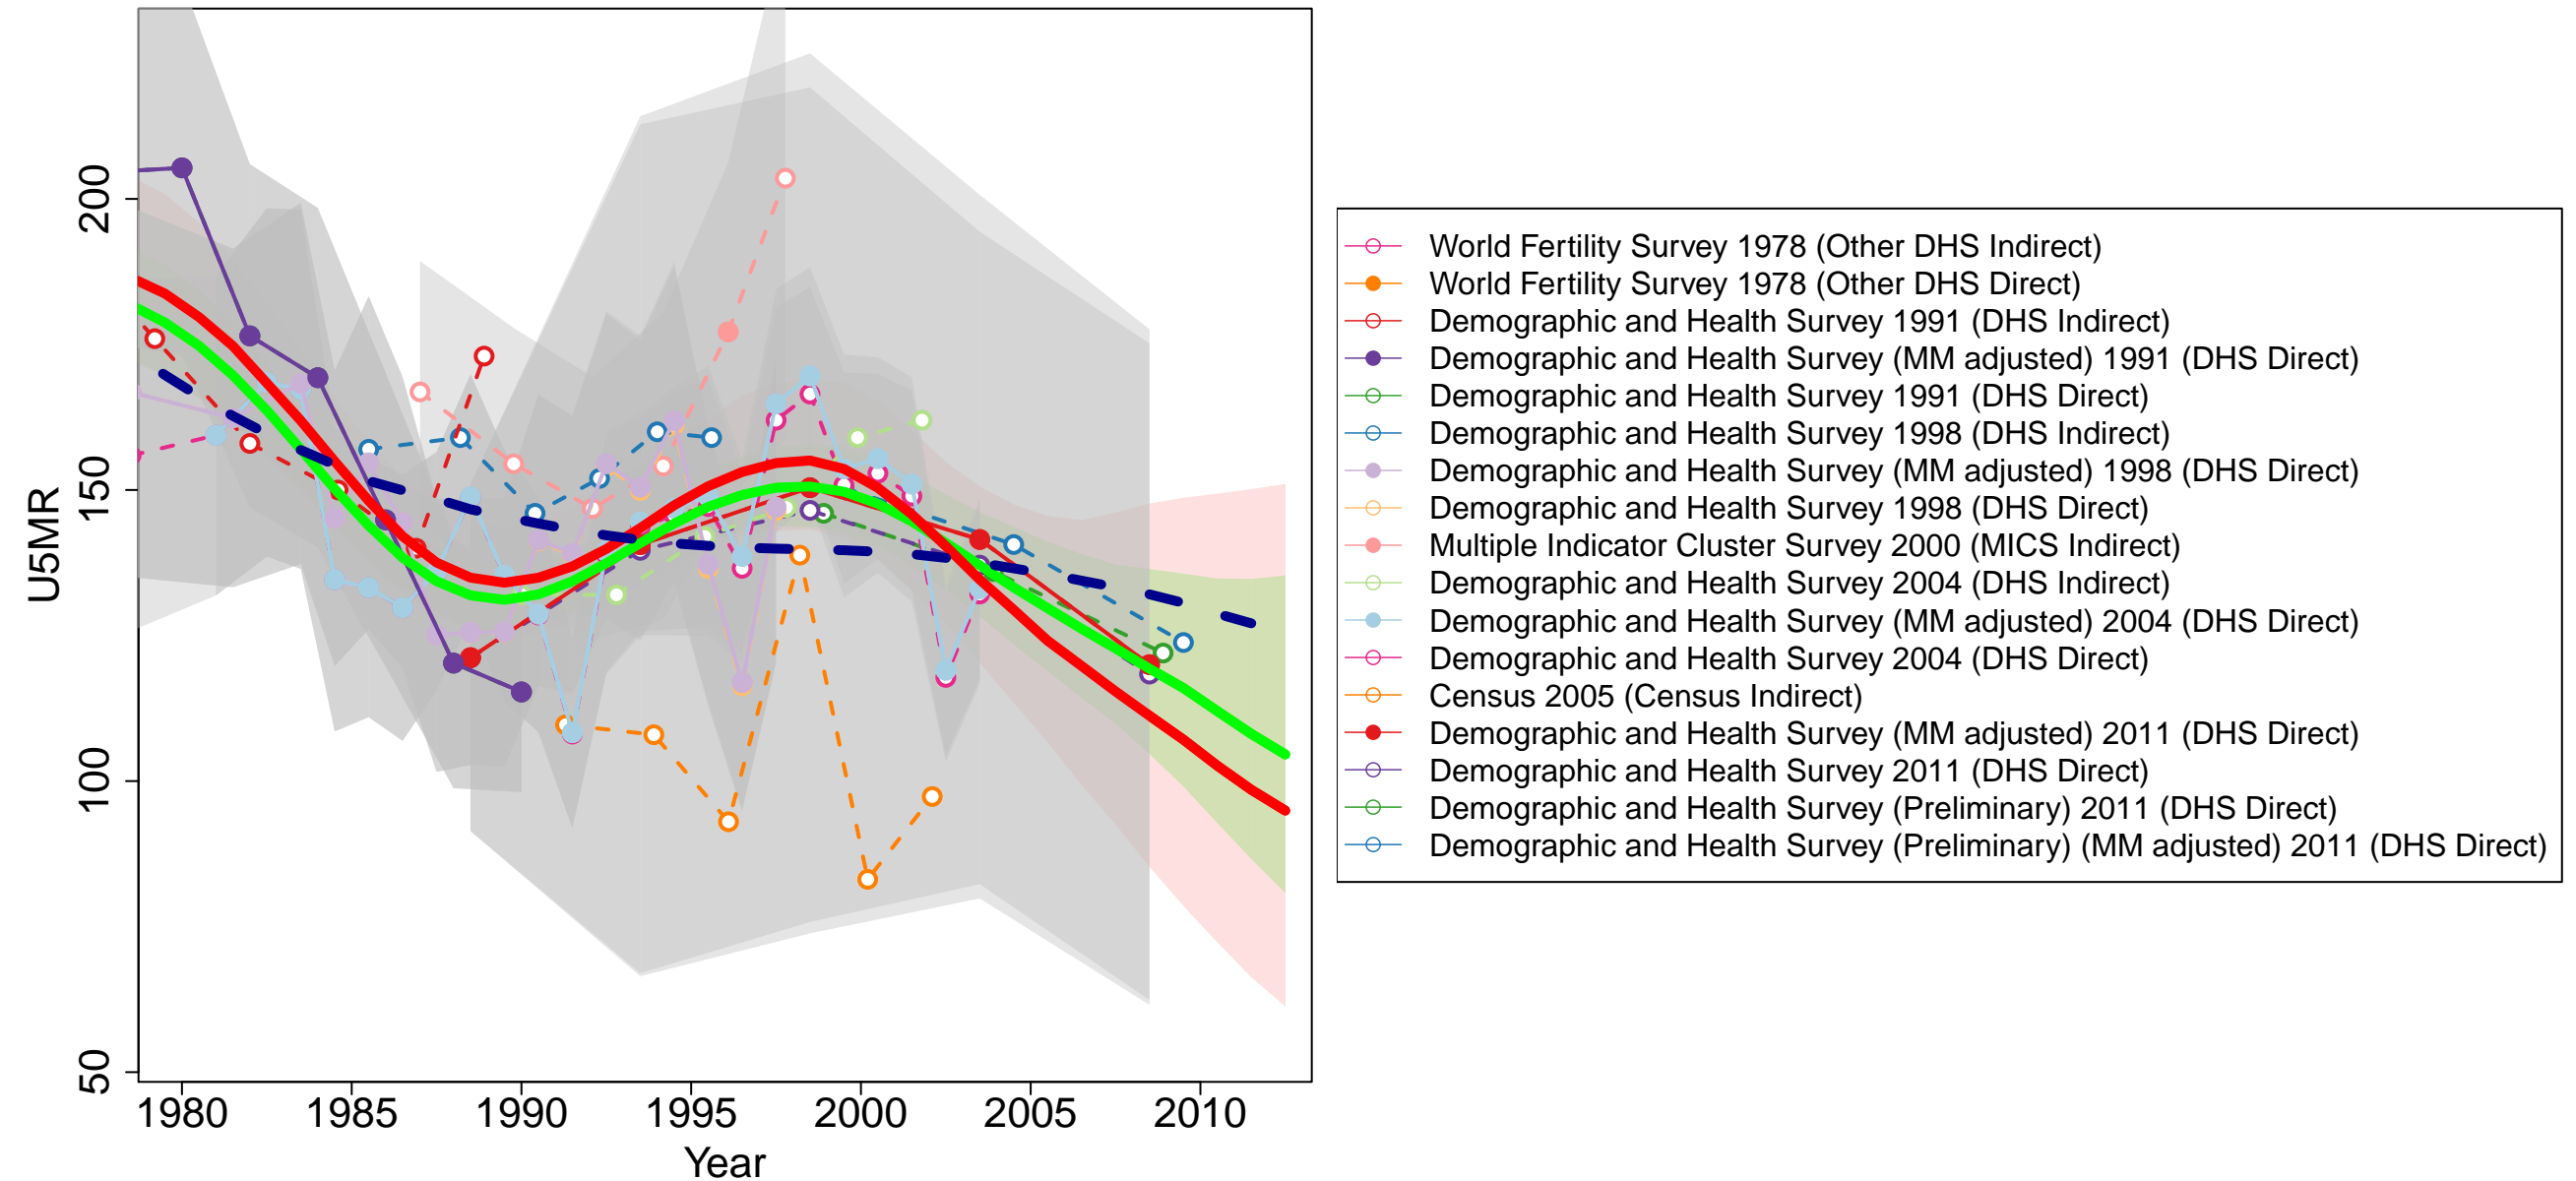

# Central African Republic

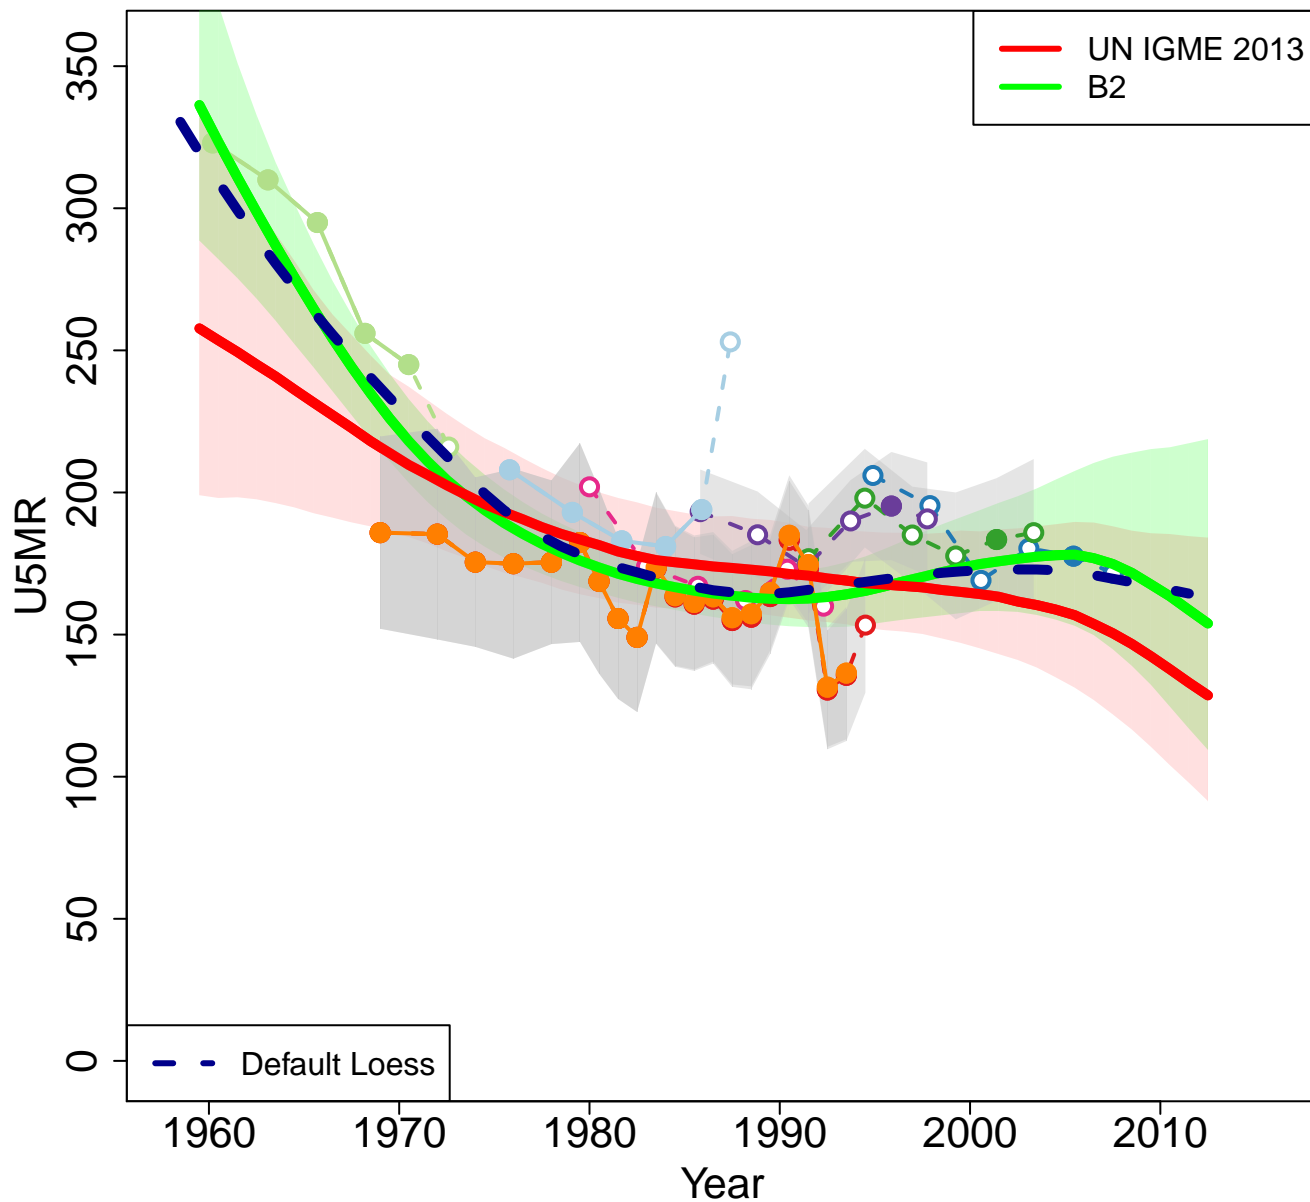

# Zoomed in

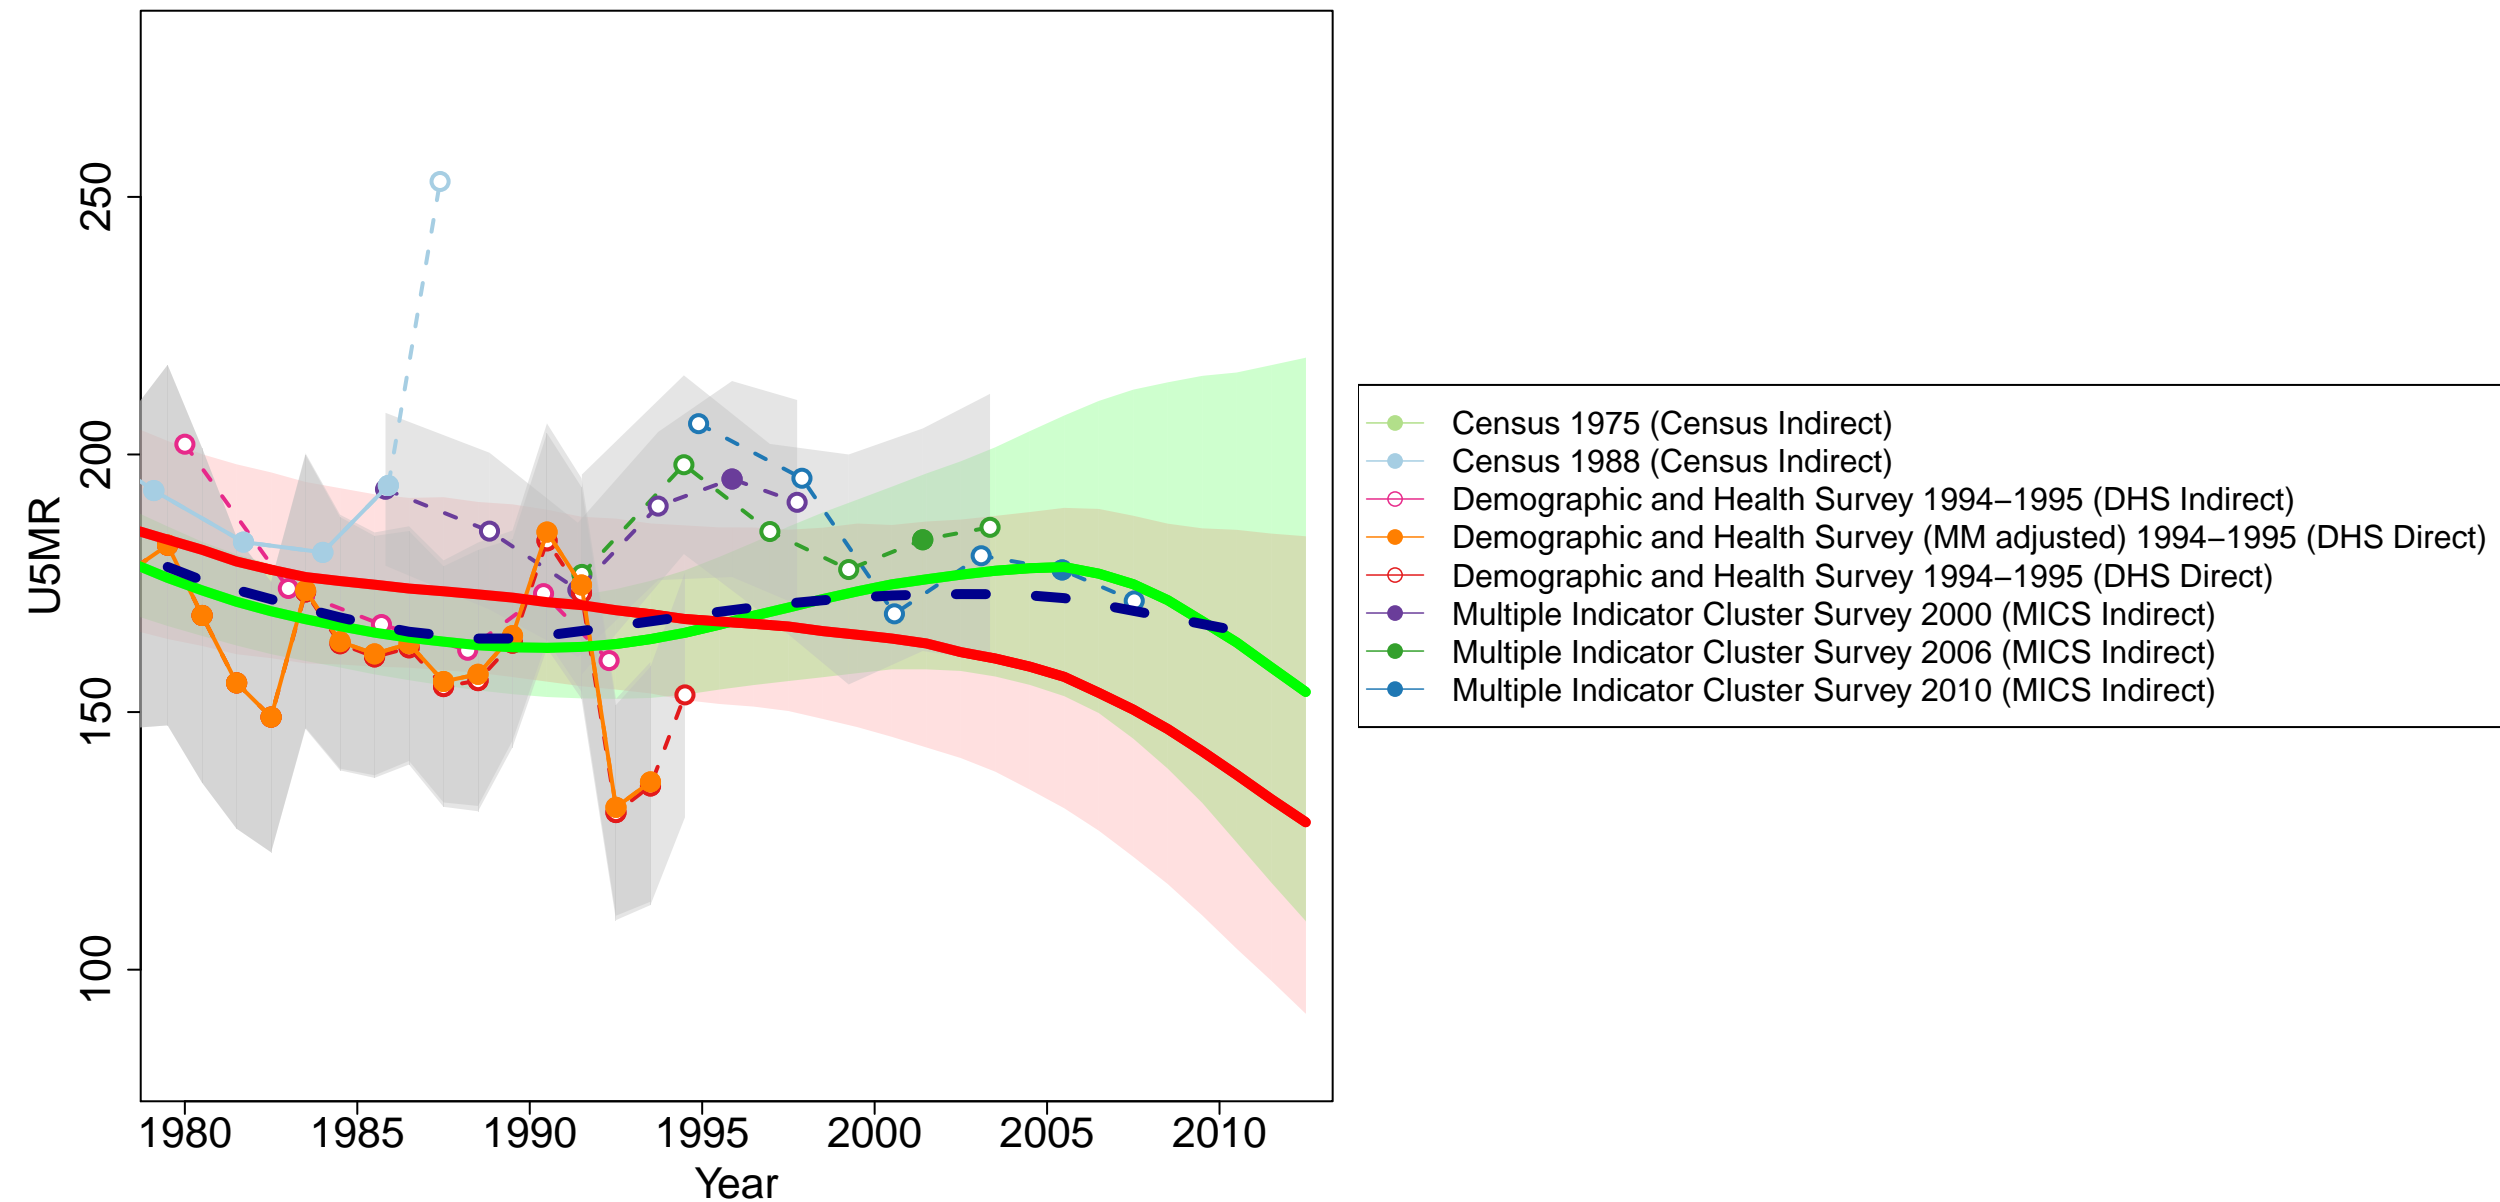



# Lesotho

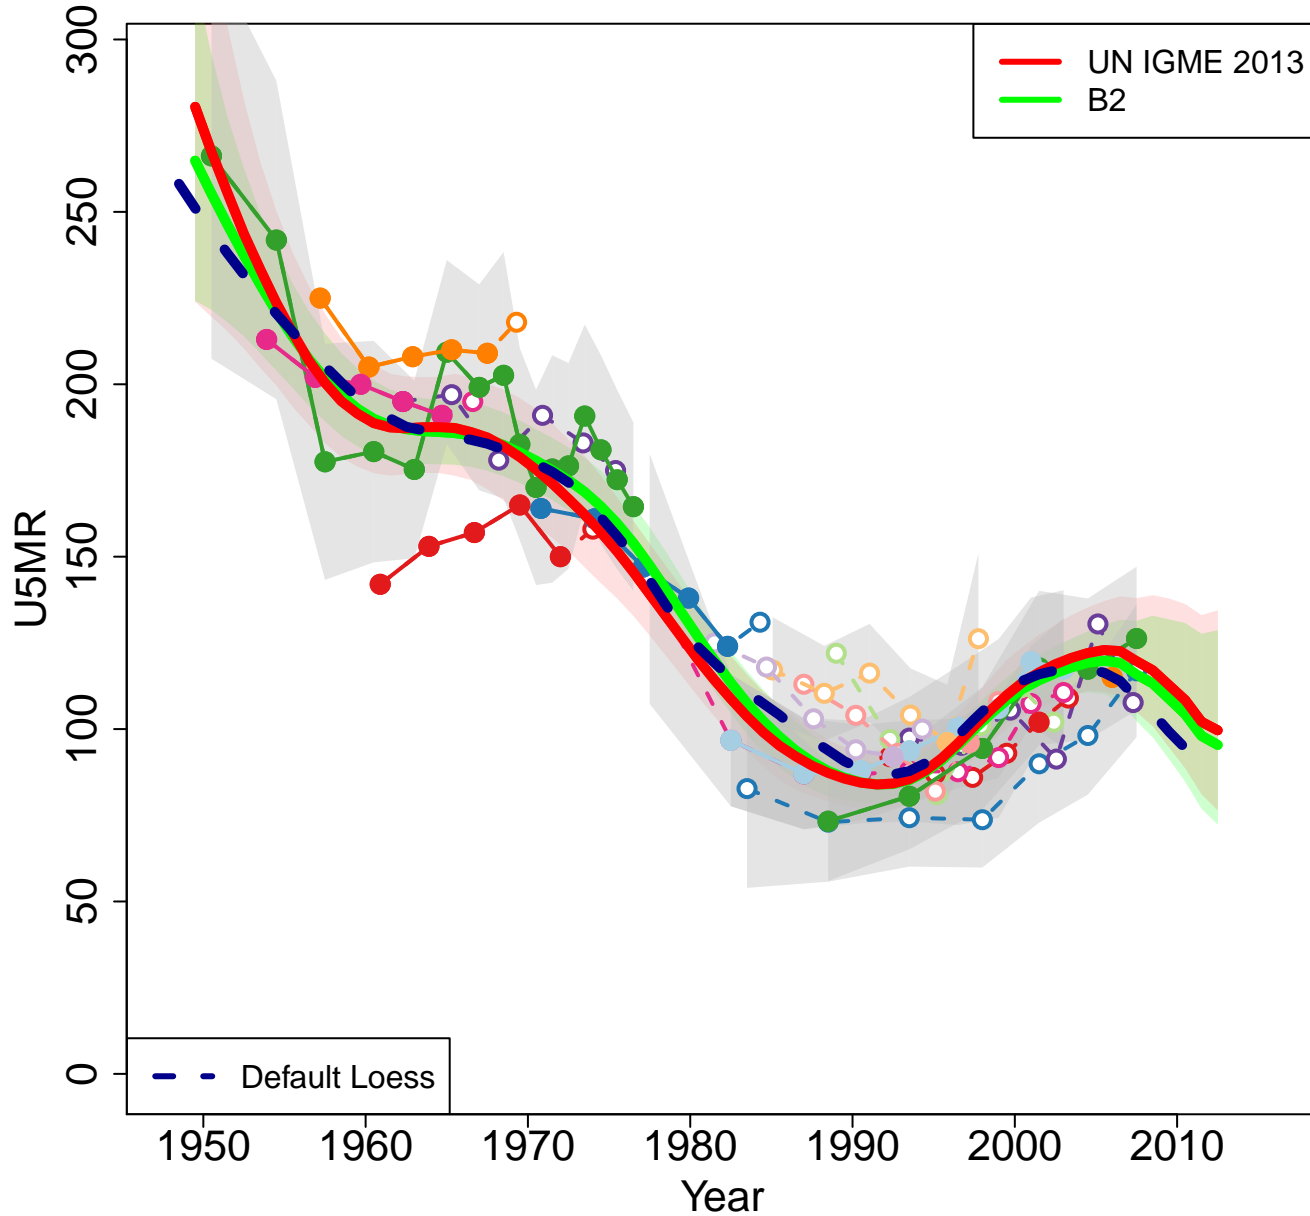

# Zoomed in

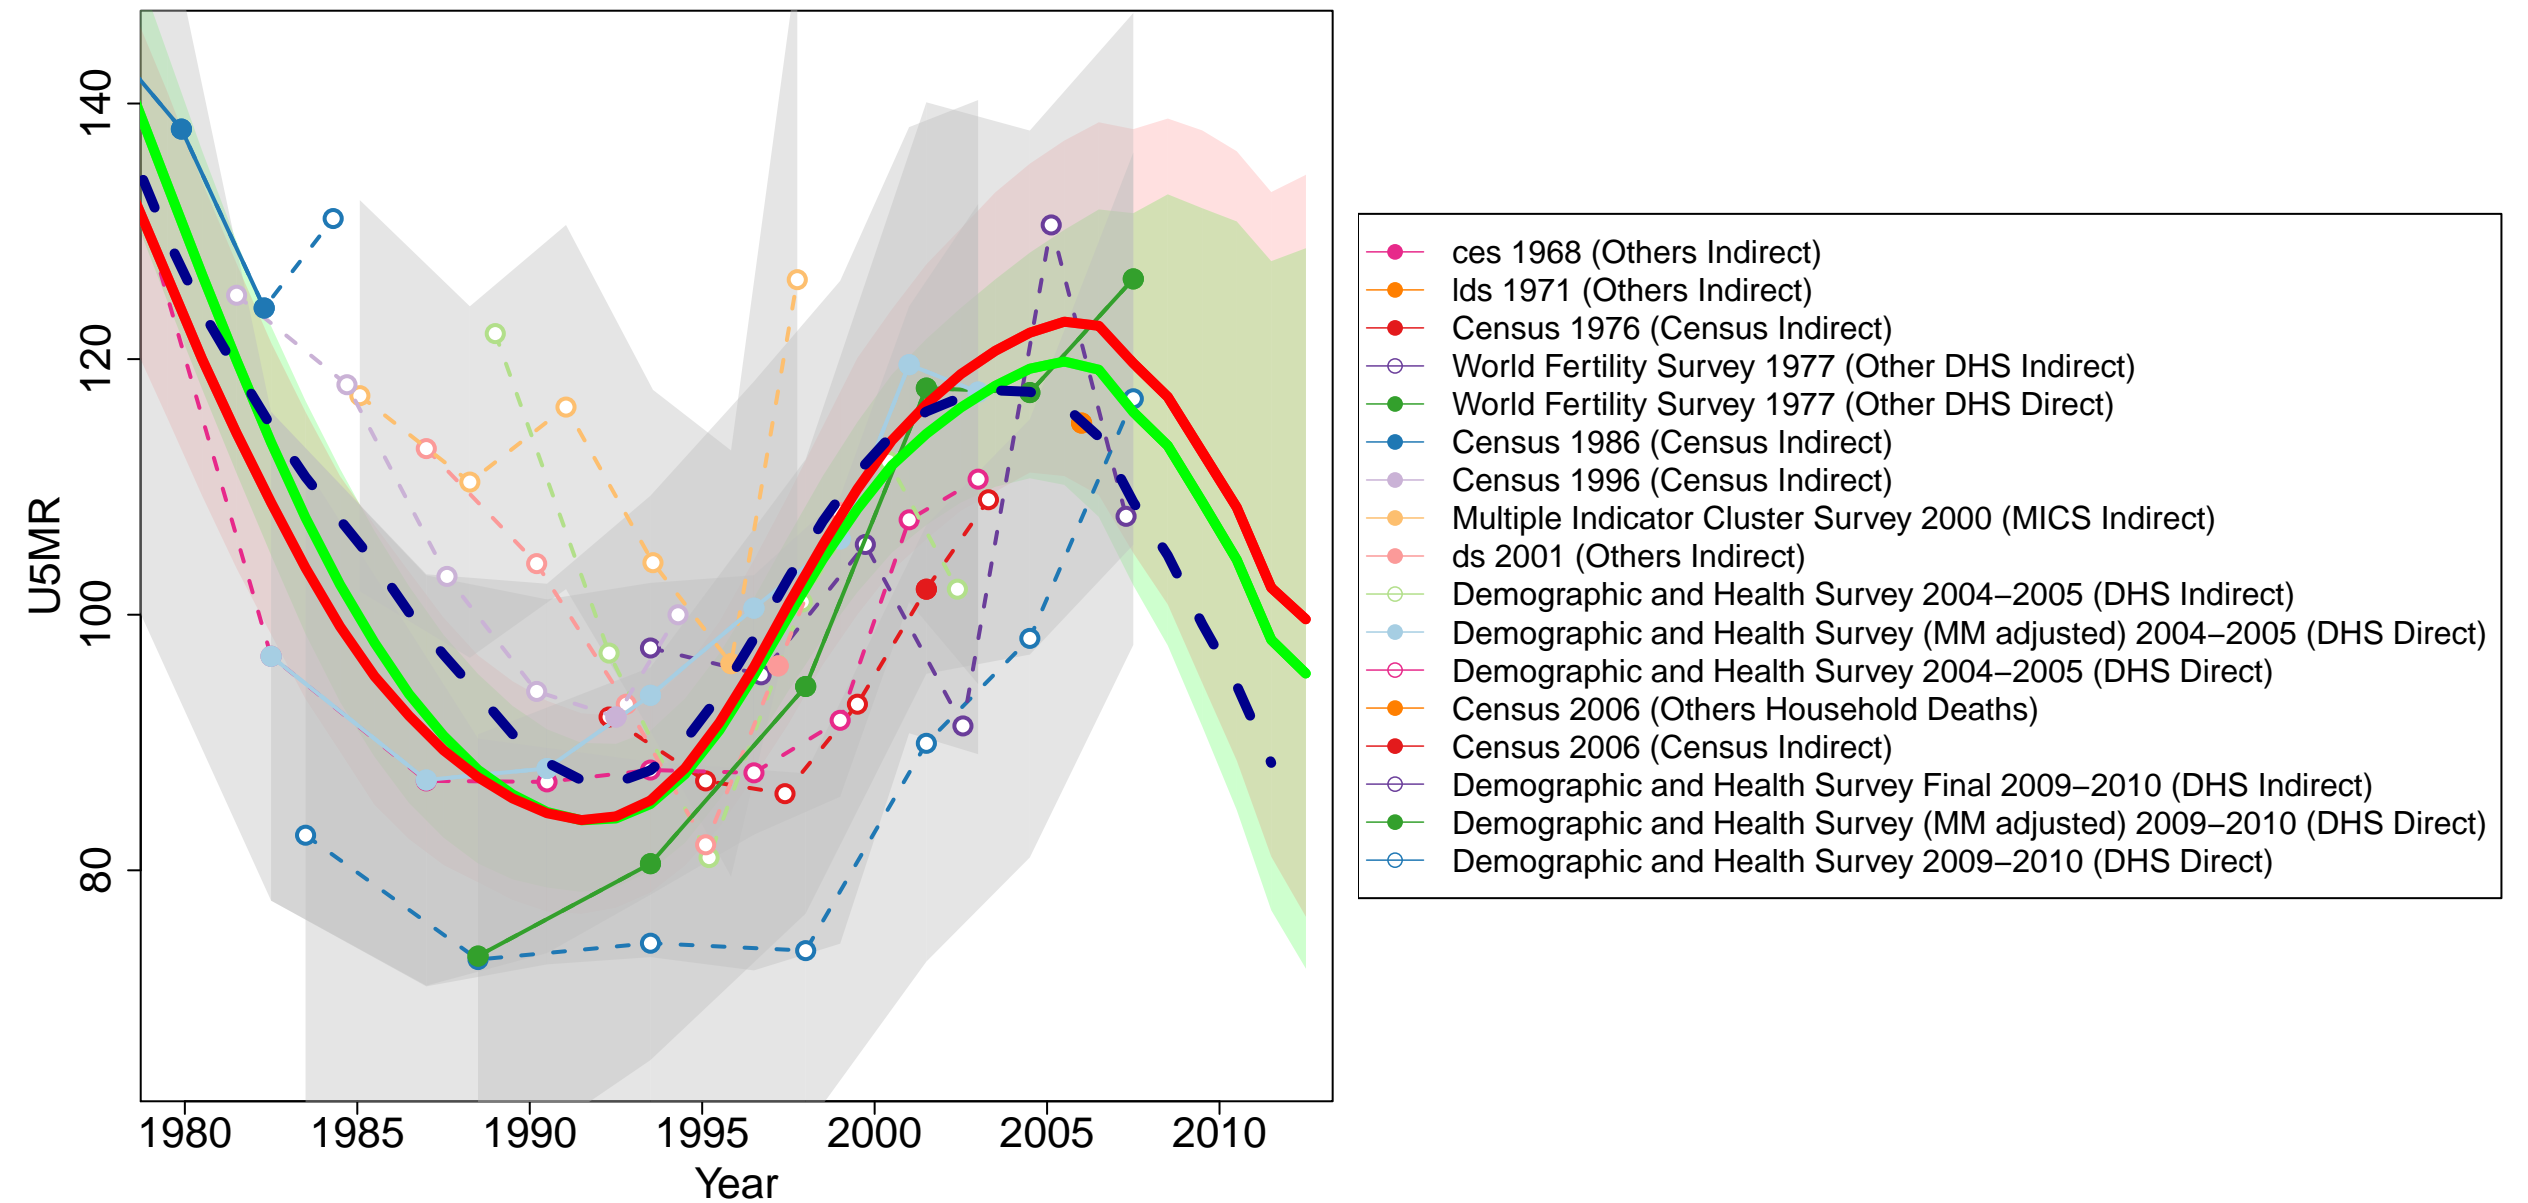

# Malawi

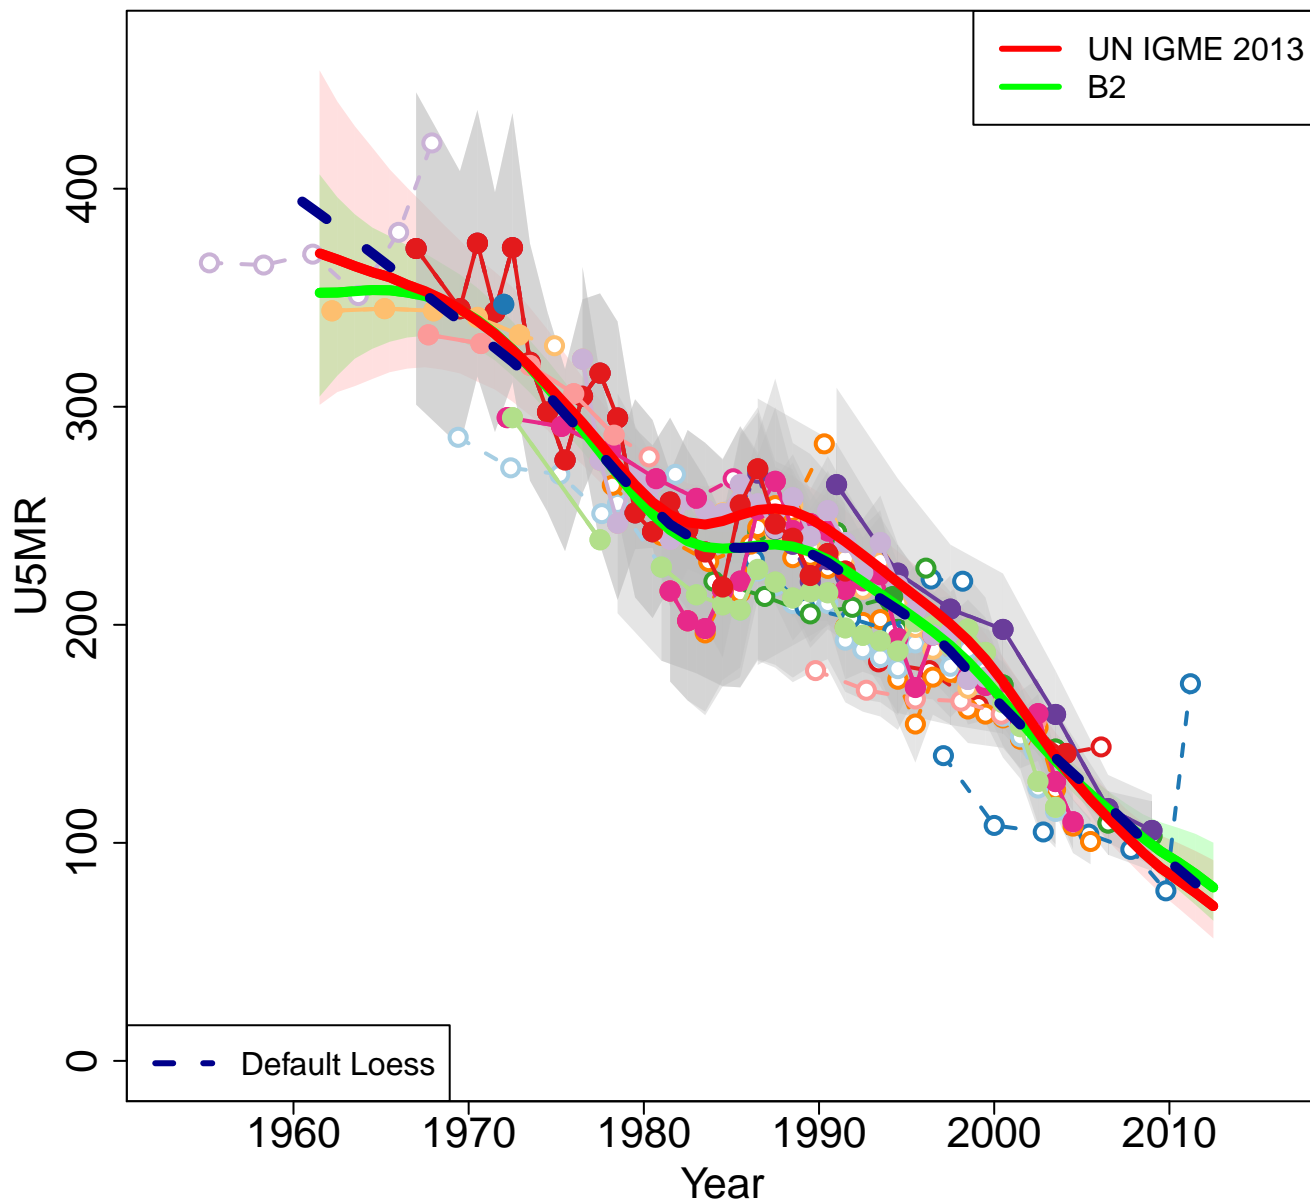

# Zoomed in

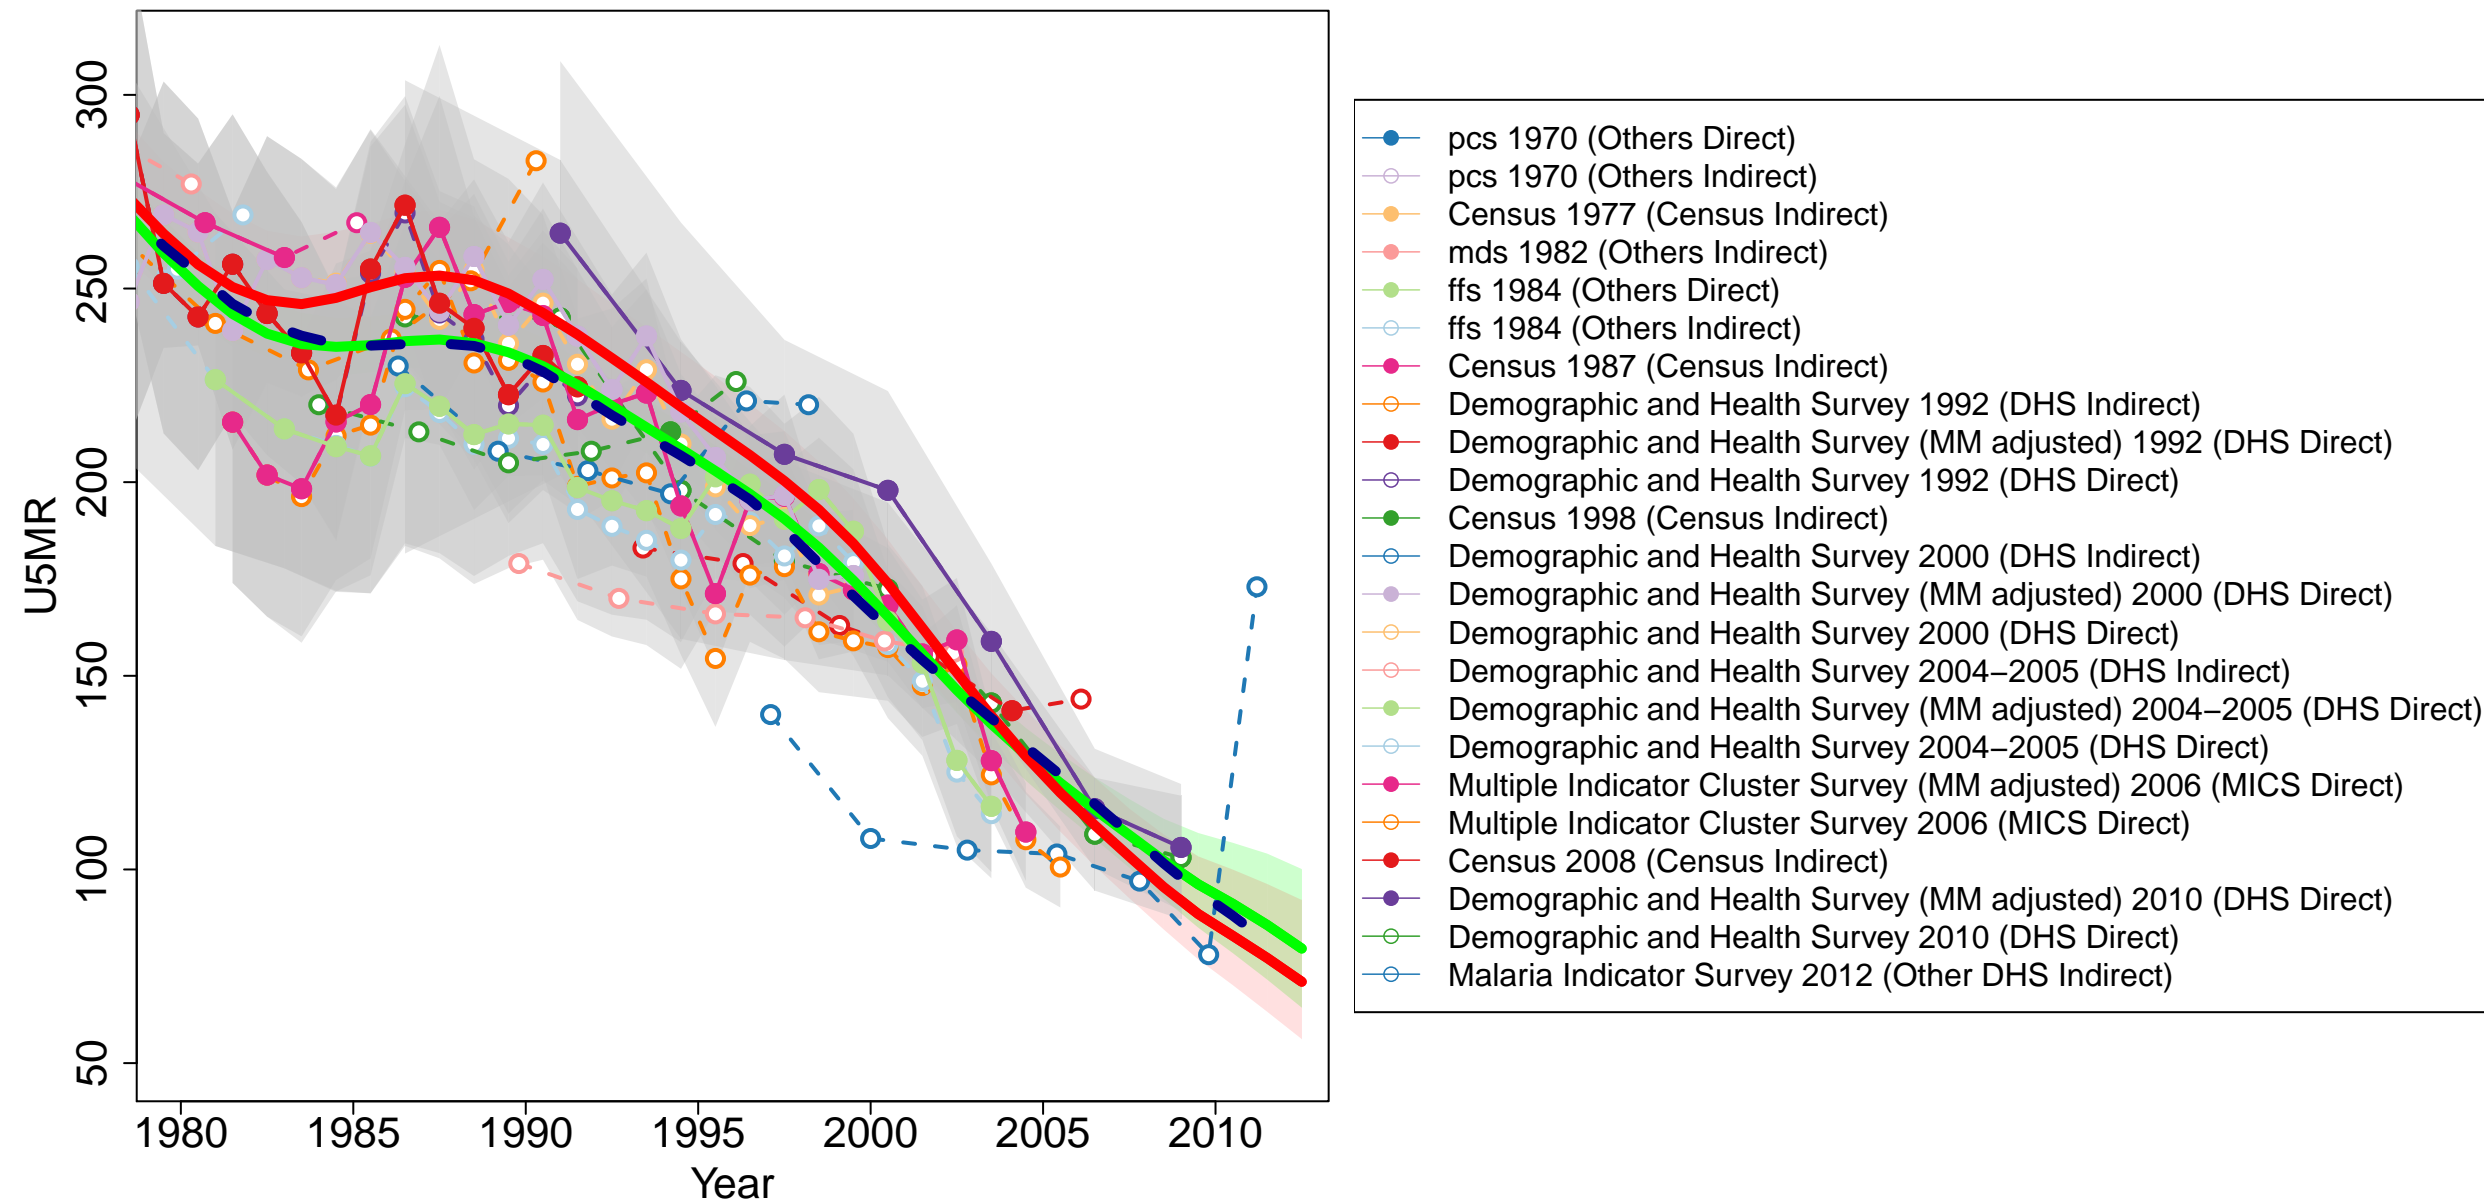

# Uganda

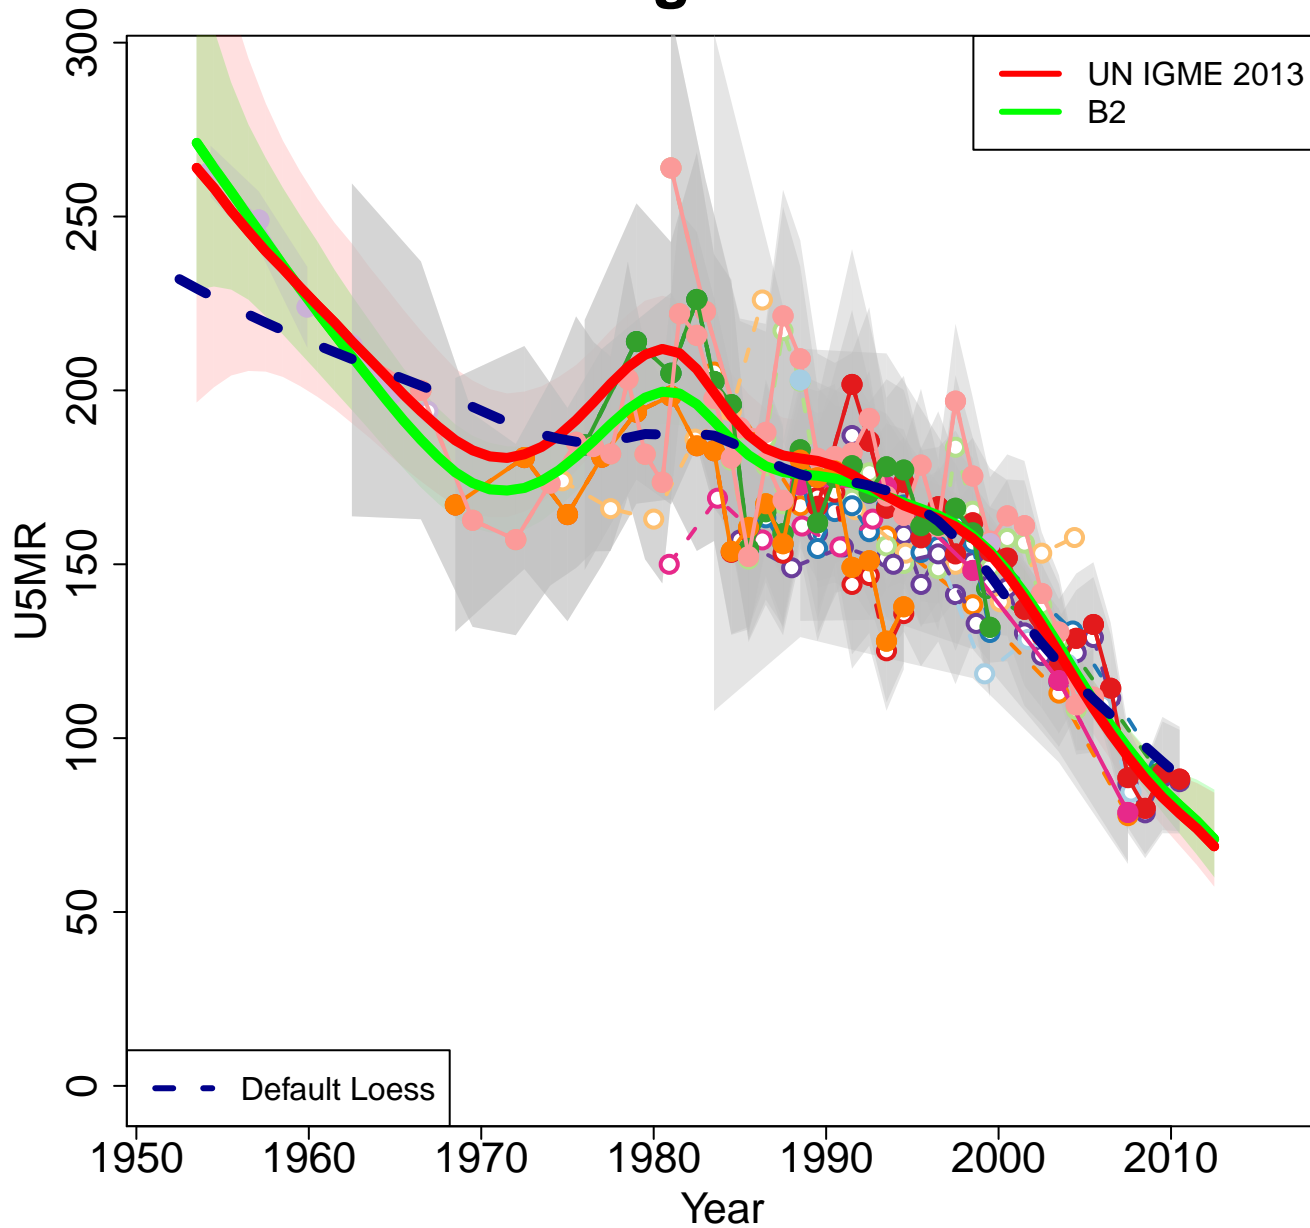

# Zoomed in

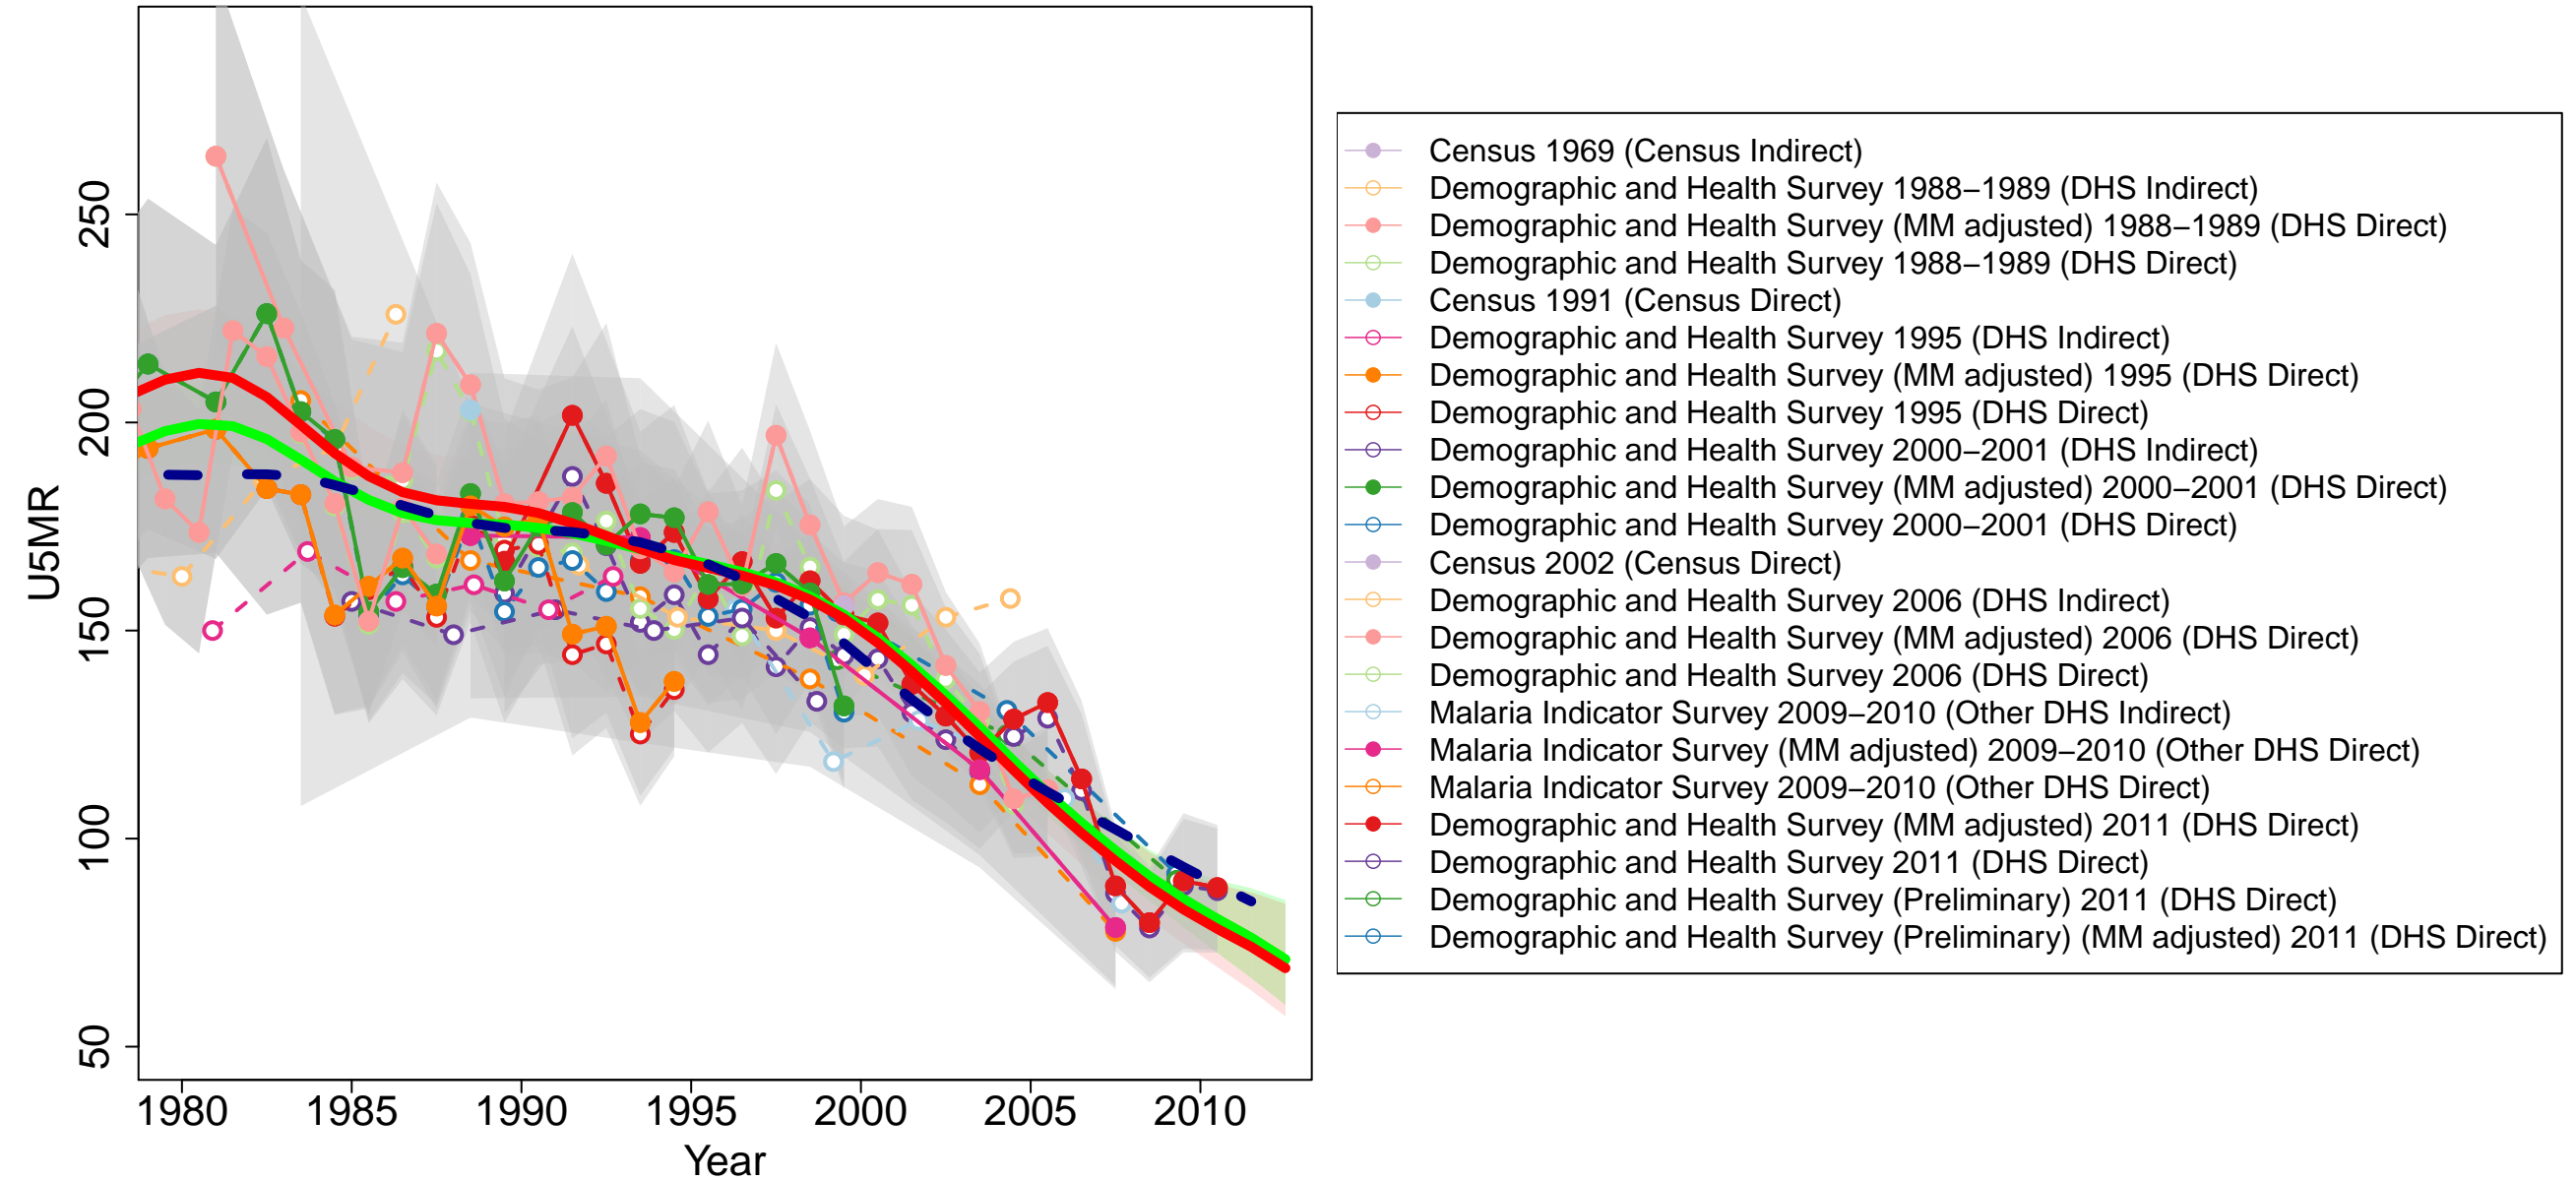

# Zimbabwe

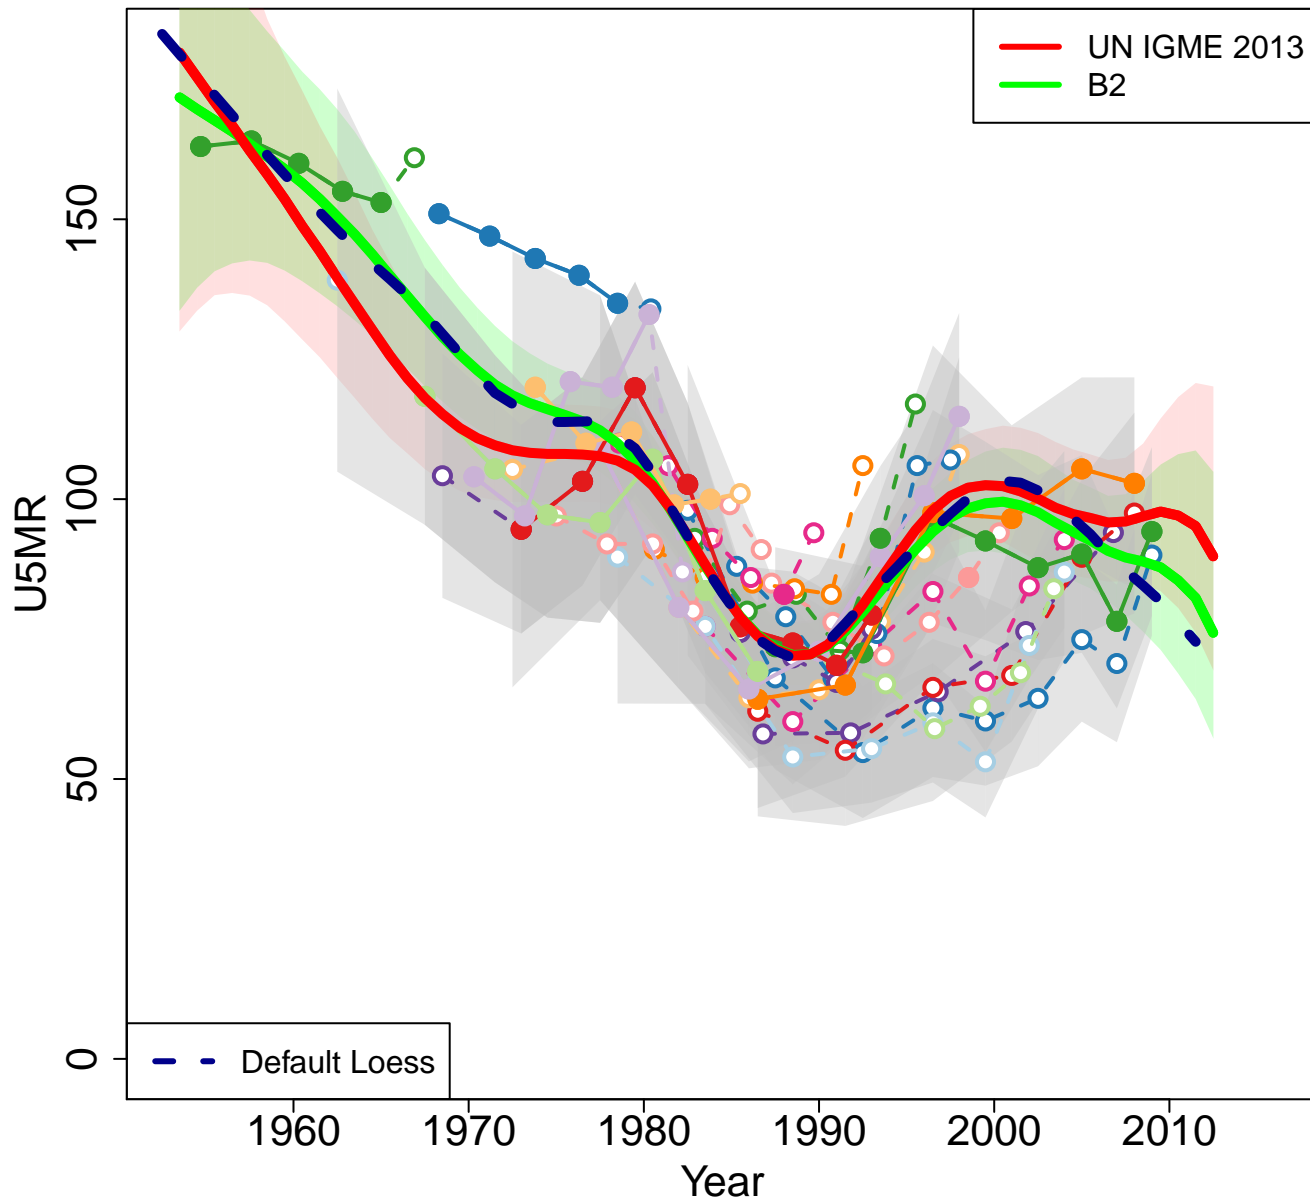

# Zoomed in

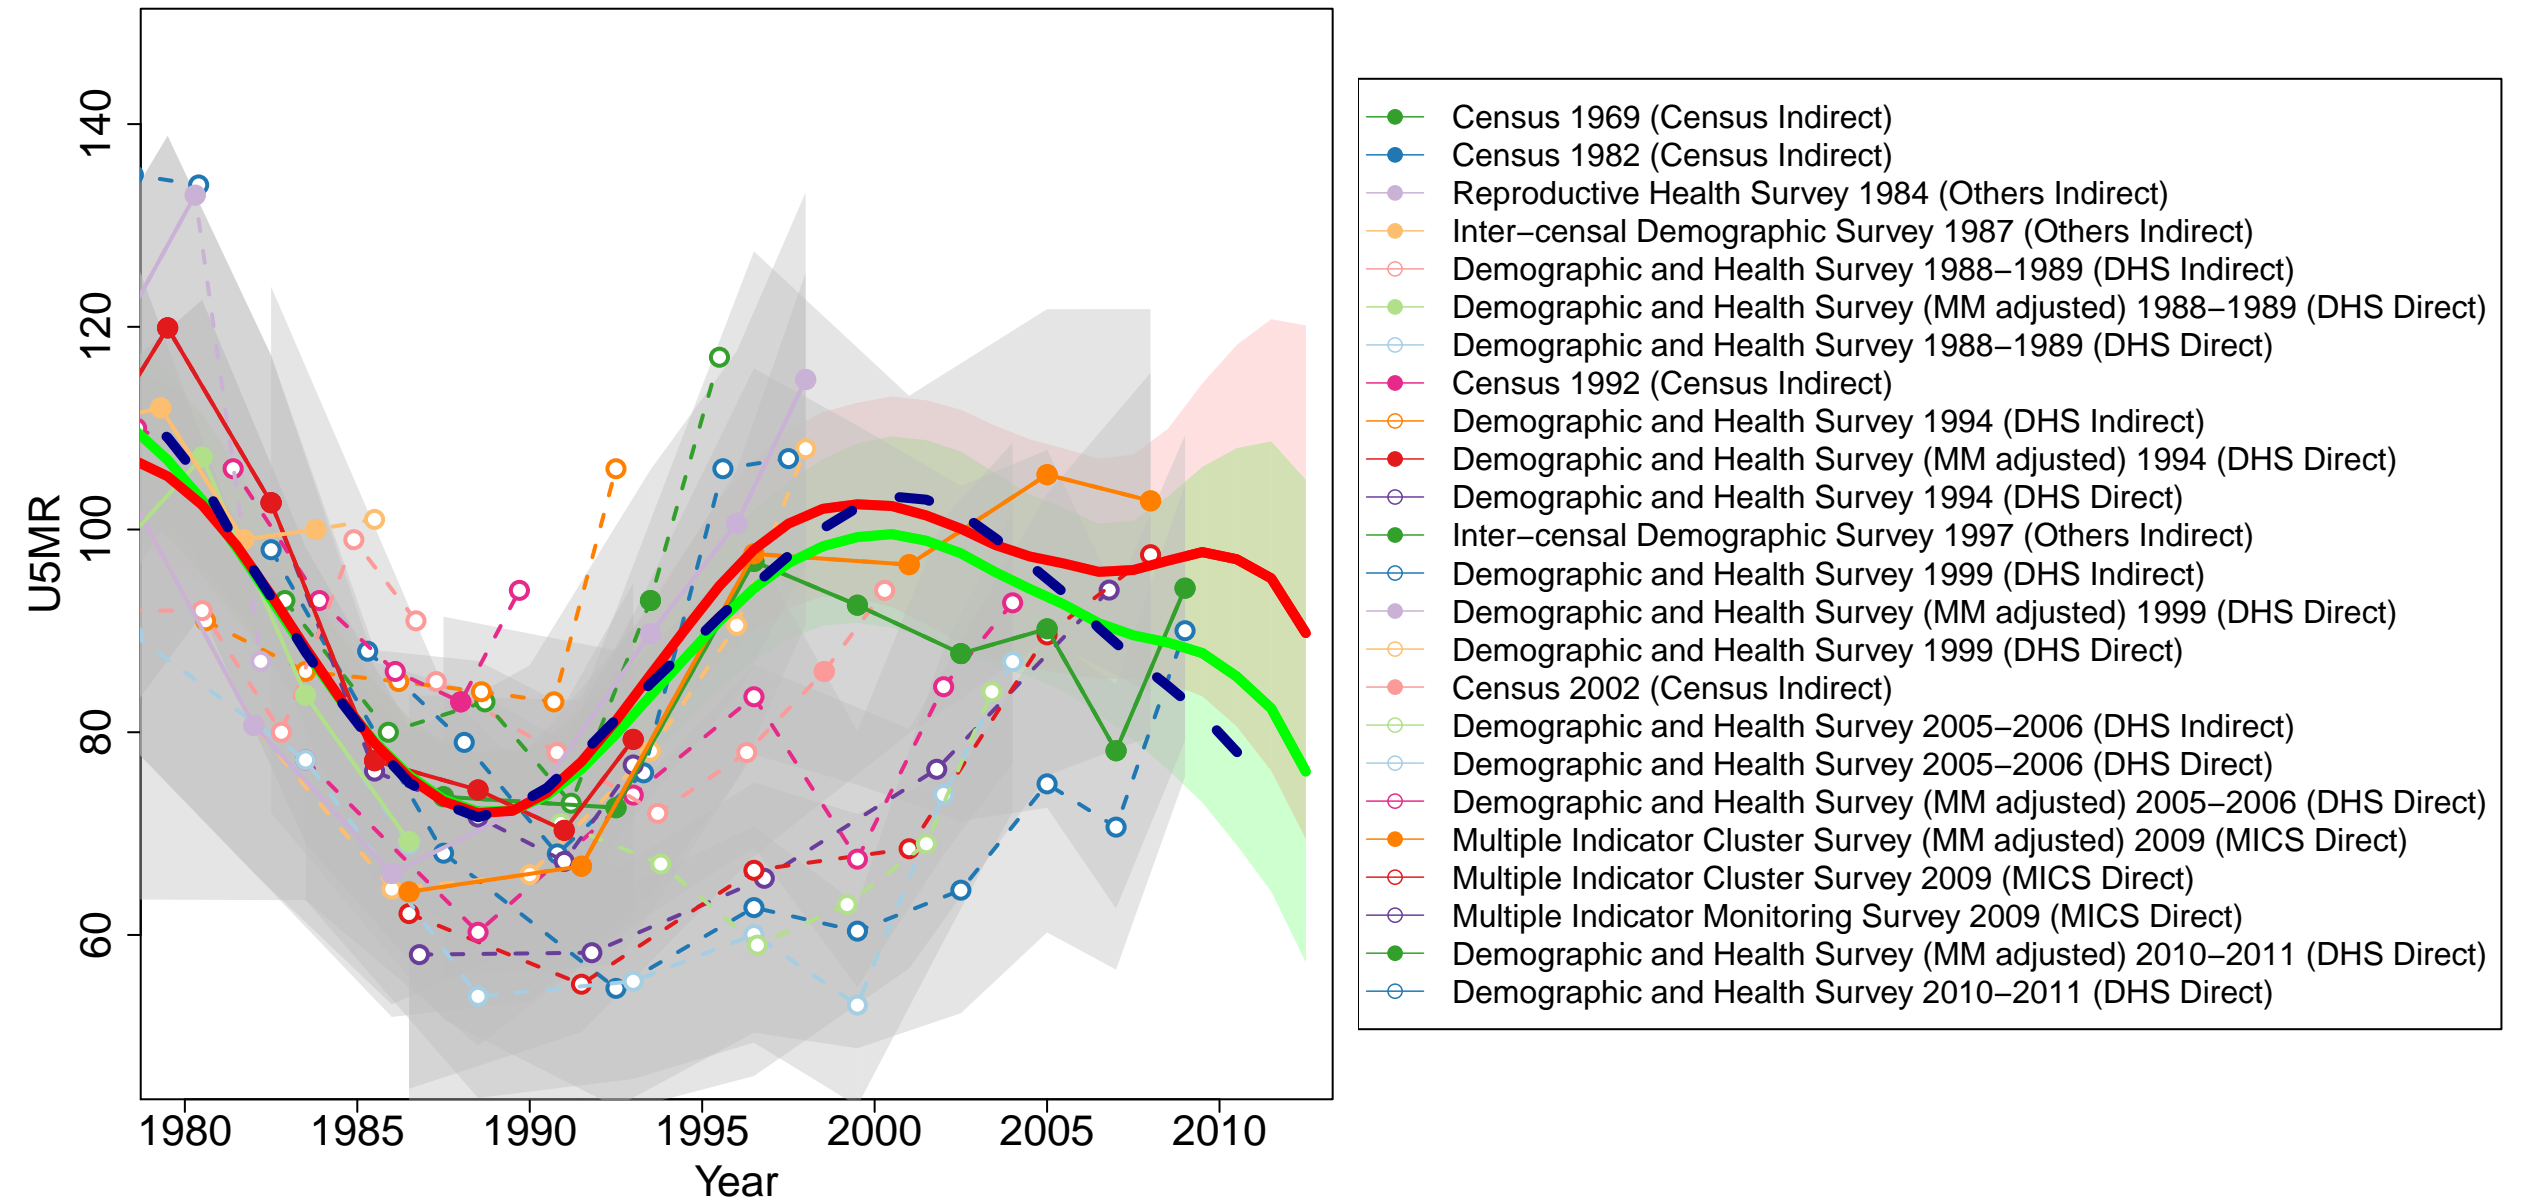

Supplement: S2 (10.1371/journal.pone.0101112.s002) [file journal.pone.0101112.s002]
